# 1 Common virulence gene expression in naïve and severe malaria

## 2 cases

3  
4  
5 Jan Stephan Wichers<sup>1,2</sup>, Gerry Tonkin-Hill<sup>3</sup>, Thorsten Thye<sup>4</sup>, Ralf Krumkamp<sup>4,5</sup>, Jan Strauss<sup>1,2,6</sup>,  
6 Heidrun von Thien<sup>1</sup>, Benno Kreuels<sup>4</sup>, Judith A.M. Scholz<sup>1</sup>, Helle Holm Hansson<sup>7</sup>, Rasmus  
7 Weisel Jensen<sup>7</sup>, Louise Turner<sup>7</sup>, Freia-Raphaella Lorenz<sup>8</sup>, Anna Schöllhorn<sup>8</sup>, Iris Bruchhaus<sup>1,6</sup>,  
8 Egbert Tannich<sup>4,5</sup>, Rolf Fendel<sup>8,9</sup>, Thomas D. Otto<sup>10</sup>, Thomas Lavstsen<sup>7</sup>, Tim-Wolf Gilberger<sup>1,2,6</sup>,  
9 Michael F. Duffy<sup>11</sup>, Anna Bachmann<sup>1,2,5, #</sup>

10  
11 <sup>1</sup> Molecular Biology and Immunology, Bernhard Nocht Institute for Tropical Medicine, 20359 Hamburg, Germany

12 <sup>2</sup> Centre for Structural Systems Biology, 22607 Hamburg, Germany

13 <sup>3</sup> Wellcome Sanger Institute, Hinxton/Cambridge CB10 1SA, UK

14 <sup>4</sup> Epidemiology and Diagnostics, Bernhard Nocht Institute for Tropical Medicine, 20359 Hamburg, Germany

15 <sup>5</sup> German Center for Infection Research (DZIF), partner site Hamburg-Borstel-Lübeck-Riems, Germany

16 <sup>6</sup> Biology Department, University of Hamburg, 22609 Hamburg, Germany

17 <sup>7</sup> CMP, University of Copenhagen, 2200 Copenhagen, Denmark

18 <sup>8</sup> Institute of Tropical Medicine, University of Tübingen, 72074 Tübingen, Germany

19 <sup>9</sup> German Center for Infection Research (DZIF), partner site Tübingen, Germany

20 <sup>10</sup> Institute of Infection, Immunity and Inflammation, University of Glasgow, Glasgow G12 8TA, UK

21 <sup>11</sup> Department of Microbiology and Immunology, University of Melbourne, Melbourne/Parkville VIC 3052, Australia

22  
23  
24 # corresponding author

25  
26  
27 Running title: In host expression of *var* genes

28

29

## 30 **Abstract**

31  
32 Sequestration of *Plasmodium falciparum*-infected erythrocytes to host endothelium through  
33 the parasite-derived PfEMP1 adhesion proteins, is central to the development of malaria path-  
34 ogenesis. PfEMP1 proteins have diversified and expanded to encompass many sequence var-  
35 iants conferring the same array of human endothelial receptor binding phenotypes. Here, we  
36 analyzed RNA-seq profiles of parasites isolated from 32 infected travelers returning to Ger-  
37 many. Patients were categorized into either malaria naïve (n=15) or pre-exposed (n=17), and  
38 into severe (n=8) or non-severe (n=24) cases. Expression analysis of PfEMP1-encoding *var*  
39 genes showed that severe malaria was associated with expression of PfEMP1 containing the  
40 endothelial protein C receptor (EPCR)-binding CIDR $\alpha$ 1 domain, whereas CD36-binding  
41 PfEMP1 was linked to non-severe malaria outcomes. In addition, gene expression-guided de-  
42 termination of parasite age, suggested that circulating parasites from non-severe malaria pa-  
43 tients were older than parasites from severe malaria patients. First-time infected patients were  
44 also more likely to develop severe symptoms and tended to be infected for a longer period,  
45 which thus appeared to select for parasites with more sequestration-efficiency and therefore  
46 more pathogenic PfEMP1 variants.

47  
48 **Keywords:** *P. falciparum*, PfEMP1, RNA-seq, transcriptomics, variant surface antigens

## 50 **Introduction**

51 Despite considerable efforts during recent years to combat malaria, this disease remains a  
52 major threat to public health in tropical countries. The most severe clinical courses of malaria  
53 are due to infections with the protozoan species *Plasmodium falciparum*. In 2018, there were  
54 228 million cases of malaria worldwide, resulting in more than 400,000 deaths (WHO, 2019).  
55 Currently, about half of the world population is living at risk of infection and more than 90% of  
56 the malaria deaths occur in Africa. In particular, children under the age of five and pregnant  
57 women suffer from severe disease. The virulence of *P. falciparum* is linked to the infected  
58 erythrocytes binding to endothelial cell surface molecules expressed on blood vessel walls.  
59 This phenomenon, known as sequestration, prevents the passage of infected erythrocytes  
60 through the spleen, which would otherwise remove the infected erythrocytes from the circula-  
61 tion and kill the parasite (Saul, 1999). The membrane proteins mediating sequestration are  
62 exposed to the host's immune system and through evolution *P. falciparum* parasites have ac-  
63 quired several multi-copy gene families coding for variant surface antigens (VSAs) allowing  
64 immune escape through extensive sequence polymorphisms. Endothelial sequestration is me-  
65 diated by the *P. falciparum* erythrocyte membrane protein 1 (PfEMP1) family, which members  
66 have different binding capacities for host vascular tissue receptors such as CD36, EPCR,

67 ICAM-1, PECAM1, receptor for complement component C1q (gC1qR) and CSA. *PfEMP1* pro-  
68 teins are known to mediate adhesion of infected erythrocytes to the linings of small blood ves-  
69 sels (Magallón-Tejada *et al*, 2016; Turner *et al*, 2013; Rowe *et al*, 2009). The long, variable,  
70 extracellular *PfEMP1* region responsible for receptor binding contains a single N-terminal seg-  
71 ment (NTS main classes A, B and pam) and a variable number of different Duffy-binding like  
72 (DBL main classes are DBL $\alpha$ - $\zeta$  and pam) and cysteine-rich inter-domain region domains (CIDR  
73 main classes are CIDR $\alpha$ - $\delta$  and pam) domains (Rask *et al*, 2010). Based on recent findings,  
74 the sub-classification within main domain classes, e.g. the DBL $\beta$  subclasses 1 – 13, was ques-  
75 tioned due to recombination occurring frequently between members of the different subclasses  
76 (Otto *et al*, 2019). *PfEMP1* molecules have been grouped into four categories (A, B, C and E)  
77 depending on the protein domain composition as well as the 5' upstream sequence, the chro-  
78 mosomal localization and the direction of transcription of their encoding *var* genes (Rask *et al*,  
79 2010; Kyes *et al*, 2007; Kraemer & Smith, 2003; Lavstsen *et al*, 2003). Each parasite pos-  
80 sesses about 60 *var* genes with approximately the same distribution over the different groups  
81 (Rask *et al*, 2010). About 10% of the genes belong to A-type *var* genes, typically encoding  
82 longer *PfEMP1* proteins with a head-structure containing a DBL $\alpha$ 1 and either a CIDR $\alpha$ 1 or a  
83 CIDR $\beta$ / $\gamma$ / $\delta$  domain. In some A-type proteins, an ICAM-1-binding DBL $\beta$ 1 or 3 domain follows  
84 this head-structure (Lennartz *et al*, 2017). Two conserved subfamilies also belong to the group  
85 A: the *var1* gene present in two different allele forms in the parasite population (3D7- and IT-  
86 type) (Otto *et al*, 2019) and the shortest *var3* gene family with only two extracellularly exposed  
87 domains (DBL $\alpha$ 1.3 and DBL $\epsilon$ 8). Most *PfEMP1* proteins belong to the B- and C-families and  
88 have a DBL $\alpha$ 0-CIDR $\alpha$ 2-6 head structure attached to a DBL $\delta$ 1-CIDR $\beta$ / $\gamma$  domain combination.  
89 Some B-type proteins possess a DBL $\alpha$ 2-CIDR $\alpha$ 1 head-structure typically followed by addi-  
90 tional domains including DBL $\beta$ 12 domains suggested to bind gC1qR (Magallón-Tejada *et al*,  
91 2016). Other B-type *PfEMP1* have a ICAM-1-binding DBL $\beta$ 5 domain (Lennartz *et al*, 2019).  
92 The VAR2CSA *PfEMP1* binds placental CSA and cause pregnancy-associated malaria. The  
93 *var2csa* genes constitute the group E and most *P. falciparum* isolates possess a single or two  
94 gene copies of this inter-strain conserved *var* gene variant. Based on the head structure do-  
95 mains, *PfEMP1* divide into those with DBL $\alpha$ 1 (A-type *PfEMP1*), DBL $\alpha$ 2 (B-type *PfEMP1*) or  
96 DBL $\alpha$ 0 (B- and C-type *PfEMP1*) domains as well as those binding CD36 via CIDR $\alpha$ 2-6 do-  
97 mains (B- and C-type *PfEMP1*) or EPCR via CIDR $\alpha$ 1 (found in A- and B-type *PfEMP1*) (Otto  
98 *et al*, 2019). Accordingly, the head structure confers mutually exclusive binding properties,  
99 either to EPCR, CD36 or to an unknown receptor via the CIDR $\beta$ / $\gamma$ / $\delta$  domain of some A-type  
100 proteins. Some domain sequence variants are found to often co-occur (Otto *et al*, 2019; Berger  
101 *et al*, 2013; Rask *et al*, 2010). For example, one domain cassette (DC), DC8, includes specific  
102 CIDR $\alpha$ 1.1/8 subtypes capable of binding EPCR.

103 Group A *var* gene expression has been associated with severe forms of malaria, whereas mild  
104 malaria may be associated with group C expression (Avril *et al*, 2012; Claessens *et al*, 2012;  
105 Lavstsen *et al*, 2012; Falk *et al*, 2009; Warimwe *et al*, 2009; Kyriacou *et al*, 2006; Rottmann *et*  
106 *al*, 2006; Jensen *et al*, 2004; Kirchgatter & Del Portillo, 2002). Conflicting results were reported  
107 on group B expression during severe disease; however, this is likely explained by the fact that  
108 a subset of B-type *PfEMP1* share EPCR and ICAM-1 receptor-binding phenotypes with A-type  
109 *PfEMP1*. Indeed, consensus from a range of gene expression studies is that severe malaria is  
110 associated with expression of *PfEMP1* with EPCR-binding CIDR  $\alpha$ 1 domains (Jespersen *et al*,  
111 2016; Kessler *et al*, 2017; Storm *et al*, 2019; Shabani *et al*, 2017; Mkumbaye *et al*, 2017;  
112 Bernabeu *et al*, 2016; Magallón-Tejada *et al*, 2016). No other domain has been consistently  
113 associated with severity of disease, but elevated expression of some specific DCs has also  
114 been associated with severe disease, in particular the EPCR-binding DC8 (DBL $\alpha$ 2-CIDR $\alpha$ 1.1-  
115 DBL $\beta$ 12-DBL $\gamma$ 4/6), DC13 (DBL $\alpha$ 1.7-CIDR $\alpha$ 1.4) and DC4 (DBL $\alpha$ 1.4-CIDR $\alpha$ 1.6-DBL $\beta$ 3), but  
116 also the DC5 found in A-type *PfEMP1* (DBL $\gamma$ 12-DBL $\delta$ 5-CIDR $\beta$ 3/5) and DC6 (DBL $\gamma$ 14,-DBL $\zeta$ 5-  
117 DBL $\epsilon$ 4) found in both A- and B-type *PfEMP1* (Bernabeu *et al*, 2016; Magallón-Tejada *et al*,  
118 2016; Berger *et al*, 2013; Avril *et al*, 2013, 2012; Claessens *et al*, 2012; Lavstsen *et al*, 2012).  
119 In this study, we used an RNA-seq based analysis to study gene expression with special em-  
120 phasis on *var* genes in parasites from hospitalized travelers returning from malaria endemic  
121 countries with certified *P. falciparum* infections. Individuals were clustered into i) first-time in-  
122 fected and ii) pre-exposed individuals on the basis of serological data or into iii) severe and iv)  
123 non-severe cases according to medical reports. Our multi-dimensional analysis reveals a clear  
124 association of domain cassettes with EPCR-binding properties with a naïve immune status  
125 and severe malaria, whereas CD36-binding *PfEMP1* proteins and the conserved *var1-3D7*  
126 allele were expressed at higher levels in pre-exposed patients and non-severe cases. Inter-  
127 estingly, circulating parasites from severe cases tended to be younger than parasites from  
128 non-severe cases, indicating that the EPCR-binding phenotype confers more efficient seques-  
129 tration of infected erythrocytes.

## 130 **Results**

131

### 132 ***Cohort characterization***

133 This study is based on a cohort of 32 malaria patients hospitalized in Hamburg, Germany.  
134 Parasitemia, recorded clinical symptoms and patient sub-grouping are summarized in Table  
135 1. For ten patients, the present malaria episode was their first recorded *P. falciparum* infection.  
136 Nine individuals had previously experienced malaria episodes according to the medical re-  
137 ports, whereas malaria exposure was unknown for 13 patients. In order to determine if patients  
138 already had an immune response to *P. falciparum* antigens, indicative of previous exposure to  
139 malaria, plasma samples were analyzed by a Luminex-based assay displaying the antigens

140 AMA1, MSP1 and CSP (Table S1). Immune responses to AMA1 and MSP1 are known to be  
141 long-lasting and seroconversion to AMA1 is assumed to occur after only a single or very few  
142 malaria infections (Drakeley *et al*, 2005). Principal component analysis of the Luminex data  
143 resulted in separation of the patients into two discrete groups corresponding to first-time in-  
144 fected adults ('naïve cluster') and malaria pre-exposed individuals ('pre-exposed cluster') (Fig-  
145 ure 1A). The 13 patients with unknown malaria exposure status could be grouped into either  
146 the naïve or pre-exposed groups defined by the PCA of the antigen reactivity. The only outlier  
147 in the clustering was a 19-year-old patient (#21) from Sudan, who reported several malaria  
148 episodes during childhood, but clustered with the malaria-naïve patients.

149 Plasma samples were further subjected to i) a merozoite-directed antibody-dependent respira-  
150 tory burst (mADRB) assay (Kapelski *et al*, 2014), ii) a PEMS-specific ELISA and iii) a protein  
151 microarray with 228 *P. falciparum* antigens (Borrmann, 2020). Analysis of these serological  
152 assays in relation to the patient clustering confirmed the expected higher and broader antigen  
153 recognition by ELISA, protein microarray, and stronger ability to induce burst of neutrophils by  
154 serum from the group of malaria pre-exposed patients (Figure 1B–D, Table S1). Data from all  
155 the serological assays were next used for an unsupervised random forest machine learning  
156 approach to build models predictive of individual's protective status. This algorithm confirmed  
157 the classification of patient #21 as being non-immune (Figure 1E). The calculated variable  
158 importance highlighted the relevance of the mADRB assay, the ELISA and the Luminex to  
159 allocate patients into cluster (Figure 1F). A multidimensional scaling plot was used to visualize  
160 cluster allocation and patient #26 positioned at the borderline to pre-exposed patients (Figure  
161 1E). The patient was grouped into the naïve cluster in accordance with the Luminex data and  
162 the medical report showing that this patient from Jamaica was infected during his first trip to  
163 Africa.

164 Using protein microarrays, the antibody response against described antigens was analyzed in  
165 detail. As expected, pre-exposed individuals showed significantly elevated IgG antibody re-  
166 sponses against a wide range of parasite antigens, especially typical blood stage markers,  
167 including MSP1, MSP2, MSP4, MSP10, EBA175, ring exported protein 1 (REX1), and AMA1  
168 (Figure 1D, upper panel). Markers for a recent infection, MSP1, MSP4, GLURP and Early  
169 transcribed membrane protein 5 (ETRAMP5) (Van Den Hoogen *et al*, 2019), were significantly  
170 elevated in the pre-exposed individuals in comparison to the defined first-time infected group.  
171 In addition, further members of the ETRAMP family, including ETRAMP10, ETRAMP14,  
172 ETRAMP10.2 and ETRAMP4, and also antibodies against pre-erythrocytic antigens, such as  
173 CSP, STARP and LSA3, were highly elevated. Similar effects were detectable for IgM antibod-  
174 ies; previous exposure to the malaria parasite led to higher antibody levels (Figure 1D, lower  
175 panel).

176 Based on medical reports eight patients from the malaria-naïve group were considered as  
177 more severe cases, having a substantially higher parasitemia and an impaired function of di-  
178 verse organs especially the brain (Table 1). Patient #1 was included into the severe group due  
179 to increasing parasitemia during hospitalization and circulating schizonts indicative of a very  
180 high sequestering parasite biomass associated with severity (Bernabeu *et al*, 2016). The re-  
181 maining 24 cases were summarized into the non-severe malaria group. Comparing the IgG  
182 antibody response of severe and non-severe cases within the previously malaria-naïve group,  
183 elevated antibody levels were detected in the severe subgroup. The highest fold change was  
184 observed in antibodies directed against intracellular proteins, such as DnaJ protein, GTPase-  
185 activating protein or heat shock protein 70 (Figure S1). Interestingly, IgM antibodies against  
186 ETRAMP5 were detectable in the severely infected individuals, suggesting they were infected  
187 for a prolonged period of time compared to the mild malaria population (Helb *et al*, 2015; Van  
188 Den Hoogen *et al*, 2019).

189

### 190 **RNA-seq transcriptomics**

191 Parasites were isolated from the venous blood of all patients for subsequent transcriptional  
192 profiling. Transcriptome libraries were sequenced for all 32 patient samples. The number of  
193 trimmed reads ranged between 29,142,684 and 82,000,248 (median: 41,383,289) within the  
194 individual libraries derived from patients. The proportion of total reads specific for *P. falciparum*  
195 were 87.7% (median; IQR: 76.7–91.3). Lower percentages (12.4% and 15.68%) were obtained  
196 only for patient isolates #1 and #2 (Table S2). These samples were not subjected to globin-  
197 mRNA depletion due to their low RNA content after multiple rounds of DNase treatment. Con-  
198 sequently, less than one million *P. falciparum* reads were obtained for each of these samples.  
199 Therefore, samples from patient #1 and #2 were omitted from assembly due to low coverage,  
200 but included in the differential gene expression analysis.

201 Variation in parasite ages in the different patient samples was analyzed with a mixture model  
202 in accordance to Tonkin-Hill *et al*. (Tonkin-Hill *et al*, 2018) using published data from López-  
203 Barragán *et al*. as a reference (López-Barragán *et al*, 2011). Parasites from first-time infected  
204 and pre-exposed patients revealed no obvious difference in the proportion of the different par-  
205 asite stages (Figure 2A) or in median age (Figure 2B, Table 2). However, a small bias towards  
206 younger parasites in the severe cases was observed with a median age of 8.2 hpi (IQR: 8.0–  
207 9.8) in comparison to 9.8 hpi in the non-severe cases (IQR: 8.2–11.4) (Figure 2C,D, Table 2).  
208 None of the samples revealed high proportions of late trophozoites (all <3%), schizonts (0%)  
209 or gametocytes (all <6%) (Figure 2A, C).

210

211

212

213 ***Differential var gene expression on gene, domain and homology block level***

214 To correlate individual *var* genes with a naïve immune status or disease severity differential  
215 *var* gene expression was analyzed according to Tonkin-Hill *et al.* (Tonkin-Hill *et al.*, 2018). First,  
216 *var* gene assembly was performed by assembling each sample separately, which reduces the  
217 risk for generating false chimeric genes and results in longer contigs compared to a combined  
218 all sample assembly approach. In total, 6,441 contigs with over 500 bp-length were generated  
219 with an N50 of 2,302 bp and a maximum length of 10,412 bp (Data S1). For 5,488 contigs  
220 *PfEMP1* domains could be annotated, the remaining contain only homology blocks defined by  
221 Rask *et al.* (Rask *et al.*, 2010) (Table S3, S4).

222

223 *Var allele level:*

224 A median of 200 contigs (IQR: 137–279) with >500 bp was assembled per sample. Almost half  
225 of the transcripts, for which a *PfEMP1* domain annotation could be made (47.2%: 2,592),  
226 showed >98% nucleotide identity for at least 80% of the length of a *var* gene in the varDB  
227 (Otto, 2019). Moreover, 203 transcripts matched with over 1 kb overlap and 98% identity to  
228 *var* genes from the 15 reference genomes (Otto *et al.*, 2018a) (Table S4). The Salmon RNA-  
229 seq quantification pipeline, which identifies equivalence classes allowing reads to contribute  
230 to the expression estimates of multiple transcripts, was used to estimate expression levels for  
231 each transcript. As a result, it accounts for the redundancy present in our whole set of *var* gene  
232 contigs from all separate sample-specific assemblies. We compared this approach with Corset  
233 which previously has been used to investigate differential expression of *var* genes in severe  
234 malaria and found it gave similar results (see methods) (Tonkin-Hill *et al.*, 2018). Due to the  
235 high diversity in *var* genes both of these approaches are only able to identify significant asso-  
236 ciations between transcripts and phenotypes when there is sufficient similarity within the as-  
237 sociated sequences.

238 By comparing transcripts expressed in first-time infected patients with those from parasites  
239 isolated from pre-exposed patients using the Salmon approach, transcript levels were higher  
240 for twelve and lower for three genes in malaria-naïve hosts (Table 3, Figure 3A, B, Table S6).  
241 Assembled alleles of the conserved subfamilies, *var1*, *var2csa* and *var3*, were also found at  
242 higher frequencies in first-time infected patients. Notably, the *var1-IT* allele was expressed at  
243 higher levels in parasites from first-time infected patients, whereas the *var1-3D7* allele was  
244 expressed at higher levels in parasites from pre-exposed and non-severe patients (Figure 3,  
245 Table 3, 4). This was confirmed by mapping normalized reads from all patients to the *var1-*  
246 *3D7* and *var1-IT* allele forms (Figure S2). Several *var* fragments from B- or C-type *var* genes  
247 were associated with a naïve immune status and three transcripts from A, DC8 and B-type *var*  
248 genes as well as *var2csa* were linked to severe malaria patients (Figure 3, Table 3, 4, Table  
249 S6, S7).

250

251 *Domain level:*

252 Similar to Tonkin-Hill *et al.* (Tonkin-Hill *et al.*, 2018), we quantified domain level expression by  
253 aligning reads to their single best 'hit' in the combined assembly. Domains were identified  
254 within each transcript and the sum of the read counts corresponding to domains with the same  
255 classification was calculated to provide domain level read counts. This showed that different  
256 EPCR-binding CIDR $\alpha$ 1 domain variants and other domains found in DCs with CIDR $\alpha$ 1 do-  
257 mains were expressed at significantly higher levels in first-time infected patients (Table 5, Fig-  
258 ure 4A, B, Table S6). Thus, besides domains from DC8 (DBL $\alpha$ 2, CIDR $\alpha$ 1.1, DBL $\beta$ 12) and  
259 DC13 (DBL $\alpha$ 1.7, CIDR $\alpha$ 1.4), a single domain from DC15 (DBL $\alpha$ 1.2) were increased upon in-  
260 fection of malaria-naïve individuals. The DBL $\alpha$ 1.2 domain was in all of the 32 gene assemblies  
261 with adjacent CIDR domains annotated linked to an EPCR binding CIDR $\alpha$ 1 domain, 56% of  
262 these were a CIDR $\alpha$ 1.5 domain (Table S3, S4). The CIDR $\alpha$ 1.6 domain from DC4 failed to  
263 reach statistical significance ( $p_{adj}=0.07$ ), but was 2.25x times higher expressed in parasites  
264 infecting naïve patients (Table S6). In addition to domains associated with EPCR-binding  
265 *PfEMP1*, parasites from first-time infected patients showed significantly more transcripts en-  
266 coding the CIDR $\delta$ 1 domain of DC16 (DBL $\alpha$ 1.5/6-CIDR $\delta$ 1/2) (Table 5, Figure 4). In general, all  
267 domains associated with the same domain cassettes showed the same trend even if some  
268 domains failed to reach statistical significance (Table S6). Moreover, the DBL $\beta$ 6 domain was  
269 among the top hits of significantly higher expressed domains in the naïve patient cluster. The  
270 DBL $\beta$ 6 is associated with A-type *var* genes and often found adjacent to DC15 and DC16 (Otto  
271 *et al.*, 2019) thus supporting the association of both domain cassettes with a naïve immune  
272 status. Domain types found expressed at lower levels in malaria-naïve included several do-  
273 mains from the *var1-3D7* allele (DBL $\alpha$ 1.4, DBL $\gamma$ 15, DBL $\epsilon$ 5) as well as NTSB and N-terminal  
274 head domains from B- and C-type *PfEMP1* (DBL $\alpha$ 0.13/22/23) with CD36-binding CIDR do-  
275 mains (CIDR $\alpha$ 2.8/9,6) and the C-terminal CIDR $\gamma$ 11 domain (Table 5, Figure 4A, B).

276 When comparing the severe sample set to the non-severe, domains of DC8 (DBL $\alpha$ 2,  
277 CIDR $\alpha$ 1.1, DBL $\beta$ 12) and DC15 (DBL $\alpha$ 1.2) were found associated with severe disease (Table  
278 6, Figure 4C, D, Table S7). The DC16 consists either of a DBL $\alpha$ 1.5 or 1.6 attached to a CIDR $\delta$ 1  
279 domain. The DBL $\alpha$ 1.6 domain was found expressed at higher levels in severe malaria patients  
280 whereas the DBL $\alpha$ 1.5 domain was found to be highly expressed in non-severe cases. The  
281 CIDR $\delta$ 1 domain showed no association with disease group, and the DBL $\alpha$ 1.5 domain type  
282 was generally expressed at a very high level in multiple patient isolates (Table 6, Figure 4). As  
283 observed for pre-exposed individuals, domain types expressed at significantly higher levels in  
284 non-severe cases included the CIDR $\alpha$ 1.3 domain from the *var1-3D7* allele as well as N-termi-  
285 nal head domains from B- and C-type *PfEMP1* with CD36-binding capacity (DBL $\alpha$ 0.23,  
286 CIDR $\alpha$ 2.4/9)(Table 6, Figure 4C, D).



287 Since the subclassification of domains is debatable (Otto *et al*, 2019) and different domain  
288 subclasses confer the same binding phenotype (Lau *et al*, 2015), the domains of the N-terminal  
289 head structure were grouped according to their binding phenotype and the normalized read  
290 counts (TPM) were summarized for each patient (Figure 4E, F). This showed clear differences  
291 were observed for DBL and CIDR domains associated with EPCR- or CD36-binding *PfEMP1*.  
292 As expected, the EPCR-binding phenotype as well as the CIDR $\gamma$ 3 domain were associated  
293 with the naïve and more severe cases, the CD36-binding phenotype with the pre-exposed and  
294 non-severe patients.

295

296 *Homology block level:*

297 Within *PfEMP1* sequences 628 homology blocks were defined (Rask *et al*, 2010) and 613 were  
298 available for download and subsequent analysis from the VARDOM server (Tonkin-Hill *et al*,  
299 2018). Homology block expression levels were obtained by aggregating read counts for each  
300 block after first identifying all occurrences of the block within the combined transcript assembly.  
301 Transcripts encoding blocks number 255, 584 and 614, all typically located within DBL $\beta$  do-  
302 mains of DC8 and CIDR $\alpha$ 1-containing type A *PfEMP1* (Table 7, Figure 5A, B, Table S6), num-  
303 ber 557, located in the inter-domain region between DBL $\beta$  and a DBL $\gamma$  domains (no *PfEMP1*  
304 type association) and block number 155 found in NTSA, were found associated with a naïve  
305 immune status. All these blocks are found in A-, B/A- or B-type genes. Conversely, transcripts  
306 encoding block 88 from DBL $\alpha$ 0 domains and 269 from ATSB were found at lower levels in  
307 malaria-naïve patients indicating that B- and C-type genes are more frequently expressed in  
308 pre-exposed individuals (Table 7, Figure 5A, B). Two homology blocks, 591 and 559, associ-  
309 ated with B-type *PfEMP1* were found to be lower expressed in severe malaria cases (Table 8,  
310 Figure 5C, D, Table S7).

311

312 A summary of the differential *var* gene expression data on the multi-, single- and subdomain  
313 level can be found in Figure 6.

314

### 315 ***Var expression profiling by DBL $\alpha$ -tag sequencing***

316 To supplement our RNA-seq analysis with an orthogonal analysis, we performed DBL $\alpha$ -tag  
317 RT-PCR combined with deep amplicon sequencing on 30 of our patient samples (Lavstsen *et*  
318 *al*, 2012). 851 to 3,368 reads with a median of 1,666 over all samples were analyzed. Identical  
319 DBL $\alpha$ -tag sequences were clustered to generate relative expression levels of each unique *var*  
320 gene tag. Overall, the relative expression levels were similar for sequences found in both the  
321 RNA-seq and the DBL $\alpha$ -tag approach with a mean  $\log_2(\text{DBL}\alpha\text{-PCR}/\text{RNA-seq})$  of 0.4 (CI of  
322 95%: -2.5–3.3) determined by Bland-Altman plotting (Figure S3). In median, 82.6% of all de-  
323 tected individual DBL $\alpha$ -tag sequence clusters with >10 reads (92.9% of all DBL $\alpha$ -tag reads)

324 were found in the RNA-seq approach; and 81.8% of the upper 75<sup>th</sup> percentile of RNA-seq  
325 contigs (with DBL $\alpha$  tag sequences) were found by the DBL $\alpha$ -tag approach.

326 Unique DBL $\alpha$ -tag sequences were searched for near identical sequences among all known  
327 *var* genes on varDB Version V1.1 (Otto, 2019) using Varia tool (Mackenzie *et al*, 2020). Nearly  
328 identical database sequences were found for ~85% of the DBL $\alpha$ -tag sequences allowing pre-  
329 diction of these query gene's domain annotation (Table S10). In line with the RNA-seq data  
330 we found DBL $\alpha$ 1 and DBL $\alpha$ 2 sequences enriched in first-time infected patients and the severe  
331 malaria patients. Conversely, a significant higher proportion of DBL $\alpha$ 0 sequences was found  
332 in pre-exposed individuals and mild cases (Figure 7A, B). No difference was observed in the  
333 number of reads or unique DBL $\alpha$ -tags detected between patient groups, although a trend to-  
334 wards more DBL $\alpha$ -tag clusters could be observed in first-time infected patients and severe  
335 cases (Figure 7A, B). A prediction of the NTS and CIDR domains adjacent to the DBL $\alpha$  domain  
336 showed a significant higher proportion of NTSA in severe cases as well as EPCR-binding  
337 CIDR $\alpha$ 1 domains in first-time infected and severe cases. Expression of *var* genes encoding  
338 NTSB and CIDR $\alpha$ 2-6 domains were significantly associated with in pre-exposed and non-se-  
339 vere cases (Figure 7A, B). Analysis of *var* expression in relation to other domains, showed *var*  
340 transcripts with DBL $\beta$ ,  $\gamma$  and  $\zeta$  or CIDR $\gamma$  domains were more frequently expressed in first-time  
341 infected and severe malaria patients whereas those encoding DBL $\delta$  and CIDR $\beta$  were less  
342 frequent (Figure 7C, D).

343 Assessing expression in relation to domain subtype, CIDR $\alpha$ 1.1/5, DBL $\beta$ 12, DBL $\gamma$ 2/12 and  
344 DBL $\alpha$ 2 were associated with severe malaria whereas CIDR $\alpha$ 3.1/4, DBL $\alpha$ 0.12/16, and DBL $\delta$ 1  
345 associated with non-severe cases (Figure 7D). Overall, these data corroborated the main ob-  
346 servations from the RNA-seq analysis, confirming the association of EPCR-binding *PfEMP1*  
347 variants with development of severe malaria symptoms and CD36-binding *PfEMP1* variants  
348 with establishment of less severe infections in semi-immune individuals.

349

### 350 ***Correlation of var gene expression with antibody levels against head structure CIDR*** 351 ***domains***

352 A detailed analysis of the antibody repertoire of the patients against head structure CIDR do-  
353 mains of *PfEMP1* was carried out using a panel of 19 different EPCR-binding CIDR $\alpha$ 1 do-  
354 mains, 12 CD36-binding CIDR $\alpha$ 2-6 domains, three CIDR $\delta$ 1 domains as well as a single  
355 CIDR $\gamma$ 3 domain (Obeng-Adjei *et al*, 2020; Bachmann *et al*, 2019). Additionally, the minimal  
356 binding region of VAR2CSA was included (Figure 8). Generally, plasma samples from malaria-  
357 naïve as well as severe cases showed lower MFI values for all antigens tested in comparison  
358 to samples from pre-exposed or non-severe cases (Figure 8A, B). Mann-Whitney U testing  
359 revealed significant differences for CIDR $\alpha$ 2-6, CIDR $\delta$ 1 and CIDR $\gamma$ 3, but not for EPCR-binding  
360 CIDR $\alpha$ 1 domains.

361 Another way of analyzing the samples is to take the average MFI from an unrelated control  
362 cohort plus two standard deviations as a cut off for seropositivity for calculation of the coverage  
363 of antigen recognition (Cham *et al*, 2010). By doing so, almost half of the tested antigens were  
364 recognized by pre-exposed (median: 46.3%) and non-severe patients (median: 45.1%), but  
365 only 1/4 of the antigens were recognized by first-time infected patients (median: 24.4%) and  
366 1/20 by severely ill patients (median: 4.9%). Apart from controls, antigens recognized by over  
367 60% of the pre-exposed and/or non-severe patient sera were i) four CIDR $\alpha$ 1 domains capable  
368 of EPCR-binding (CIDR $\alpha$ 1.5, CIDR $\alpha$ 1.6, CIDR $\alpha$ 1.7 and the DC8 domain CIDR $\alpha$ 1.8), ii) two  
369 CD36-binding CIDR $\alpha$  domains (CIDR $\alpha$ 2.10, CIDR $\alpha$ 3.1) and iii) two CIDR domains with un-  
370 known binding phenotype (CIDR $\delta$ 1 and CIDR $\gamma$ 3) (Figure 8C, Table S1).

371

### 372 ***Differential gene expression analysis of core genes***

373 Global gene expression analysis (Tonkin-Hill *et al*, 2018) identified 420 genes to be higher and  
374 236 to be lower expressed in first-time infected patients, together corresponding to 11.3% of  
375 all *P. falciparum* genes (Table S9). Analysis of gene set enrichment analysis (GSEA) of GO  
376 terms and KEGG pathways showed a significantly lower expression level for genes with sev-  
377 eral GO terms involved in antigenic variation and host cell remodeling in first-time infected  
378 patients (Figure 9A, Table S9). These analysis results may be distorted, since variant surface  
379 antigens like *var*, *rif*, *stevor*, *surf* and *pfmc-2tm* are largely clone-specific and reads from the  
380 clinical isolates would map only to homologous regions in 3D7 genes, which may actually not  
381 be present in the clinical isolate. Therefore, we manually screened differentially expressed  
382 genes known to be involved in *var* gene regulation or correct display of *PfEMP1* at the host  
383 cell surface (Table S9). On single gene level, genes encoding the Maurer's cleft proteins  
384 MAHRP1 and REX2 (Spycher *et al*, 2003; Spielmann *et al*, 2006), REX4 and MSRP7 located  
385 within the host cell cytosol (Spielmann *et al*, 2006; Heiber *et al*, 2013), the erythrocyte mem-  
386 brane-located glycophorin binding protein GBP130 (Perkins, 1988) as well as Sir2a and SWIB  
387 known to be involved in *var* gene regulation (Tonkin *et al*, 2009; Wang & Zhang, 2020) were  
388 expressed at significantly lower levels in malaria-naïve patients. MAHRP1 is essential for  
389 translocation of *PfEMP1* to the surface of infected erythrocytes (Spycher *et al*, 2006, 2008)  
390 and was suggested to be part of the *PfEMP1* loading hub (McHugh *et al*, 2020); on the con-  
391 trary, deletion of the REX2 and REX4-encoding genes via chromosome breakage was asso-  
392 ciated with the loss of cytoadherence, but not with aberrant trafficking of *PfEMP1* (Nacer *et al*,  
393 2011; Chaiyaroj *et al*, 1994; Day *et al*, 1993). Genetic ablation of GBP130 increased the mem-  
394 brane rigidity of infected erythrocytes without negative impact on cytoadherence under flow  
395 conditions (Maier *et al*, 2008).

396 In contrast, several PHIST encoding genes were found expressed at higher levels in first-time  
397 infected patients including the lysine-rich membrane-associated PHISTb protein (LyMP),

398 previously reported to interact with the ATS domain (Oberli *et al*, 2014, 2016). Furthermore,  
399 the exported proteins FIKK9.6 (Nunes *et al*, 2007), MSRP5 and MSRP6 (Heiber *et al*, 2013)  
400 as well as PF3D7\_0721100 showed a significant increase compared to pre-exposed patients.  
401 The conserved *Plasmodium* protein of unknown function PF3D7\_0721100 detected in deter-  
402 gent-resistant fractions of the red blood cell membrane (Yam *et al*, 2013) was also found in a  
403 putative *PfEMP1* unloading hub together with REX1, MAHRP2, PTP5 and PF3D7\_1353100  
404 using protein interaction network analysis (McHugh *et al*, 2020). On the level of *var* gene ex-  
405 pression regulation, the chromatin-associated exoribonuclease *PfRNase II* (PF3D7\_0906000)  
406 was increased in first-time infected patients (Zhang *et al*, 2014).

407 Most of the associations with a naïve immune status were also observed in the comparison of  
408 severe versus non-severe cases (Table S10). Significantly higher expresses genes included  
409 several PHIST and HYP proteins, MSRP5, *PfRNase II*, PF3D7\_0721100 and, additionally,  
410 SET1, PTP1, SBP1, PTP5 and PF3D7\_1353100. Overall, three proteins defined by McHugh  
411 *et al.* as members of the *PfEMP1* unloading hub were significantly higher expressed in severe  
412 malaria cases (PTP5, PF3D7\_0721100 and PF3D7\_1353100) and all remaining proteins  
413 showed the same trend for upregulation (PIESP2, PfJ23, REX1 and MAHRP2) (McHugh *et al*,  
414 2020).

415 Furthermore, the KEGG pathway 03410 'base excision repair' facilitating the maintenance of  
416 the genome integrity by repairing small bases lesions in the DNA was expressed at significantly  
417 higher levels in first-time infected patient samples (Figure 9A, Figure S4). In total, six out of 15  
418 *P. falciparum* genes included into the KEGG pathway were found to be statistically significant  
419 enriched upon first-time infection, more precisely the putative endonuclease III  
420 (PF3D7\_0614800) from the short-patch pathway and the putative A-/G-specific adenine gly-  
421 cosylase (PF3D7\_1129500), the putative apurinic/aprimidinic endonuclease Apn1  
422 (PF3D7\_1332600), the proliferating cell nuclear antigens 1 (PF3D7\_1361900), the catalytic  
423 (PF3D7\_1017000) and small (PF3D7\_0308000) subunits from the DNA polymerase delta from  
424 the long-patch pathway (Figure 9B).

425

## 426 Discussion

427

428 Analysis of blood samples from travelers returning to Germany and hospitalized with *P. faldi-*  
429 *parum* malaria for the first time, allows studies of parasites' development and gene expression  
430 unaffected by host immune responses elicited in previous Plasmodia infections. Here we an-  
431 alyzed gene expression in 32 such patients using direct *ex vivo* RNA-seq to exclude transcrip-  
432 tional adaptation through *in vitro* cultivation. Most of these returning travelers studied were  
433 infected with a single or very few parasite genotypes, which likely simplified the analysis of *var*  
434 gene expression due to the restricted genomic repertoire. We were able to distinguish

435 retrospectively between first-time infected and pre-exposed patients by medical history and  
436 assessing the presence of antibodies to *P. falciparum* antigens. Eight out of 15 first-time in-  
437 fected patients were classified as severe malaria cases due to impaired organ function accord-  
438 ing to their medical reports. Despite the relatively low number of patient samples, the RNA-  
439 seq approach confirmed previously reported associations between transcripts encoding type  
440 A and B EPCR-binding *PfEMP1* and infections in naïve hosts and disease severity (Table S6,  
441 S7)(Duffy *et al*, 2019; Tonkin-Hill *et al*, 2018; Kessler *et al*, 2017; Bernabeu *et al*, 2016;  
442 Jespersen *et al*, 2016; Lavstsen *et al*, 2012).

443 Overall, there was a high degree of consensus between analyses of the *var* transcriptome data  
444 in relation to the different levels of *PfEMP1* domain annotation. Stratifying *var* gene expression  
445 according to different main and subtype of DBL and CIDR domains, showed only A- and DC8-  
446 type *PfEMP1* domains, and predominantly those linked to EPCR-binding *PfEMP1*, to be asso-  
447 ciated with first-time infections. Conversely, domains typical for CD36-binding *PfEMP1* pro-  
448 teins was found at higher levels in malaria-experienced patients. Specifically, expression of  
449 *PfEMP1* domains included in DC8, DC13 and DC15 as well as all EPCR-binding CIDR $\alpha$ 1 do-  
450 mains were associated with first time infections, whereas DBL $\alpha$ 0 and CD36-binding CIDR $\alpha$ 2-  
451 6 domains were linked to pre-exposed individuals. These differences were in large due to the  
452 differential expression between the first-time infected patients with more severe symptoms and  
453 patients with non-severe malaria. Here, domains of DC8 and DC15 as well as all DBL $\alpha$ 1/2 and  
454 CIDR $\alpha$ 1 domains were associated with severe symptoms, while NTSB, DBL $\alpha$ 0, CIDR $\alpha$ 2-6 do-  
455 mains including specific subsets of CIDR $\alpha$ 2 were linked to non-severe symptoms. These con-  
456 clusions were closely mirrored in the DBL $\alpha$  tag analysis, and was further corroborated by the  
457 differential RNA-seq expression stratified according to the smaller homology blocks, which  
458 identified mainly homology blocks of DBL $\beta$ 1, 3, 5 and 12 DBL $\beta$  domains to be associated with  
459 first- time infected patients. These DBL $\beta$  domains are parts of DCs associated with EPCR-  
460 binding, so it is hard to distinguish between co-occurring domains and clear associations.  
461 DBL $\beta$  domains do not segregate distinctly by sequence similarity into groups reflecting their  
462 observed binding to ICAM-1 and gC1qR, (Otto *et al*, 2019). Best defined is ICAM-1 binding  
463 DBL $\beta$ 5 domains found in CD36-binding B-type *PfEMP1* (Janes *et al*, 2011; Lennartz *et al*,  
464 2019) and ICAM1-binding of and DBL $\beta$ 1 and 3 domains found in EPCR-binding type-A  
465 *PfEMP1* (Lennartz *et al*, 2017). The relative importance of ICAM1 binding to CD36 or EPCR  
466 binding *PfEMP1* is not well understood, but ICAM-1-binding is believed to contribute to disease  
467 severity by either tethering endothelial binding (Bernabeu *et al*, 2019) or initiating or securing  
468 endothelial sequestration on inflamed endothelium, which is likely to shed EPCR (Jensen *et*  
469 *al*, 2020)

470 In addition, three other A-type-associated domains, CIDR $\gamma$ 3, CIDR $\delta$  from the DC16 and  
471 DBL $\beta$ 9 from DC5, were found associated with first-time infected patients. DC5 could have

472 been detected due to its presence C-terminally to some EPCR-binding *PfEMP1*. However, the  
473 CIDR $\delta$  domain of DC16 (DBL $\alpha$ 1.5/6-CIDR $\delta$ 1/2) constitute a different subset of A-type *PfEMP1*,  
474 which together with A-type *PfEMP1* with CIDR $\beta$ 2 (found in DC11) or CIDR $\gamma$ 3 domains may be  
475 associated with rosetting (Carlson *et al*, 1990; Ghumra *et al*, 2012). Direct evidence that any  
476 of these CIDR domains have intrinsic rosetting properties is lacking (Rowe *et al*, 2002). Rather,  
477 their association with rosetting may be related to their tandem expression with DBL $\alpha$ 1 at the  
478 N-terminal head (Ghumra *et al*, 2012). The CIDR $\delta$  domain was not associated with severe  
479 malaria patient group and the two different DC16-associated DBL $\alpha$ 1 domains were found as-  
480 sociated with severe and non-severe malaria, respectively. However, CIDR $\gamma$ 3 expression was  
481 low, but it was found at higher levels in severe malaria patients.

482 The DC16 group A signature was not associated with severe disease outcome in previous  
483 DBL $\alpha$ -tag studies or qPCR studies by Lavstsen *et al*. (Lavstsen *et al*, 2012) and Bernabeu *et*  
484 *al*. (Bernabeu *et al*, 2016), but DBL $\alpha$ 1.5/6 and CIDR $\delta$  of DC16 were enriched in cerebral ma-  
485 laria cases with retinopathy in the study of Shabani *et al*. (Shabani *et al*, 2017) and Kessler *et*  
486 *al*. (Kessler *et al*, 2017) using the same qPCR primer set. Also, association of DC11 with se-  
487 vere malaria in Indonesia was found using the same RNA-seq approach as used here (Tonkin-  
488 Hill *et al*, 2018). Rosetting is thought to enhance microvascular obstruction but the role of ro-  
489 setting in severe malaria pathogenesis remains unclear (McQuaid & Rowe, 2020). Together  
490 with previous observations, our data suggest that pediatric cerebral malaria infections are dom-  
491 inated by the expansion of parasites expressing EPCR-binding domains accompanied by par-  
492 asites expressing other group A *PfEMP1*, possibly rosetting variants.

493 To the best of our knowledge, this study is the first description of expression differences be-  
494 tween the two *var1* alleles, 3D7 and IT. At the transcript level the *var1-IT* allele was found to  
495 be enriched in parasites from first-time infected patients; conversely, several transcripts cov-  
496 ering almost the full-length protein and in total half of the domains from the *var1-3D7* allele  
497 were increased in pre-exposed and non-severely ill patients. Expression of the *var1* gene was  
498 previously observed to be elevated in malaria cases imported to France with an uncomplicated  
499 disease phenotype (Argy *et al*, 2017). In general, the *var1* subfamily is ubiquitously transcribed  
500 (Winter *et al*, 2003; Duffy *et al*, 2006), atypically late in the cell cycle after transcription of *var*  
501 genes encoding the adhesion phenotype (Kyes *et al*, 2003; Duffy *et al*, 2002) and is annotated  
502 as a pseudogene in 3D7 due to its premature truncation. Similarly, numerous isolates display  
503 frame-shift mutations often in exon 2 in the full gene sequences (Rask *et al*, 2010). However,  
504 none of these studies addressed differences in the two *var1*-alleles just recently described by  
505 comparing *var* gene sequences from 714 *P. falciparum* genomes (Otto *et al*, 2019) and to date  
506 it is unclear if both allele forms fulfill the same function or harbor the same characteristics  
507 previously described. Overall, the *var1* gene – and the first 3.2 kb of the 3D7 allele in particular  
508 – seems to be under high evolutionary pressure (Otto *et al*, 2019) and the bi-allelic pattern can

509 be traced back before the split of *P. reichenowi* from *P. praefalciparum* and *P. falciparum* (Otto  
510 *et al*, 2018b). Our data indicate that the two alleles, 3D7 and IT, may have different roles during  
511 disease, however, this remains to be determined in future studies.

512 In general, data from immunologically naïve malaria patients are rather limited, restricting our  
513 comparison mainly to the severe phenotype described in numerous previous studies. How-  
514 ever, a recent study explored the *var* gene expression during infancy in Kenyan children and  
515 could correlate the waning of maternal antibodies with increasing transcription of DC8, DC13  
516 and A-type *var* genes in general. After the first year of life the amount of these transcripts  
517 decreases with age and acquired immunity (Kivisi *et al*, 2019). A high expression of A-type *var*  
518 genes in naïve malaria cases imported to France and an association of DC4, 8 and 13 with  
519 disease severity has also been reported (Argy *et al*, 2017). Both qPCR studies are in agree-  
520 ment with the RNA-seq data from our cohort of immunologically malaria-naïve adults, but we  
521 could extend the list with DC15 and DC16, that are presumably involved in binding of infected  
522 erythrocytes to EPCR and that may also mediate binding to uninfected red blood cells by ro-  
523 setting.

524 Overall, most studies – including this one – are looking at differentially expressed genes. From  
525 CHMI studies we already know that at the early onset of infection the parasite population ex-  
526 presses a wide range of different *var* genes located in the subtelomeric regions (A- and mainly  
527 B-type *var* genes). Since B-types are also highly expressed in pre-exposed cases domains of  
528 these *PfEMP1*s may be missing in pattern of first-time infected patients. Furthermore, EPCR-  
529 and ICAM-1 binding and rosetting-mediating variants may confer a parasite growth advantage  
530 in malaria naïve hosts, and in some circumstances increase the risk for severe malaria, so that  
531 a selection towards these variants may have been already occurred in our patients. This would  
532 fit nicely to the observation that the severe patients within the malaria-naïve patient group  
533 seem to be infected for a longer time period. Moreover, patients with preformed immunity re-  
534 cognize several CIDR $\alpha$ 1 domains capable of EPCR-binding as well as the two atypical CIDR  
535 head domains CIDR $\delta$ 1 and CIDR $\gamma$ 3 more frequently than CIDR $\alpha$ 2-6 domains with CD36-  
536 binding affinity. This is in agreement with studies from malaria endemic setting indicating that  
537 IgG against EPCR-binding domains were acquired first followed by domains with unknown  
538 binding phenotypes associated with rosetting and CD36-binding domains. Resulting in the ear-  
539 lier acquisition of antibodies against DBL and CIDR domains of group A and B/A, associated  
540 with EPCR binding, than against B- and C-type domains (Obeng-Adjei *et al*, 2020; Cham *et al*,  
541 2009, 2010; Turner *et al*, 2015).

542 Genes involved in *PfEMP1* biology were found to be expressed at lower levels in severe ma-  
543 laria patients (Tonkin-Hill *et al*, 2018). In concordance, GO term analysis revealed a general  
544 lower expression of genes involved in antigenic variation or host cell remodeling during first-  
545 time infection and severe disease, but the expression analysis of clonally variant genes is

546 complicated by the existence of multiple diverse families that have strain specific members  
547 leading to mis-mapping of reads to genes present in the 3D7 strain that do not exist in the  
548 clinical samples analyzed. Therefore, manually selected genes encoding regulators of *var*  
549 gene expression and *PfEMP1* trafficking were additionally inspected for association with a na-  
550 tive immune status and severity. The NAD<sup>+</sup>-dependent histone deacetylases Sir2a and Sir2b  
551 remove acetyl groups from the N-terminal tails of histone 3 and 4 and are therefore considered  
552 as *var* silencing factors. Sir2b regulates the most telomeric B-type *var* genes, Sir2a-regulated  
553 *var* genes are of type A, C and E by deacetylation of H3K9ac, H3K14ac and H4K16ac (Duffy  
554 *et al*, 2014; Tonkin *et al*, 2009). A down-regulation of Sir2a indicates an elevated expression  
555 of these *var* types, which is in concordance with our data on A- and E-type *var* genes found  
556 more frequently in first-time infected patients. Contradictory to a previous study showing that  
557 the exoribonuclease *PfRNase II* controls the silencing of A-type *var* genes and was negatively  
558 associated with *var-A* expression in severe malaria, *PfRNase II* expression was significantly  
559 enriched in first-time infected and severely ill patients (Zhang *et al*, 2014). Our results also  
560 contradicted down-regulation of A- and partially B-type *var* genes by conditional knockout of  
561 SWIB (Wang & Zhang, 2020). However, high expression levels of the *var1-3D7* allele, also an  
562 A-type *var* gene, in pre-exposed and non-severe cases may be responsible for these opposite  
563 results. On the other hand, expression of genes encoding other factors was also found inverted  
564 in comparison to other studies. GBP was found to be highly enriched in severe relative to  
565 uncomplicated malaria cases (Lee *et al*, 2018), but is significantly lower expressed in first-time  
566 infected patients and has the same trend in severe cases in this study. Contrarily, LyMP, SBP1  
567 and SET proteins were expressed on a significantly lower level in severe cases in the study of  
568 Tonkin-Hill *et al*. (Tonkin-Hill *et al*, 2018), but elevated levels were found in our study.  
569 A recent study showed that parasites isolated from symptomatic infections were on average  
570 younger than blood-circulating parasites from asymptomatic infections presumably due to a  
571 more efficient sequestration of parasites in the symptomatic cases (Andrade *et al*, 2020).  
572 Based on this and our findings we hypothesize that parasites circulating in severely ill patients  
573 are younger due to the expression of EPCR-/ICAM-1-binding *PfEMP1* variants, whereas par-  
574 asites in non-severe patients may circulate longer due to their expression of *PfEMP1* binding  
575 to CD36. Although affinity of the CIDR domains to each of these receptors was shown to be  
576 similar with median K<sub>d</sub> values of 12 nM for CD36 (Hsieh *et al*, 2016) and 16.5 nM for EPCR  
577 (Lau *et al*, 2015), recent papers describe a rolling binding phenotype of infected red blood cells  
578 over CD36 and a static binding for EPCR and ICAM-1 under flow conditions (Lubiana *et al*,  
579 2020; Bernabeu *et al*, 2019; Dasanna *et al*, 2017; Herricks *et al*, 2013). Due to their biconcave  
580 shape trophozoites seem to roll faster but less stable by flipping over CD36-expressing cells,  
581 whereas schizonts roll over longer distances at different shear stresses applied. This might  
582 explain why young trophozoites are found in blood samples from non-severe cases, but not



583 older trophozoites or schizont stages as also previously described (Tonkin-Hill *et al*, 2018).  
584 The parasite population in first-time infected individuals may have broader binding potential  
585 after liver release as there is no pre-existing immunity to clear previously experienced *PfEMP1*  
586 variants, but during the blood stage infection variants with high-affinity binding to EPCR and  
587 ICAM-1 binding are selected which may lead to severe symptoms. This hypothesis is sup-  
588 ported by (1) the difference in parasite age between severe and non-severe malaria cases  
589 calculated by matching RNA-seq data to a reference data set (López-Barragán *et al*, 2011).  
590 (2) This correlates with a higher *var1* expression in parasite from non-severe and pre-exposed  
591 patients, which expression is not suppressed in trophozoites (Kyes *et al*, 2003). (3) The ex-  
592 pression of EPCR- & ICAM-1-binding variants in parasites from severe and first-time infected  
593 patients is significantly increased, conversely transcripts of CD36-binding variants are found  
594 more frequently in parasites from non-severe and pre-exposed patients. For parasites survival  
595 and transmission, it may be highly beneficial to have more less virulent *PfEMP1* variants able  
596 to bind CD36. This interaction may not, or is less likely to, lead to obstruction of blood flow,  
597 inflammation and organ failure at least of the brain, where CD36 is nearly absent.

598

## 599 **Material and methods**

600

### 601 ***Ethics statement***

602 The study was conducted according to the principles of the Declaration of Helsinki in its 6th  
603 revision as well as International Conference on Harmonization–Good Clinical Practice (ICH-  
604 GCP) guidelines. All patients, aged 19 to 70 years, provided written informed consent for this  
605 study, which was approved by the Ethical Review Board of the Medical Association of Ham-  
606 burg (reference number PV3828).

607

### 608 ***Blood sampling and processing***

609 Blood samples from *P. falciparum* malaria patients collected either at the diagnostic unit of the  
610 Bernhard Nocht Institute for Tropical Medicine, Hamburg, Germany, or at the Medical Clinic  
611 and Polyclinic of University Clinic Hamburg-Eppendorf, Hamburg, Germany, were used in this  
612 study. EDTA blood samples (1–30 mL) were obtained from the patients. The plasma was sep-  
613 arated by centrifugation and immediately stored at -20°C. Erythrocytes were isolated by Ficoll  
614 gradient centrifugation followed by filtration through Plasmodipur filters (EuroProxima) to clear  
615 the remaining granulocytes. An aliquot of red blood cells (about 50–100 µl) was separated and  
616 further processed for gDNA purification. At least 400 µl of purified erythrocytes were rapidly  
617 lysed in 5 volumes pre-warmed TRIzol (ThermoFisher Scientific) and stored at -80°C until fur-  
618 ther processing (*ex vivo* samples, n = 32).

619

620 **Serological assays**

621 *Luminex assay*

622 The Luminex assay was conducted as previously described using the same plex of antigens  
623 tested (Bachmann *et al*, 2019). In brief, plasma samples from patients were screened for indi-  
624 vidual recognition of 19 different CIDR $\alpha$ 1, 12 CIDR $\alpha$ 2–6, three CIDR $\delta$ 1 domains and a single  
625 CIDR $\gamma$ 3 domain as well as of the controls AMA1, MSP1, CSP, VAR2CSA (VAR2), tetanus  
626 toxin (TetTox) and BSA. The data are shown as mean fluorescence intensities (MFI) allowing  
627 comparison between different plasma samples, but not between different antigens. Alterna-  
628 tively, the breadth of antibody recognition (%) was calculated using MFI values from Danish  
629 controls plus two standard deviations (SD) as cut off.

630

631 *Merozoite-triggered antibody-dependent respiratory burst (mADRB)*

632 The assay to determine the mADRB activity of the patients was set up as described before  
633 (Kapelski *et al*, 2014). Polymorphonuclear neutrophil granulocytes (PMNs) from one healthy  
634 volunteer were isolated by a combination of dextran-sedimentation and Ficoll-gradient centrif-  
635 ugation. Meanwhile,  $1.25 \times 10^6$  merozoites were incubated with 50  $\mu$ l of 1:5 diluted plasma  
636 (decomplemented) for 2 h. The opsonized merozoites were pelleted (20 min, 1500 g), re-sus-  
637 pended in 25  $\mu$ l HBSS and then transferred to a previously blocked well of an opaque 96 well  
638 high-binding plate (Greiner Bio-One). Chemiluminescence was detected in HBSS using 83.3  
639  $\mu$ M luminol and  $1.5 \times 10^5$  PMNs at 37°C for 1 h to characterize the PMN response, with read-  
640 ings taken at 2 min intervals using a multiplate reader (CLARIOstar, BMG Labtech). PMNs  
641 were added in the dark, immediately before readings were initiated.

642

643 *ELISA*

644 Antibody reactivity against parasitophorous vacuolar membrane-enclosed merozoite struc-  
645 tures (PEMS) was estimated by ELISA. PEMS were isolated as described before (Llewellyn *et*  
646 *al*, 2015). For the ELISA,  $0.625 \times 10^5$  PEMS were coated on the ELISA plates in PBS. Plates  
647 were blocked using 1% Casein (Thermo Scientific #37528) and incubated for 2 h at 37°C. After  
648 washing using PBS/0.1% Tween, plasma samples were added at two-fold dilutions of 1:200 to  
649 1:12800 in PBS/0.1% Casein. The samples were incubated for 2 h at room temperature (RT).  
650 IgG was quantified using HRP-conjugated goat anti-human IgG at a dilution of 1:20,000 and  
651 incubated for 1 h. For the color reaction, 50  $\mu$ l of TMB substrate was used and stopped by  
652 adding 1 M HCl after 20 min. Absorbance was quantified at 450 nm using a multiplate reader  
653 (CLARIOstar, BMG Labtech).

654

655

656

657 *Protein microarray*

658 Microarrays were produced at the University of California Irvine, Irvine, California, USA  
659 (Doolan *et al*, 2008). In total, 262 *P. falciparum* proteins representing 228 unique antigens  
660 were expressed using an *E. coli* lysate *in vitro* expression system and spotted on a 16-pad  
661 ONCYTE AVID slide. The selected *P. falciparum* antigens are known to frequently provide a  
662 positive signal when tested with sera from individuals with sterile and naturally acquired im-  
663 munity against the parasite (Obiero *et al*, 2019; Dent *et al*, 2016; Doolan *et al*, 2008; Felgner  
664 *et al*, 2013). For the detection of binding antibodies, secondary IgG antibody (goat anti-human  
665 IgG QDot™800, Grace Bio-Labs #110635), secondary IgM antibody (biotin-SP-conjugated  
666 goat anti-human IgM, Jackson ImmunoResearch #109-065-043) and Qdot™585 Streptavidin  
667 Conjugate (Invitrogen #Q10111MP) were used (Taghavian *et al*, 2018).

668 Study serum samples as well as the European control serum were diluted 1:50 in 0.05X Super  
669 G Blocking Buffer (Grace Bio-Labs, Inc.) containing 10% *E. coli* lysate (GenScript, Piscataway,  
670 NJ) and incubated for 30 minutes on a shaker at RT. Meanwhile, microarray slides were rehy-  
671 drated using 0.05X Super G Blocking buffer at RT. Rehydration buffer was subsequently re-  
672 moved and samples added onto the slides. Arrays were incubated overnight at 4°C on a shaker  
673 (180 rpm). Serum samples were removed the following day and microarrays were washed  
674 using 1X TBST buffer (Grace Bio-Labs, Inc.). Secondary antibodies were then applied at a  
675 dilution of 1:200 and incubated for two hours at RT on the shaker, followed by another washing  
676 step and a one-hour incubation in a 1:250 dilution of Qdot™585 Streptavidin Conjugate. After  
677 a final washing step, slides were dried by centrifugation at 500 g for 10 minutes. Slide images  
678 were taken using the ArrayCAM® Imaging System (Grace Bio-Labs) and the ArrayCAM 400-  
679 S Microarray Imager Software.

680 Microarray data were analyzed in R statistical software package version 3.6.2. All images were  
681 manually checked for any noise signal. Each antigen spot signal was corrected for local back-  
682 ground reactivity by applying a normal-exponential convolution model (McGee & Chen, 2006)  
683 using the RMA-75 algorithm for parameter estimation (available in the LIMMA package  
684 v3.28.14) (Silver *et al*, 2009). Data was log<sub>2</sub>-transformed and further normalized by subtraction  
685 of the median signal intensity of mock expression spots on the particular array to correct for  
686 background activity of antibodies binding to *E. coli* lysate. After log<sub>2</sub> transformation data ap-  
687 proached normal distribution. Differential antibody levels (protein array signal) in the different  
688 patient groups were determined by Welch-corrected Student's t-test. Antigens with p<0.05 and  
689 a fold change >2 of mean signal intensities were defined as differentially recognized between  
690 the tested sample groups. Volcano plots were generated using the PAA package (Turewicz *et al*,  
691 2016) and GraphPad Prism 8. Individual antibody breadths were defined as number of  
692 seropositive features with signal intensities exceeding an antigen-specific threshold set at six  
693 standard deviations above the mean intensity in negative control samples.

694  
695  
696  
697  
698  
699  
700  
701  
702  
703  
704  
705  
706  
707  
708  
709  
710  
711  
712  
713  
714  
715  
716  
717  
718  
719  
720  
721  
722  
723  
724  
725  
726  
727  
728  
729  
730

#### *Unsupervised random forest model*

An unsupervised random forest (RF) model, a machine learning method based on multiple classification and regression trees, was calculated to estimate proximity between patients. Variable importance was calculated, which shows the decrease in prediction accuracy if values of a variable are permuted randomly. The *k*-medoids clustering method was applied on the proximity matrix to group patients according to their serological profile. Input data for random forest were Luminex measurements for MSP1, AMA1 and CSP reduced by principal component analysis (PCA; first principal component selected), mADRB, ELISA, and antibody breadth of IgG and IgM determined by protein microarray were used to fit the RF model. Multidimensional scaling was used to display patient cluster. All analyses were done with R (4.02) using the packages randomForest (4.6-14) to run RF models and cluster (2.1.0) for *k*-medoids clustering.

#### **DNA purification and MSP1 genotyping**

Genomic DNA was isolated using the QIAamp DNA Mini Kit (Qiagen) according to the manufacturer's protocol. To assess the number of *P. falciparum* genotypes present in the patient isolates, MSP1 genotyping was carried out as described elsewhere (Robert *et al*, 1996).

#### **RNA extraction, RNA-seq library preparation, and sequencing**

TRIzol samples were thawed, mixed rigorously with 0.2 volumes of cold chloroform and incubated for 3 min at room temperature. After centrifugation for 30 min at 4°C and maximum speed, the supernatant was carefully transferred to a new tube and mixed with an equal volume of 70% ethanol. Afterwards the manufacturer's instruction from the RNeasy MinElute Kit (Qiagen) were followed with DNase digestion (DNase I, Qiagen) for 30 min on column. Elution of the RNA was carried out in 14 µl. Human globin mRNA was depleted from all samples except from samples #1 and #2 using the GLOBINclear kit (ThermoFisher Scientific). The quality of the RNA was assessed using the Agilent 6000 Pico kit with the Bioanalyzer 2100 (Agilent) (Figure S5), the RNA quantity using the Qubit RNA HA assay kit and a Qubit 3.0 fluorometer (ThermoFisher Scientific). Upon arrival at BGI Genomics Co. (Hong Kong), the RNA quality of each sample was double-checked before sequencing. The median RIN value over all *ex vivo* samples was 6.75 (IQR: 5.93–7.40) (Figure S5), although this measurement has only limited significance for samples containing RNA of two species. Customized library construction in accordance to Tonkin-Hill *et al*. (Tonkin-Hill *et al*, 2018) including amplification with KAPA polymerase and HiSeq 2500 100 bp paired-end sequencing was also performed by BGI Genomics Co. (Hong Kong).

731 ***RNA-seq read mapping and data analysis***

732 *Var gene assembly*

733 *Var* genes were assembled using the pipeline described in Tonkin-Hill *et al.* (Tonkin-Hill *et al.*,  
734 2018). Briefly, non-*var* reads were first filtered out by removing reads that aligned to *H. sapi-*  
735 *ens*, *P. vivax* or non-*var P. falciparum*. Assembly of the remaining reads was then performed  
736 using a pipeline combining SOAPdenovo-Trans and Cap3 (Xie *et al.*, 2014; Huang & Madan,  
737 1999; Liao *et al.*, 2013). Finally, contaminants were removed from the resulting contigs and  
738 they were then translated into the correct reading frame. Reads were mapped to the contigs  
739 using BWA-MEM (Li, 2013) and RPKM values were calculated for each *var* transcript to com-  
740 pare individual transcript levels in each patient. Although transcripts might be differentially cov-  
741 ered by RNA-seq due to their variable GC content, this seems not to be an issue between *var*  
742 genes (Tonkin-Hill *et al.*, 2018).

743

744 *Var transcript differential expression*

745 Expression for the assembled *var* genes was quantified using Salmon v0.14.1 (Patro *et al.*,  
746 2017) for 531 transcripts with five read counts in at least 3 patient isolates. Both the naïve and  
747 pre-exposed groups as well as the severe and non-severe groups were compared. The com-  
748 bined set of all *de novo* assembled transcripts was used as a reference in addition to the coding  
749 regions of the 3D7 reference genome. The Salmon algorithm identifies equivalence sets be-  
750 tween transcripts allowing a single read to support the expression of multiple transcripts. This  
751 enables it to account for the redundancy present in our dataset. To confirm the suitability of  
752 this approach we also ran the Corset algorithm as used in Tonkin-Hill *et al.*, (Tonkin-Hill *et al.*,  
753 2018; Davidson & Oshlack, 2014). Unlike Salmon which attempts to quantify the expression  
754 of transcripts themselves, Corset copes with the redundancy present in *de novo* transcriptome  
755 assemblies by clustering similar transcripts together using both the sequence identify of the  
756 transcripts as well as multi-mapping read alignments. Of the transcripts identified using the  
757 Salmon analysis 5/15 in the naïve versus pre-exposed and 4/13 in the severe versus non-  
758 severe were identified in the significant clusters produced using Corset. As the two algorithms  
759 take very different approaches and as Salmon is quantifying transcripts rather than the ‘gene’  
760 like clusters of Corset this represents a fairly reasonable level of concordance between the  
761 two methods. In both the Salmon and Corset pipelines differential expression analysis of the  
762 resulting *var* expression values was performed using DESeq2 v1.26 (Love *et al.*, 2014). The  
763 Benjamini-Hochberg method was used to control for multiple testing (Benjamini & Hochberg,  
764 1995).

765 To check differential expression of the conserved *var* gene variants *var1*-3D7, *var1*-IT and  
766 *var2csa* raw reads were mapped with BWA-MEM (AS score >110) to the reference genes from  
767 the 3D7 and the IT strains. The mapped raw read counts (bam files) were normalized with the

768 number of 3D7 mappable reads in each isolate using bamCoverage by introducing a scaling  
769 factor to generate bigwig files displayed in Artemis (Carver *et al*, 2012).

770

#### 771 *Var domain and segment differential expression*

772 Differential expression analysis at the domain and segment level was performed using a similar  
773 approach to that described previously (Tonkin-Hill *et al*, 2018). Initially, the domain families  
774 and homology blocks defined in Rask *et al*. were annotated to the assembled transcripts using  
775 HMMER v3.1b2 (Rask *et al*, 2010; Eddy, 2011). Domains and segments previously identified  
776 to be significantly associated with severe disease in Tonkin-Hill *et al.*, 2018 were also anno-  
777 tated by single pairwise comparison in the assembled transcripts using USEARCH v11.0.667  
778 (Tonkin-Hill *et al*, 2018; Edgar, 2010). Overall, 336 contigs (5.22% of all contigs >500 bp) pos-  
779 sess partial domains in an unusual order, e.g. an NTS in an internal region or a tandem ar-  
780 rangement of two DBL $\alpha$  or CIDR $\alpha$  domains. This might be caused by *de novo* assembly errors,  
781 which is challenging from transcriptome data. Therefore, in both cases the domain or segment  
782 with the most significant alignment was taken as the best annotation for each region of the  
783 assembled *var* transcripts (E-value cutoff of  $1e^{-8}$ ), once with the additional requirement that at  
784 least 60% of the domain was found. The expression at each of these annotations was then  
785 quantified using featureCounts v1.6.4 before the counts were aggregated to give a total for  
786 each domain and segment family in each sample. Finally, similar to the transcript level analy-  
787 sis, DESeq2 was used to test for differences in expression levels of both domain and segment  
788 families in the naïve versus pre-exposed groups as well as the severe versus non-severe  
789 groups. Again, more than five read counts in at least three patient isolates were required for  
790 inclusion into differential expression analysis.

791

#### 792 *Differential expression of core genes*

793 Differential gene expression analysis of *P. falciparum* core genes was done in accordance to  
794 Tonkin-Hill *et al*. (Tonkin-Hill *et al*, 2018) by applying the script as given in the Github repository  
795 ([https://github.com/gtonkinhill/falciparum\\_transcriptome\\_manuscript/tree/master/all\\_gene\\_an-](https://github.com/gtonkinhill/falciparum_transcriptome_manuscript/tree/master/all_gene_analysis)  
796 [alysis](https://github.com/gtonkinhill/falciparum_transcriptome_manuscript/tree/master/all_gene_analysis)). In brief, subread-align v1.4.6 (Liao *et al*, 2013) were used to align the reads to the  
797 *H. sapiens* and *P. falciparum* reference genomes. Read counts for each gene were obtained  
798 with FeatureCounts v1.20.2 (Liao *et al*, 2014). To account for parasite life cycle, each sample  
799 is considered as a composition of six parasite life cycle stages excluding the ookinete stage  
800 (López-Barragán *et al*, 2011). Unwanted variations were determined with the 'RUV' (Remove  
801 Unwanted Variation) algorithm implemented in the R package ruv v0.9.6 (Gagnon-Bartsch &  
802 Speed, 2012) adjusting for systematic errors of unknown origin by using the genes with the  
803 1009 lowest p-values as controls as described in (Vignali *et al*, 2011). The gene counts and

804 estimated ring-stage factor, and factors of unwanted variation were then used as input for the  
805 Limma /Voom (Law *et al*, 2014; Smyth, 2005) differential analysis pipeline.

806

### 807 *Functional enrichment analysis of differentially expressed core genes*

808 Genes that were identified as significantly differentially expressed (defined as  $-1 < \log FC > 1$ ,  
809  $p < 0.05$ ) during prior differential gene expression analysis were used for functional enrichment  
810 analysis using the R package gprofiler2 (Kolberg *et al*, 2020). Enrichment analysis was per-  
811 formed on multiple input lists containing genes expressed significantly higher ( $\log FC > 1$ ,  $P <$   
812  $0.05$ ) and lower ( $\log FC < -1$ ,  $P < 0.05$ ) between different patient cohorts. All *var* genes were  
813 excluded from the enrichment analysis. For custom visualization of results, gene set data  
814 sources available for *P. falciparum* were downloaded from gprofiler (Raudvere *et al*, 2019).  
815 Pathway data available in the KEGG database (<https://www.kegg.jp/kegg/>) was accessed via  
816 the KEGG API using KEGGREST (Tenenbaum, 2020) to supplement gprofiler data sources  
817 and build a custom data source in Gene Matrix Transposed file format (\*.gmt) for subsequent  
818 visualization. Functional enrichment results were then output to a Generic Enrichment Map  
819 (GEM) for visualization using the Cytoscape EnrichmentMap app (Merico *et al*, 2010) and  
820 RCy3 (Gustavsen *et al*, 2019). Bar plots of differential gene expression values for genes of  
821 selected KEGG pathways were generated using ggplot2 (Wickham, 2016) and enriched KEGG  
822 pathways were visualized using KEGGprofile (Zhao S, Guo Y, 2020).

823

### 824 ***DBL $\alpha$ -tag sequencing***

825 For DBL $\alpha$ -tag PCR the forward primer varF\_dg2 (5'-tcgtcggcagcgtcagatgtgtataagaga-  
826 cagGCAMGMAGTTTTYGCNGATATWGG-3') and the reverse primer brlong2 (5'-  
827 gtctcgtgggctcggagatgtgtataagagacagTCTTCDSYCCATTCVTCRAACCA-3') were used result-  
828 ing in an amplicon size of 350-500 bp (median 422 bp) plus the 67 bp overhang (small type).  
829 Template cDNA (1  $\mu$ l) was mixed with 5x KAPA HiFi buffer, 0.3  $\mu$ M of each dNTP, 2  $\mu$ M of  
830 each primer and 0.5 U KAPA HiFi Hotstart Polymerase in a final reaction volume of 25  $\mu$ l.  
831 Reaction mixtures were incubated at 95°C for 2 min and then subjected to 35 cycles of 98°C  
832 for 20 s, 54°C for 30 s and 68°C for 75 s with a final elongation step at 72°C for 2 min. For the  
833 first 5 cycles cooling from denaturation temperature is performed to 65°C at a maximal ramp  
834 of 3°C per second, then cooled to 54°C with a 0.5°C per second ramp. Heating from annealing  
835 temperature to elongation temperature was performed with 1°C per second, all other steps  
836 with a ramp of 3°C per second. Agarose gel images taken afterwards showed clean amplicons.  
837 The DBL $\alpha$ -tag primers contain an overhang, which was used to conduct a second indexing  
838 PCR reaction using sample-specific indexing primers as described in Nag *et al*. (Nag *et al*,  
839 2017). The overhang sequence also serves as annealing site for Illumina sequencing primers  
840 and indexing primers include individual 8-base combinations and adapter sequences that will

841 allow the final PCR product to bind in MiSeq Illumina sequencing flow cells. Indexing PCR  
842 reactions were performed with a final primer concentration of 0.065  $\mu$ M and 1  $\mu$ l of first PCR  
843 amplicon in a final volume of 20  $\mu$ l; and by following steps: Heat activation at 95 °C, 15 min, 20  
844 cycles of 95 °C for 20 s, 60 °C for 1 min and 72 °C for 1 min, and one final elongation step at  
845 72 °C for 10 min. Indexing PCR amplicons were pooled (4  $\mu$ l of each) and purified using AM-  
846 Pure XP beads (Beckman Coulter, California, United States) according to manufacturer's pro-  
847 tocol, using 200  $\mu$ l pooled PCR product and 0.6 x PCR-pool volume of beads, to eliminate  
848 primer dimers. The purified PCR pool were analyzed on agarose gels and Agilent 2100 Bio-  
849 analyser to verify elimination of primer dimers, and correct amplicon sizes. Concentration of  
850 purified PCR pools was measured by Nanodrop2000 (Thermo Fisher Scientific, Waltham, MA,  
851 USA) and an aliquot adjusted to 4 nM concentration was pooled with other unrelated DNA  
852 material and added to an Illumina MiSeq instrument for paired end 300 bp reads using a MiSeq  
853 v3 flow cell.

854

#### 855 ***DBL $\alpha$ -tag sequence analysis***

856 The paired-end DBL $\alpha$ -tag sequences were identified and partitioned into correct sample origin  
857 based on unique index sequences. Each indexed raw sequence-pair were then processed  
858 through the *Galaxy* webtool ([usegalaxy.eu](http://usegalaxy.eu)). Read quality checks was first performed with  
859 *FastQC* to ensure a good NGS run (sufficient base quality, read length, duplication etc.). Next,  
860 the sequences were trimmed by the Trimmomatic application, with a four base sliding window  
861 approach and a *Phred* quality score above 20 to ensure high sequence quality output. The  
862 trimmed sequences were then paired and converted, following analysis using the *Varia* tool for  
863 quantification and prediction of the domain composition of the full-length *var* sequences from  
864 which the DBL $\alpha$ -tag originated (Mackenzie *et al*, 2020). In brief, *Varia* clusters DBL $\alpha$ -tags with  
865 99% sequence identity using *Vsearch* program (v2.14.2), and each unique tag is used to  
866 search a database consisting of roughly 235,000 annotated *var* genes for near identical *var*  
867 sequences (95% identity over 200 nucleotides). The domain composition of all "hit" sequences  
868 is checked for conflicting annotations and the most likely domain composition is returned. The  
869 tool validation indicated prediction of correct domain compositions for around 85% of randomly  
870 selected *var* tags, with higher hit rate and accuracy of the N-terminal domains. An average of  
871 2,223.70 reads per patient sample was obtained and clusters consisting of less than 10 reads  
872 were excluded from the analysis. The raw *Varia* output file is given in Table S8. The proportion  
873 of transcripts encoding a given *PfEMP1* domain type or subtype was calculated for each pa-  
874 tient. These expression levels were used to first test the hypothesis that N-terminal domain  
875 types associated with EPCR are found more frequently in first-time infections or upon severity  
876 of disease, while those associated with non-EPCR binding were associated with pre-exposed  
877 or mild cases. Secondly, quantile regression was used to calculate median differences (with



878 95%-confidence intervals) in expression levels for all main domain classes and subtypes be-  
879 tween severity and exposure groups. All analyses were done with R (4.02) using the package  
880 *quantreg* (5.73) for quantile regression.

881 For the comparison of both approaches, DBL $\alpha$ -tag sequencing and RNA-seq, only RNA-seq  
882 contigs spanning the whole DBL $\alpha$ -tag region were considered. All conserved variants, the sub-  
883 families *var1*, *var2csc* and *var3*, detected by RNA-seq were omitted from analysis since they  
884 were not properly amplified by the DBL $\alpha$ -tag primers. To scan for the occurrence of DBL $\alpha$ -tag  
885 sequences within the contigs assembled from the RNA-seq data we applied BLAST (basic  
886 local alignment search tool) v2.9.0 software (Altschul *et al*, 1990). Therefore, we created a  
887 BLAST database from the RNA-seq assemblies and screened for the occurrence of those  
888 DBL $\alpha$ -tag sequence with more than 97% percent sequence identity using the “megablast op-  
889 tion”.

890 Calculation of the proportion of RNA-seq data covered by DBL $\alpha$ -tag was done with the upper  
891 75<sup>th</sup> percentile based on total RPKM values determined for each patient. Vice versa, only  
892 DBL $\alpha$ -tag clusters with more than 10 reads were considered and percent coverage of reads  
893 and clusters calculated for each individual patient.

894 For all samples the agreement between the two molecular methods DBL $\alpha$ -tag sequencing and  
895 RNA-seq was analyzed with a Bland-Altman plot, each individually and summarized. The ratio  
896 between %-transformed measurements are plotted on the y-axis and the mean of the respec-  
897 tive DBL $\alpha$ -tag and RNA-seq results are plotted on the x-axis. The bias and the 95% limits of  
898 agreement were calculated using GraphPad Prism 8.4.2.

899

## 900 **Acknowledgments**

901

902 We thank all the patients providing an extra blood sample for our research purposes. Further-  
903 more, we thank Jürgen May for critical reading of the manuscript and Tobias Spielmann for  
904 helpful discussions. We thank Marlene Danner Dalgaard, Kathrine Hald Langhoff and Sif Ravn  
905 Søbørg technical assistance with DBL $\alpha$ -tag sequencing.

906

## 907 **References**

908

909 Altschul SF, Gish W, Miller W, Myers EW & Lipman DJ (1990) Basic local alignment search  
910 tool. *J Mol Biol* 215: 403–410

911 Andrade CM, Fleckenstein H, Thomson-Luque R, Doumbo S, Lima NF, Anderson C, Hibbert  
912 J, Hopp CS, Tran TM, Li S, *et al* (2020) Increased circulation time of Plasmodium  
913 falciparum underlies persistent asymptomatic infection in the dry season. *Nat Med*

914 Argy N, Kendjo E, Augé-Courtoi C, Cojean S, Clain J, Houzé P, Thellier M, Hubert V,

- 915 Deloron P & Houzé S (2017) Influence of host factors and parasite biomass on the  
916 severity of imported Plasmodium falciparum malaria. *PLoS One* 12: e0175328
- 917 Avril M, Brazier AJ, Melcher M, Sampath S & Smith JD (2013) DC8 and DC13 var Genes  
918 Associated with Severe Malaria Bind Avidly to Diverse Endothelial Cells. *PLoS Pathog* 9  
919 Avril M, Tripathi AK, Brazier AJ, Andisi C, Janes JH, Soma VL, Sullivan DJ, Bull PC, Stins  
920 MF & Smith JD (2012) A restricted subset of var genes mediates adherence of  
921 Plasmodium falciparum-infected erythrocytes to brain endothelial cells. *Proc Natl Acad*  
922 *Sci U S A* 109: E1782–E1790
- 923 Bachmann A, Bruske E, Krumkamp R, Turner L, Wichers JS, Petter M, Held J, Duffy MF,  
924 Sim BKL, Hoffman SL, *et al* (2019) Controlled human malaria infection with Plasmodium  
925 falciparum demonstrates impact of naturally acquired immunity on virulence gene  
926 expression. *PLOS Pathog* 15: e1007906
- 927 Benjamini Y & Hochberg Y (1995) Controlling the False Discovery Rate: A Practical and  
928 Powerful Approach to Multiple Testing. *J R Stat Soc Ser B* 57: 289–300
- 929 Berger SS, Turner L, Wang CW, Petersen JEV, Kraft M, Lusingu JPA, Mmbando B,  
930 Marquard AM, Bengtsson DBAC, Hviid L, *et al* (2013) Plasmodium falciparum  
931 Expressing Domain Cassette 5 Type PfEMP1 (DC5-PfEMP1) Bind PECAM1. *PLoS One*  
932 8: 69117
- 933 Bernabeu M, Danziger SA, Avril M, Vaz M, Babar PH, Brazier AJ, Herricks T, Maki JN,  
934 Pereira L, Mascarenhas A, *et al* (2016) Severe adult malaria is associated with specific  
935 PfEMP1 adhesion types and high parasite biomass. *Proc Natl Acad Sci U S A* 113:  
936 E3270–E3279
- 937 Bernabeu M, Gunnarsson C, Vishnyakova M, Howard CC, Nagao RJ, Avril M, Taylor TE,  
938 Seydel KB, Zheng Y & Smith JD (2019) Binding Heterogeneity of Plasmodium  
939 falciparum to Engineered 3D Brain Microvessels Is Mediated by EPCR and ICAM-1.  
940 *MBio* 10: e00420-19
- 941 Borrmann S (2020) Mapping of safe and early chemo-attenuated live Plasmodium falciparum  
942 immunization identifies immune signature of vaccine efficacy. *bioRxiv*:  
943 2020.09.14.296152
- 944 Carlson J, Helmbj H, Wahlgren M, Carlson J, Helmbj H, Wahlgren M, Hill A, Brewster D &  
945 Greenwood BM (1990) Human cerebral malaria: association with erythrocyte rosetting  
946 and lack of anti-rosetting antibodies. *Lancet* 336: 1457–1460
- 947 Carver T, Harris SR, Berriman M, Parkhill J & McQuillan JA (2012) Artemis: An integrated  
948 platform for visualization and analysis of high-throughput sequence-based experimental  
949 data. *Bioinformatics* 28: 464–469
- 950 Chaiyaroj SC, Coppel RL, Magowan C & Brown G V. (1994) A Plasmodium falciparum  
951 isolate with a chromosome 9 deletion expresses a trypsin-resistant cytoadherence

- 952 molecule. *Mol Biochem Parasitol* 67: 21–30
- 953 Cham GKK, Turner L, Kurtis JD, Mutabingwa T, Fried M, Jensen ATR, Lavstsen T, Hviid L,  
954 Duffy PE & Theander TG (2010) Hierarchical, domain type-specific acquisition of  
955 antibodies to Plasmodium falciparum erythrocyte membrane protein 1 in Tanzanian  
956 children. *Infect Immun* 78: 4653–4659
- 957 Cham GKK, Turner L, Lusingu J, Vestergaard L, Mmbando BP, Kurtis JD, Jensen ATR,  
958 Salanti A, Lavstsen T & Theander TG (2009) Sequential, Ordered Acquisition of  
959 Antibodies to Plasmodium falciparum Erythrocyte Membrane Protein 1 Domains . *J*  
960 *Immunol* 183: 3356–3363
- 961 Claessens A, Adams Y, Ghumra A, Lindergard G, Buchan CC, Andisi C, Bull PC, Mok S,  
962 Gupta AP, Wang CW, *et al* (2012) A subset of group A-like var genes encodes the  
963 malaria parasite ligands for binding to human brain endothelial cells. *Proc Natl Acad Sci*  
964 *U S A* 109: E1772
- 965 Dasanna AK, Lansche C, Lanzer M & Schwarz US (2017) Rolling Adhesion of Schizont  
966 Stage Malaria-Infected Red Blood Cells in Shear Flow. *Biophys J* 112: 1908–1919
- 967 Davidson NM & Oshlack A (2014) Corset: Enabling differential gene expression analysis for  
968 de novo assembled transcriptomes. *Genome Biol* 15: 410
- 969 Day KP, Karamalis F, Thompson J, Barnes DA, Peterson C, Brown H, Brown G V. & Kemp  
970 DJ (1993) Genes necessary for expression of a virulence determinant and for  
971 transmission of Plasmodium falciparum are located on a 0.3-megabase region of  
972 chromosome 9. *Proc Natl Acad Sci U S A* 90: 8292–8296
- 973 Dent AE, Malhotra I, Wang X, Babineau D, Yeo KT, Anderson T, Kimmel RJ, Angov E, Lanar  
974 DE, Narum D, *et al* (2016) Contrasting Patterns of Serologic and Functional Antibody  
975 Dynamics to Plasmodium falciparum Antigens in a Kenyan Birth Cohort. *Clin Vaccine*  
976 *Immunol* 23: 104–116
- 977 Doolan DL, Mu Y, Unal B, Sundaresh S, Hirst S, Valdez C, Randall A, Molina D, Liang X,  
978 Freilich DA, *et al* (2008) Profiling humoral immune responses to P. falciparum infection  
979 with protein microarrays. *Proteomics* 8: 4680–4694
- 980 Drakeley CJ, Corran PH, Coleman PG, Tongren JE, McDonald SLR, Carneiro I, Malima R,  
981 Lusingu J, Manjurano A, Nkya WMM, *et al* (2005) Estimating medium- and long-term  
982 trends in malaria transmission by using serological markers of malaria exposure. *Proc*  
983 *Natl Acad Sci U S A* 102: 5108–5113
- 984 Duffy F, Bernabeu M, Babar PH, Kessler A, Wang CW, Vaz M, Chery L, Mandala WL,  
985 Rogerson SJ, Taylor TE, *et al* (2019) Meta-analysis of Plasmodium falciparum var  
986 Signatures Contributing to Severe Malaria in African Children and Indian Adults. *MBio*  
987 10: e00217-19
- 988 Duffy MF, Brown G V., Basuki W, Krejany EO, Noviyanti R, Cowman AF & Reeder JC (2002)

- 989 Transcription of multiple var genes by individual, trophozoite-stage Plasmodium  
990 falciparum cells expressing a chondroitin sulphate A binding phenotype. *Mol Microbiol*  
991 43: 1285–1293
- 992 Duffy MF, Caragounis A, Noviyanti R, Kyriacou HM, Choong EK, Boysen K, Healer J, Rowe  
993 JA, Molyneux ME, Brown G V., *et al* (2006) Transcribed var genes associated with  
994 placental malaria in Malawian women. *Infect Immun* 74: 4875–4883
- 995 Duffy MF, Selvarajah SA, Josling GA & Petter M (2014) Epigenetic regulation of the  
996 plasmodium falciparum genome. *Brief Funct Genomics* 13: 203–216
- 997 Eddy SR (2011) Accelerated profile HMM searches. *PLoS Comput Biol* 7: 1002195
- 998 Edgar RC (2010) Search and clustering orders of magnitude faster than BLAST.  
999 *Bioinformatics* 26: 2460–2461
- 1000 Falk N, Kaestli M, Qi W, Ott M, Baea K, Cortés A & Beck HP (2009) Analysis of plasmodium  
1001 falciparum var genes expressed in children from Papua New Guinea. *J Infect Dis* 200:  
1002 347–356
- 1003 Felgner PL, Roestenberg M, Liang L, Hung C, Jain A, Pablo J, Nakajima-Sasaki R, Molina D,  
1004 Teelen K, Hermsen CC, *et al* (2013) Pre-erythrocytic antibody profiles induced by  
1005 controlled human malaria infections in healthy volunteers under chloroquine  
1006 prophylaxis. *Sci Rep* 3
- 1007 Gagnon-Bartsch JA & Speed TP (2012) Using control genes to correct for unwanted  
1008 variation in microarray data. *Biostatistics* 13: 539–552
- 1009 Ghumra A, Semblat J-P, Ataide R, Kifude C, Adams Y, Claessens A, Anong DN, Bull PC,  
1010 Fennell C, Arman M, *et al* (2012) Induction of Strain-Transcending Antibodies Against  
1011 Group A PfEMP1 Surface Antigens from Virulent Malaria Parasites. *PLoS Pathog* 8:  
1012 e1002665
- 1013 Gustavsen JA, Pai S, Isserlin R, Demchak B & Pico AR (2019) RCy3: Network biology using  
1014 Cytoscape from within R. *F1000Research* 8: 1774
- 1015 Heiber A, Kruse F, Pick C, Grüring C, Flemming S, Oberli A, Schoeler H, Retzlaff S, Mesén-  
1016 Ramírez P, Hiss JA, *et al* (2013) Identification of new PNEPs indicates a substantial  
1017 non-PEXEL exportome and underpins common features in Plasmodium falciparum  
1018 protein export. *PLoS Pathog* 9: e1003546
- 1019 Helb DA, Tetteh KKA, Felgner PL, Skinner J, Hubbard A, Arinaitwe E, Mayanja-Kizza H,  
1020 Ssewanyana I, Kanya MR, Beeson JG, *et al* (2015) Novel serologic biomarkers provide  
1021 accurate estimates of recent Plasmodium falciparum exposure for individuals and  
1022 communities. *Proc Natl Acad Sci U S A* 112: E4438–E4447
- 1023 Herricks T, Avril M, Janes J, Smith JD & Rathod PK (2013) Clonal variants of Plasmodium  
1024 falciparum exhibit a narrow range of rolling velocities to host receptor CD36 under  
1025 dynamic flow conditions. *Eukaryot Cell* 12: 1490–1498

- 1026 Van Den Hoogen LL, Walk J, Oulton T, Reuling IJ, Reiling L, Beeson JG, Coppel RL, Singh  
1027 SK, Draper SJ, Bousema T, *et al* (2019) Antibody responses to antigenic targets of  
1028 recent exposure are associated with low-density parasitemia in controlled human  
1029 plasmodium falciparum infections. *Front Microbiol* 10
- 1030 Hsieh FL, Turner L, Bolla JR, Robinson C V., Lavstsen T & Higgins MK (2016) The structural  
1031 basis for CD36 binding by the malaria parasite. *Nat Commun* 7
- 1032 Huang X & Madan A (1999) CAP3: A DNA sequence assembly program. *Genome Res* 9:  
1033 868–877
- 1034 Janes JH, Wang CP, Levin-Edens E, Vigan-Womas I, Guillotte M, Melcher M, Mercereau-  
1035 Puijalon O & Smith JD (2011) Investigating the host binding signature on the  
1036 Plasmodium falciparum PfEMP1 protein family. *PLoS Pathog* 7
- 1037 Jensen AR, Adams Y & Hviid L (2020) Cerebral Plasmodium falciparum malaria: The role of  
1038 PfEMP1 in its pathogenesis and immunity, and PfEMP1-based vaccines to prevent it.  
1039 *Immunol Rev* 293: 230–252 doi:10.1111/imr.12807
- 1040 Jensen ATR, Magistrado P, Sharp S, Joergensen L, Lavstsen T, Chiucchiuini A, Salanti A,  
1041 Vestergaard LS, Lusingu JP, Hermsen R, *et al* (2004) Plasmodium falciparum  
1042 Associated with Severe Childhood Malaria Preferentially Expresses PfEMP1 Encoded  
1043 by Group A var Genes. *J Exp Med* 199: 1179–1190
- 1044 Jespersen JS, Wang CW, Mkumbaye SI, Minja DT, Petersen B, Turner L, Petersen JE,  
1045 Lusingu JP, Theander TG & Lavstsen T (2016) Plasmodium falciparum var genes  
1046 expressed in children with severe malaria encode CIDR $\alpha$ 1 domains. *EMBO Mol Med* 8:  
1047 839–850
- 1048 Kapelski S, Klockenbring T, Fischer R, Barth S & Fendel R (2014) Assessment of the  
1049 neutrophilic antibody-dependent respiratory burst (ADRB) response to Plasmodium  
1050 falciparum . *J Leukoc Biol* 96: 1131–1142
- 1051 Kessler A, Dankwa S, Bernabeu M, Harawa V, Danziger SA, Duffy F, Kampondeni SD,  
1052 Potchen MJ, Dambrauskas N, Vigdorovich V, *et al* (2017) Linking EPCR-Binding  
1053 PfEMP1 to Brain Swelling in Pediatric Cerebral Malaria. *Cell Host Microbe* 22: 601-  
1054 614.e5
- 1055 Kirchgatter K & Del Portillo HA (2002) Association of severe noncerebral Plasmodium  
1056 falciparum malaria in Brazil with expressed PfEMP1 DBL1 $\alpha$  sequences lacking cysteine  
1057 residues. *Mol Med* 8: 16–23
- 1058 Kivisi CA, Muthui M, Hunt M, Fegan G, Otto TD, Githinji G, Warimwe GM, Rance R, Marsh  
1059 K, Bull PC, *et al* (2019) Exploring Plasmodium falciparum Var Gene Expression to  
1060 Assess Host Selection Pressure on Parasites During Infancy. *Front Immunol* 10: 2328
- 1061 Kolberg L, Raudvere U, Kuzmin I, Vilo J & Peterson H (2020) gprofiler2 -- an R package for  
1062 gene list functional enrichment analysis and namespace conversion toolset g:Profiler.

- 1063 *F1000Research* 9: 709
- 1064 Kraemer SM & Smith JD (2003) Evidence for the importance of genetic structuring to the  
1065 structural and functional specialization of the *Plasmodium falciparum* var gene family.  
1066 *Mol Microbiol* 50: 1527–1538
- 1067 Kyes SA, Christodoulou Z, Raza A, Horrocks P, Pinches R, Rowe JA & Newbold CI (2003) A  
1068 well-conserved *Plasmodium falciparum* var gene shows an unusual stage-specific  
1069 transcript pattern. *Mol Microbiol* 48: 1339–1348
- 1070 Kyes SA, Kraemer SM & Smith JD (2007) Antigenic variation in *Plasmodium falciparum*:  
1071 Gene organization and regulation of the var multigene family. *Eukaryot Cell* 6: 1511–  
1072 1520 doi:10.1128/EC.00173-07
- 1073 Kyriacou HM, Stone GN, Challis RJ, Raza A, Lyke KE, Thera MA, Koné AK, Doumbo OK,  
1074 Plowe C V. & Rowe JA (2006) Differential var gene transcription in *Plasmodium*  
1075 *falciparum* isolates from patients with cerebral malaria compared to hyperparasitaemia.  
1076 *Mol Biochem Parasitol* 150: 211–218
- 1077 Lau CKY, Turner L, Jespersen JS, Lowe ED, Petersen B, Wang CW, Petersen JEV, Lusingu  
1078 J, Theander TG, Lavstsen T, *et al* (2015) Structural conservation despite huge  
1079 sequence diversity allows EPCR binding by the pfemp1 family implicated in severe  
1080 childhood malaria. *Cell Host Microbe* 17: 118–129
- 1081 Lavstsen T, Salanti A, Jensen ATR, Arnot DE & Theander TG (2003) Sub-grouping of  
1082 *Plasmodium falciparum* 3D7 var genes based on sequence analysis of coding and non-  
1083 coding regions. *Malar J* 2: 1–14
- 1084 Lavstsen T, Turner L, Saguti F, Magistrado P, Rask TS, Jespersen JS, Wang CW, Berger  
1085 SS, Baraka V, Marquard AM, *et al* (2012) *Plasmodium falciparum* erythrocyte  
1086 membrane protein 1 domain cassettes 8 and 13 are associated with severe malaria in  
1087 children. *Proc Natl Acad Sci U S A* 109: E1791–E1800
- 1088 Law CW, Chen Y, Shi W & Smyth GK (2014) Voom: Precision weights unlock linear model  
1089 analysis tools for RNA-seq read counts. *Genome Biol* 15
- 1090 Lee HJ, Georgiadou A, Walther M, Nwakanma D, Stewart LB, Levin M, Otto TD, Conway DJ,  
1091 Coin LJ & Cunnington AJ (2018) Integrated pathogen load and dual transcriptome  
1092 analysis of systemic host-pathogen interactions in severe malaria. *Sci Transl Med* 10:  
1093 eaar3619
- 1094 Lennartz F, Adams Y, Bengtsson A, Olsen RW, Turner L, Ndam NT, Ecklu-Mensah G,  
1095 Moussiliou A, Ofori MF, Gamain B, *et al* (2017) Structure-Guided Identification of a  
1096 Family of Dual Receptor-Binding PfEMP1 that Is Associated with Cerebral Malaria. *Cell*  
1097 *Host Microbe* 21: 403–414
- 1098 Lennartz F, Smith C, Craig AG & Higgins MK (2019) Structural insights into diverse modes of  
1099 ICAM-1 binding by *Plasmodium falciparum*-infected erythrocytes. *Proc Natl Acad Sci U*

- 1100 S A 116: 20124–20134
- 1101 Li H (2013) Aligning sequence reads, clone sequences and assembly contigs with BWA-  
1102 MEM. arXiv:1303.3997
- 1103 Liao Y, Smyth GK & Shi W (2013) The Subread aligner: Fast, accurate and scalable read  
1104 mapping by seed-and-vote. *Nucleic Acids Res* 41
- 1105 Liao Y, Smyth GK & Shi W (2014) FeatureCounts: An efficient general purpose program for  
1106 assigning sequence reads to genomic features. *Bioinformatics* 30: 923–930
- 1107 Llewellyn D, Miura K, Fay MP, Williams AR, Murungi LM, Shi J, Hodgson SH, Douglas AD,  
1108 Osier FH, Fairhurst RM, *et al* (2015) Standardization of the antibody-dependent  
1109 respiratory burst assay with human neutrophils and *Plasmodium falciparum* malaria. *Sci*  
1110 *Rep* 5
- 1111 López-Barragán MJ, Lemieux J, Quiñones M, Williamson KC, Molina-Cruz A, Cui K, Barillas-  
1112 Mury C, Zhao K & Su X (2011) Directional gene expression and antisense transcripts in  
1113 sexual and asexual stages of *Plasmodium falciparum*. *BMC Genomics* 12: 587
- 1114 Love MI, Huber W & Anders S (2014) Moderated estimation of fold change and dispersion  
1115 for RNA-seq data with DESeq2. *Genome Biol* 15: 550
- 1116 Lubiana P, Bouws P, Roth LK, Dörpinghaus M, Rehn T, Brehmer J, Wichers JS, Bachmann  
1117 A, Höhn K, Roeder T, *et al* (2020) Adhesion between *P. falciparum* infected  
1118 erythrocytes and human endothelial receptors follows alternative binding dynamics  
1119 under flow and febrile conditions. *Sci Rep* 10: 4548
- 1120 Mackenzie G, Jensen R, Lavstsen T & Otto T (2020) Varia: Prediction of variable genes.  
1121 (<https://github.com/GCJMackenzie/Varia>)
- 1122 Magallón-Tejada A, Machevo S, Cisteró P, Lavstsen T, Aide P, Rubio M, Jiménez A, Turner  
1123 L, Valmaseda A, Gupta H, *et al* (2016) Cytoadhesion to gC1qR through *Plasmodium*  
1124 *falciparum* Erythrocyte Membrane Protein 1 in Severe Malaria. *PLOS Pathog* 12:  
1125 e1006011
- 1126 Maier AG, Rug M, O'Neill MT, Brown M, Chakravorty S, Szeszak T, Chesson J, Wu Y,  
1127 Hughes K, Coppel RL, *et al* (2008) Exported Proteins Required for Virulence and  
1128 Rigidity of *Plasmodium falciparum*-Infected Human Erythrocytes. *Cell* 134: 48–61
- 1129 McGee M & Chen Z (2006) Parameter estimation for the exponential-normal convolution  
1130 model for background correction of affymetrix GeneChip data. *Stat Appl Genet Mol Biol*  
1131 5
- 1132 McHugh E, Carmo OMS, Blanch A, Looker O, Liu B, Tiash S, Andrew D, Batinovic S, Low  
1133 AJY, Cho HJ, *et al* (2020) Role of *plasmodium falciparum* protein GEXP07 in Maurer's  
1134 Cleft morphology, Knob architecture, and *P. Falciparum* EMP1 trafficking. *MBio* 11
- 1135 McQuaid F & Rowe JA (2020) Rosetting revisited: A critical look at the evidence for host  
1136 erythrocyte receptors in *Plasmodium falciparum* rosetting. *Parasitology* 147: 1–11

- 1137 doi:10.1017/S0031182019001288
- 1138 Merico D, Isserlin R, Stueker O, Emili A & Bader GD (2010) Enrichment Map: A Network-  
1139 Based Method for Gene-Set Enrichment Visualization and Interpretation. *PLoS One* 5:  
1140 e13984
- 1141 Mkumbaye SI, Wang CW, Lyimo E, Jespersen JS, Manjurano A, Mosha J, Kavishe RA,  
1142 Mwakalinga SB, Minja DTR, Lusingu JP, *et al* (2017) The severity of *Plasmodium*  
1143 *falciparum* infection is associated with transcript levels of *var* genes encoding EPCR-  
1144 binding PfEMP1. *Infect Immun*: IAI.00841-16
- 1145 Nacer A, Roux E, Pomel S, Scheidig-Benatar C, Sakamoto H, Lafont F, Scherf A & Mattei D  
1146 (2011) clag9 is not essential for PfEMP1 surface expression in non-cytoadherent  
1147 *Plasmodium falciparum* parasites with a chromosome 9 deletion. *PLoS One* 6
- 1148 Nag S, Dalgaard MD, Kofoed PE, Ursing J, Crespo M, Andersen LOB, Aarestrup FM, Lund  
1149 O & Alifrangis M (2017) High throughput resistance profiling of *Plasmodium falciparum*  
1150 infections based on custom dual indexing and Illumina next generation sequencing-  
1151 technology. *Sci Rep* 7: 1–13
- 1152 Nunes MC, Goldring JPD, Doerig C & Scherf A (2007) A novel protein kinase family in  
1153 *Plasmodium falciparum* is differentially transcribed and secreted to various cellular  
1154 compartments of the host cell. *Mol Microbiol* 63: 391–403
- 1155 Obeng-Adjei N, Larremore DB, Turner L, Ongoiba A, Li S, Doumbo S, Yazew TB, Kayentao  
1156 K, Miller LH, Traore B, *et al* (2020) Longitudinal analysis of naturally acquired PfEMP1  
1157 CIDR domain variant antibodies identifies associations with malaria protection. *JCI*  
1158 *Insight*
- 1159 Oberli A, Slater LM, Cutts E, Brand F, Mundwiler-Pachlatko E, Rusch S, Masik MFG, Erat  
1160 MC, Beck HP & Vakonakis I (2014) A *Plasmodium falciparum* PHIST protein binds the  
1161 virulence factor PfEMP1 and comigrates to knobs on the host cell surface. *FASEB J* 28:  
1162 4420–4433
- 1163 Oberli A, Zurbrügg L, Rusch S, Brand F, Butler ME, Day JL, Cutts EE, Lavstsen T,  
1164 Vakonakis I & Beck HP (2016) *Plasmodium falciparum* *Plasmodium* helical interspersed  
1165 subtelomeric proteins contribute to cytoadherence and anchor P. *falciparum* erythrocyte  
1166 membrane protein 1 to the host cell cytoskeleton. *Cell Microbiol* 18: 1415–1428
- 1167 Obiero JM, Campo JJ, Scholzen A, Randall A, Bijker EM, Roestenberg M, Hermsen CC,  
1168 Teng A, Jain A, Davies DH, *et al* (2019) Antibody Biomarkers Associated with Sterile  
1169 Protection Induced by Controlled Human Malaria Infection under Chloroquine  
1170 Prophylaxis. *mSphere* 4
- 1171 Otto TD (2019) ThomasDOtto/varDB: First release of varDB.
- 1172 Otto TD, Assefa SA, Böhme U, Sanders MJ, Kwiatkowski D, Berriman M, Newbold C &  
1173 Newbold C (2019) Evolutionary analysis of the most polymorphic gene family in



- 1174 falciparum malaria. *Wellcome Open Res* 4: 193
- 1175 Otto TD, Böhme U, Sanders M, Reid A, Bruske EI, Duffy CW, Bull PC, Pearson RD, Abdi A,  
1176 Dimonte S, *et al* (2018a) Long read assemblies of geographically dispersed  
1177 Plasmodium falciparum isolates reveal highly structured subtelomeres. *Wellcome open*  
1178 *Res* 3: 52
- 1179 Otto TD, Gilabert A, Crellen T, Böhme U, Arnathau C, Sanders M, Oyola SO, Okouga AP,  
1180 Boundenga L, Willaume E, *et al* (2018b) Genomes of all known members of a  
1181 Plasmodium subgenus reveal paths to virulent human malaria. *Nat Microbiol* 3: 687–  
1182 697
- 1183 Patro R, Duggal G, Love MI, Irizarry RA & Kingsford C (2017) Salmon provides fast and bias-  
1184 aware quantification of transcript expression. *Nat Methods* 14: 417–419
- 1185 Perkins M (1988) Stage-dependent processing and localization of a Plasmodium falciparum  
1186 protein of 130,000 molecular weight. *Exp Parasitol* 65: 61–68
- 1187 Rask TS, Hansen DA, Theander TG, Gorm Pedersen A & Lavstsen T (2010) Plasmodium  
1188 falciparum Erythrocyte Membrane Protein 1 Diversity in Seven Genomes – Divide and  
1189 Conquer. *PLoS Comput Biol* 6: e1000933
- 1190 Raudvere U, Kolberg L, Kuzmin I, Arak T, Adler P, Peterson H & Vilo J (2019) G:Profiler: A  
1191 web server for functional enrichment analysis and conversions of gene lists (2019  
1192 update). *Nucleic Acids Res* 47: W191–W198
- 1193 Robert F, Ntoumi F, Angel G, Candito D, Rogier C, Fandeur T, Sarthou JL & Mercereau-  
1194 Puijalon O (1996) Extensive genetic diversity of Plasmodium falciparum isolates  
1195 collected from patients with severe malaria in Dakar, Senegal. *Trans R Soc Trop Med*  
1196 *Hyg* 90: 704–711
- 1197 Rottmann M, Lavstsen T, Mugasa JP, Kaestli M, Jensen ATR, Müller D, Theander T & Beck  
1198 HP (2006) Differential expression of var gene groups is associated with morbidity  
1199 caused by Plasmodium falciparum infection in Tanzanian children. *Infect Immun* 74:  
1200 3904–3911
- 1201 Rowe JA, Claessens A, Corrigan RA & Arman M (2009) Adhesion of Plasmodium  
1202 falciparum-infected erythrocytes to human cells: Molecular mechanisms and therapeutic  
1203 implications. *Expert Rev Mol Med* 11: e16 doi:10.1016/0925-4005(95)85135-6
- 1204 Rowe JA, Obiero J, Marsh K & Raza A (2002) Short report: Positive correlation between  
1205 rosetting and parasitemia in Plasmodium falciparum clinical isolates. *Am J Trop Med*  
1206 *Hyg* 66: 458–460
- 1207 Saul A (1999) The role of variant surface antigens on malaria-infected red blood cells.  
1208 *Parasitol Today* 15: 455–7
- 1209 Shabani E, Hanisch B, Opoka RO, Lavstsen T & John CC (2017) Plasmodium falciparum  
1210 EPCR-binding PfEMP1 expression increases with malaria disease severity and is

- 1211 elevated in retinopathy negative cerebral malaria. *BMC Med* 15: 183
- 1212 Silver JD, Ritchie ME & Smyth GK (2009) Microarray background correction: Maximum  
1213 likelihood estimation for the normal-exponential convolution. *Biostatistics* 10: 352–363
- 1214 Smyth GK (2005) limma: Linear Models for Microarray Data. In *Bioinformatics and*  
1215 *Computational Biology Solutions Using R and Bioconductor* pp 397–420. Springer-  
1216 Verlag
- 1217 Spielmann T, Hawthorne PL, Bixon MWA, Hannemann M, Klotz K, Kemp DJ, Klonis N, Tilley  
1218 L, Trenholme KR & Gardiner DL (2006) A cluster of ring stage-specific genes linked to a  
1219 locus implicated in cytoadherence in *Plasmodium falciparum* codes for PEXEL-negative  
1220 and PEXEL-positive proteins exported into the host cell. *Mol Biol Cell* 17: 3613–3624
- 1221 Spycher C, Klonis N, Spielmann T, Kump E, Steiger S, Tilley L & Beck H-P (2003) MAHRP-  
1222 1, a novel *Plasmodium falciparum* histidine-rich protein, binds ferriprotoporphyrin IX and  
1223 localizes to the Maurer's clefts. *J Biol Chem* 278: 35373–83
- 1224 Spycher C, Rug M, Klonis N, Ferguson DJP, Cowman AF, Beck H-P & Tilley L (2006)  
1225 Genesis of and Trafficking to the Maurer's Clefts of *Plasmodium falciparum*-Infected  
1226 Erythrocytes. *Mol Cell Biol* 26: 4074–4085
- 1227 Spycher C, Rug M, Pachlatko E, Hanssen E, Ferguson D, Cowman AF, Tilley L & Beck H  
1228 (2008) The Maurer's cleft protein MAHRP1 is essential for trafficking of PfEMP1 to the  
1229 surface of *Plasmodium falciparum*-infected erythrocytes. *Mol Microbiol* 68: 1300–1314
- 1230 Storm J, Jespersen JS, Seydel KB, Szeszak T, Mbewe M, Chisala N V, Phula P, Wang CW,  
1231 Taylor TE, Moxon CA, *et al* (2019) Cerebral malaria is associated with differential  
1232 cytoadherence to brain endothelial cells. *EMBO Mol Med* 11
- 1233 Taghavian O, Jain A, Joyner CJ, Ketchum S, Nakajima R, Jasinskas A, Liang L, Fong R,  
1234 King C, Greenhouse B, *et al* (2018) Antibody Profiling by Proteome Microarray with  
1235 Multiplex Isotype Detection Reveals Overlap between Human and *Aotus nancymae*  
1236 Controlled Malaria Infections. *Proteomics* 18
- 1237 Tenenbaum D (2020) KEGGREST: Client-side REST access to KEGG. R package version  
1238 1.30.0.
- 1239 Tonkin-Hill GQ, Trianty L, Noviyanti R, Nguyen HHT, Sebayang BF, Lampah DA, Marfurt J,  
1240 Cobbold SA, Rambhatla JS, McConville MJ, *et al* (2018) The *Plasmodium falciparum*  
1241 transcriptome in severe malaria reveals altered expression of genes involved in  
1242 important processes including surface antigen-encoding *var* genes. *PLoS Biol* 16:  
1243 e2004328
- 1244 Tonkin CJ, Carret CK, Duraisingh MT, Voss TS, Ralph SA, Hommel M, Duffy MF, Da Silva  
1245 LM, Scherf A, Ivens A, *et al* (2009) Sir2 paralogues cooperate to regulate virulence  
1246 genes and antigenic variation in *Plasmodium falciparum*. *PLoS Biol* 7: 0771–0788
- 1247 Turewicz M, Ahrens M, May C, Marcus K & Eisenacher M (2016) PAA: An R/bioconductor

- 1248 package for biomarker discovery with protein microarrays. *Bioinformatics* 32: 1577–  
1249 1579
- 1250 Turner L, Lavstsen T, Berger SS, Wang CW, Petersen JE V., Avril M, Brazier AJ, Freeth J,  
1251 Jespersen JS, Nielsen MA, *et al* (2013) Severe malaria is associated with parasite  
1252 binding to endothelial protein C receptor. *Nature* 498: 502–505
- 1253 Turner L, Lavstsen T, Mmbando BP, Wang CW, Magistrado PA, Vestergaard LS, Ishengoma  
1254 DS, Minja DTR, Lusingu JP & Theander TG (2015) IgG antibodies to endothelial protein  
1255 C receptor-binding cysteine-rich interdomain region domains of *Plasmodium falciparum*  
1256 erythrocyte membrane protein 1 are acquired early in life in individuals exposed to  
1257 malaria. *Infect Immun* 83: 3096–3103
- 1258 Vignali M, Armour CD, Chen J, Morrison R, Castle JC, Biery MC, Bouzek H, Moon W, Babak  
1259 T, Fried M, *et al* (2011) NSR-seq transcriptional profiling enables identification of a gene  
1260 signature of *Plasmodium falciparum* parasites infecting children. *J Clin Invest* 121:  
1261 1119–1129
- 1262 Wang WF & Zhang YL (2020) PfSWIB, a potential chromatin regulator for var gene  
1263 regulation and parasite development in *Plasmodium falciparum*. *Parasites and Vectors*  
1264 13: 48
- 1265 Warimwe GM, Keane TM, Fegan G, Musyoki JN, Newton CRJC, Pain A, Berriman M, Marsh  
1266 K & Bull PC (2009) *Plasmodium falciparum* var gene expression is modified by host  
1267 immunity. *Proc Natl Acad Sci U S A* 106: 21801–21806
- 1268 WHO (2019) WHO World Malaria Report 2019
- 1269 Wickham H (2016) Ggplot2 : elegant graphics for data analysis Springer
- 1270 Winter G, Chen Q, Flick K, Kremsner P, Fernandez V & Wahlgren M (2003) The 3D7var5.2  
1271 (varCOMMON) type var gene family is commonly expressed in non-placental  
1272 *Plasmodium falciparum* malaria. *Mol Biochem Parasitol* 127: 179–191
- 1273 Xie Y, Wu G, Tang J, Luo R, Patterson J, Liu S, Huang W, He G, Gu S, Li S, *et al* (2014)  
1274 SOAPdenovo-Trans: De novo transcriptome assembly with short RNA-Seq reads.  
1275 *Bioinformatics* 30: 1660–1666
- 1276 Yam XY, Birago C, Fratini F, Di Girolamo F, Raggi C, Sargiacomo M, Bachi A, Berry L, Fall  
1277 G, Currà C, *et al* (2013) Proteomic analysis of detergent-Resistant membrane  
1278 microdomains in trophozoite blood stage of the human malaria parasite *plasmodium*  
1279 *falciparum*. *Mol Cell Proteomics* 12: 3948–3961
- 1280 Zhang Q, Siegel TN, Martins RM, Wang F, Cao J, Gao Q, Cheng X, Jiang L, Hon CC,  
1281 Scheidig-Benatar C, *et al* (2014) Exonuclease-mediated degradation of nascent RNA  
1282 silences genes linked to severe malaria. *Nature* 513: 431–435
- 1283 Zhao S, Guo Y SY (2020) KEGGprofile: An annotation and visualization package for multi-  
1284 types and multi-groups expression data in KEGG pathway. R package version 1.32.0.

1285

1286 **Figure legends**

1287

1288 **Figure 1: Subgrouping of patients into first-time infected and pre-exposed individuals**  
1289 **based on antibody levels against *P. falciparum*.** In order to further characterize the patient  
1290 cohort plasma samples (n=32) were subjected to Luminex analysis with the *P. falciparum* an-  
1291 tigenes AMA1, MSP1, CSP known to induce a strong antibody response in humans. With ex-  
1292 ception of patient #21 unsupervised clustering of the PCA-reduced data clearly discriminates  
1293 between first-time infected (naïve) and pre-exposed patients with higher antibody levels  
1294 against tested *P. falciparum* antigens and also assigns plasma samples from patients with  
1295 unknown immune status into naïve and pre-exposed clusters (**A**). Classification of patient #21  
1296 into the naïve subgroup was confirmed using different serological assays assessing antibody  
1297 levels against *P. falciparum* on different levels: a merozoite-directed antibody-dependent res-  
1298 piratory burst (mADRB) assay (Kapelski *et al*, 2014) (**B**), a PEMS-specific ELISA (**C**) and a  
1299 262-feature protein microarray covering 228 well-known *P. falciparum* antigens detecting re-  
1300 activity with individual antigens and the antibody breadth of IgG (upper panel) and IgM (lower  
1301 panel) (**D**). The boxes represent medians with IQR; the whiskers depict minimum and maxi-  
1302 mum values (range) with outliers located outside the whiskers. Serological assays revealed  
1303 significant differences between patient groups (Mann Whitney U test). Reactivity of patient  
1304 plasma IgG and IgM with individual antigens in the protein microarray is presented as volcano  
1305 plot highlighting the significant hits in red. Box plots represent antibody breadths by summa-  
1306 rizing the number of recognized antigens out of 262 features tested. Data from all assays were  
1307 used for an unsupervised random forest approach (**E**). The variable importance plot of the  
1308 random forest model shows the decrease in prediction accuracy if values of a variable are  
1309 permuted randomly. The decrease in accuracy was determined for each serological assay  
1310 indicating that the mADRB, ELISA and Luminex assays are most relevant in the prediction of  
1311 patient clusters (**F**). Patients with known immune status based on medical reports were marked  
1312 in all plots with filled circles in blue (naïve) and grey (pre-exposed), samples from patients with  
1313 unknown immune status are shown as open circles. ELISA: Enzyme-linked immunosorbent  
1314 assay, IQR: interquartile range, PCA: Principal component analysis

1315

1316 **Figure 2: Estimated stage proportions for each sample.** Patient samples consist of a com-  
1317 bination of different parasite stages. To estimate the proportion of different life cycle stages in  
1318 each sample a constrained linear model was fit using data from López-Barragán *et al*. (López-  
1319 Barragán *et al*, 2011). The proportions of rings (8 hpi), early trophozoites (19 hpi), late tropho-  
1320 zoites (30 hpi), schizonts (42 hpi) and gametocytes stages shown in the columns of the bar  
1321 plots must add to 1 for each sample. Shown are the comparisons between first-time infected

1322 (naïve; blue) and pre-exposed samples (grey) (**A**) and severe (red) and non-severe cases  
1323 (grey) (**B**). A bias towards the early trophozoite appears in the non-severe malaria sample  
1324 group, which was confirmed by calculating the age in hours post infection (hpi) for each para-  
1325 site sample. The boxes represent medians with IQR; the whiskers depict minimum and maxi-  
1326 mum values (range) with outliers located outside the whiskers (**C, D**). IQR: interquartile range  
1327

1328 **Figure 3: Analysis of RNA-seq data at the level of *var* gene transcripts using the sepa-**  
1329 **rate assembly approach.** RNA-seq reads of each patient sample were matched to *de novo*  
1330 assembled *var* contigs with varying length, domain and homology block composition. Shown  
1331 are significant differently expressed *var* gene contigs with an adjusted p-value of <0.05 in first-  
1332 time infected (blue) and pre-exposed patient samples (grey) (**A, B**) as well as severe (red) and  
1333 non-severe cases (grey) (**C, D**). Data are displayed as heatmaps showing expression levels  
1334 in log transformed normalized Salmon read counts for each individual sample (**A, C**) or as box  
1335 plot with median log transformed normalized Salmon read counts and interquartile range (IQR)  
1336 for each group of samples (**B, D**). Normalized Salmon read counts for all assembled transcripts  
1337 are available in Table S4.

1338  
1339 **Figure 4: Analysis of RNA-seq data via *de novo* assembly at the level of *var* gene do-**  
1340 **main.** RNA-seq reads of each patient sample were matched to *de novo* assembled *var* con-  
1341 tigs with varying length, domain and homology block composition. Shown are significantly dif-  
1342 ferently expressed *PfEMP1* domain subfamilies from Rask *et al.* (Rask *et al.*, 2010) with an  
1343 adjusted p-value of <0.05 in first-time infected (blue) and pre-exposed patient samples (grey)  
1344 (**A, B**) as well as severe (red) and non-severe cases (grey) (**C, D**) using HMMER3 models.  
1345 The N-terminal head structure (NTS-DBL $\alpha$ -CIDR $\alpha/\beta/\gamma/\delta$ ) confers a mutually exclusive binding  
1346 phenotype either to EPCR-, CD36-, CSA- or an unknown receptor. Expression values of the  
1347 N-terminal domains were summarized for each patient and differences in the distribution  
1348 among patient groups were tested using the Mann-Whitney U test (**E, F**). Data are displayed  
1349 as heatmaps showing expression levels in log transcripts per million (TPM) for each individual  
1350 sample (**A, C**) or as box plot with median log TPM and interquartile range (IQR) for each group  
1351 of samples (**B, D, E, F**).

1352  
1353 **Figure 5: Analysis of RNA-seq data via *de novo* assembly at the level of *var* gene ho-**  
1354 **mology blocks.** RNA-seq reads of each patient sample were matched to *de novo* assembled  
1355 *var* contigs with varying length, domain and homology block composition. Shown are signifi-  
1356 cantly differently expressed homology blocks from Rask *et al.* (Rask *et al.*, 2010) with an ad-  
1357 justed p-value of <0.05 in first-time infected (blue) and pre-exposed patient samples (grey) (**A,**  
1358 **B**) as well as severe (red) and non-severe cases (grey) (**C, D**). Data are displayed as heatmaps  
1359 showing expression levels in log transcripts per million (TPM) for each individual sample (**A,**

1360 **C)** or as box plot with median log TPM and interquartile range (IQR) for each group of samples  
1361 **(B, D)**.

1362

1363 **Figure 6: Summary of PfEMP1 transcripts, domains, and homology blocks that were**  
1364 **found more or less frequently in malaria-naïve and severely ill patients.** A schematic  
1365 presentation of typical PfEMP1 domain compositions **(A)**. The N-terminal head structure con-  
1366 fers mutually exclusive receptor binding phenotypes: EPCR (yellow: CIDR $\alpha$ 1.1/4-8), CD36  
1367 (salmon CIDR $\alpha$ 2-6), CSA (VAR2CSA) and yet unknown phenotypes (orange: CIDR $\beta$ / $\gamma$ / $\delta$ , red:  
1368 CIDR $\alpha$ 1.2/3 from VAR1, VAR3). Group A includes the conserved subfamilies VAR1 and VAR3,  
1369 EPCR binding variants and those with unknown binding phenotypes sometimes associated  
1370 with rosetting. Group B PfEMP1 can have EPCR-binding capacities, but most variants share  
1371 a four-domain structure with group C-type variants capable of CD36-binding. Dual binder can  
1372 be found within group A and B with an DBL $\beta$  domain responsible for ICAM-1- (DBL $\beta$ 1/3/5) or  
1373 gC1qr-binding (DBL $\beta$ 12). Inter-strain conserved tandem arrangements of domains, so called  
1374 domain cassettes (DC), can be found within all groups as selectively indicated.

1375 Transcripts, domains and homology blocks according to Rask *et al.* (Rask *et al.*, 2010) found  
1376 significant differently expressed (p-value <0.05) between patient groups of both comparisons:  
1377 first-time infected (blue) versus pre-exposed (black) cases and severe (red) versus non-severe  
1378 (black) cases **(B)**.

1379 ATS: acidic terminal sequence, CIDR: cysteine-rich interdomain region, CSA: chondroitin sul-  
1380 phate A, DBL: Duffy binding-like, DC: domain cassette, EPCR: endothelial protein C receptor,  
1381 gC1qr: receptor for complement component C1q, ICAM-1: intercellular adhesion molecule 1,  
1382 NTS: N-terminal segment, TM: transmembrane domain

1383

1384 **Figure 7: Verification of RNA-seq results using DBL $\alpha$ -tag sequencing.** Amplified DBL $\alpha$ -  
1385 tag sequences were blasted against the ~2,400 genomes on varDB (Otto, 2019) to obtain  
1386 subclassification into DBL $\alpha$ 0/1/2 and prediction of adjacent head-structure NTS and CIDR do-  
1387 mains and their related binding phenotype. Proportion of each NTS and DBL $\alpha$  subclass as well  
1388 as CIDR domains grouped according to binding phenotype (CIDR $\alpha$ 1.1/4-8: EPCR-binding,  
1389 CIDR $\alpha$ 2-6: CD36-binding, CIDR $\beta$ / $\gamma$ / $\delta$ : unknown binding phenotype/rosetting) was calculated  
1390 and shown separately on the left, number of total reads and individual sequence cluster with  
1391  $n \geq 10$  sequences are shown on the right. Differences in the distribution among first-time in-  
1392 fected (blue) and pre-exposed individuals (grey) **(A)** as well as severe (red) and non-severe  
1393 cases (grey) **(B)** were tested using the Mann-Whitney U test. The boxes represent medians  
1394 with IQR; the whiskers depict minimum and maximum values (range) with outliers located out-  
1395 side the whiskers. Quantile regression was applied to look for differences between patient  
1396 groups on the level of domain main classes (left) and subdomains (right). Shown are median

1397 differences with 95%-confidence intervals of domains with values unequal 0. Domains with  
1398 positive values tend to be higher expressed in naïve (C) and severe patients (D).

1399

1400 **Figure 8: Correlation of *var* gene expression with antibody levels against head structure**  
1401 **CIDR domains.** Patient plasma samples (n=32) were subjected to Luminex analysis with 35  
1402 *PfEMP1* head structure CIDR domains. The panel includes EPCR-binding CIDR $\alpha$ 1 domains  
1403 (n = 19), CD36-binding CIDR $\alpha$ 2–6 domains (n = 12) and CIDR domains with unknown binding  
1404 phenotype (CIDR $\gamma$ 3: n = 1, CIDR $\delta$ 1: n = 3) as well as the minimal binding region of VAR2CSA  
1405 (VAR2). Box plots showing mean fluorescence intensities (MFI) extending from the 25<sup>th</sup> to the  
1406 75<sup>th</sup> percentiles with a line at the median indicate higher reactivity of the pre-exposed (A) and  
1407 non-severe cases (B) with all *PfEMP1* domains tested. Significant differences were observed  
1408 for recognition of CIDR $\alpha$ 2–6, CIDR $\delta$ 1 and CIDR $\gamma$ 3; VAR2CSA recognition differed only be-  
1409 tween severe and non-severe cases (Mann Whitney U test). Furthermore, the breadth of IgG  
1410 recognition (%) of CIDR domains for the different patient groups was calculated and shown as  
1411 a heat map (C).

1412

1413 **Figure 9: Differential all gene expression analysis.** Gene set enrichment analysis (GSEA)  
1414 of GO terms and KEGG pathways indicate gene sets deregulated in first-time infected malaria  
1415 patients. GO terms related to antigenic variation and host cell remodeling are significantly  
1416 down-regulated, only the KEGG pathway 03410 ‘base excision repair’ shows a significant up-  
1417 regulation in malaria-naïve patients (A). Log fold changes (logFC) for the 15 *P. falciparum*  
1418 genes assigned to the KEGG pathway 03410 ‘base excision repair’ are plotted with the six  
1419 significant hits marked with \* for p<0.05 and \*\* for p<0.01 (B).

1420

1421 **Table 1: Characteristics and classification of malaria patients.**

1422

1423 **Table 2: Patient groups data.**

1424

1425 **Table 3: *var* transcripts up- and down-regulated in first-time infected patients.**

1426

1427 **Table 4: *var* transcripts up- and down-regulated in severe cases.**

1428

1429 **Table 5: *var* domains defined by Rask *et al.* (Rask *et al.*, 2010) up- and down-regulated**  
1430 **in first-time infected patients.**

1431

1432 **Table 6: *var* domains defined by Rask *et al.* . (Rask *et al.*, 2010) up- and down-regulated**  
1433 **in severe cases.**

1434

1435 **Table 7: *var* blocks defined by Rask *et al.* . (Rask *et al*, 2010) up- and down-regulated in**  
1436 **first-time infected patients.**

1437

1438 **Table 8: *var* blocks defined by Rask *et al.* . (Rask *et al*, 2010) down-regulated in severe**  
1439 **cases.**

1440

1441 **Supplement**

1442

1443 **Supplement figure 1: Early immune response in mild and severe malaria within the naïve**  
1444 **patient cluster.** Antibody reactivity against individual antigens within the three subgroups 'naïve with mild symptoms', 'naïve with severe symptoms' and 'pre-exposed with mild symptoms'. Sera from all volunteers were assessed on protein microarrays and data normalized to control spots containing no antigen (no DNA control spots). Median reactivity of the mild infected malaria-naïve, severely infected malaria-naïve as well as the mild infected with pre-exposure to malaria are represented as bar-charts. IgG data is given for all 262 *P. falciparum* proteins spotted on the microarray representing 228 unique antigens (**A**). To estimate differences in immune response in mild and severe malaria within the malaria-naïve population, normalized IgG (**B**) and IgM (**C**) antibody responses were compared in the two subpopulations. Differentially recognized antigens ( $p < 0.05$  and fold change  $> 2$ ) are depicted in red.

1454

1455 **Supplement figure 2: Differential expression of the *var1*-allele forms and *var2csa* between patient groups.** RNA-seq reads from each patient were normalized against the number of mappable reads to the 3D7 genome and aligned to the *var1*-3D7 and *var1*-IT allele forms as well as *var2csa*. The resulting bigwig files were displayed in Artemis (Carver *et al*, 2012). Individual samples are colored according to the patient group: first-time infected in blue (A), severe in red (B) and the respective pre-exposed or non-severe samples in grey.

1461

1462 **Supplement figure 3: Comparison of the DBL $\alpha$ -tag sequencing with RNA-seq analysis.** DBL $\alpha$ -tag sequencing and RNA-seq data compared in Bland-Altman plots for all patients summarized (**A**) and for each individual patient (**B**), where the mean log expression of each gene is indicated on the X-axis and the log ratio between normalized DBL $\alpha$ -tag (% of reads) and RNA-seq values (% of RPKM from all contigs containing both DBL $\alpha$ -tag primer binding sites) on the y-axis. The mean (equal to bias) of all ratios (line) and the confidence interval (CI) of 95% (dotted lines) are indicated. Data points with negative values for one of the approaches are displayed in dependence of their mean log expression on top (DBL $\alpha$ -tag sequence clusters

1469



1470 not detected by RNA-seq) or bottom (RNA-seq contigs not found within DBL $\alpha$ -tag sequence  
1471 cluster) of the graph.

1472

1473 **Supplement figure 4: The base excision repair (KEGG:03410) in *P. falciparum*.**

1474 Orthologues present in *P. falciparum* are indicated by gene IDs, log fold changes (logFC) are  
1475 indicated by color code (red: up-regulated, blue: down-regulated) (A). Summary of logFC in  
1476 gene expression in first-time infected relative to pre-exposed patients and p-values for the  
1477 logFC.

1478

1479 **Supplement figure 5: RNA quality.** The Bioanalyzer automated RNA electrophoresis system  
1480 was used to characterize the total RNA quality prior library synthesis. The calculated RIN value  
1481 is provided, although this measurement is questionable for samples from mixed species. From  
1482 the four rRNA peaks visible in all samples, the inner peaks represent *P. falciparum* 18S and  
1483 28S rRNA, the outer peaks are of human origin.

1484 **Data S1: Sequences of assembled *var* contigs from all patient isolates.**

1485

1486 **Supplement table 1: Data from Luminex, mADRB, ELISA and protein microarray.** Sero-  
1487 prevalence of head-structure CIDR domains determined by applying a cut off from Danish  
1488 controls (mean + 2 STD) to the Luminex data.

1489

1490 **Supplement table 2: Raw read counts by sample for *H. sapiens*, *P. falciparum*, *var* exon  
1491 1 and percentage of reads that mapped either to *P. falciparum* or *var* exon 1 as well as  
1492 the number of assembled *var* contigs >500 bp in length.**

1493

1494 **Supplement table 3: Features of the assembled *var* fragments annotated in accordance  
1495 with Rask *et al.* . (Rask *et al*, 2010) and Tonkin-Hill *et al.* (Tonkin-Hill *et al*, 2018). The  
1496 reading frame used for translation is given after the contig ID, the position of each annotation  
1497 is provided by starting and ending amino acid followed by the p-value from the blast search  
1498 against the respective database. For annotations in accordance with Tonkin-Hill *et al.* (Tonkin-  
1499 Hill *et al*, 2018) either the short ID or 'NA' (not applicable) is listed at the end. Short IDs are  
1500 only available for significant differently expressed domains and blocks between severe and  
1501 non-severe cases (Tonkin-Hill *et al*, 2018).**

1502

1503 **Supplement table 4: Summary of *var* gene fragments assembled for each patient isolate  
1504 showing length, raw read counts, RPKM, blast hits, domain and block annotations in  
1505 accordance with Rask *et al.* . (Rask *et al*, 2010). The RPKM for the contigs was calculated  
1506 as number of mapped reads and normalized by the number of mapped reads against all**

1507 transcript in each isolate, respectively. Therefore, RPKM expression values are only valid to  
1508 compare within a single sample since RNA-seq reads were mapped only to the contigs of the  
1509 respective patient isolate using BWA-MEM (Li, 2013). Further, the amount of blast hits with  
1510 500 bp or 80% of overlap against the ~2400 samples from varDB (Otto, 2019) with an identity  
1511 cutoff of 98%. Further hits of 1 kb (>98% identity) against the *var* genes from the 15 reference  
1512 genomes (Otto *et al*, 2018a) are listed. The last two column show the annotations from Rask  
1513 *et al*. (Rask *et al*, 2010) associated to each contig.

1514

1515 **Supplement table 5: Log transformed normalized Salmon read counts for assembled**  
1516 ***var* transcripts, TPM for collapsed domains and homology blocks from each patient iso-**  
1517 **late.** Normalized counts and TPM values calculated for transcripts, domains and blocks with  
1518 expression in at least three patient isolates with more than five read counts.

1519

1520 **Supplement table 6: Differently expressed *var* transcripts, domains and homology**  
1521 **blocks between first-time infected and pre-exposed patient samples.**

1522

1523 **Supplement table 7: Differently expressed *var* transcripts, domains and homology**  
1524 **blocks between severe and non-severe patient samples.**

1525

1526 **Supplement table 8: Data from DBL $\alpha$ -tag sequencing.**

1527

1528 **Supplement table 9: Differentially expressed genes excluding *var* genes (all gene anal-**  
1529 **ysis) between first-time infected and pre-exposed patient samples.**

1530

1531 **Supplement table 10: Differentially expressed genes excluding *var* genes (all gene anal-**  
1532 **ysis) between severe and non-severe patient samples.**

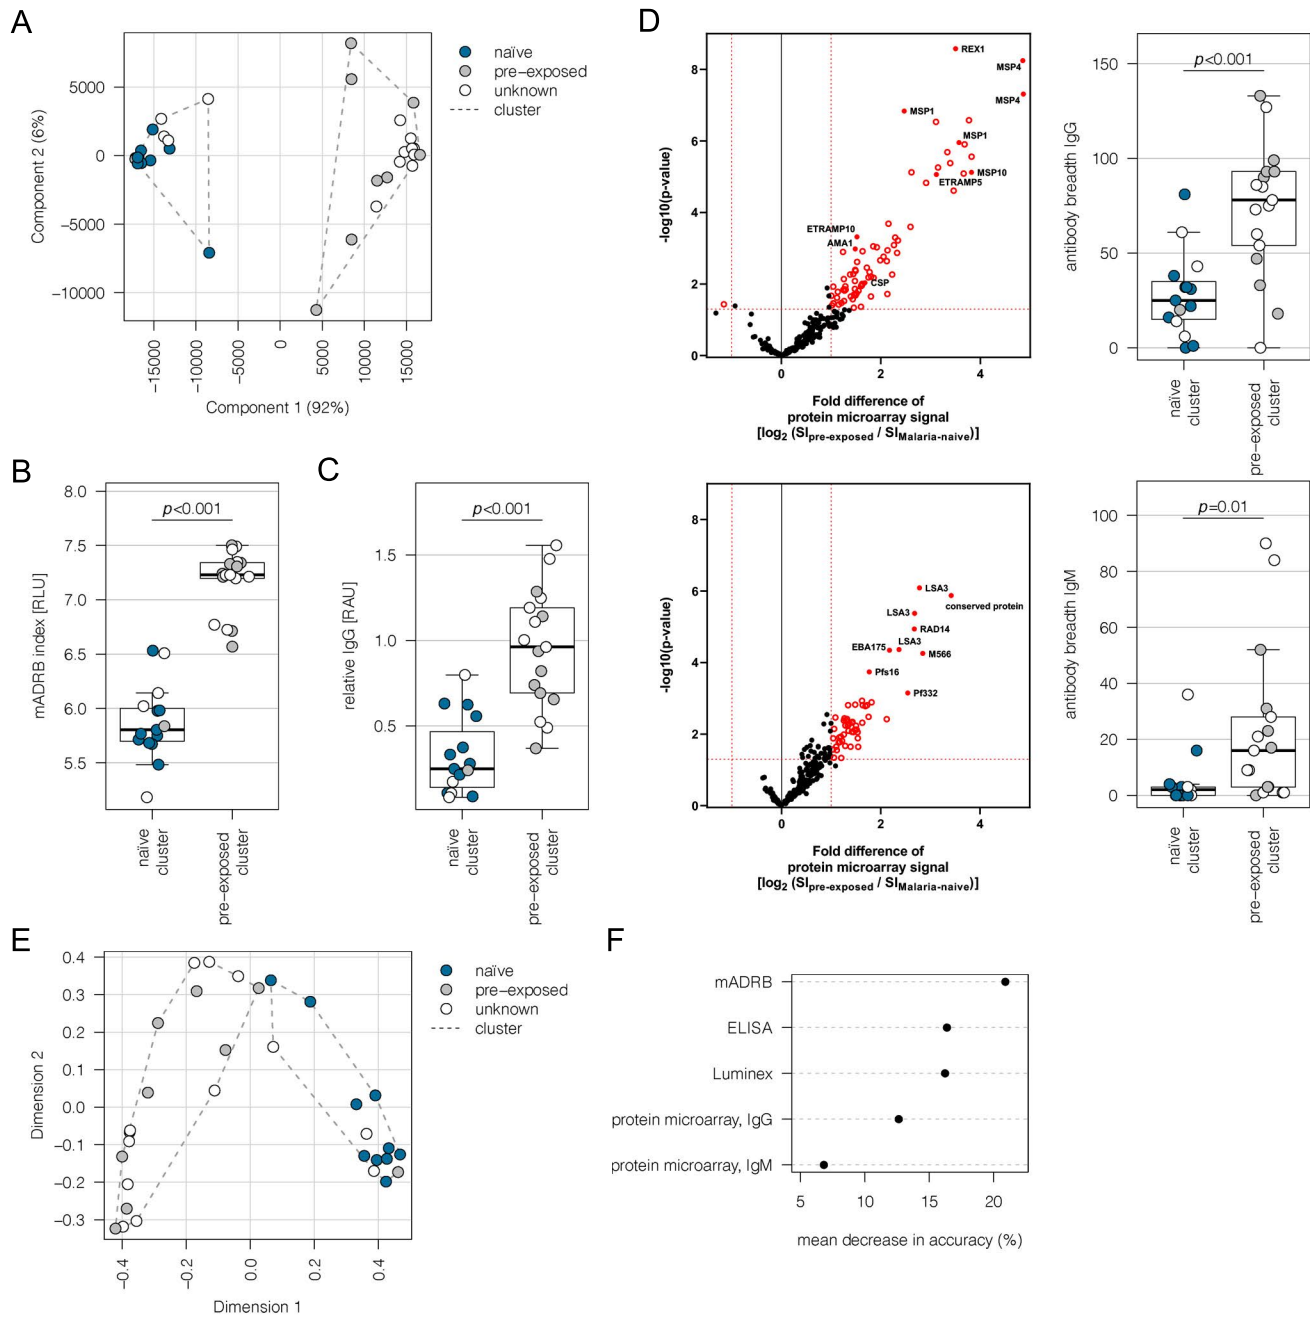

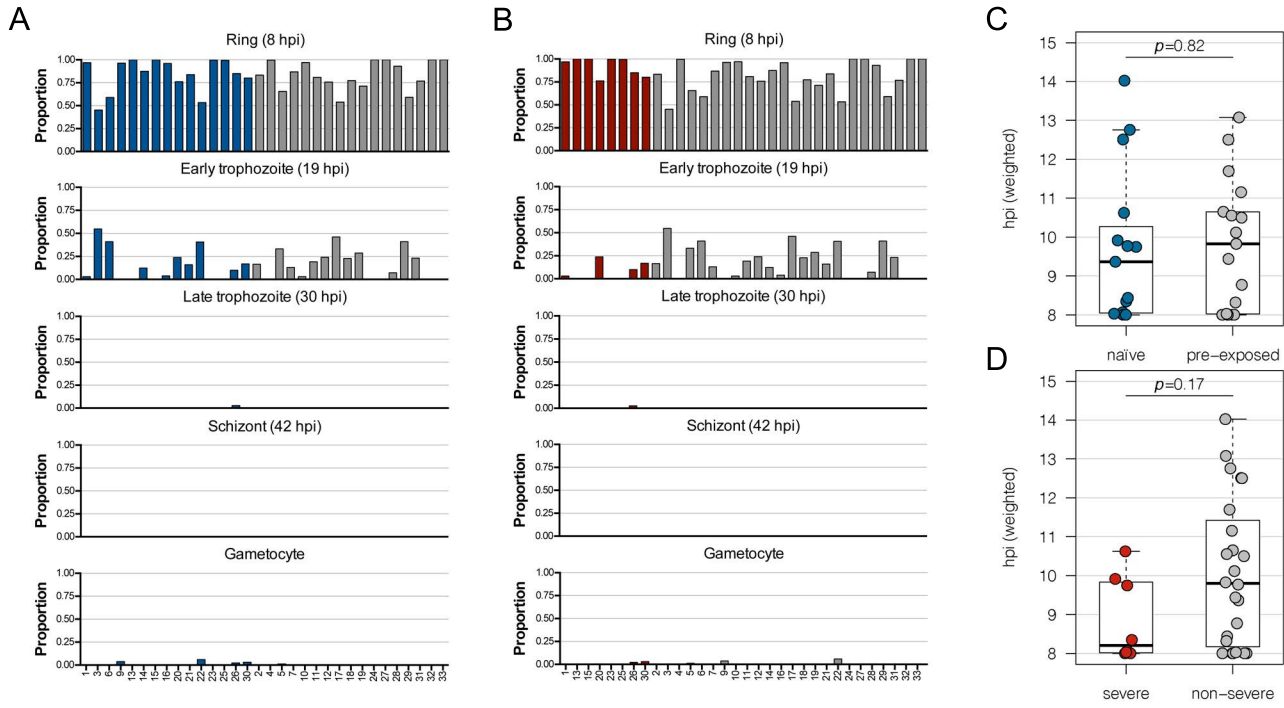

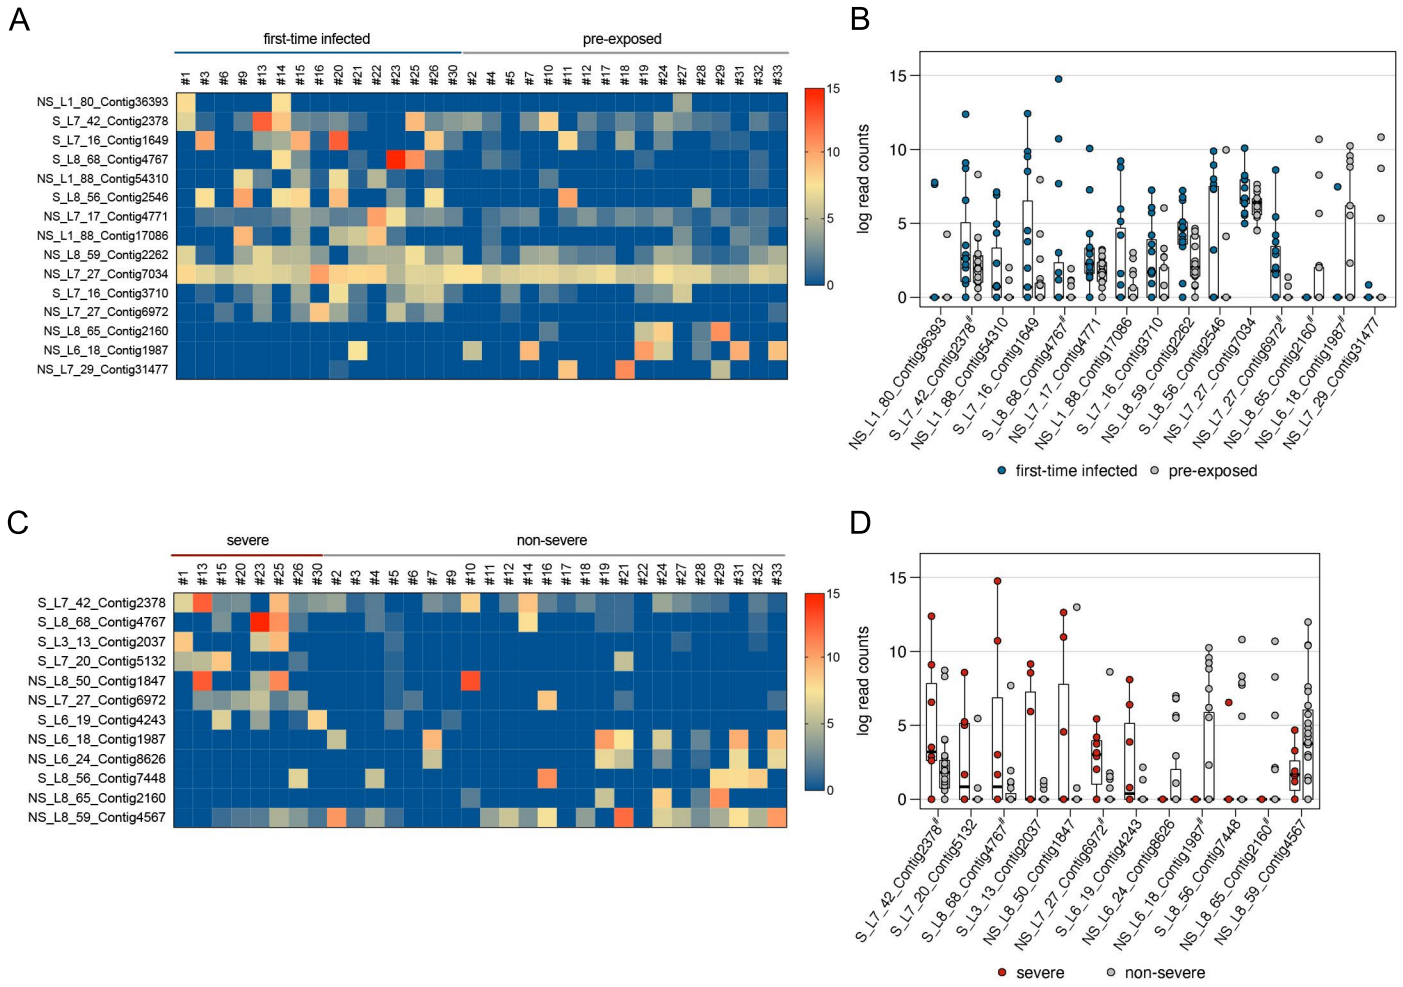

**A**

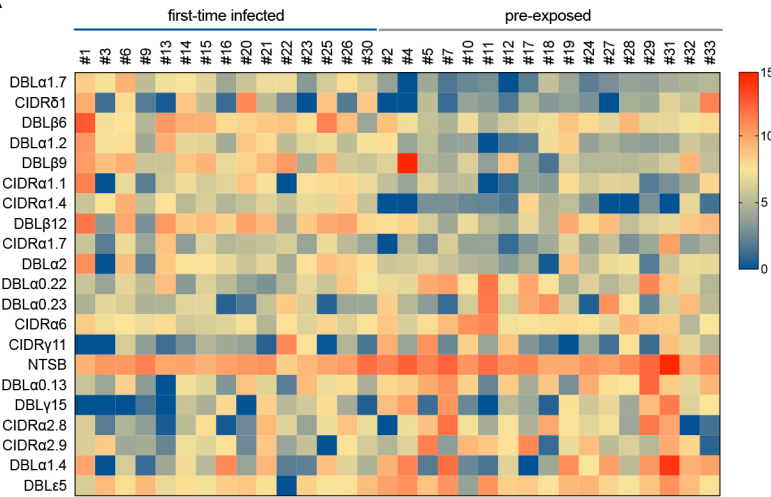

**B**

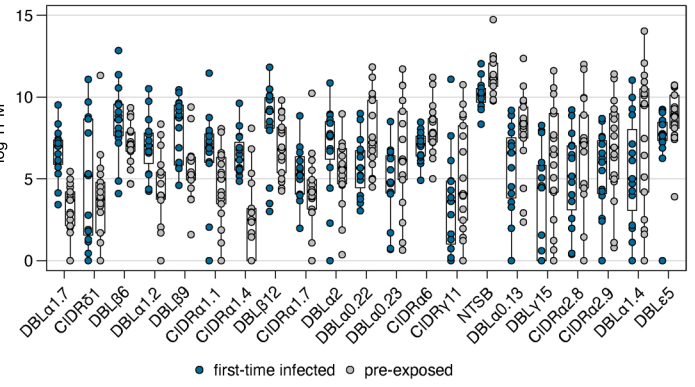

**C**

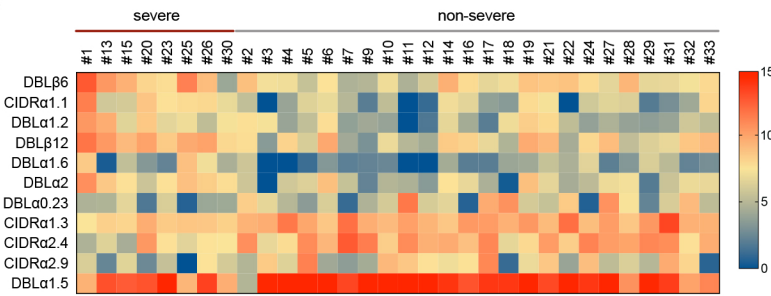

**D**

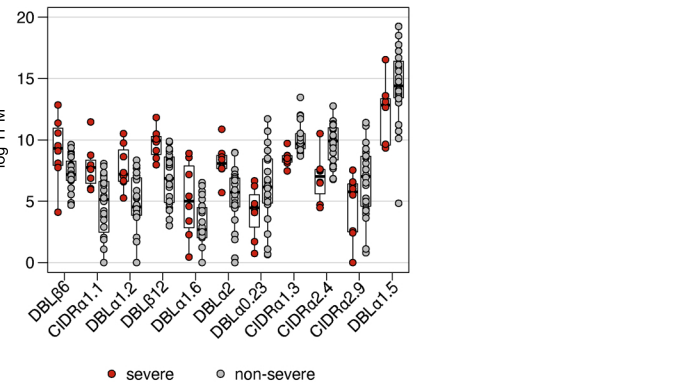

**E**

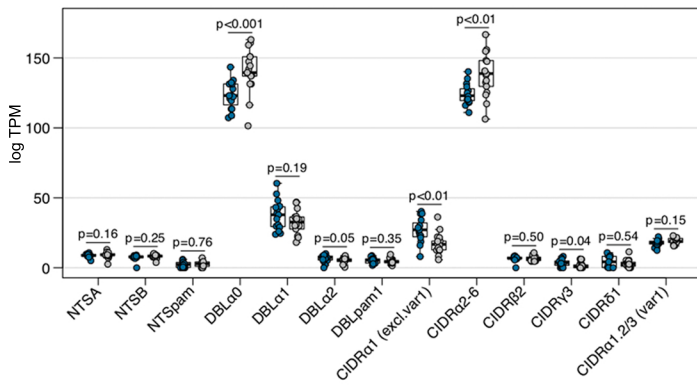

**F**

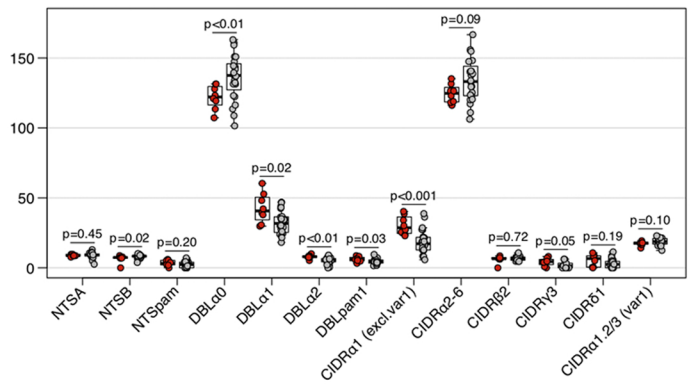

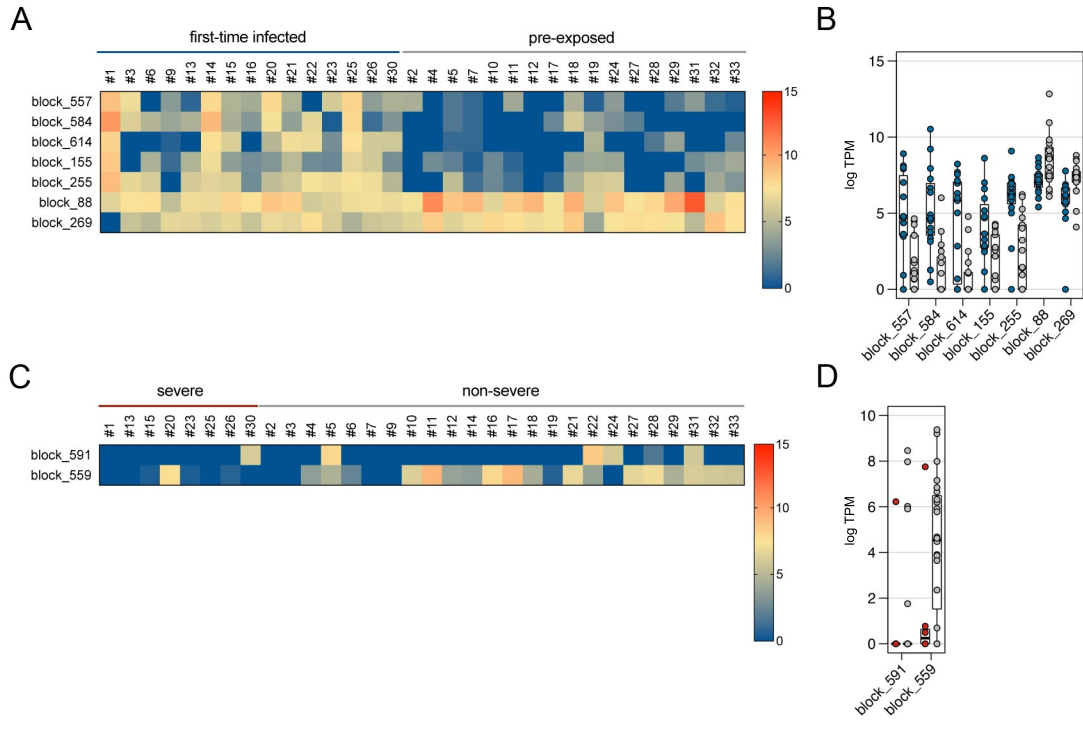

**A**

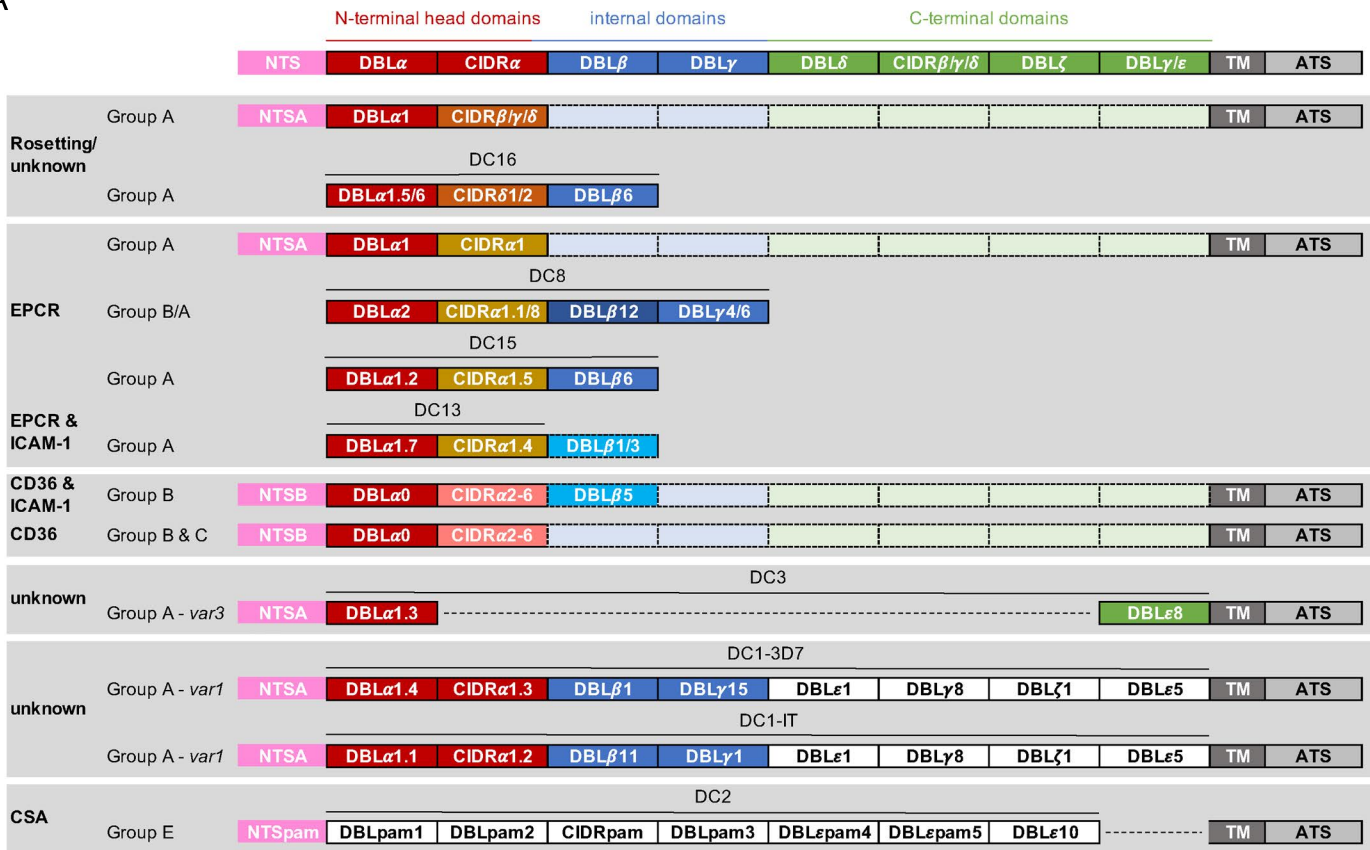

**B**

| Binding phenotype | DC        | first-time infected – pre-exposed                                  |                                                                                                                                                    |                                                                                          | severe – non-severe                                                                                            |                                                                                        |                                 |
|-------------------|-----------|--------------------------------------------------------------------|----------------------------------------------------------------------------------------------------------------------------------------------------|------------------------------------------------------------------------------------------|----------------------------------------------------------------------------------------------------------------|----------------------------------------------------------------------------------------|---------------------------------|
|                   |           | Transcripts                                                        | Domains                                                                                                                                            | Homology blocks                                                                          | Transcripts                                                                                                    | Domains                                                                                | Homology blocks                 |
| Rosetting/unknown | DC16      |                                                                    | CIDR $\delta$ 1<br>DBL $\beta$ 6                                                                                                                   | 155 (NTSA)                                                                               |                                                                                                                | DBL $\alpha$ 1.6, DBL $\alpha$ 1.5<br>DBL $\beta$ 6                                    |                                 |
| EPCR              | DC8, DC15 |                                                                    | DBL $\alpha$ 1.2, DBL $\alpha$ 2<br>CIDR $\alpha$ 1.1, CIDR $\alpha$ 1.7<br>DBL $\beta$ 6, DBL $\beta$ 12<br>DBL $\alpha$ 1.7<br>CIDR $\alpha$ 1.4 | 155 (NTSA)<br><br><br>584 (DBL $\beta$ 3)                                                | S_L7_20_Contig5132                                                                                             | DBL $\alpha$ 1.2, DBL $\alpha$ 2<br>CIDR $\alpha$ 1.1<br>DBL $\beta$ 6, DBL $\beta$ 12 |                                 |
| EPCR & ICAM-1     | DC13      | S_L8_68_Contig4767                                                 |                                                                                                                                                    |                                                                                          | S_L8_68_Contig4767<br>S_L3_13_Contig2037                                                                       |                                                                                        |                                 |
| CD36 & ICAM-1     |           | NS_L1_88_Contig17086                                               | NTSB                                                                                                                                               | 88 (DBL $\alpha$ 0)                                                                      |                                                                                                                | DBL $\alpha$ 0.23                                                                      | 591 (CIDR $\beta/\gamma$ -ATSB) |
| CD36              |           | NS_L7_29_Contig31477                                               | DBL $\alpha$ 0.13, DBL $\alpha$ 0.22, DBL $\alpha$ 0.23<br>CIDR $\alpha$ 2.8, CIDR $\alpha$ 2.9, CIDR $\alpha$ 6                                   | 69 (ATSB)                                                                                |                                                                                                                | CIDR $\alpha$ 2.4, CIDR $\alpha$ 2.9                                                   |                                 |
| unknown           | DC3       | S_L7_16_Contig3710                                                 |                                                                                                                                                    | 155 (NTSA)                                                                               |                                                                                                                |                                                                                        |                                 |
| unknown           | DC1-3D7   | NS_L8_65_Contig2160<br>NS_L6_18_Contig1987                         | DBL $\alpha$ 1.4<br>DBL $\gamma$ 15<br>DBL $\epsilon$ 5                                                                                            |                                                                                          | NS_L6_24_Contig8626<br>NS_L6_18_Contig1987<br>S_L8_56_Contig7448<br>NS_L8_65_Contig2160<br>NS_L8_59_Contig4567 | CIDR $\alpha$ 1.3                                                                      |                                 |
|                   | DC1-IT    | S_L7_16_Contig1649<br>S_L8_56_Contig2546<br>NS_L1_80_Contig36393   |                                                                                                                                                    | 155 (NTSA)                                                                               |                                                                                                                |                                                                                        |                                 |
| CSA               | DC2       | S_L7_42_Contig2378,<br>NS_L8_59_Contig2262                         |                                                                                                                                                    |                                                                                          | S_L7_42_Contig2378<br>NS_L8_50_Contig1847                                                                      |                                                                                        |                                 |
| others            |           | NS_L1_88_Contig54310<br>NS_L7_17_Contig4771<br>NS_L7_27_Contig7034 | DBL $\beta$ 9<br>CIDR $\gamma$ 11                                                                                                                  | 557 (DBL $\beta$ -DBL $\gamma$ )<br>614 (DBL $\beta$ 12/3)<br>255 (DBL $\beta$ 12/3/1/5) | S_L6_19_Contig4243                                                                                             |                                                                                        | 559 (DBL $\zeta$ 6)             |





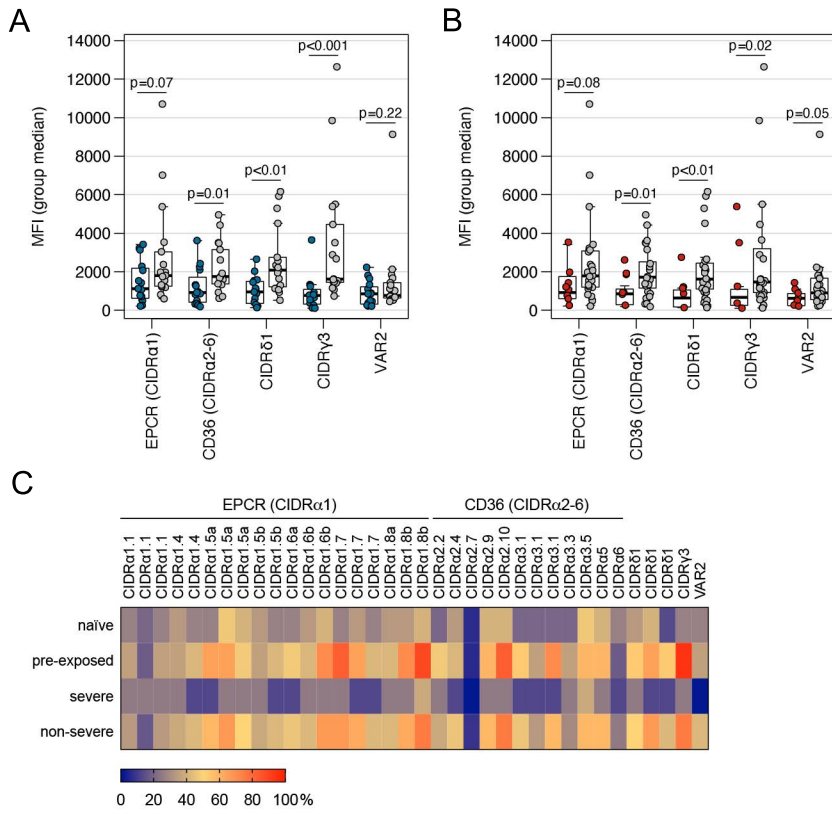

**A**

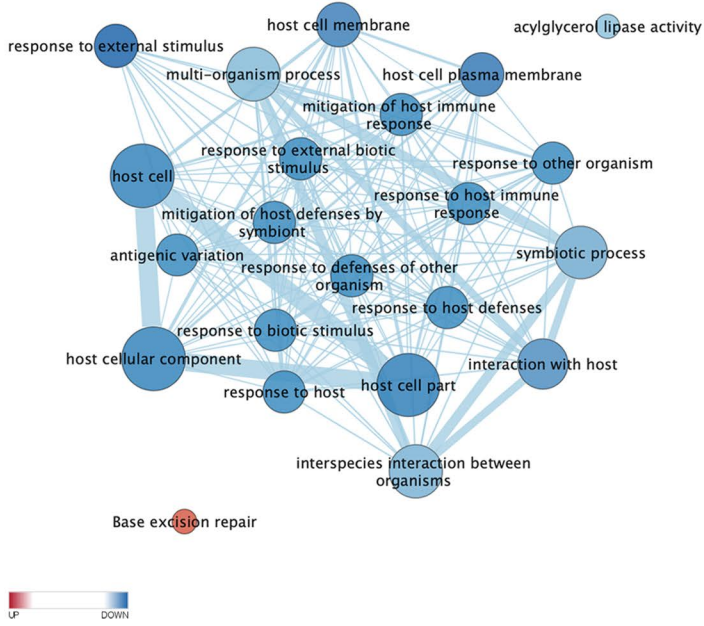

**B**

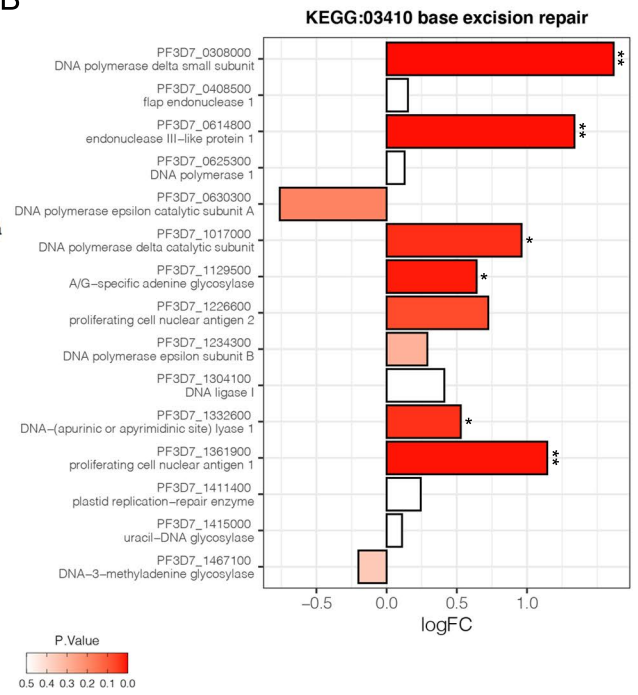

**Table 1: Characteristics of each patient.**

| ID # | Parasitemia | Symptoms                                                                                                                            | Classification          |
|------|-------------|-------------------------------------------------------------------------------------------------------------------------------------|-------------------------|
| 1    | 1%          | High fever (40,2°C), liver dysfunction (transaminases ↑↑), developed 7% parasitemia with circulating schizonts upon hospitalization | Naïve, severe           |
| 2    | 1%          | Fever (38.5°)                                                                                                                       | Pre-exposed, non-severe |
| 3    | >5%         | Fever, chill                                                                                                                        | Naïve, non-severe       |
| 4    | 1.5%        | Fever, chill, headache, joint pain                                                                                                  | Pre-exposed, non-severe |
| 5    | 1.5%        | Fever, chill                                                                                                                        | Pre-exposed, non-severe |
| 6    | 0.5%        | Fever (39°C), diarrhea, headache, liver dysfunction (transaminases ↑↑)                                                              | Naïve, non-severe       |
| 7    | 2.5%        | Fever, 'malaria-associated symptoms'                                                                                                | Pre-exposed, non-severe |
| 9    | 7%          | Fever, chill, joint pain, headache, liver dysfunction (transaminases ↑↑)                                                            | Naïve, non-severe       |
| 10   | 2%          | Fever (39°C)                                                                                                                        | Pre-exposed, non-severe |
| 11   | 3%          | Fever, chill                                                                                                                        | Pre-exposed, non-severe |
| 12   | 0.5%        | Fever, chill, joint pain, headache, diarrhea, abdominal pain                                                                        | Pre-exposed, non-severe |
| 13   | 35%         | Fever, multiple organ failure, metabolic acidosis, death                                                                            | Naïve, severe           |
| 14   | <1%         | Fever, diarrhea                                                                                                                     | Naïve, non-severe       |
| 15   | 35%         | Fever, cerebral and liver dysfunction (transaminases ↑↑)                                                                            | Naïve, severe           |
| 16   | 8%          | Fever, chill, headache                                                                                                              | Naïve, non-severe       |
| 17   | 2.5%        | Fever, diarrhea, headache                                                                                                           | Pre-exposed, non-severe |
| 18   | 7%          | Fever, diarrhea, headache, abdominal pain                                                                                           | Pre-exposed, non-severe |
| 19   | 0.8%        | No clinical data                                                                                                                    | Pre-exposed, non-severe |
| 20   | 40%         | Fever, diarrhea, cerebral dysfunction, renal failure (creatinine ↑↑↑), anemia                                                       | Naïve, severe           |
| 21   | 7%          | Fever, headache                                                                                                                     | Naïve, non-severe       |
| 22   | 3%          | Fever (up to 41°C), headache, abdominal cramps                                                                                      | Naïve, non-severe       |
| 23   | 12%         | Fever, headache, multiple organ dysfunction (renal: creatinine ↑↑, liver: transaminases ↑, cerebrum: aphasia, ataxia)               | Naïve, severe           |
| 24   | 3%          | Fever, diarrhea                                                                                                                     | Pre-exposed, non-severe |
| 25   | 48%         | Fever, multiple organ failure, liver dysfunction (transaminases ↑), lactate acidosis                                                | Naïve, severe           |
| 26   | 7%          | Fever, headache, cerebral dysfunction                                                                                               | Naïve, severe           |
| 27   | 0.2%        | Fever, diarrhea                                                                                                                     | Pre-exposed, non-severe |
| 28   | 3.5%        | Fever, chill                                                                                                                        | Pre-exposed, non-severe |
| 29   | 8%          | Fever, headache, diarrhea                                                                                                           | Pre-exposed, non-severe |
| 30   | 11%         | Fever, headache, diarrhea, cerebral dysfunction, metabolic acidosis                                                                 | Naïve, severe           |
| 31   | 1%          | No clinical data                                                                                                                    | Pre-exposed, non-severe |
| 32   | 2%          | Fever, chill, diarrhea, headache                                                                                                    | Pre-exposed, non-severe |
| 33   | 3.5%        | Fever, diarrhea, abdominal pain                                                                                                     | Pre-exposed, non-severe |

**Table 2: Patient data.**

|                                                                       | First-time infected (naïve)<br>(n=15)               | Pre-exposed<br>(n=17)                                | Severe malaria<br>(n=8)                              | Non-severe malaria<br>(n=24)                         |
|-----------------------------------------------------------------------|-----------------------------------------------------|------------------------------------------------------|------------------------------------------------------|------------------------------------------------------|
| Female sex<br>[n (%)]                                                 | 6 (40%)                                             | 3 (18%)                                              | 3 (38%)                                              | 6 (25%)                                              |
| Patient age in years<br>[median (IQR)]                                | 34 (26–53)                                          | 38 (31–45)                                           | 47 (27–59)                                           | 35 (31–46)                                           |
| Hb g/dl<br>[median (IQR)]*                                            | 13.1 (12.1–14.6)                                    | 12.2 (11.8–13.1)                                     | 12.1 (11.6–13.0)                                     | 13.2 (12.0–14.3)                                     |
| Parasitemia %<br>[median (IQR)]                                       | 7.0 (4.0–23.5)                                      | 2.0 (1.0–3.0)                                        | 23.5 (10.0–36.3)                                     | 2.5 (1.0–3.9)                                        |
| MSP1<br>[n (%)]                                                       | 1: 10 (66%)<br>2: 1 (7%)<br>3: 3 (20%)<br>4: 1 (7%) | 1: 12 (71%)<br>2: 3 (18%)<br>3: 2 (12%)<br>4: 0 (0%) | 1: 5 (63%)<br>2: 1 (13%)<br>3: 1 (13%)<br>4: 1 (13%) | 1: 17 (71%)<br>2: 3 (13%)<br>3: 4 (17%)<br>4: 0 (0%) |
| Total reads<br>[median (IQR)]                                         | 41,341,958<br>(37,804,417–43,659,324)               | 41,259,082<br>(36,921,362–43,904,892)                | 42,458,431<br>(38,520,154–49,561,881)                | 41,050,568<br>(36,920,201–44,030,863)                |
| <i>P. falciparum</i> reads<br>[median (IQR)]                          | 35,940,843<br>(34,099,395–39,090,313)               | 37,065,150<br>(28,707,096–38,070,441)                | 37,980,501<br>(35,195,959–45,563,701)                | 35,559,157<br>(29,711,534–37,774,576)                |
| Number of assembled<br><i>var</i> contigs (>500 bp)<br>[median (IQR)] | 220.5<br>(169.3–320.8)                              | 165.5<br>(121.3–251.5)                               | 292<br>(210–404)                                     | 174<br>(121–259)                                     |
| Parasite age [median<br>(IQR)]                                        | 9.4<br>(8.0–10.3)                                   | 9.8<br>(8.0–10.6)                                    | 8.2<br>(8.0–9.8)                                     | 9.8<br>(8.2–11.4)                                    |

Sides of infection: Ghana (n=10), Nigeria (n=6), Guinea (n=3), Tansania (n=2), Kongo (n=2), other African countries (n=10), Germany (n=1), unknown (n=1)

\* n=21

**Table 3: Var transcripts up- and downregulated in first-time infected patients.**

|         | Transcript           | Length (bp) | Log2 fold change | p <sub>adj</sub> | Comment          | Associated var group | Rask domain composition                                                                               |
|---------|----------------------|-------------|------------------|------------------|------------------|----------------------|-------------------------------------------------------------------------------------------------------|
|         | NS_L1_80_Contig36393 | 2,536       | 23.04            | 2.28e-11         | <i>var1</i>      | A                    | DBL $\gamma$ 8-DBL $\zeta$ 1-DBL $\epsilon$ 5                                                         |
|         | S_L7_42_Contig2378#  | 8,504       | 4.38             | 0.0009           | <i>var2csa</i>   | E                    | NTSpam-DBLpam1-DBLpam2-CIDRpam-DBLpam3-DBL $\epsilon$ pam4-DBL $\epsilon$ pam5-DBL $\epsilon$ 10      |
|         | NS_L1_88_Contig54310 | 2,975       | 6.31             | 0.0027           |                  | B                    | DBL $\delta$ 1-CIDR $\beta$ 1                                                                         |
|         | S_L7_16_Contig1649   | 2,244       | 6.31             | 0.0050           | <i>var1-IT</i>   | A                    | NTSA-DBL $\alpha$ 1.1-CIDR $\alpha$ 1.2                                                               |
| ↑ naïve | S_L8_68_Contig4767#  | 6,006       | 8.45             | 0.0068           | ICAM-1 binding?  | B                    | DBL $\beta$ 5-DBL $\beta$ 5-DBL $\delta$ 1-CIDR $\beta$ 1                                             |
|         | NS_L7_17_Contig4771  | 2,561       | 2.24             | 0.0243           |                  | B                    | DBL $\delta$ 1-CIDR $\gamma$ 5                                                                        |
|         | NS_L1_88_Contig17086 | 3,568       | 5.13             | 0.0243           | CD36-binding     | B                    | CIDR $\alpha$ 3.4-DBL $\delta$ 1-CIDR $\beta$ 5                                                       |
|         | S_L7_16_Contig3710   | 3,037       | 3.74             | 0.0319           | DC3, <i>var3</i> | A                    | DBL $\alpha$ 1.3-DBL $\epsilon$ 8                                                                     |
|         | NS_L8_59_Contig2262  | 5,189       | 2.15             | 0.0323           | <i>var2csa</i>   | E                    | DBLpam3-DBL $\epsilon$ pam4-DBL $\epsilon$ pam5-DBL $\epsilon$ 10                                     |
|         | S_L8_56_Contig2546   | 804         | 6.58             | 0.0339           | <i>var1-IT</i>   | A                    | NTSA-DBL $\alpha$ 1.1                                                                                 |
|         | NS_L7_27_Contig7034  | 1,410       | 1.26             | 0.0366           |                  | B                    | CIDR $\beta$ 5                                                                                        |
|         | NS_L7_27_Contig6972# | 724         | 4.50             | 0.0403           |                  |                      | not applicable                                                                                        |
|         | NS_L8_65_Contig2160# | 7,254       | -22.85           | 2.28e-11         | <i>var1-3D7</i>  | A                    | NTSA-DBL $\alpha$ 1.4-CIDR $\alpha$ 1.3-DBL $\beta$ 1-DBL $\gamma$ 15-DBL $\epsilon$ 1-DBL $\gamma$ 8 |
| ↓ naïve | NS_L6_18_Contig1987# | 549         | -9.63            | 0.0027           | <i>var1-3D7</i>  | A                    | NTSA-DBL $\alpha$ 1.4                                                                                 |
|         | NS_L7_29_Contig31477 | 4,497       | -8.92            | 0.0479           | CD36-binding     | B/C                  | DBL $\alpha$ 0.20-CIDR $\alpha$ 3.1-DBL $\delta$ 1-CIDR $\beta$ 6                                     |

# also found in severe cases up-/downregulated

**Table 4: Var transcripts up- and downregulated in severe cases.**

|          | Transcript           | Length (bp) | Log2 fold change | p <sub>adj</sub> | Comment               | Associated var group | Rask domain composition                                                                                                              |
|----------|----------------------|-------------|------------------|------------------|-----------------------|----------------------|--------------------------------------------------------------------------------------------------------------------------------------|
|          | S_L7_42_Contig2378#  | 8,504       | 4.79             | 4.61e-5          | <i>var2csa</i>        | E                    | NTSpam-DBLpam1-DBLpam2-CIDRpam-DBLpam3-DBL $\epsilon$ pam4-DBL $\epsilon$ pam5-DBL $\epsilon$ 10                                     |
|          | S_L7_20_Contig5132   | 6,276       | 10.72            | 0.0007           | EPCR- & gC1qR binding | A                    | DBL $\alpha$ 1.2-CIDR $\alpha$ 1.6-DBL $\beta$ 12-DBL $\gamma$ 6-DBL $\delta$ 1                                                      |
| ↑ severe | S_L8_68_Contig4767#  | 6,006       | 7.85             | 0.0076           | ICAM-1 binding?       | B                    | DBL $\beta$ 5-DBL $\beta$ 5-DBL $\delta$ 1-CIDR $\beta$ 1                                                                            |
|          | S_L3_13_Contig2037   | 1,807       | 8.75             | 0.0234           | ICAM-1 binding?       | A/B                  | DBL $\beta$ 5                                                                                                                        |
|          | NS_L8_50_Contig1847  | 8,254       | 12.91            | 0.0319           | <i>var2csa</i>        | E                    | NTSpam-DBLpam1-DBLpam2-CIDRpam-DBLpam3-DBL $\epsilon$ pam4-DBL $\epsilon$ pam5-DBL $\epsilon$ 10                                     |
|          | NS_L7_27_Contig6972# | 724         | 5.09             | 0.0347           |                       |                      | not applicable                                                                                                                       |
|          | S_L6_19_Contig4243   | 5,681       | 7.64             | 0.0364           |                       | A/B                  | DBL $\gamma$ 17-DBL $\gamma$ 10-DBL $\delta$ 4-CIDR $\delta$ 1                                                                       |
|          | NS_L6_24_Contig8626  | 1,175       | -20.35           | 9.20e-17         | <i>var1-3D7</i>       | A                    | NTSA-DBL $\alpha$ 1.4                                                                                                                |
|          | NS_L6_18_Contig1987# | 549         | -25.45           | 7.13e-15         | <i>var1-3D7</i>       | A                    | NTSA-DBL $\alpha$ 1.4                                                                                                                |
| ↓ severe | S_L8_56_Contig7448   | 3,570       | -23.55           | 1.00e-8          | <i>var1-3D7</i>       | A                    | NTSA-DBL $\alpha$ 1.4-CIDR $\alpha$ 1.3-DBL $\beta$ 1                                                                                |
|          | NS_L8_65_Contig2160# | 7,254       | -22.46           | 1.03e-8          | <i>var1-3D7</i>       | A                    | NTSA-DBL $\alpha$ 1.4-CIDR $\alpha$ 1.3-DBL $\beta$ 1-DBL $\gamma$ 15-DBL $\epsilon$ 1-DBL $\gamma$ 8                                |
|          | NS_L8_59_Contig4567  | 10,201      | -5.04            | 0.0234           | <i>var1-3D7</i>       | A                    | NTSA-DBL $\alpha$ 1.4-CIDR $\alpha$ 1.3-DBL $\beta$ 1-DBL $\gamma$ 15-DBL $\epsilon$ 1-DBL $\gamma$ 8-DBL $\zeta$ 1-DBL $\epsilon$ 5 |

# also found in naïve cases up-/downregulated

**Table 5: Var domains up- and downregulated in first-time infected patients.**

|         | Rask domain                    | Log2 fold change | p <sub>adj</sub> | Comment             | Associated var group |
|---------|--------------------------------|------------------|------------------|---------------------|----------------------|
| ↑ naïve | DBL $\alpha$ 1.7               | 3.52             | 6.36e-8          | DC13                | A                    |
|         | CIDR $\delta$ 1                | 3.95             | 0.0003           | DC16, rosetting     | A                    |
|         | DBL $\beta$ 6 <sup>#</sup>     | 2.45             | 0.0016           | DC15, DC16          | A                    |
|         | DBL $\alpha$ 1.2 <sup>#</sup>  | 2.30             | 0.0092           | DC15                | A                    |
|         | DBL $\beta$ 9                  | 2.13             | 0.0092           | DC5, PECAM1-binding | A                    |
|         | CIDR $\alpha$ 1.1 <sup>#</sup> | 2.38             | 0.0229           | DC8, EPCR-binding   | B                    |
|         | CIDR $\alpha$ 1.4              | 2.28             | 0.0298           | DC13, EPCR-binding  | A                    |
|         | DBL $\beta$ 12 <sup>#</sup>    | 1.77             | 0.0381           | DC8, gC1qr-binding  | B                    |
|         | CIDR $\alpha$ 1.7              | 1.64             | 0.0425           | EPCR-binding        | A                    |
|         | DBL $\alpha$ 2 <sup>#</sup>    | 1.86             | 0.0425           | DC8                 | B                    |
|         | DBL $\alpha$ 0.22              | -2.54            | 0.0035           |                     | B, C                 |
|         | DBL $\alpha$ 0.23 <sup>#</sup> | -3.03            | 0.0035           |                     | B, C                 |
| ↓ naïve | CIDR $\alpha$ 6                | -1.68            | 0.0092           | DC22, CD36-binding  | B, C                 |
|         | CIDR $\gamma$ 11               | -3.11            | 0.0092           |                     | B, C                 |
|         | NTSB                           | -1.55            | 0.0105           |                     | B, C                 |
|         | DBL $\alpha$ 0.13              | -2.28            | 0.0216           |                     | B                    |
|         | DBL $\gamma$ 15                | -2.77            | 0.0381           | DC1, var1-3D7       | A, var1              |
|         | CIDR $\alpha$ 2.8              | -2.41            | 0.0425           | CD36-binding        | B                    |
|         | CIDR $\alpha$ 2.9 <sup>#</sup> | -2.15            | 0.0425           | CD36-binding        | B                    |
|         | DBL $\alpha$ 1.4               | -2.58            | 0.0425           | DC1/4, var1-3D7     | A, var1              |
|         | DBL $\epsilon$ 5               | -1.35            | 0.0499           | DC1, var1           | A, var1              |

# also found in severe cases up-/downregulated



**Table 6: Var domains up- and downregulated in severe cases.**

|             | Rask domain | Log2 fold change | p <sub>adj</sub> | Comment              | Associated var group |
|-------------|-------------|------------------|------------------|----------------------|----------------------|
| ↑<br>severe | DBLβ6#      | 2.87             | 0.001            | DC15, DC16           | A                    |
|             | CIDRα1.1#   | 3.02             | 0.009            | DC8, EPCR-binding    | B                    |
|             | DBLα1.2#    | 2.49             | 0.022            | DC15/(DC8)           | A                    |
|             | DBLβ12#     | 2.19             | 0.023            | DC8, gC1qr-binding   | B                    |
|             | DBLα1.6     | 2.89             | 0.023            | DC16                 | A                    |
|             | DBLα2#      | 2.23             | 0.042            | DC8                  | B                    |
| ↓<br>severe | DBLα0.23#   | -3.61            | 0.006            |                      | B, C                 |
|             | CIDRα1.3    | -2.09            | 0.006            | DC1, <i>var1-3D7</i> | A, <i>var1</i>       |
|             | CIDRα2.4    | -2.31            | 0.009            | CD36-binding         | B                    |
|             | CIDRα2.9#   | -2.74            | 0.039            | CD36-binding         | B                    |
|             | DBLα1.5     | -2.64            | 0.042            | DC16, rosetting      | A                    |

# also found in naïve cases up-/downregulated

**Table 7: Var blocks up- and downregulated in first-time infected patients.**

|         | Rask block | Log2 fold change | $p_{adj}$ | Comment                                                                               | Associated var group | Frequence on VarDom 1.0 server |
|---------|------------|------------------|-----------|---------------------------------------------------------------------------------------|----------------------|--------------------------------|
|         | 557        | 4.33             | 0.0003    | interdomain (DBL $\beta$ -DBL $\gamma$ )                                              | B                    | 5                              |
|         | 584        | 4.90             | 0.0003    | DBL $\beta$ 3                                                                         | A                    | 5                              |
| ↑ naïve | 614        | 4.59             | 0.0174    | DBL $\beta$ (6x DBL $\beta$ 12, 1x DBL $\beta$ 3)                                     | A, B/A               | 7                              |
|         | 155        | 3.03             | 0.0427    | NTSA                                                                                  | A                    | 37                             |
|         | 255        | 2.79             | 0.0427    | DBL $\beta$ (8x DBL $\beta$ 12, 6x DBL $\beta$ 3, 3x DBL $\beta$ 1, 1x DBL $\beta$ 5) | A, B/A               | 18                             |
| ↓ naïve | 88         | -1.41            | 0.0427    | DBL $\alpha$ 0                                                                        | B, C                 | 75                             |
|         | 269        | -1.26            | 0.0446    | ATSB                                                                                  | B, C                 | 16                             |

**Table 8: Var blocks downregulated in severe cases.**

|             | Rask block | Log2 fold change | $p_{adj}$  | Comment                                     | Associated var group | Frequency on VarDom 1.0 server |
|-------------|------------|------------------|------------|---------------------------------------------|----------------------|--------------------------------|
| ↓<br>severe | 591        | -23.93           | 3.90E-12   | Interdomain (CIDR $\beta$ / $\gamma$ -ATSB) | B                    | 5                              |
|             | 559        | -4.62            | 0.03999292 | DBL $\zeta$ 6                               | B                    | 5                              |
