# Supplementary material for: Gene expression profiling of malaria parasites reveals common virulence gene expression in adult first-time infected patients and severe cases
Source: bioRxiv or medRxiv preprint supplement (doi:10.1101/2020.11.13.381137), 2021-03-23

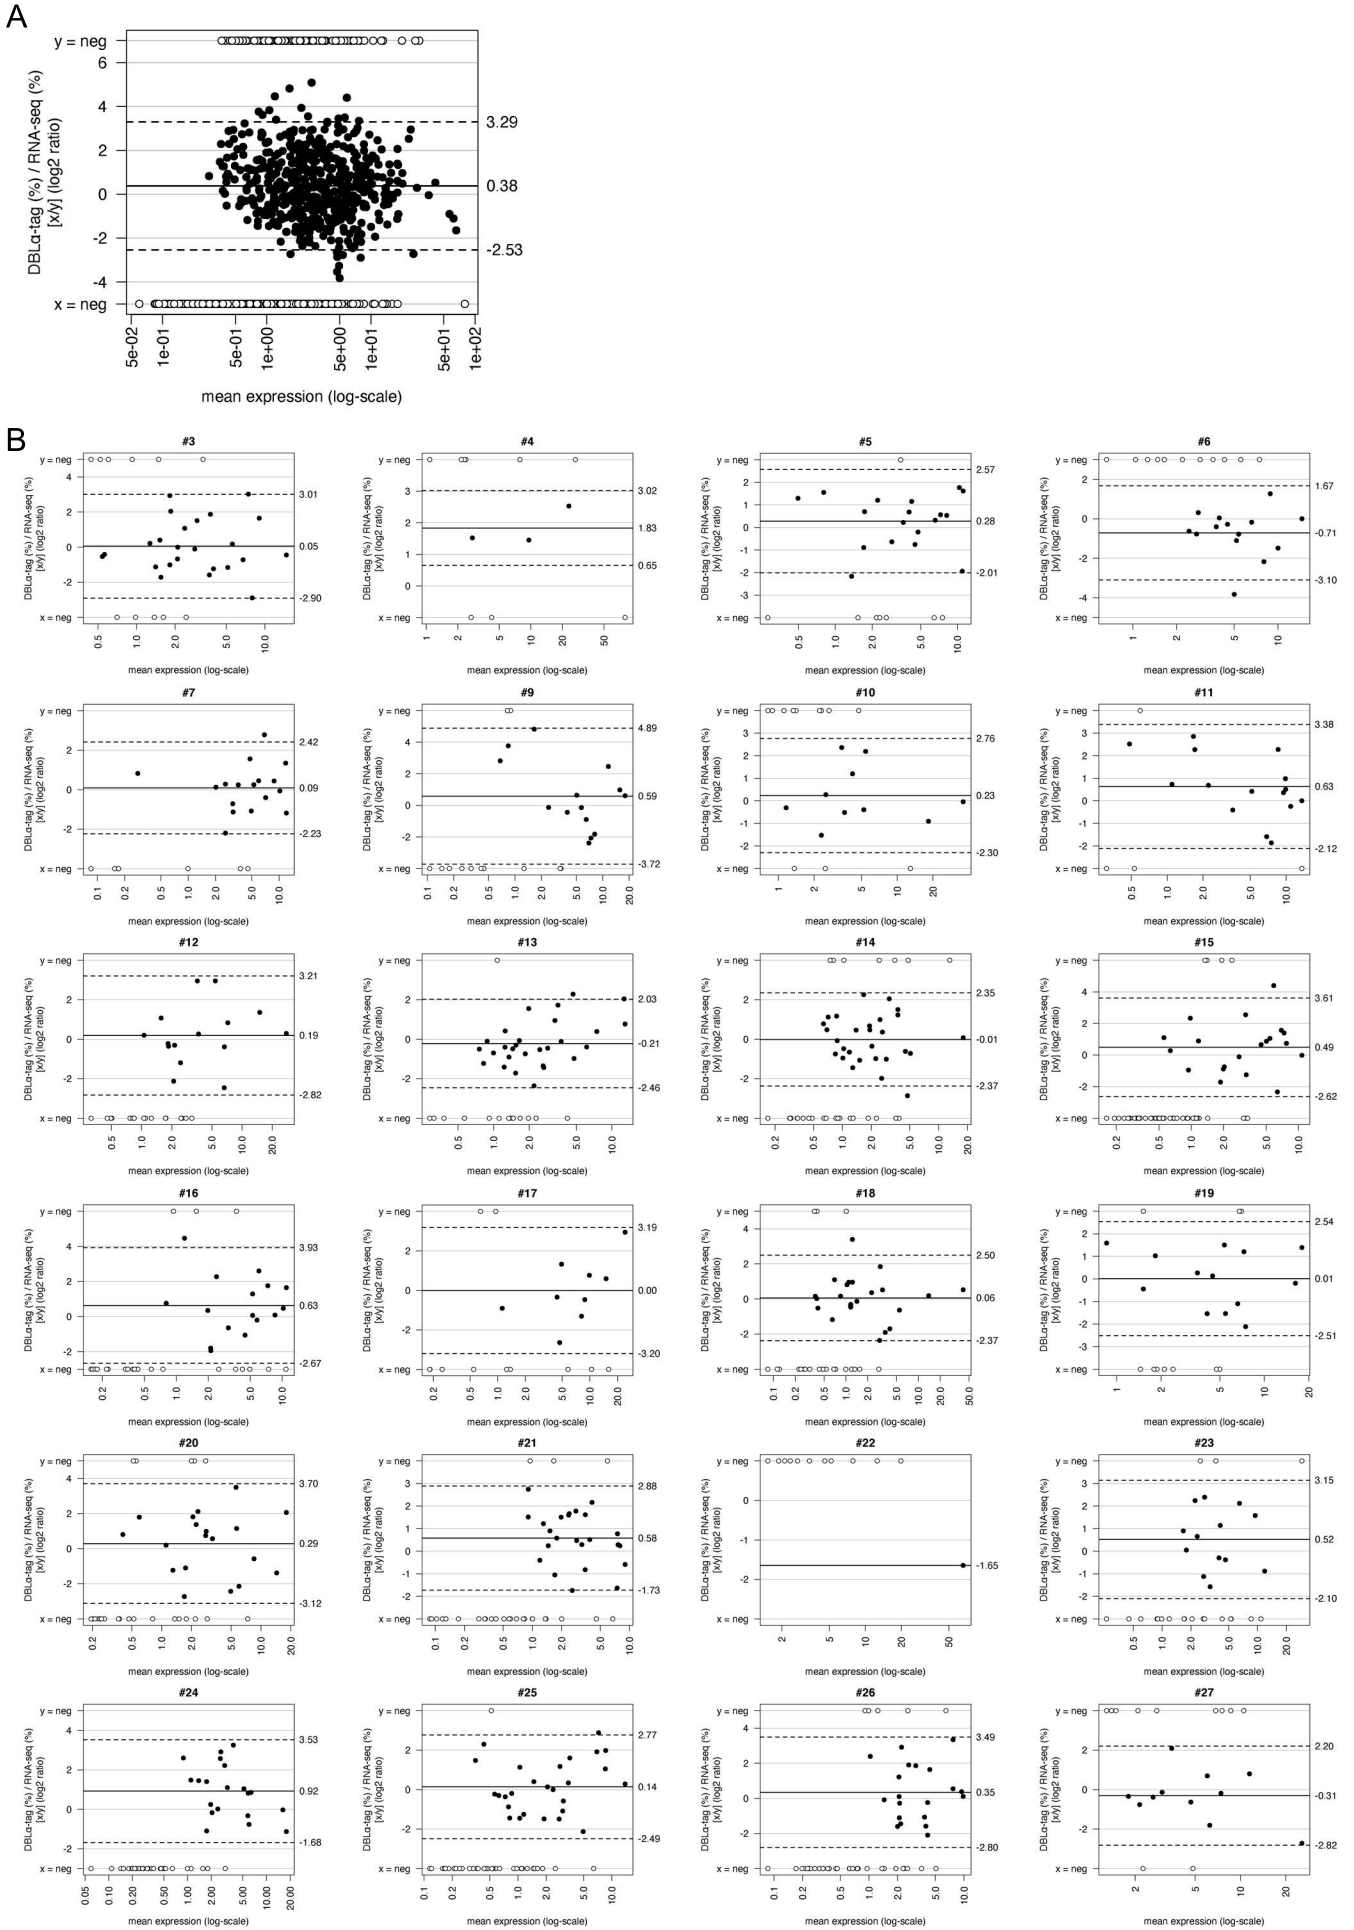

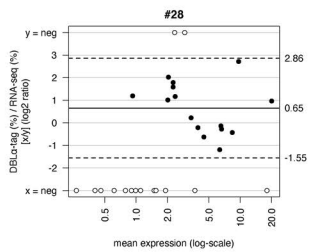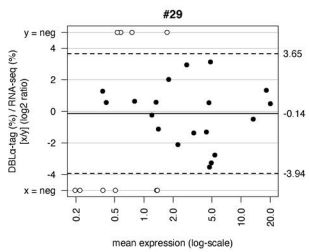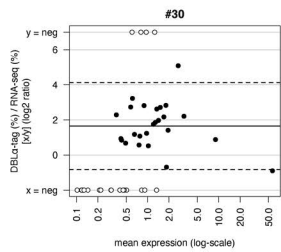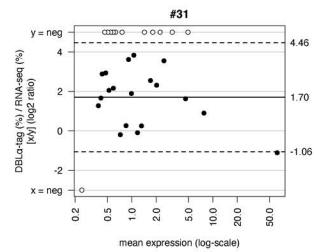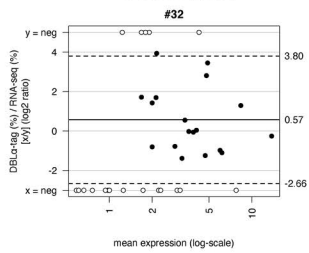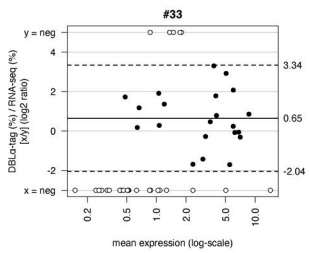

Supplement: Supplementary file [file media-3.pdf]
