# Supplementary material for: Gene expression profiling of malaria parasites reveals common virulence gene expression in adult first-time infected patients and severe cases
Source: bioRxiv or medRxiv preprint supplement (doi:10.1101/2020.11.13.381137), 2021-03-23

A

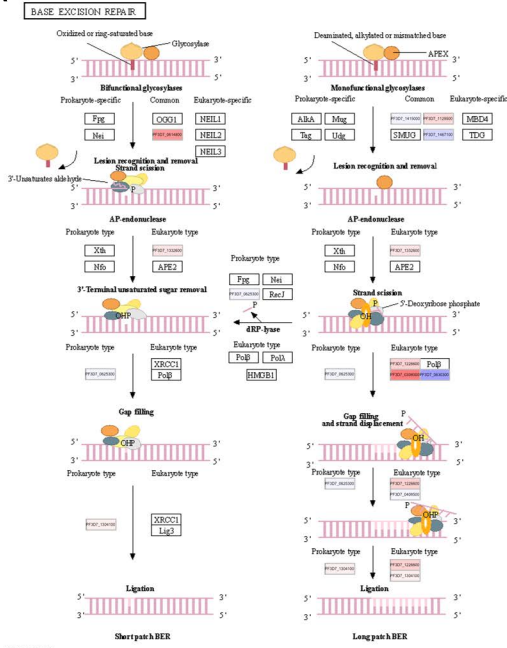

0340 T0117  
 © 2010 Kluwer Academic Publishers

B

| GeneID        | logFC  | adj.P.Val      | KEGG abbreviation | Product Description                                  |
|---------------|--------|----------------|-------------------|------------------------------------------------------|
| PF3D7_1361900 | 1,144  | <b>0,00723</b> | PCNA              | proliferating cell nuclear antigen 1                 |
| PF3D7_0618000 | 1,338  | <b>0,00634</b> | NTH               | endonuclease III homologue, putative                 |
| PF3D7_0308000 | 1,617  | <b>0,00384</b> | Pold              | DNA polymerase delta small subunit, putative         |
| PF3D7_1415000 | 0,11   | 0,846          | UNG               | uracil-DNA glycosylase                               |
| PF3D7_1129500 | 0,641  | <b>0,0121</b>  | MUTY              | A/G-specific adenine glycosylase, putative           |
| PF3D7_1467100 | -0,201 | 0,359          | MPG               | DNA-3-methyladenine glycosylase, putative            |
| PF3D7_1332600 | 0,538  | <b>0,0336</b>  | APE1/APEX         | apurinic/apyrimidinic endonuclease Ape1, putative    |
| PF3D7_0625300 | 0,128  | 0,731          | Dppl              | DNA polymerase I, putative                           |
| PF3D7_1411400 | 0,243  | 0,503          | Dppl              | plastid replication-repair enzyme                    |
| PF3D7_1226600 | 0,724  | 0,0708         | PCNA              | proliferating cell nuclear antigen 2                 |
| PF3D7_1017000 | 0,961  | <b>0,0285</b>  | Pold              | DNA polymerase delta catalytic subunit               |
| PF3D7_0630300 | -0,761 | 0,185          | Pole              | DNA polymerase epsilon catalytic subunit A, putative |
| PF3D7_1234300 | 0,29   | 0,298          | Pole              | DNA polymerase epsilon subunit B, putative           |
| PF3D7_1304100 | 0,411  | 0,526          | Lig1              | DNA ligase I                                         |
| PF3D7_0408500 | 0,152  | 0,723          | Fen1              | flap endonuclease 1                                  |

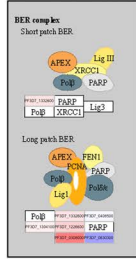

Supplement: Supplementary file [file media-4.pdf]
