# Supplementary material for: Gene expression profiling of malaria parasites reveals common virulence gene expression in adult first-time infected patients and severe cases
Source: bioRxiv preprint, doi:10.1101/2020.11.13.381137, version 3 (2021-03-23)
Supplement: Table S1 [file 381137_file18.xlsx]

## Sheet: Luminex_MFI
			B	B	B	B	B	B	B	B	B	B	B	B	A	A	A	A	A	A	A	A	A	A	A	A	A	A	A	A	A	A	A	A	A	A	A
			CD36	CD36	CD36	CD36	CD36	CD36	CD36	CD36	CD36	CD36	CD36	CD36	EPCR	EPCR	EPCR	EPCR	EPCR	EPCR	EPCR	EPCR	unknown	unknown	EPCR	EPCR	EPCR	EPCR	EPCR	EPCR	EPCR	EPCR	EPCR	unknown	unknown	unknown	unknown
			CIDRa6	CIDRa5	CIDRa2.2	CIDRa3.3	CIDRa2.10	CIDRa2.4	CIDRa2.9	CIDRa2.7	CIDRa3.1	CIDRa3.1	CIDRa3.1	CIDRa3.5	CIDRa1.4	CIDRa1.1	CIDRa1.4	CIDRa1.1	CIDRa1.1	CIDRa1.5a	CIDRa1.5a	CIDRa1.5a	CIDRa1.5b	CIDRa1.5b	CIDRa1.6a	CIDRa1.6b	CIDRa1.6b	CIDRa1.7	CIDRa1.7	CIDRa1.7	CIDRa1.8a	CIDRa1.8b	CIDRa1.8b	CIDRd1	CIDRd1	CIDRd1	CIDRg3
			IT4var12	IT4var14	IT4var24	IT4var26	IT4var30	IT4var33	IT4var45	IT4var61	DD2var01	HB3var27	IT4var21	IT4var15	HB3var03	IT4var20	IT4var7	igh_var19	raj116_var8	1965_2	ERS010323_NODE_8783_length_1174_cov_18.774277_rframe1_ORF	>ERS010022_NODE_90_length_8011_cov_50.444016_rframe2_ORF	1918_5	198313	HB3var02	>ERS010570_NODE_1927_length_9352_cov_43.677395_rframe3_ORF	>ERS010031_NODE_1881_4_length_3948_cov_7.379179_rframe3_ORF	1965_8	1918_3	>ERS010438_NODE_14828_length_2727_cov_12.337000_rframe1_ORF	>ERS010178_NODE_17177_length_7471_cov_8.698702_rframe2_ORF	2053_3	>ERS010532_NODE_326_length_3274_cov_78.463348_rframe2_OR	HB3var05	HB3var35	IT4var02	IT4var08
Sample#	Exposure	Severity	ga037 (12)	ga038 (13)	ga039 (14)	ga040 (15)	ga041 (18)	ga042 (19)	ga043 (20)	ga044 (21)	252/253 (22)	258/259 (25)	189/190 (26)	276/277 (27)	422/423 (28)	274/275 (29)	ga006 (30)	ga007 (33)	ga010 (34)	ga012 (35)	ga013 (36)	ga014 (37)	ga015 (38)	ga016 (39)	262/263 (42)	ga018 (43)	ga019 (44)	ga021 (45)	ga022 (46)	ga024 (47)	ga026 (48)	ga027 (51)	ga029 (52)	264/265 (54)	266/267 (55)	199/200 (56)	272/273 (57)	ama1 (61)	tet tox (62)	msp1 (63)	csp (64)	var2 (53)	bsa (80)
#01	naive	severe	839.5	642.5	2457	614.5	604.8	1056	1616.5	505.5	935.8	1788.5	821	561.5	2337	2148	1475	2986	1699.5	708.8	1428.5	1955.3	788.5	1226.5	900.5	2039	1114.5	555	543	1454	1405.3	494	1803	870.3	1056	550	375	743.5	23423	305.5	7140	1097.5	95
#02	pre-exposed	non-severe	1765.5	1904	2380.5	380	1965.3	2883	2462.5	1789.5	1365.8	3063	1817	892	1747.5	1543	4928.5	5866.5	3553	1852.3	1646.5	1771.3	729	798	2749.5	4011	2947	2194	1111.5	1625.5	2974.3	2144.5	1975	1807.8	1164	1215	2880	12856	15707.5	23314	8689.5	778	155
#03	naive	non-severe	274	314.5	1775.5	270.5	444.8	301	594.5	554	720.8	2158.5	834.5	398.5	923	535.5	739	692	434	348.3	638.5	639.8	410	437.5	465.5	526	751	993	278.5	994.5	354.3	458.5	640	875.3	610	560	770	9646	10448	3392.5	23529	468	32
#04	pre-exposed	non-severe	5098.5	4112.5	5910	6166.5	4808.8	6106	6157.5	4474.5	3862.3	5690	4360	4529.5	8900.5	9118.5	9414	12282.5	9555	4744.3	4381	7168.3	4029	5733.5	7015.5	7663	6469	6271	3997.5	12522	7303.3	5061.5	5973.5	4126.3	9461	5929	9851	23661	22654.5	22687.5	1682.5	1848.5	2800
#05	pre-exposed	non-severe	5955.5	3363	2883	5842	3056.8	3652	2451.5	2227	5454.8	9316	6607	3269.5	3038	3862.5	3146	2990.5	2130	2939.8	3839.5	2537.8	2818	2614.5	2484.5	2870	5055	4781	1925.5	4271.5	5386.3	3250.5	4158	5174.8	4517	4252	4455	23166	17262	21617.5	3412	2131	1590.5
#06	naive	non-severe	701.5	1274.5	4661	596.5	993.3	2226.5	3385.5	1632	899.8	2749	1169	1372.5	5049	5028	3516	11296	5527	2390.8	1572.5	3861.8	1167	3229.5	1475.5	4957.5	2635	895	1255	4291.5	3225.3	992	2753.5	758.8	1761.5	1084	650	1227	7602	237	148	1810	53
#07	pre-exposed	non-severe	1439.5	1095	1412.5	1257.5	1140.8	1318.5	1234.5	1077	3527.3	5050	3708.5	3777.5	2749.5	3093	7114	1413.5	813.5	1069.3	1432.5	2075.3	4430	818	1976.5	545.5	2417	3603	615.5	2759.5	2022.3	1115	1611	2446.3	2080	1223	1626	19681.5	12846	22991.5	3020.5	1020	304
#09	naive	non-severe	191.5	1158.5	2143.5	138	258.8	7539.5	2092.5	11451	337.8	1061	356.5	875.5	2397	2201	9156	4819.5	1835	513.3	1568.5	2072.3	443	1018.5	677.5	2116.5	1164.5	1503.5	570.5	19405.5	1479.8	428.5	1531	2303.3	1539	611	265	3496.5	216.5	104.5	316.5	2229.5	30
#10	pre-exposed	non-severe	1847.5	2747.5	13917	1383.5	2478.8	7516	13016.5	3873	4863.8	8377	6012.5	3983.5	15074	15458	15077	15024	10495	10535.8	7491.5	13065.3	6259.5	12290.5	5987.5	13800.5	10321	10707	7843.5	11979.5	10549.3	16865.5	8833	3312.3	11596.5	6161.5	5504	23181.5	20567	13584	2119.5	9135.5	187
#11	pre-exposed	non-severe	3756.5	4623.5	2260.5	3217.5	6666.8	4227	4443.5	6158.5	2424.8	1116	2105	2818.5	4881	6384.5	8874	9144	9301	2690.8	4152.5	3874.3	3080	988.5	3299	7629	5377	5774	3977.5	10840	6966.3	2997	5637.5	2939.3	10339.5	5293	12640.5	19067.5	3441	16566.5	2450.5	1122.5	55
#12	pre-exposed	non-severe	951	1423.5	3317	6839	2019.8	1825	2985.5	6374.5	7392.3	5756.5	3543	1546	3344	2376.5	2140	2964.5	2035	1070.3	2436	2725.3	903	2074	1681.5	2831	2870	2615.5	1904.5	1206.5	1215.8	2523.5	3009	2343.3	3343	1346	1532	21642.5	18167	23271.5	22931.5	1673.5	206
#13	naive	severe	174.5	217	828.5	102.5	196.3	306	620	356	395.8	1514	448	185.5	685	797	548	999.5	547	229.8	395.5	500.3	173	319	349.5	661	535	239	260.5	277	580.3	230.5	519	536.3	406.5	395.5	127	504	4163	64.5	208	386	16
#14	naive	non-severe	4279.5	1104	2720	947.5	1807.8	1976	2221	1589	4708.8	8240	5061	1978	3938	2628.5	2702	6846.5	2312	938.8	1982.5	2494.3	915.5	1779	1345	2649	2200	3853.5	1434	2084.5	2587.3	1377.5	2281	3431.8	2028.5	1739	1334	1236	11313	1660.5	400	1650	139
#15	naive	severe	921.5	825.5	356	127.5	1398.8	901.5	704.5	474	1519.3	1735	1096	294	518	491.5	1119	1418.5	1793	499.8	721.5	231.8	3244	256.5	277.5	1262.5	835.5	905	395.5	1862.5	902.8	502	521	936.3	165	220.5	924.5	449	12946.5	950.5	61.5	225	24
#16	naive	non-severe	1005	858	2153	1265.5	2479.8	2373	2864	1139.5	3882.3	7107	6914	2061.5	4357	2817.5	2092.5	4910	3513	1039.8	1431.5	6133.3	990.5	3811.5	3137.5	8454	6992	7297	2575	23524	1474.3	1703	1758	2686.8	1580.5	1207.5	1308.5	4500.5	22988	453.5	103.5	1330.5	123
#17	pre-exposed	non-severe	631.5	706	2160	1364.5	487.8	608	951.5	387	444.8	818	455	570.5	1193	1066.5	1402	3115.5	1506	1640.8	687	826.8	784.5	1101.5	470.5	1525	1426	2087.5	562.5	1229.5	950.3	407.5	1711	520.3	580	424	1447	6372	9427	23672.5	249.5	646	130
#18	pre-exposed	non-severe	2249.5	1242	2069	1149.5	1621.8	1244.5	1432.5	1577	2130.8	3409.5	4660	893.5	1541.5	2529.5	1884	3776.5	2431	985.8	1127.5	1021.8	782.5	792.5	888.5	2070	1938	2424	977.5	2113.5	1416.8	1332.5	2132	1797.3	1297	947	2673	23216	20229.5	23968.5	1203.5	723.5	217
#19	pre-exposed	non-severe	1954.5	849.5	4419	672.5	1384.8	2119	1080	1201	2783.3	5727	3638.5	1542.5	2351	1887.5	1877	4203.5	1858.5	1018.8	1893.5	1488.8	754	1714.5	935.5	2061	1608	2176	619	1808.5	1509.3	1055.5	1936.5	2562.3	975	4711.5	3509	23288.5	8468	23318.5	2038.5	641.5	215
#20	naive	severe	630	737	2603	429	837.8	792.5	923.5	926.5	3741.3	7129	4184	1452.5	2233	1537.5	875	8852.5	1477	490.8	939	696.3	540	1347.5	502.5	1091	1073	3206	510.5	1854	958.3	1014.5	1303	2503.8	1104.5	1145.5	1243	3502.5	16038	2697.5	605.5	893.5	102
#21	naive	non-severe	5064.5	203.5	208.5	222.5	505.8	493	162.5	184.5	469.8	964.5	536	220.5	395.5	298.5	189	3570.5	520	133.8	141.5	182.3	2607	257	75.5	355	420.5	242	96.5	3014	251.3	466.5	192	297.8	217	594.5	117	432	2894	106	313.5	255	25
#22	naive	non-severe	4741.5	2302.5	929	3223.5	2628.3	3462	911.5	1174	1070.8	2746	853.5	2544.5	1070	1675	1328.5	1992.5	1124	788.3	1522.5	890.3	1099	612	751.5	1267	3190	1405	952.5	1450.5	5084.3	685.5	921.5	1458.3	1677	727.5	788	3882	15686	1519.5	687.5	497	1921
#23	naive	severe	259.5	91	1733	69.5	118.3	258	745.5	3857	227.3	992	269	368.5	2273	1579.5	768	5823	1693.5	81.8	190.5	1550.3	226	890.5	92.5	1406	372	212	55	2085.5	898.3	147.5	530	222.8	138.5	118	113	377.5	8636	538	131.5	269.5	9.5
#24	pre-exposed	non-severe	700.5	290.5	750	406.5	1102.3	680	2478.5	1390	1142.8	1799	2920.5	598.5	9734	1217.5	678	2665	1244	504.8	399.5	1655.3	239	1306.5	882.5	1131	2931	1787	909.5	1558.5	518.3	620.5	1922.5	1130.3	826.5	13880.5	1069	22720.5	12532	23103	23206.5	587	133
#25	naive	severe	1184.5	935.5	3030.5	3779	759.8	1291	2159.5	1040.5	753.8	1873	1245	1501.5	3787.5	5842	2151	7924.5	3256	769.3	1170.5	2730.3	957	2073.5	1007	3552	1915	938	842.5	2352.5	2085.3	941.5	2071	798.3	1203	955	806	508	9133.5	329	161.5	861	205.5
#26	naive	severe	4690.5	4578	5925	2283.5	4144.8	4104.5	3152.5	3472.5	2012.8	3771	1531.5	2863.5	6034	4674.5	5590	14088.5	5501	2549.8	5145.5	3239.3	3420	990.5	2783.5	6510.5	5356	2317	2490.5	6787.5	3345.8	2083.5	3070	3559.8	2654	1989	3652	3157	6952	2532.5	923	859	1933
#27	pre-exposed	non-severe	766	5675.5	1273	1695.5	1109.8	386	619	1391.5	2347.3	4869	3686	827.5	2483.5	1949	1776	5139.5	921	390.8	481.5	3155.3	423	872.5	304.5	531	1247	2903.5	619.5	5173	706.8	1423.5	1770.5	1827.3	1643	878.5	1418	22478.5	8795	24539.5	6276.5	515.5	142
#28	pre-exposed	non-severe	1332.5	612.5	4046.5	318	2535.3	955	1773.5	908	1582.8	3392	2300	1996.5	2655.5	2180.5	1985	5991.5	2573	598.8	918.5	1784.3	1036.5	1045.5	948.5	2119	1258.5	1705	1032.5	3725.5	1750.3	864.5	1762.5	1588.3	2292	1947	1156	23508.5	747.5	23582.5	22904	530	225
#29	pre-exposed	non-severe	1513	776	805	519.5	513.8	449	651.5	596.5	1251.8	2745	1653.5	523	1586.5	484	815	522	438	554.8	1553.5	1919.8	945.5	554.5	432	562	2655	4262	583.5	11798.5	1563.3	507	1367.5	1125.3	942	595.5	741	23459	22823	24010.5	1951.5	459.5	114
#30	naive	severe	166	196.5	208	94.5	353.8	288	186.5	1533	169.8	308.5	141	111.5	122	171	749	1672	684	104.8	90.5	116.3	71	95.5	140.5	874.5	603.5	219	66.5	490.5	483.8	334.5	1000	139.3	234	57	552	1062	13625	11356.5	4187	216	12
#31	pre-exposed	non-severe	2276.5	4345.5	3576	1679.5	2325.8	1437.5	2759.5	2465	3336.8	5196	5521	2270.5	5698	4214.5	5953.5	7676.5	4374	3535.3	3033	5463.8	1725	2164.5	1383.5	2984	3797.5	5107	950.5	7370.5	2463.3	2152	2254	2174.3	3191	2753	5386	16030	14351	24137	1296.5	1432	150.5
#32	pre-exposed	non-severe	1009.5	454.5	9707.5	2131.5	679.8	2439	436.5	5320.5	1715.8	3180	3389	581.5	285	462.5	528	709.5	1146.5	364.8	1126.5	209.8	270	257.5	216.5	598.5	1156	1092	970.5	964.5	481.8	628.5	1195	1487.3	870.5	1065.5	1481	23705.5	15948	24638	1596.5	679	129
#33	pre-exposed	non-severe	818	828	568	585.5	1619.3	872.5	4603.5	1137	3988.8	7348	5973	1648	3683.5	1580.5	1411.5	1028.5	800	803.8	1569	936.3	825	1798.5	997.5	895	2195	7336	977.5	1858.5	991.8	1318	2472.5	3067.3	1578	2220	1597	18679.5	20123	22292.5	1817.5	1308	253
mean			1849.66	1577.73	2912.06	1555.39	1657.83	2065.2	2246.17	2257.39	2233.19	3780.91	2744.05	1533.06	3345.78	2869.78	3187.55	5075.16	2721.58	1465.28	1784.62	2467.93	1471.41	1727.17	1457.34	2860.88	2650.8	2862.67	1309.5	4835.41	2308.94	1753.95	2206.72	1900.28	2283.47	2087.38	2249.7	11919.9	12817.3	12735.7	4555.08	1196.2	366.438
X5	DK control	not applicable	443	471.5	549.5	298	612.8	568.5	782.5	579	2709.8	5889	3176	1013.5	1511.5	1057	608	2947.5	1073.5	355.3	659.5	682.8	371.5	822	271	804	1309	2114	356.5	1169.5	758.3	722.5	974	2217.3	834	772	872	624	12463	2301.5	978.5	811.5	81
X6	DK control	not applicable	244.5	150	160	254.5	257.8	217.5	244.5	9374	917.8	2509	1242	348.5	418	295	188	821.5	220.5	214.8	360.5	310.3	131	281.5	69.5	227	677	805	125.5	438.5	185.3	269.5	290	823.3	180	1215	315.5	315.5	7264	147.5	155	534	29
X7	DK control	not applicable	254.5	75.5	386.5	268	313.3	156	199.5	126	305.8	933	388.5	169	1505	709.5	267	7109.5	892	83.8	93	315.8	60.5	187	65.5	670	260.5	283	70.5	1421	295.3	218.5	170	341.3	96.5	117	155	58	378.5	45	19	229	9
X8	DK control	not applicable	200	160.5	1514	267.5	323.8	650	984.5	518	882.3	2297.5	1119.5	835.5	2632.5	1942.5	929	5740	2136.5	201.8	261.5	1394.8	310	1492	165.5	1807	795	734	163.5	2554.5	1121.3	282.5	801	644.8	295	266	436	353	19015	61.5	132.5	493	28.5
X13	DK control	not applicable	1008.5	240.5	1225	1007.5	345.8	3834	1059.5	12155	1403.8	3293	1728	625	2613	1798.5	761	8295.5	1628	754.3	418.5	1170.3	1422	884	186	1365	856	1147.5	184.5	2230.5	892.3	399	719	1153.3	371.5	416	480	424	20589	87	320.5	572	37
X14	DK control	not applicable	1195.5	982.5	493	1103.5	901.8	1279	494	619.5	1453.8	2520	1083	963.5	1138	951.5	999	1352.5	725	711.8	902.5	518.3	1088	601.5	504.5	827	1359	1053	662.5	776.5	1281.8	695	673	1196.3	783	598	650	943	18461	500.5	9838.5	727	539.5
X15	DK control	not applicable	483.5	147	222	106	245.8	215	179.5	172.5	842.3	1884	1102.5	336	279	217	218	339.5	180	156.8	227.5	161.3	187	233.5	125.5	192	330.5	662	174.5	195	217.3	227.5	538	683.8	196	259.5	269	193	23790	57	40.5	276.5	23
X16	DK control	not applicable	98	55.5	143	78.5	85.8	185	99.5	84	241.3	1039	442.5	956.5	291	219.5	108	1688.5	317	42.3	75.5	163.3	51	172.5	257.5	1037	215.5	448	42.5	834.5	121.3	79	94	319.3	71	100	95	180	8862.5	18.5	143	224.5	13.5
X20	DK control	not applicable	213.5	67.5	3746.5	135.5	139.8	206	122.5	66	261.8	796	305	340.5	346	462.5	121.5	1184	268	65.8	96.5	134.3	67.5	157.5	190.5	292	511	409.5	99.5	451.5	148.3	177.5	100.5	324.3	116	99	163	123	5778	35.5	163.5	613.5	18
X21	DK control	not applicable	1193.5	136.5	83	113	237.8	325	201.5	180	732.8	2448	756	252.5	429.5	552	325	630.5	130	119.3	222.5	121.3	105	220.5	86.5	143.5	548.5	586	122	229.5	147.3	287.5	215.5	731.3	181	224	256.5	314	770	61	102.5	528	22.5
X22	DK control	not applicable	897.5	195.5	2792	556	241.3	950	1257	615	1007.8	1975.5	1091	742	3395.5	2089.5	1449	7823.5	2687.5	279.8	449.5	1721.3	328	1216	239.5	2106	943	745	158.5	2751.5	1202.3	220	814	392.3	395.5	304	300	300	820	67.5	687.5	949	46
X23	DK control	not applicable	289.5	217.5	469.5	191	370.8	577	390	245	1264.8	4361	1373	408	1301.5	831.5	645	5073.5	1646	175.3	372.5	511.3	171	504.5	139	890	786	621	144	1026	416.8	317.5	380	1374.3	259	304	549	544	15059.5	87	50.5	447	41.5
X24	DK control	not applicable	141.5	31.5	548	49.5	86.8	58	68	90	159.8	453	224	57.5	68	2184.5	57	127.5	49	26.3	57.5	37.3	23.5	41.5	23	44	129	112	30.5	69.5	62.3	221.5	50	156.8	38	54.5	52	83	2569	53	11.5	109	14
X28	DK control	not applicable	185.5	26	89	65.5	42.3	60	56.5	259	35.3	271.5	52	91.5	237.5	139.5	54	1491.5	259	18.8	32	68.8	23	97.5	18.5	123	145.5	87	22.5	258.5	117.3	26.5	63	78.3	31	31.5	53	79.5	12745	14.5	440.5	102	12
X29	DK control	not applicable	109.5	51.5	194	37	96.8	184	152	110.5	198.8	1015.5	276	140.5	347.5	355	136.5	978.5	316.5	72.8	79.5	147.3	44	176.5	42.5	234.5	191.5	256	38	416.5	149.3	59.5	127	277.3	69.5	84	79	204	14286	22.5	18.5	109	16
X30	DK control	not applicable	213	64.5	175	104.5	122.3	185	80	63	117.8	602	158	66	86	232.5	101	103.5	57.5	62.8	92.5	68.3	37	40	63.5	96	241.5	88	50	79.5	100.3	282.5	115	219.3	74	71	51	165.5	3865	30.5	10.5	136	32
X31	DK control	not applicable	384.5	394.5	534	311	573.8	478	650.5	498	1980.3	5172	2578	936.5	1205	1011.5	579.5	3953.5	828	319.3	597.5	715.3	392	769	208.5	711	1019	1863	284.5	1073.5	556.3	623	814	1889.3	582	649	1097	758	10692	137.5	86.5	564.5	73
X32	DK control	not applicable	1573	996.5	1473	3718	705.3	1032.5	660	621	955.8	3247	1110.5	980.5	1534	1336.5	747	4525.5	1220	344.8	662.5	1114.3	493.5	776	226	1404	2612	906	395.5	1525.5	1180.3	521	651	1198.3	524.5	2841	514	920.5	8625	235.5	3206.5	418.5	434
X36	DK control	not applicable	6407.5	592.5	3695	716.5	1085.8	1781	2467.5	874.5	1693.8	5415	2378.5	1338.5	5321	4195	5428	11936.5	3749	562.8	950.5	3031.3	1299	2741.5	759.5	3760	1732	1380	444	4065.5	2458.8	841.5	2144	1699.3	1021	927	626	546.5	5561	219.5	203.5	1364	83.5
X37	DK control	not applicable	1336	656.5	349.5	626.5	663.8	853	408.5	444.5	1356.8	3489	1872	737	497	528.5	419	832.5	416.5	385.8	638.5	314.8	369	437.5	315.5	354	965	1101	290.5	882	1040.3	505.5	550	1371.3	502	600	676	810.5	21575	188.5	269.5	405	128
X38	DK control	not applicable	109	86.5	210.5	186	117.8	178	131.5	167	189.8	1095	293	144.5	785	379.5	165.5	5432	399.5	49.8	74.5	207.3	47	116.5	59.5	383.5	264	135.5	80.5	466.5	231.3	89	126.5	341.3	79	103	160	244	986	116.5	103	165	22
X39	DK control	not applicable	535.5	587	1712.5	590.5	371.3	817	1161	399.5	407.8	1327	724.5	370	1883	1317.5	1494	2558.5	987	535.8	1046.5	1130.3	629	924	555.5	1607	1202	421	546.5	1096	947.3	1303.5	923	436.3	953	631	193	620	23472	115.5	2428.5	1046	76.5
X40	DK control	not applicable	1204	724	679	701.5	522.8	1057	384.5	777	420.8	1516.5	314	645.5	1442	1130.5	775	5018.5	1086	302.3	547.5	915.3	589	467.5	266	1027	1186.5	223	254.5	1209.5	1349.8	286	397.5	573.3	458	221	201	501	10534.5	229.5	112.5	485	307
X44	DK control	not applicable	53	48.5	171	136	69.8	76	153.5	562	384.3	1103	705.5	244.5	640	378.5	150.5	2699.5	400	479.8	90.5	146.8	59.5	191.5	41.5	381.5	166.5	218	38.5	386.5	134.3	77	128	366.8	88.5	68.5	114	71	16906	24.5	378.5	129	8
X45	DK control	not applicable	704.5	318.5	678.5	300.5	445.8	618	517.5	358.5	1337.8	3812	1622	818	1627.5	1847	553	5929.5	1263	237.8	512	682.3	241.5	686.5	146.5	1098	783	1043	213.5	1810.5	746.3	430.5	676	1414.3	400	442	500	881.5	18741	211.5	427.5	457	89
X46	DK control	not applicable	478	363.5	3146	642.5	594.3	461	602.5	206.5	421.3	1351	459	392.5	506.5	374	332	2410.5	621	187.3	307	396.3	223.5	336	233.5	422	361	268.5	163.5	420.5	372.3	278.5	287	757.3	217.5	288	336	292	12425	162.5	462.5	548	25
X47	DK control	not applicable	185.5	966	3472	308.5	361.8	1468.5	2791.5	1670	230.8	1392.5	528	453.5	3403	3506.5	3021.5	7649.5	3092	1266.8	2207.5	2775.3	788.5	1492.5	2165.5	3916.5	1829.5	228	1876.5	1577	2316.3	683	2233	161.8	1874	1373	122	178	7906	543.5	231.5	1336	20
X48	DK control	not applicable	89.5	86.5	122	64	168.8	165.5	134	133.5	676.8	1420.5	981	240.5	444	225.5	241	2287.5	164.5	74.8	90.5	107.3	120.5	220.5	74	196	116	310	80.5	261.5	98.3	106.5	219.5	510.3	152.5	116.5	891.5	502	18841.5	47.5	2117.5	121	26
X52	DK control	not applicable	345.5	152.5	823.5	113	286.8	818.5	453.5	330	1229.8	2270	892	353.5	2002	1057.5	984	4098.5	994.5	183.8	197.5	744.3	265	578	153.5	991	667.5	487.5	96.5	1075	522.3	186.5	385	476.3	239	179	323	230	9686	47.5	1061.5	407	37
X53	DK control	not applicable	1208	545.5	1045.5	511.5	634.8	874	891.5	441	534.8	1796	721	453.5	890	1084	1027	1167	774	561.8	774.5	896.8	443.5	551.5	742	957	1158	422	592.5	534.5	956.3	489.5	743.5	675.3	852.5	641	310	559.5	9934	178.5	507.5	700	201
X54	DK control	not applicable	1202	846.5	1264	585	1029.8	977.5	1088.5	1374.5	3747.8	8341	4450	1867.5	1432.5	1284.5	753	2212.5	734	629.8	1505.5	748.3	690	1223	571.5	763	1526.5	3430	711.5	1221.5	928.3	1264	1419	3201.3	1472	1497	1477	1313.5	19544	228	210	1515	157
X55	DK control	not applicable	1262.5	536	431.5	1025	462.8	521	374.5	333	215.8	667	268	799.5	1029	814.5	409	4691.5	733.5	302.8	438	1047.8	368	406	229	799	931.5	455	332	1487	915.3	307	319	469.8	411	400	287	821	15510	262.5	179.5	605	247
X56	DK control	not applicable	1428.5	601.5	422	819.5	530.8	818.5	430	2753	832.8	1927	1113	688.5	841	833	512	2196.5	635	611.8	735	682.3	696	529.5	424.5	864	1427	1064.5	470	7047.5	1097.8	477	484.5	1204.3	475	447.5	441	774	9921	204.5	150	641	200.5
X60	DK control	not applicable	143	101.5	669	119.5	136.8	241	313.5	291	268.8	942	317.5	243.5	725.5	704.5	344	1883	601	91.3	118.5	561.8	135.5	279.5	76.5	627	365	223	67	689.5	386.3	122	260.5	336.8	131.5	139	241.5	482.5	17215	36	93.5	226	25
X61	DK control	not applicable	353.5	289.5	467	203.5	635.8	333	371.5	341	1689.8	3732	2291	1102	465	358.5	924.5	359.5	173	324.8	451.5	182.3	523	523.5	170.5	184	713	1403	293.5	604	318.3	504.5	542	1331.3	441	546.5	706	934.5	20444	101.5	191	639.5	52.5
X62	DK control	not applicable	79.5	49	47	61.5	122.8	294	85	99.5	332.8	1508	476	140	210	171	80	596.5	136	50.8	100	84.8	45	187.5	35.5	99	1065	251	40.5	216	83.8	115.5	110	493.3	77	107	102.5	356	3058	62	12.5	147.5	14
X63	DK control	not applicable	325.5	262.5	1003	188.5	239.8	1080.5	712.5	6508	1101.8	2372	907	767	1657	810.5	1116.5	1863	639	245.8	432	605.3	209.5	492.5	370	780.5	616	468.5	236.5	499.5	494.3	270.5	662	551.8	442	275.5	206	310	17873	573.5	99.5	595.5	29
X64	DK control	not applicable	316.5	197	391	415.5	253.3	204	313	168	655.8	2522	924	256.5	291.5	349.5	232	665.5	207.5	166.8	303.5	159.3	133	262.5	179	339	619	1324	332.5	509.5	247.3	293.5	251.5	986.3	256	376	369	1125.5	23064.5	130.5	144	785	599.5
mean			707.776	328.303	936.75	446.829	379.984	652.566	564.921	1173.88	873.734	2334.33	1064.28	561.026	1195.55	993.039	717.237	3175.63	853.684	296.274	452.158	652.011	346.855	561.066	275.039	855.842	805.882	730.961	270.684	1146.34	647.326	375.289	538.171	825.774	411.579	468	386.039	477.237	12348.2	201.224	678.658	530.566	100.447
STD			1058.85	294.993	1057.25	621.35	267.783	679.816	598.181	2562.81	771.421	1723.17	922.215	401.58	1106.2	891.555	964.456	2778.13	850.174	262.045	442.24	682.217	349.337	527.45	367.556	871.604	558.351	670.327	325.424	1290.79	583.365	296.899	503.85	653.386	405.061	536.37	314.229	323.252	7127.91	376.121	1677.24	356.924	145.479
cutoff for seropositivity (mean +2 STDs)			2825.47	918.288	3051.24	1689.53	915.551	2012.2	1761.28	6299.49	2416.58	5780.67	2908.71	1364.19	3407.95	2776.15	2646.15	8731.88	2554.03	820.364	1336.64	2016.45	1045.53	1615.97	1010.15	2599.05	1922.58	2071.61	921.532	3727.93	1814.06	969.087	1545.87	2132.55	1221.7	1540.74	1014.5	1123.74	not applicable	953.466	4033.14	1244.41	391.406

## Sheet: Luminex_seropositivity
			B	B	B	B	B	B	B	B	B	B	B	B	A	A	A	A	A	A	A	A	A	A	A	A	A	A	A	A	A	A	A	A	A	A	A
			CD36	CD36	CD36	CD36	CD36	CD36	CD36	CD36	CD36	CD36	CD36	CD36	EPCR	EPCR	EPCR	EPCR	EPCR	EPCR	EPCR	EPCR	unknown	unknown	EPCR	EPCR	EPCR	EPCR	EPCR	EPCR	EPCR	EPCR	EPCR	unknown	unknown	unknown	unknown
			CIDRa6	CIDRa5	CIDRa2.2	CIDRa3.3	CIDRa2.10	CIDRa2.4	CIDRa2.9	CIDRa2.7	CIDRa3.1	CIDRa3.1	CIDRa3.1	CIDRa3.5	CIDRa1.4	CIDRa1.1	CIDRa1.4	CIDRa1.1	CIDRa1.1	CIDRa1.5a	CIDRa1.5a	CIDRa1.5a	CIDRa1.5b	CIDRa1.5b	CIDRa1.6a	CIDRa1.6b	CIDRa1.6b	CIDRa1.7	CIDRa1.7	CIDRa1.7	CIDRa1.8a	CIDRa1.8b	CIDRa1.8b	CIDRd1	CIDRd1	CIDRd1	CIDRg3
			IT4var12	IT4var14	IT4var24	IT4var26	IT4var30	IT4var33	IT4var45	IT4var61	DD2var01	HB3var27	IT4var21	IT4var15	HB3var03	IT4var20	IT4var7	igh_var19	raj116_var8	1965_2	ERS010323_NODE_8783_length_1174_cov_18.774277_rframe1_ORF	>ERS010022_NODE_90_length_8011_cov_50.444016_rframe2_ORF	1918_5	198313	HB3var02	>ERS010570_NODE_1927_length_9352_cov_43.677395_rframe3_ORF	>ERS010031_NODE_1881_4_length_3948_cov_7.379179_rframe3_ORF	1965_8	1918_3	>ERS010438_NODE_14828_length_2727_cov_12.337000_rframe1_ORF	>ERS010178_NODE_17177_length_7471_cov_8.698702_rframe2_ORF	2053_3	>ERS010532_NODE_326_length_3274_cov_78.463348_rframe2_OR	HB3var05	HB3var35	IT4var02	IT4var08
Sample#	Exposure	Severity	ga037 (12)	ga038 (13)	ga039 (14)	ga040 (15)	ga041 (18)	ga042 (19)	ga043 (20)	ga044 (21)	252/253 (22)	258/259 (25)	189/190 (26)	276/277 (27)	422/423 (28)	274/275 (29)	ga006 (30)	ga007 (33)	ga010 (34)	ga012 (35)	ga013 (36)	ga014 (37)	ga015 (38)	ga016 (39)	262/263 (42)	ga018 (43)	ga019 (44)	ga021 (45)	ga022 (46)	ga024 (47)	ga026 (48)	ga027 (51)	ga029 (52)	264/265 (54)	266/267 (55)	199/200 (56)	272/273 (57)	ama-1 (61)	tet tox (62)	msp-1 (63)	csp-1 (64)	var2 (53)	bsa (80)
#01	naive	severe																			1												1								1
#02	pre-exposed	non-severe		1			1	1	1								1		1	1	1				1	1	1	1	1		1	1	1				1	1		1
#03	naive	non-severe																																				1		1	1
#04	pre-exposed	non-severe	1	1	1	1	1	1	1		1		1	1	1	1	1	1	1	1	1	1	1	1	1	1	1	1	1	1	1	1	1	1	1	1	1	1		1		1	1
#05	pre-exposed	non-severe	1	1	1	1	1	1	1		1	1	1	1		1	1			1	1	1	1	1	1	1	1	1	1	1	1	1	1	1	1	1	1	1		1		1	1
#06	naive	non-severe		1	1		1	1	1					1	1	1	1	1	1	1	1	1	1	1	1	1	1		1	1	1	1	1		1			1				1
#07	pre-exposed	non-severe		1			1				1		1	1		1	1			1	1	1	1		1		1	1			1	1	1	1	1		1	1		1
#09	naive	non-severe		1				1	1	1							1				1	1								1				1	1			1				1
#10	pre-exposed	non-severe		1	1		1	1	1		1	1	1	1	1	1	1	1	1	1	1	1	1	1	1	1	1	1	1	1	1	1	1	1	1	1	1	1		1		1
#11	pre-exposed	non-severe	1	1		1	1	1	1		1			1	1	1	1	1	1	1	1	1	1		1	1	1	1	1	1	1	1	1	1	1	1	1	1		1
#12	pre-exposed	non-severe		1	1	1	1		1	1	1		1	1						1	1	1		1	1	1	1	1	1			1	1	1	1		1	1		1	1	1
#13	naive	severe
#14	naive	non-severe	1	1			1		1		1	1	1	1	1		1			1	1	1		1	1	1	1	1	1		1	1	1	1	1	1	1	1		1		1
#15	naive	severe					1																1
#16	naive	non-severe					1	1	1		1	1	1	1	1	1			1	1	1	1		1	1	1	1	1	1	1		1	1	1	1		1	1				1
#17	pre-exposed	non-severe																		1								1					1				1	1		1
#18	pre-exposed	non-severe		1			1						1							1							1	1	1			1	1		1		1	1		1
#19	pre-exposed	non-severe			1		1	1			1		1	1						1	1			1				1				1	1	1		1	1	1		1
#20	naive	severe									1	1	1	1				1										1				1		1			1	1		1
#21	naive	non-severe	1																				1
#22	naive	non-severe	1	1		1	1	1						1							1		1				1		1		1				1			1		1			1
#23	naive	severe
#24	pre-exposed	non-severe					1		1				1		1												1						1			1	1	1		1	1
#25	naive	severe		1		1			1					1	1	1			1			1		1		1					1		1
#26	naive	severe	1	1	1	1	1	1	1					1	1	1	1	1	1	1	1	1	1		1	1	1	1	1	1	1	1	1	1	1	1	1	1		1			1
#27	pre-exposed	non-severe		1		1	1						1									1						1		1		1	1		1		1	1		1	1
#28	pre-exposed	non-severe			1		1		1					1					1										1				1		1	1	1	1		1	1
#29	pre-exposed	non-severe																			1						1	1		1								1		1
#30	naive	severe																																						1
#31	pre-exposed	non-severe		1	1		1		1		1		1	1	1	1	1		1	1	1	1	1	1	1	1	1	1	1	1	1	1	1	1	1	1	1	1		1		1
#32	pre-exposed	non-severe			1	1		1					1																1								1	1		1
#33	pre-exposed	non-severe					1		1		1	1	1	1	1						1			1			1	1	1			1	1	1	1	1	1	1		1		1

## Sheet: mADRB
Sample #	Exposure	Severity	mADRB
1	naive	severe	5.97837
2	pre-exposed	non-severe	7.24015
3	naive	non-severe	6.14199
4	pre-exposed	non-severe	6.569
5	pre-exposed	non-severe	6.77035
6	naive	non-severe	5.74945
7	pre-exposed	non-severe	7.21201
9	naive	non-severe	5.67318
10	pre-exposed	non-severe	6.71315
11	pre-exposed	non-severe	7.34035
12	pre-exposed	non-severe	7.49092
13	naive	severe	5.71314
14	naive	non-severe	5.76772
15	naive	severe	5.80331
16	naive	non-severe	6.02111
17	pre-exposed	non-severe	7.50137
18	pre-exposed	non-severe	7.4628
19	pre-exposed	non-severe	7.34786
20	naive	severe	6.53201
21	naive	non-severe	5.83711
22	naive	non-severe	5.183
23	naive	severe	5.48344
24	pre-exposed	non-severe	7.22735
25	naive	severe	5.68266
26	naive	severe	6.50848
27	pre-exposed	non-severe	7.19771
28	pre-exposed	non-severe	7.21275
29	pre-exposed	non-severe	7.2294
30	naive	severe	5.98213
31	pre-exposed	non-severe	6.72464
32	pre-exposed	non-severe	7.32992
33	pre-exposed	non-severe	7.30667
SIP	pool endemic area	not applicable	7.29916
NIP	naive control	not applicable	6.05388

## Sheet: ELISA
Sample #	Exposure	Severity	PEMS_ELISA_IgG	relPEMS_ELISA_IgG
1	naive	severe	2.977	0.278706
2	pre-exposed	non-severe	10.0085	0.936994
3	naive	non-severe	1.8495	0.17315
4	pre-exposed	non-severe	3.9375	0.368628
5	pre-exposed	non-severe	5.227	0.489351
6	naive	non-severe	5.9485	0.556897
7	pre-exposed	non-severe	7.001	0.655432
9	naive	non-severe	1.149	0.107569
10	pre-exposed	non-severe	7.8975	0.739362
11	pre-exposed	non-severe	8.2305	1.14067
12	pre-exposed	non-severe	10.657	1.47696
13	naive	severe	0.6315	0.0875199
14	naive	non-severe	2.6985	0.373987
15	naive	severe	1.7955	0.248839
16	naive	non-severe	0.767	0.106299
17	pre-exposed	non-severe	5.9205	0.820525
18	pre-exposed	non-severe	8.5945	1.19112
19	pre-exposed	non-severe	11.229	1.55623
20	naive	severe	1.7585	0.214347
21	naive	non-severe	1.974	0.240614
22	naive	non-severe	0.6785	0.0827036
23	naive	severe	2.728	0.332521
24	pre-exposed	non-severe	10.239	1.24805
25	naive	severe	5.1735	0.630607
26	naive	severe	6.5475	0.798086
27	pre-exposed	non-severe	7.89	0.961726
28	pre-exposed	non-severe	9.093	1.10836
29	pre-exposed	non-severe	8.5815	1.00228
30	naive	severe	5.3455	0.624328
31	pre-exposed	non-severe	4.4825	0.523534
32	pre-exposed	non-severe	5.924	0.691894
33	pre-exposed	non-severe	11.0045	1.28527
SIP	pool endemic area	not applicable	8.66575	1
NIP	naive control	not applicable	4.12888	0.476459

## Sheet: protein microarray_IgG
Sample #	Exposure	Severity	Ab.breadth_IgG_6fold	PF3D7_1014100	PF3D7_1368800	PF3D7_1001500	PF3D7_1203700	PF3D7_0207700	PF3D7_1300300	PF3D7_0830600	PF3D7_1149000	PF3D7_1476600	PF3D7_0632500	PF3D7_1321100	PF3D7_0108300	PF3D7_1123400	PF3D7_1236100	PF3D7_1036400	PF3D7_1216500	PF3D7_0627300	PF3D7_1434500	PF3D7_1023100	PF3D7_1028700	PF3D7_1452000	PF3D7_0930300	PF3D7_1448500	PF3D7_1015100	PF3D7_0220000	PF3D7_1471100	PF3D7_0710400	PF3D7_0911900	PF3D7_0830300	PF3D7_0501100	PF3D7_1417200	PF3D7_0207600	PF3D7_0704300	PF3D7_0917900	PF3D7_0831700	PF3D7_1462400	PF3D7_0424100	PF3D7_1208800	PF3D7_1239700	PF3D7_1133400	PF3D7_1121100	PF3D7_1122900	PF3D7_1410400	PF3D7_0801000	PF3D7_1334800	PF3D7_0731200
1	naive	severe	32	1.27535	0.857639	-0.00762235	1.00985	0.164463	3.47505	0.0834366	0.74747	0.728785	0.223493	0.453325	1.30088	1.10711	0.74747	-0.0286616	0.0785256	3.17896	0.545186	1.51412	0.590737	0.753646	1.55359	0.367347	0.562876	0.351149	-1.2767	0.164463	1.043	-1.2767	-0.0339696	0.831605	-0.161756	-1.03316	-0.0446445	-0.684817	3.13114	0.664692	3.64413	0.494466	0.241181	-1.01383	3.68791	1.2732	-1.10205	-0.263995	1.2903
2	pre-exposed	non-severe	99	3.4654	1.60682	3.78991	1.55569	2.61199	4.73853	1.07522	0.640111	1.71492	-0.598861	3.22457	2.22685	4.32522	2.58391	2.11095	1.45112	1.90344	3.17962	3.36777	3.10409	0.531918	4.96085	3.72668	3.66145	6.06577	2.63194	5.93056	2.68313	-0.896463	3.95819	2.22483	1.76524	0.948816	0.386331	4.59146	2.2904	-3.52559	4.90608	0.851676	1.43164	0.0565414	2.29887	5.43651	4.41428	1.83414	1.19061
3	naive	non-severe	43	1.99011	1.14005	1.75253	0.965142	2.21603	4.23153	0.350595	2.91595	0.871956	-0.0692019	0.698593	-0.222616	3.17194	0.346402	4.80922	0.931948	0.981457	1.21325	1.5173	0.685375	0.232877	2.66805	1.55048	1.68108	5.99374	0.223763	5.98382	1.45246	-1.3563	0.951404	0.478711	1.83415	0.531372	0.812404	0.467172	0.806311	0.474875	1.9114	0.6347	0.815441	-0.0748123	0.148699	1.74459	0.892232	0.954162	2.83297
4	pre-exposed	non-severe	33	2.82292	3.12213	2.77293	1.27768	4.75019	2.14157	-0.149515	1.16316	2.36287	0.525222	0.341613	-1.74568	3.22994	0.494717	2.89979	1.65218	1.09214	1.1295	1.07456	0.82061	0.103582	4.56879	1.3598	1.0863	4.50761	-0.224056	3.95308	1.48039	-0.488158	2.22361	0.472528	0.422487	0.763248	0.336714	1.4737	1.07751	0.992698	0.986445	2.82467	-1.18839	-1.34738	0.980165	4.68677	-1.27675	4.57609	0.271506
5	pre-exposed	non-severe	54	3.16717	0.150365	1.06834	3.17243	1.1997	5.87351	0.0791717	-0.156062	0.261991	-0.151387	1.83265	-1.50938	3.39497	0.502639	4.83398	0.716804	1.17513	1.4783	2.27554	2.08479	3.58414	3.74687	0.679666	0.276258	2.63972	1.29925	2.1159	1.49519	-0.718224	2.82302	-0.0428993	1.83265	0.43103	0.365749	0.627685	4.23002	0.944095	1.50129	1.64033	1.32696	0.210941	0.865954	6.07018	0.0256186	1.54029	2.5529
6	naive	non-severe	0	0.221365	1.13153	0.258059	-0.0956206	0.301062	0.208536	0.191034	-0.402835	-0.45469	-0.5856	0.266204	0.548781	0.146078	0.909947	0.746384	0.603493	0.927097	0.95211	0.68486	-0.357737	0.735667	-0.586133	1.45869	-0.197522	0.65097	-0.601553	-0.428277	0.364716	-1.06117	-0.505997	-0.740673	-0.497304	0.235934	-0.138353	-0.348225	1.69111	-0.0938848	0.0777456	0.179945	-0.329717	-0.707805	-0.4393	-0.762075	-0.682953	-0.650601	-0.991327
7	pre-exposed	non-severe	90	1.10227	3.24771	1.84558	0.245624	5.42034	3.71876	0.643693	0.641138	0.949132	0.787132	4.3986	4.4584	2.19387	2.75193	2.25631	0.735271	3.74196	2.6638	2.91908	1.53238	3.99768	3.24898	4.77637	0.738866	6.02855	2.52443	5.93294	1.88888	-0.162938	4.89692	1.76727	1.57058	2.1991	0.63473	1.96819	2.68448	-0.0947117	5.13848	0.387049	1.70239	-0.234853	0.0581635	4.62349	3.39508	0.759072	2.68851
9	naive	non-severe	1	0.716313	1.89588	0.367031	1.43869	0.350992	3.2228	1.74176	0.367031	-0.169928	-0.481553	-0.0048931	-0.724252	0.42776	-0.497597	-0.119399	-0.257377	0.126534	0.571569	-0.88379	0.00652816	0.0178597	0.205958	0.143186	2.17377	-0.249205	-0.124373	0.246981	1.30725	-2.08648	-1.85727	-0.724252	-0.71672	-1.46224	-1.59396	-0.948479	-1.58024	0.484403	-0.871193	-1.18262	-0.747087	-2.14407	0.241191	1.5262	-2.81758	-0.739435	-2.38199
10	pre-exposed	non-severe	47	5.47026	0.141072	3.02389	1.39684	2.77792	2.64078	0.219349	2.78628	1.30419	0.469845	0.998559	-0.84928	5.25502	1.08087	0.687654	0.661649	0.992152	2.0028	1.01129	2.00995	1.83662	2.95679	1.17863	0.241005	6.77056	-3.29248	6.59862	1.90643	0.230215	1.0899	-1.57363	5.50977	1.51664	-0.125789	0.894184	0.427775	0.71125	1.70177	0.444279	1.38467	0.322113	-0.115764	4.05905	4.67067	2.72819	0.820155
11	pre-exposed	non-severe	133	4.80583	1.81441	3.03341	1.94164	3.15754	5.34152	0.176662	3.32319	3.84815	0.926217	3.30517	3.80351	5.11977	0.952753	3.92141	3.50289	3.98276	2.82653	3.43156	3.52813	3.43888	4.36984	2.90195	3.25388	6.05631	4.00771	5.94341	2.93489	0.162481	3.7349	-0.243518	5.42818	3.47575	0.743268	0.989378	2.74174	1.97872	4.31606	1.68865	2.85254	1.92641	2.00331	5.37163	4.42679	4.73602	4.86724
12	pre-exposed	non-severe	85	4.35601	1.17556	3.46725	1.06648	5.50597	4.48356	0.48657	1.20858	2.98564	-0.131615	3.92261	0.182789	4.42265	0.408506	4.60754	0.629572	2.89775	2.15756	2.02186	3.28481	5.12643	2.94153	1.36464	1.96314	5.65371	3.65979	5.54689	2.50614	-0.0461483	2.71925	0.463494	2.6017	0.673502	1.32626	2.60079	1.57936	0.651686	1.47929	-0.0128248	2.86327	-0.796738	0.252543	5.63347	4.02913	0.756801	0.303498
13	naive	severe	16	1.24738	0.774183	2.02145	0.50239	3.45983	1.75641	0.385975	1.95056	0.265921	-0.849541	-0.267091	1.06029	2.18478	0.92273	0.326362	1.44885	0.0178071	2.11085	1.56406	1.6411	0.849848	1.36063	2.04432	2.97378	2.74156	0.111818	2.03293	2.52282	-1.41298	-0.424634	0.92273	1.34234	0.969783	-0.964457	-0.0452898	1.61078	1.36063	1.10378	0.874451	0.799714	-0.0137081	0.969783	3.08828	1.3787	-1.28797	-0.671265
14	naive	non-severe	22	2.23235	2.04824	1.06452	1.11579	1.96626	4.00509	1.5761	1.88414	1.12903	1.4441	2.59385	-0.380421	2.71533	1.636	1.49916	1.31109	2.18136	1.94502	2.75423	1.11579	1.88892	1.84044	1.98422	1.53611	1.36662	0.966033	1.06998	3.88394	0.886426	0.652161	2.18395	1.63978	1.5239	1.55824	1.31109	1.86649	1.1474	3.79303	1.32749	0.859184	-0.730242	1.40032	3.42613	0.564563	-0.443146	0.446348
15	naive	severe	25	1.8614	1.1125	-0.34396	0.786065	2.18838	1.7892	1.40159	1.24271	1.19504	1.47862	1.57601	-1.72297	2.60265	0.248952	1.3152	1.63112	0.502201	0.868544	3.60601	1.04574	1.16611	1.26393	1.9084	1.42606	-0.543366	0.134999	0.361993	0.42935	-1.22926	0.0800316	0.295028	1.01073	0.904381	0.463142	0.512626	6.19234	0.481361	4.58589	1.59865	0.84542	-0.361823	1.16611	2.90173	1.06066	0.796412	1.92036
16	naive	non-severe	6	0.941023	0.992556	0.555566	0.424168	1.28046	2.17022	-0.420114	2.81526	0.549068	-0.723627	0.243229	0.831709	2.45961	-0.280558	0.40423	-0.608588	1.06228	1.20026	1.82866	2.1247	-0.378281	1.69927	0.496794	0.591154	1.18482	-0.948261	0.00985223	4.52681	-0.323097	0.165486	0.689925	-0.846551	0.0876297	0.584703	-0.0340036	1.30963	1.05403	1.85254	0.855719	0.486939	-1.01959	-0.2904	0.677316	-0.552887	-0.900656	-1.04387
17	pre-exposed	non-severe	18	0.896526	1.07284	1.87122	0.265097	0.929025	1.29078	-0.0772299	0.373253	0.526659	-0.712029	-0.554406	-0.343345	1.22648	0.249287	-0.451156	1.10331	0.0654601	0.350144	-0.0564956	1.5701	-0.401582	3.93642	-0.620652	0.545893	4.26445	1.35269	4.15056	0.19687	-0.205197	-1.03994	-0.467238	-0.174408	-0.905771	-0.231366	1.20283	0.262849	-1.21477	0.623286	-1.15946	-0.46227	-0.539943	0.328094	4.51876	1.90909	1.92244	-1.14546
18	pre-exposed	non-severe	0	1.76616	0.564716	1.31089	0.37086	1.04504	2.08215	-1.0434	-0.511048	-1.11256	-1.50901	-1.10728	-0.152714	1.0358	0.220167	-0.129283	0.17565	0.418113	0.487299	0.65337	1.47322	0.556575	2.17156	0.467855	-0.404717	2.18279	-1.09239	1.97799	-0.870297	-1.72123	-0.97279	-1.45949	-0.936333	-0.596267	-1.22651	-0.334503	0.530272	0.409709	0.44191	0.462534	0.0680056	-1.56633	-0.430232	1.75735	-1.57089	-1.4748	-1.80856
19	pre-exposed	non-severe	75	2.79407	1.06654	4.92781	0.61915	5.22093	3.29643	-0.137082	4.16812	1.21005	-0.0483726	1.89771	0.936181	3.03495	0.38139	3.24277	1.08609	1.10538	2.88244	2.92407	3.0989	2.26853	6.45279	0.987899	2.25995	6.96197	-1.16282	6.87501	2.68434	0.782285	1.42657	1.05115	6.14461	1.04894	1.46192	0.349852	2.48688	0.955202	3.53875	1.01535	1.57692	0.990207	0.567712	6.21554	3.75365	-0.545109	1.59219
20	naive	severe	38	2.60437	2.62427	0.539557	1.68256	2.25723	4.05637	0.488442	2.53879	1.35121	1.26258	1.72002	1.29273	2.38868	1.06711	2.55961	0.713008	1.39819	1.23179	2.07839	2.22632	1.16815	1.81311	2.06681	1.98915	4.19719	2.03148	2.20005	1.7274	1.39819	0.920333	4.39082	3.41164	0.304157	1.47909	1.50507	1.03179	1.25239	1.4615	1.1463	1.01982	1.20032	1.06711	5.46714	0.264468	4.24809	1.09018
21	naive	non-severe	20	2.09502	0.642194	0.722918	0.720198	1.33844	3.34885	0.248321	0.437285	0.994378	-0.390324	0.792084	-0.37449	2.44387	0.0557611	1.10638	0.890477	1.7791	1.52576	1.74416	0.712012	0.593052	1.40706	1.16644	-0.166979	2.19295	0.0336391	0.220584	3.42719	0.0113854	0.0299392	0.914727	-0.221276	0.757871	0.150005	1.04153	2.1759	1.36876	1.36522	1.87291	-0.810432	-1.33593	-0.600934	3.74355	-0.892369	-0.240772	-2.00719
22	naive	non-severe	14	0.893546	-0.171374	-0.0556299	0.534426	2.05786	2.91194	0.0337841	0.0112264	1.58444	-0.296696	0.57585	0.91027	2.95625	1.21515	1.94553	1.17467	2.36819	2.46326	0.826559	1.51087	-0.397129	1.45822	0.435752	1.31888	0.968684	0.709272	0.617422	1.78614	1.04341	0.960353	1.93941	1.30308	1.14209	1.71174	1.03513	1.85793	1.25532	0.0037371	0.314267	-0.289871	-0.676958	2.24643	2.26659	0.542697	0.993648	-0.0111962
23	naive	severe	31	1.90509	-1.60256	0.987439	-0.201344	0.666573	2.17724	0.645457	-0.158569	0.639367	0.221056	1.27355	-2.02266	1.91647	1.33136	0.491688	0.538255	0.338474	0.9187	1.2853	1.00886	0.654544	1.54679	1.17174	0.822531	4.3041	-1.32253	3.18313	-0.673178	-1.0589	1.12891	1.43696	1.01593	0.589696	-1.45783	0.921212	1.45788	0.953479	4.48966	0.716602	-0.31948	-0.163852	0.495064	4.64231	-0.256513	0.62094	0.102149
24	pre-exposed	non-severe	127	5.07859	1.41407	0.441502	1.02362	1.9243	4.1902	0.281862	1.77274	0.924713	0.112151	4.03541	3.49919	4.65703	4.88554	5.24499	2.33847	2.04414	3.31827	3.52635	2.58087	3.93219	4.88742	3.86009	1.11191	6.08305	3.31153	5.97784	1.99855	-0.0282671	0.541752	4.51863	2.89701	4.20833	0.192281	-0.119535	3.01848	0.22599	3.91296	1.43219	1.0849	0.26856	2.97706	5.02517	2.02721	3.41688	0.732018
25	naive	severe	32	5.48961	2.52557	1.21286	1.73219	2.26546	3.35953	2.69115	2.67336	2.45843	1.90164	2.84212	2.16913	5.17663	1.91335	2.32102	2.83105	2.11743	2.44074	2.4994	2.13154	2.88675	2.34543	2.21337	1.04918	1.73219	1.29021	1.55517	2.52862	1.11921	1.77131	2.40966	0.808671	1.7028	1.23909	1.58183	2.4261	1.20907	5.70415	2.20196	-0.320073	1.2428	2.67611	5.20977	0.278009	0.813543	0.209821
26	naive	severe	61	3.20763	1.61685	0.457619	0.763266	0.948236	3.04736	1.25026	0.558426	1.17221	0.00241351	2.76455	3.38672	4.30945	3.04488	-0.247011	0.511863	1.77906	1.7699	2.48977	1.56526	1.32431	3.71703	3.12717	2.5098	2.41063	-0.146707	2.6611	2.92419	-0.38186	-1.6192	2.98481	1.12216	1.07204	0.322506	0.422987	2.2408	1.07318	4.27364	1.26387	-0.872899	-0.52199	0.80731	3.03917	-0.823974	0.65188	-0.77599
27	pre-exposed	non-severe	73	3.15357	1.7591	1.6545	0.652289	3.98555	2.99913	0.549688	2.65155	2.43537	0.82615	2.81133	1.24413	3.74963	1.60953	0.652289	-0.671116	2.48061	2.53573	2.76013	3.29851	3.32749	5.82734	3.69955	0.2114	6.34475	2.98394	6.06876	1.59269	-0.543737	0.461332	0.456261	4.93549	2.18712	0.895228	0.170701	3.1328	0.98482	3.79368	2.26458	1.04348	2.29709	2.3261	3.67484	0.15618	2.34954	-1.58496
28	pre-exposed	non-severe	60	1.78336	1.35515	0.64663	0.896593	1.75283	1.96567	0.96623	1.78243	0.825231	0.758692	3.95444	-0.00186925	2.00487	2.13298	2.26735	1.23112	1.72405	1.49343	2.48963	0.928893	2.27563	4.28156	2.22176	1.4313	5.42332	0.243597	5.49557	4.23303	-0.393134	0.673968	1.92915	0.912833	0.732927	1.49627	0.779351	2.37584	0.463791	3.86084	0.995419	1.50137	-0.241842	0.101678	1.62688	0.530674	0.370324	0.0345204
29	pre-exposed	non-severe	78	3.20127	3.74616	-0.125345	0.324829	0.156093	2.0794	1.02436	1.18962	0.275239	0.455246	2.8398	4.59698	3.43111	3.06856	1.21615	0.704145	2.85788	2.74796	3.50342	3.13355	3.48318	3.83284	4.16147	0.0242182	6.10993	-0.621312	5.89094	3.56439	-0.138721	0.399248	2.14345	2.91053	2.17894	0.174244	0.00811887	4.06445	-0.212216	0.638984	3.55594	1.50496	0.548648	-0.207513	2.60909	3.1513	1.75517	-0.63987
30	naive	severe	81	2.12845	3.42693	1.35359	0.537522	2.01193	2.45173	-0.020738	0.754654	0.565819	1.06331	2.11127	5.43322	3.62751	4.12641	1.76584	0.145975	3.63821	4.1044	3.23939	1.90746	2.10164	1.50448	4.22862	2.84599	3.90231	-0.162091	2.9387	3.12709	2.59591	-0.591115	2.50677	2.20421	0.881646	-0.278004	0.436938	4.66644	0.479207	4.92175	4.69522	0.548908	0.190271	0.479207	6.59656	0.315541	1.67783	-0.629009
31	pre-exposed	non-severe	86	3.18185	-0.172979	4.04078	4.2432	5.50557	3.08456	1.59876	3.45585	2.44749	2.66562	2.31773	2.34069	3.35496	2.44749	2.46431	3.50274	0.318688	2.51363	2.88972	2.29126	3.34061	3.32073	1.36196	-0.245298	6.2753	4.32069	6.01743	1.96859	-0.114434	2.08012	0.232201	3.20289	2.03015	1.55755	3.16136	0.53426	1.08948	2.27864	1.28198	1.96859	-1.19488	-0.620476	2.2818	0.518864	2.67408	0.178904
32	pre-exposed	non-severe	93	5.53083	1.92906	2.47022	1.62801	1.17258	2.25709	0.28001	4.11729	1.00655	-0.0903766	4.52675	3.16028	5.28984	2.94763	2.3275	0.72116	3.45498	1.97365	3.13792	5.34879	1.9093	3.93689	2.7866	4.87648	5.92858	1.97072	5.82115	2.63197	0.296486	0.696542	2.32921	0.675102	1.81443	0.331169	0.623799	4.29691	-0.204968	4.16004	0.251322	4.82062	2.84976	3.54465	3.04068	2.80727	0.13312	2.2583
33	pre-exposed	non-severe	93	4.64255	3.37318	1.93841	0.896199	4.63769	1.89797	1.57723	1.30585	1.68898	0.506464	2.82292	3.89404	4.71105	2.98261	2.88303	0.179428	3.79318	3.13339	3.0492	1.28688	3.85927	3.49903	3.30352	0.919053	5.78714	4.44866	5.65908	3.60056	-0.855908	1.50025	2.81684	2.87466	2.86344	1.40843	1.18398	3.96487	0.536333	2.22106	1.04725	3.94879	0.41994	-0.540113	3.15845	3.84689	0.0964309	0.363103
PosCo75_PosCo	positive	not applicable		4.97471	2.14712	3.33705	1.65731	7.31687	6.40685	-3.01152	3.20155	1.80643	0.910053	2.71536	2.64283	2.15965	2.10166	4.14397	1.35472	2.78442	2.83304	3.65681	3.07128	4.1235	5.16835	1.85689	2.40158	7.59119	1.75046	7.39888	2.62286	-0.79037	2.18439	2.50232	6.70578	1.45528	1.36678	2.30712	2.88427	-0.172466	3.13401	1.93348	2.92888	0.396895	0.0769281	5.31326	4.2977	4.02345	3.80021
PosCo76_PosCo	positive	not applicable		4.64369	1.63544	3.03693	1.91463	6.90731	4.75018	0.923208	3.09313	1.67831	-0.728867	2.65875	2.48228	2.42302	1.84861	4.00361	1.15696	2.80285	2.56775	3.28173	2.81596	3.78649	4.85852	1.95841	2.10261	7.28739	1.89004	7.04133	2.45493	-0.650393	1.96535	2.19524	6.34761	1.43807	0.934568	1.59485	2.72321	-0.284997	2.79274	1.57865	2.61881	0.379007	-0.459871	5.0458	3.9157	3.75038	3.53547
PosCo77_PosCo	positive	not applicable		4.28654	1.10052	2.97303	1.3179	6.85431	4.63285	-0.355539	2.73496	1.22942	-0.0203554	2.27314	2.50167	2.98476	1.99278	3.7941	1.22695	2.64631	2.51387	3.14434	2.60223	3.71397	4.5227	1.77859	1.88105	7.15319	1.18941	6.96985	2.24902	-0.918473	1.84287	2.27792	6.08434	0.828291	0.512862	1.55086	2.70778	-0.355539	2.79285	1.45287	2.58113	-0.377906	-0.111121	4.92986	3.77859	3.9844	3.69846
PosCo78_PosCo	positive	not applicable		5.0609	1.75954	3.52593	1.80872	7.06386	4.77548	0.00226342	3.37198	1.77498	0.935335	2.795	2.92987	2.61699	2.01063	4.07576	1.59916	2.8109	2.70202	3.47116	2.74969	3.8355	5.1369	2.26995	2.48447	7.40785	1.55014	7.26286	2.90435	-0.379947	2.63403	2.59008	6.57303	1.11595	1.00683	2.08685	2.69933	0.0424695	2.80506	1.7801	3.1306	0.689533	0.0815995	5.25202	4.15625	4.24886	3.80156
PosCo79_PosCo	positive	not applicable		4.51881	1.53784	2.95028	1.63928	6.60054	4.71359	0.816728	2.97118	1.63928	0.259861	2.35384	2.32246	1.60492	1.82644	3.81241	0.95117	2.39619	2.39928	3.19116	2.72759	3.65433	4.62485	2.04628	2.27112	6.83667	1.65616	6.6986	2.32246	-1.14884	2.07939	2.31839	5.934	1.22971	0.0360894	1.27075	2.47588	0.218497	2.53885	1.35588	2.56246	0.733528	0.345611	4.80113	3.60067	3.38706	3.46503
PosCo80_PosCo	positive	not applicable		4.1328	0.704487	2.80605	0.473836	6.5275	4.1919	0.676961	2.9779	1.18668	0.257796	1.95728	2.68315	1.49396	1.93738	3.58321	1.64107	2.28106	2.4264	2.72651	1.88147	3.13833	4.41277	1.80609	2.19899	6.74689	1.17956	6.57441	2.06255	-1.03635	1.47229	1.8989	6.00937	1.16883	0.709435	1.44139	2.30823	-1.31948	2.57749	1.05291	2.33649	-0.532553	-0.877983	4.70171	3.51595	3.67303	3.19544
PosCo83_PosCo	positive	not applicable		6.20821	2.85049	4.51844	2.59771	7.79022	5.82841	1.33462	4.63079	3.19254	2.02973	3.88007	3.20413	6.55774	2.50879	5.41838	2.50879	3.81768	4.01475	4.91913	4.22216	4.95946	6.61498	3.77454	2.99814	8.19583	2.46919	8.098	3.72569	1.00496	3.73152	3.79279	7.41554	2.12367	1.6063	2.9376	3.75463	1.02875	4.37859	2.59611	4.44844	1.15539	1.47684	6.3745	5.39903	5.37641	4.42748
PosCo86_PosCo	positive	not applicable		5.33985	2.04384	3.37874	1.83522	6.90125	4.35087	0.160554	3.71599	2.34388	1.19072	3.23728	2.32718	5.79461	2.28022	4.61446	1.86446	3.30336	3.28131	3.94706	3.64953	3.77145	5.92373	2.78871	1.84845	6.99754	1.85429	7.31489	2.9433	0.697417	3.10146	2.7726	6.59438	1.8659	1.40484	2.586	3.15509	0.220499	3.54687	1.53236	3.46287	0.52871	0.993116	5.02455	4.28807	4.44556	3.57544
PosCo97_PosCo	positive	not applicable		5.48	2.15603	3.86844	1.97472	6.98181	5.22153	1.24825	3.81338	2.00718	0.642029	3.05961	3.40521	5.80083	2.34079	4.66584	2.22028	3.14232	3.26097	4.15253	3.57558	4.42763	5.51179	3.18496	2.69056	7.42534	2.56451	7.25429	3.37299	-0.0415948	2.97692	2.5124	6.62123	1.19288	1.24825	3.09953	3.31931	0.226326	3.63111	2.55609	3.38587	0.58381	0.485039	5.89567	4.46811	4.7529	4.04329
PosCo98_PosCo	positive	not applicable		5.76058	2.19277	4.21833	1.85004	7.0306	5.47766	0.123071	3.87325	2.35707	0.491075	3.3962	3.24466	5.94902	2.66051	4.73985	2.45122	3.36165	3.37741	4.36904	3.72746	4.65603	5.97569	3.3007	2.92756	7.4208	2.60959	7.19195	3.36816	-0.188629	3.26425	2.64756	6.60792	1.71642	1.54967	3.15496	3.54528	0.819	3.78908	2.87952	3.5551	0.914351	1.42681	6.00427	4.47973	4.98595	4.04858
PosCo99_PosCo	positive	not applicable		5.11829	1.78769	3.25012	1.81114	6.32682	4.97344	0.256053	3.61148	2.0209	0.136435	3.08781	2.68789	5.57841	2.09001	4.20128	1.85945	3.14499	2.80545	3.70116	3.30531	3.74918	5.43926	2.91656	2.39835	6.7452	2.50767	6.53302	2.85687	-0.147732	2.67327	2.2112	5.98183	1.25443	1.08098	2.50767	3.10162	0.495362	3.2412	2.3926	3.0002	0.798789	0.548063	5.38508	4.09027	4.35415	3.72925
EUcontrol75_NegCo	negative	not applicable		1.60213	1.24904	0.149778	0.895578	3.9152	1.82884	0.640153	0.780799	-0.170292	-0.90947	0.795644	-0.610936	-2.51358	0.254711	0.735357	-0.380366	0.57326	-0.122392	1.67235	-0.158256	1.60636	2.09857	0.21336	2.94208	4.96917	0.476471	4.5272	0.59868	-0.0518149	-0.805737	0.264919	2.93874	-1.31404	0.0843525	0.285178	0.853578	0.922922	0.916134	0.411825	-0.0986919	-0.546338	1.06476	1.43636	1.25443	0.0843525	0.982633
EUcontrol76_NegCo	negative	not applicable		2.1487	1.88229	0.463478	0.945942	5.10597	1.43992	2.97973	0.795524	0.698594	-0.688673	1.10848	0.055976	-2.71519	0.178475	2.15754	-0.00540561	0.722583	2.54695	1.59488	0.337778	1.62251	2.31937	1.64244	1.06886	6.77005	-0.232751	6.63322	1.20668	0.0810602	0.742839	0.48351	1.64064	0.178475	-0.76236	-0.399737	0.89852	1.32128	2.68352	1.71611	0.397637	0.447269	1.08219	3.36114	1.90046	2.21433	1.00311
EUcontrol77_NegCo	negative	not applicable		1.30215	1.09335	-0.258995	0.308053	3.14352	1.46954	0.373856	0.256662	0.569109	-1.42267	3.00241	-0.258995	-2.37829	-0.915507	1.45441	-0.726569	0.825813	0.715908	1.96205	-0.607132	0.7901	1.7051	-0.851324	3.03837	4.28099	0.291124	3.60401	-0.0527512	-0.696192	-1.21594	0.166755	2.26492	0.166755	-0.75728	-1.42267	0.373856	1.1508	1.53573	-1.38806	0.129184	-0.283595	0.256662	1.67278	1.1508	-0.0314166	1.3438
EUcontrol78_NegCo	negative	not applicable		0.591003	-0.120273	-1.16912	-1.32512	1.72884	0.394004	-1.91828	-0.107877	-1.58504	-1.05947	-1.32512	-1.05947	-3.49884	0.0913772	-0.209155	-1.44853	-0.703893	-1.61497	1.00014	-1.7765	-0.841462	0.676586	-0.673742	2.57536	2.63296	-1.60003	2.18438	0.474259	-1.30959	-0.779975	0.366263	1.24401	-0.383771	-0.107877	0.113422	-1.12213	0.813448	0.403138	-0.496967	-0.64377	-0.764684	-0.658733	0.606943	-1.02817	0.188362	0.156661
EUcontrol79_NegCo	negative	not applicable		2.36079	1.21564	1.06405	1.1334	4.69291	2.00762	0.984963	1.04017	0.640808	-0.921628	1.09914	0.215815	-2.66463	-0.118875	1.87892	-0.962777	0.784049	1.11065	1.77787	0.215815	1.72643	2.98483	-0.526752	2.64032	5.92214	0.296339	5.67928	0.784049	-0.342979	-0.253989	0.769612	3.98193	-0.381758	-0.21654	-0.241459	1.15579	1.29345	1.44207	-0.921628	0.551097	-0.394763	0.656558	2.279	2.48095	0.966081	1.82405
EUcontrol80_NegCo	negative	not applicable		1.34784	0.255327	-0.0798359	0.42444	1.70306	0.576191	0.141151	0.170476	0.0498846	-0.927559	0.672682	-0.862206	-3.50126	0.399636	1.07709	-0.79739	-0.130928	0.508105	0.693278	-0.840535	-0.183373	-0.669837	0.641227	2.41114	3.17694	0.282609	2.62994	-0.0967168	0.703467	0.282609	0.0654459	1.44821	-2.14509	-0.733229	-0.219086	0.971431	0.792072	0.348747	0.126286	-0.712007	-0.165741	-0.712007	1.26082	-0.545782	-0.348737	-0.219086
EUcontrol83_NegCo	negative	not applicable		3.26496	-0.0416669	0.288896	1.83143	5.21082	2.70781	1.36775	1.85423	1.10951	0.582395	1.29554	-0.850104	3.07201	1.94916	1.25311	1.55543	2.34583	1.37786	3.01227	2.46203	2.18679	5.01715	1.90974	2.78521	6.03488	0.0481114	5.63391	1.63561	0.878928	-0.242414	1.92779	4.32725	0.767305	1.50917	1.62252	0.804824	0.627489	1.84667	0.400177	0.0416669	0.504589	1.4276	3.03746	2.13171	2.30215	2.10971
EUcontrol86_NegCo	negative	not applicable		3.25127	0.868382	1.38198	1.681	4.4165	2.55703	0.962999	1.66607	1.12696	0.462103	0.838753	-0.454668	2.37287	1.13855	0.173613	1.5485	2.60604	2.12392	2.85774	2.10818	2.6117	4.72203	1.84352	3.1244	5.38096	0.462103	4.73116	1.05703	0.655223	-0.481691	0.951196	3.55133	1.59	1.0979	1.85269	1.47973	1.08624	1.95939	0.892071	-0.17851	0.767619	1.10372	2.43475	0.862458	1.90236	1.12696
EUcontrol97_NegCo	negative	not applicable		2.11003	0.973284	0.654039	1.77936	3.3571	3.13592	0.294602	1.04777	0.55582	0.689277	1.27407	-0.678543	2.74346	0.605726	2.01576	0.914791	1.97816	1.34963	1.99708	0.822372	1.79025	2.78488	0.654039	1.56784	4.67172	-1.02501	4.14975	-0.36031	-0.153303	0.409711	0.884633	2.13587	-0.902801	-0.117041	0.543086	0.832936	1.05681	2.00177	0.395745	-0.379696	0.324113	1.14429	1.20251	0.617951	0.46441	0.894756
EUcontrol98_NegCo	negative	not applicable		2.03392	0.0899369	0.0562702	0.825104	2.6431	2.48878	0.14223	1.09767	0.673395	-0.203863	0.55297	-0.790736	2.18494	0.271134	0.591106	1.02291	1.92616	1.19374	1.49968	-0.203863	1.50967	2.65777	0.17398	1.88837	4.69464	-1.60597	4.12974	-1.35509	-0.321931	0.389469	-0.421249	2.40963	0.311666	-2.26773	-0.0643813	0.557792	0.984025	1.31263	0.586393	-0.96493	-0.270232	0.660002	1.37133	-0.43058	0.581666	0.734302
EUcontrol99_NegCo	negative	not applicable		2.5061	1.06982	0.756883	0.872752	4.23743	2.24795	0.497817	1.02215	0.644445	-0.340567	0.969271	0.345691	2.6452	0.980003	1.44515	0.580065	1.57824	1.18252	1.54971	0.487825	1.44773	3.39368	0.748538	1.82042	5.30962	-0.741307	5.03	0.163128	-0.340567	0.608009	0.482803	3.36804	0.594104	-1.12263	0.447151	1.11596	0.657875	1.54248	0.27773	0.334584	-0.150747	0.710378	1.66947	1.37098	1.18252	0.965675
[truncated: 216 more columns]

## Sheet: protein microarray_IgM
Sample #	Exposure	Severity	Ab.breadth_IgM_6fold	PF3D7_1014100	PF3D7_1368800	PF3D7_1001500	PF3D7_1203700	PF3D7_0207700	PF3D7_1300300	PF3D7_0830600	PF3D7_1149000	PF3D7_1476600	PF3D7_0632500	PF3D7_1321100	PF3D7_0108300	PF3D7_1123400	PF3D7_1236100	PF3D7_1036400	PF3D7_1216500	PF3D7_0627300	PF3D7_1434500	PF3D7_1023100	PF3D7_1028700	PF3D7_1452000	PF3D7_0930300	PF3D7_1448500	PF3D7_1015100	PF3D7_0220000	PF3D7_1471100	PF3D7_0710400	PF3D7_0911900	PF3D7_0830300	PF3D7_0501100	PF3D7_1417200	PF3D7_0207600	PF3D7_0704300	PF3D7_0917900	PF3D7_0831700	PF3D7_1462400	PF3D7_0424100	PF3D7_1208800	PF3D7_1239700	PF3D7_1133400	PF3D7_1121100	PF3D7_1122900	PF3D7_1410400	PF3D7_0801000	PF3D7_1334800	PF3D7_0731200
1	naive	severe	3	1.2381	1.31314	1.14855	1.26652	0.876281	1.44898	0.189537	-0.43267	-0.946896	-0.709711	-0.126982	0.86551	-0.0620394	0.54282	0.461551	-0.148127	0.0390745	-0.080333	0.882333	0.60451	2.57771	1.103	0.242954	-0.430051	0.30167	-1.32115	-0.867933	2.18612	-1.47351	-0.953164	-0.242453	0.954832	-1.0353	-0.303281	-0.0787376	1.09219	0.597775	2.66866	0.116324	0.236008	-0.831975	-0.527641	0.753213	-1.5032	-1.20542	-0.95585
2	pre-exposed	non-severe	23	1.36987	1.8587	2.11045	1.20875	1.18992	1.27207	-0.110176	0.414146	1.10822	-0.981827	1.42571	1.65047	1.8019	1.53301	1.34979	0.0577093	1.47678	1.91379	2.79492	0.71935	2.18199	1.60665	1.76887	1.3148	4.01401	-1.08235	3.89975	2.20037	-1.04876	0.937736	1.56117	3.21884	-0.004048	-0.783173	0.747845	2.39199	-0.446395	2.24437	0.895909	-0.388227	-0.815659	0.626564	3.97066	1.12165	-0.369463	-1.58985
3	naive	non-severe	36	1.8472	1.48263	3.26258	1.32926	3.16804	1.85971	0.524274	0.953323	0.152338	-0.470486	1.29859	-1.12301	2.22843	-0.392427	3.00807	0.739972	-0.106879	0.508482	1.49771	0.227807	0.980768	0.908146	1.39569	1.48717	2.63071	-0.574087	2.40808	3.62653	-1.41851	2.41074	-0.0709427	3.27182	0.546678	0.422608	0.124124	1.14171	0.341363	1.1087	1.73292	0.897574	-1.00894	0.271736	2.46723	0.620165	2.66094	-1.12794
4	pre-exposed	non-severe	0	1.94793	0.272844	1.89438	0.674933	1.69713	0.640376	-0.38883	1.71635	-0.0844054	-0.778018	-0.374249	-0.888791	1.31092	0.348449	1.34286	0.76141	0.76517	1.05164	1.37451	0.374085	1.07294	1.4848	1.66001	0.452244	-0.0225089	-0.58792	-0.709049	-0.145264	-0.758224	-0.277018	0.0190877	0.234672	0.44706	-0.399112	0.213179	0.850795	1.07221	0.400546	0.475975	-0.36632	-0.798668	-0.122895	-0.214062	-0.548273	0.0136076	-0.821165
5	pre-exposed	non-severe	9	1.26077	-0.284166	1.30578	0.853464	1.03645	2.26899	-0.301137	0.142337	0.0627108	-0.50476	0.465596	-1.92401	1.97149	0.685911	1.58678	0.307173	0.565541	1.23266	0.571964	1.06292	1.49597	1.49428	0.922948	1.31921	2.11915	0.469041	0.434212	-0.228737	-0.485957	-0.584824	0.378511	0.696238	-0.0602513	9.61434e-05	0.309096	1.19467	0.728221	0.508083	0.620798	-0.0676525	-0.220573	0.845533	0.805209	-0.0875606	0.967479	-0.533266
6	naive	non-severe	0	0.982868	0.736986	2.51037	0.193715	0.834562	0.440071	-0.197909	-0.176048	-0.383032	-0.56394	-0.42924	-0.468256	0.852701	0.497175	1.49368	0.594966	0.197317	0.632236	0.766053	0.159298	1.30182	0.528604	1.48785	0.208864	0.364788	-0.463051	-0.739945	0.266347	-0.71883	-0.425128	-0.334748	-0.17088	0.0405425	-0.479783	0.0516202	0.969467	0.651706	0.79674	0.246615	-0.0245006	-0.652088	0.104012	-0.305959	-0.507222	-0.146859	-0.648884
7	pre-exposed	non-severe	3	0.503311	1.06652	0.549181	0.036654	1.67243	1.01421	-0.241494	-0.317613	-0.669115	-0.739182	0.70364	0.624311	0.279116	-0.123505	1.71644	-0.182838	0.0988781	0.459323	0.666068	-0.0115998	1.45851	0.028458	0.650265	0.880269	2.70662	-1.11471	2.62637	1.84322	-1.08705	0.412667	-0.215593	2.11266	0.183159	-0.273269	-0.213951	1.62376	-0.102121	1.59107	-0.107358	-0.492255	-0.944562	-0.936027	-0.228738	-0.88541	-1.33145	0.113019
9	naive	non-severe	0	0.695272	0.240345	1.10677	0.165631	0.710996	0.360857	-0.630008	0.280521	-0.38578	-0.755507	-0.138074	-0.786849	0.0916471	-1.52174	0.245537	-0.572583	-0.512948	0.320428	-0.164226	0.288088	0.671682	0.721591	0.466897	-1.12951	-0.223963	-0.0108872	0.10979	-0.0806393	-2.33191	-1.99376	-1.39218	-0.668498	-1.78759	-1.5796	-1.19592	-1.4984	-0.50276	0.660065	-0.771097	-1.61701	-1.4984	0.165631	2.25456	-2.32601	-1.60092	-2.42316
10	pre-exposed	non-severe	17	1.92577	-0.723752	1.10156	1.31748	0.285865	1.80417	-0.882256	2.07804	0.744017	0.175819	-0.134212	-2.0951	1.87337	0.110271	1.65345	0.665674	0.121881	1.53439	1.80643	0.651692	1.4561	1.4584	1.02692	3.79596	3.91676	-0.57755	2.30333	3.87321	-0.0461944	0.217047	-0.732865	0.817429	1.05071	-1.24493	0.360194	0.390574	0.851033	0.666668	1.49857	-0.073897	0.167432	0.0309866	0.483713	-0.951955	1.81541	-0.451864
11	pre-exposed	non-severe	31	2.78955	1.21664	2.65433	0.367382	2.69202	4.56193	-0.0750103	1.37727	0.387835	0.0389753	-0.0132649	0.545957	2.58023	0.637641	1.7937	-0.245662	0.548371	0.121662	2.24337	2.30071	2.04898	0.429204	0.643063	0.169331	3.75386	0.249298	3.40295	1.33704	-0.219646	0.753951	0.607985	2.15107	0.127078	-0.0925738	-0.300468	0.951346	0.508664	1.58438	1.16194	-0.0796302	-0.664373	-0.2373	3.94881	1.10221	1.71549	-0.0132649
12	pre-exposed	non-severe	84	3.00164	2.46013	1.27604	2.46066	3.26157	4.09623	1.54127	3.13688	1.66577	0.181402	1.56557	3.06233	2.84473	2.08385	4.16552	1.45314	2.17177	2.01096	2.83722	1.85632	4.09614	2.16983	2.0124	1.96472	4.45249	-0.0232716	4.37548	4.34249	0.396532	2.61049	2.03318	3.29147	1.49039	0.147711	1.41329	2.6659	1.08207	2.98225	1.96135	2.34136	-0.533963	0.650781	4.43544	1.68898	1.62529	-0.928388
13	naive	severe	16	2.37174	2.04591	3.72394	0.970997	0.776902	1.02641	0.915504	1.62145	0.921451	0.0941837	1.87363	0.559568	2.92522	0.986842	2.06475	0.61005	1.18369	1.94254	1.84799	1.72374	0.980901	1.31516	2.29474	1.35139	0.197553	0.0349124	0.804573	0.806551	-0.0199505	0.0609383	1.85764	0.741385	2.05752	0.423527	0.790733	3.02451	1.393	1.29024	1.21679	0.604209	0.869914	1.83344	1.4118	0.749271	1.2652	0.0280053
14	naive	non-severe	0	0.838251	0.473651	1.08974	0.392169	1.62741	0.77476	0.383843	0.628806	0.0598645	0.0999245	0.444946	-0.494832	0.854161	-0.00684018	1.26878	0.170368	-0.00158468	0.715946	0.886012	0.314484	0.680989	0.596796	0.52552	0.41472	-0.00834013	-0.183095	-0.340151	-0.200699	-0.354747	-0.0765605	0.187003	1.02603	0.202118	0.160895	0.16405	0.825004	0.28102	0.0968262	0.522958	0.156168	-0.496079	0.198931	0.280207	-0.457091	-0.514712	-0.377792
15	naive	severe	2	1.52405	1.09907	0.773116	0.789561	1.26347	0.520284	0.0780653	-0.399695	-0.426871	-0.549056	-0.379197	-0.867157	0.634707	-0.251853	1.62731	0.105121	-0.0610205	0.238567	0.857009	0.00460246	0.829237	0.387224	0.656412	-0.404237	-0.96586	-0.79325	-0.927588	-0.667177	-1.37203	-0.417832	-0.725698	1.01471	-0.469526	-0.0148947	0.186576	1.23556	-0.169103	0.576485	0.169268	-0.109273	-0.79325	-0.38832	-0.188125	-0.586009	-0.426871	-1.02408
16	naive	non-severe	2	1.24	0.678635	1.99432	0.442566	1.81257	1.1337	0.339098	0.105714	0.499776	-0.174667	0.0571616	-0.673268	1.98349	-0.464675	1.9396	-0.348423	0.0989741	0.832437	1.32615	-0.0474217	0.538878	1.37358	0.384192	0.312264	0.676728	-0.176202	-0.0650382	0.608398	-0.230889	-0.0425989	0.14985	-0.214299	0.148142	0.484952	0.283831	1.28415	0.384192	0.768724	0.0754932	-0.00210384	-0.63944	-0.460571	0.494212	-0.593488	0.024098	-0.718758
17	pre-exposed	non-severe	1	0.650582	0.614086	1.82955	0.322635	1.29025	1.34723	-0.196406	0.565766	-0.0717714	-1.40563	-0.0283153	0.776371	1.06746	0.813634	0.509445	-0.628495	0.695308	0.434762	-0.251742	-0.405724	0.0380084	0.468125	-0.347885	0.161196	0.928744	-1.95287	0.664746	2.00242	-0.0835502	-0.302574	0.485881	0.883074	-1.21762	-2.377	-1.53398	-0.334359	-1.45382	0.423823	-0.137058	-1.71428	-2.18357	-1.83434	1.02837	-1.8049	-0.899668	-2.18237
18	pre-exposed	non-severe	1	1.54621	0.844974	2.1531	1.7352	2.12824	1.60755	-0.50814	1.28018	0.216907	-0.916887	0.0550704	0.372463	0.77846	0.109403	1.52945	0.0694257	0.365655	0.536346	1.11858	0.106903	2.10241	0.894125	1.34756	0.419683	1.01885	-0.855482	-0.574543	2.64151	-1.09616	0.131279	-0.83447	1.50043	-0.0457508	-0.961164	-0.369626	0.617749	0.648334	1.04206	1.12833	0.335897	-0.542333	-0.266223	1.55463	-0.85679	1.08524	-1.06256
19	pre-exposed	non-severe	16	2.25241	1.09665	0.824414	1.32622	1.0974	2.46211	0.505475	2.75282	0.508833	-0.989193	1.48583	0.131436	2.35424	-0.251371	0.966336	-0.119357	0.476039	0.925457	1.40313	2.14446	1.23387	1.3316	0.466284	1.91312	3.75856	-0.284899	3.60607	0.688376	-0.373837	0.0834435	1.59308	3.14521	-6.20401e-06	-0.152571	0.302438	0.867778	0.472603	1.7998	0.37293	0.351269	-0.102178	0.37906	1.67955	-0.305395	-0.0751106	0.214679
20	naive	severe	3	1.33313	1.62981	0.325707	0.127097	1.18386	0.405622	-0.151776	0.274924	0.022488	0.0139665	1.63308	0.803224	0.908462	1.05203	1.19608	-0.0811456	-0.264214	1.48252	1.35904	0.939107	1.59542	0.183044	0.784345	0.195094	1.0074	-0.748229	-0.551437	-0.528151	-0.929279	-0.997557	-0.049532	0.292301	-0.386715	0.355804	-0.0877178	0.922531	0.269102	2.06357	-0.29038	-0.353333	0.237803	0.0510853	1.09594	-1.0562	1.62283	-1.17506
21	naive	non-severe	0	1.18513	0.773572	1.43284	0.783055	1.21439	1.21966	-0.0554268	-0.380557	-0.288755	-0.624818	-0.290086	0.013241	0.192681	-0.562384	0.510644	-0.243996	0.183702	0.2272	1.66102	0.666272	1.85133	0.977364	0.0311423	0.220299	-0.590603	-0.583723	-0.773432	0.302301	-0.680142	-0.484895	-0.287423	-0.505356	-0.552933	-0.674037	-0.0574816	0.72448	0.530099	2.12955	-0.169879	-0.561125	-0.891695	-0.693538	-0.530163	-1.09297	-0.555456	-1.4198
22	naive	non-severe	0	1.27744	0.250923	0.576317	0.391938	0.82906	0.109603	-0.304281	-0.592336	0.341758	-0.704671	-0.159367	-1.09627	0.528605	-0.118842	2.05627	-0.175459	0.483933	0.760998	0.796557	0.332928	-0.373232	0.954972	-0.00880158	-0.36311	-0.727002	-0.107966	-0.293942	-0.249646	-0.299115	-0.055911	0.268428	0.166908	-0.0614206	0.433417	-0.299115	0.713453	0.15253	-0.455497	-0.403403	-0.340217	-0.987783	-0.64567	-0.0669232	-0.5853	0.884945	-1.02326
23	naive	severe	0	1.80086	-0.42187	1.69842	-0.050088	2.24894	0.94163	0.0478485	-0.418878	0.487824	-0.130138	0.253415	-1.52717	1.49534	-0.0985247	1.8287	0.00897872	0.309364	0.792529	0.296762	0.263684	1.53201	1.37808	0.886275	0.304331	0.0643759	-0.592935	-0.97302	-0.243727	-0.829056	0.680454	-0.541859	0.778941	0.46693	-0.802351	0.151117	0.847594	0.612817	0.311876	0.324396	-0.258438	-0.273178	-0.156152	0.782835	-0.255493	0.840115	-0.829056
24	pre-exposed	non-severe	90	2.35733	2.73036	0.716341	1.93239	0.59804	4.39304	2.28147	4.29243	0.755503	0.515528	2.38499	1.31946	3.23983	1.8718	3.15205	1.16885	2.01495	3.72019	3.32961	2.94202	3.06835	1.66225	1.70955	3.45468	5.26229	-0.148698	5.18908	1.80907	1.0808	1.41428	1.99691	2.30439	0.97785	0.62531	0.448069	2.00008	1.21016	2.63675	2.42636	1.62514	-0.0403912	3.08318	4.68967	1.19045	1.53047	1.26396
25	naive	severe	4	2.22444	1.31644	2.34031	1.04911	1.5815	0.90571	0.651446	0.872433	0.534712	0.352764	0.527819	-0.172502	1.8738	0.644856	2.09405	0.915384	0.660205	1.04732	1.41398	1.83218	1.75076	1.06511	1.23765	-0.162112	0.0318834	-0.0402748	-0.136144	0.121333	-0.992654	0.862533	0.271895	3.12727	0.29164	0.55529	0.80613	1.39555	0.664572	1.14788	0.899881	-0.372214	0.047284	0.41055	2.63107	-0.731701	-0.120571	-0.891607
26	naive	severe	3	0.855151	0.92451	2.00653	0.687839	1.05805	0.523788	-0.662355	-0.703742	0.0367997	-1.28663	2.22422	0.860851	1.24415	1.10837	2.85094	-0.0268331	0.731184	0.862628	0.759648	0.418098	0.789069	0.958152	0.759648	0.991356	0.499133	-0.829592	-0.649484	0.952153	-1.19669	-0.0541643	0.443999	1.28238	-0.49416	-0.118184	-0.336919	1.45872	0.841523	1.12979	0.846199	-0.437085	-0.537604	-0.635947	3.12548	-1.48602	0.248276	-1.55548
27	pre-exposed	non-severe	28	3.08335	0.85143	2.05053	1.82459	0.727661	4.19661	0.946021	1.51633	0.820918	0.638827	0.983237	-0.840961	2.98357	1.20366	1.53793	0.328718	0.458975	0.849271	0.227115	0.00213293	2.24447	0.944674	1.02654	0.866447	4.14439	0.729227	3.67878	1.17637	-1.02666	0.839882	0.312099	3.47388	0.210397	0.486082	0.0851712	1.22933	0.995649	1.09917	1.30582	2.97798	-0.139262	-0.147858	1.54239	0.51178	0.774664	-1.10539
28	pre-exposed	non-severe	21	1.21355	1.46045	1.65875	0.609951	1.45725	1.68839	0.619668	5.07657	0.818335	0.537595	2.25267	1.45564	1.59829	0.778417	5.44367	1.00728	0.919747	2.01437	2.80303	0.808447	1.96171	0.574826	1.42157	1.40837	4.74928	1.17514	3.86755	1.25098	-0.0386388	0.725814	1.07026	0.315279	0.967508	0.44138	0.439865	1.6952	0.332799	1.76415	1.00619	1.0343	-0.137237	0.278255	1.50064	0.453463	0.433793	0.0388483
29	pre-exposed	non-severe	9	1.11205	0.709701	0.743671	0.742412	-0.00148037	0.55473	-0.209663	0.68762	-0.0160563	-0.439759	1.0934	0.170144	1.6461	0.766158	1.46628	1.0901	0.219004	1.05907	1.36133	-0.451839	1.06109	1.00827	0.662091	0.222605	1.10324	-0.308247	0.691541	0.216597	-0.0584068	0.641067	0.0198062	1.3118	-1.39899	-0.52105	-1.52751	1.32981	0.591099	-0.783017	0.986091	-0.861838	-0.824204	-1.65425	0.048884	-1.19154	0.108745	-0.874438
30	naive	severe	0	1.55965	1.06054	1.25448	0.798712	0.667377	0.821455	-0.122038	0.0988374	-0.121006	-0.34866	0.916569	0.114708	1.2711	0.000710771	0.288792	-0.410373	0.29577	1.07818	1.34434	1.13851	1.71522	1.56448	1.10712	0.626756	-0.282517	-0.691349	-0.734525	0.385721	-0.732963	-0.1661	0.500904	0.296543	0.532099	-0.32826	0.16045	1.16458	0.86433	1.42329	0.813914	0.012995	0.165538	-0.0494996	0.621211	-1.67339	0.808503	-1.46739
31	pre-exposed	non-severe	1	1.73233	0.0890473	1.47784	1.00129	1.3183	0.677649	0.380952	0.0552222	0.467173	0.264931	0.46442	-0.690005	0.944015	-0.511867	1.94044	0.000414651	-0.141133	1.02536	1.07049	0.723028	0.715782	1.00388	0.317818	-0.350714	2.43695	-0.315593	1.98369	0.190553	-0.827737	-0.340131	-0.672462	-0.375016	-0.388714	0.524066	0.2005	-0.141989	0.114077	0.29591	0.569899	0.0543344	-0.792929	-0.622148	-0.389518	-0.797831	-0.467405	-0.981806
32	pre-exposed	non-severe	3	1.03165	0.102607	1.30104	-0.0335544	1.33398	0.923999	-0.975608	0.0801967	-0.213343	-1.25725	1.54923	-0.251459	1.30341	0.166248	1.16901	-0.57425	-0.164546	0.269752	0.26788	0.857823	1.00559	1.74365	0.361796	1.66913	2.68066	-1.33496	2.2193	1.38376	-1.03237	0.474866	-0.108972	1.41439	-0.246712	-0.549281	-0.995897	-0.207676	-0.360542	0.951557	0.311062	0.018866	-1.05071	-0.916777	0.538686	-1.21635	0.773498	-1.83875
33	pre-exposed	non-severe	52	2.29138	1.03302	2.26693	1.42602	3.27439	3.45827	1.85615	2.35571	1.0652	0.247025	1.61188	0.557302	3.27752	1.46326	3.06962	0.236094	0.89111	2.03378	1.2107	0.685267	1.50054	1.45636	1.13065	1.39257	3.63773	0.0617462	3.59645	3.45577	0.0101983	2.61887	1.02121	2.95041	1.22453	0.603438	0.178969	2.48323	0.240244	2.26822	1.42923	2.3629	-0.052932	-0.112101	3.37635	0.356676	2.35553	0.0776821
PosCo75_PosCo	positive	not applicable		1.92918	2.02307	2.55481	2.28769	2.58825	3.01137	0.127209	2.21417	0.0309275	0.399401	1.82762	1.46674	-2.00956	1.95608	1.8696	1.01807	1.98152	2.55193	2.90017	1.42471	3.11559	0.875345	1.40691	2.5065	5.36932	0.118751	4.8328	2.2703	-0.258008	0.00069366	2.41671	3.54074	0.790613	0.418667	0.923608	2.65156	0.445419	3.14506	0.251536	0.024036	0.290723	0.610454	3.07902	0.308223	0.532149	0.902511
PosCo76_PosCo	positive	not applicable		1.73445	2.35657	1.77232	1.91633	1.99486	2.63184	1.00331	2.28775	0.699049	-0.541056	2.53791	1.16361	-2.43025	1.41382	1.83347	0.0715741	1.54389	1.47995	2.28598	1.4666	2.12668	1.61254	1.76607	1.93102	5.29713	0.0453956	4.91238	2.42627	-0.113076	0.0790709	2.29828	3.41049	1.82022	0.437276	-0.152889	2.27269	-0.233293	2.74078	0.404626	-0.41165	0.293403	-0.107623	2.64153	-0.0233045	0.398865	0.477603
PosCo77_PosCo	positive	not applicable		1.26459	1.98016	2.04305	1.66551	2.07309	2.69889	0.0116421	1.92335	-0.0155682	-0.431709	2.2298	0.925727	-2.5274	1.57554	1.86329	0.302502	1.80644	1.81319	2.5312	1.67822	2.44565	0.912603	1.10173	1.95072	5.00063	-0.0427545	4.55007	2.35007	-0.660246	0.161367	2.26258	3.1663	1.6687	-0.176137	-0.248949	2.22257	-0.579935	2.75506	0.518413	-0.466874	0.138056	0.0875016	2.4806	-0.145323	0.359984	1.03743
PosCo78_PosCo	positive	not applicable		2.47316	2.62073	2.99302	2.47534	2.27084	2.56867	0.398086	2.51749	0.281008	0.37428	2.14526	1.39239	-2.40807	0.819668	1.30329	0.266409	1.09298	1.15801	2.85162	1.39965	2.37554	1.82704	2.00377	2.53846	5.26518	-0.546539	4.79349	2.4804	-0.180387	1.07318	2.08765	3.33217	0.667865	0.0387296	-0.0322773	1.0831	0.881035	2.80853	1.02652	0.809073	0.703883	0.219047	2.85552	-0.142449	1.81798	0.718244
PosCo79_PosCo	positive	not applicable		2.27301	2.55936	2.18507	2.14255	2.10093	3.08521	1.03291	2.36078	0.862253	0.228849	2.08997	0.523942	-2.43585	1.51068	1.91158	-0.208273	1.38902	1.39917	2.91546	1.88316	2.62059	1.04332	1.73343	2.42851	5.10863	0.521096	4.6862	2.40215	-0.515222	-0.063487	2.35956	2.83236	1.26565	-1.02546	-0.273161	2.07893	0.738273	2.32132	-0.328009	-0.0318638	0.56658	0.576511	2.88575	-0.469334	-0.0675996	0.506858
PosCo80_PosCo	positive	not applicable		0.961774	1.26896	2.1101	1.67911	1.67986	1.95247	0.534354	2.12837	0.0123897	-0.0397208	1.27186	1.60145	-2.65253	1.31198	0.87514	1.05523	1.04118	1.3796	2.11288	0.27527	1.90958	1.38775	1.50538	2.33081	4.79848	-0.690187	4.06707	1.80337	-0.074788	-0.308997	1.74721	2.82209	0.786968	0.135316	0.387035	1.38323	-0.544102	2.5549	0.42446	0.041115	-0.48245	0.00847582	2.5028	-0.458038	1.10951	0.741347
PosCo83_PosCo	positive	not applicable		1.11907	2.86354	3.37052	2.4304	2.4304	3.22631	0.356415	3.42149	1.66314	1.53839	2.85418	1.87189	3.85791	2.05843	3.4297	1.2079	2.56271	3.00053	3.20216	2.50526	2.9487	1.97378	3.07092	3.13726	5.52774	0.575532	5.43581	2.82477	0.608198	0.234379	3.45284	4.03116	2.13105	-0.150911	1.00406	2.54885	0.268321	3.88068	0.341657	1.29258	0.766798	-0.0861418	4.08857	1.19361	2.78689	1.88631
PosCo86_PosCo	positive	not applicable		1.50134	2.25985	1.89428	1.99355	2.1286	1.8497	0.371614	2.71669	1.18965	1.27803	2.28595	1.16882	3.24822	1.99727	2.86559	1.48029	2.38513	2.46992	2.43056	2.03848	1.03672	1.48161	2.26063	1.71047	4.05492	0.18342	4.76908	2.16379	1.22899	0.263675	2.65384	3.42472	1.78122	0.194605	1.30794	2.27065	-0.199285	3.09256	-0.425391	0.250348	0.0101894	-0.352894	2.08031	-0.167866	2.05107	0.847996
PosCo97_PosCo	positive	not applicable		1.08374	1.83711	1.92351	1.35928	1.45205	2.00323	0.834907	2.03592	-1.00888	-0.268912	1.40003	1.25711	2.15867	0.833555	1.26816	1.09507	1.03987	1.56062	2.20017	1.09732	2.15975	0.784031	2.04704	1.97285	4.65183	-0.311048	4.16403	2.3887	-1.18067	-0.0661664	1.26615	2.80411	0.857695	-0.144107	0.129157	1.63467	-1.02999	2.47533	0.918887	-0.037677	-0.250688	-0.891549	2.56277	-1.38948	1.06773	-1.15359
PosCo98_PosCo	positive	not applicable		2.82609	2.92705	3.31761	2.85493	2.72716	3.27611	0.517429	2.97095	0.565552	-0.30554	2.49788	1.80997	3.09764	2.32683	2.16501	1.74716	2.10842	2.64232	3.60737	2.37766	3.38406	2.89037	3.1337	3.26071	5.6899	-0.0932176	5.29388	2.79285	-0.083979	0.821395	2.74545	3.85222	1.87894	0.0870449	0.591953	2.65162	1.34527	3.84523	2.57369	1.33152	0.637416	1.31174	3.64681	-0.272316	1.72354	-0.146037
PosCo99_PosCo	positive	not applicable		1.19991	2.05443	1.53958	1.8074	1.64048	2.28834	0.253623	2.18417	0.420627	-0.685585	1.99713	0.902784	2.36395	1.3694	1.23337	0.533822	1.62401	1.39643	2.0338	1.35046	1.57509	1.86525	2.30909	1.96325	4.563	0.209788	4.15789	2.11964	-0.481246	0.0956847	1.7836	2.99695	1.31769	0.621585	-0.268585	1.94947	0.0613116	2.52969	1.24367	-0.379872	0.21747	0.0470407	2.56462	-0.859894	0.602823	0.0285941
EUcontrol75_NegCo	negative	not applicable		0.957236	1.39926	1.23258	0.388256	1.07985	0.563858	0.336655	-0.467422	-0.433191	-0.57248	0.792296	-0.427268	-1.87188	-0.0514015	1.53294	-0.202999	0.663464	0.629579	1.09911	0.122862	2.04957	0.3816	0.536161	0.253562	1.34196	0.0475398	-0.322014	0.294859	-0.130016	-0.32512	0.16749	0.259982	-0.140095	-0.299108	0.0141624	1.42706	0.796634	1.95281	-0.328222	-0.679468	-0.306421	0.345864	0.549989	-0.449885	0.116715	-0.0813042
EUcontrol76_NegCo	negative	not applicable		1.20603	1.48072	1.60544	1.35607	2.70675	0.678157	0.590931	1.18129	0.636978	-0.43675	0.958416	-0.590749	-2.67274	0.30277	1.72994	-0.109176	0.329398	0.586311	1.50753	0.186972	3.12759	0.948445	0.673595	0.431084	2.02334	-0.270583	0.706968	1.30726	-0.0848847	0.381063	0.941305	-0.349402	-0.385424	-0.473407	-0.394024	1.37525	1.43858	1.05087	-0.0879258	0.0981778	0.332531	1.16288	4.05356	-0.0864054	0.392013	0.494974
EUcontrol77_NegCo	negative	not applicable		1.46804	1.9156	1.7371	1.12695	1.79677	0.583494	0.647802	-0.416599	-0.20847	-0.543954	0.700064	-0.14506	-2.22031	-0.153321	2.45055	0.014141	1.02169	1.52184	1.88549	0.485607	2.39757	0.195027	-0.0526493	-0.180007	1.49854	0.318079	-0.0611665	0.923526	-0.107596	0.245677	0.461361	0.0359793	0.224881	-0.542183	-0.0844693	1.65602	1.35342	1.99564	-0.513648	-0.453682	-0.492017	1.26323	0.915969	0.0934183	0.996545	0.898337
EUcontrol78_NegCo	negative	not applicable		2.14209	0.794312	1.51624	-0.0489019	1.79773	0.488501	-0.82725	-0.246686	-0.488968	0.0581877	0.116017	-0.933861	-2.55242	1.42389	1.24459	-0.182626	-0.524674	-0.347491	1.7562	0.0229389	1.31759	0.674392	0.15643	0.566041	1.0986	-0.927543	0.288534	1.48251	-0.496524	-0.458543	0.910987	0.330044	-0.437435	-0.710269	0.100382	-0.188876	1.82152	1.2053	-0.297481	-0.327582	-0.504058	-0.327582	0.309262	-0.949578	1.50241	0.334669
EUcontrol79_NegCo	negative	not applicable		1.17864	1.77117	1.7031	0.84829	1.49808	0.926016	0.554586	-0.139312	-0.10325	-0.504602	1.03083	-0.0066029	-2.02351	0.252872	2.21998	-0.184379	0.687774	1.4028	0.814892	0.0210057	1.71617	0.627634	0.0889398	-0.255126	1.53746	-0.299464	0.429662	0.830698	-0.241931	0.0415178	0.73976	0.172182	-0.155791	-0.170806	-0.3795	1.12701	1.0807	1.55789	-0.255126	-0.647337	-0.664923	0.187551	0.314626	-0.366978	-0.0123816	0.899465
EUcontrol80_NegCo	negative	not applicable		0.686296	0.581	0.681861	0.396506	0.873586	0.76289	0.320895	-0.482125	-0.249288	-0.112639	1.20617	-0.479612	-2.60574	0.601808	2.19464	-0.180151	0.0453216	0.928216	0.181236	0.354954	0.570591	-0.0314368	1.25752	0.101385	0.918194	0.771688	-0.649467	0.530415	0.53488	0.0424601	0.809706	0.972361	-0.1938	-0.134797	-0.391656	1.51238	0.200229	1.25621	-0.426358	-0.273404	-0.141699	-0.318537	0.29282	-0.747338	-0.355289	-0.387778
EUcontrol83_NegCo	negative	not applicable		0.913265	-0.269447	1.50227	0.688302	1.38602	-0.00988405	-0.000780052	0.197879	0.0007398	0.157892	0.0963627	-0.722872	-0.163537	1.02006	0.618281	0.732322	0.932847	0.998712	1.30001	1.24258	2.11373	1.08046	0.795988	0.210763	1.37064	-0.65683	0.248038	0.30376	-0.17216	-0.43176	0.76235	0.45288	0.29552	0.492118	0.625257	0.952431	-0.138959	1.01295	-0.325618	-0.661531	-0.216298	-0.154886	0.386982	-0.635547	0.53506	-0.0862169
EUcontrol86_NegCo	negative	not applicable		1.48871	0.516759	2.35525	1.03488	1.62004	0.36378	-0.0980331	0.185782	0.00338838	-0.0138054	-0.0138054	-0.380333	-0.38346	0.17131	0.797507	0.644384	0.858441	1.26967	1.15596	1.12842	2.73135	1.33148	1.08318	0.55492	0.852163	-0.457132	-0.244733	-0.125082	-0.185115	-0.572406	-0.202147	-0.152981	0.715759	0.3221	0.950139	1.69897	0.0733393	1.32822	0.0923976	-0.152981	0.0157414	-0.0125812	0.309702	-0.758678	0.14129	-0.411393
EUcontrol97_NegCo	negative	not applicable		1.97705	1.34269	2.89014	1.8186	2.59855	2.10681	0.245961	0.190289	-0.36577	-0.215139	0.386206	-0.592356	2.03017	0.777888	1.93142	0.459497	1.17576	2.02129	1.1073	1.6636	3.01321	1.94714	1.30913	0.7845	-0.206902	-0.179442	-1.3494	0.545801	-1.30331	-0.0916176	0.406577	0.728764	-0.433783	0.721979	1.14909	2.25814	0.879076	2.66975	0.771255	0.142149	1.36153	1.01648	0.629561	-0.894908	0.881173	-1.15117
EUcontrol98_NegCo	negative	not applicable		1.54582	-0.0775046	1.86882	0.75226	0.784705	0.623197	-0.725182	-0.630545	-0.188293	-0.69325	0.0403115	-0.377674	0.960841	-0.0636289	0.624685	0.664835	0.669292	1.19838	0.825841	0.632125	2.45501	1.57735	0.391066	-0.457303	-0.428465	-1.06199	-0.726315	-0.366135	-0.523952	-0.154411	-0.167998	0.892965	0.323036	-0.824078	0.12177	0.846335	0.526382	1.62766	0.768495	-0.467271	-0.57955	-0.434757	-0.113382	-1.06395	-0.599824	-1.07666
EUcontrol99_NegCo	negative	not applicable		1.52822	0.985452	1.99884	0.987287	1.32906	0.493704	-0.295286	-0.317704	-0.25974	-0.696823	-0.215591	-0.174203	0.167794	0.525556	1.06751	0.037985	0.0998093	0.627005	1.06207	-0.0351244	2.16457	0.561214	0.523681	0.218417	0.155206	-0.768066	-0.170871	-0.190816	-0.598996	-0.147461	0.05733	0.454444	-0.139064	-0.322487	-0.559677	1.20839	0.339296	1.93184	-0.0506304	-0.284018	-0.144104	0.296945	-0.0643648	-0.718969	-0.0143605	-0.843768
[truncated: 216 more columns]
