# Supplementary material for: Gene expression profiling of malaria parasites reveals common virulence gene expression in adult first-time infected patients and severe cases
Source: bioRxiv preprint, doi:10.1101/2020.11.13.381137, version 3 (2021-03-23)
Supplement: Table S4 [file 381137_file21.xlsx]

## Sheet: all genes
	GeneID	Chr	Start	Strand	Length	logFC	CI.L	CI.R	AveExpr	t	P.Value	adj.P.Val	B	[Product Description]	[Gene Name or Symbol]
4987	PF3D7_1406600	Pf3D7_14_v3	239747	+	4026	1.79	1.083	2.496	0.6	5.15	1.15e-05	1.15e-05	3.023	ATP-dependent Clp protease regulatory subunit ClpC, putative	ClpC
599	PF3D7_0315400	Pf3D7_03_v3	630611	-	771	1.859	1.11	2.608	0.185	5.049	1.55e-05	1.55e-05	2.76	conserved Plasmodium protein, unknown function	NA
2839	PF3D7_1014700	Pf3D7_10_v3	595308	+	915	0.927	0.539	1.316	4.259	4.851	2.77e-05	2.77e-05	2.494	prohibitin, putative	NA
3173	PF3D7_1106300	Pf3D7_11_v3	263604	-	2967	1.715	0.981	2.449	3.037	4.75	3.74e-05	3.74e-05	2.207	exonuclease, putative	NA
611	PF3D7_0316500	Pf3D7_03_v3	667006	+	1386	2.038	1.151	2.924	-0.271	4.674	4.68e-05	4.68e-05	1.743	kinetochore protein NUF2, putative	NUF2
2334	PF3D7_0903200	Pf3D7_09_v3	133762	-	1826	1.257	0.699	1.815	4.998	4.584	6.1e-05	6.1e-05	1.761	ras-related protein RAB7	RAB7
5630	PF3D7_1469800	Pf3D7_14_v3	2865024	-	1222	1.424	0.787	2.061	2.146	4.544	6.85e-05	6.85e-05	1.626	conserved Plasmodium protein, unknown function	NA
1589	PF3D7_0628800	Pf3D7_06_v3	1185996	-	2649	1.701	0.936	2.467	-0.154	4.519	7.38e-05	7.38e-05	1.395	glutamyl-tRNA(Gln) amidotransferase subunit B	GATB
3708	PF3D7_1208300	Pf3D7_12_v3	388545	+	603	1.461	0.797	2.126	1.912	4.474	8.42e-05	8.42e-05	1.437	mitochondrial ACP precursor, putative	NA
3069	PF3D7_1037100	Pf3D7_10_v3	1469990	-	2238	1.323	0.714	1.931	3.745	4.421	9.83e-05	9.83e-05	1.335	pyruvate kinase 2	PyKII
3534	PF3D7_1141400	Pf3D7_11_v3	1663621	+	1630	2.107	1.134	3.08	-1.189	4.403	0.000103	0.000103	1.044	phosphatidylinositol N-acetylglucosaminyltransferase subunit H, putative	PIGH
2776	PF3D7_1008500	Pf3D7_10_v3	351703	+	3891	-0.613	-0.897	-0.328	6.193	-4.377	0.000112	0.000112	1.173	conserved Plasmodium membrane protein, unknown function	NA
3726	PF3D7_1210000	Pf3D7_12_v3	452595	+	1234	1.602	0.842	2.363	-0.372	4.286	0.000145	0.000145	0.821	50S ribosomal protein L1, apicoplast, putative	RPL1
3949	PF3D7_1232100	Pf3D7_12_v3	1328311	-	3061	0.93	0.487	1.374	4.176	4.264	0.000155	0.000155	0.912	60 kDa chaperonin	CPN60
1374	PF3D7_0608100	Pf3D7_06_v3	337792	+	3969	0.923	0.481	1.365	5.486	4.246	0.000163	0.000163	0.841	conserved Plasmodium protein, unknown function	NA
2582	PF3D7_0927300	Pf3D7_09_v3	1113958	+	2046	1.596	0.818	2.375	-0.36	4.169	0.000204	0.000204	0.534	fumarate hydratase, putative	FH
1841	PF3D7_0721100	Pf3D7_07_v3	916434	+	735	1.294	0.66	1.929	3.681	4.148	0.000217	0.000217	0.612	conserved Plasmodium protein, unknown function	NA
86	PF3D7_0104400	Pf3D7_01_v3	202536	+	1608	0.856	0.426	1.286	4.411	4.047	0.000289	0.000289	0.356	4-hydroxy-3-methylbut-2-enyl diphosphate reductase	LytB
5397	PF3D7_1446700	Pf3D7_14_v3	1919583	-	2063	1.487	0.734	2.24	0.885	4.017	0.000315	0.000315	0.251	conserved Plasmodium protein, unknown function	NA
3065	PF3D7_1036700	Pf3D7_10_v3	1445916	-	1580	1.191	0.577	1.804	2.25	3.946	0.000385	0.000385	0.104	phosducin-like protein, putative	PhLP2
1874	PF3D7_0724400	Pf3D7_07_v3	1023651	+	471	-0.663	-1.008	-0.319	5.298	-3.917	0.000419	0.000419	-0.012	mitochondrial import inner membrane translocase subunit TIM14, putative	PAM18
5632	PF3D7_1470000	Pf3D7_14_v3	2868291	-	1066	1.188	0.567	1.809	-0.099	3.888	0.000455	0.000455	-0.103	autophagy-related protein 12, putative	ATG12
4220	PF3D7_1303800	Pf3D7_13_v3	184845	-	27816	1.259	0.6	1.919	1.164	3.883	0.000462	0.000462	-0.08	conserved Plasmodium protein, unknown function	NA
1579	PF3D7_0627800	Pf3D7_06_v3	1114544	-	2994	-0.687	-1.049	-0.324	7.946	-3.854	0.000501	0.000501	-0.312	acetyl-CoA synthetase, putative	ACS
5332	PF3D7_1440200	Pf3D7_14_v3	1639477	+	7691	1.361	0.64	2.083	0.889	3.835	0.000528	0.000528	-0.192	stromal-processing peptidase, putative	SPP
3776	PF3D7_1214900	Pf3D7_12_v3	618764	+	1348	1.185	0.55	1.821	1.064	3.793	0.000595	0.000595	-0.287	conserved Plasmodium membrane protein, unknown function	NA
3172	PF3D7_1106200	Pf3D7_11_v3	260867	+	2465	1.49	0.691	2.289	-0.863	3.792	0.000596	0.000596	-0.365	conserved Plasmodium protein, unknown function	NA
837	PF3D7_0414100	Pf3D7_04_v3	634029	-	4877	2.127	0.983	3.271	-2.003	3.78	0.000617	0.000617	-0.442	conserved Plasmodium membrane protein, unknown function	NA
1905	PF3D7_0727600	Pf3D7_07_v3	1167441	+	3377	1.32	0.609	2.032	1.33	3.775	0.000625	0.000625	-0.326	conserved Plasmodium protein, unknown function	NA
487	PF3D7_0304500	Pf3D7_03_v3	219117	-	756	1.377	0.635	2.119	1.521	3.775	0.000626	0.000626	-0.332	1-cys-glutaredoxin-like protein-1	GLP1
2278	PF3D7_0831400	Pf3D7_08_v3	1344405	-	1083	1.197	0.549	1.846	4.737	3.755	0.000661	0.000661	-0.436	Plasmodium exported protein, unknown function	NA
2224	PF3D7_0826000	Pf3D7_08_v3	1109276	+	3519	1.015	0.465	1.565	2.814	3.752	0.000666	0.000666	-0.38	conserved Plasmodium protein, unknown function	NA
3522	PF3D7_1140200	Pf3D7_11_v3	1601257	-	1822	1.085	0.496	1.674	5.612	3.746	0.000678	0.000678	-0.507	conserved Plasmodium protein, unknown function	NA
4212	PF3D7_1303100	Pf3D7_13_v3	159024	+	892	0.965	0.438	1.492	3.827	3.724	0.000722	0.000722	-0.489	methyltransferase-like protein, putative	NA
4368	PF3D7_1318300	Pf3D7_13_v3	753910	+	5523	1.299	0.589	2.009	3.175	3.72	0.000729	0.000729	-0.47	conserved Plasmodium protein, unknown function	NA
3995	PF3D7_1236700	Pf3D7_12_v3	1529821	-	1527	1.169	0.529	1.808	2.032	3.717	0.000735	0.000735	-0.46	S-adenosyl-methyltransferase, putative	NA
3398	PF3D7_1128400	Pf3D7_11_v3	1104216	-	2290	0.846	0.383	1.309	5.484	3.714	0.000741	0.000741	-0.553	geranylgeranyl pyrophosphate synthase, putative	GGPPS
1317	PF3D7_0602400	Pf3D7_06_v3	101385	-	3177	1.029	0.463	1.595	3.589	3.698	0.000776	0.000776	-0.518	elongation factor G	EF-G
380	PF3D7_0217400	Pf3D7_02_v3	717692	+	590	0.788	0.353	1.224	3.012	3.679	0.000818	0.000818	-0.559	conserved Plasmodium protein, unknown function	NA
2130	PF3D7_0816600	Pf3D7_08_v3	762118	-	3213	0.934	0.416	1.452	5.087	3.667	0.000846	0.000846	-0.686	chaperone protein ClpB1	ClpB1
610	PF3D7_0316400	Pf3D7_03_v3	662126	-	3027	1.376	0.612	2.139	0.195	3.664	0.000852	0.000852	-0.613	conserved Plasmodium protein, unknown function	NA
828	PF3D7_0413200	Pf3D7_04_v3	603166	-	1291	-2.517	-3.917	-1.118	-3.454	-3.658	0.000868	0.000868	-0.806	rifin	RIF
5286	PF3D7_1435700	Pf3D7_14_v3	1445085	-	4407	1.36	0.602	2.118	2.651	3.648	0.00089	0.00089	-0.644	ataxin-2 like protein, putative	NA
5287	PF3D7_1435700	Pf3D7_14_v3	1445085	-	4407	1.36	0.602	2.118	2.651	3.648	0.00089	0.00089	-0.644	ataxin-2 like protein, putative	NA
5364	PF3D7_1443400	Pf3D7_14_v3	1776958	-	2649	0.886	0.388	1.384	2.878	3.621	0.00096	0.00096	-0.705	WD repeat-containing protein	WLP1
2895	PF3D7_1019800	Pf3D7_10_v3	804328	-	3255	1.322	0.578	2.065	1.731	3.616	0.000975	0.000975	-0.706	tRNA methyltransferase, putative	NA
3389	PF3D7_1127600	Pf3D7_11_v3	1071752	+	2062	1.283	0.559	2.007	2.15	3.603	0.00101	0.00101	-0.739	CRAL/TRIO domain-containing protein, putative	NA
1219	PF3D7_0526000	Pf3D7_05_v3	1075913	-	2421	1.141	0.494	1.788	3.349	3.586	0.00106	0.00106	-0.807	RAP protein, putative	NA
2675	PF3D7_0936400	Pf3D7_09_v3	1440783	+	878	-0.874	-1.37	-0.378	5.631	-3.584	0.00106	0.00106	-0.895	ring-exported protein 4	REX4
3448	PF3D7_1133300	Pf3D7_11_v3	1290501	+	1101	1.439	0.621	2.256	-2.329	3.58	0.00108	0.00108	-0.928	LEM3/CDC50 family protein, putative	NA
3735	PF3D7_1210900	Pf3D7_12_v3	480593	+	2214	1.015	0.437	1.593	0.873	3.569	0.00111	0.00111	-0.84	GPI mannosyltransferase 1	PIGM
1809	PF3D7_0717800	Pf3D7_07_v3	767357	-	4593	0.931	0.4	1.463	3.051	3.564	0.00112	0.00112	-0.84	conserved Plasmodium protein, unknown function	NA
4977	PF3D7_1405600	Pf3D7_14_v3	193216	-	1050	1.051	0.45	1.653	3.02	3.555	0.00115	0.00115	-0.86	ribonucleoside-diphosphate reductase small chain, putative	RNR
1896	PF3D7_0726700	Pf3D7_07_v3	1143303	-	513	0.988	0.419	1.557	0.141	3.532	0.00123	0.00123	-0.92	conserved Plasmodium protein, unknown function	NA
4988	PF3D7_1406700	Pf3D7_14_v3	244908	+	585	1.433	0.608	2.259	-0.891	3.53	0.00123	0.00123	-0.961	vacuolar protein sorting-associated protein 29	VPS29
5209	PF3D7_1428100	Pf3D7_14_v3	1098038	-	1914	-0.583	-0.921	-0.245	5.046	-3.507	0.00131	0.00131	-1.056	WW domain-binding protein 11, putative	NA
5414	PF3D7_1448400	Pf3D7_14_v3	1980319	-	2789	1.083	0.455	1.712	1.591	3.505	0.00132	0.00132	-0.969	ubiquitin-protein ligase, putative	HRD3
5629	PF3D7_1469700	Pf3D7_14_v3	2863914	+	618	1.475	0.613	2.337	-1.664	3.479	0.00142	0.00142	-1.106	mediator of RNA polymerase II transcription subunit 6, putative	MED6
2353	PF3D7_0905000	Pf3D7_09_v3	234501	-	846	1.612	0.669	2.555	-1.839	3.477	0.00143	0.00143	-1.142	conserved Plasmodium protein, unknown function	NA
5365	PF3D7_1443500	Pf3D7_14_v3	1780992	-	2589	1.786	0.74	2.832	0.514	3.472	0.00145	0.00145	-1.051	poly(A)-specific ribonuclease PARN, putative	PARN
1797	PF3D7_0716600	Pf3D7_07_v3	725296	+	1924	1.634	0.673	2.594	0.971	3.459	0.0015	0.0015	-1.079	cysteine desulfurase	SufS
4616	PF3D7_1342800	Pf3D7_13_v3	1679693	+	1752	0.822	0.338	1.307	5.869	3.451	0.00153	0.00153	-1.251	phosphoenolpyruvate carboxykinase	PEPCK
719	PF3D7_0402300	Pf3D7_04_v3	137640	+	9014	1.106	0.452	1.759	1.829	3.441	0.00158	0.00158	-1.119	reticulocyte binding protein homologue 1	RH1
3936	PF3D7_1230800	Pf3D7_12_v3	1263661	+	1933	-0.425	-0.677	-0.174	8.807	-3.436	0.0016	0.0016	-1.446	pre-mRNA-splicing regulator, putative	NA
2327	PF3D7_0902500	Pf3D7_09_v3	109334	-	1996	0.507	0.206	0.808	8.647	3.427	0.00164	0.00164	-1.444	serine/threonine protein kinase, FIKK family	FIKK9.6
2493	PF3D7_0918600	Pf3D7_09_v3	764848	+	2187	0.835	0.339	1.33	2.349	3.424	0.00165	0.00165	-1.164	ATP-dependent DNA helicase Q1	RECQ1
4584	PF3D7_1339600	Pf3D7_13_v3	1588404	+	1887	0.835	0.339	1.331	3.467	3.423	0.00165	0.00165	-1.2	conserved Plasmodium protein, unknown function	NA
3724	PF3D7_1209800	Pf3D7_12_v3	447381	-	570	1.246	0.505	1.986	1.686	3.419	0.00167	0.00167	-1.172	ATP synthase mitochondrial F1 complex assembly factor 1, putative	ATP11
3780	PF3D7_1215300	Pf3D7_12_v3	629009	-	659	1.336	0.537	2.134	1.82	3.401	0.00175	0.00175	-1.223	10 kDa chaperonin	CPN10
249	PF3D7_0204700	Pf3D7_02_v3	205889	-	1515	-0.519	-0.831	-0.208	7.811	-3.392	0.0018	0.0018	-1.509	hexose transporter	HT
2883	PF3D7_1018700	Pf3D7_10_v3	747028	+	1860	-0.482	-0.771	-0.192	8.326	-3.383	0.00184	0.00184	-1.555	conserved Plasmodium protein, unknown function	NA
314	PF3D7_0210900	Pf3D7_02_v3	442080	-	855	-0.39	-0.626	-0.155	8.968	-3.371	0.0019	0.0019	-1.615	conserved Plasmodium protein, unknown function	NA
5631	PF3D7_1469900	Pf3D7_14_v3	2866358	+	1826	1.378	0.547	2.21	-0.133	3.372	0.0019	0.0019	-1.291	conserved Plasmodium protein, unknown function	NA
4137	PF3D7_1250800	Pf3D7_12_v3	2077718	+	5170	0.543	0.215	0.872	7.655	3.367	0.00193	0.00193	-1.564	DNA repair protein rhp16, putative	NA
3980	PF3D7_1235200	Pf3D7_12_v3	1464219	-	3354	-1.146	-1.839	-0.453	1.001	-3.364	0.00194	0.00194	-1.298	V-type K+-independent H+-translocating inorganic pyrophosphatase	VP2
612	PF3D7_0316600	Pf3D7_03_v3	669302	-	1572	1.356	0.541	2.171	8.693	3.402	0.00196	0.00196	-1.626	formate-nitrite transporter	FNT
4464	PF3D7_1327800	Pf3D7_13_v3	1162620	+	1683	-0.771	-1.239	-0.302	7.234	-3.343	0.00205	0.00205	-1.595	ribose-phosphate pyrophosphokinase, putative	NA
1793	PF3D7_0716200	Pf3D7_07_v3	712469	+	2499	-0.528	-0.85	-0.207	9.724	-3.342	0.00206	0.00206	-1.724	conserved Plasmodium protein, unknown function	NA
4044	PF3D7_1241600	Pf3D7_12_v3	1774901	+	1682	1.3	0.509	2.091	-0.172	3.341	0.00206	0.00206	-1.358	mitochondrial carrier protein, putative	NA
1810	PF3D7_0717900	Pf3D7_07_v3	772951	-	2314	0.928	0.361	1.495	3.806	3.328	0.00214	0.00214	-1.442	thioredoxin-like protein	NA
5108	PF3D7_1418300	Pf3D7_14_v3	776672	+	411	0.96	0.371	1.549	2.343	3.316	0.00221	0.00221	-1.421	calmodulin, putative	NA
4858	PF3D7_1367000	Pf3D7_13_v3	2679415	-	1011	0.725	0.28	1.169	5.362	3.316	0.00221	0.00221	-1.538	suppressor of kinetochore protein 1, putative	SKP1
2800	PF3D7_1010900	Pf3D7_10_v3	426601	+	1546	0.812	0.313	1.31	4.147	3.309	0.00225	0.00225	-1.492	conserved Plasmodium protein, unknown function	NA
872	PF3D7_0417500	Pf3D7_04_v3	777200	-	2225	1.046	0.403	1.69	0.83	3.307	0.00226	0.00226	-1.428	memo-like protein	NA
4312	PF3D7_1312700	Pf3D7_13_v3	532270	-	1689	1.028	0.396	1.66	2.38	3.306	0.00227	0.00227	-1.452	probable protein, unknown function	NA
1095	PF3D7_0513600	Pf3D7_05_v3	574941	-	3565	1.259	0.487	2.031	5.573	3.324	0.00228	0.00228	-1.618	deoxyribodipyrimidine photo-lyase, putative	NA
1415	PF3D7_0612100	Pf3D7_06_v3	509160	-	1971	-0.491	-0.795	-0.188	8.745	-3.292	0.00235	0.00235	-1.806	eukaryotic translation initiation factor 3 subunit L, putative	EIF3L
3596	PF3D7_1147700	Pf3D7_11_v3	1897204	+	681	1.647	0.625	2.668	-1.326	3.278	0.00244	0.00244	-1.528	mitochondrial ATP synthase delta subunit, putative	NA
4875	PF3D7_1368700	Pf3D7_13_v3	2727425	-	1731	0.82	0.311	1.329	3.179	3.277	0.00245	0.00245	-1.555	mitochondrial carrier protein, putative	NA
2611	PF3D7_0930100	Pf3D7_09_v3	1191787	-	3453	1.139	0.432	1.847	1.945	3.274	0.00247	0.00247	-1.51	conserved Plasmodium protein, unknown function	NA
5313	PF3D7_1438300	Pf3D7_14_v3	1546224	+	74	-1.963	-3.183	-0.743	-3.205	-3.272	0.00248	0.00248	-1.596	tRNA Methionine	NA
3395	PF3D7_1128100	Pf3D7_11_v3	1094909	-	1023	0.517	0.196	0.839	6.2	3.27	0.00249	0.00249	-1.724	prefoldin subunit 5, putative	NA
2729	PF3D7_1003800	Pf3D7_10_v3	172723	-	3708	-0.536	-0.87	-0.202	8.116	-3.263	0.00254	0.00254	-1.842	U5 small nuclear ribonuclear protein, putative	NA
5355	PF3D7_1442500	Pf3D7_14_v3	1724402	-	3012	0.752	0.281	1.223	3.48	3.244	0.00267	0.00267	-1.626	geranylgeranyl transferase type-2 subunit alpha, putative	NA
3543	PF3D7_1142300	Pf3D7_11_v3	1695507	+	5752	1.158	0.431	1.886	4.966	3.241	0.00273	0.00273	-1.712	conserved Plasmodium membrane protein, unknown function	NA
2389	PF3D7_0908300	Pf3D7_09_v3	383650	-	2067	1.561	0.58	2.542	-0.72	3.237	0.00273	0.00273	-1.607	conserved protein, unknown function	NA
2390	PF3D7_0908300	Pf3D7_09_v3	383650	-	2067	1.561	0.58	2.542	-0.72	3.237	0.00273	0.00273	-1.607	conserved protein, unknown function	NA
3566	PF3D7_1144600	Pf3D7_11_v3	1770949	+	954	-0.516	-0.841	-0.192	6.832	-3.236	0.00273	0.00273	-1.829	transcription initiation factor IIF subunit beta, putative	TFG2
5071	PF3D7_1414600	Pf3D7_14_v3	590626	+	1563	-0.78	-1.271	-0.288	6.401	-3.227	0.0028	0.0028	-1.831	mRNA-capping enzyme subunit alpha	Pgt1
1254	PF3D7_0529400	Pf3D7_05_v3	1199165	+	6023	0.681	0.252	1.11	4.968	3.226	0.00281	0.00281	-1.761	conserved Plasmodium protein, unknown function	NA
1255	PF3D7_0529400	Pf3D7_05_v3	1199165	+	6023	0.681	0.252	1.11	4.968	3.226	0.00281	0.00281	-1.761	conserved Plasmodium protein, unknown function	NA
2738	PF3D7_1004700	Pf3D7_10_v3	220018	-	1336	1.299	0.48	2.118	0.504	3.225	0.00281	0.00281	-1.612	conserved Plasmodium protein, unknown function	NA
600	PF3D7_0315500	Pf3D7_03_v3	632846	-	699	1.682	0.621	2.744	-2.36	3.223	0.00283	0.00283	-1.678	mitochondrial ribosomal protein L29/L47 precursor, putative	NA
3681	PF3D7_1205600	Pf3D7_12_v3	249336	-	2064	0.886	0.325	1.446	5.835	3.214	0.0029	0.0029	-1.84	conserved Plasmodium protein, unknown function	NA
1802	PF3D7_0717100	Pf3D7_07_v3	742010	+	2892	1.137	0.417	1.857	1.626	3.213	0.00291	0.00291	-1.646	conserved Plasmodium protein, unknown function	NA
2365	PF3D7_0906000	Pf3D7_09_v3	298665	-	5515	0.89	0.325	1.454	3.323	3.206	0.00296	0.00296	-1.713	exoribonuclease II	RNaseII
745	PF3D7_0404900	Pf3D7_04_v3	267244	-	1137	0.719	0.262	1.175	5.373	3.202	0.00299	0.00299	-1.812	6-cysteine protein	P41
5094	PF3D7_1416900	Pf3D7_14_v3	685437	-	932	0.913	0.332	1.494	2.413	3.198	0.00302	0.00302	-1.695	prefoldin subunit 2, putative	NA
2538	PF3D7_0923000	Pf3D7_09_v3	939580	-	1008	-0.511	-0.836	-0.185	6.224	-3.19	0.00309	0.00309	-1.898	DNA-directed RNA polymerase II subunit RPB3, putative	RPB3
2673	PF3D7_0936200	Pf3D7_09_v3	1433332	-	777	1.28	0.463	2.097	4.12	3.19	0.00315	0.00315	-1.81	Plasmodium exported protein (hyp11), unknown function	NA
1773	PF3D7_0714200	Pf3D7_07_v3	650834	+	4086	-0.577	-0.946	-0.207	6.911	-3.176	0.00321	0.00321	-1.977	conserved Plasmodium protein, unknown function	NA
2351	PF3D7_0904800	Pf3D7_09_v3	222271	+	1886	0.834	0.3	1.368	4.784	3.175	0.00321	0.00321	-1.874	replication protein A1, small fragment	RPA1
3892	PF3D7_1226500	Pf3D7_12_v3	1072459	+	4518	0.748	0.266	1.229	2.389	3.158	0.00336	0.00336	-1.784	RAP protein, putative	NA
5093	PF3D7_1416800	Pf3D7_14_v3	682778	+	2025	1.056	0.375	1.737	1.587	3.154	0.00339	0.00339	-1.782	lysine--tRNA ligase, putative	NA
1398	PF3D7_0610400	Pf3D7_06_v3	444747	+	411	1.302	0.461	2.142	1.845	3.15	0.00343	0.00343	-1.79	histone H3	H3
172	PF3D7_0112900	Pf3D7_01_v3	486500	+	687	1.221	0.434	2.008	4.368	3.156	0.00343	0.00343	-1.89	Plasmodium exported protein, unknown function	NA
2850	PF3D7_1015600	Pf3D7_10_v3	627044	-	1997	0.891	0.314	1.469	4.879	3.14	0.00352	0.00352	-1.982	heat shock protein 60	HSP60
5351	PF3D7_1442100	Pf3D7_14_v3	1706520	-	993	1.141	0.401	1.881	1.196	3.137	0.00355	0.00355	-1.814	replication factor A protein 3, putative	RPA3
1087	PF3D7_0512800	Pf3D7_05_v3	548406	-	4935	0.909	0.318	1.5	3.147	3.129	0.00363	0.00363	-1.896	conserved Plasmodium protein, unknown function	NA
1174	PF3D7_0521500	Pf3D7_05_v3	878068	+	1695	1.06	0.371	1.749	4.076	3.129	0.00363	0.00363	-1.915	ribosomal large subunit pseudouridylate synthase, putative	NA
5266	PF3D7_1433700	Pf3D7_14_v3	1342484	-	6511	1.106	0.383	1.828	1.345	3.111	0.0038	0.0038	-1.867	conserved Plasmodium protein, unknown function	NA
522	PF3D7_0308000	Pf3D7_03_v3	353549	+	1497	1.617	0.559	2.675	-1.045	3.107	0.00384	0.00384	-1.878	DNA polymerase delta small subunit, putative	NA
4412	PF3D7_1322600	Pf3D7_13_v3	955957	-	1539	-1.178	-1.949	-0.406	-2.056	-3.103	0.00388	0.00388	-1.91	conserved Plasmodium protein, unknown function	NA
2203	PF3D7_0823900	Pf3D7_08_v3	1047551	+	957	0.896	0.307	1.485	3.364	3.095	0.00396	0.00396	-1.973	dicarboxylate/tricarboxylate carrier	DTC
316	PF3D7_0211100	Pf3D7_02_v3	451751	+	3366	1.316	0.451	2.18	0.89	3.095	0.00397	0.00397	-1.899	conserved Plasmodium protein, unknown function	NA
3229	PF3D7_1111900	Pf3D7_11_v3	457936	+	1262	1.454	0.496	2.411	-1.831	3.087	0.00405	0.00405	-1.938	conserved Plasmodium protein, unknown function	NA
2128	PF3D7_0816400	Pf3D7_08_v3	757224	+	984	1.571	0.535	2.606	-2.732	3.085	0.00407	0.00407	-1.966	EF-hand calcium-binding domain-containing protein	NA
4101	PF3D7_1247200	Pf3D7_12_v3	1950989	-	525	-0.715	-1.187	-0.243	3.746	-3.078	0.00415	0.00415	-2.009	conserved Plasmodium protein, unknown function	NA
5067	PF3D7_1414200	Pf3D7_14_v3	564024	-	1224	-0.568	-0.944	-0.192	6.436	-3.071	0.00422	0.00422	-2.199	conserved Plasmodium protein, unknown function	NA
1918	PF3D7_0728800	Pf3D7_07_v3	1230589	+	1592	1.165	0.391	1.94	0.961	3.061	0.00433	0.00433	-1.977	conserved Plasmodium protein, unknown function	NA
833	PF3D7_0413700	Pf3D7_04_v3	619786	-	1017	0.801	0.268	1.333	3.939	3.059	0.00436	0.00436	-2.083	lysine decarboxylase-like protein, putative	NA
562	PF3D7_0311900	Pf3D7_03_v3	509291	-	2307	1.244	0.416	2.071	0.468	3.057	0.00438	0.00438	-1.978	conserved Plasmodium protein, unknown function	NA
535	PF3D7_0309300	Pf3D7_03_v3	397649	+	2868	-0.556	-0.927	-0.186	7.649	-3.054	0.0044	0.0044	-2.328	N2227-like protein, putative	NA
4833	PF3D7_1364500	Pf3D7_13_v3	2596389	+	1434	-0.634	-1.057	-0.211	6.049	-3.047	0.00449	0.00449	-2.235	exosome complex component RRP45, putative	RRP45
3930	PF3D7_1230200	Pf3D7_12_v3	1245535	+	3636	1.185	0.394	1.976	2.68	3.047	0.00449	0.00449	-2.056	vacuolar transporter chaperone, putative, pseudogene	NA
2246	PF3D7_0828200	Pf3D7_08_v3	1216271	+	4446	0.773	0.255	1.29	4.989	3.038	0.0046	0.0046	-2.208	leucine--tRNA ligase, putative	NA
4077	PF3D7_1244900	Pf3D7_12_v3	1877039	+	3003	0.938	0.309	1.567	1.567	3.034	0.00464	0.00464	-2.034	conserved Plasmodium protein, unknown function	NA
5331	PF3D7_1440100	Pf3D7_14_v3	1633211	-	3045	1.589	0.522	2.656	-0.817	3.028	0.00472	0.00472	-2.043	conserved Plasmodium protein, unknown function	NA
5204	PF3D7_1427600	Pf3D7_14_v3	1085603	+	1437	1.035	0.338	1.733	1.446	3.018	0.00484	0.00484	-2.077	CorA-like Mg2+ transporter protein, putative	MIT3
991	PF3D7_0503200	Pf3D7_05_v3	130453	+	2940	0.994	0.324	1.664	1.281	3.017	0.00485	0.00485	-2.067	conserved Plasmodium protein, unknown function	NA
1088	PF3D7_0512900	Pf3D7_05_v3	553990	+	798	0.945	0.306	1.585	1.029	3.005	0.005	0.005	-2.1	AKAP-like protein	AKAL
3216	PF3D7_1110600	Pf3D7_11_v3	425904	-	961	1.075	0.347	1.803	0.318	3.002	0.00504	0.00504	-2.093	mitochondrial ribosomal protein L11 precursor, putative	NA
2114	PF3D7_0815000	Pf3D7_08_v3	709333	-	1268	1.471	0.474	2.468	1.597	3.001	0.0051	0.0051	-2.127	selenoprotein	Sel3
5477	PF3D7_1454700	Pf3D7_14_v3	2241433	+	1407	-0.475	-0.798	-0.152	8.072	-2.991	0.00518	0.00518	-2.502	6-phosphogluconate dehydrogenase, decarboxylating, putative	NA
2706	PF3D7_1001600	Pf3D7_10_v3	86538	-	2472	-1.425	-2.392	-0.458	3.686	-3.002	0.00518	0.00518	-2.203	alpha/beta hydrolase, putative	NA
3109	PF3D7_1041200	Pf3D7_10_v3	1639171	+	1348	-1.331	-2.24	-0.423	0.886	-2.98	0.00533	0.00533	-2.14	rifin	RIF
1821	PF3D7_0719100	Pf3D7_07_v3	838990	-	1035	0.76	0.241	1.279	2.64	2.976	0.00539	0.00539	-2.202	conserved Plasmodium protein, unknown function	NA
1340	PF3D7_0604700	Pf3D7_06_v3	204640	-	1568	1.099	0.348	1.851	0.232	2.977	0.00539	0.00539	-2.148	glyoxalase I	GILP
618	PF3D7_0317200	Pf3D7_03_v3	690154	-	4662	0.779	0.245	1.312	3.352	2.968	0.00551	0.00551	-2.263	cdc2-related protein kinase 4	CRK4
956	PF3D7_0425800	Pf3D7_04_v3	1156423	+	11399	1.628	0.513	2.742	4.428	2.981	0.00562	0.00562	-2.295	erythrocyte membrane protein 1, PfEMP1	VAR
2519	PF3D7_0921100	Pf3D7_09_v3	861392	+	1393	1.202	0.376	2.028	0.981	2.958	0.00565	0.00565	-2.195	conserved Plasmodium protein, unknown function	NA
608	PF3D7_0316300	Pf3D7_03_v3	658272	+	3372	1.4	0.437	2.363	3.279	2.962	0.00576	0.00576	-2.309	inorganic pyrophosphatase, putative	NA
609	PF3D7_0316300	Pf3D7_03_v3	658272	+	3372	1.4	0.437	2.363	3.279	2.962	0.00576	0.00576	-2.309	inorganic pyrophosphatase, putative	NA
4090	PF3D7_1246200	Pf3D7_12_v3	1920784	+	1131	1.062	0.329	1.794	4.362	2.948	0.0058	0.0058	-2.357	actin I	ACT1
4531	PF3D7_1334300	Pf3D7_13_v3	1400897	-	1380	1.154	0.358	1.95	2.788	2.947	0.00581	0.00581	-2.284	MSP7-like protein	MSRP5
5666	PF3D7_1473400	Pf3D7_14_v3	2989577	+	2646	-1.34	-2.266	-0.414	0.569	-2.942	0.00589	0.00589	-2.224	conserved Plasmodium protein, unknown function	NA
2240	PF3D7_0827600	Pf3D7_08_v3	1187623	-	5303	0.978	0.3	1.655	2.193	2.933	0.00602	0.00602	-2.293	conserved Plasmodium protein, unknown function	NA
2011	PF3D7_0804800	Pf3D7_08_v3	278381	+	654	-0.484	-0.819	-0.148	7.117	-2.933	0.00602	0.00602	-2.572	peptidyl-prolyl cis-trans isomerase	CYP24
830	PF3D7_0413400	Pf3D7_04_v3	612798	+	1272	-1.949	-3.301	-0.596	-0.173	-2.934	0.00612	0.00612	-2.246	erythrocyte membrane protein 1 (PfEMP1), exon 1, pseudogene	VAR
3962	PF3D7_1233300	Pf3D7_12_v3	1375346	+	4242	1.273	0.387	2.159	-0.222	2.921	0.00621	0.00621	-2.262	pentatricopeptide repeat domain-containing protein, putative	NA
129	PF3D7_0108600	Pf3D7_01_v3	349995	-	1632	0.596	0.181	1.012	4.602	2.917	0.00627	0.00627	-2.413	conserved Plasmodium protein, unknown function	NA
1444	PF3D7_0614800	Pf3D7_06_v3	615297	-	1314	1.338	0.404	2.272	1.395	2.913	0.00634	0.00634	-2.319	endonuclease III homologue, putative	NA
2644	PF3D7_0933300	Pf3D7_09_v3	1320345	+	2949	1.103	0.333	1.874	1.297	2.911	0.00637	0.00637	-2.302	conserved Plasmodium protein, unknown function	NA
102	PF3D7_0105900	Pf3D7_01_v3	253584	+	1347	1.314	0.396	2.231	-1.474	2.911	0.00637	0.00637	-2.292	DNA binding protein, putative	NA
2733	PF3D7_1004200	Pf3D7_10_v3	187669	-	9286	0.74	0.223	1.258	5.833	2.911	0.00637	0.00637	-2.551	WD repeat-containing protein, putative	NA
5277	PF3D7_1434800	Pf3D7_14_v3	1410139	+	759	0.808	0.243	1.373	3.891	2.909	0.00641	0.00641	-2.455	mitochondrial acidic protein MAM33, putative	NA
4575	PF3D7_1338700	Pf3D7_13_v3	1561255	-	1869	0.928	0.278	1.577	0.403	2.906	0.00646	0.00646	-2.301	conserved Plasmodium protein, unknown function	NA
165	PF3D7_0112200	Pf3D7_01_v3	464726	+	5469	1.035	0.311	1.76	3.596	2.905	0.00646	0.00646	-2.445	multidrug resistance-associated protein 1	MRP1
3912	PF3D7_1228500	Pf3D7_12_v3	1158554	+	1509	1.149	0.344	1.954	1.541	2.903	0.0065	0.0065	-2.318	RNA pseudouridylate synthase, putative	NA
2737	PF3D7_1004600	Pf3D7_10_v3	215717	+	4043	1.351	0.403	2.298	1.536	2.899	0.00656	0.00656	-2.326	conserved Plasmodium membrane protein, unknown function	NA
4268	PF3D7_1308500	Pf3D7_13_v3	393857	-	1080	1.357	0.402	2.311	-0.888	2.891	0.0067	0.0067	-2.322	conserved Plasmodium protein, unknown function	NA
5272	PF3D7_1434300	Pf3D7_14_v3	1372903	+	1695	-0.415	-0.708	-0.123	10.097	-2.888	0.00676	0.00676	-2.846	Hsp70/Hsp90 organizing protein	HOP
3305	PF3D7_1119200	Pf3D7_11_v3	722717	-	573	-0.485	-0.826	-0.143	7.509	-2.887	0.00677	0.00677	-2.703	conserved protein, unknown function	NA
5499	PF3D7_1456800	Pf3D7_14_v3	2329933	-	2154	-0.501	-0.854	-0.148	9.787	-2.885	0.0068	0.0068	-2.839	V-type H(+)-translocating pyrophosphatase, putative	VP1
2660	PF3D7_0934900	Pf3D7_09_v3	1364256	-	1744	0.684	0.202	1.166	5.318	2.885	0.00681	0.00681	-2.54	conserved Plasmodium protein, unknown function	NA
101	PF3D7_0105800	Pf3D7_01_v3	249231	-	2780	1.055	0.307	1.804	0.416	2.869	0.00709	0.00709	-2.374	conserved Plasmodium protein, unknown function	NA
1525	PF3D7_0622600	Pf3D7_06_v3	914743	+	687	1.219	0.355	2.084	-1.231	2.868	0.00711	0.00711	-2.372	cytochrome b-c1 complex subunit 9, putative	QCR9
111	PF3D7_0106800	Pf3D7_01_v3	286951	+	1968	0.892	0.259	1.525	1.99	2.866	0.00714	0.00714	-2.408	ras-related protein Rab-5C	RAB5c
4228	PF3D7_1304500	Pf3D7_13_v3	235800	-	636	0.946	0.274	1.617	0.471	2.864	0.00718	0.00718	-2.387	small heat shock protein, putative	NA
4807	PF3D7_1361900	Pf3D7_13_v3	2482472	-	825	1.144	0.331	1.957	0.815	2.861	0.00723	0.00723	-2.407	proliferating cell nuclear antigen 1	PCNA1
3306	PF3D7_1119300	Pf3D7_11_v3	724855	-	885	-0.459	-0.785	-0.133	7.408	-2.861	0.00723	0.00723	-2.751	splicing factor U2AF small subunit, putative	U2AF1
4585	PF3D7_1339700	Pf3D7_13_v3	1590510	-	5811	0.733	0.212	1.254	3.347	2.859	0.00727	0.00727	-2.505	conserved Plasmodium protein, unknown function	NA
170	PF3D7_0112700	Pf3D7_01_v3	477279	+	4104	-1.644	-2.81	-0.478	7.045	-2.888	0.0074	0.0074	-2.713	28S ribosomal RNA	NA
5200	PF3D7_1427300	Pf3D7_14_v3	1064142	+	5245	0.912	0.262	1.563	2.35	2.851	0.00741	0.00741	-2.448	conserved Plasmodium protein, unknown function	NA
2430	PF3D7_0912200	Pf3D7_09_v3	549085	-	1362	0.819	0.234	1.405	4.269	2.844	0.00754	0.00754	-2.557	conserved Plasmodium membrane protein, unknown function	NA
4425	PF3D7_1323900	Pf3D7_13_v3	989468	+	1131	-0.5	-0.858	-0.142	8.125	-2.839	0.00765	0.00765	-2.857	protein BCP1, putative	NA
2012	PF3D7_0804900	Pf3D7_08_v3	279711	-	1476	-0.475	-0.816	-0.134	6.746	-2.83	0.00781	0.00781	-2.785	GTPase-activating protein, putative	NA
5157	PF3D7_1423000	Pf3D7_14_v3	924964	-	1464	-0.385	-0.661	-0.108	7.964	-2.829	0.00783	0.00783	-2.866	nucleolar GTP-binding protein 2, putative	NOG2
5220	PF3D7_1429100	Pf3D7_14_v3	1142154	+	1638	0.785	0.22	1.35	5.661	2.827	0.00787	0.00787	-2.757	apicoplast ribosomal protein L15 precursor, putative	NA
326	PF3D7_0212100	Pf3D7_02_v3	483436	+	5535	-0.423	-0.727	-0.118	8.056	-2.825	0.00791	0.00791	-2.885	conserved Plasmodium protein, unknown function	NA
363	PF3D7_0215800	Pf3D7_02_v3	650663	-	2700	1.077	0.301	1.853	0.864	2.821	0.00799	0.00799	-2.473	origin recognition complex subunit 5	ORC5
3580	PF3D7_1146000	Pf3D7_11_v3	1821032	-	1938	-0.533	-0.917	-0.149	7.323	-2.821	0.008	0.008	-2.843	ribosome assembly protein 4, putative	RSA4
3296	PF3D7_1118300	Pf3D7_11_v3	694655	+	4467	-0.452	-0.778	-0.126	9.528	-2.817	0.00808	0.00808	-2.98	insulinase, putative	NA
2028	PF3D7_0806500	Pf3D7_08_v3	345427	-	2028	-0.53	-0.914	-0.147	6.989	-2.812	0.00818	0.00818	-2.847	DnaJ protein, putative	NA
4846	PF3D7_1365800	Pf3D7_13_v3	2629861	+	1582	-0.474	-0.817	-0.131	6.023	-2.81	0.00822	0.00822	-2.769	conserved Plasmodium protein, unknown function	NA
683	PF3D7_0323700	Pf3D7_03_v3	991544	-	2082	-0.535	-0.924	-0.146	8.96	-2.799	0.00844	0.00844	-2.986	U4/U6.U5 tri-snRNP-associated protein 1, putative	SART1
2959	PF3D7_1026200	Pf3D7_10_v3	1103464	-	1767	0.902	0.246	1.559	1.929	2.794	0.00855	0.00855	-2.571	conserved Plasmodium protein, unknown function	NA
1794	PF3D7_0716300	Pf3D7_07_v3	717281	+	1688	0.749	0.204	1.295	5.473	2.792	0.0086	0.0086	-2.8	conserved Plasmodium protein, unknown function	NA
792	PF3D7_0409600	Pf3D7_04_v3	452134	-	3438	0.65	0.176	1.123	4.771	2.79	0.00864	0.00864	-2.766	replication protein A1, large subunit	RPA1
480	PF3D7_0303800	Pf3D7_03_v3	194430	+	1782	1.294	0.351	2.238	-0.791	2.789	0.00865	0.00865	-2.527	IBR domain protein, putative	NA
4056	PF3D7_1242800	Pf3D7_12_v3	1805380	-	1977	-0.381	-0.66	-0.103	9.096	-2.785	0.00874	0.00874	-3.034	rab specific GDP dissociation inhibitor	rabGDI
2619	PF3D7_0930800	Pf3D7_09_v3	1225556	+	14020	0.861	0.232	1.49	2.921	2.783	0.00879	0.00879	-2.659	conserved Plasmodium membrane protein, unknown function	NA
1360	PF3D7_0606700	Pf3D7_06_v3	282049	+	4969	-0.37	-0.641	-0.099	9.018	-2.779	0.00888	0.00888	-3.042	coatomer alpha subunit, putative	NA
2329	PF3D7_0902700	Pf3D7_09_v3	119261	-	1489	1.141	0.305	1.978	2.209	2.774	0.00899	0.00899	-2.627	Plasmodium exported protein (PHISTb), unknown function, pseudogene	NA
3283	PF3D7_1117100	Pf3D7_11_v3	652579	+	1398	1.21	0.322	2.098	-1.754	2.77	0.00908	0.00908	-2.566	deubiquinating/deneddylating enzyme	UCH54
5040	PF3D7_1411600	Pf3D7_14_v3	472850	+	1977	0.759	0.201	1.317	0.273	2.768	0.00913	0.00913	-2.573	GTP-binding protein, putative	NA
1789	PF3D7_0715800	Pf3D7_07_v3	695600	-	1305	1.362	0.36	2.364	0.125	2.765	0.0092	0.0092	-2.592	drug/metabolite transporter, putative	DMT1
1079	PF3D7_0512100	Pf3D7_05_v3	528846	-	564	0.857	0.226	1.488	1.696	2.762	0.00927	0.00927	-2.634	conserved Plasmodium protein, unknown function	NA
3859	PF3D7_1223200	Pf3D7_12_v3	932917	+	1365	-0.518	-0.901	-0.136	5.435	-2.756	0.0094	0.0094	-2.843	nucleus export protein BRR6, putative	NA
1578	PF3D7_0627700	Pf3D7_06_v3	1108197	+	3444	-0.47	-0.816	-0.123	9.338	-2.756	0.0094	0.0094	-3.109	transportin	NA
327	PF3D7_0212200	Pf3D7_02_v3	489904	-	915	0.578	0.151	1.005	4.416	2.754	0.00945	0.00945	-2.78	mitochondrial ribosomal protein L12 precursor, putative	NA
2651	PF3D7_0934000	Pf3D7_09_v3	1340065	-	1929	0.581	0.152	1.011	3.379	2.753	0.00948	0.00948	-2.724	histidine--tRNA ligase, putative	NA
161	PF3D7_0111800	Pf3D7_01_v3	446026	+	2824	0.664	0.173	1.154	3.878	2.751	0.00953	0.00953	-2.802	eukaryotic translation initiation factor 4E, putative	NA
983	PF3D7_0502400	Pf3D7_05_v3	109898	-	1794	-0.435	-0.757	-0.113	8.594	-2.747	0.00962	0.00962	-3.092	merozoite surface protein 8	MSP8
913	PF3D7_0421600	Pf3D7_04_v3	986135	+	1313	-1.798	-3.129	-0.466	-1.767	-2.746	0.00964	0.00964	-2.612	erythrocyte membrane protein 1 (PfEMP1)-like pseudogene	VAR
479	PF3D7_0303700	Pf3D7_03_v3	191245	-	1347	1.778	0.462	3.093	-0.875	2.75	0.00964	0.00964	-2.612	lipoamide acyltransferase component of branched-chain alpha-keto acid dehydrogenase complex	BCKDH-E2
2564	PF3D7_0925500	Pf3D7_09_v3	1025493	+	861	0.979	0.253	1.704	-0.081	2.743	0.00971	0.00971	-2.624	thioredoxin-like protein 2	TLP2
3158	PF3D7_1104800	Pf3D7_11_v3	207440	+	2293	0.766	0.197	1.335	2.901	2.738	0.00984	0.00984	-2.783	metabolite/drug transporter, putative	NA
317	PF3D7_0211200	Pf3D7_02_v3	455579	-	708	1.303	0.334	2.271	-0.515	2.736	0.00988	0.00988	-2.637	ras-related protein Rab-5A	RAB5a
1127	PF3D7_0516800	Pf3D7_05_v3	700120	-	7137	-0.703	-1.227	-0.179	3.931	-2.729	0.01	0.01	-2.81	transcription factor with AP2 domain(s)	ApiAP2
2842	PF3D7_1015000	Pf3D7_10_v3	611213	+	987	0.769	0.196	1.343	1.749	2.728	0.0101	0.0101	-2.689	FAD synthetase, putative	NA
358	PF3D7_0215300	Pf3D7_02_v3	628642	-	2667	-0.544	-0.95	-0.138	7.387	-2.723	0.0102	0.0102	-3.068	acyl-CoA synthetase	ACS8
2095	PF3D7_0813000	Pf3D7_08_v3	643086	-	1800	-0.341	-0.595	-0.086	7.724	-2.724	0.0102	0.0102	-3.084	conserved Plasmodium protein, unknown function	NA
5345	PF3D7_1441500	Pf3D7_14_v3	1693137	-	2056	0.559	0.142	0.977	4.176	2.725	0.0102	0.0102	-2.826	conserved Plasmodium protein, unknown function	NA
769	PF3D7_0407400	Pf3D7_04_v3	367845	-	309	0.723	0.183	1.263	2.244	2.723	0.0102	0.0102	-2.735	conserved Plasmodium protein, unknown function	NA
3533	PF3D7_1141300	Pf3D7_11_v3	1659070	-	3290	1.185	0.3	2.07	-1.166	2.723	0.0102	0.0102	-2.658	conserved Plasmodium protein, unknown function	NA
3279	PF3D7_1116700	Pf3D7_11_v3	630779	-	2103	-0.357	-0.623	-0.09	9.999	-2.722	0.0102	0.0102	-3.223	dipeptidyl aminopeptidase 1	DPAP1
5669	PF3D7_1473700	Pf3D7_14_v3	2998594	-	3762	-2.075	-3.617	-0.534	6.902	-2.761	0.0102	0.0102	-2.996	nucleoporin NUP116/NSP116, putative	NUP116
5336	PF3D7_1440600	Pf3D7_14_v3	1656434	+	3307	0.899	0.227	1.572	0.279	2.719	0.0103	0.0103	-2.677	conserved Plasmodium protein, unknown function	NA
2815	PF3D7_1012300	Pf3D7_10_v3	472546	-	841	-0.956	-1.67	-0.241	-0.251	-2.718	0.0103	0.0103	-2.673	cytochrome b-c1 complex subunit 7, putative	QCR7
1223	PF3D7_0526300	Pf3D7_05_v3	1085623	-	972	-0.401	-0.702	-0.101	6.471	-2.716	0.0104	0.0104	-3.016	nucleolar Jumonji domain interacting protein, putative	NA
1288	PF3D7_0532600	Pf3D7_05_v3	1318531	-	699	2.084	0.527	3.642	0.925	2.733	0.0104	0.0104	-2.699	Plasmodium exported protein, unknown function	NA
1868	PF3D7_0723800	Pf3D7_07_v3	993232	+	7002	0.962	0.241	1.683	1.735	2.713	0.0105	0.0105	-2.731	conserved Plasmodium protein, unknown function	NA
4310	PF3D7_1312500	Pf3D7_13_v3	526863	-	198	1.446	0.361	2.53	-0.142	2.71	0.0105	0.0105	-2.683	conserved Plasmodium protein, unknown function	NA
561	PF3D7_0311800	Pf3D7_03_v3	506655	+	2192	0.887	0.221	1.554	1.096	2.706	0.0106	0.0106	-2.717	conserved protein, unknown function	NA
4647	PF3D7_1345900	Pf3D7_13_v3	1835511	-	1289	0.934	0.232	1.636	2.39	2.707	0.0106	0.0106	-2.766	kinetochore protein SPC25, putative	SPC25
2757	PF3D7_1006600	Pf3D7_10_v3	272243	-	582	0.666	0.165	1.166	2.92	2.706	0.0106	0.0106	-2.787	phosducin-like protein, putative	PhLP1
5693	PF3D7_1476200	Pf3D7_14_v3	3133951	+	1701	1.092	0.273	1.911	6.368	2.72	0.0107	0.0107	-3.063	Plasmodium exported protein (PHISTb), unknown function	NA
5020	PF3D7_1409800	Pf3D7_14_v3	383188	+	1545	1.002	0.246	1.758	0.951	2.695	0.0109	0.0109	-2.757	CUGBP Elav-like family member 2, putative	CELF2
3891	PF3D7_1226400	Pf3D7_12_v3	1067470	-	3840	0.548	0.133	0.963	5.864	2.687	0.0112	0.0112	-3.04	conserved Plasmodium protein, unknown function	NA
1333	PF3D7_0604000	Pf3D7_06_v3	163828	-	6033	1.201	0.291	2.11	-2.302	2.685	0.0112	0.0112	-2.731	conserved Plasmodium protein, unknown function	NA
924	PF3D7_0422700	Pf3D7_04_v3	1040470	+	1173	-0.499	-0.877	-0.121	6.546	-2.685	0.0112	0.0112	-3.09	eukaryotic initiation factor 4A-III, putative	EIF4A3
2058	PF3D7_0809500	Pf3D7_08_v3	478512	-	315	-0.64	-1.126	-0.154	4.295	-2.678	0.0114	0.0114	-2.921	histone acetyltransferase subunit NuA4, putative	NA
278	PF3D7_0207500	Pf3D7_02_v3	298897	-	3668	1.635	0.392	2.877	-2.346	2.675	0.0115	0.0115	-2.75	serine repeat antigen 6	SERA6
3881	PF3D7_1225400	Pf3D7_12_v3	1031825	-	741	-0.595	-1.048	-0.142	5.422	-2.669	0.0116	0.0116	-3.027	conserved Plasmodium protein, unknown function	NA
1286	PF3D7_0532400	Pf3D7_05_v3	1312471	+	1684	0.72	0.172	1.267	7.337	2.674	0.0116	0.0116	-3.215	lysine-rich membrane-associated PHISTb protein	LyMP
1056	PF3D7_0509800	Pf3D7_05_v3	410268	+	5041	-0.649	-1.144	-0.154	6.71	-2.667	0.0117	0.0117	-3.148	phosphatidylinositol 4-kinase	PI4K
2994	PF3D7_1029600	Pf3D7_10_v3	1206302	+	1104	-0.435	-0.767	-0.103	8.663	-2.662	0.0118	0.0118	-3.282	adenosine deaminase	ADA
2155	PF3D7_0819100	Pf3D7_08_v3	869562	+	1013	-0.455	-0.803	-0.108	6.18	-2.663	0.0118	0.0118	-3.109	BRIX domain, putative	NA
2905	PF3D7_1020800	Pf3D7_10_v3	840212	+	3192	0.57	0.134	1.006	4.651	2.66	0.0119	0.0119	-2.984	dihydrolipoamide acyltransferase component E2	DLAT
3916	PF3D7_1228900	Pf3D7_12_v3	1180670	-	4814	0.548	0.129	0.968	6.977	2.657	0.012	0.012	-3.184	conserved Plasmodium protein, unknown function	NA
2756	PF3D7_1006500	Pf3D7_10_v3	270535	+	963	1.045	0.245	1.845	0.333	2.657	0.012	0.012	-2.8	conserved Plasmodium protein, unknown function	NA
412	PF3D7_0220500	Pf3D7_02_v3	823825	-	1040	0.76	0.178	1.341	5.388	2.656	0.012	0.012	-3.08	Plasmodium exported protein (hyp2), unknown function	NA
3408	PF3D7_1129500	Pf3D7_11_v3	1141486	+	2425	0.641	0.149	1.132	3.135	2.652	0.0121	0.0121	-2.917	A/G-specific adenine glycosylase, putative	NA
4485	PF3D7_1329900	Pf3D7_13_v3	1269311	+	2124	1.008	0.236	1.781	-0.256	2.655	0.0121	0.0121	-2.795	conserved Plasmodium protein, unknown function	NA
814	PF3D7_0411800	Pf3D7_04_v3	519832	-	5787	1.298	0.303	2.292	-0.045	2.653	0.0121	0.0121	-2.801	conserved Plasmodium protein, unknown function	NA
1358	PF3D7_0606500	Pf3D7_06_v3	265839	-	2561	-0.361	-0.638	-0.085	8.784	-2.655	0.0121	0.0121	-3.3	polypyrimidine tract-binding protein, putative	NA
4754	PF3D7_1356600	Pf3D7_13_v3	2240970	-	1443	-0.797	-1.407	-0.186	4.955	-2.655	0.0121	0.0121	-3.05	regulator of chromosome condensation, putative	NA
518	PF3D7_0307600	Pf3D7_03_v3	325922	+	2462	1.204	0.28	2.128	-1.519	2.651	0.0122	0.0122	-2.793	conserved Plasmodium protein, unknown function	NA
747	PF3D7_0405100	Pf3D7_04_v3	272255	-	4570	-0.471	-0.833	-0.11	7.546	-2.652	0.0122	0.0122	-3.243	protein transport protein Sec24B	SEC24B
1089	PF3D7_0513000	Pf3D7_05_v3	555264	+	810	0.768	0.177	1.359	2.769	2.642	0.0124	0.0124	-2.959	conserved Plasmodium protein, unknown function	NA
4297	PF3D7_1311300	Pf3D7_13_v3	484205	+	1259	0.769	0.176	1.361	1.114	2.639	0.0125	0.0125	-2.857	ATP synthase subunit gamma, mitochondrial	NA
2096	PF3D7_0813100	Pf3D7_08_v3	647316	-	1989	0.785	0.18	1.39	1.661	2.639	0.0125	0.0125	-2.864	conserved Plasmodium protein, unknown function	NA
3844	PF3D7_1221700	Pf3D7_12_v3	865726	+	2856	0.727	0.167	1.286	1.563	2.641	0.0125	0.0125	-2.886	FbpA domain protein, putative	NA
3444	PF3D7_1132900	Pf3D7_11_v3	1273407	+	603	0.673	0.155	1.192	1.338	2.639	0.0125	0.0125	-2.882	glycine cleavage system H protein	GCVH
94	PF3D7_0105200	Pf3D7_01_v3	222254	-	1707	0.955	0.219	1.691	1.461	2.639	0.0125	0.0125	-2.89	RAP protein, putative	NA
1046	PF3D7_0508800	Pf3D7_05_v3	363588	-	855	0.942	0.216	1.669	1.251	2.638	0.0126	0.0126	-2.884	single-stranded DNA-binding protein	SSB
4213	PF3D7_1303200	Pf3D7_13_v3	160488	-	1173	0.88	0.201	1.558	0.475	2.636	0.0126	0.0126	-2.838	SNARE protein, putative	VAMP8
4214	PF3D7_1303200	Pf3D7_13_v3	160488	-	1173	0.88	0.201	1.558	0.475	2.636	0.0126	0.0126	-2.838	SNARE protein, putative	VAMP8
3307	PF3D7_1119400	Pf3D7_11_v3	727896	+	6444	-0.361	-0.639	-0.083	7.683	-2.638	0.0126	0.0126	-3.275	ubiquitin-protein ligase, putative	NA
4598	PF3D7_1341000	Pf3D7_13_v3	1631333	+	74	-0.979	-1.735	-0.223	-1.418	-2.634	0.0127	0.0127	-2.825	tRNA Arginine	NA
4025	PF3D7_1239700	Pf3D7_12_v3	1655487	+	2643	0.674	0.153	1.194	3.16	2.632	0.0128	0.0128	-3.006	ATP-dependent zinc metalloprotease FTSH 1	FTSH1
3592	PF3D7_1147300	Pf3D7_11_v3	1883775	+	4086	1.628	0.371	2.885	1.255	2.64	0.0128	0.0128	-2.901	conserved Plasmodium protein, unknown function	NA
5224	PF3D7_1429500	Pf3D7_14_v3	1164332	+	2235	-0.485	-0.86	-0.109	5.729	-2.626	0.0129	0.0129	-3.147	diphthamide biosynthesis protein 2, putative	DPH2
5474	PF3D7_1454400	Pf3D7_14_v3	2234143	+	2334	-0.366	-0.65	-0.082	9.118	-2.619	0.0131	0.0131	-3.404	aminopeptidase P	APP
1002	PF3D7_0504400	Pf3D7_05_v3	172150	+	2268	1.39	0.311	2.469	-1.67	2.62	0.0131	0.0131	-2.853	ATP-dependent helicase, putative	NA
350	PF3D7_0214500	Pf3D7_02_v3	590501	+	921	0.92	0.206	1.634	0.41	2.62	0.0131	0.0131	-2.872	conserved Plasmodium protein, unknown function	NA
1392	PF3D7_0609800	Pf3D7_06_v3	421157	-	1466	0.621	0.139	1.103	4.093	2.621	0.0131	0.0131	-3.022	palmitoyltransferase DHHC2, putative	DHHC2
3814	PF3D7_1218600	Pf3D7_12_v3	732174	-	2786	-0.417	-0.742	-0.093	6.879	-2.616	0.0133	0.0133	-3.276	arginine--tRNA ligase	RSS
2435	PF3D7_0912800	Pf3D7_09_v3	563329	-	1851	-0.411	-0.73	-0.091	7.058	-2.612	0.0134	0.0134	-3.294	tRNA (adenine(58)-N(1))-methyltransferase non-catalytic subunit TRM6, putative	GCD10
2990	PF3D7_1029200	Pf3D7_10_v3	1195677	+	1668	-0.338	-0.602	-0.075	6.624	-2.613	0.0134	0.0134	-3.251	WD repeat-containing protein, putative	NA
115	PF3D7_0107200	Pf3D7_01_v3	297362	+	2036	1.524	0.335	2.713	-1.999	2.606	0.0136	0.0136	-2.876	carbon catabolite repressor protein 4, putative	NA
3819	PF3D7_1219100	Pf3D7_12_v3	757649	+	5994	-0.418	-0.744	-0.092	8.391	-2.604	0.0136	0.0136	-3.397	clathrin heavy chain, putative	NA
5125	PF3D7_1419900	Pf3D7_14_v3	825612	-	1719	-0.55	-0.979	-0.121	5.763	-2.606	0.0136	0.0136	-3.191	YTH domain-containing protein, putative	NA
4574	PF3D7_1338600	Pf3D7_13_v3	1556659	-	3076	0.975	0.213	1.737	-0.747	2.602	0.0137	0.0137	-2.893	conserved Plasmodium protein, unknown function	NA
4132	PF3D7_1250300	Pf3D7_12_v3	2064987	+	1054	0.699	0.153	1.245	3.441	2.602	0.0137	0.0137	-3.062	vacuolar protein sorting-associated protein 26, putative	VPS26
654	PF3D7_0320800	Pf3D7_03_v3	870817	+	1526	0.971	0.211	1.731	0.936	2.598	0.0138	0.0138	-2.937	ATP-dependent RNA helicase DDX6	DOZI
3265	PF3D7_1115400	Pf3D7_11_v3	584328	-	1479	-0.428	-0.763	-0.093	7.582	-2.6	0.0138	0.0138	-3.357	cysteine proteinase falcipain 3	FP3
5087	PF3D7_1416200	Pf3D7_14_v3	650503	-	6843	0.882	0.192	1.573	4.065	2.598	0.0138	0.0138	-3.066	metacaspase-like protein	MCA3
5728	PF3D7_1479700	Pf3D7_14_v3	3276230	+	1272	-1.18	-2.103	-0.257	0.254	-2.6	0.0138	0.0138	-2.9	rifin	RIF
1034	PF3D7_0507600	Pf3D7_05_v3	313199	+	1959	-0.613	-1.094	-0.133	5.309	-2.594	0.014	0.014	-3.174	cell differentiation protein, putative	CAF40
5025	PF3D7_1410300	Pf3D7_14_v3	403652	-	13411	0.502	0.108	0.895	7.236	2.589	0.0142	0.0142	-3.35	WD repeat-containing protein, putative	NA
4555	PF3D7_1336700	Pf3D7_13_v3	1482361	-	477	-0.454	-0.811	-0.097	6.777	-2.586	0.0143	0.0143	-3.322	conserved Plasmodium protein, unknown function	NA
5229	PF3D7_1430000	Pf3D7_14_v3	1181664	-	1319	0.526	0.112	0.939	4.547	2.584	0.0143	0.0143	-3.179	conserved Plasmodium protein, unknown function	NA
4026	PF3D7_1239800	Pf3D7_12_v3	1660451	+	17304	0.741	0.158	1.325	3.189	2.585	0.0143	0.0143	-3.09	conserved Plasmodium protein, unknown function	NA
3465	PF3D7_1135000	Pf3D7_11_v3	1372311	+	1549	0.699	0.149	1.249	0.656	2.584	0.0143	0.0143	-2.944	PQ-loop repeat-containing protein, unspecified product	NA
3466	PF3D7_1135000	Pf3D7_11_v3	1372311	+	1549	0.699	0.149	1.249	0.656	2.584	0.0143	0.0143	-2.944	PQ-loop repeat-containing protein, unspecified product	NA
3467	PF3D7_1135000	Pf3D7_11_v3	1372311	+	1549	0.699	0.149	1.249	0.656	2.584	0.0143	0.0143	-2.944	PQ-loop repeat-containing protein, unspecified product	NA
2950	PF3D7_1025300	Pf3D7_10_v3	1057890	-	2769	0.841	0.177	1.505	0.538	2.576	0.0146	0.0146	-2.972	conserved Plasmodium protein, unknown function	NA
4207	PF3D7_1302600	Pf3D7_13_v3	142860	-	1236	-0.437	-0.782	-0.091	6.341	-2.572	0.0147	0.0147	-3.316	deoxyhypusine hydroxylase	DOHH
3843	PF3D7_1221600	Pf3D7_12_v3	863810	+	1377	1.542	0.323	2.76	-2.999	2.573	0.0147	0.0147	-2.938	protein TSSC1, putative	NA
1820	PF3D7_0719000	Pf3D7_07_v3	838135	+	462	0.548	0.114	0.981	4.154	2.567	0.0149	0.0149	-3.18	conserved Plasmodium protein, unknown function	NA
2813	PF3D7_1012100	Pf3D7_10_v3	468071	-	1466	1.138	0.236	2.041	-0.192	2.565	0.015	0.015	-2.972	conserved Plasmodium protein, unknown function	NA
1616	PF3D7_0631500	Pf3D7_06_v3	1321320	-	775	-1.448	-2.596	-0.3	-0.464	-2.565	0.015	0.015	-2.958	exported protein family 3	EPF3
1661	PF3D7_0703200	Pf3D7_07_v3	122513	-	4623	0.802	0.166	1.438	4.579	2.562	0.0151	0.0151	-3.222	conserved Plasmodium protein, unknown function	NA
3544	PF3D7_1142400	Pf3D7_11_v3	1702089	-	1554	-0.363	-0.652	-0.074	7.136	-2.558	0.0152	0.0152	-3.415	coproporphyrinogen-III oxidase	CPO
4697	PF3D7_1350900	Pf3D7_13_v3	2027073	-	1566	-1.414	-2.538	-0.29	2.413	-2.562	0.0153	0.0153	-3.069	transcription factor with AP2 domain(s)	ApiAP2
3234	PF3D7_1112400	Pf3D7_11_v3	475880	+	576	1.115	0.227	2.003	-0.046	2.552	0.0154	0.0154	-2.995	conserved Plasmodium protein, unknown function	NA
4319	PF3D7_1313400	Pf3D7_13_v3	569840	-	2493	0.861	0.176	1.546	1.865	2.554	0.0154	0.0154	-3.081	DEAD box helicase, putative	NA
4211	PF3D7_1303000	Pf3D7_13_v3	158144	+	635	0.727	0.147	1.307	3.57	2.549	0.0156	0.0156	-3.21	conserved Plasmodium protein, unknown function	NA
2454	PF3D7_0914700	Pf3D7_09_v3	630657	+	1551	-0.749	-1.348	-0.151	6.343	-2.545	0.0157	0.0157	-3.369	major facilitator superfamily-related transporter, putative	MFR4
4796	PF3D7_1360900	Pf3D7_13_v3	2440438	-	2472	0.872	0.175	1.57	2.873	2.544	0.0158	0.0158	-3.142	polyadenylate-binding protein, putative	NA
5525	PF3D7_1459400	Pf3D7_14_v3	2433361	-	1023	-0.459	-0.827	-0.092	7.219	-2.541	0.0159	0.0159	-3.46	conserved Plasmodium protein, unknown function	NA
1521	PF3D7_0622200	Pf3D7_06_v3	903740	-	2583	-0.425	-0.765	-0.085	7.822	-2.54	0.0159	0.0159	-3.506	radical SAM protein, putative	NA
1280	PF3D7_0531800	Pf3D7_05_v3	1292052	+	159	-1.386	-2.495	-0.277	3.264	-2.547	0.016	0.016	-3.14	5.8S ribosomal RNA	NA
863	PF3D7_0416600	Pf3D7_04_v3	726265	+	864	1.239	0.245	2.234	-0.427	2.535	0.0161	0.0161	-3.022	prohibitin-like protein, putative	NA
3869	PF3D7_1224200	Pf3D7_12_v3	981301	+	3175	0.849	0.167	1.531	1.193	2.53	0.0163	0.0163	-3.072	BRO1 domain-containing protein, putative	NA
4493	PF3D7_1330500	Pf3D7_13_v3	1284988	+	2178	-0.752	-1.356	-0.147	3.761	-2.527	0.0164	0.0164	-3.201	conserved Plasmodium protein, unknown function	NA
4443	PF3D7_1325700	Pf3D7_13_v3	1068050	-	586	1.404	0.275	2.534	-2.212	2.528	0.0164	0.0164	-3.019	conserved Plasmodium protein, unknown function	NA
3333	PF3D7_1122000	Pf3D7_11_v3	838380	-	1721	0.928	0.18	1.676	0.924	2.522	0.0166	0.0166	-3.089	conserved Plasmodium protein, unknown function	NA
166	PF3D7_0112300	Pf3D7_01_v3	473739	+	2149	-1.351	-2.44	-0.262	5.876	-2.536	0.0168	0.0168	-3.367	18S ribosomal RNA	NA
3712	PF3D7_1208700	Pf3D7_12_v3	403350	+	1465	0.598	0.114	1.082	3.208	2.512	0.017	0.017	-3.206	conserved protein, unknown function	NA
2981	PF3D7_1028400	Pf3D7_10_v3	1169940	+	1452	-0.344	-0.623	-0.066	7.322	-2.513	0.017	0.017	-3.518	nucleolar preribosomal assembly protein, putative	NA
1203	PF3D7_0524400	Pf3D7_05_v3	1013453	-	1098	-0.418	-0.756	-0.079	7.81	-2.512	0.017	0.017	-3.558	ribosome-interacting GTPase 1, putative	RBG1
112	PF3D7_0106900	Pf3D7_01_v3	290386	+	2205	0.991	0.187	1.795	0.359	2.507	0.0172	0.0172	-3.093	2-C-methyl-D-erythritol 4-phosphate cytidylyltransferase, putative	IspD
5542	PF3D7_1461000	Pf3D7_14_v3	2482775	+	2312	1.547	0.292	2.801	-1.808	2.506	0.0172	0.0172	-3.06	conserved Plasmodium protein, unknown function	NA
2091	PF3D7_0812600	Pf3D7_08_v3	631584	-	646	-0.513	-0.929	-0.097	4.077	-2.508	0.0172	0.0172	-3.256	ubiquitin-conjugating enzyme, putative	NA
2265	PF3D7_0830100	Pf3D7_08_v3	1280935	+	2827	1.002	0.189	1.815	1.675	2.507	0.0172	0.0172	-3.142	unspecified product	NA
2359	PF3D7_0905600	Pf3D7_09_v3	280207	+	3896	1.009	0.19	1.828	-0.229	2.506	0.0173	0.0173	-3.074	WD repeat-containing protein 66, putative	WDR66
1963	PF3D7_0800200	Pf3D7_08_v3	29700	-	9334	1.529	0.282	2.775	3.106	2.503	0.0179	0.0179	-3.213	erythrocyte membrane protein 1, PfEMP1	VAR
457	PF3D7_0301500	Pf3D7_03_v3	88250	-	982	-0.454	-0.825	-0.083	6.36	-2.491	0.0179	0.0179	-3.486	Plasmodium exported protein, unknown function	NA
1462	PF3D7_0616600	Pf3D7_06_v3	689254	-	1878	0.918	0.167	1.668	-0.572	2.487	0.018	0.018	-3.109	conserved protein, unknown function	NA
4306	PF3D7_1312200	Pf3D7_13_v3	518107	+	1261	1.433	0.261	2.605	-2.956	2.486	0.0181	0.0181	-3.092	conserved Plasmodium protein, unknown function	NA
3700	PF3D7_1207500	Pf3D7_12_v3	348274	+	827	0.707	0.128	1.285	1.6	2.485	0.0181	0.0181	-3.167	RNA-binding protein, putative	NA
1572	PF3D7_0627100	Pf3D7_06_v3	1089190	+	5139	-0.516	-0.94	-0.093	8.705	-2.479	0.0184	0.0184	-3.676	ankyrin-repeat protein, putative	NA
1796	PF3D7_0716500	Pf3D7_07_v3	721717	+	2999	0.855	0.154	1.556	2.298	2.48	0.0184	0.0184	-3.208	conserved Plasmodium protein, unknown function	NA
1996	PF3D7_0803300	Pf3D7_08_v3	208451	+	1841	1.213	0.218	2.207	-1.988	2.479	0.0184	0.0184	-3.107	mitogen-activated protein kinase organizer 1, putative	MORG1
3631	PF3D7_1200600	Pf3D7_12_v3	46788	-	10018	1.128	0.203	2.054	5.202	2.487	0.0185	0.0185	-3.398	erythrocyte membrane protein 1, PfEMP1	VAR2CSA
977	PF3D7_0501800	Pf3D7_05_v3	91361	+	3231	0.967	0.172	1.761	1.092	2.473	0.0186	0.0186	-3.207	chromosome assembly factor 1	CAF1
5201	PF3D7_1427400	Pf3D7_14_v3	1077357	-	2365	0.492	0.087	0.896	4.299	2.473	0.0186	0.0186	-3.366	conserved Plasmodium membrane protein, unknown function	NA
5202	PF3D7_1427400	Pf3D7_14_v3	1077357	-	2365	0.492	0.087	0.896	4.299	2.473	0.0186	0.0186	-3.366	conserved Plasmodium membrane protein, unknown function	NA
2612	PF3D7_0930200	Pf3D7_09_v3	1195693	-	2770	1.704	0.303	3.105	-1.935	2.474	0.0187	0.0187	-3.118	leucine-rich repeat protein	LRR8
78	PF3D7_0103600	Pf3D7_01_v3	161131	+	5099	0.722	0.128	1.316	4.325	2.47	0.0188	0.0188	-3.384	ATP-dependent RNA helicase, putative	NA
4583	PF3D7_1339500	Pf3D7_13_v3	1587028	-	847	0.895	0.158	1.631	0.312	2.469	0.0188	0.0188	-3.165	mitochondrial ribosomal protein L49 precursor, putative	NA
2940	PF3D7_1024300	Pf3D7_10_v3	1022505	+	393	1.325	0.233	2.417	-2.197	2.467	0.0189	0.0189	-3.128	conserved Plasmodium protein, unknown function	NA
4999	PF3D7_1407800	Pf3D7_14_v3	283086	+	1350	-0.342	-0.624	-0.06	9.526	-2.467	0.0189	0.0189	-3.747	plasmepsin IV	PM4
3156	PF3D7_1104700	Pf3D7_11_v3	204593	-	1202	0.812	0.142	1.481	3.149	2.465	0.019	0.019	-3.351	DNA-directed RNA polymerase III subunit RPC8, putative	RPC25
3157	PF3D7_1104700	Pf3D7_11_v3	204593	-	1202	0.812	0.142	1.481	3.149	2.465	0.019	0.019	-3.351	DNA-directed RNA polymerase III subunit RPC8, putative	RPC25
3585	PF3D7_1146600	Pf3D7_11_v3	1834401	+	4373	0.866	0.151	1.581	3.625	2.464	0.0191	0.0191	-3.331	CCAAT-box DNA binding protein subunit B	NFYB
3928	PF3D7_1230000	Pf3D7_12_v3	1233696	+	7592	0.599	0.104	1.093	6.474	2.462	0.0191	0.0191	-3.569	conserved Plasmodium protein, unknown function	NA
4610	PF3D7_1342200	Pf3D7_13_v3	1660812	-	2919	1.128	0.195	2.062	0.707	2.458	0.0193	0.0193	-3.203	conserved Plasmodium membrane protein, unknown function	NA
993	PF3D7_0503400	Pf3D7_05_v3	140710	+	762	1.071	0.184	1.959	1.456	2.454	0.0195	0.0195	-3.227	actin-depolymerizing factor 1	ADF1
392	PF3D7_0218600	Pf3D7_02_v3	755418	+	7143	0.437	0.075	0.799	7.327	2.452	0.0196	0.0196	-3.666	conserved Plasmodium protein, unknown function	NA
1267	PF3D7_0530600	Pf3D7_05_v3	1248368	-	1594	-0.417	-0.763	-0.071	6.261	-2.451	0.0196	0.0196	-3.563	XAP-5 DNA binding protein, putative	NA
469	PF3D7_0302700	Pf3D7_03_v3	146372	-	685	0.981	0.166	1.795	-0.031	2.449	0.0197	0.0197	-3.181	CDGSH iron-sulfur domain-containing protein, putative	NA
3300	PF3D7_1118700	Pf3D7_11_v3	708526	-	4338	0.762	0.129	1.395	0.525	2.45	0.0197	0.0197	-3.196	myosin light chain B	MLC-B
4434	PF3D7_1324800	Pf3D7_13_v3	1036543	-	1989	-0.736	-1.348	-0.125	5.154	-2.449	0.0198	0.0198	-3.497	dihydrofolate synthase/folylpolyglutamate synthase	DHFS-FPGS
5524	PF3D7_1459300	Pf3D7_14_v3	2432177	+	570	0.571	0.097	1.045	2.446	2.449	0.0198	0.0198	-3.266	OPA3-like protein, putative	NA
3493	PF3D7_1137400	Pf3D7_11_v3	1470600	-	1278	0.654	0.111	1.197	3.721	2.447	0.0198	0.0198	-3.384	UVB-resistance protein UVR8 homologue	NA
2591	PF3D7_0928100	Pf3D7_09_v3	1136966	-	1218	-0.644	-1.182	-0.106	2.286	-2.434	0.0204	0.0204	-3.301	conserved Plasmodium protein, unknown function	NA
3187	PF3D7_1107700	Pf3D7_11_v3	326881	+	1932	-0.328	-0.601	-0.054	8.414	-2.434	0.0204	0.0204	-3.754	pescadillo homolog	PES
1155	PF3D7_0519600	Pf3D7_05_v3	812648	+	2268	-0.456	-0.836	-0.075	7.199	-2.434	0.0204	0.0204	-3.687	zinc finger protein, putative	NA
1176	PF3D7_0521700	Pf3D7_05_v3	882376	+	2526	-0.554	-1.018	-0.09	4.78	-2.43	0.0206	0.0206	-3.466	ATP-dependent RNA helicase DDX1, putative	DDX1
4384	PF3D7_1319900	Pf3D7_13_v3	822078	-	4470	-0.927	-1.704	-0.15	2.634	-2.428	0.0207	0.0207	-3.34	conserved Plasmodium protein, unknown function	NA
5562	PF3D7_1463000	Pf3D7_14_v3	2565357	-	927	-0.595	-1.094	-0.097	3.917	-2.429	0.0207	0.0207	-3.405	conserved Plasmodium protein, unknown function	NA
5670	PF3D7_1473900	Pf3D7_14_v3	3007601	+	2559	-0.452	-0.831	-0.073	6.956	-2.426	0.0208	0.0208	-3.667	conserved Plasmodium protein, unknown function	NA
1800	PF3D7_0716900	Pf3D7_07_v3	736370	+	969	0.356	0.058	0.654	5.607	2.427	0.0208	0.0208	-3.576	drug/metabolite transporter, putative	DMT2
4680	PF3D7_1349200	Pf3D7_13_v3	1971890	-	2592	-0.368	-0.677	-0.06	8.907	-2.426	0.0208	0.0208	-3.798	glutamate--tRNA ligase, putative	NA
4298	PF3D7_1311400	Pf3D7_13_v3	487511	+	1314	-0.345	-0.635	-0.055	8.331	-2.42	0.0211	0.0211	-3.788	AP-1 complex subunit mu-1	AP1M1
5684	PF3D7_1475300	Pf3D7_14_v3	3085496	+	687	0.749	0.12	1.379	0.626	2.42	0.0211	0.0211	-3.274	cytochrome c oxidase assembly protein COX11, putative	COX11
1282	PF3D7_0532000	Pf3D7_05_v3	1292410	+	3790	-1.39	-2.557	-0.223	10.675	-2.443	0.0213	0.0213	-3.887	28S ribosomal RNA	NA
1173	PF3D7_0521400	Pf3D7_05_v3	875873	-	1689	0.81	0.128	1.492	3.285	2.414	0.0214	0.0214	-3.427	conserved Plasmodium protein, unknown function	NA
2045	PF3D7_0808200	Pf3D7_08_v3	416344	-	1722	-0.756	-1.393	-0.119	2.336	-2.415	0.0214	0.0214	-3.341	plasmepsin X	NA
2930	PF3D7_1023300	Pf3D7_10_v3	984228	-	1103	1.032	0.162	1.903	-0.075	2.412	0.0215	0.0215	-3.255	conserved Plasmodium protein, unknown function	NA
4586	PF3D7_1339800	Pf3D7_13_v3	1597400	-	219	1.097	0.171	2.023	0.3	2.409	0.0217	0.0217	-3.279	mitotic-spindle organizing protein 1, putative	NA
1054	PF3D7_0509600	Pf3D7_05_v3	403342	+	2301	0.435	0.067	0.803	5.667	2.404	0.0219	0.0219	-3.622	asparagine--tRNA ligase	AsnRS
3392	PF3D7_1127900	Pf3D7_11_v3	1083321	-	1742	0.595	0.092	1.099	3.704	2.404	0.0219	0.0219	-3.46	conserved Plasmodium protein, unknown function	NA
4318	PF3D7_1313300	Pf3D7_13_v3	568664	+	872	0.939	0.144	1.734	-0.723	2.402	0.022	0.022	-3.261	peptidyl-prolyl cis-trans isomerase, putative	NA
5113	PF3D7_1418800	Pf3D7_14_v3	782061	-	303	-1.103	-2.037	-0.17	4.114	-2.407	0.022	0.022	-3.475	signal recognition particle RNA	NA
5151	PF3D7_1422400	Pf3D7_14_v3	900386	+	4893	-0.304	-0.561	-0.046	7.459	-2.401	0.0221	0.0221	-3.762	conserved Plasmodium protein, unknown function	NA
3112	PF3D7_1100200	Pf3D7_11_v3	32666	-	9721	1.89	0.288	3.492	3.638	2.414	0.0224	0.0224	-3.435	erythrocyte membrane protein 1, PfEMP1	VAR
2030	PF3D7_0806700	Pf3D7_08_v3	354472	+	7925	-0.317	-0.587	-0.048	7.903	-2.392	0.0225	0.0225	-3.811	conserved Plasmodium membrane protein, unknown function	NA
3426	PF3D7_1131100	Pf3D7_11_v3	1195988	-	2322	-0.979	-1.812	-0.147	2.367	-2.392	0.0225	0.0225	-3.411	serpentine receptor, putative	SR1
5668	PF3D7_1473600	Pf3D7_14_v3	2997600	-	345	-0.962	-1.78	-0.143	0.722	-2.39	0.0226	0.0226	-3.32	conserved Plasmodium protein, unknown function	NA
1132	PF3D7_0517300	Pf3D7_05_v3	724681	-	1071	-0.299	-0.553	-0.045	9.949	-2.39	0.0226	0.0226	-3.933	serine/arginine-rich splicing factor 1	SR1
4080	PF3D7_1245200	Pf3D7_12_v3	1888250	-	4449	1.307	0.194	2.421	-0.08	2.388	0.0227	0.0227	-3.305	conserved Plasmodium membrane protein, unknown function	NA
4698	PF3D7_1351000	Pf3D7_13_v3	2033838	+	6045	-0.396	-0.733	-0.059	8.648	-2.388	0.0227	0.0227	-3.871	phosphatidylinositol transfer protein, putative	NA
5781	PF3D7_API04900	Pf3D7_API_v3	24053	-	2696	-1.415	-2.622	-0.207	-0.476	-2.383	0.023	0.023	-3.29	large subunit ribosomal RNA	NA
4081	PF3D7_1245300	Pf3D7_12_v3	1893069	+	835	1.189	0.175	2.203	1.085	2.383	0.023	0.023	-3.357	NEDD8-conjugating enzyme UBC12, putative	UBC12
603	PF3D7_0315800	Pf3D7_03_v3	641482	-	1098	-0.36	-0.668	-0.053	6.623	-2.383	0.023	0.023	-3.73	zinc finger protein, putative	NA
2643	PF3D7_0933200	Pf3D7_09_v3	1317827	-	1642	0.788	0.114	1.462	2.091	2.377	0.0233	0.0233	-3.399	calcyclin binding protein, putative	NA
5180	PF3D7_1425300	Pf3D7_14_v3	985365	-	2391	1.49	0.216	2.764	-1.051	2.378	0.0233	0.0233	-3.296	conserved Plasmodium protein, unknown function	NA
5661	PF3D7_1472900	Pf3D7_14_v3	2972978	+	1077	-0.499	-0.925	-0.072	4.307	-2.378	0.0233	0.0233	-3.56	dihydroorotase, putative	NA
148	PF3D7_0110400	Pf3D7_01_v3	393875	-	961	-0.512	-0.951	-0.074	6.574	-2.377	0.0233	0.0233	-3.747	DNA-directed RNA polymerase II subunit RPB9, putative	RPB9
5019	PF3D7_1409700	Pf3D7_14_v3	377285	-	2898	0.746	0.108	1.385	0.985	2.376	0.0234	0.0234	-3.365	conserved Plasmodium protein, unknown function	NA
1423	PF3D7_0612900	Pf3D7_06_v3	531126	+	2061	-0.312	-0.579	-0.045	9.717	-2.375	0.0234	0.0234	-3.948	nucleolar GTP-binding protein 1, putative	NA
3758	PF3D7_1213100	Pf3D7_12_v3	576417	-	164	-1.141	-2.118	-0.165	2.668	-2.379	0.0234	0.0234	-3.43	U1 spliceosomal RNA	NA
4533	PF3D7_1334500	Pf3D7_13_v3	1405731	-	1782	1.015	0.145	1.884	1.438	2.373	0.0235	0.0235	-3.381	MSP7-like protein	MSRP6
4474	PF3D7_1328800	Pf3D7_13_v3	1214907	+	822	-0.483	-0.897	-0.069	6.737	-2.374	0.0235	0.0235	-3.765	transcriptional regulatory protein sir2a	SIR2A
5107	PF3D7_1418200	Pf3D7_14_v3	775460	+	852	0.933	0.132	1.733	1.45	2.368	0.0238	0.0238	-3.412	conserved Plasmodium protein, unknown function	NA
2786	PF3D7_1009500	Pf3D7_10_v3	383044	-	1750	0.794	0.112	1.475	1.631	2.368	0.0238	0.0238	-3.413	metalloprotease, putative	NA
574	PF3D7_0313100	Pf3D7_03_v3	539743	+	3068	0.442	0.062	0.821	5.753	2.368	0.0238	0.0238	-3.733	ubiquitin-protein ligase, putative	HRD3
1807	PF3D7_0717600	Pf3D7_07_v3	758720	-	4158	1.474	0.209	2.74	2.158	2.377	0.0239	0.0239	-3.447	conserved Plasmodium protein, unknown function	NA
2515	PF3D7_0920800	Pf3D7_09_v3	852525	-	1533	-0.506	-0.941	-0.071	8.914	-2.366	0.0239	0.0239	-3.926	inosine-5'-monophosphate dehydrogenase	IMPDH
3481	PF3D7_1136400	Pf3D7_11_v3	1427011	-	2661	-0.327	-0.608	-0.046	8.362	-2.366	0.0239	0.0239	-3.891	signal recognition particle subunit SRP72, putative	SRP72
1205	PF3D7_0524600	Pf3D7_05_v3	1017809	+	774	0.734	0.102	1.366	1.572	2.362	0.0241	0.0241	-3.404	50S ribosomal protein L12, apicoplast, putative	NA
627	PF3D7_0318100	Pf3D7_03_v3	743929	+	1125	0.523	0.073	0.974	3.813	2.363	0.0241	0.0241	-3.553	stomatin-like protein	NA
2027	PF3D7_0806400	Pf3D7_08_v3	344288	+	534	-0.915	-1.704	-0.127	-1.69	-2.36	0.0242	0.0242	-3.318	glycosyltransferase family 28 protein, putative	NA
4608	PF3D7_1342000	Pf3D7_13_v3	1653211	-	921	-0.385	-0.716	-0.053	10.729	-2.359	0.0243	0.0243	-4.042	40S ribosomal protein S6	NA
1817	PF3D7_0718700	Pf3D7_07_v3	831549	-	1374	1.031	0.139	1.923	0.581	2.352	0.0247	0.0247	-3.398	conserved Plasmodium membrane protein, unknown function	NA
1494	PF3D7_0619600	Pf3D7_06_v3	825157	+	2616	1.311	0.178	2.443	1.396	2.356	0.0247	0.0247	-3.441	conserved Plasmodium protein, unknown function	NA
5664	PF3D7_1473200	Pf3D7_14_v3	2981600	+	1365	-1.29	-2.404	-0.177	6.505	-2.372	0.0247	0.0247	-3.779	DnaJ protein, putative	NA
5230	PF3D7_1430100	Pf3D7_14_v3	1184910	+	2133	1.123	0.151	2.095	0.172	2.35	0.0248	0.0248	-3.394	serine/threonine protein phosphatase 2A activator	PTPA
2258	PF3D7_0829400	Pf3D7_08_v3	1257716	-	1326	0.851	0.114	1.588	1.591	2.348	0.0249	0.0249	-3.427	prolyl 4-hydroxylase subunit alpha, putative	NA
1242	PF3D7_0528200	Pf3D7_05_v3	1163408	-	1665	-0.287	-0.536	-0.038	8.916	-2.346	0.025	0.025	-3.968	eukaryotic translation initiation factor 3 subunit E, putative	EIF3E
1225	PF3D7_0526500	Pf3D7_05_v3	1090930	+	4155	-0.453	-0.845	-0.06	6.884	-2.346	0.0251	0.0251	-3.83	conserved Plasmodium protein, unknown function	NA
3925	PF3D7_1229800	Pf3D7_12_v3	1219136	-	7330	1.041	0.137	1.945	-0.903	2.342	0.0253	0.0253	-3.365	myosin D	MyoD
1731	PF3D7_0710000	Pf3D7_07_v3	447515	-	10982	0.818	0.107	1.529	3.518	2.339	0.0255	0.0255	-3.551	conserved Plasmodium protein, unknown function	NA
3888	PF3D7_1226100	Pf3D7_12_v3	1058202	+	951	-0.891	-1.666	-0.116	3.121	-2.338	0.0255	0.0255	-3.538	haloacid dehalogenase-like hydrolase, putative	HAD3
1220	PF3D7_0526100	Pf3D7_05_v3	1079779	+	1230	1.036	0.135	1.938	-0.22	2.337	0.0256	0.0256	-3.393	conserved Plasmodium membrane protein, unknown function	NA
252	PF3D7_0205000	Pf3D7_02_v3	212982	-	1527	-0.86	-1.61	-0.11	1.41	-2.333	0.0258	0.0258	-3.457	conserved Plasmodium protein, unknown function	NA
4012	PF3D7_1238400	Pf3D7_12_v3	1592402	-	1231	0.889	0.114	1.663	-0.264	2.334	0.0258	0.0258	-3.39	conserved Plasmodium protein, unknown function	NA
2393	PF3D7_0908600	Pf3D7_09_v3	399202	-	1524	-0.369	-0.691	-0.047	6.41	-2.333	0.0258	0.0258	-3.812	ribosomal RNA methyltransferase, putative	NA
4563	PF3D7_1337500	Pf3D7_13_v3	1509589	-	10005	0.854	0.109	1.6	7.883	2.341	0.026	0.026	-3.915	conserved Plasmodium protein, unknown function	NA
478	PF3D7_0303600	Pf3D7_03_v3	190180	+	540	1	0.127	1.873	0.58	2.33	0.026	0.026	-3.442	plasmoredoxin	Plrx
2394	PF3D7_0908700	Pf3D7_09_v3	401495	-	1900	0.426	0.054	0.799	3.353	2.327	0.0262	0.0262	-3.592	tRNA pseudouridine synthase, putative	NA
1438	PF3D7_0614200	Pf3D7_06_v3	593172	-	2733	-0.616	-1.156	-0.077	4.459	-2.325	0.0263	0.0263	-3.653	cytosolic Fe-S cluster assembly factor NAR1, putative	NAR1
3221	PF3D7_1111100	Pf3D7_11_v3	437171	-	1050	0.705	0.088	1.323	1.117	2.322	0.0264	0.0264	-3.452	replication factor C subunit 5, putative	RFC5
2849	PF3D7_1015500	Pf3D7_10_v3	624048	-	1848	0.656	0.081	1.231	0.999	2.319	0.0266	0.0266	-3.459	conserved Plasmodium protein, unknown function	NA
1149	PF3D7_0519000	Pf3D7_05_v3	788599	+	882	1.211	0.148	2.274	-1.071	2.316	0.0268	0.0268	-3.414	histone RNA hairpin-binding protein, putative	SLBP
2169	PF3D7_0820500	Pf3D7_08_v3	925113	+	2559	-0.367	-0.689	-0.044	7.39	-2.312	0.0271	0.0271	-3.935	C-13 antigen	NA
1992	PF3D7_0802900	Pf3D7_08_v3	195148	-	531	0.965	0.116	1.814	0.35	2.312	0.0271	0.0271	-3.445	conserved Plasmodium protein, unknown function	NA
4552	PF3D7_1336400	Pf3D7_13_v3	1477961	-	2064	0.559	0.067	1.051	4.682	2.311	0.0271	0.0271	-3.695	RanBPM and CLTH-like protein, putative	NA
3255	PF3D7_1114400	Pf3D7_11_v3	547383	-	1914	1.269	0.151	2.387	-0.368	2.308	0.0273	0.0273	-3.441	conserved Plasmodium protein, unknown function	NA
1012	PF3D7_0505400	Pf3D7_05_v3	236143	-	2223	1.085	0.128	2.041	-0.553	2.306	0.0274	0.0274	-3.435	conserved Plasmodium protein, unknown function	NA
5431	PF3D7_1450100	Pf3D7_14_v3	2051621	-	1503	-0.406	-0.764	-0.048	8.747	-2.306	0.0274	0.0274	-4.034	signal recognition particle subunit SRP54	SRP54
595	PF3D7_0315000	Pf3D7_03_v3	611334	+	681	0.703	0.083	1.323	1.983	2.307	0.0274	0.0274	-3.517	zinc finger protein, putative	NA
3711	PF3D7_1208600	Pf3D7_12_v3	402300	+	228	0.674	0.078	1.27	3.599	2.301	0.0278	0.0278	-3.685	mitochondrial import inner membrane translocase subunit TIM10, putative	TIM10
2858	PF3D7_1016300	Pf3D7_10_v3	650898	-	2670	-1.924	-3.621	-0.226	9.532	-2.327	0.0279	0.0279	-4.09	glycophorin binding protein	GBP
3285	PF3D7_1117300	Pf3D7_11_v3	662000	+	387	-0.508	-0.957	-0.058	5.039	-2.295	0.0281	0.0281	-3.759	conserved Plasmodium protein, unknown function	NA
1751	PF3D7_0712000	Pf3D7_07_v3	527338	-	7794	-1.11	-2.094	-0.127	4.129	-2.301	0.0282	0.0282	-3.702	erythrocyte membrane protein 1, PfEMP1	VAR
840	PF3D7_0414300	Pf3D7_04_v3	649893	-	839	0.423	0.048	0.798	4.175	2.292	0.0283	0.0283	-3.731	Rab5-interacting protein, putative	NA
14	mal_rna_8	Pf_M76611	1638	+	43	-1.093	-2.063	-0.124	-4.333	-2.293	0.0283	0.0283	-3.418	unspecified product	SSUE
1458	PF3D7_0616200	Pf3D7_06_v3	674118	+	2258	0.817	0.092	1.542	1.306	2.291	0.0284	0.0284	-3.529	kinetochore protein NDC80, putative	NDC80
2865	PF3D7_1017000	Pf3D7_10_v3	685578	+	3285	0.961	0.107	1.815	2.126	2.289	0.0285	0.0285	-3.579	DNA polymerase delta catalytic subunit	NA
4516	PF3D7_1332800	Pf3D7_13_v3	1348779	+	744	-0.374	-0.707	-0.041	7.23	-2.286	0.0287	0.0287	-3.979	eukaryotic translation initiation factor 6, putative	NA
1258	PF3D7_0529700	Pf3D7_05_v3	1209006	-	3097	1.07	0.118	2.023	1.595	2.284	0.0288	0.0288	-3.531	conserved Plasmodium protein, unknown function	NA
5100	PF3D7_1417500	Pf3D7_14_v3	726979	-	1401	-0.457	-0.864	-0.05	8.002	-2.285	0.0288	0.0288	-4.027	H/ACA ribonucleoprotein complex subunit 4, putative	CBF5
2640	PF3D7_0932900	Pf3D7_09_v3	1309467	-	477	0.691	0.076	1.307	3.795	2.283	0.0289	0.0289	-3.674	conserved Plasmodium protein, unknown function	NA
1972	PF3D7_0800900	Pf3D7_08_v3	83128	+	777	0.833	0.091	1.575	5.146	2.285	0.0289	0.0289	-3.777	Plasmodium exported protein (hyp7), unknown function, pseudogene	NA
1535	PF3D7_0623600	Pf3D7_06_v3	956765	+	1992	-0.3	-0.568	-0.033	7.749	-2.281	0.029	0.029	-4.017	transcription or splicing factor-like protein, putative	NA
1715	PF3D7_0708500	Pf3D7_07_v3	385583	-	2739	-0.668	-1.263	-0.073	8.52	-2.286	0.0291	0.0291	-4.074	heat shock protein 86 family protein	NA
1595	PF3D7_0629400	Pf3D7_06_v3	1210420	+	2343	0.636	0.067	1.204	3.776	2.272	0.0296	0.0296	-3.78	RNA-binding protein, putative	NA
3302	PF3D7_1118900	Pf3D7_11_v3	716795	+	1618	0.648	0.068	1.229	0.795	2.271	0.0297	0.0297	-3.542	conserved Plasmodium protein, unknown function	NA
2768	PF3D7_1007700	Pf3D7_10_v3	301126	-	4794	0.526	0.054	0.999	5	2.265	0.0301	0.0301	-3.888	transcription factor with AP2 domain(s)	ApiAP2
3045	PF3D7_1034600	Pf3D7_10_v3	1376827	-	933	1.024	0.103	1.945	-2.695	2.262	0.0303	0.0303	-3.476	translation initiation factor IF-3, putative	IF3b
1161	PF3D7_0520200	Pf3D7_05_v3	835314	-	2094	0.562	0.056	1.068	4.517	2.26	0.0305	0.0305	-3.794	conserved Plasmodium protein, unknown function	NA
2708	PF3D7_1001800	Pf3D7_10_v3	96113	-	919	0.477	0.048	0.906	6.932	2.26	0.0305	0.0305	-3.969	Plasmodium exported protein (PHISTc), unknown function	NA
2704	PF3D7_1001400	Pf3D7_10_v3	74661	-	2912	-0.48	-0.914	-0.047	8.617	-2.255	0.0308	0.0308	-4.133	alpha/beta hydrolase, putative	NA
5253	PF3D7_1432400	Pf3D7_14_v3	1275899	-	6747	1.041	0.102	1.98	-1.045	2.255	0.0308	0.0308	-3.512	leucine-rich repeat protein	LRR5
788	PF3D7_0409200	Pf3D7_04_v3	438887	+	1449	-0.362	-0.688	-0.035	7.803	-2.255	0.0308	0.0308	-4.073	protein SOF1, putative	SOF1
301	PF3D7_0209700	Pf3D7_02_v3	400153	-	1707	-0.278	-0.529	-0.027	8.915	-2.255	0.0308	0.0308	-4.148	RING zinc finger protein, putative	NA
3878	PF3D7_1225100	Pf3D7_12_v3	1018506	+	5503	0.725	0.071	1.379	2.961	2.254	0.0309	0.0309	-3.697	isoleucine--tRNA ligase, putative	NA
950	PF3D7_0425250	Pf3D7_04_v3	1138009	-	551	1.82	0.178	3.462	-2.445	2.257	0.0309	0.0309	-3.49	Plasmodium exported protein (PHIST), unknown function, pseudogene	NA
5052	PF3D7_1412800	Pf3D7_14_v3	516574	-	1620	-0.297	-0.564	-0.029	9.166	-2.252	0.031	0.031	-4.164	glycylpeptide N-tetradecanoyltransferase	NMT
1749	PF3D7_0711800	Pf3D7_07_v3	523147	+	135	-1.223	-2.328	-0.119	-4.118	-2.252	0.031	0.031	-3.485	Plasmodium RNA of unknown function RUF6	NA
1482	PF3D7_0618600	Pf3D7_06_v3	775980	-	1856	0.724	0.07	1.377	0.494	2.252	0.031	0.031	-3.577	rhomboid protease ROM10	ROM10
1917	PF3D7_0728700	Pf3D7_07_v3	1226029	-	2686	1.086	0.105	2.068	-0.84	2.25	0.0311	0.0311	-3.526	alpha/beta hydrolase, putative	NA
1910	PF3D7_0728100	Pf3D7_07_v3	1193616	-	16686	1.048	0.099	1.997	-1.781	2.247	0.0314	0.0314	-3.511	conserved Plasmodium membrane protein, unknown function	NA
3856	PF3D7_1222900	Pf3D7_12_v3	923527	+	1672	1.421	0.135	2.707	-2.071	2.246	0.0314	0.0314	-3.513	conserved Plasmodium protein, unknown function	NA
2879	PF3D7_1018300	Pf3D7_10_v3	729809	-	3048	-0.37	-0.704	-0.035	8.067	-2.245	0.0315	0.0315	-4.113	conserved Plasmodium protein, unknown function	NA
2939	PF3D7_1024200	Pf3D7_10_v3	1021292	-	483	1.423	0.134	2.711	-1.816	2.245	0.0315	0.0315	-3.513	RNA-binding protein, putative	NA
340	PF3D7_0213500	Pf3D7_02_v3	543802	-	2094	0.515	0.049	0.981	3.667	2.245	0.0315	0.0315	-3.755	tetratricopeptide repeat protein, putative	NA
371	PF3D7_0216600	Pf3D7_02_v3	686485	+	2061	-0.453	-0.863	-0.042	6.901	-2.243	0.0316	0.0316	-4.032	MtN3-like protein	NA
4337	PF3D7_1315200	Pf3D7_13_v3	639681	-	3210	0.919	0.085	1.752	2.591	2.242	0.0317	0.0317	-3.689	conserved Plasmodium protein, unknown function	NA
2066	PF3D7_0810300	Pf3D7_08_v3	525058	-	2547	0.828	0.077	1.58	1.312	2.241	0.0318	0.0318	-3.63	protein phosphatase PPM5, putative	PPM5
5069	PF3D7_1414400	Pf3D7_14_v3	575496	+	1560	0.472	0.044	0.901	3.684	2.241	0.0318	0.0318	-3.781	serine/threonine protein phosphatase PP1	PP1
1889	PF3D7_0726000	Pf3D7_07_v3	1086570	+	3788	-1.289	-2.459	-0.119	8.915	-2.26	0.032	0.032	-4.151	28S ribosomal RNA	NA
5018	PF3D7_1409600	Pf3D7_14_v3	374800	+	2307	-0.499	-0.953	-0.046	5.68	-2.238	0.032	0.032	-3.927	conserved Plasmodium protein, unknown function	NA
4467	PF3D7_1328100	Pf3D7_13_v3	1184208	+	813	-0.355	-0.677	-0.032	6.996	-2.237	0.032	0.032	-4.066	proteasome subunit beta type-7, putative	NA
4722	PF3D7_1353300	Pf3D7_13_v3	2132068	-	6516	0.425	0.039	0.812	4.25	2.236	0.0321	0.0321	-3.86	conserved Plasmodium protein, unknown function	NA
4385	PF3D7_1320000	Pf3D7_13_v3	829534	+	3777	-0.326	-0.622	-0.03	8.442	-2.236	0.0321	0.0321	-4.157	golgi protein 1	GP1
4636	PF3D7_1344800	Pf3D7_13_v3	1796274	+	1436	0.458	0.041	0.875	6.772	2.236	0.0322	0.0322	-4.067	aspartate carbamoyltransferase	ATCase
2702	PF3D7_1001200	Pf3D7_10_v3	70547	-	273	0.642	0.058	1.227	2.374	2.234	0.0323	0.0323	-3.714	acyl-CoA binding protein, isoform 2, ACBP2	ACBP2
2988	PF3D7_1029100	Pf3D7_10_v3	1190426	+	4591	0.848	0.075	1.622	0.247	2.231	0.0325	0.0325	-3.581	conserved Plasmodium protein, unknown function	NA
2989	PF3D7_1029100	Pf3D7_10_v3	1190426	+	4591	0.848	0.075	1.622	0.247	2.231	0.0325	0.0325	-3.581	conserved Plasmodium protein, unknown function	NA
1959	PF3D7_0732800	Pf3D7_07_v3	1410435	+	1797	1.684	0.149	3.22	1.726	2.24	0.0326	0.0326	-3.644	erythrocyte membrane protein 1 (PfEMP1), exon 2	NA
5359	PF3D7_1442900	Pf3D7_14_v3	1753510	+	10155	-0.403	-0.771	-0.035	9.638	-2.228	0.0327	0.0327	-4.24	protein transport protein SEC7, putative	SEC7
1790	PF3D7_0715900	Pf3D7_07_v3	699239	+	1671	1.017	0.088	1.946	0.616	2.227	0.0328	0.0328	-3.608	cation diffusion facilitator family protein, putative	CDF
684	PF3D7_0323800	Pf3D7_03_v3	998649	+	2934	-0.319	-0.609	-0.028	8.035	-2.227	0.0328	0.0328	-4.153	conserved Plasmodium protein, unknown function	NA
528	PF3D7_0308600	Pf3D7_03_v3	372632	+	1599	-0.366	-0.7	-0.032	7.652	-2.226	0.0329	0.0329	-4.129	pre-mRNA-processing factor 19, putative	PRPF19
3641	PF3D7_1201600	Pf3D7_12_v3	101581	-	1044	0.585	0.05	1.119	1.139	2.224	0.033	0.033	-3.629	NIMA related kinase 3	NEK3
2182	PF3D7_0821800	Pf3D7_08_v3	976074	+	571	0.432	0.037	0.827	7.09	2.224	0.033	0.033	-4.103	protein transport protein SEC61 subunit beta, putative	SEC61B
5360	PF3D7_1443000	Pf3D7_14_v3	1764316	-	3807	-0.74	-1.416	-0.063	1.165	-2.224	0.033	0.033	-3.642	serine/threonine protein kinase	SRPK2
2080	PF3D7_0811600	Pf3D7_08_v3	582983	-	3971	-1.272	-2.435	-0.108	2.955	-2.231	0.0332	0.0332	-3.765	conserved Plasmodium protein, unknown function	NA
2799	PF3D7_1010800	Pf3D7_10_v3	424866	-	900	0.705	0.059	1.352	0.841	2.219	0.0334	0.0334	-3.631	50S ribosomal protein L22, mitochondrial, putative	NA
951	PF3D7_0425300	Pf3D7_04_v3	1141222	+	875	1.44	0.12	2.761	-1.588	2.218	0.0334	0.0334	-3.559	Plasmodium exported protein (PHISTa), unknown function, pseudogene	NA
2371	PF3D7_0906600	Pf3D7_09_v3	320811	-	2532	-0.399	-0.765	-0.033	9.572	-2.219	0.0334	0.0334	-4.254	zinc finger protein, putative	NA
5032	PF3D7_1411000	Pf3D7_14_v3	440541	+	7233	0.626	0.052	1.2	3.01	2.218	0.0335	0.0335	-3.739	conserved Plasmodium protein, unknown function	NA
5033	PF3D7_1411000	Pf3D7_14_v3	440541	+	7233	0.626	0.052	1.2	3.01	2.218	0.0335	0.0335	-3.739	conserved Plasmodium protein, unknown function	NA
4514	PF3D7_1332600	Pf3D7_13_v3	1342012	-	1794	0.528	0.044	1.013	3.771	2.216	0.0336	0.0336	-3.807	apurinic/apyrimidinic endonuclease Apn1, putative	APN1
2938	PF3D7_1024100	Pf3D7_10_v3	1017201	-	3315	0.752	0.061	1.443	1.315	2.213	0.0339	0.0339	-3.67	conserved Plasmodium protein, unknown function	NA
370	PF3D7_0216500	Pf3D7_02_v3	678487	+	5217	0.735	0.058	1.412	2.101	2.207	0.0342	0.0342	-3.722	conserved Plasmodium protein, unknown function	NA
813	PF3D7_0411700	Pf3D7_04_v3	518685	-	417	0.832	0.065	1.598	0.439	2.207	0.0343	0.0343	-3.626	conserved Plasmodium protein, unknown function	NA
3174	PF3D7_1106400	Pf3D7_11_v3	267547	+	351	1.197	0.089	2.304	-2.157	2.197	0.035	0.035	-3.592	conserved Plasmodium protein, unknown function	NA
3628	PF3D7_1200300	Pf3D7_12_v3	30078	-	1184	-1.513	-2.912	-0.113	0.364	-2.202	0.035	0.035	-3.641	rifin	RIF
1210	PF3D7_0525100	Pf3D7_05_v3	1041745	+	2022	-0.337	-0.649	-0.025	9.251	-2.194	0.0353	0.0353	-4.279	acyl-CoA synthetase	ACS10
5235	PF3D7_1430600	Pf3D7_14_v3	1207398	+	2631	0.825	0.06	1.59	-0.289	2.194	0.0353	0.0353	-3.628	exodeoxyribonuclease III, putative	NA
1455	PF3D7_0615900	Pf3D7_06_v3	662435	-	5421	0.702	0.051	1.353	2.969	2.193	0.0354	0.0354	-3.88	conserved Plasmodium protein, unknown function	NA
1443	PF3D7_0614700	Pf3D7_06_v3	612471	+	1928	-0.699	-1.348	-0.049	-0.731	-2.188	0.0357	0.0357	-3.643	conserved Plasmodium protein, unknown function	NA
491	PF3D7_0304900	Pf3D7_03_v3	231793	-	513	-0.436	-0.842	-0.031	5.25	-2.188	0.0358	0.0358	-3.985	conserved Plasmodium protein, unknown function	NA
1683	PF3D7_0705400	Pf3D7_07_v3	264973	-	2466	0.609	0.043	1.175	1.969	2.187	0.0359	0.0359	-3.744	DNA replication licensing factor MCM7	MCM7
4621	PF3D7_1343300	Pf3D7_13_v3	1707731	-	2949	0.454	0.031	0.877	6.07	2.183	0.0361	0.0361	-4.111	conserved Plasmodium protein, unknown function	NA
5342	PF3D7_1441200	Pf3D7_14_v3	1678662	+	825	-0.427	-0.826	-0.029	8.126	-2.183	0.0362	0.0362	-4.246	60S ribosomal protein L1, putative	NA
1776	PF3D7_0714500	Pf3D7_07_v3	664956	+	1212	-0.38	-0.735	-0.025	5.974	-2.179	0.0365	0.0365	-4.078	transcription elongation factor s-II, putative	NA
4550	PF3D7_1336200	Pf3D7_13_v3	1474274	+	1388	0.799	0.053	1.545	3.191	2.177	0.0367	0.0367	-3.887	conserved Plasmodium protein, unknown function	NA
1144	PF3D7_0518500	Pf3D7_05_v3	763532	-	3372	-0.406	-0.785	-0.026	8.254	-2.175	0.0368	0.0368	-4.26	ATP-dependent RNA helicase DDX23, putative	DDX23
2862	PF3D7_1016700	Pf3D7_10_v3	669202	-	2652	-0.358	-0.694	-0.023	8.533	-2.174	0.0368	0.0368	-4.27	Plasmodium exported protein (PHISTc), unknown function	NA
5130	PF3D7_1420400	Pf3D7_14_v3	846508	+	2670	-0.314	-0.608	-0.02	9.147	-2.173	0.037	0.037	-4.321	glycine--tRNA ligase	GlyRS
4489	PF3D7_1330200	Pf3D7_13_v3	1275104	+	796	0.549	0.035	1.062	2.88	2.172	0.0371	0.0371	-3.831	conserved Plasmodium protein, unknown function	NA
4262	PF3D7_1307900	Pf3D7_13_v3	351840	-	2979	1.204	0.076	2.331	-3.286	2.171	0.0371	0.0371	-3.619	tripartite motif protein, putative	NA
1585	PF3D7_0628400	Pf3D7_06_v3	1176265	+	2323	0.676	0.042	1.31	2.911	2.169	0.0373	0.0373	-3.814	conserved Plasmodium membrane protein, unknown function	NA
3586	PF3D7_1146700	Pf3D7_11_v3	1839423	-	3456	1.055	0.066	2.043	-2.517	2.169	0.0373	0.0373	-3.63	kinesin-like protein, putative	NA
4444	PF3D7_1325800	Pf3D7_13_v3	1071146	+	4602	0.773	0.048	1.499	1.903	2.168	0.0374	0.0374	-3.811	conserved Plasmodium protein, unknown function	NA
945	PF3D7_0424800	Pf3D7_04_v3	1123986	+	1019	0.664	0.041	1.288	6.748	2.169	0.0374	0.0374	-4.13	Plasmodium exported protein (PHISTb), unknown function	NA
4118	PF3D7_1248900	Pf3D7_12_v3	2002723	-	1308	-0.418	-0.811	-0.025	6.704	-2.165	0.0376	0.0376	-4.183	26S protease regulatory subunit 8, putative	RPT6
5335	PF3D7_1440500	Pf3D7_14_v3	1654047	+	1662	0.725	0.044	1.407	3.414	2.163	0.0377	0.0377	-3.947	allantoicase, putative	NA
1419	PF3D7_0612500	Pf3D7_06_v3	522300	-	366	0.527	0.032	1.022	2.183	2.165	0.0377	0.0377	-3.805	conserved Plasmodium protein, unknown function	NA
3421	PF3D7_1130600	Pf3D7_11_v3	1176441	+	3265	-0.451	-0.876	-0.027	5.795	-2.161	0.0379	0.0379	-4.109	methyltransferase, putative	NA
2014	PF3D7_0805100	Pf3D7_08_v3	286959	+	1662	-0.704	-1.368	-0.041	0.582	-2.158	0.0382	0.0382	-3.727	conserved Plasmodium protein, unknown function	NA
4535	PF3D7_1334700	Pf3D7_13_v3	1411100	-	609	-0.517	-1.003	-0.03	7.712	-2.158	0.0382	0.0382	-4.243	MSP7-like protein	MSRP7
1816	PF3D7_0718600	Pf3D7_07_v3	826837	+	4469	0.765	0.043	1.487	1.492	2.154	0.0385	0.0385	-3.793	conserved Plasmodium protein, unknown function	NA
1116	PF3D7_0515700	Pf3D7_05_v3	653966	-	1371	1.1	0.062	2.139	0.466	2.154	0.0385	0.0385	-3.747	glideosome-associated protein 40, putative	GAP40
1491	PF3D7_0619300	Pf3D7_06_v3	803374	-	11179	0.538	0.03	1.046	3.253	2.153	0.0386	0.0386	-3.896	conserved Plasmodium protein, unknown function	NA
2135	PF3D7_0817100	Pf3D7_08_v3	774299	+	2493	0.844	0.047	1.641	0.177	2.153	0.0386	0.0386	-3.731	tRNA modification GTPase, putative	NA
2440	PF3D7_0913300	Pf3D7_09_v3	576960	-	2067	-0.409	-0.795	-0.022	8.528	-2.151	0.0388	0.0388	-4.336	conserved Plasmodium protein, unknown function	NA
997	PF3D7_0503900	Pf3D7_05_v3	153889	-	2169	0.9	0.049	1.751	0.1	2.151	0.0388	0.0388	-3.734	conserved Plasmodium protein, unknown function	NA
2622	PF3D7_0931100	Pf3D7_09_v3	1254815	+	2478	-0.349	-0.68	-0.019	10.362	-2.151	0.0388	0.0388	-4.425	nucleolar protein Nop52, putative	NA
2138	PF3D7_0817400	Pf3D7_08_v3	794287	-	3520	0.735	0.04	1.431	1.105	2.15	0.0388	0.0388	-3.783	phosphatase, putative	NA
1724	PF3D7_0709300	Pf3D7_07_v3	413560	-	8190	-0.436	-0.848	-0.024	6.289	-2.15	0.0389	0.0389	-4.179	Cg2 protein, putative	CG2
4218	PF3D7_1303600	Pf3D7_13_v3	178783	+	571	-0.582	-1.133	-0.032	2.427	-2.15	0.0389	0.0389	-3.837	conserved Plasmodium protein, unknown function	NA
3926	PF3D7_1229900	Pf3D7_12_v3	1228063	-	4943	0.689	0.037	1.341	2.623	2.15	0.0389	0.0389	-3.845	conserved Plasmodium protein, unknown function	NA
3927	PF3D7_1229900	Pf3D7_12_v3	1228063	-	4943	0.689	0.037	1.341	2.623	2.15	0.0389	0.0389	-3.845	conserved Plasmodium protein, unknown function	NA
602	PF3D7_0315700	Pf3D7_03_v3	638283	+	3024	-0.425	-0.828	-0.022	4.337	-2.146	0.0392	0.0392	-3.981	conserved Plasmodium membrane protein, unknown function	NA
4455	PF3D7_1326900	Pf3D7_13_v3	1129363	-	3684	-0.893	-1.74	-0.046	4.128	-2.147	0.0393	0.0393	-3.978	conserved Plasmodium membrane protein, unknown function	NA
5127	PF3D7_1420100	Pf3D7_14_v3	832335	-	4350	0.684	0.036	1.332	0.317	2.146	0.0393	0.0393	-3.733	conserved Plasmodium protein, unknown function	NA
4892	PF3D7_1370500	Pf3D7_13_v3	2794237	+	615	1.539	0.079	2.999	5.282	2.161	0.0396	0.0396	-4.137	unspecified product	NA
2118	PF3D7_0815400	Pf3D7_08_v3	725781	-	722	0.788	0.04	1.537	-0.124	2.141	0.0397	0.0397	-3.74	conserved Apicomplexan protein, unknown function	NA
2663	PF3D7_0935200	Pf3D7_09_v3	1368594	-	3444	-0.495	-0.965	-0.025	8.758	-2.141	0.0397	0.0397	-4.357	vacuolar protein sorting-associated protein 33, putative	VPS33
1440	PF3D7_0614400	Pf3D7_06_v3	604573	+	768	-0.336	-0.656	-0.017	6.458	-2.139	0.0398	0.0398	-4.213	pre-mRNA-splicing factor CWF7, putative	CWF7
3727	PF3D7_1210100	Pf3D7_12_v3	455304	-	933	0.749	0.037	1.461	0.644	2.138	0.0399	0.0399	-3.801	syntaxin, Qa-SNARE family	SYN2
3233	PF3D7_1112300	Pf3D7_11_v3	471946	-	2729	1.353	0.066	2.641	-1.441	2.137	0.04	0.04	-3.698	conserved Plasmodium protein, unknown function	NA
3688	PF3D7_1206300	Pf3D7_12_v3	281020	-	8283	-0.977	-1.907	-0.047	3.621	-2.139	0.0401	0.0401	-3.978	conserved Plasmodium protein, unknown function	NA
1717	PF3D7_0708700	Pf3D7_07_v3	391502	-	687	-0.548	-1.071	-0.026	4.105	-2.135	0.0402	0.0402	-3.986	Cg8 protein	NA
1389	PF3D7_0609500	Pf3D7_06_v3	402722	+	4521	0.785	0.036	1.534	0.415	2.131	0.0405	0.0405	-3.768	conserved Plasmodium protein, unknown function	NA
2533	PF3D7_0922500	Pf3D7_09_v3	913230	+	1251	-0.453	-0.885	-0.021	9.519	-2.131	0.0406	0.0406	-4.432	phosphoglycerate kinase	PGK
3996	PF3D7_1236800	Pf3D7_12_v3	1532248	+	1830	0.905	0.041	1.768	-1.101	2.129	0.0407	0.0407	-3.732	protein-S-isoprenylcysteine O-methyltransferase, putative	NA
156	PF3D7_0111300	Pf3D7_01_v3	431539	-	3504	1.181	0.053	2.308	-0.835	2.129	0.0407	0.0407	-3.749	replication factor c protein, putative	NA
2356	PF3D7_0905300	Pf3D7_09_v3	251353	-	18357	0.464	0.021	0.908	4.194	2.127	0.0408	0.0408	-3.999	dynein heavy chain, putative	NA
5526	PF3D7_1459500	Pf3D7_14_v3	2436695	+	2922	-0.671	-1.312	-0.029	1.217	-2.127	0.0409	0.0409	-3.818	conserved Plasmodium protein, unknown function	NA
1838	PF3D7_0720800	Pf3D7_07_v3	899751	+	1387	0.514	0.023	1.005	3.57	2.127	0.0409	0.0409	-3.958	Ham1-like protein, putative	NA
3396	PF3D7_1128200	Pf3D7_11_v3	1097117	+	411	-0.409	-0.799	-0.018	6.315	-2.127	0.0409	0.0409	-4.209	multiprotein-bridging factor 1, putative	MBF1
2008	PF3D7_0804500	Pf3D7_08_v3	250083	+	18355	0.347	0.015	0.679	7.046	2.124	0.0411	0.0411	-4.293	conserved Plasmodium membrane protein, unknown function	NA
2635	PF3D7_0932400	Pf3D7_09_v3	1292117	-	1527	0.771	0.033	1.509	1.015	2.124	0.0411	0.0411	-3.81	peptide chain release factor 1	RF1
1136	PF3D7_0517700	Pf3D7_05_v3	743179	+	2151	-0.309	-0.605	-0.013	9.824	-2.123	0.0412	0.0412	-4.455	eukaryotic translation initiation factor 3 subunit B, putative	EIF3B
3209	PF3D7_1109900	Pf3D7_11_v3	397124	+	652	-0.245	-0.48	-0.01	8.363	-2.123	0.0413	0.0413	-4.373	60S ribosomal protein L36	RPL36
2451	PF3D7_0914400	Pf3D7_09_v3	617963	+	1873	-0.652	-1.277	-0.027	1.347	-2.122	0.0414	0.0414	-3.816	conserved Plasmodium protein, unknown function	NA
190	PF3D7_0114800	Pf3D7_01_v3	569485	-	788	-1.042	-2.043	-0.042	-1.349	-2.119	0.0416	0.0416	-3.732	Plasmodium exported protein (hyp7), unknown function	NA
4504	PF3D7_1331600	Pf3D7_13_v3	1316496	-	1311	0.949	0.038	1.86	0.541	2.119	0.0416	0.0416	-3.781	protein tyrosine phosphatase-like protein, putative	PTPLA
2942	PF3D7_1024500	Pf3D7_10_v3	1026120	+	795	0.889	0.034	1.745	1.679	2.115	0.042	0.042	-3.857	conserved Plasmodium protein, unknown function	NA
1511	PF3D7_0621300	Pf3D7_06_v3	873809	+	2382	-0.314	-0.616	-0.012	7.962	-2.114	0.0421	0.0421	-4.362	mRNA binding Pumilio-homology domain protein, putative	NA
3696	PF3D7_1207100	Pf3D7_12_v3	324336	-	2523	-0.326	-0.639	-0.012	9.998	-2.114	0.0421	0.0421	-4.477	small subunit rRNA processing factor, putative	NA
1211	PF3D7_0525200	Pf3D7_05_v3	1045462	+	5792	0.474	0.018	0.93	5.39	2.113	0.0421	0.0421	-4.131	structural maintenance of chromosomes protein 6, putative	SMC6
783	PF3D7_0408800	Pf3D7_04_v3	422011	-	948	-1.007	-1.976	-0.038	-3.983	-2.112	0.0422	0.0422	-3.706	conserved Plasmodium protein, unknown function	NA
4904	PF3D7_1372100	Pf3D7_13_v3	2837053	+	2006	0.825	0.03	1.62	2.369	2.111	0.0424	0.0424	-3.952	Plasmodium exported protein (PHISTb), unknown function	GEXP04
3903	PF3D7_1227600	Pf3D7_12_v3	1124788	+	3553	0.66	0.024	1.297	2.98	2.109	0.0425	0.0425	-3.944	cyclin related protein, putative	NA
2919	PF3D7_1022200	Pf3D7_10_v3	926831	-	2190	0.483	0.017	0.948	4.1	2.108	0.0426	0.0426	-4.054	conserved Plasmodium membrane protein, unknown function	NA
4984	PF3D7_1406300	Pf3D7_14_v3	228410	+	1428	-0.705	-1.386	-0.025	5.712	-2.109	0.0427	0.0427	-4.194	glycerophosphodiester phosphodiesterase	GDPD
2735	PF3D7_1004400	Pf3D7_10_v3	207000	-	2643	0.566	0.02	1.113	5.594	2.106	0.0428	0.0428	-4.245	RNA-binding protein, putative	NA
2781	PF3D7_1009000	Pf3D7_10_v3	371293	+	825	-0.309	-0.607	-0.01	6.268	-2.104	0.0429	0.0429	-4.242	diphthine methyl ester synthase, putative	DPH5
2153	PF3D7_0818900	Pf3D7_08_v3	860384	+	2034	-0.557	-1.095	-0.019	13.003	-2.113	0.0429	0.0429	-4.638	heat shock protein 70	HSP70
488	PF3D7_0304600	Pf3D7_03_v3	221323	-	1194	1.031	0.035	2.027	6.241	2.115	0.043	0.043	-4.245	circumsporozoite (CS) protein	CSP
1365	PF3D7_0607200	Pf3D7_06_v3	301874	-	1417	0.76	0.024	1.496	0.065	2.099	0.0434	0.0434	-3.803	RING zinc finger protein, putative	NA
2245	PF3D7_0828100	Pf3D7_08_v3	1212337	-	3294	0.784	0.024	1.544	1.821	2.098	0.0436	0.0436	-3.911	conserved Plasmodium protein, unknown function	NA
2071	PF3D7_0810800	Pf3D7_08_v3	548200	+	2417	0.873	0.027	1.718	6.268	2.107	0.0436	0.0436	-4.295	hydroxymethyldihydropterin pyrophosphokinase-dihydropteroate synthase	PPPK-DHPS
1388	PF3D7_0609400	Pf3D7_06_v3	399813	-	1812	0.665	0.02	1.311	2.984	2.096	0.0437	0.0437	-4.004	mitochondrial cardiolipin synthase, putative	CLS
2366	PF3D7_0906100	Pf3D7_09_v3	305070	+	1557	0.579	0.017	1.141	1.149	2.096	0.0437	0.0437	-3.857	vacuolar protein sorting-associated protein 46, putative	VPS46
1667	PF3D7_0703800	Pf3D7_07_v3	149804	+	3177	-0.613	-1.21	-0.017	3.84	-2.092	0.0441	0.0441	-4.044	conserved Plasmodium protein, unknown function	NA
4784	PF3D7_1359600	Pf3D7_13_v3	2371882	+	6078	0.779	0.021	1.537	4.556	2.091	0.0444	0.0444	-4.137	conserved Plasmodium protein, unknown function	NA
3965	PF3D7_1233700	Pf3D7_12_v3	1403139	+	1746	0.621	0.016	1.226	1.59	2.089	0.0444	0.0444	-3.89	homocysteine S-methyltransferase, putative	NA
417	PF3D7_0221000	Pf3D7_02_v3	848092	+	1028	-0.868	-1.713	-0.023	-2.244	-2.089	0.0444	0.0444	-3.76	Plasmodium exported protein, unknown function	NA
388	PF3D7_0218200	Pf3D7_02_v3	743289	-	2424	0.534	0.014	1.053	3.488	2.088	0.0445	0.0445	-4.074	conserved Plasmodium protein, unknown function	NA
4435	PF3D7_1324900	Pf3D7_13_v3	1041157	+	951	-0.382	-0.754	-0.01	10.753	-2.088	0.0445	0.0445	-4.577	L-lactate dehydrogenase	LDH
2514	PF3D7_0920700	Pf3D7_09_v3	849515	+	1782	0.789	0.02	1.557	0.398	2.086	0.0446	0.0446	-3.842	conserved Plasmodium protein, unknown function	NA
4284	PF3D7_1310000	Pf3D7_13_v3	448907	+	762	1.115	0.028	2.201	-2.802	2.086	0.0446	0.0446	-3.759	mitochondrial ATP synthase delta subunit, putative	OSCP
3379	PF3D7_1126600	Pf3D7_11_v3	1037643	-	2049	0.553	0.014	1.091	3.744	2.087	0.0446	0.0446	-4.075	steryl ester hydrolase, putative	NA
1885	PF3D7_0725600	Pf3D7_07_v3	1083761	+	2087	-1.168	-2.308	-0.028	7.988	-2.101	0.0449	0.0449	-4.387	18S ribosomal RNA	NA
4167	PF3D7_1253800	Pf3D7_12_v3	2196157	+	966	3.93	0.096	7.763	1.665	2.105	0.0449	0.0449	-3.882	Plasmodium exported protein (PHISTa), unknown function	NA
4281	PF3D7_1309700	Pf3D7_13_v3	440265	+	5019	-0.458	-0.905	-0.011	5.967	-2.084	0.0449	0.0449	-4.257	vacuolar protein sorting-associated protein 18, putative	VPS18
4490	PF3D7_1330300	Pf3D7_13_v3	1276089	-	2285	0.379	0.009	0.75	4.512	2.082	0.0451	0.0451	-4.132	DnaJ protein, putative	NA
5415	PF3D7_1448500	Pf3D7_14_v3	1984189	-	11386	0.746	0.017	1.476	3.565	2.081	0.0452	0.0452	-4.046	conserved Plasmodium protein, unknown function	NA
5198	PF3D7_1427100	Pf3D7_14_v3	1056162	+	3963	-0.332	-0.656	-0.008	9.555	-2.081	0.0452	0.0452	-4.516	lipase, putative	NA
569	PF3D7_0312600	Pf3D7_03_v3	531213	+	77	-0.892	-1.763	-0.02	0.717	-2.081	0.0452	0.0452	-3.854	tRNA Valine	NA
1584	PF3D7_0628300	Pf3D7_06_v3	1170813	-	2884	0.869	0.019	1.719	6.948	2.088	0.0453	0.0453	-4.313	choline/ethanolaminephosphotransferase, putative	CEPT
4891	PF3D7_1370300	Pf3D7_13_v3	2787972	+	942	-0.51	-1.009	-0.011	10.421	-2.082	0.0454	0.0454	-4.579	membrane associated histidine-rich protein	MAHRP1
2685	PF3D7_0937400	Pf3D7_09_v3	1477526	+	1211	-1.275	-2.522	-0.027	-0.99	-2.078	0.0454	0.0454	-3.806	rifin	RIF
932	PF3D7_0423500	Pf3D7_04_v3	1058997	+	1555	0.77	0.016	1.524	1.862	2.078	0.0455	0.0455	-3.933	glideosome associated protein with multiple membrane spans 2	GAPM2
2876	PF3D7_1018000	Pf3D7_10_v3	718454	+	1683	-0.513	-1.015	-0.011	4.347	-2.078	0.0455	0.0455	-4.097	tRNA pseudouridine synthase, putative	NA
3766	PF3D7_1213900	Pf3D7_12_v3	595167	-	3610	-0.374	-0.74	-0.008	8.47	-2.076	0.0456	0.0456	-4.46	conserved Plasmodium protein, unknown function	NA
2401	PF3D7_0909400	Pf3D7_09_v3	424171	+	3936	-0.318	-0.63	-0.007	8.387	-2.076	0.0456	0.0456	-4.455	exoribonuclease, putative	NA
3759	PF3D7_1213200	Pf3D7_12_v3	577529	+	837	0.608	0.012	1.205	2.903	2.075	0.0458	0.0458	-4.007	conserved Plasmodium protein, unknown function	NA
1408	PF3D7_0611400	Pf3D7_06_v3	471658	-	2493	-0.483	-0.957	-0.009	6.033	-2.073	0.0459	0.0459	-4.275	SWIB/MDM2 domain-containing protein	SWIB
3791	PF3D7_1216400	Pf3D7_12_v3	653670	+	2766	-0.475	-0.94	-0.009	6.757	-2.071	0.0461	0.0461	-4.343	conserved Plasmodium membrane protein, unknown function	NA
1285	PF3D7_0532300	Pf3D7_05_v3	1308278	+	1663	0.68	0.011	1.348	9.618	2.077	0.0464	0.0464	-4.561	Plasmodium exported protein (PHISTb), unknown function	NA
5337	PF3D7_1440700	Pf3D7_14_v3	1660095	-	2202	0.562	0.009	1.115	3.497	2.065	0.0467	0.0467	-4.134	adaptor complexes medium subunit family	NA
1801	PF3D7_0717000	Pf3D7_07_v3	738578	+	2632	1.062	0.016	2.107	-1.056	2.066	0.0467	0.0467	-3.821	conserved Plasmodium membrane protein, unknown function	NA
4625	PF3D7_1343700	Pf3D7_13_v3	1724817	-	2181	-0.338	-0.672	-0.005	9.138	-2.064	0.0468	0.0468	-4.517	kelch protein K13	K13
2364	PF3D7_0905900	Pf3D7_09_v3	293585	-	3033	-0.432	-0.859	-0.006	7.658	-2.063	0.0469	0.0469	-4.428	coatomer subunit beta, putative	SEC27
1078	PF3D7_0512000	Pf3D7_05_v3	527639	+	1028	0.474	0.007	0.942	5.647	2.063	0.0469	0.0469	-4.299	prefoldin subunit 6, putative	NA
1237	PF3D7_0527700	Pf3D7_05_v3	1150234	+	73	-0.89	-1.768	-0.013	-1.938	-2.064	0.0469	0.0469	-3.802	tRNA Glutamic acid	NA
2180	PF3D7_0821600	Pf3D7_08_v3	969690	+	2025	-0.277	-0.55	-0.004	6.423	-2.062	0.047	0.047	-4.334	clp1-related protein, putative	NA
241	PF3D7_0203900	Pf3D7_02_v3	176567	+	1734	0.826	0.011	1.641	0.082	2.062	0.0471	0.0471	-3.884	5'-3' exonuclease, N-terminal resolvase-like domain, putative	NA
2645	PF3D7_0933400	Pf3D7_09_v3	1323893	+	807	0.903	0.012	1.793	-0.622	2.062	0.0471	0.0471	-3.846	conserved Plasmodium protein, unknown function	NA
861	PF3D7_0416400	Pf3D7_04_v3	718202	+	4453	0.557	0.008	1.107	5.194	2.061	0.0471	0.0471	-4.268	histone acetyltransferase, putative	HAT1
3828	PF3D7_1220000	Pf3D7_12_v3	798304	-	1308	-0.811	-1.612	-0.011	0.174	-2.061	0.0471	0.0471	-3.871	zinc finger protein, putative	NA
787	PF3D7_0409100	Pf3D7_04_v3	436217	-	1765	-0.347	-0.69	-0.005	8.874	-2.06	0.0472	0.0472	-4.507	U4/U6 small nuclear ribonucleoprotein PRP31, putative	PRPF31
4000	PF3D7_1237200	Pf3D7_12_v3	1550324	+	5748	-0.354	-0.705	-0.004	7.895	-2.058	0.0474	0.0474	-4.455	conserved Plasmodium protein, unknown function	NA
4959	PF3D7_1404000	Pf3D7_14_v3	143984	+	678	0.593	0.007	1.18	0.595	2.058	0.0475	0.0475	-3.931	DNA-directed RNA polymerase II subunit RPB4, putative	RPB4
2378	PF3D7_0907200	Pf3D7_09_v3	345892	+	3402	-0.341	-0.677	-0.004	8.457	-2.058	0.0475	0.0475	-4.49	GTPase-activating protein, putative	NA
470	PF3D7_0302800	Pf3D7_03_v3	148046	-	1260	-0.36	-0.716	-0.004	6.693	-2.057	0.0476	0.0476	-4.366	conserved Plasmodium protein, unknown function	NA
4491	PF3D7_1330400	Pf3D7_13_v3	1279800	-	1486	-0.249	-0.495	-0.003	6.931	-2.056	0.0476	0.0476	-4.389	ER lumen protein retaining receptor 1, putative, unspecified product	NA
4492	PF3D7_1330400	Pf3D7_13_v3	1279800	-	1486	-0.249	-0.495	-0.003	6.931	-2.056	0.0476	0.0476	-4.389	ER lumen protein retaining receptor 1, putative, unspecified product	NA
5623	PF3D7_1469100	Pf3D7_14_v3	2837319	+	783	-0.628	-1.249	-0.006	3.555	-2.054	0.0478	0.0478	-4.095	conserved Plasmodium protein, unknown function	NA
1259	PF3D7_0529800	Pf3D7_05_v3	1213533	+	5844	0.751	0.008	1.494	0.912	2.054	0.0478	0.0478	-3.921	conserved Plasmodium protein, unknown function	NA
3182	PF3D7_1107200	Pf3D7_11_v3	297823	+	2912	0.483	0.005	0.962	5.027	2.054	0.0479	0.0479	-4.256	conserved Plasmodium protein, unknown function	NA
4917	PF3D7_1373400	Pf3D7_13_v3	2881591	+	1366	-1.097	-2.184	-0.011	0.878	-2.053	0.0479	0.0479	-3.907	rifin	RIF
4488	PF3D7_1330100	Pf3D7_13_v3	1274448	+	561	0.53	0.005	1.055	2.73	2.053	0.048	0.048	-4.031	conserved Plasmodium protein, unknown function	NA
4092	PF3D7_1246400	Pf3D7_12_v3	1931970	+	615	0.724	0.007	1.442	3.911	2.052	0.0481	0.0481	-4.135	myosin A tail domain interacting protein	MTIP
5714	PF3D7_1478300	Pf3D7_14_v3	3221001	+	576	-0.98	-1.952	-0.009	-2.753	-2.052	0.0481	0.0481	-3.812	Plasmodium exported protein, unknown function, pseudogene	NA
4709	PF3D7_1352000	Pf3D7_13_v3	2069317	+	6021	0.465	0.004	0.926	3.225	2.049	0.0483	0.0483	-4.092	conserved Plasmodium protein, unknown function	NA
3035	PF3D7_1033600	Pf3D7_10_v3	1344150	-	2748	-0.298	-0.594	-0.002	8.566	-2.046	0.0487	0.0487	-4.523	myb2 transcription factor, putative	Myb2
3751	PF3D7_1212500	Pf3D7_12_v3	552102	-	1752	-0.39	-0.778	-0.002	7.694	-2.045	0.0488	0.0488	-4.473	glycerol-3-phosphate 1-O-acyltransferase	GAT
1004	PF3D7_0504600	Pf3D7_05_v3	177410	+	1146	0.929	0.005	1.853	0.02	2.044	0.0489	0.0489	-3.917	2-oxoisovalerate dehydrogenase subunit beta, mitochondrial, putative	BCKDHB
4376	PF3D7_1319100	Pf3D7_13_v3	789437	+	2412	-0.44	-0.878	-0.002	6.618	-2.044	0.0489	0.0489	-4.369	conserved protein, unknown function	NA
3330	PF3D7_1121700	Pf3D7_11_v3	820073	+	2448	-0.367	-0.733	-0.002	7.075	-2.044	0.0489	0.0489	-4.428	protein GCN20	GCN20
3805	PF3D7_1217700	Pf3D7_12_v3	696895	-	1563	-0.283	-0.566	-0.001	7.124	-2.042	0.0491	0.0491	-4.429	conserved Plasmodium protein, unknown function	NA
3958	PF3D7_1233000	Pf3D7_12_v3	1355317	-	2412	-0.601	-1.2	-0.002	2.787	-2.042	0.0491	0.0491	-4.048	elongation factor G	EF-G
998	PF3D7_0504000	Pf3D7_05_v3	157625	+	7344	0.508	0.002	1.014	4.045	2.041	0.0492	0.0492	-4.198	cation transporting P-ATPase	ATPase3
2671	PF3D7_0936000	Pf3D7_09_v3	1427642	-	381	-0.312	-0.622	-0.001	10.12	-2.041	0.0492	0.0492	-4.627	ring-exported protein 2	REX2
2925	PF3D7_1022800	Pf3D7_10_v3	955883	+	2475	-0.856	-1.709	-0.003	-0.854	-2.041	0.0493	0.0493	-3.882	4-hydroxy-3-methylbut-2-en-1-yl diphosphate synthase	GcpE
3219	PF3D7_1110900	Pf3D7_11_v3	431906	-	1740	0.379	0.001	0.756	6.984	2.039	0.0494	0.0494	-4.412	ES2 protein, putative	NA
1446	PF3D7_0615000	Pf3D7_06_v3	622272	+	441	-0.46	-0.919	-0.001	5.487	-2.039	0.0495	0.0495	-4.284	conserved Plasmodium protein, unknown function	NA
460	PF3D7_0301800	Pf3D7_03_v3	104325	+	957	0.788	0.001	1.574	7.931	2.044	0.0497	0.0497	-4.451	Plasmodium exported protein, unknown function	NA
2818	PF3D7_1012600	Pf3D7_10_v3	482527	-	1668	-0.272	-0.543	0	9.157	-2.035	0.0499	0.0499	-4.573	GMP synthase [glutamine-hydrolyzing]	GMPS
3434	PF3D7_1131900	Pf3D7_11_v3	1234061	-	2331	-0.919	-1.838	0.001	-0.573	-2.031	0.0503	0.0503	-3.911	conserved Plasmodium protein, unknown function	NA
5596	PF3D7_1466400	Pf3D7_14_v3	2714844	-	2442	-0.397	-0.795	0.001	8.648	-2.029	0.0504	0.0504	-4.562	transcription factor with AP2 domain(s)	ApiAP2
4519	PF3D7_1333100	Pf3D7_13_v3	1357704	-	2616	-0.906	-1.815	0.004	-0.187	-2.025	0.0509	0.0509	-3.912	conserved Plasmodium protein, unknown function	NA
158	PF3D7_0111500	Pf3D7_01_v3	439652	-	1767	0.585	-0.002	1.172	1.304	2.025	0.0509	0.0509	-4.014	UMP-CMP kinase, putative	NA
3226	PF3D7_1111600	Pf3D7_11_v3	448912	+	2787	-0.578	-1.16	0.003	2.401	-2.024	0.0511	0.0511	-4.066	endonuclease/exonuclease/phosphatase family protein, putative	NA
4654	PF3D7_1346600	Pf3D7_13_v3	1874060	-	666	0.942	-0.005	1.89	-0.191	2.022	0.0512	0.0512	-3.918	conserved Plasmodium protein, unknown function	NA
4087	PF3D7_1245900	Pf3D7_12_v3	1910963	+	936	-0.353	-0.707	0.002	5.267	-2.021	0.0514	0.0514	-4.311	conserved Plasmodium protein, unknown function	NA
1287	PF3D7_0532500	Pf3D7_05_v3	1316342	+	505	0.966	-0.006	1.938	-0.492	2.021	0.0514	0.0514	-3.931	Plasmodium exported protein, unknown function	NA
5126	PF3D7_1420000	Pf3D7_14_v3	828904	-	1870	-0.456	-0.915	0.004	8.394	-2.018	0.0517	0.0517	-4.566	splicing factor 3B subunit 4, putative	SF3B4
5307	PF3D7_1437700	Pf3D7_14_v3	1525564	-	2922	-0.57	-1.145	0.004	1.184	-2.018	0.0517	0.0517	-3.995	succinyl-CoA ligase, putative	NA
349	PF3D7_0214400	Pf3D7_02_v3	586765	-	2287	-0.265	-0.533	0.002	9.074	-2.017	0.0518	0.0518	-4.602	conserved Plasmodium protein, unknown function	NA
1279	PF3D7_0531700	Pf3D7_05_v3	1291693	+	359	-1.851	-3.718	0.016	-1.467	-2.024	0.0518	0.0518	-3.888	unspecified product	NA
3457	PF3D7_1134200	Pf3D7_11_v3	1326747	+	5418	-0.327	-0.658	0.003	7.842	-2.015	0.052	0.052	-4.533	conserved Plasmodium protein, unknown function	NA
1024	PF3D7_0506600	Pf3D7_05_v3	278774	-	722	0.766	-0.007	1.54	0.957	2.014	0.0521	0.0521	-3.99	histone deacetylase, putative, pseudogene	NA
4932	PF3D7_1401300	Pf3D7_14_v3	48912	-	1504	-0.997	-2.003	0.01	3.246	-2.018	0.0521	0.0521	-4.166	proline aminopeptidase	PAP
4597	PF3D7_1340900	Pf3D7_13_v3	1627311	+	2170	-0.401	-0.805	0.004	7.992	-2.013	0.0522	0.0522	-4.553	sodium-dependent phosphate transporter	PiT
1421	PF3D7_0612700	Pf3D7_06_v3	525987	-	1044	0.428	-0.005	0.86	3.09	2.01	0.0525	0.0525	-4.127	6-cysteine protein	P12
2624	PF3D7_0931300	Pf3D7_09_v3	1261027	+	918	-1.191	-2.396	0.014	2.808	-2.018	0.0525	0.0525	-4.143	asparagine-rich antigen, putative	NA
4395	PF3D7_1321000	Pf3D7_13_v3	859299	+	2049	-0.796	-1.601	0.01	-0.504	-2.009	0.0527	0.0527	-3.93	conserved Plasmodium protein, unknown function	NA
2870	PF3D7_1017400	Pf3D7_10_v3	697970	-	1854	0.589	-0.008	1.186	8.21	2.011	0.0528	0.0528	-4.584	phosphomannomutase, putative	PMM
616	PF3D7_0317000	Pf3D7_03_v3	682795	-	891	0.395	-0.005	0.795	7.261	2.006	0.053	0.053	-4.52	proteasome subunit alpha type-3, putative	NA
4446	PF3D7_1326000	Pf3D7_13_v3	1085786	-	1076	0.681	-0.01	1.372	0.84	2.003	0.0533	0.0533	-4.001	conserved Plasmodium protein, unknown function	NA
1630	PF3D7_0700100	Pf3D7_07_v3	20307	+	7777	-0.667	-1.344	0.01	5.547	-2.005	0.0533	0.0533	-4.366	erythrocyte membrane protein 1, PfEMP1	VAR
3365	PF3D7_1125200	Pf3D7_11_v3	989159	-	1143	0.442	-0.007	0.891	4.366	2.002	0.0534	0.0534	-4.281	conserved Plasmodium protein, unknown function	NA
2598	PF3D7_0928800	Pf3D7_09_v3	1156247	+	2463	1.037	-0.017	2.09	-0.43	2.001	0.0535	0.0535	-3.957	serine/threonine protein kinase, putative	NA
5292	PF3D7_1436200	Pf3D7_14_v3	1467629	-	6810	-0.625	-1.26	0.01	1.754	-2	0.0537	0.0537	-4.062	conserved Plasmodium protein, unknown function	NA
1157	PF3D7_0519800	Pf3D7_05_v3	820719	-	2190	-0.451	-0.909	0.008	7.976	-1.999	0.0537	0.0537	-4.575	EELM2 domain-containing protein, putative	NA
2149	PF3D7_0818500	Pf3D7_08_v3	842317	+	899	-0.31	-0.625	0.005	8.616	-2	0.0537	0.0537	-4.612	zinc finger protein, putative	NA
4897	PF3D7_1371300	Pf3D7_13_v3	2802945	+	4215	-2.137	-4.311	0.038	2.753	-2.014	0.0539	0.0539	-4.096	28S ribosomal RNA	NA
992	PF3D7_0503300	Pf3D7_05_v3	135004	-	927	-0.339	-0.685	0.006	8.378	-1.998	0.0539	0.0539	-4.6	serine/arginine-rich splicing factor 12	SRSF12
3576	PF3D7_1145600	Pf3D7_11_v3	1810290	-	2153	0.736	-0.013	1.485	0.032	1.998	0.054	0.054	-3.967	conserved protein, unknown function	NA
1967	PF3D7_0800600	Pf3D7_08_v3	61138	-	998	-1.087	-2.193	0.02	-3.267	-1.997	0.054	0.054	-3.89	Plasmodium exported protein (PHISTa), unknown function	NA
3341	PF3D7_1122800	Pf3D7_11_v3	872031	+	5648	-0.364	-0.734	0.007	6.426	-1.996	0.0541	0.0541	-4.47	calcium-dependent protein kinase 6	CDPK6
2417	PF3D7_0911000	Pf3D7_09_v3	500183	+	2551	1.067	-0.02	2.154	-1.833	1.997	0.0541	0.0541	-3.913	phosphatidylinositol N-acetylglucosaminyltransferase, putative	NA
1556	PF3D7_0625600	Pf3D7_06_v3	1039655	+	1896	-0.846	-1.708	0.016	3.746	-1.997	0.0541	0.0541	-4.195	poly(A) polymerase PAP, putative	NA
4270	PF3D7_1308700	Pf3D7_13_v3	401577	+	1824	1.035	-0.02	2.09	0.418	1.994	0.0543	0.0543	-4.012	conserved Plasmodium protein, unknown function	NA
2962	PF3D7_1026500	Pf3D7_10_v3	1112423	-	213	1.15	-0.022	2.323	-2.512	1.995	0.0543	0.0543	-3.902	conserved Plasmodium protein, unknown function	NA
4043	PF3D7_1241500	Pf3D7_12_v3	1771996	-	1263	0.711	-0.014	1.436	4.098	1.994	0.0544	0.0544	-4.315	conserved Plasmodium protein, unknown function	NA
1707	PF3D7_0707700	Pf3D7_07_v3	357700	+	2886	-0.236	-0.476	0.005	8.27	-1.993	0.0544	0.0544	-4.607	E3 ubiquitin-protein ligase, putative	NA
4272	PF3D7_1308900	Pf3D7_13_v3	408580	-	3522	-0.408	-0.825	0.008	8.049	-1.994	0.0544	0.0544	-4.602	mRNA-decapping enzyme 2, putative	DCP2
3579	PF3D7_1145900	Pf3D7_11_v3	1818594	+	2150	0.539	-0.011	1.09	1.507	1.992	0.0545	0.0545	-4.052	conserved Plasmodium protein, unknown function	NA
229	PF3D7_0202700	Pf3D7_02_v3	135523	+	1617	0.733	-0.015	1.481	0.819	1.992	0.0545	0.0545	-4.026	octaprenyl pyrophosphate synthase	OPP
5059	PF3D7_1413400	Pf3D7_14_v3	534057	-	1932	0.86	-0.018	1.738	-1.221	1.992	0.0546	0.0546	-3.942	30S ribosomal protein S9, putative	NA
3118	PF3D7_1100800	Pf3D7_11_v3	59550	+	779	1.347	-0.029	2.723	-2.839	1.991	0.0547	0.0547	-3.903	Pfmc-2TM Maurer's cleft two transmembrane protein	MC-2TM
3684	PF3D7_1205900	Pf3D7_12_v3	264615	-	3249	-0.362	-0.733	0.009	7.979	-1.986	0.0552	0.0552	-4.598	conserved protein, unknown function	NA
1978	PF3D7_0801500	Pf3D7_08_v3	106593	-	1650	-0.295	-0.596	0.007	7.544	-1.987	0.0552	0.0552	-4.558	nucleolar protein 10, putative	NOL10
1248	PF3D7_0528800	Pf3D7_05_v3	1180425	-	1614	-0.347	-0.702	0.008	6.76	-1.986	0.0553	0.0553	-4.503	nucleolar preribosomal GTPase, putative	NA
5468	PF3D7_1453800	Pf3D7_14_v3	2209792	-	2733	-0.269	-0.545	0.007	8.729	-1.985	0.0554	0.0554	-4.641	glucose-6-phosphate dehydrogenase-6-phosphogluconolactonase	GluPho
3315	PF3D7_1120200	Pf3D7_11_v3	765033	+	593	-0.37	-0.749	0.009	4.62	-1.984	0.0555	0.0555	-4.304	conserved Plasmodium protein, unknown function	NA
5715	PF3D7_1478400	Pf3D7_14_v3	3223288	-	1345	-0.952	-1.929	0.024	-2.241	-1.983	0.0557	0.0557	-3.931	Plasmodium exported protein, unknown function, pseudogene	NA
4308	PF3D7_1312400	Pf3D7_13_v3	521050	+	3387	0.929	-0.024	1.882	-1.828	1.982	0.0558	0.0558	-3.941	translation initiation factor IF-2, putative	IF2a
2483	PF3D7_0917600	Pf3D7_09_v3	729674	-	2463	-0.297	-0.601	0.008	8.321	-1.981	0.0559	0.0559	-4.622	pre-mRNA-splicing factor ATP-dependent RNA helicase PRP43, putative	PRP43
3987	PF3D7_1235900	Pf3D7_12_v3	1497687	-	3725	-0.342	-0.693	0.009	8.288	-1.98	0.0559	0.0559	-4.624	pre-mRNA-splicing factor SYF1, putative	XAB2
4366	PF3D7_1318100	Pf3D7_13_v3	748387	-	585	0.665	-0.018	1.347	0.474	1.98	0.056	0.056	-4.014	ferredoxin, putative	NA
2295	PF3D7_0832800	Pf3D7_08_v3	1411058	+	1084	-1.255	-2.544	0.034	-3.803	-1.979	0.0561	0.0561	-3.908	rifin	RIF
778	PF3D7_0408300	Pf3D7_04_v3	403626	-	1741	-0.449	-0.91	0.013	5.775	-1.978	0.0562	0.0562	-4.457	zinc finger Ran-binding domain-containing protein 2, putative	ZRANB2
1278	PF3D7_0531600	Pf3D7_05_v3	1289601	+	2092	-1.065	-2.16	0.031	10.328	-1.994	0.0563	0.0563	-4.723	18S ribosomal RNA	NA
5545	PF3D7_1461300	Pf3D7_14_v3	2492166	+	204	-0.274	-0.555	0.008	6.779	-1.977	0.0563	0.0563	-4.526	40S ribosomal protein S28e, putative	NA
2438	PF3D7_0913100	Pf3D7_09_v3	571031	-	2319	-0.795	-1.613	0.023	1.248	-1.977	0.0563	0.0563	-4.065	conserved Plasmodium protein, unknown function	NA
5295	PF3D7_1436500	Pf3D7_14_v3	1488706	+	1296	0.593	-0.017	1.202	0.968	1.978	0.0563	0.0563	-4.045	GTP-binding protein, putative	NA
449	PF3D7_0300700	Pf3D7_03_v3	61445	+	1270	-1.361	-2.762	0.039	2.368	-1.984	0.0563	0.0563	-4.114	rifin	RIF
1044	PF3D7_0508600	Pf3D7_05_v3	356222	+	789	-0.448	-0.91	0.013	5.961	-1.976	0.0565	0.0565	-4.448	conserved Plasmodium protein, unknown function	NA
607	PF3D7_0316200	Pf3D7_03_v3	649849	-	7399	1.077	-0.032	2.186	0.771	1.977	0.0565	0.0565	-4.079	conserved Plasmodium protein, unknown function	NA
5024	PF3D7_1410200	Pf3D7_14_v3	400418	+	2577	-0.24	-0.487	0.007	9.481	-1.975	0.0565	0.0565	-4.707	cytidine triphosphate synthetase	NA
2355	PF3D7_0905200	Pf3D7_09_v3	245261	-	3600	-0.375	-0.762	0.011	7.224	-1.975	0.0566	0.0566	-4.554	mitochondrial carrier protein, putative	NA
3288	PF3D7_1117600	Pf3D7_11_v3	668368	+	1124	0.579	-0.017	1.176	1.701	1.974	0.0567	0.0567	-4.091	peptidyl-tRNA hydrolase ICT1, peptidyl-tRNA hydrolase ICT1, putative	ICT1
3289	PF3D7_1117600	Pf3D7_11_v3	668368	+	1124	0.579	-0.017	1.176	1.701	1.974	0.0567	0.0567	-4.091	peptidyl-tRNA hydrolase ICT1, peptidyl-tRNA hydrolase ICT1, putative	ICT1
736	PF3D7_0404000	Pf3D7_04_v3	223711	-	421	0.824	-0.026	1.673	-1.341	1.971	0.057	0.057	-3.973	conserved Plasmodium protein, unknown function	NA
1923	PF3D7_0729300	Pf3D7_07_v3	1248837	-	2667	-0.313	-0.635	0.01	8.474	-1.97	0.0571	0.0571	-4.65	60S ribosomal export protein NMD3, putative	NMD3
1542	PF3D7_0624300	Pf3D7_06_v3	987808	+	1829	0.656	-0.021	1.332	-0.287	1.969	0.0573	0.0573	-3.998	CPW-WPC family protein	NA
376	PF3D7_0217000	Pf3D7_02_v3	703090	-	3498	0.704	-0.023	1.431	0.033	1.968	0.0574	0.0574	-4.017	conserved Plasmodium membrane protein, unknown function	NA
4642	PF3D7_1345400	Pf3D7_13_v3	1816344	-	4957	0.838	-0.028	1.703	2.13	1.968	0.0574	0.0574	-4.153	conserved Plasmodium protein, unknown function	NA
309	PF3D7_0210400	Pf3D7_02_v3	425689	+	809	1.075	-0.036	2.186	-1.585	1.967	0.0575	0.0575	-3.976	50S ribosomal protein L33, putative	NA
3303	PF3D7_1119000	Pf3D7_11_v3	718650	-	1116	0.405	-0.014	0.823	4.058	1.967	0.0575	0.0575	-4.311	acyl-CoA-binding protein, putative	NA
4260	PF3D7_1307700	Pf3D7_13_v3	344525	+	3708	-0.329	-0.669	0.011	6.449	-1.967	0.0575	0.0575	-4.519	conserved Plasmodium protein, unknown function	NA
1484	PF3D7_0618800	Pf3D7_06_v3	779849	-	3448	0.802	-0.028	1.632	-1.222	1.965	0.0577	0.0577	-3.975	conserved Plasmodium protein, unknown function	NA
3960	PF3D7_1233200	Pf3D7_12_v3	1360631	-	10007	1.057	-0.037	2.151	0.729	1.966	0.0577	0.0577	-4.053	conserved Plasmodium protein, unknown function	NA
3961	PF3D7_1233200	Pf3D7_12_v3	1360631	-	10007	1.057	-0.037	2.151	0.729	1.966	0.0577	0.0577	-4.053	conserved Plasmodium protein, unknown function	NA
4307	PF3D7_1312300	Pf3D7_13_v3	519599	-	843	0.826	-0.029	1.682	-2.798	1.964	0.0579	0.0579	-3.948	mitochondrial ribosomal protein S35 precursor, putative	NA
3968	PF3D7_1234000	Pf3D7_12_v3	1411607	-	1498	0.583	-0.021	1.187	2.071	1.962	0.0581	0.0581	-4.162	conserved Plasmodium protein, unknown function	NA
3618	PF3D7_1149700	Pf3D7_11_v3	2004754	+	258	2.14	-0.078	4.359	-1.677	1.972	0.0581	0.0581	-3.959	Plasmodium exported protein (PHISTa), unknown function	NA
2746	PF3D7_1005500	Pf3D7_10_v3	237506	-	4740	0.432	-0.016	0.879	6.16	1.962	0.0581	0.0581	-4.522	regulator of nonsense transcripts 1, putative	UPF1
5195	PF3D7_1426800	Pf3D7_14_v3	1043057	+	6534	-0.289	-0.588	0.011	8.048	-1.962	0.0582	0.0582	-4.64	conserved Plasmodium protein, unknown function	NA
3287	PF3D7_1117500	Pf3D7_11_v3	666037	-	1686	0.689	-0.026	1.403	2.579	1.961	0.0583	0.0583	-4.176	tyrosine--tRNA ligase	TyrRSapi
1119	PF3D7_0516000	Pf3D7_05_v3	663551	+	3367	0.816	-0.032	1.663	3.543	1.96	0.0587	0.0587	-4.333	RAP protein, putative	NA
3218	PF3D7_1110800	Pf3D7_11_v3	430157	-	1320	1.038	-0.041	2.117	-0.792	1.955	0.0589	0.0589	-4.001	conserved Plasmodium protein, unknown function	NA
2580	PF3D7_0927100	Pf3D7_09_v3	1100253	-	579	0.912	-0.037	1.86	-1.965	1.955	0.059	0.059	-3.973	conserved Plasmodium protein, unknown function	NA
5532	PF3D7_1460100	Pf3D7_14_v3	2454902	+	978	-0.515	-1.051	0.021	4.193	-1.955	0.059	0.059	-4.296	FYVE and coiled-coil domain-containing protein	FCP
3756	PF3D7_1212900	Pf3D7_12_v3	568569	-	3267	-0.393	-0.801	0.016	8.046	-1.954	0.0591	0.0591	-4.649	bromodomain protein 2, putative	BDP2
3571	PF3D7_1145100	Pf3D7_11_v3	1783357	-	3207	-0.414	-0.846	0.017	7.44	-1.952	0.0593	0.0593	-4.619	coatomer subunit gamma, putative	SEC21
1694	PF3D7_0706500	Pf3D7_07_v3	309902	-	5121	-0.253	-0.518	0.011	10.678	-1.949	0.0597	0.0597	-4.816	conserved Plasmodium protein, unknown function	NA
4024	PF3D7_1239600	Pf3D7_12_v3	1652936	-	909	0.623	-0.027	1.273	0.343	1.949	0.0597	0.0597	-4.101	hydroxyethylthiazole kinase	ThzK
4352	PF3D7_1316700	Pf3D7_13_v3	695732	+	2254	-0.458	-0.937	0.02	3.377	-1.947	0.0599	0.0599	-4.263	conserved Plasmodium protein, unknown function	NA
3877	PF3D7_1225000	Pf3D7_12_v3	1012310	-	5539	0.775	-0.034	1.583	0.146	1.948	0.0599	0.0599	-4.077	conserved Plasmodium protein, unknown function	NA
5050	PF3D7_1412600	Pf3D7_14_v3	509686	-	1491	-0.419	-0.857	0.019	5.992	-1.947	0.0599	0.0599	-4.506	deoxyhypusine synthase	DHS
676	PF3D7_0323000	Pf3D7_03_v3	968675	-	528	0.53	-0.023	1.083	4.104	1.947	0.0599	0.0599	-4.377	translation machinery-associated protein 7, putative	TMA7
3955	PF3D7_1232700	Pf3D7_12_v3	1346052	+	4461	0.737	-0.033	1.507	-0.989	1.946	0.0601	0.0601	-4.015	conserved Plasmodium protein, unknown function	NA
4462	PF3D7_1327600	Pf3D7_13_v3	1159366	+	615	-0.623	-1.273	0.028	2.736	-1.945	0.0602	0.0602	-4.204	nicotinate-nucleotide adenylyltransferase	NMNAT
2056	PF3D7_0809300	Pf3D7_08_v3	474253	-	1033	1.383	-0.064	2.83	-1.885	1.946	0.0603	0.0603	-4.001	unspecified product	NA
369	PF3D7_0216400	Pf3D7_02_v3	675431	+	2169	0.712	-0.033	1.456	0.971	1.944	0.0603	0.0603	-4.102	vacuolar protein sorting-associated protein 45, putative	VPS45
4862	PF3D7_1367400	Pf3D7_13_v3	2687561	+	3141	-0.333	-0.682	0.015	7.671	-1.944	0.0604	0.0604	-4.642	conserved Plasmodium protein, unknown function	NA
1986	PF3D7_0802300	Pf3D7_08_v3	167069	-	3366	-0.274	-0.561	0.013	8.051	-1.942	0.0606	0.0606	-4.681	periodic tryptophan protein 2, putative	PWP2
2175	PF3D7_0821100	Pf3D7_08_v3	953448	+	2867	-0.265	-0.543	0.013	8.996	-1.942	0.0606	0.0606	-4.728	protein kinase 1	PK1
2234	PF3D7_0827000	Pf3D7_08_v3	1167579	-	3870	-0.304	-0.624	0.015	9.273	-1.94	0.0608	0.0608	-4.756	ATP-dependent RNA helicase DBP10, putative	DBP10
765	PF3D7_0407000	Pf3D7_04_v3	360547	-	1218	-0.427	-0.874	0.02	5.538	-1.941	0.0608	0.0608	-4.451	conserved Plasmodium protein, unknown function	NA
395	PF3D7_0218900	Pf3D7_02_v3	767584	-	160	0.795	-0.038	1.629	-0.276	1.94	0.0609	0.0609	-4.036	Plasmodium RNA of unknown function RUF2	NA
4364	PF3D7_1317900	Pf3D7_13_v3	741926	-	2925	-0.308	-0.631	0.015	7.703	-1.939	0.0609	0.0609	-4.654	small ribosomal subunit nuclear export protein, putative	NA
2829	PF3D7_1013700	Pf3D7_10_v3	540622	+	1073	0.903	-0.044	1.849	-0.267	1.939	0.061	0.061	-4.06	conserved Plasmodium protein, unknown function	NA
4975	PF3D7_1405400	Pf3D7_14_v3	185437	-	4932	0.55	-0.027	1.126	2.71	1.939	0.061	0.061	-4.224	DNA mismatch repair protein, putative	MutS
3047	PF3D7_1034800	Pf3D7_10_v3	1380028	+	2222	0.887	-0.044	1.818	0.501	1.938	0.0611	0.0611	-4.079	conserved Plasmodium protein, unknown function	NA
1806	PF3D7_0717500	Pf3D7_07_v3	755763	+	1934	0.381	-0.019	0.78	6.864	1.936	0.0613	0.0613	-4.615	calcium-dependent protein kinase 4	CDPK4
5454	PF3D7_1452400	Pf3D7_14_v3	2148421	+	2703	-0.298	-0.611	0.015	7.673	-1.935	0.0615	0.0615	-4.671	conserved Plasmodium protein, unknown function	NA
988	PF3D7_0502900	Pf3D7_05_v3	123332	-	573	0.668	-0.034	1.371	2.214	1.935	0.0615	0.0615	-4.219	mitochondrial inner membrane TIM10 associated protein, putative	NA
5569	PF3D7_1463700	Pf3D7_14_v3	2581543	+	981	-0.373	-0.766	0.019	4.677	-1.934	0.0616	0.0616	-4.403	cyclin homologue	CYC1
3366	PF3D7_1125300	Pf3D7_11_v3	991863	+	4596	0.477	-0.024	0.978	5.476	1.934	0.0616	0.0616	-4.518	DNA-directed RNA polymerase	mtRNAP
5265	PF3D7_1433600	Pf3D7_14_v3	1341689	+	601	0.71	-0.036	1.456	2.41	1.934	0.0616	0.0616	-4.207	signal peptidase complex subunit SPC1, putative	SPC1
4021	PF3D7_1239300	Pf3D7_12_v3	1645219	+	618	-0.4	-0.821	0.021	4.195	-1.933	0.0617	0.0617	-4.344	conserved Plasmodium protein, unknown function	NA
357	PF3D7_0215200	Pf3D7_02_v3	626976	+	735	0.692	-0.036	1.42	2.977	1.933	0.0617	0.0617	-4.245	conserved Plasmodium protein, unknown function	NA
5155	PF3D7_1422800	Pf3D7_14_v3	918429	-	1569	-0.534	-1.096	0.028	5.145	-1.932	0.0618	0.0618	-4.454	actin-related protein, putative	ARP4a
1236	PF3D7_0527600	Pf3D7_05_v3	1145857	-	2954	0.555	-0.029	1.139	5.052	1.932	0.0618	0.0618	-4.44	conserved Plasmodium protein, unknown function	NA
4611	PF3D7_1342300	Pf3D7_13_v3	1664854	+	792	0.82	-0.043	1.683	-0.549	1.933	0.0618	0.0618	-4.062	tetratricopeptide repeat protein, putative	NA
1070	PF3D7_0511200	Pf3D7_05_v3	471055	+	3004	-0.525	-1.078	0.028	3.098	-1.931	0.062	0.062	-4.29	stearoyl-CoA desaturase	SCD
1466	PF3D7_0617000	Pf3D7_06_v3	704035	-	1134	-0.414	-0.85	0.022	5.291	-1.929	0.0622	0.0622	-4.476	mitochondrial import receptor subunit TOM40, putative	TOM40
2542	PF3D7_0923400	Pf3D7_09_v3	950408	+	3315	-0.628	-1.291	0.034	6.866	-1.932	0.0623	0.0623	-4.619	conserved Plasmodium protein, unknown function	NA
756	PF3D7_0406000	Pf3D7_04_v3	321019	+	1527	-0.417	-0.856	0.023	5.738	-1.928	0.0624	0.0624	-4.523	conserved Plasmodium protein, unknown function	NA
1026	PF3D7_0506800	Pf3D7_05_v3	284691	+	3333	-0.303	-0.622	0.017	7.58	-1.927	0.0625	0.0625	-4.681	transcription factor 25, putative	TCF25
3504	PF3D7_1138500	Pf3D7_11_v3	1518464	+	2775	-0.256	-0.527	0.014	8.818	-1.926	0.0626	0.0626	-4.75	protein phosphatase 2C	PPM2
3346	PF3D7_1123300	Pf3D7_11_v3	921823	+	2070	-0.302	-0.621	0.017	6.384	-1.927	0.0626	0.0626	-4.578	RING zinc finger protein, putative	NA
3536	PF3D7_1141600	Pf3D7_11_v3	1668302	-	780	0.926	-0.052	1.905	-1.225	1.925	0.0628	0.0628	-4.041	dolichol-phosphate mannosyltransferase	DPM1
2719	PF3D7_1002800	Pf3D7_10_v3	132995	+	4278	0.587	-0.034	1.208	2.155	1.923	0.063	0.063	-4.219	DnaJ protein, putative	NA
5680	PF3D7_1474900	Pf3D7_14_v3	3072261	+	987	0.841	-0.049	1.73	-0.271	1.922	0.0632	0.0632	-4.089	trailer hitch homolog, putative	CITH
3676	PF3D7_1205100	Pf3D7_12_v3	222695	-	2297	0.7	-0.041	1.441	4.576	1.922	0.0633	0.0633	-4.428	O-phosphoseryl-tRNA(Sec) selenium transferase, putative	SEPSECS
5451	PF3D7_1452100	Pf3D7_14_v3	2141662	+	1017	-0.514	-1.058	0.031	3.078	-1.919	0.0635	0.0635	-4.265	leucine-rich repeat protein	LRR3
963	PF3D7_0500500	Pf3D7_05_v3	36464	-	1101	-1.318	-2.718	0.081	-3.247	-1.916	0.0639	0.0639	-4.009	rifin	RIF
4763	PF3D7_1357500	Pf3D7_13_v3	2281492	+	2721	0.47	-0.029	0.968	3.936	1.915	0.064	0.064	-4.356	DNA helicase, putative	NA
113	PF3D7_0107000	Pf3D7_01_v3	293642	+	1327	0.848	-0.053	1.749	-1.072	1.914	0.0642	0.0642	-4.055	centrin-1	CEN1
2352	PF3D7_0904900	Pf3D7_09_v3	224875	-	7957	0.581	-0.036	1.197	3.247	1.914	0.0642	0.0642	-4.314	copper-transporting ATPase	CuTP
3489	PF3D7_1137000	Pf3D7_11_v3	1461301	-	198	-0.821	-1.693	0.052	3.807	-1.915	0.0643	0.0643	-4.344	U2 spliceosomal RNA	NA
3106	PF3D7_1040900	Pf3D7_10_v3	1628914	+	1110	-1.108	-2.287	0.071	-2.431	-1.911	0.0646	0.0646	-4.029	rifin	RIF
5579	PF3D7_1464700	Pf3D7_14_v3	2625452	-	1149	-0.301	-0.622	0.019	6.638	-1.91	0.0647	0.0647	-4.632	ATP synthase (C/AC39) subunit, putative	NA
4072	PF3D7_1244400	Pf3D7_12_v3	1859656	+	4191	-0.528	-1.091	0.034	5.723	-1.91	0.0647	0.0647	-4.531	RNA-binding protein, putative	NA
2375	PF3D7_0906910	Pf3D7_09_v3	335982	+	789	-0.466	-0.962	0.03	6.071	-1.91	0.0647	0.0647	-4.599	tubulin-specific chaperone, putative	NA
1539	PF3D7_0624000	Pf3D7_06_v3	981066	+	1482	-0.257	-0.531	0.017	9.209	-1.909	0.0648	0.0648	-4.811	hexokinase	HK
5074	PF3D7_1414900	Pf3D7_14_v3	601981	-	3579	0.58	-0.038	1.199	3.441	1.908	0.065	0.065	-4.338	ATP-dependent protease, putative	NA
1692	PF3D7_0706300	Pf3D7_07_v3	305563	+	470	0.435	-0.029	0.898	5.826	1.908	0.065	0.065	-4.557	conserved Plasmodium protein, unknown function	NA
2131	PF3D7_0816700	Pf3D7_08_v3	767110	+	771	0.659	-0.043	1.361	2.783	1.908	0.0651	0.0651	-4.319	trafficking protein particle complex subunit 2-like protein, putative	TRAPPC2L
313	PF3D7_0210800	Pf3D7_02_v3	437755	-	1248	-0.525	-1.086	0.035	6.356	-1.906	0.0653	0.0653	-4.597	conserved Plasmodium protein, unknown function	NA
2561	PF3D7_0925200	Pf3D7_09_v3	1017435	+	1484	-0.375	-0.775	0.025	8.106	-1.905	0.0654	0.0654	-4.745	ribosomal RNA-processing protein 8, putative	RRP8
3523	PF3D7_1140300	Pf3D7_11_v3	1605321	+	1086	1.148	-0.078	2.374	-2.33	1.905	0.0655	0.0655	-4.049	P-loop containing nucleoside triphosphate hydrolase, putative	NA
3934	PF3D7_1230600	Pf3D7_12_v3	1256690	+	1415	0.337	-0.023	0.698	5.467	1.904	0.0655	0.0655	-4.517	sun-family protein, putative	NA
889	PF3D7_0419200	Pf3D7_04_v3	854879	+	411	-0.482	-0.998	0.034	2.148	-1.901	0.0659	0.0659	-4.228	protein transport protein GOT1, putative	GOT1
895	PF3D7_0419800	Pf3D7_04_v3	874811	-	711	-0.302	-0.625	0.021	7.274	-1.9	0.0661	0.0661	-4.698	60S ribosomal protein L7ae/L30e, putative	NA
4392	PF3D7_1320700	Pf3D7_13_v3	849662	+	4329	-0.7	-1.449	0.05	1.357	-1.899	0.0662	0.0662	-4.195	conserved Plasmodium protein, unknown function	NA
1660	PF3D7_0703100	Pf3D7_07_v3	121414	+	543	-0.468	-0.968	0.033	3.152	-1.899	0.0662	0.0662	-4.301	conserved Plasmodium protein, unknown function	NA
414	PF3D7_0220700	Pf3D7_02_v3	833805	+	884	-0.391	-0.809	0.028	6.072	-1.899	0.0662	0.0662	-4.576	Plasmodium exported protein (hyp9), unknown function	NA
2316	PF3D7_0901400	Pf3D7_09_v3	70521	+	1218	2.5	-0.179	5.179	-2.065	1.911	0.0662	0.0662	-4.049	rifin	RIF
2449	PF3D7_0914200	Pf3D7_09_v3	608361	-	1715	-0.343	-0.71	0.024	6.438	-1.898	0.0663	0.0663	-4.61	phospholipid or glycerol acyltransferase, putative	NA
454	PF3D7_0301200	Pf3D7_03_v3	78195	-	2199	0.547	-0.039	1.133	5.92	1.898	0.0663	0.0663	-4.542	serine/threonine protein kinase, FIKK family	FIKK3
4672	PF3D7_1348400	Pf3D7_13_v3	1935596	-	11785	0.597	-0.043	1.236	3.323	1.898	0.0664	0.0664	-4.375	conserved Plasmodium membrane protein, unknown function	NA
4559	PF3D7_1337100	Pf3D7_13_v3	1495259	+	1982	0.655	-0.047	1.357	1.931	1.897	0.0664	0.0664	-4.248	protein kinase 6	PK6
793	PF3D7_0409700	Pf3D7_04_v3	456922	+	1099	0.586	-0.042	1.214	1.491	1.897	0.0665	0.0665	-4.232	peptide chain release factor 2	RF2
3613	PF3D7_1149200	Pf3D7_11_v3	1976407	+	3398	0.367	-0.026	0.761	9.847	1.897	0.0665	0.0665	-4.849	ring-infected erythrocyte surface antigen	NA
2987	PF3D7_1029000	Pf3D7_10_v3	1187503	-	2087	1.139	-0.082	2.361	-2.849	1.896	0.0666	0.0666	-4.045	conserved Plasmodium protein, unknown function, pseudogene	NA
290	PF3D7_0208700	Pf3D7_02_v3	356501	-	1514	0.426	-0.031	0.883	5.716	1.894	0.0669	0.0669	-4.597	conserved Plasmodium protein, unknown function, unspecified product	NA
291	PF3D7_0208700	Pf3D7_02_v3	356501	-	1514	0.426	-0.031	0.883	5.716	1.894	0.0669	0.0669	-4.597	conserved Plasmodium protein, unknown function, unspecified product	NA
4251	PF3D7_1306800	Pf3D7_13_v3	320815	-	1203	-0.341	-0.707	0.025	5.814	-1.892	0.0671	0.0671	-4.573	RED-like protein, putative	NA
5696	PF3D7_1476500	Pf3D7_14_v3	3147490	+	1095	1.656	-0.125	3.437	1.015	1.9	0.0672	0.0672	-4.177	probable protein, unknown function	NA
582	PF3D7_0313800	Pf3D7_03_v3	559334	+	2920	1.337	-0.101	2.775	-1.2	1.893	0.0673	0.0673	-4.108	conserved Plasmodium protein, unknown function	NA
5406	PF3D7_1447600	Pf3D7_14_v3	1942151	-	813	-0.988	-2.051	0.075	-1.141	-1.89	0.0675	0.0675	-4.104	conserved Plasmodium protein, unknown function	NA
5291	PF3D7_1436100	Pf3D7_14_v3	1461388	+	6203	-0.474	-0.984	0.036	5.993	-1.889	0.0676	0.0676	-4.611	conserved Plasmodium membrane protein, unknown function	NA
4900	PF3D7_1371700	Pf3D7_13_v3	2821078	+	2215	0.807	-0.063	1.677	-0.015	1.887	0.0678	0.0678	-4.171	serine/threonine protein kinase, FIKK family	NA
3215	PF3D7_1110500	Pf3D7_11_v3	422057	+	3362	0.389	-0.03	0.809	4.644	1.886	0.068	0.068	-4.512	vacuolar protein sorting-associated protein 35, putative	VPS35
227	PF3D7_0202600	Pf3D7_02_v3	129342	-	4222	0.444	-0.035	0.923	4.905	1.886	0.0681	0.0681	-4.534	conserved Plasmodium protein, unknown function	NA
228	PF3D7_0202600	Pf3D7_02_v3	129342	-	4222	0.444	-0.035	0.923	4.905	1.886	0.0681	0.0681	-4.534	conserved Plasmodium protein, unknown function	NA
173	PF3D7_0113000	Pf3D7_01_v3	487892	-	2236	0.541	-0.043	1.125	13.231	1.892	0.0682	0.0682	-5.03	glutamic acid-rich protein	GARP
2068	PF3D7_0810500	Pf3D7_08_v3	534469	-	2151	-0.542	-1.127	0.044	6.07	-1.882	0.0686	0.0686	-4.626	protein phosphatase PPM7, putative	PPM7
3299	PF3D7_1118600	Pf3D7_11_v3	705556	-	1827	-0.32	-0.666	0.026	7.742	-1.879	0.069	0.069	-4.757	histone acetyltransferase	MYST
2916	PF3D7_1021900	Pf3D7_10_v3	905473	-	6873	0.814	-0.067	1.696	7.924	1.889	0.069	0.069	-4.794	PHAX domain-containing protein, putative	NA
5181	PF3D7_1425400	Pf3D7_14_v3	989220	+	3711	0.96	-0.079	1.999	-1.101	1.878	0.0691	0.0691	-4.132	DEAD/DEAH box helicase, putative	NA
4963	PF3D7_1404400	Pf3D7_14_v3	151765	+	546	0.648	-0.054	1.35	1.337	1.876	0.0694	0.0694	-4.217	mitochondrial ribosomal protein L16 precursor, putative	NA
1495	PF3D7_0619700	Pf3D7_06_v3	828199	-	2191	0.61	-0.052	1.271	0.805	1.875	0.0695	0.0695	-4.207	conserved Plasmodium protein, unknown function	NA
273	PF3D7_0207000	Pf3D7_02_v3	277494	-	963	0.819	-0.069	1.706	0.152	1.876	0.0695	0.0695	-4.172	merozoite surface protein 4	MSP4
145	PF3D7_0110100	Pf3D7_01_v3	389261	-	2805	-0.565	-1.178	0.048	5.467	-1.875	0.0695	0.0695	-4.584	selenocysteine-specific elongation factor selB homologue, putative	NA
775	PF3D7_0408000	Pf3D7_04_v3	394065	-	516	-0.685	-1.428	0.059	1.586	-1.873	0.0698	0.0698	-4.228	conserved Plasmodium protein, unknown function	NA
5288	PF3D7_1435800	Pf3D7_14_v3	1452604	+	1515	0.693	-0.06	1.446	-0.274	1.871	0.0701	0.0701	-4.18	GTPase Era, putative	ERA
3886	PF3D7_1225900	Pf3D7_12_v3	1050280	-	2121	0.63	-0.055	1.314	1.169	1.869	0.0703	0.0703	-4.253	conserved Plasmodium protein, unknown function	NA
4843	PF3D7_1365500	Pf3D7_13_v3	2619028	+	1540	0.48	-0.042	1.002	3.327	1.869	0.0704	0.0704	-4.418	aminomethyltransferase, mitochondrial, putative	GCVT
1566	PF3D7_0626600	Pf3D7_06_v3	1073458	-	438	0.497	-0.044	1.038	4.419	1.869	0.0704	0.0704	-4.48	conserved Plasmodium protein, unknown function	NA
5589	PF3D7_1465700	Pf3D7_14_v3	2658255	-	2657	-0.754	-1.574	0.066	-1.828	-1.869	0.0705	0.0705	-4.11	plasmepsin VIII	NA
4515	PF3D7_1332700	Pf3D7_13_v3	1344806	-	1473	-0.227	-0.474	0.02	8.05	-1.867	0.0706	0.0706	-4.803	ATP-dependent RNA helicase DBP8, putative	DBP8
3771	PF3D7_1214400	Pf3D7_12_v3	610271	-	499	-0.385	-0.803	0.034	4.456	-1.867	0.0706	0.0706	-4.487	ER membrane protein complex subunit 6, putative	EMC6
1199	PF3D7_0524000	Pf3D7_05_v3	998753	+	3372	-0.226	-0.473	0.02	11.609	-1.867	0.0707	0.0707	-5.008	karyopherin beta	KASbeta
3337	PF3D7_1122400	Pf3D7_11_v3	849335	+	3236	-0.337	-0.704	0.03	6.612	-1.866	0.0708	0.0708	-4.697	conserved Plasmodium protein, unknown function	NA
3893	PF3D7_1226600	Pf3D7_12_v3	1077868	-	909	0.724	-0.065	1.513	2.156	1.866	0.0708	0.0708	-4.301	proliferating cell nuclear antigen 2	PCNA2
5458	PF3D7_1452800	Pf3D7_14_v3	2170461	+	1230	0.613	-0.055	1.282	1.319	1.866	0.0709	0.0709	-4.26	conserved Plasmodium protein, unknown function	NA
3194	PF3D7_1108400	Pf3D7_11_v3	365093	+	1008	-0.206	-0.431	0.019	8.637	-1.865	0.071	0.071	-4.846	casein kinase 2, alpha subunit	CK2alpha
4825	PF3D7_1363700	Pf3D7_13_v3	2552554	+	2373	0.843	-0.076	1.763	-0.013	1.865	0.071	0.071	-4.208	conserved Plasmodium protein, unknown function	NA
689	PF3D7_0324300	Pf3D7_03_v3	1012355	+	1110	-0.608	-1.272	0.055	4.818	-1.864	0.0712	0.0712	-4.515	exported protein family 4	EPF4
2202	PF3D7_0823800	Pf3D7_08_v3	1043813	+	1968	0.409	-0.038	0.855	4.769	1.862	0.0713	0.0713	-4.593	DnaJ protein, putative	NA
4254	PF3D7_1307100	Pf3D7_13_v3	327893	+	3036	-0.267	-0.558	0.025	7.838	-1.86	0.0717	0.0717	-4.801	U3 small nucleolar RNA-associated protein 6, putative	UTP6
2466	PF3D7_0915900	Pf3D7_09_v3	665978	+	501	-0.318	-0.667	0.03	6.294	-1.858	0.072	0.072	-4.688	conserved Plasmodium protein, unknown function	NA
990	PF3D7_0503100	Pf3D7_05_v3	127064	-	1614	1.011	-0.096	2.118	1.749	1.86	0.0721	0.0721	-4.309	4-diphosphocytidyl-2-C-methyl-D-erythritol kinase, putative	IspE
2828	PF3D7_1013600	Pf3D7_10_v3	533109	+	6717	0.599	-0.057	1.255	1.267	1.857	0.0721	0.0721	-4.264	conserved Plasmodium protein, unknown function	NA
726	PF3D7_0403000	Pf3D7_04_v3	174829	+	74	0.819	-0.079	1.716	-3.496	1.855	0.0724	0.0724	-4.087	tRNA Asparagine	NA
4627	PF3D7_1343900	Pf3D7_13_v3	1756212	+	1947	-0.385	-0.806	0.037	5.529	-1.854	0.0725	0.0725	-4.614	U4/U6 small nuclear ribonucleoprotein PRP4, putative	PRPF4
5156	PF3D7_1422900	Pf3D7_14_v3	922931	+	1278	-0.543	-1.139	0.053	2.465	-1.854	0.0726	0.0726	-4.336	14-3-3 protein, putative	NA
3606	PF3D7_1148640	Pf3D7_11_v3	1928934	+	4205	-1.607	-3.371	0.158	3.263	-1.865	0.0726	0.0726	-4.381	28S ribosomal RNA	NA
3442	PF3D7_1132700	Pf3D7_11_v3	1268455	+	1002	-0.55	-1.153	0.053	2.448	-1.854	0.0726	0.0726	-4.339	50S ribosomal protein L2, putative	mRPL2
3705	PF3D7_1208000	Pf3D7_12_v3	359995	+	505	0.79	-0.077	1.656	-0.276	1.854	0.0726	0.0726	-4.171	apicoplast ribosomal protein L29 precursor, putative	NA
2957	PF3D7_1026000	Pf3D7_10_v3	1098455	-	1428	-0.55	-1.154	0.053	6.741	-1.855	0.0726	0.0726	-4.746	conserved Plasmodium protein, unknown function	NA
4916	PF3D7_1373300	Pf3D7_13_v3	2877908	+	1234	-1.196	-2.509	0.116	-2.097	-1.853	0.0727	0.0727	-4.119	rifin	RIF
2977	PF3D7_1028000	Pf3D7_10_v3	1160031	+	3391	0.421	-0.041	0.883	6.547	1.852	0.0729	0.0729	-4.75	methyltransferase, putative	NA
5564	PF3D7_1463200	Pf3D7_14_v3	2570434	+	1286	-0.56	-1.175	0.056	2.163	-1.85	0.0732	0.0732	-4.345	replication factor C subunit 3, putative	RFC3
5132	PF3D7_1420600	Pf3D7_14_v3	854094	-	1870	0.492	-0.049	1.034	4.566	1.848	0.0734	0.0734	-4.555	pantothenate kinase, putative	PANK
3318	PF3D7_1120500	Pf3D7_11_v3	772539	+	2504	0.319	-0.032	0.67	6.983	1.848	0.0734	0.0734	-4.746	tRNA nucleotidyltransferase, putative	NA
3680	PF3D7_1205500	Pf3D7_12_v3	242811	+	5358	-0.323	-0.677	0.032	8.865	-1.849	0.0734	0.0734	-4.892	zinc finger protein, putative	NA
4848	PF3D7_1366000	Pf3D7_13_v3	2635213	+	276	-0.556	-1.168	0.056	3.728	-1.847	0.0736	0.0736	-4.447	conserved Plasmodium protein, unknown function	NA
3247	PF3D7_1113700	Pf3D7_11_v3	529493	+	1071	-0.292	-0.614	0.03	5.774	-1.846	0.0737	0.0737	-4.657	glyoxalase I	GloI
3050	PF3D7_1035100	Pf3D7_10_v3	1391445	+	1686	-0.766	-1.611	0.078	-0.474	-1.846	0.0737	0.0737	-4.192	probable protein, unknown function	NA
2343	PF3D7_0904000	Pf3D7_09_v3	187342	-	1281	-0.227	-0.477	0.023	8.922	-1.846	0.0738	0.0738	-4.895	GTPase-activating protein, putative	NA
1463	PF3D7_0616700	Pf3D7_06_v3	691769	-	1551	0.681	-0.07	1.432	0.998	1.844	0.0741	0.0741	-4.299	ras GTPAse, putative	NA
1842	PF3D7_0721200	Pf3D7_07_v3	917958	-	2859	-0.402	-0.846	0.041	5.224	-1.843	0.0742	0.0742	-4.588	conserved Plasmodium protein, unknown function	NA
2716	PF3D7_1002500	Pf3D7_10_v3	123770	-	1113	0.372	-0.039	0.782	7.084	1.842	0.0743	0.0743	-4.768	conserved Plasmodium protein, unknown function	NA
3432	PF3D7_1131700	Pf3D7_11_v3	1225688	-	787	0.864	-0.09	1.817	-2.09	1.842	0.0744	0.0744	-4.142	conserved Plasmodium protein, unknown function	NA
5350	PF3D7_1442000	Pf3D7_14_v3	1705126	-	658	0.539	-0.057	1.135	3.218	1.84	0.0747	0.0747	-4.43	ADP-ribosylation factor, putative	NA
5305	PF3D7_1437500	Pf3D7_14_v3	1521105	+	816	-0.519	-1.092	0.055	4.524	-1.84	0.0747	0.0747	-4.525	conserved Plasmodium membrane protein, unknown function	NA
1691	PF3D7_0706200	Pf3D7_07_v3	304315	+	441	0.998	-0.106	2.102	-2.02	1.838	0.075	0.075	-4.145	conserved Plasmodium protein, unknown function	NA
3873	PF3D7_1224600	Pf3D7_12_v3	1000679	-	1267	0.421	-0.046	0.888	5.64	1.835	0.0754	0.0754	-4.679	cytochrome c heme lyase, putative	CCHL
3422	PF3D7_1130700	Pf3D7_11_v3	1180160	-	5457	0.436	-0.047	0.919	4.227	1.835	0.0754	0.0754	-4.539	structural maintenance of chromosomes protein 1, putative	SMC1
3178	PF3D7_1106800	Pf3D7_11_v3	283869	+	5356	0.565	-0.062	1.191	4.27	1.833	0.0757	0.0757	-4.527	protein kinase, putative	NA
1895	PF3D7_0726600	Pf3D7_07_v3	1140479	+	2276	-0.541	-1.142	0.059	1.685	-1.832	0.0758	0.0758	-4.323	conserved Plasmodium protein, unknown function	NA
3583	PF3D7_1146300	Pf3D7_11_v3	1828240	-	815	0.91	-0.1	1.92	-1.743	1.832	0.0758	0.0758	-4.159	conserved Plasmodium protein, unknown function	NA
1093	PF3D7_0513400	Pf3D7_05_v3	571058	-	1604	0.627	-0.069	1.323	1.658	1.832	0.0759	0.0759	-4.322	GTP-binding protein, putative	NA
2200	PF3D7_0823600	Pf3D7_08_v3	1039907	-	1305	0.543	-0.06	1.145	3.272	1.831	0.076	0.076	-4.45	lipoate-protein ligase B	LipB
5543	PF3D7_1461100	Pf3D7_14_v3	2485864	+	2757	0.707	-0.078	1.492	0.399	1.831	0.0761	0.0761	-4.245	conserved Plasmodium protein, unknown function	NA
3785	PF3D7_1215800	Pf3D7_12_v3	639395	+	1101	1.175	-0.13	2.48	-2.815	1.831	0.0761	0.0761	-4.137	conserved Plasmodium protein, unknown function	NA
843	PF3D7_0414600	Pf3D7_04_v3	658620	-	919	0.943	-0.106	1.993	-2.354	1.828	0.0765	0.0765	-4.154	conserved Apicomplexan protein, unknown function	NA
1711	PF3D7_0708100	Pf3D7_07_v3	372897	-	210	-0.345	-0.728	0.039	6.136	-1.828	0.0765	0.0765	-4.716	DNA-directed RNA polymerases I, II, and III subunit RPABC5, putative	RPB10
5633	PF3D7_1470100	Pf3D7_14_v3	2870069	+	7521	0.349	-0.04	0.739	6.165	1.827	0.0767	0.0767	-4.718	conserved Plasmodium protein, unknown function	NA
853	PF3D7_0415600	Pf3D7_04_v3	689640	-	690	0.88	-0.1	1.859	-0.215	1.826	0.0767	0.0767	-4.225	GTP:AMP phosphotransferase	GAK
447	PF3D7_0300500	Pf3D7_03_v3	55390	-	1195	-1.54	-3.256	0.175	-1.001	-1.831	0.0767	0.0767	-4.189	rifin	RIF
3865	PF3D7_1223800	Pf3D7_12_v3	971268	+	927	-0.585	-1.237	0.067	5.531	-1.824	0.0771	0.0771	-4.664	citrate/oxoglutarate carrier protein, putative	YHM2
2908	PF3D7_1021100	Pf3D7_10_v3	851000	-	5286	-0.414	-0.875	0.047	6.239	-1.824	0.0771	0.0771	-4.721	conserved Plasmodium protein, unknown function	NA
4861	PF3D7_1367300	Pf3D7_13_v3	2685059	-	1273	0.606	-0.071	1.282	2.66	1.821	0.0775	0.0775	-4.387	conserved Plasmodium protein, unknown function	NA
3437	PF3D7_1132200	Pf3D7_11_v3	1248310	-	1923	-0.231	-0.49	0.027	9.87	-1.82	0.0777	0.0777	-4.993	T-complex protein 1 subunit alpha	TCP1
1322	PF3D7_0602900	Pf3D7_06_v3	118638	-	1566	-0.437	-0.925	0.052	5.047	-1.818	0.0781	0.0781	-4.607	conserved Plasmodium protein, unknown function	NA
5789	PF3D7_API05700	Pf3D7_API_v3	27421	+	1426	-1.412	-2.992	0.168	-2.825	-1.819	0.0781	0.0781	-4.15	small subunit ribosomal RNA	NA
4914	PF3D7_1373100	Pf3D7_13_v3	2871860	-	1229	1.099	-0.132	2.33	-2.984	1.816	0.0784	0.0784	-4.151	rifin	RIF
4921	PF3D7_1400300	Pf3D7_14_v3	10974	-	1144	1.194	-0.144	2.532	-3.146	1.815	0.0786	0.0786	-4.157	rifin	RIF
3614	PF3D7_1149300	Pf3D7_11_v3	1982354	+	1894	-0.446	-0.945	0.054	3.77	-1.815	0.0786	0.0786	-4.49	serine/threonine protein kinase, FIKK family	FIKK11
808	PF3D7_0411200	Pf3D7_04_v3	505933	-	3738	0.584	-0.071	1.239	2.607	1.814	0.0787	0.0787	-4.474	conserved Plasmodium protein, unknown function	NA
4123	PF3D7_1249400	Pf3D7_12_v3	2016325	-	432	0.64	-0.078	1.357	1.107	1.814	0.0787	0.0787	-4.304	conserved Plasmodium protein, unknown function	NA
4741	PF3D7_1355300	Pf3D7_13_v3	2195449	+	1530	-0.382	-0.81	0.046	6.298	-1.813	0.0789	0.0789	-4.747	histone-lysine N-methyltransferase, putative	SET6
3845	PF3D7_1221800	Pf3D7_12_v3	869260	+	2109	0.546	-0.067	1.158	1.791	1.812	0.079	0.079	-4.361	conserved Plasmodium protein, unknown function	NA
5293	PF3D7_1436300	Pf3D7_14_v3	1479777	+	2982	-0.28	-0.594	0.034	10.374	-1.811	0.0791	0.0791	-5.042	translocon component PTEX150	PTEX150
865	PF3D7_0416800	Pf3D7_04_v3	729962	+	1262	0.377	-0.046	0.801	7.807	1.811	0.0792	0.0792	-4.897	small GTP-binding protein sar1	SAR1
2630	PF3D7_0931900	Pf3D7_09_v3	1275268	-	1217	0.967	-0.12	2.054	0.571	1.81	0.0793	0.0793	-4.306	adenylate kinase-like protein 2	AKLP2
5507	PF3D7_1457600	Pf3D7_14_v3	2363578	+	1793	-0.276	-0.586	0.034	5.972	-1.809	0.0794	0.0794	-4.733	conserved Plasmodium protein, unknown function	NA
1145	PF3D7_0518600	Pf3D7_05_v3	769310	+	3831	-0.608	-1.292	0.076	4.164	-1.808	0.0796	0.0796	-4.556	WD repeat-containing protein 26, putative	WDR26
1000	PF3D7_0504200	Pf3D7_05_v3	167649	+	1854	1.047	-0.132	2.225	-2.32	1.806	0.08	0.08	-4.188	ATP-dependent RNA helicase DDX27, putative	DDX27
2409	PF3D7_0910200	Pf3D7_09_v3	464559	+	9210	-0.547	-1.164	0.07	7.324	-1.807	0.0801	0.0801	-4.861	conserved Plasmodium protein, unknown function	NA
3039	PF3D7_1034000	Pf3D7_10_v3	1359318	-	1992	-0.335	-0.714	0.043	5.975	-1.804	0.0803	0.0803	-4.741	Sec1 family protein, putative	NA
3091	PF3D7_1039200	Pf3D7_10_v3	1576441	-	551	1.046	-0.134	2.225	-1.609	1.803	0.0804	0.0804	-4.203	Plasmodium exported protein, unknown function, pseudogene	NA
259	PF3D7_0205700	Pf3D7_02_v3	231141	+	1389	-0.355	-0.755	0.045	6.37	-1.803	0.0804	0.0804	-4.769	RNA-binding protein, putative	NA
260	PF3D7_0205700	Pf3D7_02_v3	231141	+	1389	-0.355	-0.755	0.045	6.37	-1.803	0.0804	0.0804	-4.769	RNA-binding protein, putative	NA
3921	PF3D7_1229400	Pf3D7_12_v3	1208912	+	631	-0.506	-1.077	0.065	8.524	-1.804	0.0805	0.0805	-4.934	macrophage migration inhibitory factor	MIF
4222	PF3D7_1304000	Pf3D7_13_v3	216652	-	3378	0.93	-0.12	1.981	-1.708	1.801	0.0807	0.0807	-4.205	condensin complex subunit 2, putative	NA
1043	PF3D7_0508500	Pf3D7_05_v3	347219	-	7821	0.515	-0.067	1.097	4.738	1.801	0.0807	0.0807	-4.628	guanidine nucleotide exchange factor	RCC1
2795	PF3D7_1010400	Pf3D7_10_v3	415404	-	2068	0.436	-0.056	0.929	5.831	1.801	0.0808	0.0808	-4.7	conserved Plasmodium protein, unknown function	NA
1375	PF3D7_0608200	Pf3D7_06_v3	341874	-	948	0.526	-0.068	1.119	0.895	1.801	0.0808	0.0808	-4.324	conserved Plasmodium protein, unknown function	NA
461	PF3D7_0301900	Pf3D7_03_v3	105913	-	1197	0.752	-0.098	1.602	1.169	1.798	0.0811	0.0811	-4.325	conserved Plasmodium protein, unknown function	NA
3914	PF3D7_1228700	Pf3D7_12_v3	1165508	+	3641	-0.693	-1.476	0.091	-0.281	-1.798	0.0812	0.0812	-4.277	conserved Plasmodium protein, unknown function	NA
803	PF3D7_0410700	Pf3D7_04_v3	481177	-	2715	0.595	-0.078	1.268	3.234	1.798	0.0813	0.0813	-4.509	ribosome biogenesis GTPase A, putative	RbgA
1607	PF3D7_0630600	Pf3D7_06_v3	1279820	+	3427	-0.38	-0.811	0.05	5.279	-1.797	0.0814	0.0814	-4.701	conserved protein, unknown function	NA
5064	PF3D7_1413900	Pf3D7_14_v3	551862	+	1374	-0.38	-0.81	0.05	5.583	-1.797	0.0814	0.0814	-4.722	DnaJ protein, putative	NA
3427	PF3D7_1131200	Pf3D7_11_v3	1199253	+	2553	1.064	-0.141	2.269	1.187	1.8	0.0815	0.0815	-4.422	conserved Plasmodium protein, unknown function	NA
1321	PF3D7_0602800	Pf3D7_06_v3	116084	+	1941	-0.371	-0.793	0.05	5.397	-1.791	0.0823	0.0823	-4.685	JmjC domain containing protein	JmjC2
4398	PF3D7_1321300	Pf3D7_13_v3	876221	-	10044	-0.292	-0.623	0.04	7.235	-1.79	0.0826	0.0826	-4.874	conserved Plasmodium membrane protein, unknown function	NA
2597	PF3D7_0928700	Pf3D7_09_v3	1150648	-	4506	0.667	-0.091	1.426	-0.253	1.79	0.0826	0.0826	-4.283	conserved Plasmodium protein, unknown function	NA
551	PF3D7_0310800	Pf3D7_03_v3	464662	+	330	-0.259	-0.554	0.035	5.794	-1.789	0.0827	0.0827	-4.752	conserved Plasmodium protein, unknown function	NA
2717	PF3D7_1002600	Pf3D7_10_v3	125939	+	1662	0.658	-0.09	1.407	0.908	1.789	0.0827	0.0827	-4.352	conserved Plasmodium protein, unknown function	NA
2113	PF3D7_0814900	Pf3D7_08_v3	708228	+	597	-0.406	-0.868	0.056	7.429	-1.789	0.0827	0.0827	-4.892	superoxide dismutase [Fe]	FeSOD
5478	PF3D7_1454800	Pf3D7_14_v3	2243873	+	495	-0.594	-1.27	0.082	0.322	-1.788	0.0829	0.0829	-4.299	conserved Plasmodium protein, unknown function	NA
4039	PF3D7_1241100	Pf3D7_12_v3	1746444	-	1550	-0.314	-0.672	0.043	7.436	-1.787	0.0829	0.0829	-4.891	polyadenylation factor subunit 2, putative	PFS2
4111	PF3D7_1248200	Pf3D7_12_v3	1977865	+	1074	-0.319	-0.683	0.044	6.544	-1.787	0.0829	0.0829	-4.816	pre-mRNA-splicing factor RBM22, putative	RBM22
5089	PF3D7_1416400	Pf3D7_14_v3	661098	-	4001	0.686	-0.095	1.466	4.107	1.787	0.083	0.083	-4.57	conserved Plasmodium protein, unknown function	NA
1689	PF3D7_0706000	Pf3D7_07_v3	293400	+	3690	-0.243	-0.519	0.033	9.118	-1.787	0.083	0.083	-5.006	importin-7, putative	NA
2896	PF3D7_1019900	Pf3D7_10_v3	808618	-	375	0.74	-0.103	1.583	-1.322	1.786	0.0832	0.0832	-4.248	autophagy-related protein 8	ATG8
1928	PF3D7_0729800	Pf3D7_07_v3	1264445	+	294	-0.889	-1.902	0.123	-4.192	-1.786	0.0832	0.0832	-4.177	dynein light chain, putative	NA
2209	PF3D7_0824500	Pf3D7_08_v3	1066154	+	1319	0.706	-0.098	1.51	1.832	1.785	0.0833	0.0833	-4.4	conserved Plasmodium protein, unknown function	NA
4745	PF3D7_1355700	Pf3D7_13_v3	2206592	-	3867	-0.39	-0.833	0.054	8.276	-1.785	0.0833	0.0833	-4.956	NLI interacting factor-like phosphatase, putative	NIF3
3885	PF3D7_1225800	Pf3D7_12_v3	1045995	+	3837	-0.271	-0.579	0.038	9.325	-1.785	0.0833	0.0833	-5.024	ubiquitin-activating enzyme E1	UBA1
3231	PF3D7_1112100	Pf3D7_11_v3	462290	+	7383	0.5	-0.07	1.07	4.478	1.784	0.0835	0.0835	-4.646	conserved Plasmodium protein, unknown function	NA
4739	PF3D7_1355100	Pf3D7_13_v3	2187435	+	2790	0.444	-0.063	0.952	4.408	1.781	0.084	0.084	-4.625	DNA replication licensing factor MCM6	MCM6
3132	PF3D7_1102300	Pf3D7_11_v3	110027	-	1403	-1.281	-2.747	0.184	5.239	-1.792	0.0841	0.0841	-4.715	Plasmodium exported protein, unknown function	NA
4016	PF3D7_1238800	Pf3D7_12_v3	1610363	+	2379	-0.268	-0.574	0.038	9.691	-1.779	0.0843	0.0843	-5.044	acyl-CoA synthetase	ACS11
2941	PF3D7_1024400	Pf3D7_10_v3	1023205	-	1665	0.999	-0.143	2.141	-0.925	1.779	0.0843	0.0843	-4.269	conserved Plasmodium protein, unknown function	NA
1349	PF3D7_0605600	Pf3D7_06_v3	228132	-	6704	-0.731	-1.567	0.105	1.425	-1.779	0.0843	0.0843	-4.404	nucleoside diphosphate kinase, putative	NA
5284	PF3D7_1435500	Pf3D7_14_v3	1436280	+	765	-0.306	-0.655	0.044	6.047	-1.779	0.0844	0.0844	-4.791	conserved Plasmodium protein, unknown function	NA
5134	PF3D7_1420800	Pf3D7_14_v3	863623	-	1198	0.685	-0.098	1.467	-0.225	1.779	0.0844	0.0844	-4.291	dynein-associated protein, putative	NA
782	PF3D7_0408700	Pf3D7_04_v3	417372	-	3453	-0.902	-1.933	0.13	-2.755	-1.778	0.0845	0.0845	-4.214	perforin-like protein 1	PLP1
4114	PF3D7_1248500	Pf3D7_12_v3	1983480	-	870	-0.251	-0.539	0.036	9.231	-1.777	0.0846	0.0846	-5.026	bax inhibitor 1, putative	NA
5495	PF3D7_1456400	Pf3D7_14_v3	2309181	-	3292	1.147	-0.165	2.46	-1.909	1.778	0.0846	0.0846	-4.229	conserved Plasmodium protein, unknown function	NA
942	PF3D7_0424500	Pf3D7_04_v3	1110060	+	2234	-0.273	-0.586	0.04	8.614	-1.777	0.0847	0.0847	-4.99	serine/threonine protein kinase, FIKK family	FIKK4.1
4582	PF3D7_1339400	Pf3D7_13_v3	1585806	-	594	0.68	-0.099	1.459	1.432	1.776	0.0848	0.0848	-4.405	conserved Plasmodium protein, unknown function	NA
2057	PF3D7_0809400	Pf3D7_08_v3	475573	+	2553	0.821	-0.119	1.76	0.794	1.776	0.0848	0.0848	-4.378	conserved Plasmodium protein, unknown function	NA
5673	PF3D7_1474200	Pf3D7_14_v3	3023852	-	14981	0.722	-0.105	1.549	-0.034	1.775	0.0849	0.0849	-4.294	conserved Plasmodium membrane protein, unknown function	NA
2793	PF3D7_1010200	Pf3D7_10_v3	405017	-	5520	-0.264	-0.567	0.038	8.312	-1.775	0.085	0.085	-4.979	DNA2/NAM7 helicase, putative	NA
279	PF3D7_0207600	Pf3D7_02_v3	303593	-	3435	1.121	-0.164	2.406	-0.327	1.775	0.0851	0.0851	-4.297	serine repeat antigen 5	SERA5
4448	PF3D7_1326200	Pf3D7_13_v3	1090329	-	999	0.36	-0.054	0.773	4.29	1.77	0.0858	0.0858	-4.626	conserved Plasmodium protein, unknown function	NA
5104	PF3D7_1417900	Pf3D7_14_v3	757195	-	1361	0.891	-0.133	1.915	-1.653	1.769	0.0859	0.0859	-4.254	conserved Plasmodium protein, unknown function	NA
472	PF3D7_0303000	Pf3D7_03_v3	159353	-	2352	-0.338	-0.728	0.051	5.172	-1.766	0.0866	0.0866	-4.712	N-ethylmaleimide-sensitive fusion protein	NSF
2831	PF3D7_1013900	Pf3D7_10_v3	545679	-	3225	-0.344	-0.74	0.052	7.35	-1.766	0.0866	0.0866	-4.925	translation initiation factor eIF-2B subunit delta, putative	NA
5310	PF3D7_1438000	Pf3D7_14_v3	1536484	-	1986	-0.252	-0.542	0.038	9.785	-1.765	0.0867	0.0867	-5.082	eukaryotic translation initiation factor eIF2A, putative	NA
3852	PF3D7_1222500	Pf3D7_12_v3	899198	-	1879	-0.374	-0.805	0.057	5.527	-1.763	0.0871	0.0871	-4.755	diphthine--ammonia ligase, putative	DPH6
591	PF3D7_0314600	Pf3D7_03_v3	586555	+	777	0.307	-0.047	0.662	5.924	1.762	0.0872	0.0872	-4.812	conserved Plasmodium protein, unknown function	NA
3358	PF3D7_1124500	Pf3D7_11_v3	966980	+	1827	-0.739	-1.592	0.114	2.93	-1.761	0.0873	0.0873	-4.516	pyruvate dehydrogenase E1 component subunit alpha	pdhA
1983	PF3D7_0802000	Pf3D7_08_v3	146089	+	4194	0.662	-0.103	1.427	7.957	1.767	0.0874	0.0874	-5.005	glutamate dehydrogenase, putative	GDH3
4939	PF3D7_1402000	Pf3D7_14_v3	77258	-	3166	0.571	-0.089	1.231	4.1	1.759	0.0877	0.0877	-4.658	conserved Plasmodium protein, unknown function	NA
2287	PF3D7_0832200	Pf3D7_08_v3	1392168	+	1324	2.32	-0.367	5.006	3.497	1.773	0.0877	0.0877	-4.585	Plasmodium exported protein (PHISTa-like), unknown function	NA
2288	PF3D7_0832200	Pf3D7_08_v3	1392168	+	1324	2.32	-0.367	5.006	3.497	1.773	0.0877	0.0877	-4.585	Plasmodium exported protein (PHISTa-like), unknown function	NA
4546	PF3D7_1335800	Pf3D7_13_v3	1462180	+	1812	0.889	-0.139	1.917	-0.018	1.758	0.088	0.088	-4.358	conserved Plasmodium protein, unknown function	NA
721	PF3D7_0402500	Pf3D7_04_v3	155877	+	1108	-1.078	-2.325	0.17	-2.624	-1.756	0.0882	0.0882	-4.247	rifin, pseudogene	RIF
4126	PF3D7_1249700	Pf3D7_12_v3	2023455	-	2727	-0.813	-1.755	0.129	-0.931	-1.756	0.0883	0.0883	-4.29	conserved Plasmodium protein, unknown function	NA
324	PF3D7_0211900	Pf3D7_02_v3	477432	-	1660	0.614	-0.097	1.325	3.285	1.755	0.0883	0.0883	-4.561	conserved Plasmodium protein, unknown function	NA
4684	PF3D7_1349600	Pf3D7_13_v3	1997023	+	1260	0.431	-0.068	0.931	4.156	1.755	0.0884	0.0884	-4.661	conserved Plasmodium protein, unknown function	NA
2310	PF3D7_0900800	Pf3D7_09_v3	52648	-	1373	1.249	-0.199	2.698	0.805	1.758	0.0885	0.0885	-4.37	erythrocyte membrane protein 1 (PfEMP1), exon 2, pseudogene	VAR
4693	PF3D7_1350500	Pf3D7_13_v3	2015367	-	3435	-0.325	-0.702	0.052	7.882	-1.754	0.0886	0.0886	-4.977	conserved Plasmodium protein, unknown function	NA
1747	PF3D7_0711600	Pf3D7_07_v3	508474	+	136	-0.838	-1.809	0.134	-4.154	-1.753	0.0887	0.0887	-4.221	Plasmodium RNA of unknown function RUF6	NA
3950	PF3D7_1232200	Pf3D7_12_v3	1333134	+	1763	0.668	-0.107	1.442	1.648	1.753	0.0888	0.0888	-4.447	dihydrolipoyl dehydrogenase, mitochondrial	LPD1
1451	PF3D7_0615500	Pf3D7_06_v3	644052	+	2118	-0.488	-1.054	0.078	2.984	-1.752	0.089	0.089	-4.527	cdc2-related protein kinase 5	CRK5
3946	PF3D7_1231800	Pf3D7_12_v3	1314696	+	5475	-0.351	-0.758	0.057	7.592	-1.751	0.0892	0.0892	-4.982	asparagine-rich protein, putative	NA
4624	PF3D7_1343600	Pf3D7_13_v3	1721904	-	1782	0.499	-0.082	1.079	2.978	1.748	0.0897	0.0897	-4.535	UDP-N-acetylglucosamine pyrophosphorylase, putative	NA
81	PF3D7_0103900	Pf3D7_01_v3	172864	+	1728	0.79	-0.131	1.711	2.885	1.746	0.0901	0.0901	-4.561	parasite-infected erythrocyte surface protein	PIESP15
3650	PF3D7_1202400	Pf3D7_12_v3	141642	-	1627	0.56	-0.093	1.213	3.3	1.745	0.0902	0.0902	-4.561	peptidyl-prolyl cis-trans isomerase	CYP26
4640	PF3D7_1345200	Pf3D7_13_v3	1812220	-	1710	0.416	-0.069	0.901	4.785	1.744	0.0904	0.0904	-4.726	rhomboid protease ROM6, putative	ROM6
3272	PF3D7_1116100	Pf3D7_11_v3	607902	-	5493	0.629	-0.105	1.363	1.609	1.743	0.0905	0.0905	-4.466	serine esterase, putative	NA
4165	PF3D7_1253600	Pf3D7_12_v3	2188760	+	854	-1.968	-4.27	0.333	-2.555	-1.748	0.0909	0.0909	-4.258	rifin, pseudogene	RIF
1197	PF3D7_0523800	Pf3D7_05_v3	990005	+	2055	-0.31	-0.671	0.052	7.04	-1.741	0.0909	0.0909	-4.93	transporter, putative	NA
1543	PF3D7_0624400	Pf3D7_06_v3	990375	-	1824	0.444	-0.075	0.963	2.437	1.74	0.0911	0.0911	-4.553	conserved Plasmodium protein, unknown function	NA
400	PF3D7_0219400	Pf3D7_02_v3	774815	+	1222	0.338	-0.057	0.733	5.757	1.74	0.0911	0.0911	-4.841	ribosome associated membrane protein RAMP4, putative, unspecified product	NA
401	PF3D7_0219400	Pf3D7_02_v3	774815	+	1222	0.338	-0.057	0.733	5.757	1.74	0.0911	0.0911	-4.841	ribosome associated membrane protein RAMP4, putative, unspecified product	NA
4063	PF3D7_1243500	Pf3D7_12_v3	1820881	-	1715	0.617	-0.104	1.339	1.285	1.74	0.0911	0.0911	-4.426	vacuolar-sorting protein SNF7, putative	SNF7
857	PF3D7_0416000	Pf3D7_04_v3	701526	-	2637	0.455	-0.077	0.986	6.691	1.739	0.0912	0.0912	-4.937	RNA-binding protein, putative	NA
119	PF3D7_0107600	Pf3D7_01_v3	314618	+	4788	-0.525	-1.139	0.089	2.976	-1.739	0.0912	0.0912	-4.566	serine/threonine protein kinase, putative	NA
496	PF3D7_0305400	Pf3D7_03_v3	260332	+	754	-0.443	-0.961	0.075	3.71	-1.739	0.0913	0.0913	-4.607	conserved Plasmodium protein, unknown function	NA
3872	PF3D7_1224500	Pf3D7_12_v3	998353	+	923	0.563	-0.096	1.222	1.911	1.736	0.0917	0.0917	-4.5	histone chaperone ASF1, putative	ASF1
3983	PF3D7_1235500	Pf3D7_12_v3	1481002	+	1941	-0.309	-0.672	0.053	5.998	-1.736	0.0918	0.0918	-4.855	mRNA methyltransferase, putative	NA
818	PF3D7_0412200	Pf3D7_04_v3	541811	-	999	-0.402	-0.873	0.069	3.669	-1.735	0.0919	0.0919	-4.615	conserved Plasmodium protein, unknown function	NA
1859	PF3D7_0722900	Pf3D7_07_v3	965664	-	2119	0.787	-0.135	1.71	-1.384	1.735	0.0919	0.0919	-4.301	conserved Plasmodium protein, unknown function	NA
2541	PF3D7_0923300	Pf3D7_09_v3	947033	+	2466	0.376	-0.065	0.817	4.868	1.734	0.0921	0.0921	-4.737	perforin-like protein 3	PLP3
5389	PF3D7_1445900	Pf3D7_14_v3	1885443	+	2881	-0.2	-0.434	0.035	10.052	-1.733	0.0922	0.0922	-5.145	ATP-dependent RNA helicase DDX5, putative	DDX5
4419	PF3D7_1323300	Pf3D7_13_v3	970278	+	1059	-0.421	-0.915	0.073	2.915	-1.733	0.0923	0.0923	-4.569	acetyltransferase, GNAT family, putative	NA
2408	PF3D7_0910100	Pf3D7_09_v3	456959	-	4360	-0.209	-0.455	0.037	8.245	-1.731	0.0926	0.0926	-5.046	exportin-7, putative	NA
1681	PF3D7_0705200	Pf3D7_07_v3	256086	+	4599	0.802	-0.141	1.744	-2.125	1.729	0.0931	0.0931	-4.299	conserved Plasmodium protein, unknown function	NA
5508	PF3D7_1457700	Pf3D7_14_v3	2367287	+	4437	-0.29	-0.63	0.051	8.421	-1.728	0.0931	0.0931	-5.058	large ribosomal subunit nuclear export factor, putative	NA
308	PF3D7_0210300	Pf3D7_02_v3	423063	-	1592	0.854	-0.151	1.858	2.928	1.731	0.0931	0.0931	-4.572	monocarboxylate transporter, putative	NA
1991	PF3D7_0802800	Pf3D7_08_v3	191976	+	2128	-0.572	-1.246	0.101	-1.143	-1.728	0.0931	0.0931	-4.342	serine/threonine protein phosphatase 2B catalytic subunit A	CNA
4112	PF3D7_1248300	Pf3D7_12_v3	1979786	-	414	-0.426	-0.928	0.075	2.437	-1.728	0.0932	0.0932	-4.52	conserved Plasmodium membrane protein, unknown function	NA
368	PF3D7_0216300	Pf3D7_02_v3	670413	+	4146	0.461	-0.082	1.004	5.612	1.727	0.0933	0.0933	-4.829	conserved Plasmodium protein, unknown function	NA
2871	PF3D7_1017500	Pf3D7_10_v3	701746	+	677	0.702	-0.124	1.528	2.763	1.728	0.0933	0.0933	-4.552	conserved Plasmodium protein, unknown function	NA
596	PF3D7_0315100	Pf3D7_03_v3	612739	-	684	-0.287	-0.625	0.051	7.322	-1.727	0.0934	0.0934	-4.982	eukaryotic translation initiation factor 4E	eIF4E
1904	PF3D7_0727500	Pf3D7_07_v3	1164455	-	2124	0.742	-0.133	1.618	-0.245	1.725	0.0938	0.0938	-4.393	conserved Plasmodium protein, unknown function	NA
3933	PF3D7_1230500	Pf3D7_12_v3	1253973	-	1509	-0.286	-0.624	0.051	6.113	-1.725	0.0938	0.0938	-4.884	WD repeat-containing protein, putative	NA
2213	PF3D7_0824900	Pf3D7_08_v3	1080055	-	2937	-0.321	-0.7	0.058	7.687	-1.724	0.0939	0.0939	-5.013	conserved Plasmodium protein, unknown function	NA
3027	PF3D7_1032800	Pf3D7_10_v3	1313255	-	1467	0.783	-0.141	1.707	-1.476	1.723	0.094	0.094	-4.322	leucine-rich repeat protein	LRR1
3558	PF3D7_1143800	Pf3D7_11_v3	1748439	+	2700	-0.26	-0.567	0.047	7.376	-1.723	0.0941	0.0941	-4.992	conserved Plasmodium protein, unknown function	NA
2262	PF3D7_0829800	Pf3D7_08_v3	1272718	+	2739	1.291	-0.237	2.819	8.092	1.735	0.0943	0.0943	-5.073	unspecified product	NA
5667	PF3D7_1473500	Pf3D7_14_v3	2993252	-	2028	-0.287	-0.625	0.052	6.985	-1.721	0.0945	0.0945	-4.972	conserved Plasmodium protein, unknown function	NA
468	PF3D7_0302600	Pf3D7_03_v3	141556	+	4098	0.8	-0.146	1.746	-0.998	1.721	0.0946	0.0946	-4.364	ABC transporter B family member 4, putative	ABCB4
2017	PF3D7_0805400	Pf3D7_08_v3	303370	-	1227	0.419	-0.077	0.916	5.263	1.717	0.0952	0.0952	-4.796	acetyltransferase, putative	NA
253	PF3D7_0205100	Pf3D7_02_v3	214838	-	2511	-0.765	-1.672	0.141	0.572	-1.717	0.0952	0.0952	-4.438	conserved Plasmodium protein, unknown function	NA
2326	PF3D7_0902400	Pf3D7_09_v3	106514	-	1893	0.703	-0.129	1.535	3.795	1.717	0.0952	0.0952	-4.642	serine/threonine protein kinase, FIKK family	FIKK9.5
2133	PF3D7_0816900	Pf3D7_08_v3	770946	+	828	0.814	-0.152	1.78	-0.404	1.714	0.0957	0.0957	-4.386	adenylate kinase 2	AK2
3179	PF3D7_1106900	Pf3D7_11_v3	289667	+	620	0.541	-0.101	1.183	0.85	1.714	0.0957	0.0957	-4.442	conserved Plasmodium protein, unknown function	NA
1916	PF3D7_0728600	Pf3D7_07_v3	1218426	+	7048	0.799	-0.149	1.747	0.227	1.714	0.0958	0.0958	-4.436	zinc finger, C3HC4 type, putative	NA
3462	PF3D7_1134700	Pf3D7_11_v3	1359364	-	4750	-0.262	-0.573	0.05	9.134	-1.708	0.0969	0.0969	-5.131	DNA-directed RNA polymerase I subunit RPA2, putative	RPA2
1897	PF3D7_0726800	Pf3D7_07_v3	1144046	-	685	0.619	-0.118	1.355	-1.188	1.708	0.0969	0.0969	-4.367	dolichyl-diphosphooligosaccharide--protein glycosyltransferase subunit DAD1, putative	DAD1
3594	PF3D7_1147500	Pf3D7_11_v3	1889826	-	2772	-0.536	-1.175	0.103	4.511	-1.707	0.097	0.097	-4.771	protein farnesyltransferase subunit beta	NA
3320	PF3D7_1120700	Pf3D7_11_v3	784592	-	3759	0.595	-0.114	1.305	1.867	1.706	0.0972	0.0972	-4.521	conserved Plasmodium protein, unknown function	NA
734	PF3D7_0403800	Pf3D7_04_v3	211515	-	2340	-0.344	-0.754	0.066	4.753	-1.705	0.0974	0.0974	-4.764	alpha/beta hydrolase, putative	NA
5496	PF3D7_1456500	Pf3D7_14_v3	2314380	+	7176	0.629	-0.121	1.379	-0.738	1.705	0.0975	0.0975	-4.383	conserved Plasmodium protein, unknown function	NA
4894	PF3D7_1370900	Pf3D7_13_v3	2797507	+	597	1.066	-0.208	2.339	6.294	1.715	0.0975	0.0975	-4.978	unspecified product	NA
879	PF3D7_0418200	Pf3D7_04_v3	817400	+	1290	-0.251	-0.55	0.049	8.83	-1.704	0.0977	0.0977	-5.122	eukaryotic translation initiation factor 3 subunit M, putative	EIF3M
1191	PF3D7_0523200	Pf3D7_05_v3	966123	+	3615	0.416	-0.081	0.913	2.845	1.703	0.0979	0.0979	-4.62	conserved Plasmodium protein, unknown function	NA
307	PF3D7_0210200	Pf3D7_02_v3	413278	-	7860	0.604	-0.117	1.324	4.34	1.703	0.0979	0.0979	-4.746	conserved Plasmodium protein, unknown function	NA
1887	PF3D7_0725800	Pf3D7_07_v3	1086213	+	159	-1.167	-2.56	0.227	-2.549	-1.702	0.098	0.098	-4.319	5.8S ribosomal RNA	NA
3999	PF3D7_1237100	Pf3D7_12_v3	1540766	-	8379	0.403	-0.078	0.884	5.965	1.702	0.098	0.098	-4.903	conserved Plasmodium protein, unknown function	NA
5294	PF3D7_1436400	Pf3D7_14_v3	1484166	+	3964	0.505	-0.098	1.107	1.195	1.702	0.098	0.098	-4.483	conserved Plasmodium protein, unknown function	NA
477	PF3D7_0303500	Pf3D7_03_v3	182731	+	6681	0.729	-0.142	1.6	0.185	1.702	0.098	0.098	-4.427	spindle pole body protein, putative	NA
5269	PF3D7_1434000	Pf3D7_14_v3	1364749	-	1365	0.439	-0.086	0.963	3.944	1.702	0.0981	0.0981	-4.736	CCR4-associated factor 16, putative	CAF16
240	PF3D7_0203800	Pf3D7_02_v3	171563	-	3350	0.704	-0.137	1.546	0.765	1.702	0.0981	0.0981	-4.441	conserved Plasmodium protein, unknown function	NA
5279	PF3D7_1435000	Pf3D7_14_v3	1414023	+	1293	0.682	-0.133	1.497	-1.618	1.702	0.0981	0.0981	-4.354	cytochrome c oxidase assembly protein COX15, putative	COX15
5702	PF3D7_1477100	Pf3D7_14_v3	3172972	-	673	-0.769	-1.688	0.151	-3.147	-1.7	0.0984	0.0984	-4.309	Plasmodium exported protein (hyp6), unknown function	NA
2891	PF3D7_1019500	Pf3D7_10_v3	787745	-	7476	-0.518	-1.137	0.102	2.828	-1.7	0.0985	0.0985	-4.627	conserved Plasmodium membrane protein, unknown function	NA
2892	PF3D7_1019500	Pf3D7_10_v3	787745	-	7476	-0.518	-1.137	0.102	2.828	-1.7	0.0985	0.0985	-4.627	conserved Plasmodium membrane protein, unknown function	NA
567	PF3D7_0312400	Pf3D7_03_v3	524154	-	2286	0.594	-0.117	1.305	3.588	1.698	0.0989	0.0989	-4.713	glycogen synthase kinase 3	GSK3
3134	PF3D7_1102500	Pf3D7_11_v3	119412	-	2095	-1.579	-3.476	0.317	7.124	-1.71	0.0989	0.0989	-4.997	Plasmodium exported protein (PHISTb), unknown function	GEXP02
3435	PF3D7_1132000	Pf3D7_11_v3	1239900	+	2649	-0.345	-0.758	0.069	6.878	-1.696	0.0992	0.0992	-4.996	ubiquitin-like protein, putative	NA
3197	PF3D7_1108700	Pf3D7_11_v3	373238	-	1623	0.294	-0.059	0.647	6.933	1.694	0.0995	0.0995	-5.013	heat shock protein DnaJ homologue Pfj2	NA
4730	PF3D7_1354100	Pf3D7_13_v3	2158129	-	1071	0.448	-0.09	0.986	2.587	1.694	0.0996	0.0996	-4.625	conserved Plasmodium protein, unknown function	NA
934	PF3D7_0423700	Pf3D7_04_v3	1071435	-	411	-0.922	-2.029	0.186	1.804	-1.695	0.0998	0.0998	-4.575	early transcribed membrane protein 4	ETRAMP4
566	PF3D7_0312300	Pf3D7_03_v3	521969	+	915	-0.315	-0.694	0.064	5.045	-1.692	0.0999	0.0999	-4.846	26S proteasome regulatory subunit RPN12, putative	RPN12
4259	PF3D7_1307600	Pf3D7_13_v3	339927	-	1962	0.356	-0.072	0.784	3.922	1.692	0.0999	0.0999	-4.738	DNA-directed RNA polymerase alpha chain, putative	NA
483	PF3D7_0304100	Pf3D7_03_v3	204542	+	1578	-0.697	-1.535	0.141	-0.232	-1.692	0.0999	0.0999	-4.416	inner membrane complex protein 1e, putative	IMC1e
389	PF3D7_0218300	Pf3D7_02_v3	747566	-	1800	0.408	-0.082	0.898	4.16	1.692	0.1	0.1	-4.738	apicoplast RNA methyltransferase precursor, putative	NA
75	PF3D7_0103300	Pf3D7_01_v3	143640	-	2757	-0.346	-0.762	0.07	7.55	-1.69	0.1	0.1	-5.057	conserved Plasmodium protein, unknown function	NA
4332	PF3D7_1314700	Pf3D7_13_v3	626481	-	2195	0.542	-0.11	1.194	4.414	1.69	0.1	0.1	-4.778	conserved Plasmodium protein, unknown function	NA
4802	PF3D7_1361500	Pf3D7_13_v3	2465491	-	2492	0.739	-0.15	1.628	-2.053	1.69	0.1	0.1	-4.346	conserved Plasmodium protein, unknown function	NA
4803	PF3D7_1361500	Pf3D7_13_v3	2465491	-	2492	0.739	-0.15	1.628	-2.053	1.69	0.1	0.1	-4.346	conserved Plasmodium protein, unknown function	NA
1505	PF3D7_0620700	Pf3D7_06_v3	859026	-	1089	-0.639	-1.407	0.13	-0.016	-1.69	0.1	0.1	-4.426	DnaJ protein, putative	NA
2992	PF3D7_1029400	Pf3D7_10_v3	1200894	-	1506	-0.287	-0.632	0.058	5.896	-1.69	0.1	0.1	-4.92	LEM3/CDC50 family protein, putative	NA
256	PF3D7_0205400	Pf3D7_02_v3	223478	+	1374	-0.298	-0.657	0.06	6.396	-1.69	0.1	0.1	-4.955	PCI domain-containing protein, putative	NA
5436	PF3D7_1450600	Pf3D7_14_v3	2075586	-	1764	-0.364	-0.802	0.074	4.451	-1.69	0.1	0.1	-4.763	S-adenosylmethionine-dependent methyltransferase, putative	NA
1545	PF3D7_0624600	Pf3D7_06_v3	999524	+	8160	-0.281	-0.619	0.057	10.838	-1.691	0.1	0.1	-5.26	SNF2 helicase, putative	ISWI
1843	PF3D7_0721300	Pf3D7_07_v3	922285	+	2700	-0.29	-0.639	0.059	8.449	-1.688	0.101	0.101	-5.124	ATP-dependent RNA helicase DBP7, putative	DBP7
5218	PF3D7_1428900	Pf3D7_14_v3	1134854	-	4338	0.476	-0.098	1.05	2.236	1.687	0.101	0.101	-4.601	conserved Plasmodium protein, unknown function	NA
637	PF3D7_0319100	Pf3D7_03_v3	802260	-	324	-0.5	-1.105	0.104	4.541	-1.684	0.101	0.101	-4.784	E3 ubiquitin-protein ligase RBX1, putative	RBX1
484	PF3D7_0304200	Pf3D7_03_v3	207342	-	1578	-0.435	-0.96	0.09	7.048	-1.685	0.101	0.101	-5.019	EH domain-containing protein	EHD
3910	PF3D7_1228300	Pf3D7_12_v3	1148111	+	3351	0.558	-0.114	1.23	2.442	1.687	0.101	0.101	-4.584	NIMA related kinase 1	NEK1
328	PF3D7_0212300	Pf3D7_02_v3	492616	+	1691	-0.198	-0.438	0.041	8.576	-1.685	0.101	0.101	-5.137	peptide chain release factor subunit 1, putative	NA
1649	PF3D7_0702000	Pf3D7_07_v3	84797	+	878	0.649	-0.133	1.431	8.349	1.693	0.101	0.101	-5.073	Plasmodium exported protein (hyp12), unknown function	NA
3611	PF3D7_1149100	Pf3D7_11_v3	1972400	+	1475	-0.454	-1.002	0.093	8.548	-1.689	0.101	0.101	-5.144	Plasmodium exported protein, unknown function	NA
3612	PF3D7_1149100	Pf3D7_11_v3	1972400	+	1475	-0.454	-1.002	0.093	8.548	-1.689	0.101	0.101	-5.144	Plasmodium exported protein, unknown function	NA
339	PF3D7_0213400	Pf3D7_02_v3	541811	+	1997	0.601	-0.124	1.326	1.387	1.686	0.101	0.101	-4.524	protein kinase 7	PK7
4588	PF3D7_1340000	Pf3D7_13_v3	1601698	-	1857	0.378	-0.077	0.833	5.429	1.688	0.101	0.101	-4.858	secreted ookinete protein, putative	PSOP7
524	PF3D7_0308200	Pf3D7_03_v3	362342	-	1892	-0.2	-0.441	0.041	8.584	-1.686	0.101	0.101	-5.138	T-complex protein 1 subunit eta	CCT7
4128	PF3D7_1249900	Pf3D7_12_v3	2041293	-	1920	0.325	-0.068	0.718	7.291	1.682	0.102	0.102	-5.047	apicoplast dimethyladenosine synthase, putative	NA
3146	PF3D7_1103700	Pf3D7_11_v3	160115	+	738	-0.321	-0.71	0.067	6.59	-1.68	0.102	0.102	-4.988	casein kinase II beta chain	CK2beta1
2745	PF3D7_1005400	Pf3D7_10_v3	234795	-	951	-0.619	-1.37	0.131	-2.169	-1.679	0.102	0.102	-4.363	conserved Plasmodium protein, unknown function	NA
3471	PF3D7_1135400	Pf3D7_11_v3	1384378	-	738	-0.313	-0.692	0.066	6.558	-1.679	0.102	0.102	-5.01	conserved Plasmodium protein, unknown function	NA
1084	PF3D7_0512500	Pf3D7_05_v3	539731	-	2863	0.573	-0.12	1.266	3.12	1.68	0.102	0.102	-4.693	conserved Plasmodium protein, unknown function	NA
1714	PF3D7_0708400	Pf3D7_07_v3	381592	+	3023	-0.306	-0.676	0.065	12.73	-1.679	0.102	0.102	-5.364	heat shock protein 90	HSP90
2636	PF3D7_0932500	Pf3D7_09_v3	1293832	-	2813	0.741	-0.155	1.637	-0.689	1.683	0.102	0.102	-4.41	palmitoyltransferase DHHC6, putative	DHHC6
1792	PF3D7_0716100	Pf3D7_07_v3	707699	-	3210	-0.256	-0.567	0.054	8.687	-1.68	0.102	0.102	-5.152	protein SDA1, putative	SDA1
2263	PF3D7_0829900	Pf3D7_08_v3	1275625	+	3171	1.316	-0.277	2.909	8.572	1.696	0.102	0.102	-5.164	unspecified product	NA
664	PF3D7_0321800	Pf3D7_03_v3	912916	+	8121	-0.307	-0.678	0.064	7.685	-1.682	0.102	0.102	-5.086	WD repeat-containing protein, putative	NA
4471	PF3D7_1328500	Pf3D7_13_v3	1204186	-	3015	-0.786	-1.739	0.167	5.562	-1.684	0.103	0.103	-4.916	alpha/beta-hydrolase, putative	NA
752	PF3D7_0405600	Pf3D7_04_v3	303329	+	2015	0.312	-0.066	0.69	4.702	1.678	0.103	0.103	-4.839	conserved Plasmodium membrane protein, unknown function	NA
1166	PF3D7_0520700	Pf3D7_05_v3	845843	-	2925	-0.334	-0.738	0.071	4.622	-1.678	0.103	0.103	-4.798	conserved Plasmodium protein, unknown function	NA
184	PF3D7_0114200	Pf3D7_01_v3	550576	-	1138	0.823	-0.176	1.823	-3.255	1.675	0.103	0.103	-4.342	exported protein family 3	EPF3
1109	PF3D7_0515000	Pf3D7_05_v3	620810	-	2547	-0.273	-0.604	0.058	8.399	-1.676	0.103	0.103	-5.144	pre-mRNA-splicing factor CWC2, putative	CWC2
4594	PF3D7_1340600	Pf3D7_13_v3	1618001	-	1728	-0.521	-1.155	0.112	5.992	-1.675	0.103	0.103	-4.972	RNA lariat debranching enzyme, putative	DBR1
1406	PF3D7_0611200	Pf3D7_06_v3	467481	+	1162	0.768	-0.163	1.698	-1.42	1.677	0.103	0.103	-4.394	transcription factor with AP2 domain(s), putative	ApiAP2
658	PF3D7_0321200	Pf3D7_03_v3	886962	-	2015	0.732	-0.155	1.618	-1.675	1.678	0.103	0.103	-4.399	UDP-N-acetylglucosamine--dolichyl-phosphate N-acetylglucosaminephosphotransferase, putative	ALG7
4061	PF3D7_1243300	Pf3D7_12_v3	1816069	-	380	-0.719	-1.594	0.156	-1.812	-1.67	0.104	0.104	-4.381	conserved Plasmodium protein, unknown function	NA
109	PF3D7_0106600	Pf3D7_01_v3	279115	+	900	-0.563	-1.247	0.121	0.939	-1.674	0.104	0.104	-4.509	conserved Plasmodium protein, unknown function	NA
2403	PF3D7_0909600	Pf3D7_09_v3	433238	-	2136	-0.528	-1.169	0.114	3.185	-1.673	0.104	0.104	-4.672	conserved Plasmodium protein, unknown function	NA
3222	PF3D7_1111200	Pf3D7_11_v3	439698	-	1983	-0.315	-0.699	0.069	5.016	-1.67	0.104	0.104	-4.866	conserved Plasmodium protein, unknown function	NA
534	PF3D7_0309200	Pf3D7_03_v3	389137	-	5468	0.376	-0.081	0.833	7.027	1.672	0.104	0.104	-5.07	serine/threonine protein kinase, putative	ARK2
5624	PF3D7_1469200	Pf3D7_14_v3	2838913	-	1077	-0.512	-1.136	0.111	1.273	-1.671	0.104	0.104	-4.534	shewanella-like protein phosphatase 1, putative	SHLP1
5010	PF3D7_1408900	Pf3D7_14_v3	351025	-	1023	-0.326	-0.722	0.07	5.882	-1.673	0.104	0.104	-4.937	tRNA-dihydrouridine synthase, putative	NA
4518	PF3D7_1333000	Pf3D7_13_v3	1355285	+	1910	0.308	-0.068	0.684	5.673	1.668	0.105	0.105	-4.961	20 kDa chaperonin	CPN20
4510	PF3D7_1332200	Pf3D7_13_v3	1332299	+	3294	-0.533	-1.183	0.117	1.669	-1.667	0.105	0.105	-4.565	conserved Plasmodium protein, unknown function	NA
3378	PF3D7_1126500	Pf3D7_11_v3	1033062	+	4107	-0.26	-0.578	0.058	8.367	-1.665	0.105	0.105	-5.154	conserved Plasmodium protein, unknown function	NA
2033	PF3D7_0807000	Pf3D7_08_v3	370784	+	1840	0.338	-0.074	0.751	6.144	1.667	0.105	0.105	-4.988	gas41 homologue, putative	NA
4069	PF3D7_1244100	Pf3D7_12_v3	1847677	+	4480	0.309	-0.068	0.686	6.648	1.668	0.105	0.105	-5.056	N-alpha-acetyltransferase 15, NatA auxiliary subunit, putative	NA
1260	PF3D7_0529900	Pf3D7_05_v3	1220777	-	1216	-0.237	-0.525	0.052	7.646	-1.667	0.105	0.105	-5.098	RING zinc finger protein, putative	NA
2196	PF3D7_0823200	Pf3D7_08_v3	1022629	-	1218	-0.269	-0.596	0.059	9.042	-1.668	0.105	0.105	-5.191	RNA-binding protein, putative	NA
3166	PF3D7_1105600	Pf3D7_11_v3	241184	-	2334	-0.326	-0.724	0.072	8.859	-1.664	0.105	0.105	-5.189	translocon component PTEX88	PTEX88
1699	PF3D7_0707000	Pf3D7_07_v3	327865	+	73	-0.741	-1.646	0.164	-1.222	-1.666	0.105	0.105	-4.4	tRNA Lysine	NA
4148	PF3D7_1251900	Pf3D7_12_v3	2112878	+	73	-1.058	-2.347	0.232	-3.295	-1.668	0.105	0.105	-4.348	tRNA Valine	NA
3326	PF3D7_1121300	Pf3D7_11_v3	801945	-	5137	-0.7	-1.553	0.153	-1.092	-1.668	0.105	0.105	-4.414	tyrosine kinase-like protein	TKL2
4946	PF3D7_1402700	Pf3D7_14_v3	94980	-	3425	-0.257	-0.57	0.056	7.198	-1.668	0.105	0.105	-5.089	U2 snRNP-associated SURP motif-containing protein, putative	SR140
4315	PF3D7_1313000	Pf3D7_13_v3	553752	-	500	0.42	-0.092	0.931	1.943	1.667	0.105	0.105	-4.59	ubiquitin-like protein nedd8 homologue, putative	Nedd8
297	PF3D7_0209300	Pf3D7_02_v3	387273	+	879	0.515	-0.116	1.146	2.477	1.66	0.106	0.106	-4.64	2C-methyl-D-erythritol 2,4-cyclodiphosphate synthase	IspF
3309	PF3D7_1119600	Pf3D7_11_v3	738513	-	3159	-0.263	-0.586	0.059	7.136	-1.659	0.106	0.106	-5.079	ATP-dependent zinc metalloprotease FTSH, putative	NA
3082	PF3D7_1038300	Pf3D7_10_v3	1512190	-	2227	0.792	-0.176	1.76	-2.945	1.663	0.106	0.106	-4.361	conserved Plasmodium protein, unknown function	NA
1759	PF3D7_0712800	Pf3D7_07_v3	581386	-	7538	-0.66	-1.469	0.149	4.767	-1.661	0.106	0.106	-4.853	erythrocyte membrane protein 1, PfEMP1	VAR
919	PF3D7_0422200	Pf3D7_04_v3	1004462	-	12786	0.311	-0.07	0.692	8.284	1.659	0.106	0.106	-5.165	erythrocyte membrane-associated antigen	NA
3095	PF3D7_1039800	Pf3D7_10_v3	1594503	-	775	-0.661	-1.47	0.147	-1.561	-1.663	0.106	0.106	-4.392	exported protein family 3	EPF3
3807	PF3D7_1217900	Pf3D7_12_v3	700531	+	1681	0.374	-0.083	0.832	3.617	1.664	0.106	0.106	-4.769	PPPDE peptidase domain-containing protein, putative	NA
3786	PF3D7_1215900	Pf3D7_12_v3	641552	+	1968	-0.357	-0.795	0.08	5.077	-1.66	0.106	0.106	-4.875	serpentine receptor, putative	SR10
1103	PF3D7_0514400	Pf3D7_05_v3	603951	-	73	-1.039	-2.312	0.233	-2.608	-1.661	0.106	0.106	-4.373	tRNA Phenylalanine	NA
3509	PF3D7_1139000	Pf3D7_11_v3	1546288	+	1182	-0.966	-2.15	0.218	-1.266	-1.66	0.106	0.106	-4.425	unspecified product	NA
2461	PF3D7_0915400	Pf3D7_09_v3	650585	-	4257	-0.279	-0.622	0.063	11.462	-1.658	0.107	0.107	-5.345	6-phosphofructokinase	PFK9
4273	PF3D7_1309000	Pf3D7_13_v3	415916	-	1083	-0.337	-0.752	0.077	7.062	-1.654	0.107	0.107	-5.08	conserved Plasmodium protein, unknown function	NA
4761	PF3D7_1357300	Pf3D7_13_v3	2274713	+	366	-0.83	-1.848	0.188	-1.463	-1.657	0.107	0.107	-4.418	dynein light chain, putative	NA
749	PF3D7_0405300	Pf3D7_04_v3	282403	-	5895	-0.376	-0.838	0.086	5.178	-1.657	0.107	0.107	-4.889	liver specific protein 2, putative	LISP2
2386	PF3D7_0908000	Pf3D7_09_v3	369870	-	1685	-0.92	-2.049	0.21	2.641	-1.66	0.107	0.107	-4.698	P1 nuclease, putative	NA
4964	PF3D7_1404500	Pf3D7_14_v3	153139	+	1407	-0.251	-0.559	0.057	7.559	-1.656	0.107	0.107	-5.11	rRNA biogenesis protein RRP5, putative	RRP5
3725	PF3D7_1209900	Pf3D7_12_v3	448772	-	2568	0.632	-0.146	1.41	0.894	1.652	0.108	0.108	-4.573	ABC transporter B family member 7, putative	ABCB7
1901	PF3D7_0727200	Pf3D7_07_v3	1156748	-	1662	-0.274	-0.611	0.063	7.308	-1.653	0.108	0.108	-5.084	cysteine desulfurase, putative	NFS
3635	PF3D7_1201000	Pf3D7_12_v3	76846	-	2222	0.747	-0.175	1.67	6.555	1.656	0.108	0.108	-5.065	Plasmodium exported protein (PHISTb), unknown function	NA
195	PF3D7_0115150	Pf3D7_01_v3	589386	-	609	-0.887	-1.98	0.206	-1.994	-1.65	0.108	0.108	-4.407	Plasmodium exported protein, unknown function, pseudogene	NA
2102	PF3D7_0813700	Pf3D7_08_v3	671157	-	4260	0.4	-0.093	0.893	4.593	1.649	0.109	0.109	-4.851	ABC transporter F family member 1, putative	ABCF1
4677	PF3D7_1348900	Pf3D7_13_v3	1965963	-	360	-0.387	-0.865	0.091	2.665	-1.647	0.109	0.109	-4.677	conserved Plasmodium protein, unknown function	NA
4240	PF3D7_1305700	Pf3D7_13_v3	277139	+	591	1.048	-0.245	2.341	-1.597	1.648	0.109	0.109	-4.425	conserved Plasmodium protein, unknown function	NA
2913	PF3D7_1021600	Pf3D7_10_v3	871095	+	792	-0.268	-0.598	0.063	5.702	-1.646	0.109	0.109	-4.969	deoxyribose-phosphate aldolase, putative	NA
204	PF3D7_0200300	Pf3D7_02_v3	35927	-	1323	1.099	-0.258	2.456	2.328	1.652	0.109	0.109	-4.626	erythrocyte membrane protein 1 (PfEMP1), exon 2	NA
2540	PF3D7_0923200	Pf3D7_09_v3	944126	+	2343	-0.326	-0.729	0.077	7.365	-1.647	0.109	0.109	-5.119	nitric oxide synthase, putative	NOS
4752	PF3D7_1356400	Pf3D7_13_v3	2235089	+	3021	0.696	-0.164	1.556	-0.834	1.646	0.109	0.109	-4.456	phosphatase 2A regulatory subunit-related protein, putative	NA
3407	PF3D7_1129400	Pf3D7_11_v3	1138075	-	1905	-0.381	-0.852	0.09	8.529	-1.645	0.109	0.109	-5.203	rRNA (cytosine-C(5))-methyltransferase, putative	NOP2
3099	PF3D7_1040200	Pf3D7_10_v3	1605930	+	1024	-1.093	-2.44	0.255	-3.768	-1.649	0.109	0.109	-4.366	stevor	NA
2192	PF3D7_0822800	Pf3D7_08_v3	1005836	+	975	-0.333	-0.745	0.079	5.984	-1.645	0.109	0.109	-4.988	U5 snrnp-specific protein, putative	NA
2392	PF3D7_0908500	Pf3D7_09_v3	389605	-	8239	-0.581	-1.3	0.138	-0.643	-1.643	0.11	0.11	-4.471	conserved Plasmodium protein, unknown function	NA
1250	PF3D7_0529000	Pf3D7_05_v3	1186787	-	2160	-0.276	-0.618	0.066	7.588	-1.641	0.11	0.11	-5.134	conserved Plasmodium protein, unknown function	NA
1018	PF3D7_0506000	Pf3D7_05_v3	256225	+	1154	0.333	-0.079	0.744	5.158	1.643	0.11	0.11	-4.908	conserved Plasmodium protein, unknown function	NA
1898	PF3D7_0726900	Pf3D7_07_v3	1145648	+	1560	0.46	-0.109	1.028	3.571	1.643	0.11	0.11	-4.81	mitochondrial import inner membrane translocase subunit TIM50, putative	TIM50
1472	PF3D7_0617600	Pf3D7_06_v3	738259	-	1007	-0.889	-1.99	0.213	-4.109	-1.64	0.11	0.11	-4.367	stevor	NA
5382	PF3D7_1445200	Pf3D7_14_v3	1856700	+	2609	0.259	-0.062	0.58	8.657	1.639	0.111	0.111	-5.213	ATP-dependent RNA helicase MAK5, putative	MAK5
5210	PF3D7_1428200	Pf3D7_14_v3	1101958	+	2430	-0.278	-0.622	0.067	6.702	-1.638	0.111	0.111	-5.08	major facilitator superfamily domain-containing protein, putative	MFS5
2273	PF3D7_0830900	Pf3D7_08_v3	1317600	-	742	0.722	-0.175	1.619	4.126	1.642	0.111	0.111	-4.879	Plasmodium exported protein, unknown function	NA
653	PF3D7_0320700	Pf3D7_03_v3	865014	+	1407	0.849	-0.206	1.905	0.304	1.636	0.111	0.111	-4.545	signal peptidase complex subunit SPC2, putative	SPC2
1744	PF3D7_0711300	Pf3D7_07_v3	499336	+	360	-0.437	-0.981	0.107	4.119	-1.632	0.112	0.112	-4.819	conserved Plasmodium protein, unknown function	NA
1	mal_mito_1	Pf_M76611	734	-	788	0.862	-0.212	1.937	-1.852	1.632	0.112	0.112	-4.421	cytochrome c oxidase subunit 3	COX3
121	PF3D7_0107800	Pf3D7_01_v3	322371	+	3702	0.514	-0.127	1.155	2.61	1.63	0.112	0.112	-4.709	double-strand break repair protein MRE11	MRE11
1977	PF3D7_0801400	Pf3D7_08_v3	104525	-	364	0.771	-0.189	1.731	-1.446	1.632	0.112	0.112	-4.447	probable protein, unknown function	NA
1140	PF3D7_0518100	Pf3D7_05_v3	753298	+	4247	0.339	-0.083	0.76	4.358	1.635	0.112	0.112	-4.894	RAP protein, putative	NA
2764	PF3D7_1007300	Pf3D7_10_v3	293850	+	2150	-0.709	-1.593	0.175	-2.19	-1.631	0.112	0.112	-4.429	RING zinc finger protein, putative	NA
5034	PF3D7_1411100	Pf3D7_14_v3	447923	-	2046	0.293	-0.073	0.659	4.532	1.629	0.113	0.113	-4.856	conserved Plasmodium membrane protein, unknown function, unspecified product	NA
5035	PF3D7_1411100	Pf3D7_14_v3	447923	-	2046	0.293	-0.073	0.659	4.532	1.629	0.113	0.113	-4.856	conserved Plasmodium membrane protein, unknown function, unspecified product	NA
1017	PF3D7_0505900	Pf3D7_05_v3	254473	-	1045	0.318	-0.08	0.716	5.342	1.625	0.113	0.113	-4.963	conserved Plasmodium protein, unknown function	NA
5317	PF3D7_1438700	Pf3D7_14_v3	1564575	+	3265	0.502	-0.125	1.128	3.559	1.627	0.113	0.113	-4.763	DNA primase small subunit	NA
1574	PF3D7_0627300	Pf3D7_06_v3	1097300	-	1350	-0.295	-0.663	0.074	8.331	-1.627	0.113	0.113	-5.213	E3 ubiquitin-protein ligase RNF5, putative	RNF5
1880	PF3D7_0725000	Pf3D7_07_v3	1058933	-	4044	0.569	-0.143	1.281	4.762	1.626	0.113	0.113	-4.909	exonuclease I, putative	NA
3043	PF3D7_1034400	Pf3D7_10_v3	1367294	-	1896	0.809	-0.202	1.82	-1.459	1.627	0.113	0.113	-4.457	flavoprotein subunit of succinate dehydrogenase	SDHA
3033	PF3D7_1033400	Pf3D7_10_v3	1339762	+	867	-0.261	-0.587	0.065	9.304	-1.626	0.113	0.113	-5.279	haloacid dehalogenase-like hydrolase	HAD1
5381	PF3D7_1445100	Pf3D7_14_v3	1851656	-	3399	-0.411	-0.924	0.103	7.882	-1.627	0.113	0.113	-5.187	histidine--tRNA ligase, putative	NA
4618	PF3D7_1343000	Pf3D7_13_v3	1696894	+	1220	-0.302	-0.68	0.076	10.635	-1.626	0.113	0.113	-5.346	phosphoethanolamine N-methyltransferase	PMT
3388	PF3D7_1127500	Pf3D7_11_v3	1067197	+	3023	0.653	-0.163	1.469	0.2	1.628	0.113	0.113	-4.558	protein disulfide-isomerase, putative	NA
331	PF3D7_0212600	Pf3D7_02_v3	522931	+	1069	-0.523	-1.175	0.13	1.139	-1.628	0.113	0.113	-4.594	secreted protein with altered thrombospondin repeat domain	SPATR
4893	PF3D7_1370800	Pf3D7_13_v3	2796119	+	1026	1.018	-0.257	2.293	5.357	1.635	0.113	0.113	-5.019	unspecified product	NA
2061	PF3D7_0809800	Pf3D7_08_v3	502338	-	4361	-0.744	-1.676	0.188	0.023	-1.622	0.114	0.114	-4.541	conserved Plasmodium protein, unknown function	NA
1908	PF3D7_0727900	Pf3D7_07_v3	1184401	+	5772	-0.343	-0.774	0.087	5.648	-1.621	0.114	0.114	-4.989	conserved Plasmodium protein, unknown function	NA
776	PF3D7_0408100	Pf3D7_04_v3	397328	+	3366	-0.291	-0.656	0.073	6.537	-1.625	0.114	0.114	-5.062	conserved Plasmodium protein, unknown function	NA
1156	PF3D7_0519700	Pf3D7_05_v3	817066	+	2074	-0.264	-0.595	0.067	9.411	-1.624	0.114	0.114	-5.283	conserved Plasmodium protein, unknown function	NA
342	PF3D7_0213700	Pf3D7_02_v3	557048	+	649	-0.452	-1.019	0.114	3.537	-1.624	0.114	0.114	-4.808	conserved protein, unknown function	NA
5698	PF3D7_1476700	Pf3D7_14_v3	3156976	+	1062	1.013	-0.256	2.282	0.995	1.626	0.114	0.114	-4.563	lysophospholipase, putative	NA
2682	PF3D7_0937100	Pf3D7_09_v3	1468546	-	872	-0.672	-1.513	0.17	-1.731	-1.623	0.114	0.114	-4.455	Plasmodium exported protein, unknown function	NA
289	PF3D7_0208600	Pf3D7_02_v3	354621	+	1497	0.62	-0.156	1.397	2.114	1.625	0.114	0.114	-4.685	ribosome-recycling factor	RRF1
5492	PF3D7_1456100	Pf3D7_14_v3	2301456	-	1389	0.856	-0.217	1.929	-3.625	1.622	0.114	0.114	-4.403	serine hydroxymethyltransferase, putative	SHMT
3386	PF3D7_1127300	Pf3D7_11_v3	1063670	-	882	0.322	-0.081	0.725	5.852	1.623	0.114	0.114	-5.031	tRNA (guanine-N(7)-)-methyltransferase, putative	NA
5561	PF3D7_1462900	Pf3D7_14_v3	2561069	-	2424	-0.306	-0.691	0.079	4.708	-1.618	0.115	0.115	-4.91	conserved Plasmodium protein, unknown function	NA
3991	PF3D7_1236300	Pf3D7_12_v3	1520327	+	1278	0.55	-0.142	1.243	1.665	1.617	0.115	0.115	-4.655	conserved Plasmodium protein, unknown function	NA
3261	PF3D7_1115000	Pf3D7_11_v3	570017	+	698	0.575	-0.147	1.297	0.945	1.619	0.115	0.115	-4.576	conserved Plasmodium protein, unknown function	NA
4591	PF3D7_1340300	Pf3D7_13_v3	1607323	+	2868	-0.276	-0.623	0.071	10.346	-1.619	0.115	0.115	-5.34	nucleolar complex protein 2, putative	NA
4854	PF3D7_1366600	Pf3D7_13_v3	2663422	-	1731	-0.221	-0.498	0.056	7.935	-1.621	0.115	0.115	-5.199	signal recognition particle receptor subunit alpha, putative	SRPR-alpha
4252	PF3D7_1306900	Pf3D7_13_v3	323472	+	1561	-0.238	-0.537	0.061	6.749	-1.616	0.115	0.115	-5.099	U1 small nuclear ribonucleoprotein A, putative	SNRPA
2472	PF3D7_0916500	Pf3D7_09_v3	691568	-	2003	0.505	-0.129	1.138	2.96	1.619	0.115	0.115	-4.727	ubiquitin fusion degradation protein 1	UFD1
83	PF3D7_0104100	Pf3D7_01_v3	178087	+	2704	1.164	-0.305	2.633	0.466	1.615	0.116	0.116	-4.551	conserved Plasmodium membrane protein, unknown function	NA
5092	PF3D7_1416700	Pf3D7_14_v3	681055	-	969	0.995	-0.259	2.249	-3.208	1.614	0.116	0.116	-4.427	conserved Plasmodium protein, unknown function	NA
4023	PF3D7_1239500	Pf3D7_12_v3	1648667	+	3021	0.655	-0.17	1.479	-0.752	1.615	0.116	0.116	-4.506	DNA gyrase subunit B	GyrB
3452	PF3D7_1133700	Pf3D7_11_v3	1302173	+	3815	-0.374	-0.845	0.098	12.301	-1.615	0.116	0.116	-5.449	FHA domain-containing protein, putative	NA
1745	PF3D7_0711400	Pf3D7_07_v3	500408	-	2187	0.525	-0.137	1.188	4.193	1.612	0.116	0.116	-4.939	histone deacetylase complex subunit SAP18, putative	SAP18
4666	PF3D7_1347800	Pf3D7_13_v3	1911507	+	1326	0.603	-0.156	1.362	0.367	1.616	0.116	0.116	-4.551	leucine-rich repeat protein	LRR4.1
88	PF3D7_0104600	Pf3D7_01_v3	206170	+	4020	0.496	-0.131	1.124	2.864	1.608	0.117	0.117	-4.751	conserved Plasmodium protein, unknown function	NA
1878	PF3D7_0724800	Pf3D7_07_v3	1047427	-	1936	0.494	-0.131	1.119	2.92	1.608	0.117	0.117	-4.744	kelch domain-containing protein, putative	NA
578	PF3D7_0313500	Pf3D7_03_v3	548718	+	2736	-0.463	-1.049	0.123	3.801	-1.607	0.117	0.117	-4.85	Ras-like G protein	PfG
1110	PF3D7_0515100	Pf3D7_05_v3	624719	-	1763	0.414	-0.109	0.937	2.927	1.608	0.117	0.117	-4.757	rhomboid protease ROM9	ROM9
4070	PF3D7_1244200	Pf3D7_12_v3	1852844	-	2838	-0.316	-0.714	0.083	6.824	-1.61	0.117	0.117	-5.129	RNA polymerase II transcription factor B subunit 2, putative	TFB2
3603	PF3D7_1148500	Pf3D7_11_v3	1922656	+	273	1.063	-0.281	2.407	0.017	1.612	0.117	0.117	-4.577	unspecified product	NA
1445	PF3D7_0614900	Pf3D7_06_v3	617762	+	3775	0.505	-0.135	1.145	0.982	1.605	0.118	0.118	-4.607	conserved Plasmodium membrane protein, unknown function	NA
844	PF3D7_0414700	Pf3D7_04_v3	660624	+	1896	0.612	-0.163	1.386	0.971	1.606	0.118	0.118	-4.626	GTP-binding protein, putative	NA
1758	PF3D7_0712700	Pf3D7_07_v3	577945	+	135	-0.732	-1.659	0.194	-4.533	-1.607	0.118	0.118	-4.403	Plasmodium RNA of unknown function RUF6	NA
884	PF3D7_0418700	Pf3D7_04_v3	841196	+	1710	-0.281	-0.638	0.075	7.826	-1.604	0.118	0.118	-5.207	RNA-binding protein NOB1, putative	NA
5791	PF3D7_API05900	Pf3D7_API_v3	29347	-	1423	-1.316	-2.986	0.355	-1.902	-1.604	0.118	0.118	-4.456	small subunit ribosomal RNA	NA
3351	PF3D7_1123800	Pf3D7_11_v3	940527	+	3807	0.441	-0.117	0.999	2.886	1.606	0.118	0.118	-4.738	structural maintenance of chromosomes protein 5, putative	SMC5
1366	PF3D7_0607300	Pf3D7_06_v3	304638	+	1405	0.6	-0.159	1.359	0.201	1.607	0.118	0.118	-4.57	uroporphyrinogen III decarboxylase	UROD
3147	PF3D7_1103800	Pf3D7_11_v3	163985	+	10116	0.534	-0.146	1.214	5.613	1.599	0.119	0.119	-5.058	CCR4-NOT transcription complex subunit 1, putative	NOT1
2761	PF3D7_1007000	Pf3D7_10_v3	284577	+	1726	0.361	-0.098	0.819	3.639	1.598	0.119	0.119	-4.871	conserved membrane protein, unknown function	NA
3956	PF3D7_1232800	Pf3D7_12_v3	1350645	-	639	0.689	-0.186	1.563	-0.596	1.601	0.119	0.119	-4.536	conserved Plasmodium protein, unknown function	NA
1385	PF3D7_0609100	Pf3D7_06_v3	388915	-	1834	0.309	-0.084	0.702	7.986	1.599	0.119	0.119	-5.221	zinc transporter ZIP1, putative	ZIP1
3217	PF3D7_1110700	Pf3D7_11_v3	428362	+	1686	0.458	-0.125	1.042	2.41	1.597	0.12	0.12	-4.71	actin-like protein, putative	ALP1
1100	PF3D7_0514100	Pf3D7_05_v3	591338	-	4326	0.508	-0.139	1.154	0.569	1.596	0.12	0.12	-4.618	ATP-dependent DNA helicase UvrD	UvrD
2918	PF3D7_1022100	Pf3D7_10_v3	925280	-	951	-0.206	-0.469	0.056	7.043	-1.597	0.12	0.12	-5.153	conserved Plasmodium protein, unknown function	NA
87	PF3D7_0104500	Pf3D7_01_v3	204622	-	834	0.392	-0.108	0.892	6.163	1.595	0.12	0.12	-5.108	conserved protein, unknown function	NA
1318	PF3D7_0602500	Pf3D7_06_v3	105503	+	1140	0.355	-0.097	0.808	4.369	1.596	0.12	0.12	-4.906	geranylgeranyltransferase, putative	NA
69	PF3D7_0102700	Pf3D7_01_v3	124517	+	968	0.612	-0.168	1.392	4.692	1.597	0.12	0.12	-4.892	merozoite-associated tryptophan-rich antigen	MaTrA
4158	PF3D7_1252900	Pf3D7_12_v3	2162707	-	439	0.997	-0.277	2.271	5.042	1.601	0.12	0.12	-4.911	Plasmodium exported protein, unknown function	NA
3884	PF3D7_1225700	Pf3D7_12_v3	1039410	-	4506	-0.241	-0.547	0.066	8.085	-1.596	0.12	0.12	-5.244	VAC14 domain-containing protein, putative	NA
576	PF3D7_0313300	Pf3D7_03_v3	544055	-	1140	0.519	-0.145	1.183	1.968	1.591	0.121	0.121	-4.717	apicoplast conserved ycf19 protein precursor, unknown function	NA
2936	PF3D7_1023900	Pf3D7_10_v3	997475	-	9987	0.459	-0.128	1.047	10.804	1.595	0.121	0.121	-5.41	chromodomain-helicase-DNA-binding protein 1 homolog, putative	CHD1
5648	PF3D7_1471600	Pf3D7_14_v3	2926134	+	3540	-0.896	-2.04	0.248	-1.516	-1.592	0.121	0.121	-4.51	conserved Plasmodium protein, unknown function	NA
5122	PF3D7_1419700	Pf3D7_14_v3	820068	+	1530	-0.202	-0.46	0.056	10.462	-1.593	0.121	0.121	-5.383	conserved Plasmodium protein, unknown function	NA
1726	PF3D7_0709500	Pf3D7_07_v3	428723	+	624	0.78	-0.218	1.778	0.512	1.59	0.121	0.121	-4.594	conserved Plasmodium protein, unknown function	NA
4018	PF3D7_1239000	Pf3D7_12_v3	1621237	-	2469	-0.26	-0.592	0.072	6.591	-1.593	0.121	0.121	-5.137	HD superfamily phosphohydrolase protein	NA
16	malmito_rna_1	Pf_M76611	506	-	88	-0.701	-1.596	0.195	-4.266	-1.591	0.121	0.121	-4.424	unspecified product	RNA1
4413	PF3D7_1322700	Pf3D7_13_v3	958219	-	957	-0.735	-1.676	0.206	-3.08	-1.588	0.122	0.122	-4.458	conserved Plasmodium protein, unknown function	NA
5395	PF3D7_1446500	Pf3D7_14_v3	1907197	+	9006	-0.275	-0.627	0.077	8.19	-1.588	0.122	0.122	-5.265	conserved Plasmodium protein, unknown function	NA
4408	PF3D7_1322200	Pf3D7_13_v3	931314	+	12512	0.637	-0.179	1.453	3.682	1.587	0.122	0.122	-4.843	conserved Plasmodium protein, unknown function	NA
580	PF3D7_0313700	Pf3D7_03_v3	555035	-	3650	0.905	-0.255	2.064	-2.666	1.587	0.122	0.122	-4.476	conserved Plasmodium protein, unknown function, unspecified product	NA
581	PF3D7_0313700	Pf3D7_03_v3	555035	-	3650	0.905	-0.255	2.064	-2.666	1.587	0.122	0.122	-4.476	conserved Plasmodium protein, unknown function, unspecified product	NA
3487	PF3D7_1136800	Pf3D7_11_v3	1449690	-	1761	-0.279	-0.638	0.079	5.409	-1.585	0.122	0.122	-5.033	DnaJ protein, putative	NA
5461	PF3D7_1453100	Pf3D7_14_v3	2176837	-	1893	0.683	-0.193	1.559	-1.538	1.585	0.122	0.122	-4.5	dynactin subunit 4, putative	NA
2677	PF3D7_0936600	Pf3D7_09_v3	1446929	+	1019	-1.049	-2.395	0.298	6.353	-1.596	0.122	0.122	-5.094	gametocyte exported protein 5	GEXP5
5275	PF3D7_1434600	Pf3D7_14_v3	1404312	+	1887	-0.286	-0.651	0.08	8.411	-1.588	0.122	0.122	-5.272	methionine aminopeptidase 2	METAP2
2219	PF3D7_0825500	Pf3D7_08_v3	1098484	+	1893	-0.226	-0.515	0.064	9.25	-1.586	0.122	0.122	-5.325	protein KRI1, putative	KRI1
2787	PF3D7_1009600	Pf3D7_10_v3	386976	+	1467	0.521	-0.147	1.189	1.644	1.586	0.122	0.122	-4.7	protein phosphatase, putative	NA
1147	PF3D7_0518800	Pf3D7_05_v3	783638	-	1354	1.005	-0.282	2.292	-2.536	1.588	0.122	0.122	-4.469	secreted ookinete protein, putative	PSOP13
98	PF3D7_0105500	Pf3D7_01_v3	228485	-	1035	-0.832	-1.9	0.236	-1.885	-1.584	0.123	0.123	-4.498	conserved Plasmodium protein, unknown function	NA
5517	PF3D7_1458600	Pf3D7_14_v3	2406668	+	3492	-0.319	-0.729	0.091	7.213	-1.584	0.123	0.123	-5.192	conserved Plasmodium protein, unknown function	NA
2168	PF3D7_0820400	Pf3D7_08_v3	922208	+	1725	0.558	-0.159	1.274	2.597	1.583	0.123	0.123	-4.742	conserved Plasmodium protein, unknown function	NA
2070	PF3D7_0810700	Pf3D7_08_v3	546163	-	1203	0.651	-0.185	1.487	3.556	1.585	0.123	0.123	-4.879	conserved Plasmodium protein, unknown function	NA
225	PF3D7_0202400	Pf3D7_02_v3	120524	+	3579	-1.083	-2.479	0.312	7.68	-1.592	0.123	0.123	-5.233	gamete antigen 27/25, putative	NA
2923	PF3D7_1022600	Pf3D7_10_v3	948477	+	2676	-0.214	-0.49	0.061	8.776	-1.583	0.123	0.123	-5.303	kelch domain-containing protein, putative	NA
1679	PF3D7_0705000	Pf3D7_07_v3	246259	-	3894	-0.297	-0.679	0.085	9.779	-1.581	0.123	0.123	-5.366	mRNA cap guanine-N7 methyltransferase, putative	NA
4204	PF3D7_1302300	Pf3D7_13_v3	126611	-	531	-0.473	-1.081	0.135	4.17	-1.582	0.123	0.123	-4.887	Plasmodium exported protein, unknown function	NA
211	PF3D7_0201000	Pf3D7_02_v3	57344	-	1078	-0.905	-2.068	0.258	-2.025	-1.582	0.123	0.123	-4.487	rifin	RIF
746	PF3D7_0405000	Pf3D7_04_v3	268960	-	2175	-0.218	-0.498	0.063	7.046	-1.577	0.124	0.124	-5.192	ATP-dependent RNA helicase DDX51, putative	DDX51
5197	PF3D7_1427000	Pf3D7_14_v3	1051085	+	3510	0.517	-0.149	1.182	2.776	1.579	0.124	0.124	-4.77	conserved Plasmodium protein, unknown function	NA
3024	PF3D7_1032500	Pf3D7_10_v3	1306241	-	1292	-0.405	-0.926	0.116	4.277	-1.579	0.124	0.124	-4.95	DER1-like protein, putative	Der1-2
5259	PF3D7_1433000	Pf3D7_14_v3	1298639	-	339	-0.259	-0.593	0.075	5.359	-1.576	0.124	0.124	-5.024	H/ACA ribonucleoprotein complex subunit 3, putative	NOP10
474	PF3D7_0303200	Pf3D7_03_v3	169571	+	4730	0.403	-0.117	0.923	4.507	1.577	0.124	0.124	-5.002	HAD superfamily protein, putative	NA
3263	PF3D7_1115200	Pf3D7_11_v3	576773	+	3504	0.318	-0.092	0.729	7.563	1.577	0.124	0.124	-5.245	histone-lysine N-methyltransferase SET7	SET7
1439	PF3D7_0614300	Pf3D7_06_v3	597484	-	3034	0.333	-0.096	0.762	8.452	1.578	0.124	0.124	-5.314	major facilitator superfamily-related transporter, putative	MFR1
947	PF3D7_0425000	Pf3D7_04_v3	1129660	-	1234	0.772	-0.223	1.767	0.658	1.578	0.124	0.124	-4.614	Plasmodium exported protein, unknown function, pseudogene	NA
1450	PF3D7_0615400	Pf3D7_06_v3	630956	-	9219	-0.314	-0.719	0.091	10.557	-1.579	0.124	0.124	-5.411	ribonuclease, putative	NA
854	PF3D7_0415700	Pf3D7_04_v3	691131	-	1386	0.757	-0.22	1.734	-2.675	1.575	0.125	0.125	-4.485	conserved Plasmodium protein, unknown function	NA
3264	PF3D7_1115300	Pf3D7_11_v3	581250	-	1449	-0.312	-0.715	0.091	7.222	-1.575	0.125	0.125	-5.22	cysteine proteinase falcipain 2b	FP2B
4517	PF3D7_1332900	Pf3D7_13_v3	1350042	-	3819	-0.23	-0.528	0.068	9.188	-1.572	0.125	0.125	-5.351	isoleucine--tRNA ligase, putative	NA
4634	PF3D7_1344600	Pf3D7_13_v3	1789425	+	1248	-0.526	-1.207	0.155	0.237	-1.571	0.125	0.125	-4.597	lipoyl synthase	LipA
4458	PF3D7_1327200	Pf3D7_13_v3	1143157	+	759	-0.308	-0.707	0.09	5.688	-1.572	0.125	0.125	-5.075	ribonuclease P protein subunit RPR2, putative	RPR2
811	PF3D7_0411500	Pf3D7_04_v3	517722	+	72	-0.732	-1.677	0.214	-4.25	-1.573	0.125	0.125	-4.45	tRNA Alanine	NA
2121	PF3D7_0815700	Pf3D7_08_v3	733279	-	1295	0.704	-0.205	1.612	-0.033	1.575	0.125	0.125	-4.583	ubiquitin	Ub
4481	PF3D7_1329500	Pf3D7_13_v3	1252059	+	5915	-0.273	-0.626	0.08	10.922	-1.57	0.126	0.126	-5.443	conserved Plasmodium protein, unknown function	NA
2503	PF3D7_0919600	Pf3D7_09_v3	800703	+	1434	0.867	-0.256	1.99	-1.91	1.57	0.126	0.126	-4.511	dolichyl-diphosphooligosaccharide--protein glycosyltransferase, putative	NA
4989	PF3D7_1406800	Pf3D7_14_v3	246380	-	1342	0.684	-0.201	1.57	-0.274	1.571	0.126	0.126	-4.589	glideosome associated protein with multiple membrane spans 3	GAPM3
3905	PF3D7_1227800	Pf3D7_12_v3	1134370	-	3279	-0.333	-0.764	0.099	9.07	-1.569	0.126	0.126	-5.344	histone S-adenosyl methyltransferase, putative	NA
4428	PF3D7_1324200	Pf3D7_13_v3	1000100	-	1783	-0.264	-0.605	0.078	8.755	-1.57	0.126	0.126	-5.319	micro-fibrillar-associated protein, putative	NA
4718	PF3D7_1352900	Pf3D7_13_v3	2114157	-	2055	0.899	-0.267	2.065	6.873	1.578	0.126	0.126	-5.121	Plasmodium exported protein, unknown function	NA
319	PF3D7_0211400	Pf3D7_02_v3	459072	-	2447	0.775	-0.233	1.783	-3.545	1.564	0.127	0.127	-4.474	beta-ketoacyl-ACP synthase III	KASIII
1101	PF3D7_0514200	Pf3D7_05_v3	596818	+	2604	-0.359	-0.826	0.107	4.744	-1.565	0.127	0.127	-5.014	conserved Plasmodium protein, unknown function	NA
3237	PF3D7_1112700	Pf3D7_11_v3	481851	+	3981	0.514	-0.154	1.182	1.078	1.565	0.127	0.127	-4.675	conserved Plasmodium protein, unknown function	NA
4304	PF3D7_1312000	Pf3D7_13_v3	511396	+	1212	-0.556	-1.278	0.166	2.156	-1.567	0.127	0.127	-4.756	malonyl CoA-acyl carrier protein transacylase	MCAT
3054	PF3D7_1035500	Pf3D7_10_v3	1407276	+	1116	0.506	-0.151	1.164	3.716	1.567	0.127	0.127	-4.876	merozoite surface protein 6	MSP6
1092	PF3D7_0513300	Pf3D7_05_v3	569182	-	738	-0.587	-1.352	0.177	7.898	-1.569	0.127	0.127	-5.265	purine nucleoside phosphorylase	PNP
5363	PF3D7_1443300	Pf3D7_14_v3	1776010	+	653	0.349	-0.104	0.801	6.82	1.567	0.127	0.127	-5.199	U6 snRNA-associated Sm-like protein LSm5, putative	LSM5
4134	PF3D7_1250500	Pf3D7_12_v3	2070094	+	980	0.403	-0.122	0.928	2.326	1.56	0.128	0.128	-4.787	AP-3 complex subunit sigma, putative	NA
3423	PF3D7_1130800	Pf3D7_11_v3	1187604	+	1959	0.63	-0.19	1.449	0.767	1.563	0.128	0.128	-4.663	armadillo repeat protein PF16, putative	NA
1459	PF3D7_0616300	Pf3D7_06_v3	676888	-	684	-0.321	-0.738	0.097	4.175	-1.562	0.128	0.128	-4.921	conserved Plasmodium protein, unknown function	NA
4245	PF3D7_1306200	Pf3D7_13_v3	289564	-	1437	0.769	-0.233	1.77	-3.779	1.561	0.128	0.128	-4.475	conserved Plasmodium protein, unknown function	NA
2985	PF3D7_1028800	Pf3D7_10_v3	1183487	-	509	0.891	-0.271	2.052	-2.36	1.559	0.128	0.128	-4.513	conserved Plasmodium protein, unknown function	NA
606	PF3D7_0316100	Pf3D7_03_v3	648635	+	897	0.749	-0.226	1.724	-0.058	1.562	0.128	0.128	-4.611	mitochondrial ribosomal protein L27 precursor, putative	NA
5574	PF3D7_1464200	Pf3D7_14_v3	2598842	-	1113	-0.268	-0.619	0.082	5.334	-1.559	0.128	0.128	-5.036	zinc finger protein, putative	NA
1742	PF3D7_0711100	Pf3D7_07_v3	492519	-	714	-0.368	-0.849	0.113	5.243	-1.557	0.129	0.129	-5.032	conserved Plasmodium membrane protein, unknown function	NA
1541	PF3D7_0624200	Pf3D7_06_v3	985047	-	1824	0.43	-0.132	0.991	1.56	1.555	0.129	0.129	-4.713	conserved Plasmodium protein, unknown function	NA
4184	PF3D7_1300300	Pf3D7_13_v3	33959	-	10784	0.846	-0.26	1.953	4.257	1.561	0.129	0.129	-4.928	erythrocyte membrane protein 1, PfEMP1	VAR
1152	PF3D7_0519300	Pf3D7_05_v3	795527	+	1947	-0.437	-1.008	0.134	2.695	-1.556	0.129	0.129	-4.823	protoheme IX farnesyltransferase, putative	COX10
4486	PF3D7_1330000	Pf3D7_13_v3	1272213	+	1647	0.386	-0.119	0.892	4.821	1.554	0.129	0.129	-5.016	thioredoxin, putative	NA
4487	PF3D7_1330000	Pf3D7_13_v3	1272213	+	1647	0.386	-0.119	0.892	4.821	1.554	0.129	0.129	-5.016	thioredoxin, putative	NA
3373	PF3D7_1126000	Pf3D7_11_v3	1014334	-	3042	-0.252	-0.582	0.078	9.977	-1.555	0.129	0.129	-5.417	threonine--tRNA ligase	ThrRS
1010	PF3D7_0505200	Pf3D7_05_v3	230695	+	1698	0.444	-0.138	1.025	2.421	1.552	0.13	0.13	-4.827	actin-like protein, putative	ALP2b
1503	PF3D7_0620500	Pf3D7_06_v3	855160	+	1953	-0.258	-0.595	0.08	6.485	-1.553	0.13	0.13	-5.171	cleavage stimulation factor subunit 1, putative	NA
3325	PF3D7_1121200	Pf3D7_11_v3	800781	-	678	0.618	-0.193	1.429	0.118	1.551	0.13	0.13	-4.615	conserved Plasmodium protein, unknown function	NA
4285	PF3D7_1310100	Pf3D7_13_v3	450398	+	3018	0.769	-0.239	1.776	-1.072	1.551	0.13	0.13	-4.58	conserved Plasmodium protein, unknown function	NA
1432	PF3D7_0613600	Pf3D7_06_v3	554457	+	3772	0.776	-0.239	1.792	-1.712	1.554	0.13	0.13	-4.558	conserved Plasmodium protein, unknown function	NA
1501	PF3D7_0620300	Pf3D7_06_v3	848405	-	2460	0.816	-0.254	1.886	-1.463	1.551	0.13	0.13	-4.546	conserved Plasmodium protein, unknown function	NA
2217	PF3D7_0825300	Pf3D7_08_v3	1095116	-	447	0.502	-0.156	1.161	2.837	1.552	0.13	0.13	-4.831	conserved protein, unknown function	NA
1976	PF3D7_0801300	Pf3D7_08_v3	101954	-	873	0.597	-0.186	1.381	1.462	1.551	0.13	0.13	-4.726	von Willebrand factor A domain-related protein	WARP
2739	PF3D7_1004800	Pf3D7_10_v3	221945	+	1486	0.531	-0.167	1.229	2.981	1.547	0.131	0.131	-4.915	ADP/ATP carrier protein, putative	NA
590	PF3D7_0314500	Pf3D7_03_v3	584226	+	943	-0.242	-0.56	0.076	7.51	-1.548	0.131	0.131	-5.275	conserved Plasmodium protein, unknown function	NA
4960	PF3D7_1404100	Pf3D7_14_v3	145134	-	516	0.326	-0.102	0.753	5.445	1.547	0.131	0.131	-5.122	cytochrome c, putative	NA
333	PF3D7_0212800	Pf3D7_02_v3	528249	+	3675	0.807	-0.252	1.866	0.394	1.55	0.131	0.131	-4.678	multidrug efflux pump, putative	MATE
500	PF3D7_0305800	Pf3D7_03_v3	281916	+	3345	-0.406	-0.938	0.127	4.235	-1.548	0.131	0.131	-4.964	P-loop containing nucleoside triphosphate hydrolase, putative	NA
2179	PF3D7_0821500	Pf3D7_08_v3	967901	-	840	-0.296	-0.684	0.093	6.184	-1.547	0.131	0.131	-5.149	ribosomal RNA small subunit methyltransferase NEP1, putative	NEP1
189	PF3D7_0114700	Pf3D7_01_v3	563703	-	1140	0.782	-0.244	1.808	-0.354	1.55	0.131	0.131	-4.616	rifin	RIF
1549	PF3D7_0625000	Pf3D7_06_v3	1020024	+	1852	0.675	-0.211	1.562	-1.768	1.549	0.131	0.131	-4.549	sphingomyelin synthase 1, putative	SMS1
1550	PF3D7_0625000	Pf3D7_06_v3	1020024	+	1852	0.675	-0.211	1.562	-1.768	1.549	0.131	0.131	-4.549	sphingomyelin synthase 1, putative	SMS1
4447	PF3D7_1326100	Pf3D7_13_v3	1087584	+	1516	0.277	-0.087	0.641	5.147	1.548	0.131	0.131	-5.086	WD repeat-containing protein, putative	NA
5686	PF3D7_1475500	Pf3D7_14_v3	3106949	+	4863	-0.602	-1.395	0.191	-0.282	-1.543	0.132	0.132	-4.629	LCCL domain-containing protein	CCp1
1352	PF3D7_0605900	Pf3D7_06_v3	247640	+	1527	0.696	-0.221	1.612	6.522	1.55	0.132	0.132	-5.134	long chain polyunsaturated fatty acid elongation enzyme, putative	NA
5304	PF3D7_1437400	Pf3D7_14_v3	1517070	+	2301	0.311	-0.099	0.721	3.825	1.543	0.132	0.132	-4.947	pantothenate kinase, putative	NA
4828	PF3D7_1364000	Pf3D7_13_v3	2564625	+	2484	-0.408	-0.948	0.131	2.56	-1.539	0.133	0.133	-4.795	conserved Plasmodium protein, unknown function	NA
3691	PF3D7_1206600	Pf3D7_12_v3	294997	-	4353	-0.229	-0.532	0.074	9.19	-1.538	0.133	0.133	-5.396	DNA-directed RNA polymerase III subunit RPC2, putative	RPC2
1075	PF3D7_0511700	Pf3D7_05_v3	519129	+	950	0.401	-0.128	0.929	3.938	1.541	0.133	0.133	-4.944	EKC/KEOPS complex subunit CGI121	CGI121
4473	PF3D7_1328700	Pf3D7_13_v3	1213394	+	222	-0.484	-1.123	0.156	2.333	-1.539	0.133	0.133	-4.786	Plasmodium RNA of unknown function RUF1	NA
1815	PF3D7_0718500	Pf3D7_07_v3	824445	+	1440	0.438	-0.14	1.017	4.781	1.541	0.133	0.133	-5.067	prefoldin subunit 3, putative	NA
4028	PF3D7_1240000	Pf3D7_12_v3	1682835	+	1626	-0.26	-0.604	0.084	6.7	-1.537	0.134	0.134	-5.205	3-hydroxyisobutyryl-coenzyme A hydrolase, putative	NA
1734	PF3D7_0710300	Pf3D7_07_v3	472501	-	1041	0.36	-0.116	0.835	3.617	1.538	0.134	0.134	-4.929	conserved Plasmodium membrane protein, unknown function	NA
1666	PF3D7_0703700	Pf3D7_07_v3	146645	-	750	-0.267	-0.621	0.086	7.393	-1.537	0.134	0.134	-5.275	conserved Plasmodium protein, unknown function	NA
1353	PF3D7_0606000	Pf3D7_06_v3	250612	-	3192	-0.246	-0.571	0.079	10.092	-1.537	0.134	0.134	-5.447	conserved Plasmodium protein, unknown function	NA
2412	PF3D7_0910500	Pf3D7_09_v3	482461	-	5094	-0.305	-0.709	0.099	5.537	-1.535	0.134	0.134	-5.102	DNA repair protein REV1, putative	NA
1811	PF3D7_0718000	Pf3D7_07_v3	776141	-	19497	0.582	-0.189	1.353	2.076	1.536	0.134	0.134	-4.767	dynein heavy chain, putative	NA
3503	PF3D7_1138400	Pf3D7_11_v3	1501011	-	12681	-0.495	-1.151	0.16	2.485	-1.537	0.134	0.134	-4.802	guanylyl cyclase	GCalpha
351	PF3D7_0214600	Pf3D7_02_v3	594196	+	5145	-0.44	-1.024	0.143	1.741	-1.536	0.134	0.134	-4.771	serine/threonine protein kinase, putative	NA
1281	PF3D7_0531900	Pf3D7_05_v3	1292211	+	199	-1.051	-2.443	0.34	-0.067	-1.539	0.134	0.134	-4.63	unspecified product	NA
3492	PF3D7_1137300	Pf3D7_11_v3	1466197	-	2070	-0.272	-0.632	0.089	8.068	-1.533	0.135	0.135	-5.329	CLPTM1 domain-containing protein, putative	NA
4787	PF3D7_1359900	Pf3D7_13_v3	2395974	+	6381	-0.356	-0.829	0.117	6.754	-1.53	0.135	0.135	-5.232	conserved Plasmodium membrane protein, unknown function	NA
4995	PF3D7_1407400	Pf3D7_14_v3	268108	-	585	0.277	-0.091	0.644	4.606	1.532	0.135	0.135	-5.003	conserved Plasmodium protein, unknown function	NA
4688	PF3D7_1350000	Pf3D7_13_v3	2003332	-	1803	0.357	-0.116	0.831	1.689	1.533	0.135	0.135	-4.742	conserved Plasmodium protein, unknown function	NA
3966	PF3D7_1233800	Pf3D7_12_v3	1405182	-	787	0.467	-0.153	1.086	2.023	1.531	0.135	0.135	-4.771	conserved Plasmodium protein, unknown function	NA
5675	PF3D7_1474400	Pf3D7_14_v3	3044129	+	11120	0.627	-0.205	1.459	2.549	1.533	0.135	0.135	-4.807	conserved Plasmodium protein, unknown function	NA
2074	PF3D7_0811000	Pf3D7_08_v3	554437	+	2769	0.586	-0.192	1.365	-0.647	1.532	0.135	0.135	-4.612	cullin-1, putative	CUL1
2534	PF3D7_0922600	Pf3D7_09_v3	916603	+	2072	-0.263	-0.611	0.086	9.421	-1.533	0.135	0.135	-5.415	glutamine synthetase, putative	NA
2602	PF3D7_0929200	Pf3D7_09_v3	1167842	+	1736	-0.216	-0.504	0.071	8.608	-1.531	0.135	0.135	-5.367	RNA-binding protein, putative	NA
4870	PF3D7_1368200	Pf3D7_13_v3	2713463	-	1974	-0.276	-0.644	0.091	8.066	-1.528	0.136	0.136	-5.344	ABC transporter E family member 1, putative	ABCE1
3532	PF3D7_1141200	Pf3D7_11_v3	1657507	-	472	0.602	-0.2	1.404	-0.864	1.527	0.136	0.136	-4.633	conserved Apicomplexan protein, unknown function	NA
1424	PF3D7_0613000	Pf3D7_06_v3	533907	-	1458	0.562	-0.185	1.309	1.449	1.53	0.136	0.136	-4.732	conserved Plasmodium protein, unknown function	NA
1425	PF3D7_0613000	Pf3D7_06_v3	533907	-	1458	0.562	-0.185	1.309	1.449	1.53	0.136	0.136	-4.732	conserved Plasmodium protein, unknown function	NA
1426	PF3D7_0613000	Pf3D7_06_v3	533907	-	1458	0.562	-0.185	1.309	1.449	1.53	0.136	0.136	-4.732	conserved Plasmodium protein, unknown function	NA
3699	PF3D7_1207400	Pf3D7_12_v3	345922	+	1318	0.873	-0.29	2.036	1.202	1.528	0.136	0.136	-4.705	conserved Plasmodium protein, unknown function	NA
1812	PF3D7_0718100	Pf3D7_07_v3	796514	-	8226	0.861	-0.285	2.006	-1.075	1.528	0.136	0.136	-4.6	exported serine/threonine protein kinase	EST
5290	PF3D7_1436000	Pf3D7_14_v3	1458131	+	1740	0.263	-0.087	0.613	8.092	1.528	0.136	0.136	-5.365	glucose-6-phosphate isomerase	GPI
2613	PF3D7_0930300	Pf3D7_09_v3	1201812	+	5163	0.729	-0.24	1.698	1.658	1.529	0.136	0.136	-4.751	merozoite surface protein 1	MSP1
187	PF3D7_0114500	Pf3D7_01_v3	558201	-	508	1.229	-0.412	2.87	0.561	1.531	0.136	0.136	-4.774	Plasmodium exported protein (hyp10), unknown function	NA
2709	PF3D7_1001900	Pf3D7_10_v3	99379	-	983	-0.412	-0.961	0.137	7.678	-1.526	0.136	0.136	-5.299	Plasmodium exported protein (hyp16), unknown function	PfJ23
463	PF3D7_0302100	Pf3D7_03_v3	114070	+	4017	-0.323	-0.752	0.107	8.039	-1.528	0.136	0.136	-5.351	serine/threonine protein kinase	SRPK1
4037	PF3D7_1240900	Pf3D7_12_v3	1735543	+	7866	-0.749	-1.75	0.252	4.869	-1.528	0.137	0.137	-5.07	erythrocyte membrane protein 1, PfEMP1	VAR
4261	PF3D7_1307800	Pf3D7_13_v3	348743	-	2046	0.344	-0.115	0.803	7.003	1.523	0.137	0.137	-5.276	fork head domain protein, putative	NA
5658	PF3D7_1472600	Pf3D7_14_v3	2962986	-	2101	-0.55	-1.284	0.183	-1.671	-1.525	0.137	0.137	-4.592	protein disulfide-isomerase	PDI-14
798	PF3D7_0410200	Pf3D7_04_v3	469858	-	73	-0.755	-1.762	0.251	-2.223	-1.526	0.137	0.137	-4.545	tRNA Isoleucine	NA
3964	PF3D7_1233600	Pf3D7_12_v3	1385707	+	16512	0.292	-0.099	0.682	8.168	1.518	0.138	0.138	-5.355	asparagine and aspartate rich protein 1	AARP1
2159	PF3D7_0819500	Pf3D7_08_v3	881590	+	2801	0.565	-0.191	1.322	2.052	1.519	0.138	0.138	-4.838	conserved protein, unknown function	NA
3833	PF3D7_1220500	Pf3D7_12_v3	818703	-	957	-0.343	-0.802	0.116	4.469	-1.521	0.138	0.138	-5.014	ribosome biogenesis protein TSR3, putative	TSR3
4301	PF3D7_1311700	Pf3D7_13_v3	497534	-	480	-0.37	-0.866	0.127	5.376	-1.515	0.139	0.139	-5.138	cytochrome c2 precursor, putative	NA
5642	PF3D7_1471000	Pf3D7_14_v3	2902134	+	1404	-0.223	-0.522	0.076	6.529	-1.515	0.139	0.139	-5.23	RNA 3'-terminal phosphate cyclase-like protein, putative	RCL1
5343	PF3D7_1441300	Pf3D7_14_v3	1681791	+	7367	0.593	-0.202	1.388	3.905	1.517	0.139	0.139	-4.953	serine/threonine protein kinase, putative	NA
1403	PF3D7_0610900	Pf3D7_06_v3	456747	-	3843	-0.266	-0.623	0.091	8.911	-1.516	0.139	0.139	-5.41	transcription elongation factor SPT5, putative	SPT5
3507	PF3D7_1138800	Pf3D7_11_v3	1533252	-	6605	-0.256	-0.599	0.088	9.009	-1.515	0.139	0.139	-5.415	WD repeat-containing protein, putative	NA
3604	PF3D7_1148600	Pf3D7_11_v3	1925995	+	2150	-0.89	-2.089	0.309	1.941	-1.513	0.14	0.14	-4.79	18S ribosomal RNA	NA
2559	PF3D7_0925000	Pf3D7_09_v3	1012118	+	1746	0.773	-0.267	1.814	-1.046	1.512	0.14	0.14	-4.615	conserved Plasmodium protein, unknown function	NA
5206	PF3D7_1427800	Pf3D7_14_v3	1088362	-	741	-0.323	-0.759	0.112	4.952	-1.512	0.14	0.14	-5.089	exosome complex exonuclease RRP41, putative	RRP41
3020	PF3D7_1032100	Pf3D7_10_v3	1293499	+	3573	-0.231	-0.54	0.079	8.686	-1.513	0.14	0.14	-5.398	mRNA-decapping enzyme subunit 1, putative	DCP1
5448	PF3D7_1451800	Pf3D7_14_v3	2123461	+	3139	-0.51	-1.196	0.177	5.757	-1.513	0.14	0.14	-5.209	sortilin	NA
372	PF3D7_0216700	Pf3D7_02_v3	690311	+	5473	0.501	-0.175	1.177	5.593	1.508	0.141	0.141	-5.139	autophagy-related protein 11, putative	ATG11
373	PF3D7_0216700	Pf3D7_02_v3	690311	+	5473	0.501	-0.175	1.177	5.593	1.508	0.141	0.141	-5.139	autophagy-related protein 11, putative	ATG11
2360	PF3D7_0905700	Pf3D7_09_v3	284200	-	2441	0.285	-0.099	0.668	4.926	1.509	0.141	0.141	-5.083	autophagy-related protein 3, putative	ATG3
2361	PF3D7_0905700	Pf3D7_09_v3	284200	-	2441	0.285	-0.099	0.668	4.926	1.509	0.141	0.141	-5.083	autophagy-related protein 3, putative	ATG3
2362	PF3D7_0905700	Pf3D7_09_v3	284200	-	2441	0.285	-0.099	0.668	4.926	1.509	0.141	0.141	-5.083	autophagy-related protein 3, putative	ATG3
2688	PF3D7_0937700	Pf3D7_09_v3	1492373	+	1336	-0.839	-1.971	0.292	2.122	-1.51	0.141	0.141	-4.801	rifin	RIF
198	PF3D7_0115400	Pf3D7_01_v3	598465	+	1008	-0.852	-2.001	0.297	-3.553	-1.508	0.141	0.141	-4.541	stevor	NA
823	PF3D7_0412700	Pf3D7_04_v3	561667	-	7676	-0.674	-1.585	0.237	4.879	-1.508	0.142	0.142	-5.092	erythrocyte membrane protein 1, PfEMP1	VAR
2201	PF3D7_0823700	Pf3D7_08_v3	1041832	-	496	0.346	-0.122	0.814	4.264	1.504	0.142	0.142	-5.061	mitochondrial import receptor subunit TOM7, putative	TOM7
3827	PF3D7_1219900	Pf3D7_12_v3	796500	+	684	0.402	-0.142	0.947	2.993	1.503	0.142	0.142	-4.945	ribulose-phosphate 3-epimerase, putative	NA
5311	PF3D7_1438100	Pf3D7_14_v3	1541359	-	1514	-0.217	-0.511	0.077	6.919	-1.503	0.142	0.142	-5.297	secretory complex protein 62	SEC62
3723	PF3D7_1209700	Pf3D7_12_v3	445625	+	1644	0.52	-0.185	1.225	1.935	1.5	0.143	0.143	-4.846	conserved Plasmodium protein, unknown function	NA
1615	PF3D7_0631400	Pf3D7_06_v3	1318327	-	790	0.862	-0.306	2.03	-1.011	1.501	0.143	0.143	-4.633	Pfmc-2TM Maurer's cleft two transmembrane protein	MC-2TM
4450	PF3D7_1326400	Pf3D7_13_v3	1095553	-	2912	-0.244	-0.574	0.087	6.839	-1.5	0.143	0.143	-5.281	translation initiation factor eIF-2B subunit gamma, putative	NA
4564	PF3D7_1337600	Pf3D7_13_v3	1524111	-	82	-0.748	-1.764	0.267	-4.167	-1.498	0.143	0.143	-4.54	tRNA Serine	NA
4311	PF3D7_1312600	Pf3D7_13_v3	529976	+	1290	-0.814	-1.919	0.292	-1.255	-1.497	0.144	0.144	-4.647	2-oxoisovalerate dehydrogenase subunit alpha, mitochondrial, putative	BCKDHA
1725	PF3D7_0709400	Pf3D7_07_v3	423236	-	3999	0.81	-0.292	1.911	0.349	1.495	0.144	0.144	-4.736	Cg7 protein	NA
1862	PF3D7_0723200	Pf3D7_07_v3	972658	+	1615	-0.741	-1.749	0.267	-2.63	-1.494	0.144	0.144	-4.582	conserved Plasmodium protein, unknown function	NA
1798	PF3D7_0716700	Pf3D7_07_v3	728109	+	3018	0.425	-0.153	1.002	3.512	1.496	0.144	0.144	-4.953	conserved Plasmodium protein, unknown function	NA
2015	PF3D7_0805200	Pf3D7_08_v3	290902	+	282	0.899	-0.326	2.125	2.581	1.497	0.144	0.144	-4.837	gamete release protein, putative	GAMER
4669	PF3D7_1348100	Pf3D7_13_v3	1925049	+	1732	0.362	-0.13	0.853	2.533	1.497	0.144	0.144	-4.85	GTPase, putative	NA
4157	PF3D7_1252800	Pf3D7_12_v3	2159573	+	2043	-0.296	-0.698	0.106	5.965	-1.497	0.144	0.144	-5.194	Plasmodium exported protein (PHISTb), unknown function	NA
5730	PF3D7_1479900	Pf3D7_14_v3	3282729	+	1024	-0.956	-2.257	0.345	-3.281	-1.494	0.144	0.144	-4.564	stevor	NA
1528	PF3D7_0622900	Pf3D7_06_v3	925105	-	5970	-0.439	-1.036	0.157	8.657	-1.5	0.144	0.144	-5.422	transcription factor with AP2 domain(s), putative	ApiAP2
4965	PF3D7_1404600	Pf3D7_14_v3	154855	-	5337	0.429	-0.155	1.012	1.673	1.493	0.145	0.145	-4.801	adenylyl cyclase alpha	ACalpha
4966	PF3D7_1404600	Pf3D7_14_v3	154855	-	5337	0.429	-0.155	1.012	1.673	1.493	0.145	0.145	-4.801	adenylyl cyclase alpha	ACalpha
4967	PF3D7_1404600	Pf3D7_14_v3	154855	-	5337	0.429	-0.155	1.012	1.673	1.493	0.145	0.145	-4.801	adenylyl cyclase alpha	ACalpha
1058	PF3D7_0510000	Pf3D7_05_v3	418136	+	3290	-0.499	-1.178	0.181	1.586	-1.493	0.145	0.145	-4.797	conserved Plasmodium protein, unknown function	NA
770	PF3D7_0407500	Pf3D7_04_v3	369885	+	1386	-0.317	-0.748	0.115	3.847	-1.493	0.145	0.145	-4.996	mitochondrial carrier protein, putative	NA
4082	PF3D7_1245400	Pf3D7_12_v3	1894942	+	1026	0.681	-0.248	1.61	1.985	1.491	0.145	0.145	-4.87	mitochondrial ribosomal protein L3 precursor, putative	NA
3537	PF3D7_1141700	Pf3D7_11_v3	1669951	+	1562	0.408	-0.149	0.964	4.226	1.491	0.145	0.145	-5.069	OTU domain-containing protein, putative	NA
4685	PF3D7_1349700	Pf3D7_13_v3	1998815	+	957	0.457	-0.166	1.08	5.118	1.492	0.145	0.145	-5.113	peptidase, putative	NA
2785	PF3D7_1009400	Pf3D7_10_v3	381361	+	1089	-0.325	-0.768	0.118	5.806	-1.493	0.145	0.145	-5.18	zinc finger protein, putative	ZNF2
4942	PF3D7_1402300	Pf3D7_14_v3	85883	-	2001	-0.268	-0.634	0.098	7.033	-1.49	0.146	0.146	-5.329	26S proteasome regulatory subunit RPN6	RPN6
3066	PF3D7_1036800	Pf3D7_10_v3	1448692	-	2955	0.456	-0.167	1.078	1.773	1.488	0.146	0.146	-4.825	acetyl-CoA transporter, putative	NA
3788	PF3D7_1216100	Pf3D7_12_v3	646979	+	882	0.479	-0.176	1.133	0.629	1.488	0.146	0.146	-4.732	conserved Plasmodium membrane protein, unknown function	NA
2479	PF3D7_0917200	Pf3D7_09_v3	716325	+	1182	0.568	-0.207	1.342	-3.509	1.489	0.146	0.146	-4.564	conserved Plasmodium membrane protein, unknown function	NA
3528	PF3D7_1140800	Pf3D7_11_v3	1633920	+	2412	-0.352	-0.834	0.129	6.953	-1.488	0.146	0.146	-5.304	conserved Plasmodium protein, unknown function	NA
5385	PF3D7_1445500	Pf3D7_14_v3	1867616	+	450	0.329	-0.12	0.778	5.863	1.488	0.146	0.146	-5.206	conserved Plasmodium protein, unknown function	NA
4173	PF3D7_1254400	Pf3D7_12_v3	2214671	+	1349	-0.827	-1.958	0.304	0.203	-1.487	0.146	0.146	-4.702	rifin	RIF
3449	PF3D7_1133400	Pf3D7_11_v3	1293856	+	1869	-0.624	-1.478	0.231	2.481	-1.485	0.147	0.147	-4.911	apical membrane antigen 1	AMA1
135	PF3D7_0109200	Pf3D7_01_v3	369480	-	699	-0.401	-0.951	0.148	3.572	-1.485	0.147	0.147	-4.991	cleavage and polyadenylation specificity factor subunit 5, putative	NA
1490	PF3D7_0619200	Pf3D7_06_v3	799397	+	3393	-0.268	-0.635	0.099	9.496	-1.485	0.147	0.147	-5.483	conserved Plasmodium protein, unknown function	NA
3242	PF3D7_1113200	Pf3D7_11_v3	517311	+	675	0.304	-0.112	0.72	5.029	1.485	0.147	0.147	-5.11	conserved Plasmodium protein, unknown function	NA
157	PF3D7_0111400	Pf3D7_01_v3	436408	+	2157	0.713	-0.263	1.689	-1.454	1.486	0.147	0.147	-4.658	conserved Plasmodium protein, unknown function	GEXP19
800	PF3D7_0410400	Pf3D7_04_v3	474542	+	1017	-0.381	-0.903	0.141	5.982	-1.484	0.147	0.147	-5.216	exosome complex component RRP4, putative	RRP4
2281	PF3D7_0831700	Pf3D7_08_v3	1365467	-	2040	-0.399	-0.947	0.149	13.027	-1.487	0.147	0.147	-5.669	heat shock protein 70	HSP70-x
2861	PF3D7_1016600	Pf3D7_10_v3	665658	-	997	-0.328	-0.778	0.122	5.362	-1.483	0.147	0.147	-5.147	Plasmodium exported protein (PHISTc), unknown function	NA
1576	PF3D7_0627500	Pf3D7_06_v3	1101734	-	1119	-0.358	-0.849	0.132	8.047	-1.486	0.147	0.147	-5.401	protein DJ-1	DJ1
4681	PF3D7_1349300	Pf3D7_13_v3	1977269	+	5424	-0.309	-0.732	0.114	5.753	-1.486	0.147	0.147	-5.198	tyrosine kinase-like protein	TKL3
5225	PF3D7_1429600	Pf3D7_14_v3	1167144	+	660	-0.375	-0.889	0.139	2.315	-1.482	0.148	0.148	-4.859	conserved Plasmodium protein, unknown function	GEXP03
4437	PF3D7_1325100	Pf3D7_13_v3	1044552	-	1314	-0.19	-0.452	0.071	10.011	-1.481	0.148	0.148	-5.523	phosphoribosylpyrophosphate synthetase	NA
5117	PF3D7_1419200	Pf3D7_14_v3	797709	-	2427	0.465	-0.174	1.103	3.397	1.48	0.148	0.148	-4.978	thioredoxin-like protein, putative	NA
3141	PF3D7_1103200	Pf3D7_11_v3	143353	+	73	-0.83	-1.971	0.311	-2.217	-1.479	0.148	0.148	-4.608	tRNA Glycine	NA
1328	PF3D7_0603500	Pf3D7_06_v3	139193	+	1326	-0.582	-1.383	0.219	1.869	-1.477	0.149	0.149	-4.854	cation/H+ antiporter	CAX
1605	PF3D7_0630400	Pf3D7_06_v3	1272363	-	1170	-0.616	-1.465	0.233	-3.122	-1.475	0.149	0.149	-4.594	conserved Plasmodium protein, unknown function	NA
5039	PF3D7_1411500	Pf3D7_14_v3	468976	+	3041	-0.267	-0.635	0.1	7.641	-1.478	0.149	0.149	-5.374	conserved Plasmodium protein, unknown function	NA
5362	PF3D7_1443200	Pf3D7_14_v3	1773276	+	1922	0.349	-0.132	0.83	3.261	1.477	0.149	0.149	-4.973	conserved Plasmodium protein, unknown function	NA
4505	PF3D7_1331700	Pf3D7_13_v3	1319089	-	2757	-0.285	-0.678	0.108	7.81	-1.477	0.149	0.149	-5.403	glutamine--tRNA ligase, putative	NA
5282	PF3D7_1435300	Pf3D7_14_v3	1421901	-	9321	-0.393	-0.935	0.148	3.339	-1.477	0.149	0.149	-4.97	NAD(P)H-dependent glutamate synthase, putative	NA
3794	PF3D7_1216700	Pf3D7_12_v3	663061	+	3222	0.359	-0.135	0.854	5.904	1.477	0.149	0.149	-5.216	perforin-like protein 2	PLP2
1635	PF3D7_0700600	Pf3D7_07_v3	43192	-	949	-0.555	-1.32	0.209	-4.583	-1.477	0.149	0.149	-4.558	Plasmodium exported protein, unknown function, pseudogene	NA
3185	PF3D7_1107500	Pf3D7_11_v3	320128	-	1078	0.386	-0.145	0.917	5.128	1.478	0.149	0.149	-5.15	prefoldin, putative	NA
4122	PF3D7_1249300	Pf3D7_12_v3	2012643	+	3084	-0.227	-0.539	0.086	6.706	-1.477	0.149	0.149	-5.301	protein phosphatase PPM4, putative	PPM4
2474	PF3D7_0916700	Pf3D7_09_v3	696863	-	1167	-0.316	-0.752	0.12	9.821	-1.476	0.149	0.149	-5.516	RNA-binding protein musashi, putative	HoMu
3417	PF3D7_1130300	Pf3D7_11_v3	1166588	+	100	-0.467	-1.109	0.175	2.495	-1.478	0.149	0.149	-4.88	small nucleolar RNA snoR13	NA
5455	PF3D7_1452500	Pf3D7_14_v3	2151823	-	1792	0.426	-0.161	1.012	1.447	1.476	0.149	0.149	-4.821	SNARE protein, putative	BET1
5017	PF3D7_1409500	Pf3D7_14_v3	370146	+	2861	0.7	-0.266	1.666	0.713	1.474	0.15	0.15	-4.779	conserved Plasmodium protein, unknown function	NA
4696	PF3D7_1350800	Pf3D7_13_v3	2025366	-	741	-0.786	-1.875	0.302	-1.483	-1.469	0.151	0.151	-4.656	conserved Plasmodium protein, unknown function	NA
1690	PF3D7_0706100	Pf3D7_07_v3	297506	-	5554	0.409	-0.157	0.975	2.535	1.468	0.151	0.151	-4.897	conserved Plasmodium protein, unknown function	NA
3260	PF3D7_1114900	Pf3D7_11_v3	562017	+	7443	0.566	-0.218	1.35	2.173	1.469	0.151	0.151	-4.858	conserved Plasmodium protein, unknown function	NA
4035	PF3D7_1240700	Pf3D7_12_v3	1728774	+	1234	-1.308	-3.117	0.502	-1.855	-1.474	0.151	0.151	-4.628	rifin, pseudogene	RIF
834	PF3D7_0413800	Pf3D7_04_v3	622094	+	843	0.86	-0.334	2.053	-0.99	1.465	0.152	0.152	-4.693	50S ribosomal protein L10, putative	NA
2922	PF3D7_1022500	Pf3D7_10_v3	944398	-	1692	-0.382	-0.913	0.148	5.835	-1.466	0.152	0.152	-5.222	citrate synthase, mitochondrial, putative	CS
2404	PF3D7_0909700	Pf3D7_09_v3	440914	+	3111	-0.26	-0.62	0.101	7.958	-1.464	0.152	0.152	-5.414	FHA domain protein, putative	NA
4780	PF3D7_1359200	Pf3D7_13_v3	2350437	-	2384	0.46	-0.178	1.099	3.022	1.467	0.152	0.152	-4.982	high mobility group protein B4, putative	HMGB4
5490	PF3D7_1455900	Pf3D7_14_v3	2290887	-	1805	0.698	-0.27	1.665	-2.485	1.466	0.152	0.152	-4.628	polyprenol reductase, putative	NA
41	malmito_rna_SSUF	Pf_M76611	5447	-	61	-0.656	-1.567	0.254	-4.533	-1.466	0.152	0.152	-4.572	unspecified product	SSUF
3399	PF3D7_1128500	Pf3D7_11_v3	1107786	+	2157	-0.267	-0.639	0.104	5.591	-1.462	0.153	0.153	-5.208	conserved protein, unknown function	NA
1650	PF3D7_0702100	Pf3D7_07_v3	88685	+	2202	0.961	-0.379	2.3	6.691	1.47	0.153	0.153	-5.259	Plasmodium exported protein (PHISTb), unknown function, pseudogene	NA
4743	PF3D7_1355500	Pf3D7_13_v3	2199594	+	1977	-0.18	-0.43	0.07	7.36	-1.461	0.153	0.153	-5.378	serine/threonine protein phosphatase 5	PP5
516	PF3D7_0307400	Pf3D7_03_v3	321050	-	1113	0.636	-0.25	1.521	0.038	1.459	0.154	0.154	-4.744	ATP-dependent Clp protease proteolytic subunit	ClpP
1602	PF3D7_0630100	Pf3D7_06_v3	1254907	-	2034	-0.539	-1.29	0.212	2.391	-1.46	0.154	0.154	-4.896	conserved Plasmodium protein, unknown function	NA
5660	PF3D7_1472800	Pf3D7_14_v3	2969912	-	1881	-0.457	-1.093	0.18	1.859	-1.459	0.154	0.154	-4.862	conserved Plasmodium protein, unknown function	NA
860	PF3D7_0416300	Pf3D7_04_v3	711092	-	4398	0.517	-0.203	1.237	2.334	1.46	0.154	0.154	-4.918	DNA helicase MCM9, putative	MCM9
1217	PF3D7_0525800	Pf3D7_05_v3	1071247	+	903	-0.622	-1.489	0.246	-1.148	-1.457	0.154	0.154	-4.681	inner membrane complex protein 1g, putative	IMC1g
4901	PF3D7_1371800	Pf3D7_13_v3	2824302	-	1551	0.466	-0.183	1.116	2.226	1.46	0.154	0.154	-4.96	Plasmodium exported protein, unknown function	NA
4383	PF3D7_1319800	Pf3D7_13_v3	820741	+	438	-0.649	-1.554	0.255	-2.674	-1.46	0.154	0.154	-4.626	probable protein, unknown function	NA
5086	PF3D7_1416100	Pf3D7_14_v3	645641	-	2814	-0.287	-0.688	0.114	7.745	-1.458	0.154	0.154	-5.401	protein SEY1, putative	SEY1
4810	PF3D7_1362200	Pf3D7_13_v3	2490386	-	1452	-0.25	-0.6	0.099	6.988	-1.458	0.154	0.154	-5.361	RuvB-like helicase 3	RUVB3
82	PF3D7_0104000	Pf3D7_01_v3	175609	+	768	0.73	-0.287	1.748	-1.745	1.46	0.154	0.154	-4.657	thrombospondin-related sporozoite protein	TRSP
5572	PF3D7_1464000	Pf3D7_14_v3	2592002	-	2118	-0.345	-0.826	0.136	9.06	-1.458	0.154	0.154	-5.496	YL1 nuclear protein, putative	NA
1409	PF3D7_0611500	Pf3D7_06_v3	482825	-	1083	-0.606	-1.453	0.242	-0.069	-1.453	0.155	0.155	-4.761	conserved Plasmodium protein, unknown function	NA
5056	PF3D7_1413100	Pf3D7_14_v3	527132	+	2103	0.64	-0.254	1.533	-3.877	1.456	0.155	0.155	-4.593	conserved Plasmodium protein, unknown function	NA
4674	PF3D7_1348600	Pf3D7_13_v3	1953304	+	1549	0.941	-0.374	2.255	-2.344	1.455	0.155	0.155	-4.638	conserved Plasmodium protein, unknown function	NA
1351	PF3D7_0605800	Pf3D7_06_v3	237811	-	6711	0.347	-0.138	0.831	7.118	1.456	0.155	0.155	-5.339	DNA repair protein RAD50, putative	RAD50
5150	PF3D7_1422300	Pf3D7_14_v3	897980	-	1065	-0.318	-0.764	0.127	3.666	-1.453	0.155	0.155	-5.011	DnaJ protein, putative	NA
5445	PF3D7_1451500	Pf3D7_14_v3	2113561	-	444	-0.299	-0.718	0.119	4.42	-1.454	0.155	0.155	-5.096	pre-mRNA-splicing factor CWF18, putative	NA
555	PF3D7_0311200	Pf3D7_03_v3	474788	+	4299	0.354	-0.14	0.847	3.153	1.457	0.155	0.155	-4.972	valine--tRNA ligase, putative	NA
4631	PF3D7_1344300	Pf3D7_13_v3	1774275	-	4768	0.452	-0.18	1.083	3.413	1.453	0.155	0.155	-5.071	zinc finger protein, putative	NA
2026	PF3D7_0806300	Pf3D7_08_v3	337902	-	5353	-0.489	-1.174	0.196	1.173	-1.452	0.156	0.156	-4.827	ferlin, putative	NA
5214	PF3D7_1428600	Pf3D7_14_v3	1127042	+	1990	0.576	-0.232	1.385	1.075	1.45	0.156	0.156	-4.801	peptide chain release factor 1	RF1
5449	PF3D7_1451900	Pf3D7_14_v3	2128168	-	3090	-0.21	-0.505	0.085	8.508	-1.45	0.156	0.156	-5.474	ribosome biogenesis protein TSR1, putative	TSR1
641	PF3D7_0319500	Pf3D7_03_v3	815569	+	1287	0.233	-0.093	0.56	7.303	1.452	0.156	0.156	-5.39	RNA-binding protein, putative	NA
5568	PF3D7_1463600	Pf3D7_14_v3	2580115	-	372	0.793	-0.32	1.906	-1.414	1.449	0.157	0.157	-4.668	conserved Plasmodium protein, unknown function	NA
1518	PF3D7_0621900	Pf3D7_06_v3	893450	-	2331	-0.215	-0.518	0.087	8.548	-1.448	0.157	0.157	-5.481	signal recognition particle subunit SRP68, putative	SRP68
1251	PF3D7_0529100	Pf3D7_05_v3	1191000	-	683	0.415	-0.167	0.997	1.332	1.449	0.157	0.157	-4.835	thioredoxin-like protein, putative	ATrx2
255	PF3D7_0205300	Pf3D7_02_v3	219690	+	2567	-0.551	-1.326	0.224	-0.854	-1.445	0.158	0.158	-4.703	conserved Plasmodium protein, unknown function	NA
3387	PF3D7_1127400	Pf3D7_11_v3	1065785	+	785	0.38	-0.156	0.916	2.158	1.443	0.158	0.158	-4.945	conserved Plasmodium protein, unknown function	NA
2043	PF3D7_0808000	Pf3D7_08_v3	404996	+	4089	0.383	-0.157	0.923	1.16	1.442	0.158	0.158	-4.842	conserved Plasmodium protein, unknown function	NA
5614	PF3D7_1468200	Pf3D7_14_v3	2802508	+	681	-0.306	-0.737	0.125	5.242	-1.445	0.158	0.158	-5.218	conserved protein, unknown function	NA
5338	PF3D7_1440800	Pf3D7_14_v3	1665463	+	2081	0.591	-0.241	1.423	1.464	1.443	0.158	0.158	-4.908	major facilitator superfamily domain-containing protein, putative	MFS6
2208	PF3D7_0824400	Pf3D7_08_v3	1062304	-	1758	0.59	-0.241	1.421	3.32	1.444	0.158	0.158	-5.008	nucleoside transporter 2	NT2
2817	PF3D7_1012500	Pf3D7_10_v3	478758	-	1782	-0.308	-0.742	0.126	7.015	-1.445	0.158	0.158	-5.372	phosphoglucomutase, putative	NA
2347	PF3D7_0904400	Pf3D7_09_v3	208168	-	558	0.37	-0.152	0.892	1.358	1.443	0.158	0.158	-4.864	signal peptidase complex subunit 3, putative	SPC3
4729	PF3D7_1354000	Pf3D7_13_v3	2155755	-	1788	0.454	-0.187	1.095	1.774	1.44	0.159	0.159	-4.892	conserved Plasmodium protein, unknown function	NA
515	PF3D7_0307300	Pf3D7_03_v3	318804	+	1533	-0.657	-1.584	0.27	1.077	-1.441	0.159	0.159	-4.832	EB1 homolog, putative	NA
5799	PF3D7_API06700	Pf3D7_API_v3	31447	+	2692	-0.958	-2.311	0.396	-1.053	-1.439	0.159	0.159	-4.694	large subunit ribosomal RNA	NA
2166	PF3D7_0820200	Pf3D7_08_v3	912264	-	1986	-0.272	-0.655	0.112	6.718	-1.439	0.159	0.159	-5.366	phosphatidylglycerophosphate synthase	PGPS
758	PF3D7_0406200	Pf3D7_04_v3	329216	+	474	-0.957	-2.311	0.397	7.61	-1.45	0.159	0.159	-5.421	sexual stage-specific protein precursor	Pfs16
391	PF3D7_0218500	Pf3D7_02_v3	752966	+	474	-0.245	-0.59	0.101	5.619	-1.439	0.159	0.159	-5.245	small nuclear ribonucleoprotein Sm D2, putative	SNRPD2
1369	PF3D7_0607600	Pf3D7_06_v3	313856	-	3027	0.755	-0.311	1.82	-1.095	1.441	0.159	0.159	-4.707	spindle assembly abnormal protein 6, putative	SAS6
2512	PF3D7_0920500	Pf3D7_09_v3	841536	+	1120	0.853	-0.356	2.062	-2.022	1.435	0.16	0.16	-4.672	ADP-ribosylation factor, putative	NA
847	PF3D7_0415000	Pf3D7_04_v3	668578	-	1140	-0.411	-0.992	0.17	5.901	-1.438	0.16	0.16	-5.277	arsenical pump-driving ATPase, putative	NA
838	PF3D7_0414200	Pf3D7_04_v3	647389	-	1000	0.648	-0.268	1.564	-3.397	1.438	0.16	0.16	-4.625	calmodulin-like protein	NA
839	PF3D7_0414200	Pf3D7_04_v3	647389	-	1000	0.648	-0.268	1.564	-3.397	1.438	0.16	0.16	-4.625	calmodulin-like protein	NA
4152	PF3D7_1252300	Pf3D7_12_v3	2128400	-	387	0.424	-0.176	1.025	7.585	1.439	0.16	0.16	-5.452	conserved Plasmodium protein, unknown function	NA
5234	PF3D7_1430500	Pf3D7_14_v3	1205088	+	1329	0.685	-0.283	1.654	-0.542	1.439	0.16	0.16	-4.717	conserved Plasmodium protein, unknown function	NA
3924	PF3D7_1229700	Pf3D7_12_v3	1218181	+	586	0.735	-0.304	1.774	-4.021	1.438	0.16	0.16	-4.616	conserved Plasmodium protein, unknown function	NA
2134	PF3D7_0817000	Pf3D7_08_v3	772568	+	1170	0.593	-0.247	1.434	-0.568	1.436	0.16	0.16	-4.746	NEDD8-activating enzyme E1 catalytic subunit, putative	NA
4710	PF3D7_1352100	Pf3D7_13_v3	2076078	-	3150	0.344	-0.144	0.831	5.486	1.433	0.161	0.161	-5.272	ABC transporter B family member 6, putative	ABCB6
916	PF3D7_0421900	Pf3D7_04_v3	997240	+	216	-0.656	-1.587	0.275	-4.286	-1.433	0.161	0.161	-4.614	conserved Plasmodium protein, unknown function	NA
2703	PF3D7_1001300	Pf3D7_10_v3	72934	-	984	-0.55	-1.329	0.23	0.814	-1.434	0.161	0.161	-4.817	Plasmodium exported protein (PHISTa), unknown function	NA
4336	PF3D7_1315100	Pf3D7_13_v3	638286	+	1104	0.434	-0.182	1.049	1.745	1.433	0.161	0.161	-4.88	serine/threonine protein kinase	PK9
1888	PF3D7_0725900	Pf3D7_07_v3	1086372	+	198	-0.831	-2.012	0.349	1.165	-1.434	0.161	0.161	-4.852	unspecified product	NA
809	PF3D7_0411300	Pf3D7_04_v3	510380	+	2169	0.643	-0.272	1.559	0.303	1.429	0.162	0.162	-4.855	conserved Plasmodium protein, unknown function	NA
3098	PF3D7_1040100	Pf3D7_10_v3	1602935	+	1055	1.17	-0.494	2.834	-3.14	1.431	0.162	0.162	-4.64	rifin	RIF
550	PF3D7_0310700	Pf3D7_03_v3	463326	+	949	-0.221	-0.536	0.093	5.205	-1.43	0.162	0.162	-5.223	trafficking protein particle complex subunit 4, putative	NA
3554	PF3D7_1143400	Pf3D7_11_v3	1735126	+	1447	-0.175	-0.423	0.074	7.757	-1.43	0.162	0.162	-5.46	translation initiation factor eIF-1A, putative	NA
32	malmito_rna_RNA11	Pf_M76611	5284	-	57	-0.721	-1.745	0.304	-4.594	-1.43	0.162	0.162	-4.61	unspecified product	RNA11
3494	PF3D7_1137500	Pf3D7_11_v3	1473505	-	612	0.671	-0.286	1.628	-2.418	1.426	0.163	0.163	-4.676	apicoplast ribosomal protein S14p/S29e precursor, putative	NA
1719	PF3D7_0708900	Pf3D7_07_v3	399290	-	954	-0.356	-0.865	0.152	6.046	-1.425	0.163	0.163	-5.302	Cg3 protein	NA
2508	PF3D7_0920100	Pf3D7_09_v3	825336	-	1805	0.402	-0.172	0.976	3.227	1.426	0.163	0.163	-5.053	chaperone, putative	NA
1497	PF3D7_0619900	Pf3D7_06_v3	840523	+	702	-0.303	-0.734	0.128	5.354	-1.428	0.163	0.163	-5.238	splicing factor 3A subunit 2, putative	SF3A2
1698	PF3D7_0706900	Pf3D7_07_v3	326726	-	72	0.915	-0.389	2.22	-2.931	1.427	0.163	0.163	-4.646	tRNA Histidine	NA
2887	PF3D7_1019100	Pf3D7_10_v3	766168	-	5787	-0.604	-1.466	0.258	1.936	-1.424	0.164	0.164	-4.938	conserved Plasmodium protein, unknown function	NA
2499	PF3D7_0919200	Pf3D7_09_v3	789514	-	965	0.756	-0.325	1.837	-1.457	1.422	0.164	0.164	-4.712	PPPDE peptidase, putative	NA
539	PF3D7_0309700	Pf3D7_03_v3	409102	-	1827	0.355	-0.152	0.863	6.806	1.424	0.164	0.164	-5.375	SECIS-binding protein 2, putative	SBP2
1074	PF3D7_0511600	Pf3D7_05_v3	517259	-	627	0.404	-0.175	0.982	3.833	1.418	0.165	0.165	-5.074	apical rhoptry neck protein	ARNP
3861	PF3D7_1223400	Pf3D7_12_v3	941125	+	5621	-0.153	-0.371	0.066	11.581	-1.42	0.165	0.165	-5.69	phospholipid-transporting ATPase, putative	NA
3269	PF3D7_1115800	Pf3D7_11_v3	596289	-	915	-0.273	-0.666	0.119	9.218	-1.417	0.166	0.166	-5.557	conserved Plasmodium protein, unknown function	NA
4030	PF3D7_1240200	Pf3D7_12_v3	1688606	-	2557	-0.604	-1.473	0.264	1.873	-1.414	0.166	0.166	-4.933	erythrocyte membrane protein 1 (PfEMP1), pseudogene	NA
171	PF3D7_0112800	Pf3D7_01_v3	481809	-	810	0.62	-0.272	1.512	4.717	1.416	0.166	0.166	-5.145	Plasmodium exported protein (hyp11), unknown function	NA
404	PF3D7_0219700	Pf3D7_02_v3	783723	-	1106	0.58	-0.255	1.414	6.858	1.418	0.166	0.166	-5.347	Plasmodium exported protein (PHISTc), unknown function	GEXP20
5548	PF3D7_1461600	Pf3D7_14_v3	2498047	-	2338	-0.257	-0.626	0.112	9.246	-1.418	0.166	0.166	-5.563	splicing factor 3B subunit 2, putative	SF3B2
2229	PF3D7_0826500	Pf3D7_08_v3	1152302	+	3981	-0.245	-0.597	0.107	7.858	-1.416	0.166	0.166	-5.477	ubiquitin conjugation factor E4 B, putative	UBE4B
4801	PF3D7_1361400	Pf3D7_13_v3	2464135	-	584	0.854	-0.374	2.082	-2.286	1.414	0.167	0.167	-4.684	actin-depolymerizing factor 2	ADF2
2237	PF3D7_0827300	Pf3D7_08_v3	1181295	+	2502	-0.275	-0.67	0.12	6.823	-1.413	0.167	0.167	-5.39	conserved Plasmodium protein, unknown function	NA
3904	PF3D7_1227700	Pf3D7_12_v3	1128939	-	2748	0.206	-0.091	0.504	8.046	1.412	0.167	0.167	-5.481	conserved Plasmodium protein, unknown function	NA
2174	PF3D7_0821000	Pf3D7_08_v3	948745	+	2155	0.522	-0.23	1.273	2.171	1.412	0.167	0.167	-4.935	conserved Plasmodium protein, unknown function	NA
1865	PF3D7_0723500	Pf3D7_07_v3	984778	-	681	-0.34	-0.83	0.15	3.042	-1.411	0.167	0.167	-5.028	dynactin subunit 5, putative	NA
3383	PF3D7_1127000	Pf3D7_11_v3	1056198	-	1857	1.053	-0.47	2.576	7.979	1.42	0.167	0.167	-5.494	protein phosphatase, putative	NA
893	PF3D7_0419600	Pf3D7_04_v3	870737	+	1137	-0.194	-0.473	0.085	9.995	-1.412	0.167	0.167	-5.616	ran-specific GTPase-activating protein 1, putative	RANBP1
4617	PF3D7_1342900	Pf3D7_13_v3	1682393	-	11577	-0.397	-0.969	0.175	6.215	-1.411	0.167	0.167	-5.362	transcription factor with AP2 domain(s)	ApiAP2
3355	PF3D7_1124200	Pf3D7_11_v3	957514	-	1686	-0.429	-1.048	0.19	3.764	-1.409	0.168	0.168	-5.094	conserved Plasmodium protein, unknown function	NA
2110	PF3D7_0814500	Pf3D7_08_v3	700376	+	2277	-0.295	-0.72	0.131	7.655	-1.409	0.168	0.168	-5.457	conserved Plasmodium protein, unknown function	NA
677	PF3D7_0323100	Pf3D7_03_v3	971166	+	4629	0.45	-0.2	1.1	4.732	1.408	0.168	0.168	-5.256	conserved Plasmodium protein, unknown function	NA
2835	PF3D7_1014300	Pf3D7_10_v3	565805	+	7256	0.525	-0.233	1.282	2.88	1.408	0.168	0.168	-5.018	conserved protein, unknown function	NA
440	PF3D7_0223300	Pf3D7_02_v3	909350	+	1705	0.862	-0.384	2.109	2.138	1.41	0.168	0.168	-4.953	erythrocyte membrane protein 1 (PfEMP1), exon 2	NA
1291	PF3D7_0532900	Pf3D7_05_v3	1326245	+	1185	-0.723	-1.766	0.32	-0.377	-1.41	0.168	0.168	-4.785	rifin	RIF
1126	PF3D7_0516700	Pf3D7_05_v3	694492	+	4287	-0.28	-0.684	0.124	7.954	-1.408	0.168	0.168	-5.497	ubiquitin carboxyl-terminal hydrolase 2, putative	NA
5434	PF3D7_1450400	Pf3D7_14_v3	2059936	-	5835	-0.213	-0.522	0.095	8.16	-1.408	0.168	0.168	-5.512	zinc finger protein, putative	NA
3896	PF3D7_1226900	Pf3D7_12_v3	1088536	-	1488	0.432	-0.192	1.056	0.722	1.407	0.169	0.169	-4.872	conserved Plasmodium protein, unknown function	NA
4194	PF3D7_1301300	Pf3D7_13_v3	78614	-	857	-0.696	-1.705	0.312	3.018	-1.407	0.169	0.169	-5.08	Plasmodium exported protein (PHISTa-like), unknown function, pseudogene	NA
989	PF3D7_0503000	Pf3D7_05_v3	125116	+	1399	0.558	-0.25	1.366	1.939	1.404	0.17	0.17	-4.962	50S ribosomal protein L28, apicoplast, putative	NA
914	PF3D7_0421700	Pf3D7_04_v3	987842	-	6519	-0.846	-2.074	0.382	-3.121	-1.401	0.17	0.17	-4.678	conserved Plasmodium protein, unknown function	NA
4468	PF3D7_1328200	Pf3D7_13_v3	1186619	+	8583	0.4	-0.18	0.981	3.194	1.401	0.17	0.17	-5.051	conserved Plasmodium protein, unknown function	NA
2252	PF3D7_0828800	Pf3D7_08_v3	1237285	-	2217	0.818	-0.368	2.004	-0.759	1.402	0.17	0.17	-4.758	GPI-anchored micronemal antigen	GAMA
2811	PF3D7_1011900	Pf3D7_10_v3	460335	-	1659	0.241	-0.108	0.59	4.763	1.402	0.17	0.17	-5.211	heme oxygenase	HO
2279	PF3D7_0831500	Pf3D7_08_v3	1353456	+	1214	0.227	-0.102	0.556	9.554	1.402	0.17	0.17	-5.598	Plasmodium exported protein (PHIST), unknown function	NA
4797	PF3D7_1361000	Pf3D7_13_v3	2445090	-	2175	-0.32	-0.785	0.144	6.267	-1.403	0.17	0.17	-5.363	protein arginine N-methyltransferase 5, putative	PRMT5
3100	PF3D7_1040300	Pf3D7_10_v3	1609063	+	1360	0.68	-0.305	1.665	0.902	1.403	0.17	0.17	-4.853	rifin	RIF
3170	PF3D7_1106000	Pf3D7_11_v3	255714	-	1428	-0.26	-0.637	0.117	7.468	-1.401	0.17	0.17	-5.473	RuvB-like helicase 2	RUVB2
3646	PF3D7_1202100	Pf3D7_12_v3	113787	+	2137	0.322	-0.144	0.788	6.574	1.404	0.17	0.17	-5.419	SRAP domain-containing protein, putative	NA
3647	PF3D7_1202100	Pf3D7_12_v3	113787	+	2137	0.322	-0.144	0.788	6.574	1.404	0.17	0.17	-5.419	SRAP domain-containing protein, putative	NA
597	PF3D7_0315200	Pf3D7_03_v3	616472	+	6345	-0.697	-1.711	0.316	1.882	-1.399	0.171	0.171	-4.936	circumsporozoite- and TRAP-related protein	CTRP
2527	PF3D7_0921900	Pf3D7_09_v3	888559	+	747	-0.236	-0.579	0.107	9.222	-1.399	0.171	0.171	-5.588	conserved Plasmodium protein, unknown function	NA
5575	PF3D7_1464300	Pf3D7_14_v3	2601441	+	2865	0.315	-0.143	0.772	3.348	1.398	0.171	0.171	-5.055	conserved Plasmodium protein, unknown function	NA
1733	PF3D7_0710200	Pf3D7_07_v3	463105	+	8733	0.518	-0.237	1.273	7.349	1.401	0.171	0.171	-5.473	conserved Plasmodium protein, unknown function	NA
816	PF3D7_0412000	Pf3D7_04_v3	536774	+	2337	0.679	-0.307	1.665	0.41	1.4	0.171	0.171	-4.872	conserved Plasmodium protein, unknown function	NA
191	PF3D7_0114900	Pf3D7_01_v3	572135	-	719	-0.828	-2.03	0.374	-1.636	-1.4	0.171	0.171	-4.723	Plasmodium exported protein, unknown function, pseudogene	NA
3348	PF3D7_1123500	Pf3D7_11_v3	929354	-	4011	-0.261	-0.64	0.119	7.586	-1.395	0.172	0.172	-5.495	conserved Plasmodium protein, unknown function	NA
1418	PF3D7_0612400	Pf3D7_06_v3	521228	+	711	0.712	-0.325	1.749	-3.154	1.397	0.172	0.172	-4.68	conserved Plasmodium protein, unknown function	NA
4934	PF3D7_1401500	Pf3D7_14_v3	57172	-	1122	-0.728	-1.79	0.334	6.055	-1.402	0.172	0.172	-5.355	lysophospholipase, putative	NA
5001	PF3D7_1408000	Pf3D7_14_v3	293471	+	1362	-0.26	-0.639	0.119	7.143	-1.395	0.172	0.172	-5.464	plasmepsin II	NA
123	PF3D7_0108000	Pf3D7_01_v3	328431	-	1128	0.267	-0.122	0.656	7.792	1.397	0.172	0.172	-5.504	proteasome subunit beta type-3, putative	NA
3510	PF3D7_1139100	Pf3D7_11_v3	1548186	+	5376	-0.857	-2.109	0.394	3.868	-1.4	0.172	0.172	-5.142	RNA-binding protein, putative	NA
737	PF3D7_0404100	Pf3D7_04_v3	224779	-	6955	-0.533	-1.309	0.243	-0.757	-1.396	0.172	0.172	-4.788	transcription factor with AP2 domain(s), putative	ApiAP2
5521	PF3D7_1459000	Pf3D7_14_v3	2420764	+	2226	-0.199	-0.49	0.092	10.211	-1.393	0.173	0.173	-5.652	ATP-dependent RNA helicase DBP5	DBP5
3400	PF3D7_1128600	Pf3D7_11_v3	1110436	-	1680	0.709	-0.326	1.744	0.287	1.393	0.173	0.173	-4.829	CCR4-NOT transcription complex subunit 2, putative	NOT2
3282	PF3D7_1117000	Pf3D7_11_v3	646922	-	4422	0.691	-0.318	1.701	-2.226	1.392	0.173	0.173	-4.715	conserved Plasmodium membrane protein, unknown function	NA
1803	PF3D7_0717200	Pf3D7_07_v3	745191	-	1473	0.339	-0.156	0.833	5.629	1.393	0.173	0.173	-5.328	conserved Plasmodium protein, unknown function	NA
1588	PF3D7_0628700	Pf3D7_06_v3	1183896	+	1722	0.34	-0.156	0.836	4.526	1.393	0.173	0.173	-5.204	conserved Plasmodium protein, unknown function	NA
408	PF3D7_0220100	Pf3D7_02_v3	804520	+	3222	-0.275	-0.678	0.127	8.167	-1.391	0.173	0.173	-5.53	DnaJ protein, putative	NA
3322	PF3D7_1120900	Pf3D7_11_v3	790267	+	342	0.559	-0.258	1.376	0.13	1.391	0.173	0.173	-4.819	heat shock factor-binding protein 1	HSBP
1485	PF3D7_0618900	Pf3D7_06_v3	784354	+	3674	-0.563	-1.385	0.259	-0.779	-1.392	0.173	0.173	-4.776	phosphatidylinositol N-acetylglucosaminyltransferase subunit GPI1	GPI1
1486	PF3D7_0618900	Pf3D7_06_v3	784354	+	3674	-0.563	-1.385	0.259	-0.779	-1.392	0.173	0.173	-4.776	phosphatidylinositol N-acetylglucosaminyltransferase subunit GPI1	GPI1
4962	PF3D7_1404300	Pf3D7_14_v3	150000	+	609	-0.598	-1.471	0.275	-1.163	-1.392	0.173	0.173	-4.755	secreted ookinete adhesive protein, putative	SOAP
1520	PF3D7_0622100	Pf3D7_06_v3	898341	-	4023	0.304	-0.141	0.75	4.897	1.388	0.174	0.174	-5.245	conserved Plasmodium protein, unknown function	NA
1839	PF3D7_0720900	Pf3D7_07_v3	901549	+	1239	0.429	-0.199	1.057	2.285	1.389	0.174	0.174	-4.977	conserved Plasmodium protein, unknown function	NA
437	PF3D7_0222900	Pf3D7_02_v3	901494	+	1360	-0.731	-1.802	0.34	1.083	-1.389	0.174	0.174	-4.894	erythrocyte membrane protein 1 (PfEMP1), exon 2, pseudogene	VAR
4532	PF3D7_1334400	Pf3D7_13_v3	1403522	-	930	-0.485	-1.194	0.224	-1.832	-1.391	0.174	0.174	-4.735	MSP7-like protein	MSRP4
4726	PF3D7_1353700	Pf3D7_13_v3	2150068	+	507	0.336	-0.156	0.828	3.638	1.389	0.174	0.174	-5.154	reactive oxygen species modulator 1, putative	ROMO1
4303	PF3D7_1311900	Pf3D7_13_v3	507900	+	1836	-0.275	-0.678	0.128	7.145	-1.389	0.174	0.174	-5.472	V-type proton ATPase catalytic subunit A	vapA
4820	PF3D7_1363200	Pf3D7_13_v3	2539948	-	1593	-0.329	-0.812	0.154	4.49	-1.387	0.175	0.175	-5.221	bifunctional polynucleotide phosphatase/kinase	PNKP
2035	PF3D7_0807200	Pf3D7_08_v3	378024	+	1423	-0.291	-0.719	0.136	5.619	-1.387	0.175	0.175	-5.328	conserved Plasmodium membrane protein, unknown function	NA
4015	PF3D7_1238700	Pf3D7_12_v3	1605107	+	2433	0.556	-0.261	1.372	1.183	1.384	0.175	0.175	-4.954	conserved Plasmodium protein, unknown function	NA
759	PF3D7_0406400	Pf3D7_04_v3	332043	+	1814	-0.324	-0.8	0.152	5.634	-1.385	0.175	0.175	-5.329	cytosolic glyoxalase II	cGloII
217	PF3D7_0201600	Pf3D7_02_v3	77251	-	1558	0.286	-0.134	0.706	8.375	1.385	0.175	0.175	-5.572	PHISTb domain-containing RESA-like protein 1	RLP1
2020	PF3D7_0805700	Pf3D7_08_v3	314172	-	4555	-0.574	-1.416	0.268	0.01	-1.387	0.175	0.175	-4.846	serine/threonine protein kinase, FIKK family	FIKK8
3443	PF3D7_1132800	Pf3D7_11_v3	1271204	+	777	0.551	-0.259	1.361	3.018	1.384	0.176	0.176	-5.107	aquaglyceroporin	AQP
3424	PF3D7_1130900	Pf3D7_11_v3	1190123	+	4213	-0.555	-1.371	0.261	-0.11	-1.384	0.176	0.176	-4.847	conserved Plasmodium protein, unknown function	NA
4983	PF3D7_1406200	Pf3D7_14_v3	217845	+	8463	-0.233	-0.575	0.11	11.41	-1.383	0.176	0.176	-5.73	conserved Plasmodium protein, unknown function	NA
5063	PF3D7_1413800	Pf3D7_14_v3	547954	+	1464	-0.282	-0.696	0.133	5.898	-1.382	0.176	0.176	-5.344	diphthamide biosynthesis protein 1, putative	DPH1
2556	PF3D7_0924700	Pf3D7_09_v3	1006773	+	1770	-0.276	-0.682	0.13	7.08	-1.383	0.176	0.176	-5.459	splicing factor 3A subunit 3, putative	SF3A3
3049	PF3D7_1035000	Pf3D7_10_v3	1386649	-	2982	-0.326	-0.807	0.154	5.853	-1.383	0.176	0.176	-5.353	U2 snRNA/tRNA pseudouridine synthase, putative	NA
632	PF3D7_0318600	Pf3D7_03_v3	783112	-	3054	-0.221	-0.547	0.105	7.227	-1.38	0.177	0.177	-5.475	cleavage and polyadenylation specificity factor, putative	NA
3855	PF3D7_1222800	Pf3D7_12_v3	920790	-	1627	0.686	-0.324	1.696	-3.799	1.38	0.177	0.177	-4.685	conserved Plasmodium protein, unknown function	NA
1718	PF3D7_0708800	Pf3D7_07_v3	395711	+	2622	-0.198	-0.489	0.094	11.314	-1.38	0.177	0.177	-5.734	heat shock protein 110	HSP110c
1987	PF3D7_0802400	Pf3D7_08_v3	171865	+	2521	-0.176	-0.437	0.084	7.284	-1.376	0.178	0.178	-5.493	conserved Plasmodium protein, unknown function	NA
2571	PF3D7_0926200	Pf3D7_09_v3	1063053	+	156	0.472	-0.225	1.169	1.469	1.378	0.178	0.178	-4.933	conserved Plasmodium protein, unknown function	NA
5367	PF3D7_1443700	Pf3D7_14_v3	1791911	-	1094	-0.4	-0.991	0.191	0.265	-1.376	0.178	0.178	-4.857	dephospho-CoA kinase, putative	DPCK
4926	PF3D7_1400800	Pf3D7_14_v3	27321	-	1108	0.646	-0.309	1.602	-3.777	1.375	0.178	0.178	-4.688	rifin	RIF
141	PF3D7_0109800	Pf3D7_01_v3	380697	+	1728	-0.274	-0.68	0.132	6.717	-1.373	0.179	0.179	-5.443	phenylalanine--tRNA ligase alpha subunit	NA
346	PF3D7_0214100	Pf3D7_02_v3	568529	-	4787	-0.196	-0.486	0.095	10.009	-1.372	0.179	0.179	-5.674	protein transport protein SEC31	SEC31
5470	PF3D7_1454000	Pf3D7_14_v3	2219080	+	1536	-0.28	-0.694	0.135	6.271	-1.372	0.179	0.179	-5.396	RNA-binding protein, putative	NA
2323	PF3D7_0902100	Pf3D7_09_v3	93830	-	1784	0.721	-0.349	1.791	3.016	1.373	0.179	0.179	-5.062	serine/threonine protein kinase, FIKK family	FIKK9.2
1994	PF3D7_0803100	Pf3D7_08_v3	199181	-	3738	-0.238	-0.589	0.114	9.863	-1.373	0.179	0.179	-5.657	U3 small nucleolar RNA-associated protein 14, putative	UTP14
979	PF3D7_0502000	Pf3D7_05_v3	97657	+	4239	-0.254	-0.631	0.123	6.891	-1.372	0.179	0.179	-5.464	vacuolar protein sorting-associated protein 11, putative	VPS11
4084	PF3D7_1245600	Pf3D7_12_v3	1900249	-	4818	-0.49	-1.217	0.237	2.086	-1.371	0.18	0.18	-4.985	kinesin, putative	NA
79	PF3D7_0103700	Pf3D7_01_v3	166513	+	2175	0.487	-0.236	1.211	3.139	1.37	0.18	0.18	-5.098	L-seryl-tRNA(Sec) kinase, putative	PSTK
1189	PF3D7_0523000	Pf3D7_05_v3	957890	+	4260	-0.217	-0.538	0.105	10.499	-1.37	0.18	0.18	-5.703	multidrug resistance protein 1	MDR1
4004	PF3D7_1237600	Pf3D7_12_v3	1568605	+	1965	0.182	-0.089	0.454	7.589	1.368	0.18	0.18	-5.521	periodic tryptophan protein 1, putative	PWP1
962	PF3D7_0500400	Pf3D7_05_v3	33056	-	1323	-0.906	-2.252	0.44	-0.034	-1.371	0.18	0.18	-4.85	rifin	RIF
1064	PF3D7_0510600	Pf3D7_05_v3	451355	+	80	-0.817	-2.029	0.396	-3.762	-1.37	0.18	0.18	-4.697	tRNA Leucine	NA
34	malmito_rna_RNA14	Pf_M76611	5508	-	39	-0.528	-1.313	0.257	-4.655	-1.368	0.18	0.18	-4.678	unspecified product	RNA14
5262	PF3D7_1433300	Pf3D7_14_v3	1310041	+	1794	-0.505	-1.258	0.247	2.702	-1.366	0.181	0.181	-5.079	chromatin assembly factor 1 P55 subunit, putative	NA
2078	PF3D7_0811400	Pf3D7_08_v3	575986	+	2385	-0.258	-0.641	0.126	8.674	-1.367	0.181	0.181	-5.613	conserved protein, unknown function	NA
4293	PF3D7_1310900	Pf3D7_13_v3	476223	+	912	0.276	-0.135	0.687	4.466	1.366	0.181	0.181	-5.217	mitochondrial ribosomal protein S15 precursor, putative	NA
5231	PF3D7_1430200	Pf3D7_14_v3	1188349	+	3118	0.418	-0.205	1.042	3.478	1.365	0.181	0.181	-5.111	plasmepsin IX	NA
4014	PF3D7_1238600	Pf3D7_12_v3	1601515	-	1182	0.598	-0.292	1.488	-1.739	1.366	0.181	0.181	-4.766	sphingomyelin phosphodiesterase	NSM
4142	PF3D7_1251300	Pf3D7_12_v3	2095062	-	1447	0.451	-0.22	1.122	0.401	1.366	0.181	0.181	-4.86	thymidylate kinase	TMK
1137	PF3D7_0517800	Pf3D7_05_v3	745798	-	837	-0.413	-1.029	0.203	3.42	-1.364	0.182	0.182	-5.127	apicortin, putative	NA
2789	PF3D7_1009800	Pf3D7_10_v3	393765	-	4229	-0.217	-0.541	0.107	6.685	-1.364	0.182	0.182	-5.448	conserved Plasmodium membrane protein, unknown function	NA
1036	PF3D7_0507800	Pf3D7_05_v3	322239	+	4584	-0.332	-0.829	0.164	10.228	-1.364	0.182	0.182	-5.697	conserved Plasmodium protein, unknown function	NA
4806	PF3D7_1361800	Pf3D7_13_v3	2473530	+	8097	0.634	-0.312	1.581	0.46	1.363	0.182	0.182	-4.887	conserved Plasmodium protein, unknown function	NA
5028	PF3D7_1410600	Pf3D7_14_v3	427191	+	1398	-0.206	-0.514	0.101	10.709	-1.364	0.182	0.182	-5.72	eukaryotic translation initiation factor 2 subunit gamma, putative	eIF2gamma
5260	PF3D7_1433100	Pf3D7_14_v3	1299894	+	3833	-0.364	-0.907	0.179	3.236	-1.362	0.182	0.182	-5.105	HID1 domain-containing protein, putative	NA
1825	PF3D7_0719500	Pf3D7_07_v3	854652	-	2003	-0.385	-0.96	0.189	2.82	-1.364	0.182	0.182	-5.07	LEM3/CDC50 family protein, putative	NA
4728	PF3D7_1353900	Pf3D7_13_v3	2154162	+	1056	0.241	-0.119	0.6	6.955	1.362	0.182	0.182	-5.487	proteasome subunit alpha type-7, putative	NA
1969	PF3D7_0800700	Pf3D7_08_v3	65716	-	6070	-0.6	-1.496	0.295	3.646	-1.365	0.182	0.182	-5.178	surface-associated interspersed protein 8.3 (SURFIN 8.3)	SURF8.3
3025	PF3D7_1032600	Pf3D7_10_v3	1308873	+	1053	0.427	-0.211	1.064	1.047	1.36	0.183	0.183	-4.933	conserved protein, unknown function	NA
42	malmito_SSUB	Pf_M76611	390	-	116	-0.658	-1.64	0.325	-3.226	-1.361	0.183	0.183	-4.714	unspecified product	SSUB
2171	PF3D7_0820700	Pf3D7_08_v3	932321	+	3306	0.378	-0.189	0.944	2.992	1.356	0.184	0.184	-5.104	2-oxoglutarate dehydrogenase E1 component	KDH
3391	PF3D7_1127800	Pf3D7_11_v3	1077288	-	4263	-0.248	-0.62	0.124	7.31	-1.357	0.184	0.184	-5.514	conserved Plasmodium protein, unknown function	NA
5046	PF3D7_1412200	Pf3D7_14_v3	487776	-	2605	0.342	-0.17	0.853	5.46	1.357	0.184	0.184	-5.317	conserved Plasmodium protein, unknown function	NA
1662	PF3D7_0703300	Pf3D7_07_v3	128540	+	441	0.485	-0.241	1.212	2.801	1.358	0.184	0.184	-5.1	conserved Plasmodium protein, unknown function	NA
1372	PF3D7_0607900	Pf3D7_06_v3	332343	+	2592	0.542	-0.27	1.355	0.728	1.357	0.184	0.184	-4.914	conserved Plasmodium protein, unknown function	NA
2667	PF3D7_0935600	Pf3D7_09_v3	1405192	+	1831	0.317	-0.158	0.793	11.019	1.359	0.184	0.184	-5.728	gametocytogenesis-implicated protein	GIG
3133	PF3D7_1102400	Pf3D7_11_v3	114591	-	1983	-0.298	-0.744	0.149	5.037	-1.356	0.184	0.184	-5.309	phosphopantothenate--cysteine ligase, putative	NA
2806	PF3D7_1011400	Pf3D7_10_v3	441140	-	816	-0.337	-0.843	0.168	4.349	-1.357	0.184	0.184	-5.227	proteasome subunit beta type-5	NA
3640	PF3D7_1201500	Pf3D7_12_v3	98978	+	1494	-0.196	-0.489	0.098	8.142	-1.355	0.184	0.184	-5.574	XPA binding protein 1, putative	NA
832	PF3D7_0413600	Pf3D7_04_v3	616914	-	1437	-0.225	-0.563	0.113	7.281	-1.354	0.185	0.185	-5.526	26S protease regulatory subunit 6B, putative	RPT3
4907	PF3D7_1372400	Pf3D7_13_v3	2850891	+	2592	-0.462	-1.156	0.232	1.639	-1.354	0.185	0.185	-4.968	acyl-CoA synthetase	ACS4
4439	PF3D7_1325300	Pf3D7_13_v3	1050915	+	405	-0.632	-1.582	0.318	-0.957	-1.352	0.185	0.185	-4.816	conserved Plasmodium protein, unknown function	NA
4545	PF3D7_1335700	Pf3D7_13_v3	1456110	-	5217	0.381	-0.192	0.955	2.986	1.352	0.185	0.185	-5.113	conserved Plasmodium protein, unknown function	NA
5088	PF3D7_1416300	Pf3D7_14_v3	659539	+	1365	0.592	-0.299	1.483	3.223	1.352	0.185	0.185	-5.109	conserved protein, unknown function	NA
1604	PF3D7_0630300	Pf3D7_06_v3	1260398	-	9199	-0.761	-1.905	0.382	-0.643	-1.354	0.185	0.185	-4.84	DNA polymerase epsilon catalytic subunit A, putative	NA
1121	PF3D7_0516200	Pf3D7_05_v3	675809	-	806	-0.22	-0.552	0.111	9.292	-1.351	0.186	0.186	-5.661	40S ribosomal protein S11	RPS11
2462	PF3D7_0915500	Pf3D7_09_v3	657418	+	1995	-0.511	-1.28	0.259	1.587	-1.35	0.186	0.186	-4.977	conserved Plasmodium protein, unknown function	NA
3781	PF3D7_1215400	Pf3D7_12_v3	631161	-	1851	0.544	-0.275	1.363	-1.724	1.351	0.186	0.186	-4.786	conserved Plasmodium protein, unknown function	NA
1695	PF3D7_0706600	Pf3D7_07_v3	320248	+	2034	0.57	-0.289	1.429	0.652	1.349	0.186	0.186	-4.897	conserved Plasmodium protein, unknown function	NA
5511	PF3D7_1458000	Pf3D7_14_v3	2387786	+	1710	-0.218	-0.546	0.11	7.97	-1.351	0.186	0.186	-5.569	cysteine proteinase falcipain 1	FP1
3806	PF3D7_1217800	Pf3D7_12_v3	698771	-	243	-0.292	-0.731	0.147	3.553	-1.351	0.186	0.186	-5.133	diphthamide biosynthesis protein 3, putative	DPH3
5519	PF3D7_1458800	Pf3D7_14_v3	2414870	-	2598	-0.253	-0.634	0.128	5.444	-1.349	0.186	0.186	-5.348	DNA-directed RNA polymerase III subunit RPC5, putative	NA
2679	PF3D7_0936800	Pf3D7_09_v3	1458392	+	1471	-0.493	-1.237	0.251	10.477	-1.355	0.186	0.186	-5.741	Plasmodium exported protein (PHISTc), unknown function	NA
4981	PF3D7_1406000	Pf3D7_14_v3	210300	+	661	0.272	-0.138	0.682	4.611	1.35	0.186	0.186	-5.27	RNA-binding protein 8A, putative	RBM8A
33	malmito_rna_RNA12	Pf_M76611	4887	+	59	-0.49	-1.227	0.248	-4.655	-1.35	0.186	0.186	-4.697	unspecified product	RNA12
3530	PF3D7_1141000	Pf3D7_11_v3	1644911	+	2472	-0.773	-1.942	0.395	-1.661	-1.346	0.187	0.187	-4.793	conserved Plasmodium protein, unknown function	NA
4637	PF3D7_1344900	Pf3D7_13_v3	1801271	+	4467	-0.234	-0.586	0.119	8.207	-1.349	0.187	0.187	-5.598	conserved Plasmodium protein, unknown function	NA
5723	PF3D7_1479200	Pf3D7_14_v3	3260745	+	983	2.024	-1.043	5.091	-0.358	1.354	0.187	0.187	-4.83	Plasmodium exported protein (PHISTa), unknown function	NA
4673	PF3D7_1348500	Pf3D7_13_v3	1950400	+	1448	0.7	-0.357	1.757	0.749	1.346	0.187	0.187	-4.931	TBC domain protein, putative	NA
2772	PF3D7_1008100	Pf3D7_10_v3	331246	+	11562	-0.262	-0.657	0.133	8.501	-1.347	0.187	0.187	-5.621	zinc finger protein, putative	NA
3338	PF3D7_1122500	Pf3D7_11_v3	853355	+	5871	0.438	-0.225	1.102	0.155	1.343	0.188	0.188	-4.876	conserved Plasmodium protein, unknown function	NA
5557	PF3D7_1462500	Pf3D7_14_v3	2544824	-	4962	0.47	-0.241	1.181	0.568	1.345	0.188	0.188	-4.899	conserved Plasmodium protein, unknown function	NA
1787	PF3D7_0715600	Pf3D7_07_v3	691068	+	2265	0.66	-0.338	1.659	-2.867	1.344	0.188	0.188	-4.755	GTP-binding translation elongation factor tu family protein, putative	NA
4216	PF3D7_1303400	Pf3D7_13_v3	165013	-	3069	-0.176	-0.442	0.09	9.55	-1.345	0.188	0.188	-5.675	LisH domain-containing protein, putative	LisH
2573	PF3D7_0926400	Pf3D7_09_v3	1070965	-	1991	-0.253	-0.634	0.129	4.798	-1.345	0.188	0.188	-5.28	monocarboxylate transporter, putative	NA
4421	PF3D7_1323500	Pf3D7_13_v3	975403	+	1773	-0.347	-0.872	0.178	5.943	-1.344	0.188	0.188	-5.428	plasmepsin V	PMV
448	PF3D7_0300600	Pf3D7_03_v3	58307	-	213	-0.584	-1.466	0.299	-3.275	-1.345	0.188	0.188	-4.734	Plasmodium exported protein, unknown function, fragment	NA
5394	PF3D7_1446400	Pf3D7_14_v3	1902916	-	1248	-0.527	-1.325	0.271	3.869	-1.344	0.188	0.188	-5.192	pyruvate dehydrogenase E1 component subunit beta	pdhB
1631	PF3D7_0700200	Pf3D7_07_v3	30097	+	1173	0.841	-0.432	2.114	-0.704	1.344	0.188	0.188	-4.821	rifin	RIF
1309	PF3D7_0601600	Pf3D7_06_v3	68833	-	861	-0.437	-1.097	0.224	4.087	-1.344	0.188	0.188	-5.202	tetratricopeptide repeat protein, putative	NA
4389	PF3D7_1320400	Pf3D7_13_v3	841671	-	1080	-0.405	-1.019	0.208	1.52	-1.343	0.188	0.188	-5.032	type I signal peptidase	SPB
4347	PF3D7_1316200	Pf3D7_13_v3	680039	+	817	0.315	-0.163	0.794	2.22	1.34	0.189	0.189	-5.039	ADP-ribosylation factor, putative	NA
4694	PF3D7_1350600	Pf3D7_13_v3	2021350	+	958	-0.459	-1.156	0.238	2.646	-1.34	0.189	0.189	-5.069	conserved Plasmodium protein, unknown function	NA
5472	PF3D7_1454200	Pf3D7_14_v3	2222490	-	4215	-0.325	-0.817	0.168	5.333	-1.341	0.189	0.189	-5.334	conserved Plasmodium protein, unknown function	NA
5469	PF3D7_1453900	Pf3D7_14_v3	2214910	+	2886	-0.307	-0.771	0.158	8.388	-1.341	0.189	0.189	-5.612	conserved Plasmodium protein, unknown function	NA
587	PF3D7_0314200	Pf3D7_03_v3	572666	-	4158	0.496	-0.256	1.247	1.196	1.341	0.189	0.189	-4.977	conserved Plasmodium protein, unknown function	NA
1265	PF3D7_0530400	Pf3D7_05_v3	1238633	-	5355	0.561	-0.289	1.412	-0.623	1.341	0.189	0.189	-4.842	conserved Plasmodium protein, unknown function	NA
1757	PF3D7_0712600	Pf3D7_07_v3	566726	-	7583	-0.588	-1.481	0.305	4.051	-1.341	0.189	0.189	-5.216	erythrocyte membrane protein 1, PfEMP1	VAR
686	PF3D7_0324000	Pf3D7_03_v3	1005952	+	849	-0.541	-1.363	0.28	-0.788	-1.34	0.189	0.189	-4.841	exported protein family 1	EPF1
3259	PF3D7_1114800	Pf3D7_11_v3	558924	-	2109	0.344	-0.177	0.865	1.68	1.342	0.189	0.189	-4.975	glycerol-3-phosphate dehydrogenase, putative	G3PDH
5347	PF3D7_1441700	Pf3D7_14_v3	1700674	+	1377	0.496	-0.255	1.247	-0.628	1.342	0.189	0.189	-4.831	mitochondrial inner membrane protease ATP23, putative	ATP23
2036	PF3D7_0807300	Pf3D7_08_v3	381564	+	1284	-0.326	-0.82	0.169	6.346	-1.34	0.189	0.189	-5.449	ras-related protein Rab-18	RAB18
3682	PF3D7_1205700	Pf3D7_12_v3	253155	+	969	0.558	-0.289	1.406	2.073	1.34	0.189	0.189	-5.032	targeted glyoxalase II	tGloII
1936	PF3D7_0730600	Pf3D7_07_v3	1318059	+	73	-0.51	-1.285	0.264	-1.252	-1.341	0.189	0.189	-4.796	tRNA Valine	NA
114	PF3D7_0107100	Pf3D7_01_v3	295300	-	1632	0.529	-0.276	1.335	-1.139	1.336	0.19	0.19	-4.825	conserved Plasmodium protein, unknown function	NA
1216	PF3D7_0525700	Pf3D7_05_v3	1068516	+	770	0.729	-0.379	1.837	-3.221	1.337	0.19	0.19	-4.744	conserved Plasmodium protein, unknown function	NA
4821	PF3D7_1363300	Pf3D7_13_v3	2542284	+	867	0.319	-0.168	0.806	2.599	1.333	0.191	0.191	-5.097	50S ribosomal protein L9, mitochondrial, putative	NA
455	PF3D7_0301300	Pf3D7_03_v3	82011	-	1505	0.273	-0.143	0.69	6.804	1.335	0.191	0.191	-5.507	alpha/beta hydrolase, putative	NA
1782	PF3D7_0715100	Pf3D7_07_v3	674610	-	521	-0.619	-1.561	0.323	-1.982	-1.336	0.191	0.191	-4.779	C-Myc-binding protein, putative	MYCBP
4937	PF3D7_1401800	Pf3D7_14_v3	71368	+	1323	0.374	-0.196	0.943	3.278	1.334	0.191	0.191	-5.206	choline kinase	CK
1037	PF3D7_0507900	Pf3D7_05_v3	327656	+	661	-0.243	-0.614	0.128	5.067	-1.334	0.191	0.191	-5.312	conserved Plasmodium protein, unknown function	NA
635	PF3D7_0318900	Pf3D7_03_v3	791840	-	1642	-0.184	-0.464	0.096	6.962	-1.334	0.191	0.191	-5.532	conserved protein, unknown function	NA
1247	PF3D7_0528700	Pf3D7_05_v3	1178276	-	615	-0.274	-0.693	0.144	6.56	-1.334	0.191	0.191	-5.467	peptidyl-prolyl cis-trans isomerase	CYP23
2218	PF3D7_0825400	Pf3D7_08_v3	1096423	+	941	0.369	-0.194	0.933	2.415	1.332	0.192	0.192	-5.059	conserved Apicomplexan protein, unknown function	NA
2632	PF3D7_0932100	Pf3D7_09_v3	1279219	-	4661	0.617	-0.326	1.559	3.088	1.331	0.192	0.192	-5.092	protein MAM3, putative	NA
2516	PF3D7_0920900	Pf3D7_09_v3	855516	+	1771	-0.237	-0.6	0.125	6.52	-1.331	0.192	0.192	-5.486	U4/U6 snRNA-associated-splicing factor, putative	PRP24
5315	PF3D7_1438500	Pf3D7_14_v3	1557527	-	2631	-0.268	-0.678	0.142	6.341	-1.329	0.193	0.193	-5.46	cleavage and polyadenylation specificity factor subunit 3, putative	CPSF3
108	PF3D7_0106500	Pf3D7_01_v3	274315	+	4236	-0.48	-1.215	0.255	3.153	-1.328	0.193	0.193	-5.157	conserved Plasmodium protein, unknown function	NA
517	PF3D7_0307500	Pf3D7_03_v3	322933	-	1904	0.643	-0.34	1.626	-2.064	1.33	0.193	0.193	-4.79	conserved protein, unknown function	NA
1892	PF3D7_0726300	Pf3D7_07_v3	1104156	+	4209	0.322	-0.171	0.815	4.124	1.33	0.193	0.193	-5.206	DNA mismatch repair protein PMS1, putative	PMS1
3114	PF3D7_1100400	Pf3D7_11_v3	48112	+	1196	0.849	-0.45	2.148	-2.556	1.329	0.193	0.193	-4.767	rifin	RIF
4978	PF3D7_1405700	Pf3D7_14_v3	196327	-	2160	-0.317	-0.803	0.169	3.757	-1.328	0.193	0.193	-5.2	RING zinc finger protein, putative	NA
276	PF3D7_0207300	Pf3D7_02_v3	290168	-	2536	-0.651	-1.648	0.346	-4.099	-1.328	0.193	0.193	-4.735	serine repeat antigen 8	SERA8
3976	PF3D7_1234800	Pf3D7_12_v3	1452606	+	4622	-0.148	-0.374	0.078	8.738	-1.329	0.193	0.193	-5.654	splicing factor 3B subunit 3, putative	SF3B3
1274	PF3D7_0531200	Pf3D7_05_v3	1279958	-	642	0.711	-0.38	1.803	-3.241	1.325	0.194	0.194	-4.76	mitochondrial ribosomal protein S16 precursor, putative	NA
5383	PF3D7_1445300	Pf3D7_14_v3	1860148	+	1948	0.35	-0.187	0.886	4.214	1.325	0.194	0.194	-5.233	mitochondrial ribosomal protein S29 precursor, putative	NA
1112	PF3D7_0515300	Pf3D7_05_v3	628981	+	6402	-0.308	-0.78	0.165	6.447	-1.324	0.194	0.194	-5.5	phosphatidylinositol 3-kinase	PI3K
5703	PF3D7_1477200	Pf3D7_14_v3	3175541	+	918	-0.647	-1.64	0.346	-2.107	-1.325	0.194	0.194	-4.801	Plasmodium exported protein (hyp15), unknown function	NA
2383	PF3D7_0907700	Pf3D7_09_v3	364069	-	840	-0.273	-0.691	0.145	8.269	-1.326	0.194	0.194	-5.629	subunit of proteaseome activator complex, putative	PA28
1507	PF3D7_0620900	Pf3D7_06_v3	861685	-	81	-0.793	-2.009	0.423	-3.597	-1.326	0.194	0.194	-4.75	tRNA Leucine	NA
5016	PF3D7_1409400	Pf3D7_14_v3	365509	-	1519	0.532	-0.285	1.349	-0.968	1.323	0.195	0.195	-4.851	conserved Plasmodium membrane protein, unknown function	NA
558	PF3D7_0311500	Pf3D7_03_v3	497118	-	246	-0.279	-0.709	0.15	6.029	-1.322	0.195	0.195	-5.428	conserved Plasmodium protein, unknown function	NA
2494	PF3D7_0918700	Pf3D7_09_v3	769452	+	2654	0.279	-0.15	0.708	7.345	1.324	0.195	0.195	-5.53	conserved Plasmodium protein, unknown function	NA
1053	PF3D7_0509500	Pf3D7_05_v3	401437	+	1335	-0.526	-1.336	0.283	2.812	-1.322	0.195	0.195	-5.095	ERCC4 domain-containing protein, putative	NA
3818	PF3D7_1219000	Pf3D7_12_v3	746002	+	8925	-0.571	-1.451	0.309	5.499	-1.324	0.195	0.195	-5.438	formin 2	NA
1076	PF3D7_0511800	Pf3D7_05_v3	520720	-	1974	0.292	-0.156	0.74	8.629	1.324	0.195	0.195	-5.664	inositol-3-phosphate synthase	INO1
3957	PF3D7_1232900	Pf3D7_12_v3	1351482	-	2623	0.389	-0.209	0.986	3.59	1.323	0.195	0.195	-5.251	nucleotidyltransferase, putative	NA
1122	PF3D7_0516300	Pf3D7_05_v3	678910	+	2046	-0.326	-0.828	0.176	6.193	-1.322	0.195	0.195	-5.479	tRNA pseudouridine synthase, putative	NA
1899	PF3D7_0727000	Pf3D7_07_v3	1147570	-	3489	0.435	-0.234	1.104	3.991	1.322	0.195	0.195	-5.226	vacuolar protein sorting-associated protein 53, putative	VPS53
1688	PF3D7_0705900	Pf3D7_07_v3	290100	-	1121	0.331	-0.179	0.84	3.6	1.32	0.196	0.196	-5.194	ATP synthase subunit C, putative	NA
4811	PF3D7_1362300	Pf3D7_13_v3	2493143	+	570	-0.26	-0.661	0.141	4.765	-1.319	0.196	0.196	-5.321	conserved protein, unknown function	NA
1644	PF3D7_0701500	Pf3D7_07_v3	68066	+	775	-0.444	-1.127	0.24	2.507	-1.32	0.196	0.196	-5.07	exported protein family 3	EPF3
4512	PF3D7_1332400	Pf3D7_13_v3	1337117	-	2577	-0.241	-0.613	0.13	6.777	-1.32	0.196	0.196	-5.534	nucleotidyltransferase, putative	NA
3551	PF3D7_1143100	Pf3D7_11_v3	1720047	-	4815	0.507	-0.274	1.289	-0.112	1.32	0.196	0.196	-4.909	transcription factor with AP2 domain(s)	AP2-O
4417	PF3D7_1323100	Pf3D7_13_v3	965486	-	795	-0.204	-0.519	0.111	8.777	-1.316	0.197	0.197	-5.677	60S ribosomal protein L6, putative	NA
849	PF3D7_0415200	Pf3D7_04_v3	672500	-	6639	-0.269	-0.685	0.146	3.682	-1.318	0.197	0.197	-5.196	conserved Plasmodium protein, unknown function	NA
579	PF3D7_0313600	Pf3D7_03_v3	552001	-	2621	0.577	-0.314	1.468	-1.172	1.317	0.197	0.197	-4.852	conserved Plasmodium protein, unknown function	NA
3857	PF3D7_1223000	Pf3D7_12_v3	925375	-	875	0.615	-0.334	1.565	-2.471	1.317	0.197	0.197	-4.788	conserved Plasmodium protein, unknown function	NA
1447	PF3D7_0615100	Pf3D7_06_v3	623023	-	1299	0.377	-0.205	0.96	2.323	1.317	0.197	0.197	-5.062	enoyl-acyl carrier reductase	ENR
5123	PF3D7_1419800	Pf3D7_14_v3	822423	-	1918	0.419	-0.228	1.065	3.878	1.316	0.197	0.197	-5.222	glutathione reductase	GR
5124	PF3D7_1419800	Pf3D7_14_v3	822423	-	1918	0.419	-0.228	1.065	3.878	1.316	0.197	0.197	-5.222	glutathione reductase	GR
955	PF3D7_0425700	Pf3D7_04_v3	1152504	-	1130	0.808	-0.439	2.055	-0.749	1.318	0.197	0.197	-4.85	rifin	RIF
169	PF3D7_0112600	Pf3D7_01_v3	476429	+	850	0.675	-0.368	1.719	-0.532	1.317	0.197	0.197	-4.86	unspecified product	NA
3743	PF3D7_1211700	Pf3D7_12_v3	521687	+	2784	0.359	-0.197	0.915	3.842	1.314	0.198	0.198	-5.224	DNA replication licensing factor MCM5, putative	MCM5
4972	PF3D7_1405100	Pf3D7_14_v3	175503	-	4203	0.301	-0.165	0.767	5.31	1.314	0.198	0.198	-5.401	GTPase-activating protein, putative	NA
5243	PF3D7_1431400	Pf3D7_14_v3	1233977	-	3149	-0.211	-0.539	0.117	6.003	-1.31	0.199	0.199	-5.447	conserved Plasmodium protein, unknown function	NA
4196	PF3D7_1301500	Pf3D7_13_v3	85563	-	1062	0.856	-0.473	2.185	0.385	1.313	0.199	0.199	-4.997	Plasmodium exported protein (PHISTa), unknown function	NA
4105	PF3D7_1247600	Pf3D7_12_v3	1962774	-	1485	0.797	-0.444	2.038	-2.371	1.307	0.2	0.2	-4.803	conserved Plasmodium protein, unknown function	NA
1370	PF3D7_0607700	Pf3D7_06_v3	320740	+	8259	0.898	-0.497	2.293	-2.892	1.309	0.2	0.2	-4.784	conserved Plasmodium protein, unknown function	NA
3625	PF3D7_1150400	Pf3D7_11_v3	2025817	+	10070	0.969	-0.541	2.478	3.734	1.313	0.2	0.2	-5.211	erythrocyte membrane protein 1, PfEMP1	VAR
3360	PF3D7_1124700	Pf3D7_11_v3	974493	-	1046	0.276	-0.153	0.704	6.245	1.307	0.2	0.2	-5.508	GrpE protein homolog, mitochondrial, putative	MGE1
4903	PF3D7_1372000	Pf3D7_13_v3	2832952	+	1371	-1.093	-2.798	0.612	2.816	-1.313	0.2	0.2	-5.163	Plasmodium exported protein (PHISTa), unknown function	NA
1332	PF3D7_0603900	Pf3D7_06_v3	161254	-	1128	-0.628	-1.608	0.352	-3.131	-1.304	0.201	0.201	-4.785	conserved Plasmodium protein, unknown function	NA
2018	PF3D7_0805500	Pf3D7_08_v3	305295	-	3255	-0.327	-0.838	0.183	6.507	-1.304	0.201	0.201	-5.512	conserved Plasmodium protein, unknown function	NA
3599	PF3D7_1147900	Pf3D7_11_v3	1907055	-	654	-0.199	-0.51	0.111	5.926	-1.305	0.201	0.201	-5.464	conserved Plasmodium protein, unknown function	NA
732	PF3D7_0403600	Pf3D7_04_v3	197846	-	3363	0.801	-0.448	2.051	1.074	1.307	0.201	0.201	-5.027	conserved Plasmodium protein, unknown function	NA
4289	PF3D7_1310500	Pf3D7_13_v3	463385	-	618	-0.286	-0.733	0.16	4.872	-1.304	0.201	0.201	-5.341	conserved protein, unknown function	NA
660	PF3D7_0321400	Pf3D7_03_v3	894761	+	1352	0.617	-0.345	1.58	-2.353	1.304	0.201	0.201	-4.811	protein kinase, putative	NA
1611	PF3D7_0631000	Pf3D7_06_v3	1295474	+	858	-0.565	-1.444	0.315	2.063	-1.305	0.201	0.201	-5.055	tetratricopeptide repeat protein, putative	NA
5573	PF3D7_1464100	Pf3D7_14_v3	2595869	+	2703	0.41	-0.231	1.05	1.328	1.3	0.202	0.202	-5.023	conserved Plasmodium protein, unknown function	NA
4155	PF3D7_1252600	Pf3D7_12_v3	2150554	+	1362	-0.365	-0.936	0.205	7.374	-1.303	0.202	0.202	-5.564	lysophospholipase, putative	NA
3361	PF3D7_1124800	Pf3D7_11_v3	976880	-	1057	0.166	-0.093	0.424	8.634	1.302	0.202	0.202	-5.678	nuclear preribosomal assembly protein, putative	NA
2723	PF3D7_1003200	Pf3D7_10_v3	149342	+	697	0.529	-0.298	1.356	-0.031	1.301	0.202	0.202	-4.944	ribosome-binding factor A, putative	NA
4042	PF3D7_1241400	Pf3D7_12_v3	1760416	-	5976	0.808	-0.454	2.069	-0.09	1.304	0.202	0.202	-4.954	RNA-binding protein, putative	NA
4773	PF3D7_1358500	Pf3D7_13_v3	2318686	+	1842	-0.215	-0.551	0.121	6.558	-1.302	0.202	0.202	-5.535	zinc finger protein, putative	NA
254	PF3D7_0205200	Pf3D7_02_v3	217882	-	1026	-0.662	-1.697	0.374	-1.918	-1.3	0.203	0.203	-4.834	conserved Plasmodium protein, unknown function	NA
779	PF3D7_0408400	Pf3D7_04_v3	406233	-	1677	0.539	-0.305	1.383	-2.379	1.299	0.203	0.203	-4.814	conserved Plasmodium protein, unknown function	NA
2223	PF3D7_0825900	Pf3D7_08_v3	1106048	+	1914	0.55	-0.312	1.413	-0.285	1.298	0.203	0.203	-4.913	conserved Plasmodium protein, unknown function	NA
1373	PF3D7_0608000	Pf3D7_06_v3	335107	-	2262	0.347	-0.196	0.891	4.87	1.299	0.203	0.203	-5.362	diphthine methyltransferase, putative	DPH7
1845	PF3D7_0721500	Pf3D7_07_v3	928514	+	2340	0.52	-0.297	1.338	2.588	1.295	0.204	0.204	-5.119	conserved Plasmodium membrane protein, unknown function	NA
2210	PF3D7_0824600	Pf3D7_08_v3	1068563	+	1340	-0.182	-0.469	0.104	6.902	-1.297	0.204	0.204	-5.556	Fe-S cluster assembly protein DRE2, putative	DRE2
334	PF3D7_0212900	Pf3D7_02_v3	533253	+	1098	0.646	-0.367	1.659	-1.912	1.296	0.204	0.204	-4.838	leucyl/phenylalanyl-tRNA--protein transferase, putative	NA
181	PF3D7_0113900	Pf3D7_01_v3	537109	-	917	-0.312	-0.802	0.178	5.574	-1.296	0.204	0.204	-5.41	Plasmodium exported protein (hyp8), unknown function	GEXP10
4865	PF3D7_1367700	Pf3D7_13_v3	2695655	+	4227	-0.21	-0.54	0.12	9.962	-1.294	0.205	0.205	-5.77	alanine--tRNA ligase	AlaRS
100	PF3D7_0105700	Pf3D7_01_v3	238666	+	9192	0.514	-0.294	1.322	2.629	1.293	0.205	0.205	-5.123	asparagine-rich antigen Pfa35-2	NA
982	PF3D7_0502300	Pf3D7_05_v3	107075	-	864	-0.68	-1.748	0.389	-1.826	-1.293	0.205	0.205	-4.837	conserved Plasmodium protein, unknown function	NA
1499	PF3D7_0620100	Pf3D7_06_v3	845660	+	498	0.654	-0.375	1.683	-3.347	1.293	0.205	0.205	-4.786	conserved Plasmodium protein, unknown function	NA
3117	PF3D7_1100700	Pf3D7_11_v3	56792	+	1049	-0.481	-1.239	0.277	-4.705	-1.291	0.205	0.205	-4.757	stevor, pseudogene	NA
2458	PF3D7_0915100	Pf3D7_09_v3	643232	-	812	-0.188	-0.483	0.108	6.356	-1.293	0.205	0.205	-5.503	SUMO-conjugating enzyme UBC9	UBC9
2041	PF3D7_0807800	Pf3D7_08_v3	399591	-	1770	-0.162	-0.418	0.094	7.891	-1.289	0.206	0.206	-5.649	26S proteasome regulatory subunit RPN10, putative	RPN10
1437	PF3D7_0614100	Pf3D7_06_v3	589457	-	2808	-0.419	-1.081	0.242	1.419	-1.29	0.206	0.206	-5.034	conserved Plasmodium protein, unknown function	NA
2206	PF3D7_0824200	Pf3D7_08_v3	1055135	+	3869	0.505	-0.291	1.3	0.211	1.29	0.206	0.206	-4.947	conserved Plasmodium protein, unknown function	NA
668	PF3D7_0322200	Pf3D7_03_v3	933188	-	3819	0.559	-0.323	1.44	-0.561	1.289	0.206	0.206	-4.897	conserved Plasmodium protein, unknown function	NA
3161	PF3D7_1105100	Pf3D7_11_v3	226065	+	354	0.43	-0.249	1.11	9.419	1.292	0.206	0.206	-5.753	histone H2B	H2B
1045	PF3D7_0508700	Pf3D7_05_v3	358261	+	4473	-0.217	-0.559	0.125	8.828	-1.289	0.206	0.206	-5.704	pre-mRNA-processing ATP-dependent RNA helicase PRP5, putative	PRP5
703	PF3D7_0400800	Pf3D7_04_v3	66601	-	973	-0.932	-2.401	0.537	-2.798	-1.29	0.206	0.206	-4.804	stevor	NA
2016	PF3D7_0805300	Pf3D7_08_v3	293113	-	3759	-0.508	-1.313	0.297	-1.232	-1.283	0.208	0.208	-4.883	conserved Plasmodium protein, unknown function	NA
2713	PF3D7_1002300	Pf3D7_10_v3	117242	+	1293	0.35	-0.205	0.905	2.603	1.283	0.208	0.208	-5.137	conserved Plasmodium protein, unknown function	NA
5645	PF3D7_1471300	Pf3D7_14_v3	2915747	-	2260	0.573	-0.334	1.481	1.221	1.285	0.208	0.208	-5.044	conserved Plasmodium protein, unknown function	NA
848	PF3D7_0415100	Pf3D7_04_v3	670883	+	1242	-0.271	-0.7	0.159	4.155	-1.283	0.208	0.208	-5.308	conserved protein, unknown function	NA
3850	PF3D7_1222300	Pf3D7_12_v3	883567	-	2466	0.229	-0.134	0.592	7.688	1.284	0.208	0.208	-5.671	endoplasmin, putative	GRP94
150	PF3D7_0110600	Pf3D7_01_v3	405739	+	6431	-0.218	-0.564	0.128	9.381	-1.283	0.208	0.208	-5.744	phosphatidylinositol-4-phosphate 5-kinase	PIP5K
727	PF3D7_0403100	Pf3D7_04_v3	175372	-	1881	0.41	-0.24	1.059	3.143	1.283	0.208	0.208	-5.173	regulator of chromosome condensation, putative	NA
386	PF3D7_0218000	Pf3D7_02_v3	738860	+	993	0.454	-0.266	1.175	0.217	1.283	0.208	0.208	-4.974	replication factor C subunit 2, putative	RFC2
4920	PF3D7_1400200	Pf3D7_14_v3	7208	-	1331	-0.642	-1.658	0.375	1.338	-1.284	0.208	0.208	-5.022	rifin	RIF
4047	PF3D7_1241900	Pf3D7_12_v3	1784380	+	2031	-0.219	-0.565	0.128	8.502	-1.284	0.208	0.208	-5.687	tetratricopeptide repeat protein, putative	NA
583	PF3D7_0313900	Pf3D7_03_v3	562366	-	3291	0.555	-0.327	1.437	-1.729	1.28	0.209	0.209	-4.86	conserved Plasmodium protein, unknown function	NA
3404	PF3D7_1129100	Pf3D7_11_v3	1125952	+	1359	-0.194	-0.503	0.114	9.846	-1.28	0.209	0.209	-5.782	parasitophorous vacuolar protein 1	PV1
5049	PF3D7_1412500	Pf3D7_14_v3	507360	+	1509	-0.24	-0.622	0.142	7.592	-1.278	0.21	0.21	-5.655	actin II	ACT2
1665	PF3D7_0703600	Pf3D7_07_v3	144019	+	1935	0.347	-0.205	0.898	3.255	1.278	0.21	0.21	-5.206	conserved Plasmodium protein, unknown function	NA
1834	PF3D7_0720400	Pf3D7_07_v3	882936	+	2053	0.267	-0.158	0.692	5.928	1.279	0.21	0.21	-5.503	ferrodoxin reductase-like protein	NA
3298	PF3D7_1118500	Pf3D7_11_v3	703175	+	1785	-0.207	-0.535	0.122	10.065	-1.278	0.21	0.21	-5.791	nucleolar protein 56, putative	NOP56
5416	PF3D7_1448600	Pf3D7_14_v3	1997542	-	762	-0.244	-0.632	0.144	5.899	-1.277	0.21	0.21	-5.482	SNARE protein, putative	VTI1
4908	PF3D7_1372500	Pf3D7_13_v3	2854544	-	1025	-0.589	-1.527	0.348	1.578	-1.279	0.21	0.21	-5.065	stevor, pseudogene	NA
1933	PF3D7_0730300	Pf3D7_07_v3	1297459	+	3996	-0.432	-1.12	0.257	10.316	-1.282	0.21	0.21	-5.803	transcription factor with AP2 domain(s)	AP2-L
8	mal_rna_13	Pf_M76611	4996	-	30	-0.463	-1.199	0.274	-4.754	-1.277	0.21	0.21	-4.772	unspecified product	RNA13
1168	PF3D7_0520900	Pf3D7_05_v3	857038	+	1440	-0.219	-0.568	0.13	9.118	-1.277	0.211	0.211	-5.742	adenosylhomocysteinase	SAHH
1431	PF3D7_0613500	Pf3D7_06_v3	548280	-	4092	0.696	-0.413	1.805	1.135	1.277	0.211	0.211	-5.092	AP-3 complex subunit beta, putative	NA
96	PF3D7_0105400	Pf3D7_01_v3	226681	-	605	0.594	-0.354	1.541	-2.013	1.274	0.211	0.211	-4.848	conserved Plasmodium protein, unknown function	NA
97	PF3D7_0105400	Pf3D7_01_v3	226681	-	605	0.594	-0.354	1.541	-2.013	1.274	0.211	0.211	-4.848	conserved Plasmodium protein, unknown function	NA
5103	PF3D7_1417800	Pf3D7_14_v3	753389	+	3052	0.423	-0.251	1.096	2.069	1.276	0.211	0.211	-5.116	DNA replication licensing factor MCM2	MCM2
1741	PF3D7_0711000	Pf3D7_07_v3	487281	-	3690	0.334	-0.2	0.867	5.585	1.272	0.212	0.212	-5.46	AAA family ATPase, CDC48 subfamily	Cdc48
876	PF3D7_0417900	Pf3D7_04_v3	790724	+	2262	-0.625	-1.623	0.373	0.585	-1.274	0.212	0.212	-5.026	conserved Plasmodium protein, unknown function	NA
4469	PF3D7_1328300	Pf3D7_13_v3	1196229	-	1281	0.295	-0.177	0.766	4.601	1.271	0.212	0.212	-5.422	conserved Plasmodium protein, unknown function	NA
378	PF3D7_0217200	Pf3D7_02_v3	709799	-	5454	0.474	-0.283	1.23	2.536	1.273	0.212	0.212	-5.129	conserved Plasmodium protein, unknown function	NA
1813	PF3D7_0718300	Pf3D7_07_v3	812301	-	8335	0.668	-0.401	1.738	-2.439	1.271	0.212	0.212	-4.845	cysteine repeat modular protein 2	CRMP2
5659	PF3D7_1472700	Pf3D7_14_v3	2966749	+	2586	-0.622	-1.615	0.371	-2.29	-1.273	0.212	0.212	-4.847	DNA-directed RNA polymerase, alpha subunit, putative	NA
2875	PF3D7_1017900	Pf3D7_10_v3	715878	+	1560	-0.165	-0.429	0.099	6.563	-1.269	0.213	0.213	-5.572	26S proteasome regulatory subunit p55, putative	RPN5
2926	PF3D7_1022900	Pf3D7_10_v3	958939	-	958	0.636	-0.384	1.655	-1.114	1.268	0.213	0.213	-4.904	CDGSH iron-sulfur domain-containing protein, putative	NA
4713	PF3D7_1352400	Pf3D7_13_v3	2087393	+	4785	-0.21	-0.546	0.126	6.06	-1.269	0.213	0.213	-5.53	conserved Plasmodium protein, unknown function	NA
2935	PF3D7_1023800	Pf3D7_10_v3	994322	+	2467	0.577	-0.347	1.501	0.301	1.27	0.213	0.213	-4.981	conserved Plasmodium protein, unknown function	NA
2427	PF3D7_0911900	Pf3D7_09_v3	538221	-	1652	-0.327	-0.851	0.198	10.546	-1.27	0.213	0.213	-5.833	falstatin	ICP
237	PF3D7_0203500	Pf3D7_02_v3	164269	+	72	-0.549	-1.428	0.33	-4.653	-1.271	0.213	0.213	-4.781	tRNA Glutamine	NA
3078	PF3D7_1038000	Pf3D7_10_v3	1505835	+	1062	0.2	-0.121	0.521	9.77	1.267	0.214	0.214	-5.784	antigen UB05	NA
3079	PF3D7_1038000	Pf3D7_10_v3	1505835	+	1062	0.2	-0.121	0.521	9.77	1.267	0.214	0.214	-5.784	antigen UB05	NA
323	PF3D7_0211800	Pf3D7_02_v3	475242	+	1833	-0.187	-0.488	0.114	8.981	-1.266	0.214	0.214	-5.754	asparagine--tRNA ligase	AsnRS
3720	PF3D7_1209500	Pf3D7_12_v3	439711	+	3148	0.734	-0.445	1.912	-2.231	1.265	0.214	0.214	-4.861	cGMP-specific phosphodiesterase	PDE1
3721	PF3D7_1209500	Pf3D7_12_v3	439711	+	3148	0.734	-0.445	1.912	-2.231	1.265	0.214	0.214	-4.861	cGMP-specific phosphodiesterase	PDE1
1577	PF3D7_0627600	Pf3D7_06_v3	1104015	+	1185	-0.38	-0.99	0.23	4.255	-1.267	0.214	0.214	-5.32	conserved Plasmodium protein, unknown function	NA
1261	PF3D7_0530000	Pf3D7_05_v3	1224598	-	294	-0.254	-0.662	0.154	4.82	-1.267	0.214	0.214	-5.358	conserved Plasmodium protein, unknown function	NA
4762	PF3D7_1357400	Pf3D7_13_v3	2276521	+	3540	0.426	-0.258	1.109	4.193	1.267	0.214	0.214	-5.335	conserved Plasmodium protein, unknown function	NA
1195	PF3D7_0523600	Pf3D7_05_v3	978665	+	1206	0.588	-0.356	1.531	-2.11	1.267	0.214	0.214	-4.856	conserved Plasmodium protein, unknown function	NA
411	PF3D7_0220400	Pf3D7_02_v3	820429	+	2113	0.351	-0.212	0.914	4.522	1.267	0.214	0.214	-5.338	DnaJ protein, putative, pseudogene	NA
4068	PF3D7_1244000	Pf3D7_12_v3	1842399	-	3253	0.433	-0.262	1.129	1.291	1.267	0.214	0.214	-5.096	glucose inhibited division protein a homologue, putative	NA
753	PF3D7_0405700	Pf3D7_04_v3	305746	-	7248	0.707	-0.43	1.844	2.524	1.268	0.214	0.214	-5.233	lysine decarboxylase, putative	NA
3575	PF3D7_1145500	Pf3D7_11_v3	1807359	+	2772	0.578	-0.352	1.509	2.161	1.264	0.215	0.215	-5.149	ABC transporter B family member 3, putative	ABCB3
3248	PF3D7_1113800	Pf3D7_11_v3	531177	-	2109	0.353	-0.215	0.922	2.513	1.263	0.215	0.215	-5.162	conserved Plasmodium membrane protein, unknown function	NA
310	PF3D7_0210500	Pf3D7_02_v3	427490	+	4041	0.358	-0.218	0.935	2.11	1.265	0.215	0.215	-5.131	conserved Plasmodium protein, unknown function	NA
2248	PF3D7_0828400	Pf3D7_08_v3	1224094	-	1770	0.568	-0.346	1.482	-1.075	1.264	0.215	0.215	-4.904	mitochondrial inner membrane protein OXA1, putative	OXA1
4353	PF3D7_1316800	Pf3D7_13_v3	698218	-	1705	-0.196	-0.511	0.119	6.499	-1.265	0.215	0.215	-5.559	protein transport protein SEC20, putative	SEC20
3901	PF3D7_1227400	Pf3D7_12_v3	1109151	-	3519	-0.247	-0.645	0.151	6.614	-1.261	0.216	0.216	-5.575	conserved Plasmodium protein, unknown function	NA
497	PF3D7_0305500	Pf3D7_03_v3	261485	-	11802	-0.189	-0.494	0.116	8.467	-1.261	0.216	0.216	-5.728	conserved Plasmodium protein, unknown function	NA
4823	PF3D7_1363500	Pf3D7_13_v3	2547764	+	2714	0.403	-0.247	1.054	2.37	1.26	0.216	0.216	-5.185	DNase I-like protein, putative	NA
3056	PF3D7_1035700	Pf3D7_10_v3	1413200	+	2094	0.519	-0.318	1.357	0.677	1.262	0.216	0.216	-5.039	duffy binding-like merozoite surface protein	DBLMSP
2947	PF3D7_1025000	Pf3D7_10_v3	1045608	-	4153	-0.152	-0.398	0.093	9.219	-1.262	0.216	0.216	-5.756	formin 2, putative	NA
716	PF3D7_0402000	Pf3D7_04_v3	114601	-	1458	0.543	-0.334	1.419	3.656	1.261	0.216	0.216	-5.356	Plasmodium exported protein (PHISTa), unknown function	NA
3615	PF3D7_1149400	Pf3D7_11_v3	1985870	-	770	0.523	-0.321	1.368	1.735	1.26	0.216	0.216	-5.162	Plasmodium exported protein, unknown function	NA
5611	PF3D7_1467900	Pf3D7_14_v3	2771101	+	5208	-0.785	-2.054	0.484	4.382	-1.265	0.216	0.216	-5.339	rab GTPase activator, putative	NA
3195	PF3D7_1108500	Pf3D7_11_v3	367316	+	1508	0.362	-0.222	0.947	3.363	1.26	0.216	0.216	-5.239	succinyl-CoA synthetase alpha subunit, putative	NA
2975	PF3D7_1027800	Pf3D7_10_v3	1153271	-	1161	-0.176	-0.461	0.109	10.649	-1.258	0.217	0.217	-5.856	60S ribosomal protein L3	RPL3
4500	PF3D7_1331200	Pf3D7_13_v3	1306654	+	1346	-0.192	-0.501	0.118	7.54	-1.258	0.217	0.217	-5.658	conserved Plasmodium protein, unknown function	NA
5380	PF3D7_1445000	Pf3D7_14_v3	1849172	-	1221	0.323	-0.199	0.845	1.393	1.259	0.217	0.217	-5.066	conserved Plasmodium protein, unknown function	NA
4451	PF3D7_1326500	Pf3D7_13_v3	1099489	-	6348	0.572	-0.352	1.496	0.604	1.259	0.217	0.217	-5.009	conserved Plasmodium protein, unknown function	NA
3602	PF3D7_1148200	Pf3D7_11_v3	1920268	+	544	0.829	-0.515	2.172	5.511	1.265	0.217	0.217	-5.531	unspecified product	NA
2259	PF3D7_0829500	Pf3D7_08_v3	1260048	-	6651	0.593	-0.367	1.553	1.993	1.257	0.218	0.218	-5.106	conserved Plasmodium protein, unknown function	NA
2151	PF3D7_0818700	Pf3D7_08_v3	848277	-	4671	-0.221	-0.578	0.137	8.465	-1.254	0.218	0.218	-5.727	DNA helicase, putative	NA
2576	PF3D7_0926700	Pf3D7_09_v3	1089911	+	2520	-0.292	-0.765	0.181	6.551	-1.254	0.218	0.218	-5.603	glutamine-dependent NAD(+) synthetase, putative	NADSYN
3246	PF3D7_1113600	Pf3D7_11_v3	527572	+	1131	-0.271	-0.711	0.169	6.583	-1.252	0.219	0.219	-5.578	conserved Plasmodium protein, unknown function	NA
878	PF3D7_0418100	Pf3D7_04_v3	810995	-	3648	-0.209	-0.549	0.131	7.334	-1.252	0.219	0.219	-5.654	conserved Plasmodium protein, unknown function	NA
1500	PF3D7_0620200	Pf3D7_06_v3	846523	-	972	0.644	-0.401	1.688	-2.981	1.253	0.219	0.219	-4.837	conserved Plasmodium protein, unknown function	NA
2698	PF3D7_1000900	Pf3D7_10_v3	60024	+	1342	-0.756	-1.982	0.471	-1.522	-1.253	0.219	0.219	-4.931	erythrocyte membrane protein 1 (PfEMP1), pseudogene	NA
1512	PF3D7_0621350	Pf3D7_06_v3	876679	-	620	-0.403	-1.058	0.252	2.07	-1.253	0.219	0.219	-5.118	protein SYS1, putative	SYS1
1598	PF3D7_0629700	Pf3D7_06_v3	1221941	+	20982	0.183	-0.114	0.479	8.901	1.254	0.219	0.219	-5.75	SET domain protein, putative	SET1
5676	PF3D7_1474500	Pf3D7_14_v3	3055715	-	2106	-0.287	-0.753	0.179	6.408	-1.253	0.219	0.219	-5.567	splicing factor 3A subunit 1, putative	SF3A1
1655	PF3D7_0702600	Pf3D7_07_v3	109915	+	264	0.383	-0.24	1.005	3.741	1.25	0.22	0.22	-5.266	chitinase precursor fragment, truncated	NA
2444	PF3D7_0913700	Pf3D7_09_v3	589263	+	1980	0.375	-0.235	0.985	3.062	1.251	0.22	0.22	-5.264	conserved Plasmodium protein, unknown function	NA
4286	PF3D7_1310200	Pf3D7_13_v3	454061	+	576	0.493	-0.308	1.294	-0.265	1.251	0.22	0.22	-4.947	conserved Plasmodium protein, unknown function	NA
3068	PF3D7_1037000	Pf3D7_10_v3	1462351	+	7205	-0.334	-0.879	0.21	5.657	-1.249	0.22	0.22	-5.486	DNA polymerase zeta catalytic subunit, putative	NA
3280	PF3D7_1116800	Pf3D7_11_v3	636094	-	3418	-0.198	-0.521	0.125	10.214	-1.249	0.22	0.22	-5.846	heat shock protein 101	HSP101
422	PF3D7_0221500	Pf3D7_02_v3	863079	-	764	0.724	-0.455	1.903	-2.297	1.249	0.22	0.22	-4.865	Pfmc-2TM Maurer's cleft two transmembrane protein, pseudogene	NA
5177	PF3D7_1425000	Pf3D7_14_v3	982349	+	172	0.661	-0.414	1.737	-0.29	1.25	0.22	0.22	-4.958	Plasmodium RNA of unknown function RUF4	NA
3459	PF3D7_1134400	Pf3D7_11_v3	1340486	-	1195	0.422	-0.266	1.109	1.747	1.248	0.221	0.221	-5.109	conserved Plasmodium protein, unknown function	NA
4141	PF3D7_1251200	Pf3D7_12_v3	2092087	+	2145	-0.316	-0.831	0.199	3.702	-1.248	0.221	0.221	-5.29	coronin	NA
4919	PF3D7_1400100	Pf3D7_14_v3	1393	+	3951	-0.469	-1.233	0.296	5.151	-1.248	0.221	0.221	-5.444	erythrocyte membrane protein 1 (PfEMP1), pseudogene	NA
4129	PF3D7_1250000	Pf3D7_12_v3	2044120	+	507	-0.199	-0.524	0.125	7.594	-1.248	0.221	0.221	-5.67	rRNA-processing protein, putative	NA
4579	PF3D7_1339100	Pf3D7_13_v3	1575356	+	72	-0.865	-2.274	0.545	-2.637	-1.247	0.221	0.221	-4.852	tRNA Methionine	NA
5187	PF3D7_1426000	Pf3D7_14_v3	1016133	-	486	-0.229	-0.602	0.145	8.823	-1.244	0.222	0.222	-5.768	60S ribosomal protein L21	RPL21
5581	PF3D7_1464900	Pf3D7_14_v3	2630558	-	2121	-0.193	-0.508	0.122	8.211	-1.245	0.222	0.222	-5.722	ATP-dependent zinc metalloprotease FTSH, putative	NA
1323	PF3D7_0603000	Pf3D7_06_v3	122634	+	1779	-0.251	-0.662	0.159	6.361	-1.244	0.222	0.222	-5.566	conserved Plasmodium protein, unknown function	NA
1457	PF3D7_0616100	Pf3D7_06_v3	672119	+	636	0.351	-0.223	0.926	3.633	1.244	0.222	0.222	-5.299	conserved Plasmodium protein, unknown function	NA
47	PF3D7_0100500	Pf3D7_01_v3	53169	-	112	0.832	-0.528	2.193	-3.031	1.244	0.222	0.222	-4.847	erythrocyte membrane protein 1 (PfEMP1), exon 1, pseudogene	NA
544	PF3D7_0310200	Pf3D7_03_v3	427290	+	13653	0.194	-0.123	0.51	9.284	1.244	0.222	0.222	-5.793	phd finger protein, putative	NA
692	PF3D7_0324600	Pf3D7_03_v3	1021998	+	1011	0.672	-0.427	1.77	-2.232	1.244	0.222	0.222	-4.874	stevor	NA
601	PF3D7_0315600	Pf3D7_03_v3	635586	+	1877	0.685	-0.434	1.804	-0.771	1.245	0.222	0.222	-4.947	zinc finger protein, putative	NA
1163	PF3D7_0520400	Pf3D7_05_v3	839655	-	906	0.343	-0.218	0.903	3.144	1.242	0.223	0.223	-5.22	conserved Plasmodium protein, unknown function	NA
2204	PF3D7_0824000	Pf3D7_08_v3	1049282	-	2424	0.587	-0.374	1.548	-2.583	1.242	0.223	0.223	-4.873	conserved Plasmodium protein, unknown function	NA
1942	PF3D7_0731100	Pf3D7_07_v3	1338959	+	2832	-0.215	-0.567	0.137	11.236	-1.243	0.223	0.223	-5.896	EMP1-trafficking protein	PTP2
2054	PF3D7_0809100	Pf3D7_08_v3	459312	+	7256	-0.642	-1.695	0.411	3.789	-1.243	0.223	0.223	-5.305	erythrocyte membrane protein 1, PfEMP1	VAR
5567	PF3D7_1463500	Pf3D7_14_v3	2577974	+	1406	0.228	-0.146	0.602	7.206	1.24	0.223	0.223	-5.628	fam-a protein	NA
4278	PF3D7_1309400	Pf3D7_13_v3	431892	+	3984	0.321	-0.204	0.846	5.086	1.242	0.223	0.223	-5.445	HORMA domain protein, putative	NA
556	PF3D7_0311300	Pf3D7_03_v3	480122	-	3332	0.529	-0.338	1.397	-0.286	1.241	0.223	0.223	-4.974	phosphatidylinositol 3- and 4-kinase, putative	NA
2167	PF3D7_0820300	Pf3D7_08_v3	919055	+	1842	-0.25	-0.661	0.16	8.032	-1.24	0.224	0.224	-5.714	conserved Plasmodium protein, unknown function	NA
3324	PF3D7_1121100	Pf3D7_11_v3	794254	-	5308	0.303	-0.194	0.8	8.551	1.239	0.224	0.224	-5.738	conserved Plasmodium protein, unknown function	NA
430	PF3D7_0222200	Pf3D7_02_v3	881469	-	799	-0.37	-0.977	0.238	5.814	-1.238	0.224	0.224	-5.502	exported protein family 3	EPF3
4179	PF3D7_1255000	Pf3D7_12_v3	2234600	+	1193	-0.677	-1.789	0.435	-1.939	-1.238	0.224	0.224	-4.887	rifin	RIF
4046	PF3D7_1241800	Pf3D7_12_v3	1780012	-	2637	-0.21	-0.556	0.136	9.089	-1.236	0.225	0.225	-5.785	ATP-dependent RNA helicase DBP9, putative	DBP9
2034	PF3D7_0807100	Pf3D7_08_v3	372902	-	3966	-0.286	-0.757	0.185	5.68	-1.235	0.225	0.225	-5.519	ATP-dependent RNA helicase DHH1, putative	DHH1
4003	PF3D7_1237500	Pf3D7_12_v3	1561534	-	5046	-0.231	-0.61	0.149	7.695	-1.237	0.225	0.225	-5.695	conserved Plasmodium protein, unknown function	NA
3830	PF3D7_1220200	Pf3D7_12_v3	804963	-	1736	-0.54	-1.43	0.349	-4.396	-1.235	0.225	0.225	-4.82	conserved Plasmodium protein, unknown function, pseudogene	NA
1637	PF3D7_0700800	Pf3D7_07_v3	48300	+	807	0.868	-0.559	2.294	-3.837	1.237	0.225	0.225	-4.831	Pfmc-2TM Maurer's cleft two transmembrane protein	MC-2TM
2901	PF3D7_1020400	Pf3D7_10_v3	822602	-	1992	-0.225	-0.596	0.145	6.053	-1.236	0.225	0.225	-5.54	rRNA (cytosine-C(5))-methyltransferase, putative	RCM1
3632	PF3D7_1200700	Pf3D7_12_v3	61556	-	2781	-0.243	-0.644	0.158	11.119	-1.235	0.226	0.226	-5.898	acyl-CoA synthetase	ACS7
2108	PF3D7_0814300	Pf3D7_08_v3	690541	-	3603	-0.211	-0.56	0.137	7.733	-1.233	0.226	0.226	-5.694	ATPase, putative	NA
4321	PF3D7_1313600	Pf3D7_13_v3	579526	-	6090	-0.721	-1.911	0.469	-0.073	-1.232	0.226	0.226	-5.002	conserved Plasmodium protein, unknown function	NA
4662	PF3D7_1347400	Pf3D7_13_v3	1895983	+	420	-0.272	-0.719	0.176	2.785	-1.235	0.226	0.226	-5.219	conserved Plasmodium protein, unknown function	NA
2144	PF3D7_0818000	Pf3D7_08_v3	821334	+	1119	-0.307	-0.812	0.199	5.938	-1.233	0.226	0.226	-5.53	conserved protein, unknown function	NA
3238	PF3D7_1112800	Pf3D7_11_v3	486329	+	1338	0.387	-0.251	1.025	1.144	1.235	0.226	0.226	-5.091	conserved protein, unknown function	NA
3853	PF3D7_1222600	Pf3D7_12_v3	907203	+	7299	-0.871	-2.313	0.571	5.721	-1.238	0.226	0.226	-5.493	transcription factor with AP2 domain(s)	AP2-G
4071	PF3D7_1244300	Pf3D7_12_v3	1857849	+	242	-0.595	-1.579	0.389	3.305	-1.232	0.227	0.227	-5.263	ACEA small nucleolar RNA U3	NA
1586	PF3D7_0628500	Pf3D7_06_v3	1179053	-	951	0.321	-0.209	0.852	1.896	1.232	0.227	0.227	-5.125	conserved Plasmodium protein, unknown function	NA
4764	PF3D7_1357600	Pf3D7_13_v3	2284813	+	891	0.448	-0.292	1.188	0.259	1.232	0.227	0.227	-5.013	conserved Plasmodium protein, unknown function	NA
2277	PF3D7_0831300	Pf3D7_08_v3	1339659	+	2648	0.41	-0.268	1.088	4.085	1.23	0.227	0.227	-5.396	Plasmodium exported protein, unknown function	GEXP13
4751	PF3D7_1356300	Pf3D7_13_v3	2231883	+	1366	0.536	-0.349	1.42	0.356	1.232	0.227	0.227	-5.044	ubiquitin-conjugating enzyme, putative	NA
30	malmito_rna_LSUF	Pf_M76611	1516	+	115	0.615	-0.401	1.631	-3.982	1.232	0.227	0.227	-4.828	unspecified product	LSUF
3773	PF3D7_1214600	Pf3D7_12_v3	613561	-	1014	0.218	-0.143	0.58	5.359	1.228	0.228	0.228	-5.491	adrenodoxin-type ferredoxin, putative	NA
3550	PF3D7_1143000	Pf3D7_11_v3	1717546	+	1149	0.694	-0.454	1.842	-2.573	1.229	0.228	0.228	-4.875	alpha/beta hydrolase, putative	NA
1927	PF3D7_0729700	Pf3D7_07_v3	1260154	-	2627	-0.539	-1.43	0.353	-1.535	-1.228	0.228	0.228	-4.925	conserved Plasmodium protein, unknown function	NA
2022	PF3D7_0805900	Pf3D7_08_v3	324279	-	1377	-0.395	-1.049	0.259	3.749	-1.228	0.228	0.228	-5.288	conserved protein, unknown function	NA
2928	PF3D7_1023100	Pf3D7_10_v3	963497	-	17064	-0.433	-1.15	0.284	0.972	-1.229	0.228	0.228	-5.069	dynein heavy chain, putative	NA
2770	PF3D7_1007900	Pf3D7_10_v3	316649	+	1632	-0.197	-0.522	0.129	8.698	-1.229	0.228	0.228	-5.771	eukaryotic translation initiation factor 3 subunit D, putative	EIF3D
663	PF3D7_0321700	Pf3D7_03_v3	903764	-	6355	-0.434	-1.152	0.284	3.605	-1.229	0.228	0.228	-5.299	microtubule and actin binding protein, putative	NA
2860	PF3D7_1016500	Pf3D7_10_v3	661742	-	2460	-0.718	-1.907	0.472	3.403	-1.231	0.228	0.228	-5.282	Plasmodium exported protein (PHISTc), unknown function	NA
3520	PF3D7_1140000	Pf3D7_11_v3	1595767	+	1952	-0.498	-1.325	0.328	0.626	-1.225	0.229	0.229	-5.05	carbonic anhydrase	CA
3429	PF3D7_1131400	Pf3D7_11_v3	1204297	-	5291	-0.657	-1.749	0.434	-2.48	-1.225	0.229	0.229	-4.907	conserved Plasmodium protein, unknown function	NA
4269	PF3D7_1308600	Pf3D7_13_v3	396734	-	4218	0.555	-0.366	1.475	-2.472	1.225	0.229	0.229	-4.895	conserved Plasmodium protein, unknown function	NA
2734	PF3D7_1004300	Pf3D7_10_v3	199452	-	3393	-0.234	-0.621	0.154	9.065	-1.226	0.229	0.229	-5.801	E3 ubiquitin-protein ligase, putative	NA
476	PF3D7_0303400	Pf3D7_03_v3	178420	+	2708	-0.413	-1.099	0.272	3.034	-1.225	0.229	0.229	-5.229	palmitoyltransferase DHHC1	DHHC1
3601	PF3D7_1148100	Pf3D7_11_v3	1916392	+	1659	0.687	-0.453	1.826	-1.59	1.225	0.229	0.229	-4.942	unspecified product	NA
2554	PF3D7_0924500	Pf3D7_09_v3	993245	-	4431	0.43	-0.285	1.146	4.975	1.223	0.23	0.23	-5.462	conserved Plasmodium membrane protein, unknown function	NA
3838	PF3D7_1221100	Pf3D7_12_v3	847437	+	1747	-0.713	-1.899	0.473	-3.384	-1.222	0.23	0.23	-4.862	conserved Plasmodium protein, unknown function	NA
5536	PF3D7_1460500	Pf3D7_14_v3	2466091	+	4899	0.386	-0.256	1.028	3.847	1.223	0.23	0.23	-5.34	conserved Plasmodium protein, unknown function	NA
4029	PF3D7_1240100	Pf3D7_12_v3	1685094	-	318	-0.276	-0.737	0.184	6.452	-1.222	0.23	0.23	-5.586	early transcribed membrane protein 12	ETRAMP12
4732	PF3D7_1354300	Pf3D7_13_v3	2164239	-	3178	-0.158	-0.422	0.105	10.754	-1.223	0.23	0.23	-5.895	large subunit rRNA methyltransferase, putative	NA
3018	PF3D7_1031900	Pf3D7_10_v3	1284588	-	2700	-0.576	-1.537	0.385	0.39	-1.219	0.231	0.231	-5.034	conserved Plasmodium protein, unknown function	NA
2233	PF3D7_0826900	Pf3D7_08_v3	1164655	+	2551	-0.422	-1.125	0.281	5.213	-1.221	0.231	0.231	-5.482	conserved Plasmodium protein, unknown function	NA
1276	PF3D7_0531400	Pf3D7_05_v3	1282591	-	3516	-0.273	-0.728	0.182	5.778	-1.219	0.231	0.231	-5.533	conserved Plasmodium protein, unknown function	NA
923	PF3D7_0422600	Pf3D7_04_v3	1038697	-	423	0.383	-0.255	1.021	2.391	1.221	0.231	0.231	-5.176	conserved Plasmodium protein, unknown function	NA
2495	PF3D7_0918800	Pf3D7_09_v3	772646	-	1734	-0.224	-0.598	0.15	7.225	-1.22	0.231	0.231	-5.671	dihydrouridine synthase, putative	NA
2001	PF3D7_0803800	Pf3D7_08_v3	233467	-	960	0.19	-0.126	0.506	7.742	1.22	0.231	0.231	-5.73	proteasome subunit beta type-4	NA
2139	PF3D7_0817500	Pf3D7_08_v3	798777	+	1429	-0.318	-0.848	0.213	8.559	-1.219	0.231	0.231	-5.783	protein kinase c inhibitor-like protein, putative	NA
293	PF3D7_0208900	Pf3D7_02_v3	360828	+	7527	0.455	-0.304	1.214	1.764	1.218	0.232	0.232	-5.154	6-cysteine protein	P230p
5316	PF3D7_1438600	Pf3D7_14_v3	1562232	+	834	-0.25	-0.668	0.168	5.687	-1.217	0.232	0.232	-5.52	conserved protein, unknown function	NA
1682	PF3D7_0705300	Pf3D7_07_v3	261977	+	2478	0.417	-0.279	1.113	-1.445	1.218	0.232	0.232	-4.946	origin recognition complex subunit 2, putative	ORC2
2282	PF3D7_0831750	Pf3D7_08_v3	1371847	+	874	-0.431	-1.151	0.289	4.091	-1.218	0.232	0.232	-5.361	Plasmodium exported protein (PHISTa), unknown function, pseudogene	NA
3619	PF3D7_1149800	Pf3D7_11_v3	2006706	+	1124	1.016	-0.681	2.713	-2.894	1.219	0.232	0.232	-4.877	rifin	RIF
552	PF3D7_0310900	Pf3D7_03_v3	466085	+	2361	0.351	-0.236	0.937	2.182	1.216	0.233	0.233	-5.18	conserved Plasmodium protein, unknown function	NA
1997	PF3D7_0803400	Pf3D7_08_v3	212252	+	3720	0.515	-0.348	1.379	-0.226	1.214	0.233	0.233	-5.02	DNA repair and recombination protein RAD54, putative	RAD54
4905	PF3D7_1372200	Pf3D7_13_v3	2840727	-	977	-0.396	-1.06	0.269	12.078	-1.217	0.233	0.233	-5.984	histidine-rich protein III	HRPIII
2779	PF3D7_1008800	Pf3D7_10_v3	365737	-	1410	-0.17	-0.455	0.114	9.694	-1.216	0.233	0.233	-5.848	nucleolar protein 5, putative	NOP5
1784	PF3D7_0715300	Pf3D7_07_v3	684539	-	2153	0.585	-0.396	1.567	-3.669	1.212	0.234	0.234	-4.861	calcium/calmodulin-dependent protein kinase, putative	NA
3868	PF3D7_1224100	Pf3D7_12_v3	976820	-	1070	0.838	-0.57	2.245	0.389	1.213	0.234	0.234	-5.068	conserved Plasmodium protein, unknown function	NA
2300	PF3D7_0833300	Pf3D7_08_v3	1429330	+	1185	0.537	-0.365	1.438	2.875	1.211	0.234	0.234	-5.236	erythrocyte membrane protein 1 (PfEMP1), exon 2, pseudogene	NA
1847	PF3D7_0721700	Pf3D7_07_v3	935497	+	1404	-0.34	-0.911	0.231	3.96	-1.212	0.234	0.234	-5.356	secreted ookinete protein, putative	PSOP1
247	PF3D7_0204500	Pf3D7_02_v3	198353	-	1218	-0.281	-0.754	0.191	5.772	-1.21	0.235	0.235	-5.554	aspartate transaminase	AspAT
3463	PF3D7_1134800	Pf3D7_11_v3	1367186	+	1624	-0.166	-0.444	0.113	7.27	-1.209	0.235	0.235	-5.695	coatomer subunit delta	NA
5462	PF3D7_1453200	Pf3D7_14_v3	2179519	+	7113	0.48	-0.327	1.288	-0.68	1.21	0.235	0.235	-4.972	conserved Plasmodium protein, unknown function	NA
4258	PF3D7_1307500	Pf3D7_13_v3	338189	-	267	0.494	-0.337	1.325	-2.532	1.208	0.235	0.235	-4.9	conserved Plasmodium protein, unknown function	NA
53	PF3D7_0101100	Pf3D7_01_v3	69304	-	1114	-0.359	-0.963	0.245	7.448	-1.209	0.235	0.235	-5.698	exported protein family 4	EPF4
3679	PF3D7_1205400	Pf3D7_12_v3	232389	-	3258	-0.285	-0.765	0.194	3.922	-1.211	0.235	0.235	-5.354	kelch domain-containing protein, putative	NA
4291	PF3D7_1310700	Pf3D7_13_v3	468232	-	432	0.506	-0.345	1.357	0.041	1.209	0.235	0.235	-5.027	RNA-binding protein, putative	NA
1496	PF3D7_0619800	Pf3D7_06_v3	831286	-	7748	0.267	-0.183	0.718	4.516	1.206	0.236	0.236	-5.432	conserved Plasmodium membrane protein, unknown function	NA
1730	PF3D7_0709900	Pf3D7_07_v3	438557	-	7325	0.437	-0.298	1.172	1.038	1.208	0.236	0.236	-5.09	conserved Plasmodium membrane protein, unknown function	NA
3329	PF3D7_1121600	Pf3D7_11_v3	815386	-	937	0.186	-0.128	0.499	9.981	1.206	0.236	0.236	-5.879	exported protein 1	EXP1
4777	PF3D7_1358900	Pf3D7_13_v3	2332196	-	2720	0.25	-0.171	0.671	7.449	1.206	0.236	0.236	-5.716	GTP-binding protein, putative	NA
224	PF3D7_0202300	Pf3D7_02_v3	117225	+	1011	0.631	-0.433	1.694	2.517	1.206	0.236	0.236	-5.188	Plasmodium exported protein (hyp11), unknown function	NA
1344	PF3D7_0605100	Pf3D7_06_v3	217240	+	2268	-0.223	-0.599	0.153	8.144	-1.206	0.236	0.236	-5.761	RNA-binding protein, putative	NA
1290	PF3D7_0532800	Pf3D7_05_v3	1324239	-	789	-0.602	-1.617	0.412	-0.98	-1.207	0.236	0.236	-4.962	stevor, pseudogene	NA
152	PF3D7_0110800	Pf3D7_01_v3	417921	+	1687	0.19	-0.13	0.51	7.841	1.208	0.236	0.236	-5.741	transcription initiation factor TFIIB, putative	NA
4287	PF3D7_1310300	Pf3D7_13_v3	455792	-	744	0.329	-0.226	0.883	2.968	1.206	0.236	0.236	-5.279	zinc finger protein, putative	NA
2344	PF3D7_0904100	Pf3D7_09_v3	190858	-	4970	0.282	-0.194	0.759	6.306	1.205	0.237	0.237	-5.615	AP-4 complex subunit epsilon, putative	NA
106	PF3D7_0106300	Pf3D7_01_v3	265208	-	3966	-0.188	-0.505	0.13	9.231	-1.203	0.237	0.237	-5.837	calcium-transporting ATPase	ATP6
805	PF3D7_0410900	Pf3D7_04_v3	490442	-	2934	-0.251	-0.676	0.173	5.436	-1.203	0.237	0.237	-5.551	conserved Plasmodium protein, unknown function	NA
3578	PF3D7_1145800	Pf3D7_11_v3	1814957	-	2748	-0.229	-0.616	0.158	6.138	-1.204	0.237	0.237	-5.593	conserved Plasmodium protein, unknown function	NA
284	PF3D7_0208100	Pf3D7_02_v3	327932	+	7272	0.272	-0.188	0.731	2.638	1.203	0.237	0.237	-5.222	conserved Plasmodium protein, unknown function	NA
4671	PF3D7_1348300	Pf3D7_13_v3	1929091	-	4631	-0.248	-0.667	0.171	6.398	-1.205	0.237	0.237	-5.625	elongation factor Tu, putative	NA
5378	PF3D7_1444800	Pf3D7_14_v3	1844041	-	1577	0.226	-0.155	0.606	10.505	1.204	0.237	0.237	-5.923	fructose-bisphosphate aldolase	FBPA
4442	PF3D7_1325600	Pf3D7_13_v3	1067097	+	589	0.663	-0.457	1.783	-2.718	1.204	0.237	0.237	-4.905	mitochondrial fission 1 protein, putative	FIS1
4534	PF3D7_1334600	Pf3D7_13_v3	1409049	-	897	-0.428	-1.152	0.296	1.368	-1.203	0.237	0.237	-5.127	MSP7-like protein	MSRP3
4151	PF3D7_1252200	Pf3D7_12_v3	2125435	+	1137	0.378	-0.261	1.017	3.961	1.202	0.238	0.238	-5.395	chitinase	CHT1
2255	PF3D7_0829100	Pf3D7_08_v3	1252349	+	1448	0.228	-0.157	0.613	7.833	1.202	0.238	0.238	-5.743	conserved protein, unknown function	NA
5118	PF3D7_1419300	Pf3D7_14_v3	802717	+	765	-0.171	-0.461	0.118	6.329	-1.202	0.238	0.238	-5.619	glutathione S-transferase	GST
3123	PF3D7_1101300	Pf3D7_11_v3	73244	-	1199	0.74	-0.512	1.993	1.039	1.204	0.238	0.238	-5.097	rifin	RIF
137	PF3D7_0109400	Pf3D7_01_v3	374439	-	649	0.277	-0.191	0.745	2.475	1.202	0.238	0.238	-5.251	tubulin-specific chaperone a, putative	NA
2434	PF3D7_0912700	Pf3D7_09_v3	562677	+	258	-0.269	-0.725	0.187	3.476	-1.199	0.239	0.239	-5.314	conserved Plasmodium protein, unknown function	NA
1557	PF3D7_0625700	Pf3D7_06_v3	1042652	-	297	0.321	-0.224	0.867	2.027	1.198	0.239	0.239	-5.178	conserved Plasmodium protein, unknown function	NA
2946	PF3D7_1024900	Pf3D7_10_v3	1040289	-	4716	0.357	-0.248	0.961	1.708	1.199	0.239	0.239	-5.147	conserved Plasmodium protein, unknown function	NA
5083	PF3D7_1415800	Pf3D7_14_v3	640374	+	1146	-0.215	-0.579	0.15	7.21	-1.198	0.239	0.239	-5.693	dimethyladenosine transferase, putative	NA
3765	PF3D7_1213800	Pf3D7_12_v3	590194	-	2241	-0.232	-0.625	0.161	8.366	-1.199	0.239	0.239	-5.79	proline--tRNA ligase	PRS
5078	PF3D7_1415300	Pf3D7_14_v3	615167	+	1014	-0.455	-1.226	0.316	2.162	-1.2	0.239	0.239	-5.231	RNA-binding protein Nova-1, putative	NA
2264	PF3D7_0830000	Pf3D7_08_v3	1280004	+	111	0.578	-0.403	1.559	-0.855	1.197	0.24	0.24	-4.986	5.8S ribosomal RNA	NA
3470	PF3D7_1135300	Pf3D7_11_v3	1381015	-	1230	-0.238	-0.642	0.167	3.525	-1.195	0.24	0.24	-5.314	conserved Plasmodium membrane protein, unknown function	NA
3336	PF3D7_1122300	Pf3D7_11_v3	846929	+	1086	-0.271	-0.73	0.189	4.878	-1.197	0.24	0.24	-5.458	conserved Plasmodium protein, unknown function	NA
1786	PF3D7_0715500	Pf3D7_07_v3	689543	-	515	0.574	-0.401	1.548	-3.906	1.197	0.24	0.24	-4.869	mitochondrial ATP synthase F1, epsilon subunit, putative	NA
1575	PF3D7_0627400	Pf3D7_06_v3	1100277	-	582	-0.268	-0.723	0.187	2.753	-1.197	0.24	0.24	-5.251	mitochondrial import inner membrane translocase subunit TIM22, putative	TIM22
5719	PF3D7_1478800	Pf3D7_14_v3	3242909	-	721	-0.318	-0.858	0.222	4.999	-1.197	0.24	0.24	-5.464	Plasmodium exported protein, unknown function	NA
5003	PF3D7_1408200	Pf3D7_14_v3	300725	-	5109	-0.186	-0.501	0.13	8.308	-1.196	0.24	0.24	-5.784	transcription factor with AP2 domain(s), putative	AP2-G2
2803	PF3D7_1011200	Pf3D7_10_v3	436958	+	751	-0.29	-0.785	0.204	3.87	-1.193	0.241	0.241	-5.369	conserved Plasmodium protein, unknown function	NA
2804	PF3D7_1011200	Pf3D7_10_v3	436958	+	751	-0.29	-0.785	0.204	3.87	-1.193	0.241	0.241	-5.369	conserved Plasmodium protein, unknown function	NA
1848	PF3D7_0721800	Pf3D7_07_v3	938279	+	617	-0.242	-0.654	0.17	6.092	-1.195	0.241	0.241	-5.613	conserved Plasmodium protein, unknown function	NA
4706	PF3D7_1351800	Pf3D7_13_v3	2065373	+	1037	-0.219	-0.593	0.154	5.369	-1.194	0.241	0.241	-5.524	conserved Plasmodium protein, unknown function	NA
4707	PF3D7_1351800	Pf3D7_13_v3	2065373	+	1037	-0.219	-0.593	0.154	5.369	-1.194	0.241	0.241	-5.524	conserved Plasmodium protein, unknown function	NA
2755	PF3D7_1006400	Pf3D7_10_v3	267219	-	2613	0.52	-0.365	1.406	1.394	1.195	0.241	0.241	-5.14	conserved Plasmodium protein, unknown function	NA
5398	PF3D7_1446800	Pf3D7_14_v3	1922959	+	824	0.534	-0.375	1.442	-0.913	1.194	0.241	0.241	-4.996	heme detoxification protein	HDP
1201	PF3D7_0524200	Pf3D7_05_v3	1008636	-	769	-0.297	-0.803	0.21	1.039	-1.192	0.242	0.242	-5.115	conserved Plasmodium membrane protein, unknown function	NA
5306	PF3D7_1437600	Pf3D7_14_v3	1523286	+	1761	-0.619	-1.676	0.439	-2.178	-1.19	0.242	0.242	-4.928	conserved Plasmodium protein, unknown function	NA
4778	PF3D7_1359000	Pf3D7_13_v3	2336005	-	9846	-0.211	-0.57	0.149	7.83	-1.192	0.242	0.242	-5.754	conserved Plasmodium protein, unknown function	NA
4329	PF3D7_1314400	Pf3D7_13_v3	621387	-	490	0.563	-0.398	1.523	0.067	1.192	0.242	0.242	-5.047	conserved Plasmodium protein, unknown function	NA
[truncated: 3,801 more rows]

## Sheet: significant_up
	GeneID	Chr	Start	Strand	Length	logFC	CI.L	CI.R	AveExpr	t	P.Value	adj.P.Val	B	[Product Description]	[Gene Name or Symbol]
4987	PF3D7_1406600	Pf3D7_14_v3	239747	+	4026	1.79	1.083	2.496	0.6	5.15	1.15e-05	1.15e-05	3.023	ATP-dependent Clp protease regulatory subunit ClpC, putative	ClpC
599	PF3D7_0315400	Pf3D7_03_v3	630611	-	771	1.859	1.11	2.608	0.185	5.049	1.55e-05	1.55e-05	2.76	conserved Plasmodium protein, unknown function	NA
2839	PF3D7_1014700	Pf3D7_10_v3	595308	+	915	0.927	0.539	1.316	4.259	4.851	2.77e-05	2.77e-05	2.494	prohibitin, putative	NA
3173	PF3D7_1106300	Pf3D7_11_v3	263604	-	2967	1.715	0.981	2.449	3.037	4.75	3.74e-05	3.74e-05	2.207	exonuclease, putative	NA
611	PF3D7_0316500	Pf3D7_03_v3	667006	+	1386	2.038	1.151	2.924	-0.271	4.674	4.68e-05	4.68e-05	1.743	kinetochore protein NUF2, putative	NUF2
2334	PF3D7_0903200	Pf3D7_09_v3	133762	-	1826	1.257	0.699	1.815	4.998	4.584	6.1e-05	6.1e-05	1.761	ras-related protein RAB7	RAB7
5630	PF3D7_1469800	Pf3D7_14_v3	2865024	-	1222	1.424	0.787	2.061	2.146	4.544	6.85e-05	6.85e-05	1.626	conserved Plasmodium protein, unknown function	NA
1589	PF3D7_0628800	Pf3D7_06_v3	1185996	-	2649	1.701	0.936	2.467	-0.154	4.519	7.38e-05	7.38e-05	1.395	glutamyl-tRNA(Gln) amidotransferase subunit B	GATB
3708	PF3D7_1208300	Pf3D7_12_v3	388545	+	603	1.461	0.797	2.126	1.912	4.474	8.42e-05	8.42e-05	1.437	mitochondrial ACP precursor, putative	NA
3069	PF3D7_1037100	Pf3D7_10_v3	1469990	-	2238	1.323	0.714	1.931	3.745	4.421	9.83e-05	9.83e-05	1.335	pyruvate kinase 2	PyKII
3534	PF3D7_1141400	Pf3D7_11_v3	1663621	+	1630	2.107	1.134	3.08	-1.189	4.403	0.000103	0.000103	1.044	phosphatidylinositol N-acetylglucosaminyltransferase subunit H, putative	PIGH
3726	PF3D7_1210000	Pf3D7_12_v3	452595	+	1234	1.602	0.842	2.363	-0.372	4.286	0.000145	0.000145	0.821	50S ribosomal protein L1, apicoplast, putative	RPL1
3949	PF3D7_1232100	Pf3D7_12_v3	1328311	-	3061	0.93	0.487	1.374	4.176	4.264	0.000155	0.000155	0.912	60 kDa chaperonin	CPN60
1374	PF3D7_0608100	Pf3D7_06_v3	337792	+	3969	0.923	0.481	1.365	5.486	4.246	0.000163	0.000163	0.841	conserved Plasmodium protein, unknown function	NA
2582	PF3D7_0927300	Pf3D7_09_v3	1113958	+	2046	1.596	0.818	2.375	-0.36	4.169	0.000204	0.000204	0.534	fumarate hydratase, putative	FH
1841	PF3D7_0721100	Pf3D7_07_v3	916434	+	735	1.294	0.66	1.929	3.681	4.148	0.000217	0.000217	0.612	conserved Plasmodium protein, unknown function	NA
86	PF3D7_0104400	Pf3D7_01_v3	202536	+	1608	0.856	0.426	1.286	4.411	4.047	0.000289	0.000289	0.356	4-hydroxy-3-methylbut-2-enyl diphosphate reductase	LytB
5397	PF3D7_1446700	Pf3D7_14_v3	1919583	-	2063	1.487	0.734	2.24	0.885	4.017	0.000315	0.000315	0.251	conserved Plasmodium protein, unknown function	NA
3065	PF3D7_1036700	Pf3D7_10_v3	1445916	-	1580	1.191	0.577	1.804	2.25	3.946	0.000385	0.000385	0.104	phosducin-like protein, putative	PhLP2
5632	PF3D7_1470000	Pf3D7_14_v3	2868291	-	1066	1.188	0.567	1.809	-0.099	3.888	0.000455	0.000455	-0.103	autophagy-related protein 12, putative	ATG12
4220	PF3D7_1303800	Pf3D7_13_v3	184845	-	27816	1.259	0.6	1.919	1.164	3.883	0.000462	0.000462	-0.08	conserved Plasmodium protein, unknown function	NA
5332	PF3D7_1440200	Pf3D7_14_v3	1639477	+	7691	1.361	0.64	2.083	0.889	3.835	0.000528	0.000528	-0.192	stromal-processing peptidase, putative	SPP
3776	PF3D7_1214900	Pf3D7_12_v3	618764	+	1348	1.185	0.55	1.821	1.064	3.793	0.000595	0.000595	-0.287	conserved Plasmodium membrane protein, unknown function	NA
3172	PF3D7_1106200	Pf3D7_11_v3	260867	+	2465	1.49	0.691	2.289	-0.863	3.792	0.000596	0.000596	-0.365	conserved Plasmodium protein, unknown function	NA
837	PF3D7_0414100	Pf3D7_04_v3	634029	-	4877	2.127	0.983	3.271	-2.003	3.78	0.000617	0.000617	-0.442	conserved Plasmodium membrane protein, unknown function	NA
1905	PF3D7_0727600	Pf3D7_07_v3	1167441	+	3377	1.32	0.609	2.032	1.33	3.775	0.000625	0.000625	-0.326	conserved Plasmodium protein, unknown function	NA
487	PF3D7_0304500	Pf3D7_03_v3	219117	-	756	1.377	0.635	2.119	1.521	3.775	0.000626	0.000626	-0.332	1-cys-glutaredoxin-like protein-1	GLP1
2278	PF3D7_0831400	Pf3D7_08_v3	1344405	-	1083	1.197	0.549	1.846	4.737	3.755	0.000661	0.000661	-0.436	Plasmodium exported protein, unknown function	NA
2224	PF3D7_0826000	Pf3D7_08_v3	1109276	+	3519	1.015	0.465	1.565	2.814	3.752	0.000666	0.000666	-0.38	conserved Plasmodium protein, unknown function	NA
3522	PF3D7_1140200	Pf3D7_11_v3	1601257	-	1822	1.085	0.496	1.674	5.612	3.746	0.000678	0.000678	-0.507	conserved Plasmodium protein, unknown function	NA
4212	PF3D7_1303100	Pf3D7_13_v3	159024	+	892	0.965	0.438	1.492	3.827	3.724	0.000722	0.000722	-0.489	methyltransferase-like protein, putative	NA
4368	PF3D7_1318300	Pf3D7_13_v3	753910	+	5523	1.299	0.589	2.009	3.175	3.72	0.000729	0.000729	-0.47	conserved Plasmodium protein, unknown function	NA
3995	PF3D7_1236700	Pf3D7_12_v3	1529821	-	1527	1.169	0.529	1.808	2.032	3.717	0.000735	0.000735	-0.46	S-adenosyl-methyltransferase, putative	NA
3398	PF3D7_1128400	Pf3D7_11_v3	1104216	-	2290	0.846	0.383	1.309	5.484	3.714	0.000741	0.000741	-0.553	geranylgeranyl pyrophosphate synthase, putative	GGPPS
1317	PF3D7_0602400	Pf3D7_06_v3	101385	-	3177	1.029	0.463	1.595	3.589	3.698	0.000776	0.000776	-0.518	elongation factor G	EF-G
380	PF3D7_0217400	Pf3D7_02_v3	717692	+	590	0.788	0.353	1.224	3.012	3.679	0.000818	0.000818	-0.559	conserved Plasmodium protein, unknown function	NA
2130	PF3D7_0816600	Pf3D7_08_v3	762118	-	3213	0.934	0.416	1.452	5.087	3.667	0.000846	0.000846	-0.686	chaperone protein ClpB1	ClpB1
610	PF3D7_0316400	Pf3D7_03_v3	662126	-	3027	1.376	0.612	2.139	0.195	3.664	0.000852	0.000852	-0.613	conserved Plasmodium protein, unknown function	NA
5286	PF3D7_1435700	Pf3D7_14_v3	1445085	-	4407	1.36	0.602	2.118	2.651	3.648	0.00089	0.00089	-0.644	ataxin-2 like protein, putative	NA
5287	PF3D7_1435700	Pf3D7_14_v3	1445085	-	4407	1.36	0.602	2.118	2.651	3.648	0.00089	0.00089	-0.644	ataxin-2 like protein, putative	NA
5364	PF3D7_1443400	Pf3D7_14_v3	1776958	-	2649	0.886	0.388	1.384	2.878	3.621	0.00096	0.00096	-0.705	WD repeat-containing protein	WLP1
2895	PF3D7_1019800	Pf3D7_10_v3	804328	-	3255	1.322	0.578	2.065	1.731	3.616	0.000975	0.000975	-0.706	tRNA methyltransferase, putative	NA
3389	PF3D7_1127600	Pf3D7_11_v3	1071752	+	2062	1.283	0.559	2.007	2.15	3.603	0.00101	0.00101	-0.739	CRAL/TRIO domain-containing protein, putative	NA
1219	PF3D7_0526000	Pf3D7_05_v3	1075913	-	2421	1.141	0.494	1.788	3.349	3.586	0.00106	0.00106	-0.807	RAP protein, putative	NA
3448	PF3D7_1133300	Pf3D7_11_v3	1290501	+	1101	1.439	0.621	2.256	-2.329	3.58	0.00108	0.00108	-0.928	LEM3/CDC50 family protein, putative	NA
3735	PF3D7_1210900	Pf3D7_12_v3	480593	+	2214	1.015	0.437	1.593	0.873	3.569	0.00111	0.00111	-0.84	GPI mannosyltransferase 1	PIGM
1809	PF3D7_0717800	Pf3D7_07_v3	767357	-	4593	0.931	0.4	1.463	3.051	3.564	0.00112	0.00112	-0.84	conserved Plasmodium protein, unknown function	NA
4977	PF3D7_1405600	Pf3D7_14_v3	193216	-	1050	1.051	0.45	1.653	3.02	3.555	0.00115	0.00115	-0.86	ribonucleoside-diphosphate reductase small chain, putative	RNR
1896	PF3D7_0726700	Pf3D7_07_v3	1143303	-	513	0.988	0.419	1.557	0.141	3.532	0.00123	0.00123	-0.92	conserved Plasmodium protein, unknown function	NA
4988	PF3D7_1406700	Pf3D7_14_v3	244908	+	585	1.433	0.608	2.259	-0.891	3.53	0.00123	0.00123	-0.961	vacuolar protein sorting-associated protein 29	VPS29
5414	PF3D7_1448400	Pf3D7_14_v3	1980319	-	2789	1.083	0.455	1.712	1.591	3.505	0.00132	0.00132	-0.969	ubiquitin-protein ligase, putative	HRD3
5629	PF3D7_1469700	Pf3D7_14_v3	2863914	+	618	1.475	0.613	2.337	-1.664	3.479	0.00142	0.00142	-1.106	mediator of RNA polymerase II transcription subunit 6, putative	MED6
2353	PF3D7_0905000	Pf3D7_09_v3	234501	-	846	1.612	0.669	2.555	-1.839	3.477	0.00143	0.00143	-1.142	conserved Plasmodium protein, unknown function	NA
5365	PF3D7_1443500	Pf3D7_14_v3	1780992	-	2589	1.786	0.74	2.832	0.514	3.472	0.00145	0.00145	-1.051	poly(A)-specific ribonuclease PARN, putative	PARN
1797	PF3D7_0716600	Pf3D7_07_v3	725296	+	1924	1.634	0.673	2.594	0.971	3.459	0.0015	0.0015	-1.079	cysteine desulfurase	SufS
4616	PF3D7_1342800	Pf3D7_13_v3	1679693	+	1752	0.822	0.338	1.307	5.869	3.451	0.00153	0.00153	-1.251	phosphoenolpyruvate carboxykinase	PEPCK
719	PF3D7_0402300	Pf3D7_04_v3	137640	+	9014	1.106	0.452	1.759	1.829	3.441	0.00158	0.00158	-1.119	reticulocyte binding protein homologue 1	RH1
2327	PF3D7_0902500	Pf3D7_09_v3	109334	-	1996	0.507	0.206	0.808	8.647	3.427	0.00164	0.00164	-1.444	serine/threonine protein kinase, FIKK family	FIKK9.6
2493	PF3D7_0918600	Pf3D7_09_v3	764848	+	2187	0.835	0.339	1.33	2.349	3.424	0.00165	0.00165	-1.164	ATP-dependent DNA helicase Q1	RECQ1
4584	PF3D7_1339600	Pf3D7_13_v3	1588404	+	1887	0.835	0.339	1.331	3.467	3.423	0.00165	0.00165	-1.2	conserved Plasmodium protein, unknown function	NA
3724	PF3D7_1209800	Pf3D7_12_v3	447381	-	570	1.246	0.505	1.986	1.686	3.419	0.00167	0.00167	-1.172	ATP synthase mitochondrial F1 complex assembly factor 1, putative	ATP11
3780	PF3D7_1215300	Pf3D7_12_v3	629009	-	659	1.336	0.537	2.134	1.82	3.401	0.00175	0.00175	-1.223	10 kDa chaperonin	CPN10
5631	PF3D7_1469900	Pf3D7_14_v3	2866358	+	1826	1.378	0.547	2.21	-0.133	3.372	0.0019	0.0019	-1.291	conserved Plasmodium protein, unknown function	NA
4137	PF3D7_1250800	Pf3D7_12_v3	2077718	+	5170	0.543	0.215	0.872	7.655	3.367	0.00193	0.00193	-1.564	DNA repair protein rhp16, putative	NA
612	PF3D7_0316600	Pf3D7_03_v3	669302	-	1572	1.356	0.541	2.171	8.693	3.402	0.00196	0.00196	-1.626	formate-nitrite transporter	FNT
4044	PF3D7_1241600	Pf3D7_12_v3	1774901	+	1682	1.3	0.509	2.091	-0.172	3.341	0.00206	0.00206	-1.358	mitochondrial carrier protein, putative	NA
1810	PF3D7_0717900	Pf3D7_07_v3	772951	-	2314	0.928	0.361	1.495	3.806	3.328	0.00214	0.00214	-1.442	thioredoxin-like protein	NA
4858	PF3D7_1367000	Pf3D7_13_v3	2679415	-	1011	0.725	0.28	1.169	5.362	3.316	0.00221	0.00221	-1.538	suppressor of kinetochore protein 1, putative	SKP1
5108	PF3D7_1418300	Pf3D7_14_v3	776672	+	411	0.96	0.371	1.549	2.343	3.316	0.00221	0.00221	-1.421	calmodulin, putative	NA
2800	PF3D7_1010900	Pf3D7_10_v3	426601	+	1546	0.812	0.313	1.31	4.147	3.309	0.00225	0.00225	-1.492	conserved Plasmodium protein, unknown function	NA
872	PF3D7_0417500	Pf3D7_04_v3	777200	-	2225	1.046	0.403	1.69	0.83	3.307	0.00226	0.00226	-1.428	memo-like protein	NA
4312	PF3D7_1312700	Pf3D7_13_v3	532270	-	1689	1.028	0.396	1.66	2.38	3.306	0.00227	0.00227	-1.452	probable protein, unknown function	NA
1095	PF3D7_0513600	Pf3D7_05_v3	574941	-	3565	1.259	0.487	2.031	5.573	3.324	0.00228	0.00228	-1.618	deoxyribodipyrimidine photo-lyase, putative	NA
3596	PF3D7_1147700	Pf3D7_11_v3	1897204	+	681	1.647	0.625	2.668	-1.326	3.278	0.00244	0.00244	-1.528	mitochondrial ATP synthase delta subunit, putative	NA
4875	PF3D7_1368700	Pf3D7_13_v3	2727425	-	1731	0.82	0.311	1.329	3.179	3.277	0.00245	0.00245	-1.555	mitochondrial carrier protein, putative	NA
2611	PF3D7_0930100	Pf3D7_09_v3	1191787	-	3453	1.139	0.432	1.847	1.945	3.274	0.00247	0.00247	-1.51	conserved Plasmodium protein, unknown function	NA
3395	PF3D7_1128100	Pf3D7_11_v3	1094909	-	1023	0.517	0.196	0.839	6.2	3.27	0.00249	0.00249	-1.724	prefoldin subunit 5, putative	NA
5355	PF3D7_1442500	Pf3D7_14_v3	1724402	-	3012	0.752	0.281	1.223	3.48	3.244	0.00267	0.00267	-1.626	geranylgeranyl transferase type-2 subunit alpha, putative	NA
3543	PF3D7_1142300	Pf3D7_11_v3	1695507	+	5752	1.158	0.431	1.886	4.966	3.241	0.00273	0.00273	-1.712	conserved Plasmodium membrane protein, unknown function	NA
2389	PF3D7_0908300	Pf3D7_09_v3	383650	-	2067	1.561	0.58	2.542	-0.72	3.237	0.00273	0.00273	-1.607	conserved protein, unknown function	NA
2390	PF3D7_0908300	Pf3D7_09_v3	383650	-	2067	1.561	0.58	2.542	-0.72	3.237	0.00273	0.00273	-1.607	conserved protein, unknown function	NA
1254	PF3D7_0529400	Pf3D7_05_v3	1199165	+	6023	0.681	0.252	1.11	4.968	3.226	0.00281	0.00281	-1.761	conserved Plasmodium protein, unknown function	NA
1255	PF3D7_0529400	Pf3D7_05_v3	1199165	+	6023	0.681	0.252	1.11	4.968	3.226	0.00281	0.00281	-1.761	conserved Plasmodium protein, unknown function	NA
2738	PF3D7_1004700	Pf3D7_10_v3	220018	-	1336	1.299	0.48	2.118	0.504	3.225	0.00281	0.00281	-1.612	conserved Plasmodium protein, unknown function	NA
600	PF3D7_0315500	Pf3D7_03_v3	632846	-	699	1.682	0.621	2.744	-2.36	3.223	0.00283	0.00283	-1.678	mitochondrial ribosomal protein L29/L47 precursor, putative	NA
3681	PF3D7_1205600	Pf3D7_12_v3	249336	-	2064	0.886	0.325	1.446	5.835	3.214	0.0029	0.0029	-1.84	conserved Plasmodium protein, unknown function	NA
1802	PF3D7_0717100	Pf3D7_07_v3	742010	+	2892	1.137	0.417	1.857	1.626	3.213	0.00291	0.00291	-1.646	conserved Plasmodium protein, unknown function	NA
2365	PF3D7_0906000	Pf3D7_09_v3	298665	-	5515	0.89	0.325	1.454	3.323	3.206	0.00296	0.00296	-1.713	exoribonuclease II	RNaseII
745	PF3D7_0404900	Pf3D7_04_v3	267244	-	1137	0.719	0.262	1.175	5.373	3.202	0.00299	0.00299	-1.812	6-cysteine protein	P41
5094	PF3D7_1416900	Pf3D7_14_v3	685437	-	932	0.913	0.332	1.494	2.413	3.198	0.00302	0.00302	-1.695	prefoldin subunit 2, putative	NA
2673	PF3D7_0936200	Pf3D7_09_v3	1433332	-	777	1.28	0.463	2.097	4.12	3.19	0.00315	0.00315	-1.81	Plasmodium exported protein (hyp11), unknown function	NA
2351	PF3D7_0904800	Pf3D7_09_v3	222271	+	1886	0.834	0.3	1.368	4.784	3.175	0.00321	0.00321	-1.874	replication protein A1, small fragment	RPA1
3892	PF3D7_1226500	Pf3D7_12_v3	1072459	+	4518	0.748	0.266	1.229	2.389	3.158	0.00336	0.00336	-1.784	RAP protein, putative	NA
5093	PF3D7_1416800	Pf3D7_14_v3	682778	+	2025	1.056	0.375	1.737	1.587	3.154	0.00339	0.00339	-1.782	lysine--tRNA ligase, putative	NA
172	PF3D7_0112900	Pf3D7_01_v3	486500	+	687	1.221	0.434	2.008	4.368	3.156	0.00343	0.00343	-1.89	Plasmodium exported protein, unknown function	NA
1398	PF3D7_0610400	Pf3D7_06_v3	444747	+	411	1.302	0.461	2.142	1.845	3.15	0.00343	0.00343	-1.79	histone H3	H3
2850	PF3D7_1015600	Pf3D7_10_v3	627044	-	1997	0.891	0.314	1.469	4.879	3.14	0.00352	0.00352	-1.982	heat shock protein 60	HSP60
5351	PF3D7_1442100	Pf3D7_14_v3	1706520	-	993	1.141	0.401	1.881	1.196	3.137	0.00355	0.00355	-1.814	replication factor A protein 3, putative	RPA3
1087	PF3D7_0512800	Pf3D7_05_v3	548406	-	4935	0.909	0.318	1.5	3.147	3.129	0.00363	0.00363	-1.896	conserved Plasmodium protein, unknown function	NA
1174	PF3D7_0521500	Pf3D7_05_v3	878068	+	1695	1.06	0.371	1.749	4.076	3.129	0.00363	0.00363	-1.915	ribosomal large subunit pseudouridylate synthase, putative	NA
5266	PF3D7_1433700	Pf3D7_14_v3	1342484	-	6511	1.106	0.383	1.828	1.345	3.111	0.0038	0.0038	-1.867	conserved Plasmodium protein, unknown function	NA
522	PF3D7_0308000	Pf3D7_03_v3	353549	+	1497	1.617	0.559	2.675	-1.045	3.107	0.00384	0.00384	-1.878	DNA polymerase delta small subunit, putative	NA
2203	PF3D7_0823900	Pf3D7_08_v3	1047551	+	957	0.896	0.307	1.485	3.364	3.095	0.00396	0.00396	-1.973	dicarboxylate/tricarboxylate carrier	DTC
316	PF3D7_0211100	Pf3D7_02_v3	451751	+	3366	1.316	0.451	2.18	0.89	3.095	0.00397	0.00397	-1.899	conserved Plasmodium protein, unknown function	NA
3229	PF3D7_1111900	Pf3D7_11_v3	457936	+	1262	1.454	0.496	2.411	-1.831	3.087	0.00405	0.00405	-1.938	conserved Plasmodium protein, unknown function	NA
2128	PF3D7_0816400	Pf3D7_08_v3	757224	+	984	1.571	0.535	2.606	-2.732	3.085	0.00407	0.00407	-1.966	EF-hand calcium-binding domain-containing protein	NA
1918	PF3D7_0728800	Pf3D7_07_v3	1230589	+	1592	1.165	0.391	1.94	0.961	3.061	0.00433	0.00433	-1.977	conserved Plasmodium protein, unknown function	NA
833	PF3D7_0413700	Pf3D7_04_v3	619786	-	1017	0.801	0.268	1.333	3.939	3.059	0.00436	0.00436	-2.083	lysine decarboxylase-like protein, putative	NA
562	PF3D7_0311900	Pf3D7_03_v3	509291	-	2307	1.244	0.416	2.071	0.468	3.057	0.00438	0.00438	-1.978	conserved Plasmodium protein, unknown function	NA
3930	PF3D7_1230200	Pf3D7_12_v3	1245535	+	3636	1.185	0.394	1.976	2.68	3.047	0.00449	0.00449	-2.056	vacuolar transporter chaperone, putative, pseudogene	NA
2246	PF3D7_0828200	Pf3D7_08_v3	1216271	+	4446	0.773	0.255	1.29	4.989	3.038	0.0046	0.0046	-2.208	leucine--tRNA ligase, putative	NA
4077	PF3D7_1244900	Pf3D7_12_v3	1877039	+	3003	0.938	0.309	1.567	1.567	3.034	0.00464	0.00464	-2.034	conserved Plasmodium protein, unknown function	NA
5331	PF3D7_1440100	Pf3D7_14_v3	1633211	-	3045	1.589	0.522	2.656	-0.817	3.028	0.00472	0.00472	-2.043	conserved Plasmodium protein, unknown function	NA
5204	PF3D7_1427600	Pf3D7_14_v3	1085603	+	1437	1.035	0.338	1.733	1.446	3.018	0.00484	0.00484	-2.077	CorA-like Mg2+ transporter protein, putative	MIT3
991	PF3D7_0503200	Pf3D7_05_v3	130453	+	2940	0.994	0.324	1.664	1.281	3.017	0.00485	0.00485	-2.067	conserved Plasmodium protein, unknown function	NA
1088	PF3D7_0512900	Pf3D7_05_v3	553990	+	798	0.945	0.306	1.585	1.029	3.005	0.005	0.005	-2.1	AKAP-like protein	AKAL
3216	PF3D7_1110600	Pf3D7_11_v3	425904	-	961	1.075	0.347	1.803	0.318	3.002	0.00504	0.00504	-2.093	mitochondrial ribosomal protein L11 precursor, putative	NA
2114	PF3D7_0815000	Pf3D7_08_v3	709333	-	1268	1.471	0.474	2.468	1.597	3.001	0.0051	0.0051	-2.127	selenoprotein	Sel3
1821	PF3D7_0719100	Pf3D7_07_v3	838990	-	1035	0.76	0.241	1.279	2.64	2.976	0.00539	0.00539	-2.202	conserved Plasmodium protein, unknown function	NA
1340	PF3D7_0604700	Pf3D7_06_v3	204640	-	1568	1.099	0.348	1.851	0.232	2.977	0.00539	0.00539	-2.148	glyoxalase I	GILP
618	PF3D7_0317200	Pf3D7_03_v3	690154	-	4662	0.779	0.245	1.312	3.352	2.968	0.00551	0.00551	-2.263	cdc2-related protein kinase 4	CRK4
956	PF3D7_0425800	Pf3D7_04_v3	1156423	+	11399	1.628	0.513	2.742	4.428	2.981	0.00562	0.00562	-2.295	erythrocyte membrane protein 1, PfEMP1	VAR
2519	PF3D7_0921100	Pf3D7_09_v3	861392	+	1393	1.202	0.376	2.028	0.981	2.958	0.00565	0.00565	-2.195	conserved Plasmodium protein, unknown function	NA
608	PF3D7_0316300	Pf3D7_03_v3	658272	+	3372	1.4	0.437	2.363	3.279	2.962	0.00576	0.00576	-2.309	inorganic pyrophosphatase, putative	NA
609	PF3D7_0316300	Pf3D7_03_v3	658272	+	3372	1.4	0.437	2.363	3.279	2.962	0.00576	0.00576	-2.309	inorganic pyrophosphatase, putative	NA
4090	PF3D7_1246200	Pf3D7_12_v3	1920784	+	1131	1.062	0.329	1.794	4.362	2.948	0.0058	0.0058	-2.357	actin I	ACT1
4531	PF3D7_1334300	Pf3D7_13_v3	1400897	-	1380	1.154	0.358	1.95	2.788	2.947	0.00581	0.00581	-2.284	MSP7-like protein	MSRP5
2240	PF3D7_0827600	Pf3D7_08_v3	1187623	-	5303	0.978	0.3	1.655	2.193	2.933	0.00602	0.00602	-2.293	conserved Plasmodium protein, unknown function	NA
3962	PF3D7_1233300	Pf3D7_12_v3	1375346	+	4242	1.273	0.387	2.159	-0.222	2.921	0.00621	0.00621	-2.262	pentatricopeptide repeat domain-containing protein, putative	NA
129	PF3D7_0108600	Pf3D7_01_v3	349995	-	1632	0.596	0.181	1.012	4.602	2.917	0.00627	0.00627	-2.413	conserved Plasmodium protein, unknown function	NA
1444	PF3D7_0614800	Pf3D7_06_v3	615297	-	1314	1.338	0.404	2.272	1.395	2.913	0.00634	0.00634	-2.319	endonuclease III homologue, putative	NA
2733	PF3D7_1004200	Pf3D7_10_v3	187669	-	9286	0.74	0.223	1.258	5.833	2.911	0.00637	0.00637	-2.551	WD repeat-containing protein, putative	NA
2644	PF3D7_0933300	Pf3D7_09_v3	1320345	+	2949	1.103	0.333	1.874	1.297	2.911	0.00637	0.00637	-2.302	conserved Plasmodium protein, unknown function	NA
102	PF3D7_0105900	Pf3D7_01_v3	253584	+	1347	1.314	0.396	2.231	-1.474	2.911	0.00637	0.00637	-2.292	DNA binding protein, putative	NA
5277	PF3D7_1434800	Pf3D7_14_v3	1410139	+	759	0.808	0.243	1.373	3.891	2.909	0.00641	0.00641	-2.455	mitochondrial acidic protein MAM33, putative	NA
4575	PF3D7_1338700	Pf3D7_13_v3	1561255	-	1869	0.928	0.278	1.577	0.403	2.906	0.00646	0.00646	-2.301	conserved Plasmodium protein, unknown function	NA
165	PF3D7_0112200	Pf3D7_01_v3	464726	+	5469	1.035	0.311	1.76	3.596	2.905	0.00646	0.00646	-2.445	multidrug resistance-associated protein 1	MRP1
3912	PF3D7_1228500	Pf3D7_12_v3	1158554	+	1509	1.149	0.344	1.954	1.541	2.903	0.0065	0.0065	-2.318	RNA pseudouridylate synthase, putative	NA
2737	PF3D7_1004600	Pf3D7_10_v3	215717	+	4043	1.351	0.403	2.298	1.536	2.899	0.00656	0.00656	-2.326	conserved Plasmodium membrane protein, unknown function	NA
4268	PF3D7_1308500	Pf3D7_13_v3	393857	-	1080	1.357	0.402	2.311	-0.888	2.891	0.0067	0.0067	-2.322	conserved Plasmodium protein, unknown function	NA
2660	PF3D7_0934900	Pf3D7_09_v3	1364256	-	1744	0.684	0.202	1.166	5.318	2.885	0.00681	0.00681	-2.54	conserved Plasmodium protein, unknown function	NA
101	PF3D7_0105800	Pf3D7_01_v3	249231	-	2780	1.055	0.307	1.804	0.416	2.869	0.00709	0.00709	-2.374	conserved Plasmodium protein, unknown function	NA
1525	PF3D7_0622600	Pf3D7_06_v3	914743	+	687	1.219	0.355	2.084	-1.231	2.868	0.00711	0.00711	-2.372	cytochrome b-c1 complex subunit 9, putative	QCR9
111	PF3D7_0106800	Pf3D7_01_v3	286951	+	1968	0.892	0.259	1.525	1.99	2.866	0.00714	0.00714	-2.408	ras-related protein Rab-5C	RAB5c
4228	PF3D7_1304500	Pf3D7_13_v3	235800	-	636	0.946	0.274	1.617	0.471	2.864	0.00718	0.00718	-2.387	small heat shock protein, putative	NA
4807	PF3D7_1361900	Pf3D7_13_v3	2482472	-	825	1.144	0.331	1.957	0.815	2.861	0.00723	0.00723	-2.407	proliferating cell nuclear antigen 1	PCNA1
4585	PF3D7_1339700	Pf3D7_13_v3	1590510	-	5811	0.733	0.212	1.254	3.347	2.859	0.00727	0.00727	-2.505	conserved Plasmodium protein, unknown function	NA
5200	PF3D7_1427300	Pf3D7_14_v3	1064142	+	5245	0.912	0.262	1.563	2.35	2.851	0.00741	0.00741	-2.448	conserved Plasmodium protein, unknown function	NA
2430	PF3D7_0912200	Pf3D7_09_v3	549085	-	1362	0.819	0.234	1.405	4.269	2.844	0.00754	0.00754	-2.557	conserved Plasmodium membrane protein, unknown function	NA
5220	PF3D7_1429100	Pf3D7_14_v3	1142154	+	1638	0.785	0.22	1.35	5.661	2.827	0.00787	0.00787	-2.757	apicoplast ribosomal protein L15 precursor, putative	NA
363	PF3D7_0215800	Pf3D7_02_v3	650663	-	2700	1.077	0.301	1.853	0.864	2.821	0.00799	0.00799	-2.473	origin recognition complex subunit 5	ORC5
2959	PF3D7_1026200	Pf3D7_10_v3	1103464	-	1767	0.902	0.246	1.559	1.929	2.794	0.00855	0.00855	-2.571	conserved Plasmodium protein, unknown function	NA
1794	PF3D7_0716300	Pf3D7_07_v3	717281	+	1688	0.749	0.204	1.295	5.473	2.792	0.0086	0.0086	-2.8	conserved Plasmodium protein, unknown function	NA
792	PF3D7_0409600	Pf3D7_04_v3	452134	-	3438	0.65	0.176	1.123	4.771	2.79	0.00864	0.00864	-2.766	replication protein A1, large subunit	RPA1
480	PF3D7_0303800	Pf3D7_03_v3	194430	+	1782	1.294	0.351	2.238	-0.791	2.789	0.00865	0.00865	-2.527	IBR domain protein, putative	NA
2619	PF3D7_0930800	Pf3D7_09_v3	1225556	+	14020	0.861	0.232	1.49	2.921	2.783	0.00879	0.00879	-2.659	conserved Plasmodium membrane protein, unknown function	NA
2329	PF3D7_0902700	Pf3D7_09_v3	119261	-	1489	1.141	0.305	1.978	2.209	2.774	0.00899	0.00899	-2.627	Plasmodium exported protein (PHISTb), unknown function, pseudogene	NA
3283	PF3D7_1117100	Pf3D7_11_v3	652579	+	1398	1.21	0.322	2.098	-1.754	2.77	0.00908	0.00908	-2.566	deubiquinating/deneddylating enzyme	UCH54
5040	PF3D7_1411600	Pf3D7_14_v3	472850	+	1977	0.759	0.201	1.317	0.273	2.768	0.00913	0.00913	-2.573	GTP-binding protein, putative	NA
1789	PF3D7_0715800	Pf3D7_07_v3	695600	-	1305	1.362	0.36	2.364	0.125	2.765	0.0092	0.0092	-2.592	drug/metabolite transporter, putative	DMT1
1079	PF3D7_0512100	Pf3D7_05_v3	528846	-	564	0.857	0.226	1.488	1.696	2.762	0.00927	0.00927	-2.634	conserved Plasmodium protein, unknown function	NA
327	PF3D7_0212200	Pf3D7_02_v3	489904	-	915	0.578	0.151	1.005	4.416	2.754	0.00945	0.00945	-2.78	mitochondrial ribosomal protein L12 precursor, putative	NA
2651	PF3D7_0934000	Pf3D7_09_v3	1340065	-	1929	0.581	0.152	1.011	3.379	2.753	0.00948	0.00948	-2.724	histidine--tRNA ligase, putative	NA
161	PF3D7_0111800	Pf3D7_01_v3	446026	+	2824	0.664	0.173	1.154	3.878	2.751	0.00953	0.00953	-2.802	eukaryotic translation initiation factor 4E, putative	NA
479	PF3D7_0303700	Pf3D7_03_v3	191245	-	1347	1.778	0.462	3.093	-0.875	2.75	0.00964	0.00964	-2.612	lipoamide acyltransferase component of branched-chain alpha-keto acid dehydrogenase complex	BCKDH-E2
2564	PF3D7_0925500	Pf3D7_09_v3	1025493	+	861	0.979	0.253	1.704	-0.081	2.743	0.00971	0.00971	-2.624	thioredoxin-like protein 2	TLP2
3158	PF3D7_1104800	Pf3D7_11_v3	207440	+	2293	0.766	0.197	1.335	2.901	2.738	0.00984	0.00984	-2.783	metabolite/drug transporter, putative	NA
317	PF3D7_0211200	Pf3D7_02_v3	455579	-	708	1.303	0.334	2.271	-0.515	2.736	0.00988	0.00988	-2.637	ras-related protein Rab-5A	RAB5a
2842	PF3D7_1015000	Pf3D7_10_v3	611213	+	987	0.769	0.196	1.343	1.749	2.728	0.0101	0.0101	-2.689	FAD synthetase, putative	NA
5345	PF3D7_1441500	Pf3D7_14_v3	1693137	-	2056	0.559	0.142	0.977	4.176	2.725	0.0102	0.0102	-2.826	conserved Plasmodium protein, unknown function	NA
769	PF3D7_0407400	Pf3D7_04_v3	367845	-	309	0.723	0.183	1.263	2.244	2.723	0.0102	0.0102	-2.735	conserved Plasmodium protein, unknown function	NA
3533	PF3D7_1141300	Pf3D7_11_v3	1659070	-	3290	1.185	0.3	2.07	-1.166	2.723	0.0102	0.0102	-2.658	conserved Plasmodium protein, unknown function	NA
5336	PF3D7_1440600	Pf3D7_14_v3	1656434	+	3307	0.899	0.227	1.572	0.279	2.719	0.0103	0.0103	-2.677	conserved Plasmodium protein, unknown function	NA
1288	PF3D7_0532600	Pf3D7_05_v3	1318531	-	699	2.084	0.527	3.642	0.925	2.733	0.0104	0.0104	-2.699	Plasmodium exported protein, unknown function	NA
1868	PF3D7_0723800	Pf3D7_07_v3	993232	+	7002	0.962	0.241	1.683	1.735	2.713	0.0105	0.0105	-2.731	conserved Plasmodium protein, unknown function	NA
4310	PF3D7_1312500	Pf3D7_13_v3	526863	-	198	1.446	0.361	2.53	-0.142	2.71	0.0105	0.0105	-2.683	conserved Plasmodium protein, unknown function	NA
2757	PF3D7_1006600	Pf3D7_10_v3	272243	-	582	0.666	0.165	1.166	2.92	2.706	0.0106	0.0106	-2.787	phosducin-like protein, putative	PhLP1
561	PF3D7_0311800	Pf3D7_03_v3	506655	+	2192	0.887	0.221	1.554	1.096	2.706	0.0106	0.0106	-2.717	conserved protein, unknown function	NA
4647	PF3D7_1345900	Pf3D7_13_v3	1835511	-	1289	0.934	0.232	1.636	2.39	2.707	0.0106	0.0106	-2.766	kinetochore protein SPC25, putative	SPC25
5693	PF3D7_1476200	Pf3D7_14_v3	3133951	+	1701	1.092	0.273	1.911	6.368	2.72	0.0107	0.0107	-3.063	Plasmodium exported protein (PHISTb), unknown function	NA
5020	PF3D7_1409800	Pf3D7_14_v3	383188	+	1545	1.002	0.246	1.758	0.951	2.695	0.0109	0.0109	-2.757	CUGBP Elav-like family member 2, putative	CELF2
3891	PF3D7_1226400	Pf3D7_12_v3	1067470	-	3840	0.548	0.133	0.963	5.864	2.687	0.0112	0.0112	-3.04	conserved Plasmodium protein, unknown function	NA
1333	PF3D7_0604000	Pf3D7_06_v3	163828	-	6033	1.201	0.291	2.11	-2.302	2.685	0.0112	0.0112	-2.731	conserved Plasmodium protein, unknown function	NA
278	PF3D7_0207500	Pf3D7_02_v3	298897	-	3668	1.635	0.392	2.877	-2.346	2.675	0.0115	0.0115	-2.75	serine repeat antigen 6	SERA6
1286	PF3D7_0532400	Pf3D7_05_v3	1312471	+	1684	0.72	0.172	1.267	7.337	2.674	0.0116	0.0116	-3.215	lysine-rich membrane-associated PHISTb protein	LyMP
2905	PF3D7_1020800	Pf3D7_10_v3	840212	+	3192	0.57	0.134	1.006	4.651	2.66	0.0119	0.0119	-2.984	dihydrolipoamide acyltransferase component E2	DLAT
3916	PF3D7_1228900	Pf3D7_12_v3	1180670	-	4814	0.548	0.129	0.968	6.977	2.657	0.012	0.012	-3.184	conserved Plasmodium protein, unknown function	NA
412	PF3D7_0220500	Pf3D7_02_v3	823825	-	1040	0.76	0.178	1.341	5.388	2.656	0.012	0.012	-3.08	Plasmodium exported protein (hyp2), unknown function	NA
2756	PF3D7_1006500	Pf3D7_10_v3	270535	+	963	1.045	0.245	1.845	0.333	2.657	0.012	0.012	-2.8	conserved Plasmodium protein, unknown function	NA
3408	PF3D7_1129500	Pf3D7_11_v3	1141486	+	2425	0.641	0.149	1.132	3.135	2.652	0.0121	0.0121	-2.917	A/G-specific adenine glycosylase, putative	NA
4485	PF3D7_1329900	Pf3D7_13_v3	1269311	+	2124	1.008	0.236	1.781	-0.256	2.655	0.0121	0.0121	-2.795	conserved Plasmodium protein, unknown function	NA
814	PF3D7_0411800	Pf3D7_04_v3	519832	-	5787	1.298	0.303	2.292	-0.045	2.653	0.0121	0.0121	-2.801	conserved Plasmodium protein, unknown function	NA
518	PF3D7_0307600	Pf3D7_03_v3	325922	+	2462	1.204	0.28	2.128	-1.519	2.651	0.0122	0.0122	-2.793	conserved Plasmodium protein, unknown function	NA
1089	PF3D7_0513000	Pf3D7_05_v3	555264	+	810	0.768	0.177	1.359	2.769	2.642	0.0124	0.0124	-2.959	conserved Plasmodium protein, unknown function	NA
3444	PF3D7_1132900	Pf3D7_11_v3	1273407	+	603	0.673	0.155	1.192	1.338	2.639	0.0125	0.0125	-2.882	glycine cleavage system H protein	GCVH
3844	PF3D7_1221700	Pf3D7_12_v3	865726	+	2856	0.727	0.167	1.286	1.563	2.641	0.0125	0.0125	-2.886	FbpA domain protein, putative	NA
4297	PF3D7_1311300	Pf3D7_13_v3	484205	+	1259	0.769	0.176	1.361	1.114	2.639	0.0125	0.0125	-2.857	ATP synthase subunit gamma, mitochondrial	NA
2096	PF3D7_0813100	Pf3D7_08_v3	647316	-	1989	0.785	0.18	1.39	1.661	2.639	0.0125	0.0125	-2.864	conserved Plasmodium protein, unknown function	NA
94	PF3D7_0105200	Pf3D7_01_v3	222254	-	1707	0.955	0.219	1.691	1.461	2.639	0.0125	0.0125	-2.89	RAP protein, putative	NA
4213	PF3D7_1303200	Pf3D7_13_v3	160488	-	1173	0.88	0.201	1.558	0.475	2.636	0.0126	0.0126	-2.838	SNARE protein, putative	VAMP8
4214	PF3D7_1303200	Pf3D7_13_v3	160488	-	1173	0.88	0.201	1.558	0.475	2.636	0.0126	0.0126	-2.838	SNARE protein, putative	VAMP8
1046	PF3D7_0508800	Pf3D7_05_v3	363588	-	855	0.942	0.216	1.669	1.251	2.638	0.0126	0.0126	-2.884	single-stranded DNA-binding protein	SSB
4025	PF3D7_1239700	Pf3D7_12_v3	1655487	+	2643	0.674	0.153	1.194	3.16	2.632	0.0128	0.0128	-3.006	ATP-dependent zinc metalloprotease FTSH 1	FTSH1
3592	PF3D7_1147300	Pf3D7_11_v3	1883775	+	4086	1.628	0.371	2.885	1.255	2.64	0.0128	0.0128	-2.901	conserved Plasmodium protein, unknown function	NA
1392	PF3D7_0609800	Pf3D7_06_v3	421157	-	1466	0.621	0.139	1.103	4.093	2.621	0.0131	0.0131	-3.022	palmitoyltransferase DHHC2, putative	DHHC2
350	PF3D7_0214500	Pf3D7_02_v3	590501	+	921	0.92	0.206	1.634	0.41	2.62	0.0131	0.0131	-2.872	conserved Plasmodium protein, unknown function	NA
1002	PF3D7_0504400	Pf3D7_05_v3	172150	+	2268	1.39	0.311	2.469	-1.67	2.62	0.0131	0.0131	-2.853	ATP-dependent helicase, putative	NA
115	PF3D7_0107200	Pf3D7_01_v3	297362	+	2036	1.524	0.335	2.713	-1.999	2.606	0.0136	0.0136	-2.876	carbon catabolite repressor protein 4, putative	NA
4132	PF3D7_1250300	Pf3D7_12_v3	2064987	+	1054	0.699	0.153	1.245	3.441	2.602	0.0137	0.0137	-3.062	vacuolar protein sorting-associated protein 26, putative	VPS26
4574	PF3D7_1338600	Pf3D7_13_v3	1556659	-	3076	0.975	0.213	1.737	-0.747	2.602	0.0137	0.0137	-2.893	conserved Plasmodium protein, unknown function	NA
5087	PF3D7_1416200	Pf3D7_14_v3	650503	-	6843	0.882	0.192	1.573	4.065	2.598	0.0138	0.0138	-3.066	metacaspase-like protein	MCA3
654	PF3D7_0320800	Pf3D7_03_v3	870817	+	1526	0.971	0.211	1.731	0.936	2.598	0.0138	0.0138	-2.937	ATP-dependent RNA helicase DDX6	DOZI
5025	PF3D7_1410300	Pf3D7_14_v3	403652	-	13411	0.502	0.108	0.895	7.236	2.589	0.0142	0.0142	-3.35	WD repeat-containing protein, putative	NA
5229	PF3D7_1430000	Pf3D7_14_v3	1181664	-	1319	0.526	0.112	0.939	4.547	2.584	0.0143	0.0143	-3.179	conserved Plasmodium protein, unknown function	NA
3465	PF3D7_1135000	Pf3D7_11_v3	1372311	+	1549	0.699	0.149	1.249	0.656	2.584	0.0143	0.0143	-2.944	PQ-loop repeat-containing protein, unspecified product	NA
3466	PF3D7_1135000	Pf3D7_11_v3	1372311	+	1549	0.699	0.149	1.249	0.656	2.584	0.0143	0.0143	-2.944	PQ-loop repeat-containing protein, unspecified product	NA
3467	PF3D7_1135000	Pf3D7_11_v3	1372311	+	1549	0.699	0.149	1.249	0.656	2.584	0.0143	0.0143	-2.944	PQ-loop repeat-containing protein, unspecified product	NA
4026	PF3D7_1239800	Pf3D7_12_v3	1660451	+	17304	0.741	0.158	1.325	3.189	2.585	0.0143	0.0143	-3.09	conserved Plasmodium protein, unknown function	NA
2950	PF3D7_1025300	Pf3D7_10_v3	1057890	-	2769	0.841	0.177	1.505	0.538	2.576	0.0146	0.0146	-2.972	conserved Plasmodium protein, unknown function	NA
3843	PF3D7_1221600	Pf3D7_12_v3	863810	+	1377	1.542	0.323	2.76	-2.999	2.573	0.0147	0.0147	-2.938	protein TSSC1, putative	NA
1820	PF3D7_0719000	Pf3D7_07_v3	838135	+	462	0.548	0.114	0.981	4.154	2.567	0.0149	0.0149	-3.18	conserved Plasmodium protein, unknown function	NA
2813	PF3D7_1012100	Pf3D7_10_v3	468071	-	1466	1.138	0.236	2.041	-0.192	2.565	0.015	0.015	-2.972	conserved Plasmodium protein, unknown function	NA
1661	PF3D7_0703200	Pf3D7_07_v3	122513	-	4623	0.802	0.166	1.438	4.579	2.562	0.0151	0.0151	-3.222	conserved Plasmodium protein, unknown function	NA
4319	PF3D7_1313400	Pf3D7_13_v3	569840	-	2493	0.861	0.176	1.546	1.865	2.554	0.0154	0.0154	-3.081	DEAD box helicase, putative	NA
3234	PF3D7_1112400	Pf3D7_11_v3	475880	+	576	1.115	0.227	2.003	-0.046	2.552	0.0154	0.0154	-2.995	conserved Plasmodium protein, unknown function	NA
4211	PF3D7_1303000	Pf3D7_13_v3	158144	+	635	0.727	0.147	1.307	3.57	2.549	0.0156	0.0156	-3.21	conserved Plasmodium protein, unknown function	NA
4796	PF3D7_1360900	Pf3D7_13_v3	2440438	-	2472	0.872	0.175	1.57	2.873	2.544	0.0158	0.0158	-3.142	polyadenylate-binding protein, putative	NA
863	PF3D7_0416600	Pf3D7_04_v3	726265	+	864	1.239	0.245	2.234	-0.427	2.535	0.0161	0.0161	-3.022	prohibitin-like protein, putative	NA
3869	PF3D7_1224200	Pf3D7_12_v3	981301	+	3175	0.849	0.167	1.531	1.193	2.53	0.0163	0.0163	-3.072	BRO1 domain-containing protein, putative	NA
4443	PF3D7_1325700	Pf3D7_13_v3	1068050	-	586	1.404	0.275	2.534	-2.212	2.528	0.0164	0.0164	-3.019	conserved Plasmodium protein, unknown function	NA
3333	PF3D7_1122000	Pf3D7_11_v3	838380	-	1721	0.928	0.18	1.676	0.924	2.522	0.0166	0.0166	-3.089	conserved Plasmodium protein, unknown function	NA
3712	PF3D7_1208700	Pf3D7_12_v3	403350	+	1465	0.598	0.114	1.082	3.208	2.512	0.017	0.017	-3.206	conserved protein, unknown function	NA
112	PF3D7_0106900	Pf3D7_01_v3	290386	+	2205	0.991	0.187	1.795	0.359	2.507	0.0172	0.0172	-3.093	2-C-methyl-D-erythritol 4-phosphate cytidylyltransferase, putative	IspD
2265	PF3D7_0830100	Pf3D7_08_v3	1280935	+	2827	1.002	0.189	1.815	1.675	2.507	0.0172	0.0172	-3.142	unspecified product	NA
5542	PF3D7_1461000	Pf3D7_14_v3	2482775	+	2312	1.547	0.292	2.801	-1.808	2.506	0.0172	0.0172	-3.06	conserved Plasmodium protein, unknown function	NA
2359	PF3D7_0905600	Pf3D7_09_v3	280207	+	3896	1.009	0.19	1.828	-0.229	2.506	0.0173	0.0173	-3.074	WD repeat-containing protein 66, putative	WDR66
1963	PF3D7_0800200	Pf3D7_08_v3	29700	-	9334	1.529	0.282	2.775	3.106	2.503	0.0179	0.0179	-3.213	erythrocyte membrane protein 1, PfEMP1	VAR
1462	PF3D7_0616600	Pf3D7_06_v3	689254	-	1878	0.918	0.167	1.668	-0.572	2.487	0.018	0.018	-3.109	conserved protein, unknown function	NA
3700	PF3D7_1207500	Pf3D7_12_v3	348274	+	827	0.707	0.128	1.285	1.6	2.485	0.0181	0.0181	-3.167	RNA-binding protein, putative	NA
4306	PF3D7_1312200	Pf3D7_13_v3	518107	+	1261	1.433	0.261	2.605	-2.956	2.486	0.0181	0.0181	-3.092	conserved Plasmodium protein, unknown function	NA
1796	PF3D7_0716500	Pf3D7_07_v3	721717	+	2999	0.855	0.154	1.556	2.298	2.48	0.0184	0.0184	-3.208	conserved Plasmodium protein, unknown function	NA
1996	PF3D7_0803300	Pf3D7_08_v3	208451	+	1841	1.213	0.218	2.207	-1.988	2.479	0.0184	0.0184	-3.107	mitogen-activated protein kinase organizer 1, putative	MORG1
3631	PF3D7_1200600	Pf3D7_12_v3	46788	-	10018	1.128	0.203	2.054	5.202	2.487	0.0185	0.0185	-3.398	erythrocyte membrane protein 1, PfEMP1	VAR2CSA
5201	PF3D7_1427400	Pf3D7_14_v3	1077357	-	2365	0.492	0.087	0.896	4.299	2.473	0.0186	0.0186	-3.366	conserved Plasmodium membrane protein, unknown function	NA
5202	PF3D7_1427400	Pf3D7_14_v3	1077357	-	2365	0.492	0.087	0.896	4.299	2.473	0.0186	0.0186	-3.366	conserved Plasmodium membrane protein, unknown function	NA
977	PF3D7_0501800	Pf3D7_05_v3	91361	+	3231	0.967	0.172	1.761	1.092	2.473	0.0186	0.0186	-3.207	chromosome assembly factor 1	CAF1
2612	PF3D7_0930200	Pf3D7_09_v3	1195693	-	2770	1.704	0.303	3.105	-1.935	2.474	0.0187	0.0187	-3.118	leucine-rich repeat protein	LRR8
78	PF3D7_0103600	Pf3D7_01_v3	161131	+	5099	0.722	0.128	1.316	4.325	2.47	0.0188	0.0188	-3.384	ATP-dependent RNA helicase, putative	NA
4583	PF3D7_1339500	Pf3D7_13_v3	1587028	-	847	0.895	0.158	1.631	0.312	2.469	0.0188	0.0188	-3.165	mitochondrial ribosomal protein L49 precursor, putative	NA
2940	PF3D7_1024300	Pf3D7_10_v3	1022505	+	393	1.325	0.233	2.417	-2.197	2.467	0.0189	0.0189	-3.128	conserved Plasmodium protein, unknown function	NA
3156	PF3D7_1104700	Pf3D7_11_v3	204593	-	1202	0.812	0.142	1.481	3.149	2.465	0.019	0.019	-3.351	DNA-directed RNA polymerase III subunit RPC8, putative	RPC25
3157	PF3D7_1104700	Pf3D7_11_v3	204593	-	1202	0.812	0.142	1.481	3.149	2.465	0.019	0.019	-3.351	DNA-directed RNA polymerase III subunit RPC8, putative	RPC25
3928	PF3D7_1230000	Pf3D7_12_v3	1233696	+	7592	0.599	0.104	1.093	6.474	2.462	0.0191	0.0191	-3.569	conserved Plasmodium protein, unknown function	NA
3585	PF3D7_1146600	Pf3D7_11_v3	1834401	+	4373	0.866	0.151	1.581	3.625	2.464	0.0191	0.0191	-3.331	CCAAT-box DNA binding protein subunit B	NFYB
4610	PF3D7_1342200	Pf3D7_13_v3	1660812	-	2919	1.128	0.195	2.062	0.707	2.458	0.0193	0.0193	-3.203	conserved Plasmodium membrane protein, unknown function	NA
993	PF3D7_0503400	Pf3D7_05_v3	140710	+	762	1.071	0.184	1.959	1.456	2.454	0.0195	0.0195	-3.227	actin-depolymerizing factor 1	ADF1
392	PF3D7_0218600	Pf3D7_02_v3	755418	+	7143	0.437	0.075	0.799	7.327	2.452	0.0196	0.0196	-3.666	conserved Plasmodium protein, unknown function	NA
3300	PF3D7_1118700	Pf3D7_11_v3	708526	-	4338	0.762	0.129	1.395	0.525	2.45	0.0197	0.0197	-3.196	myosin light chain B	MLC-B
469	PF3D7_0302700	Pf3D7_03_v3	146372	-	685	0.981	0.166	1.795	-0.031	2.449	0.0197	0.0197	-3.181	CDGSH iron-sulfur domain-containing protein, putative	NA
5524	PF3D7_1459300	Pf3D7_14_v3	2432177	+	570	0.571	0.097	1.045	2.446	2.449	0.0198	0.0198	-3.266	OPA3-like protein, putative	NA
3493	PF3D7_1137400	Pf3D7_11_v3	1470600	-	1278	0.654	0.111	1.197	3.721	2.447	0.0198	0.0198	-3.384	UVB-resistance protein UVR8 homologue	NA
1800	PF3D7_0716900	Pf3D7_07_v3	736370	+	969	0.356	0.058	0.654	5.607	2.427	0.0208	0.0208	-3.576	drug/metabolite transporter, putative	DMT2
5684	PF3D7_1475300	Pf3D7_14_v3	3085496	+	687	0.749	0.12	1.379	0.626	2.42	0.0211	0.0211	-3.274	cytochrome c oxidase assembly protein COX11, putative	COX11
1173	PF3D7_0521400	Pf3D7_05_v3	875873	-	1689	0.81	0.128	1.492	3.285	2.414	0.0214	0.0214	-3.427	conserved Plasmodium protein, unknown function	NA
2930	PF3D7_1023300	Pf3D7_10_v3	984228	-	1103	1.032	0.162	1.903	-0.075	2.412	0.0215	0.0215	-3.255	conserved Plasmodium protein, unknown function	NA
4586	PF3D7_1339800	Pf3D7_13_v3	1597400	-	219	1.097	0.171	2.023	0.3	2.409	0.0217	0.0217	-3.279	mitotic-spindle organizing protein 1, putative	NA
1054	PF3D7_0509600	Pf3D7_05_v3	403342	+	2301	0.435	0.067	0.803	5.667	2.404	0.0219	0.0219	-3.622	asparagine--tRNA ligase	AsnRS
3392	PF3D7_1127900	Pf3D7_11_v3	1083321	-	1742	0.595	0.092	1.099	3.704	2.404	0.0219	0.0219	-3.46	conserved Plasmodium protein, unknown function	NA
4318	PF3D7_1313300	Pf3D7_13_v3	568664	+	872	0.939	0.144	1.734	-0.723	2.402	0.022	0.022	-3.261	peptidyl-prolyl cis-trans isomerase, putative	NA
3112	PF3D7_1100200	Pf3D7_11_v3	32666	-	9721	1.89	0.288	3.492	3.638	2.414	0.0224	0.0224	-3.435	erythrocyte membrane protein 1, PfEMP1	VAR
4080	PF3D7_1245200	Pf3D7_12_v3	1888250	-	4449	1.307	0.194	2.421	-0.08	2.388	0.0227	0.0227	-3.305	conserved Plasmodium membrane protein, unknown function	NA
4081	PF3D7_1245300	Pf3D7_12_v3	1893069	+	835	1.189	0.175	2.203	1.085	2.383	0.023	0.023	-3.357	NEDD8-conjugating enzyme UBC12, putative	UBC12
2643	PF3D7_0933200	Pf3D7_09_v3	1317827	-	1642	0.788	0.114	1.462	2.091	2.377	0.0233	0.0233	-3.399	calcyclin binding protein, putative	NA
5180	PF3D7_1425300	Pf3D7_14_v3	985365	-	2391	1.49	0.216	2.764	-1.051	2.378	0.0233	0.0233	-3.296	conserved Plasmodium protein, unknown function	NA
5019	PF3D7_1409700	Pf3D7_14_v3	377285	-	2898	0.746	0.108	1.385	0.985	2.376	0.0234	0.0234	-3.365	conserved Plasmodium protein, unknown function	NA
4533	PF3D7_1334500	Pf3D7_13_v3	1405731	-	1782	1.015	0.145	1.884	1.438	2.373	0.0235	0.0235	-3.381	MSP7-like protein	MSRP6
574	PF3D7_0313100	Pf3D7_03_v3	539743	+	3068	0.442	0.062	0.821	5.753	2.368	0.0238	0.0238	-3.733	ubiquitin-protein ligase, putative	HRD3
2786	PF3D7_1009500	Pf3D7_10_v3	383044	-	1750	0.794	0.112	1.475	1.631	2.368	0.0238	0.0238	-3.413	metalloprotease, putative	NA
5107	PF3D7_1418200	Pf3D7_14_v3	775460	+	852	0.933	0.132	1.733	1.45	2.368	0.0238	0.0238	-3.412	conserved Plasmodium protein, unknown function	NA
1807	PF3D7_0717600	Pf3D7_07_v3	758720	-	4158	1.474	0.209	2.74	2.158	2.377	0.0239	0.0239	-3.447	conserved Plasmodium protein, unknown function	NA
627	PF3D7_0318100	Pf3D7_03_v3	743929	+	1125	0.523	0.073	0.974	3.813	2.363	0.0241	0.0241	-3.553	stomatin-like protein	NA
1205	PF3D7_0524600	Pf3D7_05_v3	1017809	+	774	0.734	0.102	1.366	1.572	2.362	0.0241	0.0241	-3.404	50S ribosomal protein L12, apicoplast, putative	NA
1817	PF3D7_0718700	Pf3D7_07_v3	831549	-	1374	1.031	0.139	1.923	0.581	2.352	0.0247	0.0247	-3.398	conserved Plasmodium membrane protein, unknown function	NA
1494	PF3D7_0619600	Pf3D7_06_v3	825157	+	2616	1.311	0.178	2.443	1.396	2.356	0.0247	0.0247	-3.441	conserved Plasmodium protein, unknown function	NA
5230	PF3D7_1430100	Pf3D7_14_v3	1184910	+	2133	1.123	0.151	2.095	0.172	2.35	0.0248	0.0248	-3.394	serine/threonine protein phosphatase 2A activator	PTPA
2258	PF3D7_0829400	Pf3D7_08_v3	1257716	-	1326	0.851	0.114	1.588	1.591	2.348	0.0249	0.0249	-3.427	prolyl 4-hydroxylase subunit alpha, putative	NA
3925	PF3D7_1229800	Pf3D7_12_v3	1219136	-	7330	1.041	0.137	1.945	-0.903	2.342	0.0253	0.0253	-3.365	myosin D	MyoD
1731	PF3D7_0710000	Pf3D7_07_v3	447515	-	10982	0.818	0.107	1.529	3.518	2.339	0.0255	0.0255	-3.551	conserved Plasmodium protein, unknown function	NA
1220	PF3D7_0526100	Pf3D7_05_v3	1079779	+	1230	1.036	0.135	1.938	-0.22	2.337	0.0256	0.0256	-3.393	conserved Plasmodium membrane protein, unknown function	NA
4012	PF3D7_1238400	Pf3D7_12_v3	1592402	-	1231	0.889	0.114	1.663	-0.264	2.334	0.0258	0.0258	-3.39	conserved Plasmodium protein, unknown function	NA
4563	PF3D7_1337500	Pf3D7_13_v3	1509589	-	10005	0.854	0.109	1.6	7.883	2.341	0.026	0.026	-3.915	conserved Plasmodium protein, unknown function	NA
478	PF3D7_0303600	Pf3D7_03_v3	190180	+	540	1	0.127	1.873	0.58	2.33	0.026	0.026	-3.442	plasmoredoxin	Plrx
2394	PF3D7_0908700	Pf3D7_09_v3	401495	-	1900	0.426	0.054	0.799	3.353	2.327	0.0262	0.0262	-3.592	tRNA pseudouridine synthase, putative	NA
3221	PF3D7_1111100	Pf3D7_11_v3	437171	-	1050	0.705	0.088	1.323	1.117	2.322	0.0264	0.0264	-3.452	replication factor C subunit 5, putative	RFC5
2849	PF3D7_1015500	Pf3D7_10_v3	624048	-	1848	0.656	0.081	1.231	0.999	2.319	0.0266	0.0266	-3.459	conserved Plasmodium protein, unknown function	NA
1149	PF3D7_0519000	Pf3D7_05_v3	788599	+	882	1.211	0.148	2.274	-1.071	2.316	0.0268	0.0268	-3.414	histone RNA hairpin-binding protein, putative	SLBP
4552	PF3D7_1336400	Pf3D7_13_v3	1477961	-	2064	0.559	0.067	1.051	4.682	2.311	0.0271	0.0271	-3.695	RanBPM and CLTH-like protein, putative	NA
1992	PF3D7_0802900	Pf3D7_08_v3	195148	-	531	0.965	0.116	1.814	0.35	2.312	0.0271	0.0271	-3.445	conserved Plasmodium protein, unknown function	NA
3255	PF3D7_1114400	Pf3D7_11_v3	547383	-	1914	1.269	0.151	2.387	-0.368	2.308	0.0273	0.0273	-3.441	conserved Plasmodium protein, unknown function	NA
595	PF3D7_0315000	Pf3D7_03_v3	611334	+	681	0.703	0.083	1.323	1.983	2.307	0.0274	0.0274	-3.517	zinc finger protein, putative	NA
1012	PF3D7_0505400	Pf3D7_05_v3	236143	-	2223	1.085	0.128	2.041	-0.553	2.306	0.0274	0.0274	-3.435	conserved Plasmodium protein, unknown function	NA
3711	PF3D7_1208600	Pf3D7_12_v3	402300	+	228	0.674	0.078	1.27	3.599	2.301	0.0278	0.0278	-3.685	mitochondrial import inner membrane translocase subunit TIM10, putative	TIM10
840	PF3D7_0414300	Pf3D7_04_v3	649893	-	839	0.423	0.048	0.798	4.175	2.292	0.0283	0.0283	-3.731	Rab5-interacting protein, putative	NA
1458	PF3D7_0616200	Pf3D7_06_v3	674118	+	2258	0.817	0.092	1.542	1.306	2.291	0.0284	0.0284	-3.529	kinetochore protein NDC80, putative	NDC80
2865	PF3D7_1017000	Pf3D7_10_v3	685578	+	3285	0.961	0.107	1.815	2.126	2.289	0.0285	0.0285	-3.579	DNA polymerase delta catalytic subunit	NA
1258	PF3D7_0529700	Pf3D7_05_v3	1209006	-	3097	1.07	0.118	2.023	1.595	2.284	0.0288	0.0288	-3.531	conserved Plasmodium protein, unknown function	NA
2640	PF3D7_0932900	Pf3D7_09_v3	1309467	-	477	0.691	0.076	1.307	3.795	2.283	0.0289	0.0289	-3.674	conserved Plasmodium protein, unknown function	NA
1972	PF3D7_0800900	Pf3D7_08_v3	83128	+	777	0.833	0.091	1.575	5.146	2.285	0.0289	0.0289	-3.777	Plasmodium exported protein (hyp7), unknown function, pseudogene	NA
1595	PF3D7_0629400	Pf3D7_06_v3	1210420	+	2343	0.636	0.067	1.204	3.776	2.272	0.0296	0.0296	-3.78	RNA-binding protein, putative	NA
3302	PF3D7_1118900	Pf3D7_11_v3	716795	+	1618	0.648	0.068	1.229	0.795	2.271	0.0297	0.0297	-3.542	conserved Plasmodium protein, unknown function	NA
2768	PF3D7_1007700	Pf3D7_10_v3	301126	-	4794	0.526	0.054	0.999	5	2.265	0.0301	0.0301	-3.888	transcription factor with AP2 domain(s)	ApiAP2
3045	PF3D7_1034600	Pf3D7_10_v3	1376827	-	933	1.024	0.103	1.945	-2.695	2.262	0.0303	0.0303	-3.476	translation initiation factor IF-3, putative	IF3b
2708	PF3D7_1001800	Pf3D7_10_v3	96113	-	919	0.477	0.048	0.906	6.932	2.26	0.0305	0.0305	-3.969	Plasmodium exported protein (PHISTc), unknown function	NA
1161	PF3D7_0520200	Pf3D7_05_v3	835314	-	2094	0.562	0.056	1.068	4.517	2.26	0.0305	0.0305	-3.794	conserved Plasmodium protein, unknown function	NA
5253	PF3D7_1432400	Pf3D7_14_v3	1275899	-	6747	1.041	0.102	1.98	-1.045	2.255	0.0308	0.0308	-3.512	leucine-rich repeat protein	LRR5
3878	PF3D7_1225100	Pf3D7_12_v3	1018506	+	5503	0.725	0.071	1.379	2.961	2.254	0.0309	0.0309	-3.697	isoleucine--tRNA ligase, putative	NA
950	PF3D7_0425250	Pf3D7_04_v3	1138009	-	551	1.82	0.178	3.462	-2.445	2.257	0.0309	0.0309	-3.49	Plasmodium exported protein (PHIST), unknown function, pseudogene	NA
1482	PF3D7_0618600	Pf3D7_06_v3	775980	-	1856	0.724	0.07	1.377	0.494	2.252	0.031	0.031	-3.577	rhomboid protease ROM10	ROM10
1917	PF3D7_0728700	Pf3D7_07_v3	1226029	-	2686	1.086	0.105	2.068	-0.84	2.25	0.0311	0.0311	-3.526	alpha/beta hydrolase, putative	NA
1910	PF3D7_0728100	Pf3D7_07_v3	1193616	-	16686	1.048	0.099	1.997	-1.781	2.247	0.0314	0.0314	-3.511	conserved Plasmodium membrane protein, unknown function	NA
3856	PF3D7_1222900	Pf3D7_12_v3	923527	+	1672	1.421	0.135	2.707	-2.071	2.246	0.0314	0.0314	-3.513	conserved Plasmodium protein, unknown function	NA
340	PF3D7_0213500	Pf3D7_02_v3	543802	-	2094	0.515	0.049	0.981	3.667	2.245	0.0315	0.0315	-3.755	tetratricopeptide repeat protein, putative	NA
2939	PF3D7_1024200	Pf3D7_10_v3	1021292	-	483	1.423	0.134	2.711	-1.816	2.245	0.0315	0.0315	-3.513	RNA-binding protein, putative	NA
4337	PF3D7_1315200	Pf3D7_13_v3	639681	-	3210	0.919	0.085	1.752	2.591	2.242	0.0317	0.0317	-3.689	conserved Plasmodium protein, unknown function	NA
5069	PF3D7_1414400	Pf3D7_14_v3	575496	+	1560	0.472	0.044	0.901	3.684	2.241	0.0318	0.0318	-3.781	serine/threonine protein phosphatase PP1	PP1
2066	PF3D7_0810300	Pf3D7_08_v3	525058	-	2547	0.828	0.077	1.58	1.312	2.241	0.0318	0.0318	-3.63	protein phosphatase PPM5, putative	PPM5
4722	PF3D7_1353300	Pf3D7_13_v3	2132068	-	6516	0.425	0.039	0.812	4.25	2.236	0.0321	0.0321	-3.86	conserved Plasmodium protein, unknown function	NA
4636	PF3D7_1344800	Pf3D7_13_v3	1796274	+	1436	0.458	0.041	0.875	6.772	2.236	0.0322	0.0322	-4.067	aspartate carbamoyltransferase	ATCase
2702	PF3D7_1001200	Pf3D7_10_v3	70547	-	273	0.642	0.058	1.227	2.374	2.234	0.0323	0.0323	-3.714	acyl-CoA binding protein, isoform 2, ACBP2	ACBP2
2988	PF3D7_1029100	Pf3D7_10_v3	1190426	+	4591	0.848	0.075	1.622	0.247	2.231	0.0325	0.0325	-3.581	conserved Plasmodium protein, unknown function	NA
2989	PF3D7_1029100	Pf3D7_10_v3	1190426	+	4591	0.848	0.075	1.622	0.247	2.231	0.0325	0.0325	-3.581	conserved Plasmodium protein, unknown function	NA
1959	PF3D7_0732800	Pf3D7_07_v3	1410435	+	1797	1.684	0.149	3.22	1.726	2.24	0.0326	0.0326	-3.644	erythrocyte membrane protein 1 (PfEMP1), exon 2	NA
1790	PF3D7_0715900	Pf3D7_07_v3	699239	+	1671	1.017	0.088	1.946	0.616	2.227	0.0328	0.0328	-3.608	cation diffusion facilitator family protein, putative	CDF
2182	PF3D7_0821800	Pf3D7_08_v3	976074	+	571	0.432	0.037	0.827	7.09	2.224	0.033	0.033	-4.103	protein transport protein SEC61 subunit beta, putative	SEC61B
3641	PF3D7_1201600	Pf3D7_12_v3	101581	-	1044	0.585	0.05	1.119	1.139	2.224	0.033	0.033	-3.629	NIMA related kinase 3	NEK3
2799	PF3D7_1010800	Pf3D7_10_v3	424866	-	900	0.705	0.059	1.352	0.841	2.219	0.0334	0.0334	-3.631	50S ribosomal protein L22, mitochondrial, putative	NA
951	PF3D7_0425300	Pf3D7_04_v3	1141222	+	875	1.44	0.12	2.761	-1.588	2.218	0.0334	0.0334	-3.559	Plasmodium exported protein (PHISTa), unknown function, pseudogene	NA
5032	PF3D7_1411000	Pf3D7_14_v3	440541	+	7233	0.626	0.052	1.2	3.01	2.218	0.0335	0.0335	-3.739	conserved Plasmodium protein, unknown function	NA
5033	PF3D7_1411000	Pf3D7_14_v3	440541	+	7233	0.626	0.052	1.2	3.01	2.218	0.0335	0.0335	-3.739	conserved Plasmodium protein, unknown function	NA
4514	PF3D7_1332600	Pf3D7_13_v3	1342012	-	1794	0.528	0.044	1.013	3.771	2.216	0.0336	0.0336	-3.807	apurinic/apyrimidinic endonuclease Apn1, putative	APN1
2938	PF3D7_1024100	Pf3D7_10_v3	1017201	-	3315	0.752	0.061	1.443	1.315	2.213	0.0339	0.0339	-3.67	conserved Plasmodium protein, unknown function	NA
370	PF3D7_0216500	Pf3D7_02_v3	678487	+	5217	0.735	0.058	1.412	2.101	2.207	0.0342	0.0342	-3.722	conserved Plasmodium protein, unknown function	NA
813	PF3D7_0411700	Pf3D7_04_v3	518685	-	417	0.832	0.065	1.598	0.439	2.207	0.0343	0.0343	-3.626	conserved Plasmodium protein, unknown function	NA
3174	PF3D7_1106400	Pf3D7_11_v3	267547	+	351	1.197	0.089	2.304	-2.157	2.197	0.035	0.035	-3.592	conserved Plasmodium protein, unknown function	NA
5235	PF3D7_1430600	Pf3D7_14_v3	1207398	+	2631	0.825	0.06	1.59	-0.289	2.194	0.0353	0.0353	-3.628	exodeoxyribonuclease III, putative	NA
1455	PF3D7_0615900	Pf3D7_06_v3	662435	-	5421	0.702	0.051	1.353	2.969	2.193	0.0354	0.0354	-3.88	conserved Plasmodium protein, unknown function	NA
1683	PF3D7_0705400	Pf3D7_07_v3	264973	-	2466	0.609	0.043	1.175	1.969	2.187	0.0359	0.0359	-3.744	DNA replication licensing factor MCM7	MCM7
4621	PF3D7_1343300	Pf3D7_13_v3	1707731	-	2949	0.454	0.031	0.877	6.07	2.183	0.0361	0.0361	-4.111	conserved Plasmodium protein, unknown function	NA
4550	PF3D7_1336200	Pf3D7_13_v3	1474274	+	1388	0.799	0.053	1.545	3.191	2.177	0.0367	0.0367	-3.887	conserved Plasmodium protein, unknown function	NA
4489	PF3D7_1330200	Pf3D7_13_v3	1275104	+	796	0.549	0.035	1.062	2.88	2.172	0.0371	0.0371	-3.831	conserved Plasmodium protein, unknown function	NA
4262	PF3D7_1307900	Pf3D7_13_v3	351840	-	2979	1.204	0.076	2.331	-3.286	2.171	0.0371	0.0371	-3.619	tripartite motif protein, putative	NA
1585	PF3D7_0628400	Pf3D7_06_v3	1176265	+	2323	0.676	0.042	1.31	2.911	2.169	0.0373	0.0373	-3.814	conserved Plasmodium membrane protein, unknown function	NA
3586	PF3D7_1146700	Pf3D7_11_v3	1839423	-	3456	1.055	0.066	2.043	-2.517	2.169	0.0373	0.0373	-3.63	kinesin-like protein, putative	NA
945	PF3D7_0424800	Pf3D7_04_v3	1123986	+	1019	0.664	0.041	1.288	6.748	2.169	0.0374	0.0374	-4.13	Plasmodium exported protein (PHISTb), unknown function	NA
4444	PF3D7_1325800	Pf3D7_13_v3	1071146	+	4602	0.773	0.048	1.499	1.903	2.168	0.0374	0.0374	-3.811	conserved Plasmodium protein, unknown function	NA
1419	PF3D7_0612500	Pf3D7_06_v3	522300	-	366	0.527	0.032	1.022	2.183	2.165	0.0377	0.0377	-3.805	conserved Plasmodium protein, unknown function	NA
5335	PF3D7_1440500	Pf3D7_14_v3	1654047	+	1662	0.725	0.044	1.407	3.414	2.163	0.0377	0.0377	-3.947	allantoicase, putative	NA
1816	PF3D7_0718600	Pf3D7_07_v3	826837	+	4469	0.765	0.043	1.487	1.492	2.154	0.0385	0.0385	-3.793	conserved Plasmodium protein, unknown function	NA
1116	PF3D7_0515700	Pf3D7_05_v3	653966	-	1371	1.1	0.062	2.139	0.466	2.154	0.0385	0.0385	-3.747	glideosome-associated protein 40, putative	GAP40
1491	PF3D7_0619300	Pf3D7_06_v3	803374	-	11179	0.538	0.03	1.046	3.253	2.153	0.0386	0.0386	-3.896	conserved Plasmodium protein, unknown function	NA
2135	PF3D7_0817100	Pf3D7_08_v3	774299	+	2493	0.844	0.047	1.641	0.177	2.153	0.0386	0.0386	-3.731	tRNA modification GTPase, putative	NA
2138	PF3D7_0817400	Pf3D7_08_v3	794287	-	3520	0.735	0.04	1.431	1.105	2.15	0.0388	0.0388	-3.783	phosphatase, putative	NA
997	PF3D7_0503900	Pf3D7_05_v3	153889	-	2169	0.9	0.049	1.751	0.1	2.151	0.0388	0.0388	-3.734	conserved Plasmodium protein, unknown function	NA
3926	PF3D7_1229900	Pf3D7_12_v3	1228063	-	4943	0.689	0.037	1.341	2.623	2.15	0.0389	0.0389	-3.845	conserved Plasmodium protein, unknown function	NA
3927	PF3D7_1229900	Pf3D7_12_v3	1228063	-	4943	0.689	0.037	1.341	2.623	2.15	0.0389	0.0389	-3.845	conserved Plasmodium protein, unknown function	NA
5127	PF3D7_1420100	Pf3D7_14_v3	832335	-	4350	0.684	0.036	1.332	0.317	2.146	0.0393	0.0393	-3.733	conserved Plasmodium protein, unknown function	NA
4892	PF3D7_1370500	Pf3D7_13_v3	2794237	+	615	1.539	0.079	2.999	5.282	2.161	0.0396	0.0396	-4.137	unspecified product	NA
2118	PF3D7_0815400	Pf3D7_08_v3	725781	-	722	0.788	0.04	1.537	-0.124	2.141	0.0397	0.0397	-3.74	conserved Apicomplexan protein, unknown function	NA
3727	PF3D7_1210100	Pf3D7_12_v3	455304	-	933	0.749	0.037	1.461	0.644	2.138	0.0399	0.0399	-3.801	syntaxin, Qa-SNARE family	SYN2
3233	PF3D7_1112300	Pf3D7_11_v3	471946	-	2729	1.353	0.066	2.641	-1.441	2.137	0.04	0.04	-3.698	conserved Plasmodium protein, unknown function	NA
1389	PF3D7_0609500	Pf3D7_06_v3	402722	+	4521	0.785	0.036	1.534	0.415	2.131	0.0405	0.0405	-3.768	conserved Plasmodium protein, unknown function	NA
3996	PF3D7_1236800	Pf3D7_12_v3	1532248	+	1830	0.905	0.041	1.768	-1.101	2.129	0.0407	0.0407	-3.732	protein-S-isoprenylcysteine O-methyltransferase, putative	NA
156	PF3D7_0111300	Pf3D7_01_v3	431539	-	3504	1.181	0.053	2.308	-0.835	2.129	0.0407	0.0407	-3.749	replication factor c protein, putative	NA
2356	PF3D7_0905300	Pf3D7_09_v3	251353	-	18357	0.464	0.021	0.908	4.194	2.127	0.0408	0.0408	-3.999	dynein heavy chain, putative	NA
1838	PF3D7_0720800	Pf3D7_07_v3	899751	+	1387	0.514	0.023	1.005	3.57	2.127	0.0409	0.0409	-3.958	Ham1-like protein, putative	NA
2008	PF3D7_0804500	Pf3D7_08_v3	250083	+	18355	0.347	0.015	0.679	7.046	2.124	0.0411	0.0411	-4.293	conserved Plasmodium membrane protein, unknown function	NA
2635	PF3D7_0932400	Pf3D7_09_v3	1292117	-	1527	0.771	0.033	1.509	1.015	2.124	0.0411	0.0411	-3.81	peptide chain release factor 1	RF1
4504	PF3D7_1331600	Pf3D7_13_v3	1316496	-	1311	0.949	0.038	1.86	0.541	2.119	0.0416	0.0416	-3.781	protein tyrosine phosphatase-like protein, putative	PTPLA
2942	PF3D7_1024500	Pf3D7_10_v3	1026120	+	795	0.889	0.034	1.745	1.679	2.115	0.042	0.042	-3.857	conserved Plasmodium protein, unknown function	NA
1211	PF3D7_0525200	Pf3D7_05_v3	1045462	+	5792	0.474	0.018	0.93	5.39	2.113	0.0421	0.0421	-4.131	structural maintenance of chromosomes protein 6, putative	SMC6
4904	PF3D7_1372100	Pf3D7_13_v3	2837053	+	2006	0.825	0.03	1.62	2.369	2.111	0.0424	0.0424	-3.952	Plasmodium exported protein (PHISTb), unknown function	GEXP04
3903	PF3D7_1227600	Pf3D7_12_v3	1124788	+	3553	0.66	0.024	1.297	2.98	2.109	0.0425	0.0425	-3.944	cyclin related protein, putative	NA
2919	PF3D7_1022200	Pf3D7_10_v3	926831	-	2190	0.483	0.017	0.948	4.1	2.108	0.0426	0.0426	-4.054	conserved Plasmodium membrane protein, unknown function	NA
2735	PF3D7_1004400	Pf3D7_10_v3	207000	-	2643	0.566	0.02	1.113	5.594	2.106	0.0428	0.0428	-4.245	RNA-binding protein, putative	NA
488	PF3D7_0304600	Pf3D7_03_v3	221323	-	1194	1.031	0.035	2.027	6.241	2.115	0.043	0.043	-4.245	circumsporozoite (CS) protein	CSP
1365	PF3D7_0607200	Pf3D7_06_v3	301874	-	1417	0.76	0.024	1.496	0.065	2.099	0.0434	0.0434	-3.803	RING zinc finger protein, putative	NA
2245	PF3D7_0828100	Pf3D7_08_v3	1212337	-	3294	0.784	0.024	1.544	1.821	2.098	0.0436	0.0436	-3.911	conserved Plasmodium protein, unknown function	NA
2071	PF3D7_0810800	Pf3D7_08_v3	548200	+	2417	0.873	0.027	1.718	6.268	2.107	0.0436	0.0436	-4.295	hydroxymethyldihydropterin pyrophosphokinase-dihydropteroate synthase	PPPK-DHPS
2366	PF3D7_0906100	Pf3D7_09_v3	305070	+	1557	0.579	0.017	1.141	1.149	2.096	0.0437	0.0437	-3.857	vacuolar protein sorting-associated protein 46, putative	VPS46
1388	PF3D7_0609400	Pf3D7_06_v3	399813	-	1812	0.665	0.02	1.311	2.984	2.096	0.0437	0.0437	-4.004	mitochondrial cardiolipin synthase, putative	CLS
3965	PF3D7_1233700	Pf3D7_12_v3	1403139	+	1746	0.621	0.016	1.226	1.59	2.089	0.0444	0.0444	-3.89	homocysteine S-methyltransferase, putative	NA
4784	PF3D7_1359600	Pf3D7_13_v3	2371882	+	6078	0.779	0.021	1.537	4.556	2.091	0.0444	0.0444	-4.137	conserved Plasmodium protein, unknown function	NA
388	PF3D7_0218200	Pf3D7_02_v3	743289	-	2424	0.534	0.014	1.053	3.488	2.088	0.0445	0.0445	-4.074	conserved Plasmodium protein, unknown function	NA
3379	PF3D7_1126600	Pf3D7_11_v3	1037643	-	2049	0.553	0.014	1.091	3.744	2.087	0.0446	0.0446	-4.075	steryl ester hydrolase, putative	NA
2514	PF3D7_0920700	Pf3D7_09_v3	849515	+	1782	0.789	0.02	1.557	0.398	2.086	0.0446	0.0446	-3.842	conserved Plasmodium protein, unknown function	NA
4284	PF3D7_1310000	Pf3D7_13_v3	448907	+	762	1.115	0.028	2.201	-2.802	2.086	0.0446	0.0446	-3.759	mitochondrial ATP synthase delta subunit, putative	OSCP
4167	PF3D7_1253800	Pf3D7_12_v3	2196157	+	966	3.93	0.096	7.763	1.665	2.105	0.0449	0.0449	-3.882	Plasmodium exported protein (PHISTa), unknown function	NA
4490	PF3D7_1330300	Pf3D7_13_v3	1276089	-	2285	0.379	0.009	0.75	4.512	2.082	0.0451	0.0451	-4.132	DnaJ protein, putative	NA
5415	PF3D7_1448500	Pf3D7_14_v3	1984189	-	11386	0.746	0.017	1.476	3.565	2.081	0.0452	0.0452	-4.046	conserved Plasmodium protein, unknown function	NA
1584	PF3D7_0628300	Pf3D7_06_v3	1170813	-	2884	0.869	0.019	1.719	6.948	2.088	0.0453	0.0453	-4.313	choline/ethanolaminephosphotransferase, putative	CEPT
932	PF3D7_0423500	Pf3D7_04_v3	1058997	+	1555	0.77	0.016	1.524	1.862	2.078	0.0455	0.0455	-3.933	glideosome associated protein with multiple membrane spans 2	GAPM2
3759	PF3D7_1213200	Pf3D7_12_v3	577529	+	837	0.608	0.012	1.205	2.903	2.075	0.0458	0.0458	-4.007	conserved Plasmodium protein, unknown function	NA
1285	PF3D7_0532300	Pf3D7_05_v3	1308278	+	1663	0.68	0.011	1.348	9.618	2.077	0.0464	0.0464	-4.561	Plasmodium exported protein (PHISTb), unknown function	NA
5337	PF3D7_1440700	Pf3D7_14_v3	1660095	-	2202	0.562	0.009	1.115	3.497	2.065	0.0467	0.0467	-4.134	adaptor complexes medium subunit family	NA
1801	PF3D7_0717000	Pf3D7_07_v3	738578	+	2632	1.062	0.016	2.107	-1.056	2.066	0.0467	0.0467	-3.821	conserved Plasmodium membrane protein, unknown function	NA
1078	PF3D7_0512000	Pf3D7_05_v3	527639	+	1028	0.474	0.007	0.942	5.647	2.063	0.0469	0.0469	-4.299	prefoldin subunit 6, putative	NA
861	PF3D7_0416400	Pf3D7_04_v3	718202	+	4453	0.557	0.008	1.107	5.194	2.061	0.0471	0.0471	-4.268	histone acetyltransferase, putative	HAT1
241	PF3D7_0203900	Pf3D7_02_v3	176567	+	1734	0.826	0.011	1.641	0.082	2.062	0.0471	0.0471	-3.884	5'-3' exonuclease, N-terminal resolvase-like domain, putative	NA
2645	PF3D7_0933400	Pf3D7_09_v3	1323893	+	807	0.903	0.012	1.793	-0.622	2.062	0.0471	0.0471	-3.846	conserved Plasmodium protein, unknown function	NA
4959	PF3D7_1404000	Pf3D7_14_v3	143984	+	678	0.593	0.007	1.18	0.595	2.058	0.0475	0.0475	-3.931	DNA-directed RNA polymerase II subunit RPB4, putative	RPB4
1259	PF3D7_0529800	Pf3D7_05_v3	1213533	+	5844	0.751	0.008	1.494	0.912	2.054	0.0478	0.0478	-3.921	conserved Plasmodium protein, unknown function	NA
3182	PF3D7_1107200	Pf3D7_11_v3	297823	+	2912	0.483	0.005	0.962	5.027	2.054	0.0479	0.0479	-4.256	conserved Plasmodium protein, unknown function	NA
4488	PF3D7_1330100	Pf3D7_13_v3	1274448	+	561	0.53	0.005	1.055	2.73	2.053	0.048	0.048	-4.031	conserved Plasmodium protein, unknown function	NA
4092	PF3D7_1246400	Pf3D7_12_v3	1931970	+	615	0.724	0.007	1.442	3.911	2.052	0.0481	0.0481	-4.135	myosin A tail domain interacting protein	MTIP
4709	PF3D7_1352000	Pf3D7_13_v3	2069317	+	6021	0.465	0.004	0.926	3.225	2.049	0.0483	0.0483	-4.092	conserved Plasmodium protein, unknown function	NA
1004	PF3D7_0504600	Pf3D7_05_v3	177410	+	1146	0.929	0.005	1.853	0.02	2.044	0.0489	0.0489	-3.917	2-oxoisovalerate dehydrogenase subunit beta, mitochondrial, putative	BCKDHB
998	PF3D7_0504000	Pf3D7_05_v3	157625	+	7344	0.508	0.002	1.014	4.045	2.041	0.0492	0.0492	-4.198	cation transporting P-ATPase	ATPase3
3219	PF3D7_1110900	Pf3D7_11_v3	431906	-	1740	0.379	0.001	0.756	6.984	2.039	0.0494	0.0494	-4.412	ES2 protein, putative	NA
460	PF3D7_0301800	Pf3D7_03_v3	104325	+	957	0.788	0.001	1.574	7.931	2.044	0.0497	0.0497	-4.451	Plasmodium exported protein, unknown function	NA

## Sheet: significant_down
	GeneID	Chr	Start	Strand	Length	logFC	CI.L	CI.R	AveExpr	t	P.Value	adj.P.Val	B	[Product Description]	[Gene Name or Symbol]
828	PF3D7_0413200	Pf3D7_04_v3	603166	-	1291	-2.517	-3.917	-1.118	-3.454	-3.658	0.000868	0.000868	-0.806	rifin	RIF
5669	PF3D7_1473700	Pf3D7_14_v3	2998594	-	3762	-2.075	-3.617	-0.534	6.902	-2.761	0.0102	0.0102	-2.996	nucleoporin NUP116/NSP116, putative	NUP116
5313	PF3D7_1438300	Pf3D7_14_v3	1546224	+	74	-1.963	-3.183	-0.743	-3.205	-3.272	0.00248	0.00248	-1.596	tRNA Methionine	NA
830	PF3D7_0413400	Pf3D7_04_v3	612798	+	1272	-1.949	-3.301	-0.596	-0.173	-2.934	0.00612	0.00612	-2.246	erythrocyte membrane protein 1 (PfEMP1), exon 1, pseudogene	VAR
2858	PF3D7_1016300	Pf3D7_10_v3	650898	-	2670	-1.924	-3.621	-0.226	9.532	-2.327	0.0279	0.0279	-4.09	glycophorin binding protein	GBP
913	PF3D7_0421600	Pf3D7_04_v3	986135	+	1313	-1.798	-3.129	-0.466	-1.767	-2.746	0.00964	0.00964	-2.612	erythrocyte membrane protein 1 (PfEMP1)-like pseudogene	VAR
170	PF3D7_0112700	Pf3D7_01_v3	477279	+	4104	-1.644	-2.81	-0.478	7.045	-2.888	0.0074	0.0074	-2.713	28S ribosomal RNA	NA
3628	PF3D7_1200300	Pf3D7_12_v3	30078	-	1184	-1.513	-2.912	-0.113	0.364	-2.202	0.035	0.035	-3.641	rifin	RIF
1616	PF3D7_0631500	Pf3D7_06_v3	1321320	-	775	-1.448	-2.596	-0.3	-0.464	-2.565	0.015	0.015	-2.958	exported protein family 3	EPF3
2706	PF3D7_1001600	Pf3D7_10_v3	86538	-	2472	-1.425	-2.392	-0.458	3.686	-3.002	0.00518	0.00518	-2.203	alpha/beta hydrolase, putative	NA
5781	PF3D7_API04900	Pf3D7_API_v3	24053	-	2696	-1.415	-2.622	-0.207	-0.476	-2.383	0.023	0.023	-3.29	large subunit ribosomal RNA	NA
4697	PF3D7_1350900	Pf3D7_13_v3	2027073	-	1566	-1.414	-2.538	-0.29	2.413	-2.562	0.0153	0.0153	-3.069	transcription factor with AP2 domain(s)	ApiAP2
1282	PF3D7_0532000	Pf3D7_05_v3	1292410	+	3790	-1.39	-2.557	-0.223	10.675	-2.443	0.0213	0.0213	-3.887	28S ribosomal RNA	NA
1280	PF3D7_0531800	Pf3D7_05_v3	1292052	+	159	-1.386	-2.495	-0.277	3.264	-2.547	0.016	0.016	-3.14	5.8S ribosomal RNA	NA
166	PF3D7_0112300	Pf3D7_01_v3	473739	+	2149	-1.351	-2.44	-0.262	5.876	-2.536	0.0168	0.0168	-3.367	18S ribosomal RNA	NA
5666	PF3D7_1473400	Pf3D7_14_v3	2989577	+	2646	-1.34	-2.266	-0.414	0.569	-2.942	0.00589	0.00589	-2.224	conserved Plasmodium protein, unknown function	NA
3109	PF3D7_1041200	Pf3D7_10_v3	1639171	+	1348	-1.331	-2.24	-0.423	0.886	-2.98	0.00533	0.00533	-2.14	rifin	RIF
5664	PF3D7_1473200	Pf3D7_14_v3	2981600	+	1365	-1.29	-2.404	-0.177	6.505	-2.372	0.0247	0.0247	-3.779	DnaJ protein, putative	NA
1889	PF3D7_0726000	Pf3D7_07_v3	1086570	+	3788	-1.289	-2.459	-0.119	8.915	-2.26	0.032	0.032	-4.151	28S ribosomal RNA	NA
2685	PF3D7_0937400	Pf3D7_09_v3	1477526	+	1211	-1.275	-2.522	-0.027	-0.99	-2.078	0.0454	0.0454	-3.806	rifin	RIF
2080	PF3D7_0811600	Pf3D7_08_v3	582983	-	3971	-1.272	-2.435	-0.108	2.955	-2.231	0.0332	0.0332	-3.765	conserved Plasmodium protein, unknown function	NA
1749	PF3D7_0711800	Pf3D7_07_v3	523147	+	135	-1.223	-2.328	-0.119	-4.118	-2.252	0.031	0.031	-3.485	Plasmodium RNA of unknown function RUF6	NA
5728	PF3D7_1479700	Pf3D7_14_v3	3276230	+	1272	-1.18	-2.103	-0.257	0.254	-2.6	0.0138	0.0138	-2.9	rifin	RIF
4412	PF3D7_1322600	Pf3D7_13_v3	955957	-	1539	-1.178	-1.949	-0.406	-2.056	-3.103	0.00388	0.00388	-1.91	conserved Plasmodium protein, unknown function	NA
1885	PF3D7_0725600	Pf3D7_07_v3	1083761	+	2087	-1.168	-2.308	-0.028	7.988	-2.101	0.0449	0.0449	-4.387	18S ribosomal RNA	NA
3980	PF3D7_1235200	Pf3D7_12_v3	1464219	-	3354	-1.146	-1.839	-0.453	1.001	-3.364	0.00194	0.00194	-1.298	V-type K+-independent H+-translocating inorganic pyrophosphatase	VP2
3758	PF3D7_1213100	Pf3D7_12_v3	576417	-	164	-1.141	-2.118	-0.165	2.668	-2.379	0.0234	0.0234	-3.43	U1 spliceosomal RNA	NA
1751	PF3D7_0712000	Pf3D7_07_v3	527338	-	7794	-1.11	-2.094	-0.127	4.129	-2.301	0.0282	0.0282	-3.702	erythrocyte membrane protein 1, PfEMP1	VAR
5113	PF3D7_1418800	Pf3D7_14_v3	782061	-	303	-1.103	-2.037	-0.17	4.114	-2.407	0.022	0.022	-3.475	signal recognition particle RNA	NA
4917	PF3D7_1373400	Pf3D7_13_v3	2881591	+	1366	-1.097	-2.184	-0.011	0.878	-2.053	0.0479	0.0479	-3.907	rifin	RIF
14	mal_rna_8	Pf_M76611	1638	+	43	-1.093	-2.063	-0.124	-4.333	-2.293	0.0283	0.0283	-3.418	unspecified product	SSUE
190	PF3D7_0114800	Pf3D7_01_v3	569485	-	788	-1.042	-2.043	-0.042	-1.349	-2.119	0.0416	0.0416	-3.732	Plasmodium exported protein (hyp7), unknown function	NA
783	PF3D7_0408800	Pf3D7_04_v3	422011	-	948	-1.007	-1.976	-0.038	-3.983	-2.112	0.0422	0.0422	-3.706	conserved Plasmodium protein, unknown function	NA
5714	PF3D7_1478300	Pf3D7_14_v3	3221001	+	576	-0.98	-1.952	-0.009	-2.753	-2.052	0.0481	0.0481	-3.812	Plasmodium exported protein, unknown function, pseudogene	NA
3426	PF3D7_1131100	Pf3D7_11_v3	1195988	-	2322	-0.979	-1.812	-0.147	2.367	-2.392	0.0225	0.0225	-3.411	serpentine receptor, putative	SR1
4598	PF3D7_1341000	Pf3D7_13_v3	1631333	+	74	-0.979	-1.735	-0.223	-1.418	-2.634	0.0127	0.0127	-2.825	tRNA Arginine	NA
3688	PF3D7_1206300	Pf3D7_12_v3	281020	-	8283	-0.977	-1.907	-0.047	3.621	-2.139	0.0401	0.0401	-3.978	conserved Plasmodium protein, unknown function	NA
5668	PF3D7_1473600	Pf3D7_14_v3	2997600	-	345	-0.962	-1.78	-0.143	0.722	-2.39	0.0226	0.0226	-3.32	conserved Plasmodium protein, unknown function	NA
2815	PF3D7_1012300	Pf3D7_10_v3	472546	-	841	-0.956	-1.67	-0.241	-0.251	-2.718	0.0103	0.0103	-2.673	cytochrome b-c1 complex subunit 7, putative	QCR7
4384	PF3D7_1319900	Pf3D7_13_v3	822078	-	4470	-0.927	-1.704	-0.15	2.634	-2.428	0.0207	0.0207	-3.34	conserved Plasmodium protein, unknown function	NA
2027	PF3D7_0806400	Pf3D7_08_v3	344288	+	534	-0.915	-1.704	-0.127	-1.69	-2.36	0.0242	0.0242	-3.318	glycosyltransferase family 28 protein, putative	NA
4455	PF3D7_1326900	Pf3D7_13_v3	1129363	-	3684	-0.893	-1.74	-0.046	4.128	-2.147	0.0393	0.0393	-3.978	conserved Plasmodium membrane protein, unknown function	NA
569	PF3D7_0312600	Pf3D7_03_v3	531213	+	77	-0.892	-1.763	-0.02	0.717	-2.081	0.0452	0.0452	-3.854	tRNA Valine	NA
3888	PF3D7_1226100	Pf3D7_12_v3	1058202	+	951	-0.891	-1.666	-0.116	3.121	-2.338	0.0255	0.0255	-3.538	haloacid dehalogenase-like hydrolase, putative	HAD3
1237	PF3D7_0527700	Pf3D7_05_v3	1150234	+	73	-0.89	-1.768	-0.013	-1.938	-2.064	0.0469	0.0469	-3.802	tRNA Glutamic acid	NA
2675	PF3D7_0936400	Pf3D7_09_v3	1440783	+	878	-0.874	-1.37	-0.378	5.631	-3.584	0.00106	0.00106	-0.895	ring-exported protein 4	REX4
417	PF3D7_0221000	Pf3D7_02_v3	848092	+	1028	-0.868	-1.713	-0.023	-2.244	-2.089	0.0444	0.0444	-3.76	Plasmodium exported protein, unknown function	NA
252	PF3D7_0205000	Pf3D7_02_v3	212982	-	1527	-0.86	-1.61	-0.11	1.41	-2.333	0.0258	0.0258	-3.457	conserved Plasmodium protein, unknown function	NA
2925	PF3D7_1022800	Pf3D7_10_v3	955883	+	2475	-0.856	-1.709	-0.003	-0.854	-2.041	0.0493	0.0493	-3.882	4-hydroxy-3-methylbut-2-en-1-yl diphosphate synthase	GcpE
3828	PF3D7_1220000	Pf3D7_12_v3	798304	-	1308	-0.811	-1.612	-0.011	0.174	-2.061	0.0471	0.0471	-3.871	zinc finger protein, putative	NA
4754	PF3D7_1356600	Pf3D7_13_v3	2240970	-	1443	-0.797	-1.407	-0.186	4.955	-2.655	0.0121	0.0121	-3.05	regulator of chromosome condensation, putative	NA
5071	PF3D7_1414600	Pf3D7_14_v3	590626	+	1563	-0.78	-1.271	-0.288	6.401	-3.227	0.0028	0.0028	-1.831	mRNA-capping enzyme subunit alpha	Pgt1
4464	PF3D7_1327800	Pf3D7_13_v3	1162620	+	1683	-0.771	-1.239	-0.302	7.234	-3.343	0.00205	0.00205	-1.595	ribose-phosphate pyrophosphokinase, putative	NA
2045	PF3D7_0808200	Pf3D7_08_v3	416344	-	1722	-0.756	-1.393	-0.119	2.336	-2.415	0.0214	0.0214	-3.341	plasmepsin X	NA
4493	PF3D7_1330500	Pf3D7_13_v3	1284988	+	2178	-0.752	-1.356	-0.147	3.761	-2.527	0.0164	0.0164	-3.201	conserved Plasmodium protein, unknown function	NA
2454	PF3D7_0914700	Pf3D7_09_v3	630657	+	1551	-0.749	-1.348	-0.151	6.343	-2.545	0.0157	0.0157	-3.369	major facilitator superfamily-related transporter, putative	MFR4
5360	PF3D7_1443000	Pf3D7_14_v3	1764316	-	3807	-0.74	-1.416	-0.063	1.165	-2.224	0.033	0.033	-3.642	serine/threonine protein kinase	SRPK2
4434	PF3D7_1324800	Pf3D7_13_v3	1036543	-	1989	-0.736	-1.348	-0.125	5.154	-2.449	0.0198	0.0198	-3.497	dihydrofolate synthase/folylpolyglutamate synthase	DHFS-FPGS
4101	PF3D7_1247200	Pf3D7_12_v3	1950989	-	525	-0.715	-1.187	-0.243	3.746	-3.078	0.00415	0.00415	-2.009	conserved Plasmodium protein, unknown function	NA
4984	PF3D7_1406300	Pf3D7_14_v3	228410	+	1428	-0.705	-1.386	-0.025	5.712	-2.109	0.0427	0.0427	-4.194	glycerophosphodiester phosphodiesterase	GDPD
2014	PF3D7_0805100	Pf3D7_08_v3	286959	+	1662	-0.704	-1.368	-0.041	0.582	-2.158	0.0382	0.0382	-3.727	conserved Plasmodium protein, unknown function	NA
1127	PF3D7_0516800	Pf3D7_05_v3	700120	-	7137	-0.703	-1.227	-0.179	3.931	-2.729	0.01	0.01	-2.81	transcription factor with AP2 domain(s)	ApiAP2
1443	PF3D7_0614700	Pf3D7_06_v3	612471	+	1928	-0.699	-1.348	-0.049	-0.731	-2.188	0.0357	0.0357	-3.643	conserved Plasmodium protein, unknown function	NA
1579	PF3D7_0627800	Pf3D7_06_v3	1114544	-	2994	-0.687	-1.049	-0.324	7.946	-3.854	0.000501	0.000501	-0.312	acetyl-CoA synthetase, putative	ACS
5526	PF3D7_1459500	Pf3D7_14_v3	2436695	+	2922	-0.671	-1.312	-0.029	1.217	-2.127	0.0409	0.0409	-3.818	conserved Plasmodium protein, unknown function	NA
1715	PF3D7_0708500	Pf3D7_07_v3	385583	-	2739	-0.668	-1.263	-0.073	8.52	-2.286	0.0291	0.0291	-4.074	heat shock protein 86 family protein	NA
1874	PF3D7_0724400	Pf3D7_07_v3	1023651	+	471	-0.663	-1.008	-0.319	5.298	-3.917	0.000419	0.000419	-0.012	mitochondrial import inner membrane translocase subunit TIM14, putative	PAM18
2451	PF3D7_0914400	Pf3D7_09_v3	617963	+	1873	-0.652	-1.277	-0.027	1.347	-2.122	0.0414	0.0414	-3.816	conserved Plasmodium protein, unknown function	NA
1056	PF3D7_0509800	Pf3D7_05_v3	410268	+	5041	-0.649	-1.144	-0.154	6.71	-2.667	0.0117	0.0117	-3.148	phosphatidylinositol 4-kinase	PI4K
2591	PF3D7_0928100	Pf3D7_09_v3	1136966	-	1218	-0.644	-1.182	-0.106	2.286	-2.434	0.0204	0.0204	-3.301	conserved Plasmodium protein, unknown function	NA
2058	PF3D7_0809500	Pf3D7_08_v3	478512	-	315	-0.64	-1.126	-0.154	4.295	-2.678	0.0114	0.0114	-2.921	histone acetyltransferase subunit NuA4, putative	NA
4833	PF3D7_1364500	Pf3D7_13_v3	2596389	+	1434	-0.634	-1.057	-0.211	6.049	-3.047	0.00449	0.00449	-2.235	exosome complex component RRP45, putative	RRP45
5623	PF3D7_1469100	Pf3D7_14_v3	2837319	+	783	-0.628	-1.249	-0.006	3.555	-2.054	0.0478	0.0478	-4.095	conserved Plasmodium protein, unknown function	NA
1438	PF3D7_0614200	Pf3D7_06_v3	593172	-	2733	-0.616	-1.156	-0.077	4.459	-2.325	0.0263	0.0263	-3.653	cytosolic Fe-S cluster assembly factor NAR1, putative	NAR1
1034	PF3D7_0507600	Pf3D7_05_v3	313199	+	1959	-0.613	-1.094	-0.133	5.309	-2.594	0.014	0.014	-3.174	cell differentiation protein, putative	CAF40
2776	PF3D7_1008500	Pf3D7_10_v3	351703	+	3891	-0.613	-0.897	-0.328	6.193	-4.377	0.000112	0.000112	1.173	conserved Plasmodium membrane protein, unknown function	NA
1667	PF3D7_0703800	Pf3D7_07_v3	149804	+	3177	-0.613	-1.21	-0.017	3.84	-2.092	0.0441	0.0441	-4.044	conserved Plasmodium protein, unknown function	NA
3958	PF3D7_1233000	Pf3D7_12_v3	1355317	-	2412	-0.601	-1.2	-0.002	2.787	-2.042	0.0491	0.0491	-4.048	elongation factor G	EF-G
3881	PF3D7_1225400	Pf3D7_12_v3	1031825	-	741	-0.595	-1.048	-0.142	5.422	-2.669	0.0116	0.0116	-3.027	conserved Plasmodium protein, unknown function	NA
5562	PF3D7_1463000	Pf3D7_14_v3	2565357	-	927	-0.595	-1.094	-0.097	3.917	-2.429	0.0207	0.0207	-3.405	conserved Plasmodium protein, unknown function	NA
5209	PF3D7_1428100	Pf3D7_14_v3	1098038	-	1914	-0.583	-0.921	-0.245	5.046	-3.507	0.00131	0.00131	-1.056	WW domain-binding protein 11, putative	NA
4218	PF3D7_1303600	Pf3D7_13_v3	178783	+	571	-0.582	-1.133	-0.032	2.427	-2.15	0.0389	0.0389	-3.837	conserved Plasmodium protein, unknown function	NA
1773	PF3D7_0714200	Pf3D7_07_v3	650834	+	4086	-0.577	-0.946	-0.207	6.911	-3.176	0.00321	0.00321	-1.977	conserved Plasmodium protein, unknown function	NA
5067	PF3D7_1414200	Pf3D7_14_v3	564024	-	1224	-0.568	-0.944	-0.192	6.436	-3.071	0.00422	0.00422	-2.199	conserved Plasmodium protein, unknown function	NA
2153	PF3D7_0818900	Pf3D7_08_v3	860384	+	2034	-0.557	-1.095	-0.019	13.003	-2.113	0.0429	0.0429	-4.638	heat shock protein 70	HSP70
535	PF3D7_0309300	Pf3D7_03_v3	397649	+	2868	-0.556	-0.927	-0.186	7.649	-3.054	0.0044	0.0044	-2.328	N2227-like protein, putative	NA
1176	PF3D7_0521700	Pf3D7_05_v3	882376	+	2526	-0.554	-1.018	-0.09	4.78	-2.43	0.0206	0.0206	-3.466	ATP-dependent RNA helicase DDX1, putative	DDX1
5125	PF3D7_1419900	Pf3D7_14_v3	825612	-	1719	-0.55	-0.979	-0.121	5.763	-2.606	0.0136	0.0136	-3.191	YTH domain-containing protein, putative	NA
1717	PF3D7_0708700	Pf3D7_07_v3	391502	-	687	-0.548	-1.071	-0.026	4.105	-2.135	0.0402	0.0402	-3.986	Cg8 protein	NA
358	PF3D7_0215300	Pf3D7_02_v3	628642	-	2667	-0.544	-0.95	-0.138	7.387	-2.723	0.0102	0.0102	-3.068	acyl-CoA synthetase	ACS8
2729	PF3D7_1003800	Pf3D7_10_v3	172723	-	3708	-0.536	-0.87	-0.202	8.116	-3.263	0.00254	0.00254	-1.842	U5 small nuclear ribonuclear protein, putative	NA
683	PF3D7_0323700	Pf3D7_03_v3	991544	-	2082	-0.535	-0.924	-0.146	8.96	-2.799	0.00844	0.00844	-2.986	U4/U6.U5 tri-snRNP-associated protein 1, putative	SART1
3580	PF3D7_1146000	Pf3D7_11_v3	1821032	-	1938	-0.533	-0.917	-0.149	7.323	-2.821	0.008	0.008	-2.843	ribosome assembly protein 4, putative	RSA4
2028	PF3D7_0806500	Pf3D7_08_v3	345427	-	2028	-0.53	-0.914	-0.147	6.989	-2.812	0.00818	0.00818	-2.847	DnaJ protein, putative	NA
1793	PF3D7_0716200	Pf3D7_07_v3	712469	+	2499	-0.528	-0.85	-0.207	9.724	-3.342	0.00206	0.00206	-1.724	conserved Plasmodium protein, unknown function	NA
249	PF3D7_0204700	Pf3D7_02_v3	205889	-	1515	-0.519	-0.831	-0.208	7.811	-3.392	0.0018	0.0018	-1.509	hexose transporter	HT
3859	PF3D7_1223200	Pf3D7_12_v3	932917	+	1365	-0.518	-0.901	-0.136	5.435	-2.756	0.0094	0.0094	-2.843	nucleus export protein BRR6, putative	NA
4535	PF3D7_1334700	Pf3D7_13_v3	1411100	-	609	-0.517	-1.003	-0.03	7.712	-2.158	0.0382	0.0382	-4.243	MSP7-like protein	MSRP7
1572	PF3D7_0627100	Pf3D7_06_v3	1089190	+	5139	-0.516	-0.94	-0.093	8.705	-2.479	0.0184	0.0184	-3.676	ankyrin-repeat protein, putative	NA
3566	PF3D7_1144600	Pf3D7_11_v3	1770949	+	954	-0.516	-0.841	-0.192	6.832	-3.236	0.00273	0.00273	-1.829	transcription initiation factor IIF subunit beta, putative	TFG2
2876	PF3D7_1018000	Pf3D7_10_v3	718454	+	1683	-0.513	-1.015	-0.011	4.347	-2.078	0.0455	0.0455	-4.097	tRNA pseudouridine synthase, putative	NA
2091	PF3D7_0812600	Pf3D7_08_v3	631584	-	646	-0.513	-0.929	-0.097	4.077	-2.508	0.0172	0.0172	-3.256	ubiquitin-conjugating enzyme, putative	NA
148	PF3D7_0110400	Pf3D7_01_v3	393875	-	961	-0.512	-0.951	-0.074	6.574	-2.377	0.0233	0.0233	-3.747	DNA-directed RNA polymerase II subunit RPB9, putative	RPB9
2538	PF3D7_0923000	Pf3D7_09_v3	939580	-	1008	-0.511	-0.836	-0.185	6.224	-3.19	0.00309	0.00309	-1.898	DNA-directed RNA polymerase II subunit RPB3, putative	RPB3
4891	PF3D7_1370300	Pf3D7_13_v3	2787972	+	942	-0.51	-1.009	-0.011	10.421	-2.082	0.0454	0.0454	-4.579	membrane associated histidine-rich protein	MAHRP1
3285	PF3D7_1117300	Pf3D7_11_v3	662000	+	387	-0.508	-0.957	-0.058	5.039	-2.295	0.0281	0.0281	-3.759	conserved Plasmodium protein, unknown function	NA
2515	PF3D7_0920800	Pf3D7_09_v3	852525	-	1533	-0.506	-0.941	-0.071	8.914	-2.366	0.0239	0.0239	-3.926	inosine-5'-monophosphate dehydrogenase	IMPDH
5499	PF3D7_1456800	Pf3D7_14_v3	2329933	-	2154	-0.501	-0.854	-0.148	9.787	-2.885	0.0068	0.0068	-2.839	V-type H(+)-translocating pyrophosphatase, putative	VP1
4425	PF3D7_1323900	Pf3D7_13_v3	989468	+	1131	-0.5	-0.858	-0.142	8.125	-2.839	0.00765	0.00765	-2.857	protein BCP1, putative	NA
5018	PF3D7_1409600	Pf3D7_14_v3	374800	+	2307	-0.499	-0.953	-0.046	5.68	-2.238	0.032	0.032	-3.927	conserved Plasmodium protein, unknown function	NA
5661	PF3D7_1472900	Pf3D7_14_v3	2972978	+	1077	-0.499	-0.925	-0.072	4.307	-2.378	0.0233	0.0233	-3.56	dihydroorotase, putative	NA
924	PF3D7_0422700	Pf3D7_04_v3	1040470	+	1173	-0.499	-0.877	-0.121	6.546	-2.685	0.0112	0.0112	-3.09	eukaryotic initiation factor 4A-III, putative	EIF4A3
2663	PF3D7_0935200	Pf3D7_09_v3	1368594	-	3444	-0.495	-0.965	-0.025	8.758	-2.141	0.0397	0.0397	-4.357	vacuolar protein sorting-associated protein 33, putative	VPS33
1415	PF3D7_0612100	Pf3D7_06_v3	509160	-	1971	-0.491	-0.795	-0.188	8.745	-3.292	0.00235	0.00235	-1.806	eukaryotic translation initiation factor 3 subunit L, putative	EIF3L
3305	PF3D7_1119200	Pf3D7_11_v3	722717	-	573	-0.485	-0.826	-0.143	7.509	-2.887	0.00677	0.00677	-2.703	conserved protein, unknown function	NA
5224	PF3D7_1429500	Pf3D7_14_v3	1164332	+	2235	-0.485	-0.86	-0.109	5.729	-2.626	0.0129	0.0129	-3.147	diphthamide biosynthesis protein 2, putative	DPH2
2011	PF3D7_0804800	Pf3D7_08_v3	278381	+	654	-0.484	-0.819	-0.148	7.117	-2.933	0.00602	0.00602	-2.572	peptidyl-prolyl cis-trans isomerase	CYP24
1408	PF3D7_0611400	Pf3D7_06_v3	471658	-	2493	-0.483	-0.957	-0.009	6.033	-2.073	0.0459	0.0459	-4.275	SWIB/MDM2 domain-containing protein	SWIB
4474	PF3D7_1328800	Pf3D7_13_v3	1214907	+	822	-0.483	-0.897	-0.069	6.737	-2.374	0.0235	0.0235	-3.765	transcriptional regulatory protein sir2a	SIR2A
2883	PF3D7_1018700	Pf3D7_10_v3	747028	+	1860	-0.482	-0.771	-0.192	8.326	-3.383	0.00184	0.00184	-1.555	conserved Plasmodium protein, unknown function	NA
2704	PF3D7_1001400	Pf3D7_10_v3	74661	-	2912	-0.48	-0.914	-0.047	8.617	-2.255	0.0308	0.0308	-4.133	alpha/beta hydrolase, putative	NA
5477	PF3D7_1454700	Pf3D7_14_v3	2241433	+	1407	-0.475	-0.798	-0.152	8.072	-2.991	0.00518	0.00518	-2.502	6-phosphogluconate dehydrogenase, decarboxylating, putative	NA
3791	PF3D7_1216400	Pf3D7_12_v3	653670	+	2766	-0.475	-0.94	-0.009	6.757	-2.071	0.0461	0.0461	-4.343	conserved Plasmodium membrane protein, unknown function	NA
2012	PF3D7_0804900	Pf3D7_08_v3	279711	-	1476	-0.475	-0.816	-0.134	6.746	-2.83	0.00781	0.00781	-2.785	GTPase-activating protein, putative	NA
4846	PF3D7_1365800	Pf3D7_13_v3	2629861	+	1582	-0.474	-0.817	-0.131	6.023	-2.81	0.00822	0.00822	-2.769	conserved Plasmodium protein, unknown function	NA
747	PF3D7_0405100	Pf3D7_04_v3	272255	-	4570	-0.471	-0.833	-0.11	7.546	-2.652	0.0122	0.0122	-3.243	protein transport protein Sec24B	SEC24B
1578	PF3D7_0627700	Pf3D7_06_v3	1108197	+	3444	-0.47	-0.816	-0.123	9.338	-2.756	0.0094	0.0094	-3.109	transportin	NA
1446	PF3D7_0615000	Pf3D7_06_v3	622272	+	441	-0.46	-0.919	-0.001	5.487	-2.039	0.0495	0.0495	-4.284	conserved Plasmodium protein, unknown function	NA
5525	PF3D7_1459400	Pf3D7_14_v3	2433361	-	1023	-0.459	-0.827	-0.092	7.219	-2.541	0.0159	0.0159	-3.46	conserved Plasmodium protein, unknown function	NA
3306	PF3D7_1119300	Pf3D7_11_v3	724855	-	885	-0.459	-0.785	-0.133	7.408	-2.861	0.00723	0.00723	-2.751	splicing factor U2AF small subunit, putative	U2AF1
4281	PF3D7_1309700	Pf3D7_13_v3	440265	+	5019	-0.458	-0.905	-0.011	5.967	-2.084	0.0449	0.0449	-4.257	vacuolar protein sorting-associated protein 18, putative	VPS18
5100	PF3D7_1417500	Pf3D7_14_v3	726979	-	1401	-0.457	-0.864	-0.05	8.002	-2.285	0.0288	0.0288	-4.027	H/ACA ribonucleoprotein complex subunit 4, putative	CBF5
1155	PF3D7_0519600	Pf3D7_05_v3	812648	+	2268	-0.456	-0.836	-0.075	7.199	-2.434	0.0204	0.0204	-3.687	zinc finger protein, putative	NA
2155	PF3D7_0819100	Pf3D7_08_v3	869562	+	1013	-0.455	-0.803	-0.108	6.18	-2.663	0.0118	0.0118	-3.109	BRIX domain, putative	NA
4555	PF3D7_1336700	Pf3D7_13_v3	1482361	-	477	-0.454	-0.811	-0.097	6.777	-2.586	0.0143	0.0143	-3.322	conserved Plasmodium protein, unknown function	NA
457	PF3D7_0301500	Pf3D7_03_v3	88250	-	982	-0.454	-0.825	-0.083	6.36	-2.491	0.0179	0.0179	-3.486	Plasmodium exported protein, unknown function	NA
1225	PF3D7_0526500	Pf3D7_05_v3	1090930	+	4155	-0.453	-0.845	-0.06	6.884	-2.346	0.0251	0.0251	-3.83	conserved Plasmodium protein, unknown function	NA
371	PF3D7_0216600	Pf3D7_02_v3	686485	+	2061	-0.453	-0.863	-0.042	6.901	-2.243	0.0316	0.0316	-4.032	MtN3-like protein	NA
2533	PF3D7_0922500	Pf3D7_09_v3	913230	+	1251	-0.453	-0.885	-0.021	9.519	-2.131	0.0406	0.0406	-4.432	phosphoglycerate kinase	PGK
5670	PF3D7_1473900	Pf3D7_14_v3	3007601	+	2559	-0.452	-0.831	-0.073	6.956	-2.426	0.0208	0.0208	-3.667	conserved Plasmodium protein, unknown function	NA
3296	PF3D7_1118300	Pf3D7_11_v3	694655	+	4467	-0.452	-0.778	-0.126	9.528	-2.817	0.00808	0.00808	-2.98	insulinase, putative	NA
3421	PF3D7_1130600	Pf3D7_11_v3	1176441	+	3265	-0.451	-0.876	-0.027	5.795	-2.161	0.0379	0.0379	-4.109	methyltransferase, putative	NA
4376	PF3D7_1319100	Pf3D7_13_v3	789437	+	2412	-0.44	-0.878	-0.002	6.618	-2.044	0.0489	0.0489	-4.369	conserved protein, unknown function	NA
4207	PF3D7_1302600	Pf3D7_13_v3	142860	-	1236	-0.437	-0.782	-0.091	6.341	-2.572	0.0147	0.0147	-3.316	deoxyhypusine hydroxylase	DOHH
1724	PF3D7_0709300	Pf3D7_07_v3	413560	-	8190	-0.436	-0.848	-0.024	6.289	-2.15	0.0389	0.0389	-4.179	Cg2 protein, putative	CG2
491	PF3D7_0304900	Pf3D7_03_v3	231793	-	513	-0.436	-0.842	-0.031	5.25	-2.188	0.0358	0.0358	-3.985	conserved Plasmodium protein, unknown function	NA
2994	PF3D7_1029600	Pf3D7_10_v3	1206302	+	1104	-0.435	-0.767	-0.103	8.663	-2.662	0.0118	0.0118	-3.282	adenosine deaminase	ADA
983	PF3D7_0502400	Pf3D7_05_v3	109898	-	1794	-0.435	-0.757	-0.113	8.594	-2.747	0.00962	0.00962	-3.092	merozoite surface protein 8	MSP8
2364	PF3D7_0905900	Pf3D7_09_v3	293585	-	3033	-0.432	-0.859	-0.006	7.658	-2.063	0.0469	0.0469	-4.428	coatomer subunit beta, putative	SEC27
3265	PF3D7_1115400	Pf3D7_11_v3	584328	-	1479	-0.428	-0.763	-0.093	7.582	-2.6	0.0138	0.0138	-3.357	cysteine proteinase falcipain 3	FP3
5342	PF3D7_1441200	Pf3D7_14_v3	1678662	+	825	-0.427	-0.826	-0.029	8.126	-2.183	0.0362	0.0362	-4.246	60S ribosomal protein L1, putative	NA
602	PF3D7_0315700	Pf3D7_03_v3	638283	+	3024	-0.425	-0.828	-0.022	4.337	-2.146	0.0392	0.0392	-3.981	conserved Plasmodium membrane protein, unknown function	NA
3936	PF3D7_1230800	Pf3D7_12_v3	1263661	+	1933	-0.425	-0.677	-0.174	8.807	-3.436	0.0016	0.0016	-1.446	pre-mRNA-splicing regulator, putative	NA
1521	PF3D7_0622200	Pf3D7_06_v3	903740	-	2583	-0.425	-0.765	-0.085	7.822	-2.54	0.0159	0.0159	-3.506	radical SAM protein, putative	NA
326	PF3D7_0212100	Pf3D7_02_v3	483436	+	5535	-0.423	-0.727	-0.118	8.056	-2.825	0.00791	0.00791	-2.885	conserved Plasmodium protein, unknown function	NA
4118	PF3D7_1248900	Pf3D7_12_v3	2002723	-	1308	-0.418	-0.811	-0.025	6.704	-2.165	0.0376	0.0376	-4.183	26S protease regulatory subunit 8, putative	RPT6
3819	PF3D7_1219100	Pf3D7_12_v3	757649	+	5994	-0.418	-0.744	-0.092	8.391	-2.604	0.0136	0.0136	-3.397	clathrin heavy chain, putative	NA
1203	PF3D7_0524400	Pf3D7_05_v3	1013453	-	1098	-0.418	-0.756	-0.079	7.81	-2.512	0.017	0.017	-3.558	ribosome-interacting GTPase 1, putative	RBG1
3814	PF3D7_1218600	Pf3D7_12_v3	732174	-	2786	-0.417	-0.742	-0.093	6.879	-2.616	0.0133	0.0133	-3.276	arginine--tRNA ligase	RSS
1267	PF3D7_0530600	Pf3D7_05_v3	1248368	-	1594	-0.417	-0.763	-0.071	6.261	-2.451	0.0196	0.0196	-3.563	XAP-5 DNA binding protein, putative	NA
5272	PF3D7_1434300	Pf3D7_14_v3	1372903	+	1695	-0.415	-0.708	-0.123	10.097	-2.888	0.00676	0.00676	-2.846	Hsp70/Hsp90 organizing protein	HOP
2435	PF3D7_0912800	Pf3D7_09_v3	563329	-	1851	-0.411	-0.73	-0.091	7.058	-2.612	0.0134	0.0134	-3.294	tRNA (adenine(58)-N(1))-methyltransferase non-catalytic subunit TRM6, putative	GCD10
2440	PF3D7_0913300	Pf3D7_09_v3	576960	-	2067	-0.409	-0.795	-0.022	8.528	-2.151	0.0388	0.0388	-4.336	conserved Plasmodium protein, unknown function	NA
3396	PF3D7_1128200	Pf3D7_11_v3	1097117	+	411	-0.409	-0.799	-0.018	6.315	-2.127	0.0409	0.0409	-4.209	multiprotein-bridging factor 1, putative	MBF1
1144	PF3D7_0518500	Pf3D7_05_v3	763532	-	3372	-0.406	-0.785	-0.026	8.254	-2.175	0.0368	0.0368	-4.26	ATP-dependent RNA helicase DDX23, putative	DDX23
5431	PF3D7_1450100	Pf3D7_14_v3	2051621	-	1503	-0.406	-0.764	-0.048	8.747	-2.306	0.0274	0.0274	-4.034	signal recognition particle subunit SRP54	SRP54
5359	PF3D7_1442900	Pf3D7_14_v3	1753510	+	10155	-0.403	-0.771	-0.035	9.638	-2.228	0.0327	0.0327	-4.24	protein transport protein SEC7, putative	SEC7
1223	PF3D7_0526300	Pf3D7_05_v3	1085623	-	972	-0.401	-0.702	-0.101	6.471	-2.716	0.0104	0.0104	-3.016	nucleolar Jumonji domain interacting protein, putative	NA
2371	PF3D7_0906600	Pf3D7_09_v3	320811	-	2532	-0.399	-0.765	-0.033	9.572	-2.219	0.0334	0.0334	-4.254	zinc finger protein, putative	NA
4698	PF3D7_1351000	Pf3D7_13_v3	2033838	+	6045	-0.396	-0.733	-0.059	8.648	-2.388	0.0227	0.0227	-3.871	phosphatidylinositol transfer protein, putative	NA
314	PF3D7_0210900	Pf3D7_02_v3	442080	-	855	-0.39	-0.626	-0.155	8.968	-3.371	0.0019	0.0019	-1.615	conserved Plasmodium protein, unknown function	NA
3751	PF3D7_1212500	Pf3D7_12_v3	552102	-	1752	-0.39	-0.778	-0.002	7.694	-2.045	0.0488	0.0488	-4.473	glycerol-3-phosphate 1-O-acyltransferase	GAT
4608	PF3D7_1342000	Pf3D7_13_v3	1653211	-	921	-0.385	-0.716	-0.053	10.729	-2.359	0.0243	0.0243	-4.042	40S ribosomal protein S6	NA
5157	PF3D7_1423000	Pf3D7_14_v3	924964	-	1464	-0.385	-0.661	-0.108	7.964	-2.829	0.00783	0.00783	-2.866	nucleolar GTP-binding protein 2, putative	NOG2
4435	PF3D7_1324900	Pf3D7_13_v3	1041157	+	951	-0.382	-0.754	-0.01	10.753	-2.088	0.0445	0.0445	-4.577	L-lactate dehydrogenase	LDH
4056	PF3D7_1242800	Pf3D7_12_v3	1805380	-	1977	-0.381	-0.66	-0.103	9.096	-2.785	0.00874	0.00874	-3.034	rab specific GDP dissociation inhibitor	rabGDI
1776	PF3D7_0714500	Pf3D7_07_v3	664956	+	1212	-0.38	-0.735	-0.025	5.974	-2.179	0.0365	0.0365	-4.078	transcription elongation factor s-II, putative	NA
3766	PF3D7_1213900	Pf3D7_12_v3	595167	-	3610	-0.374	-0.74	-0.008	8.47	-2.076	0.0456	0.0456	-4.46	conserved Plasmodium protein, unknown function	NA
4516	PF3D7_1332800	Pf3D7_13_v3	1348779	+	744	-0.374	-0.707	-0.041	7.23	-2.286	0.0287	0.0287	-3.979	eukaryotic translation initiation factor 6, putative	NA
1360	PF3D7_0606700	Pf3D7_06_v3	282049	+	4969	-0.37	-0.641	-0.099	9.018	-2.779	0.00888	0.00888	-3.042	coatomer alpha subunit, putative	NA
2879	PF3D7_1018300	Pf3D7_10_v3	729809	-	3048	-0.37	-0.704	-0.035	8.067	-2.245	0.0315	0.0315	-4.113	conserved Plasmodium protein, unknown function	NA
2393	PF3D7_0908600	Pf3D7_09_v3	399202	-	1524	-0.369	-0.691	-0.047	6.41	-2.333	0.0258	0.0258	-3.812	ribosomal RNA methyltransferase, putative	NA
4680	PF3D7_1349200	Pf3D7_13_v3	1971890	-	2592	-0.368	-0.677	-0.06	8.907	-2.426	0.0208	0.0208	-3.798	glutamate--tRNA ligase, putative	NA
2169	PF3D7_0820500	Pf3D7_08_v3	925113	+	2559	-0.367	-0.689	-0.044	7.39	-2.312	0.0271	0.0271	-3.935	C-13 antigen	NA
3330	PF3D7_1121700	Pf3D7_11_v3	820073	+	2448	-0.367	-0.733	-0.002	7.075	-2.044	0.0489	0.0489	-4.428	protein GCN20	GCN20
5474	PF3D7_1454400	Pf3D7_14_v3	2234143	+	2334	-0.366	-0.65	-0.082	9.118	-2.619	0.0131	0.0131	-3.404	aminopeptidase P	APP
528	PF3D7_0308600	Pf3D7_03_v3	372632	+	1599	-0.366	-0.7	-0.032	7.652	-2.226	0.0329	0.0329	-4.129	pre-mRNA-processing factor 19, putative	PRPF19
3544	PF3D7_1142400	Pf3D7_11_v3	1702089	-	1554	-0.363	-0.652	-0.074	7.136	-2.558	0.0152	0.0152	-3.415	coproporphyrinogen-III oxidase	CPO
788	PF3D7_0409200	Pf3D7_04_v3	438887	+	1449	-0.362	-0.688	-0.035	7.803	-2.255	0.0308	0.0308	-4.073	protein SOF1, putative	SOF1
1358	PF3D7_0606500	Pf3D7_06_v3	265839	-	2561	-0.361	-0.638	-0.085	8.784	-2.655	0.0121	0.0121	-3.3	polypyrimidine tract-binding protein, putative	NA
3307	PF3D7_1119400	Pf3D7_11_v3	727896	+	6444	-0.361	-0.639	-0.083	7.683	-2.638	0.0126	0.0126	-3.275	ubiquitin-protein ligase, putative	NA
470	PF3D7_0302800	Pf3D7_03_v3	148046	-	1260	-0.36	-0.716	-0.004	6.693	-2.057	0.0476	0.0476	-4.366	conserved Plasmodium protein, unknown function	NA
603	PF3D7_0315800	Pf3D7_03_v3	641482	-	1098	-0.36	-0.668	-0.053	6.623	-2.383	0.023	0.023	-3.73	zinc finger protein, putative	NA
2862	PF3D7_1016700	Pf3D7_10_v3	669202	-	2652	-0.358	-0.694	-0.023	8.533	-2.174	0.0368	0.0368	-4.27	Plasmodium exported protein (PHISTc), unknown function	NA
3279	PF3D7_1116700	Pf3D7_11_v3	630779	-	2103	-0.357	-0.623	-0.09	9.999	-2.722	0.0102	0.0102	-3.223	dipeptidyl aminopeptidase 1	DPAP1
4467	PF3D7_1328100	Pf3D7_13_v3	1184208	+	813	-0.355	-0.677	-0.032	6.996	-2.237	0.032	0.032	-4.066	proteasome subunit beta type-7, putative	NA
4000	PF3D7_1237200	Pf3D7_12_v3	1550324	+	5748	-0.354	-0.705	-0.004	7.895	-2.058	0.0474	0.0474	-4.455	conserved Plasmodium protein, unknown function	NA
2622	PF3D7_0931100	Pf3D7_09_v3	1254815	+	2478	-0.349	-0.68	-0.019	10.362	-2.151	0.0388	0.0388	-4.425	nucleolar protein Nop52, putative	NA
787	PF3D7_0409100	Pf3D7_04_v3	436217	-	1765	-0.347	-0.69	-0.005	8.874	-2.06	0.0472	0.0472	-4.507	U4/U6 small nuclear ribonucleoprotein PRP31, putative	PRPF31
4298	PF3D7_1311400	Pf3D7_13_v3	487511	+	1314	-0.345	-0.635	-0.055	8.331	-2.42	0.0211	0.0211	-3.788	AP-1 complex subunit mu-1	AP1M1
2981	PF3D7_1028400	Pf3D7_10_v3	1169940	+	1452	-0.344	-0.623	-0.066	7.322	-2.513	0.017	0.017	-3.518	nucleolar preribosomal assembly protein, putative	NA
4999	PF3D7_1407800	Pf3D7_14_v3	283086	+	1350	-0.342	-0.624	-0.06	9.526	-2.467	0.0189	0.0189	-3.747	plasmepsin IV	PM4
2095	PF3D7_0813000	Pf3D7_08_v3	643086	-	1800	-0.341	-0.595	-0.086	7.724	-2.724	0.0102	0.0102	-3.084	conserved Plasmodium protein, unknown function	NA
2378	PF3D7_0907200	Pf3D7_09_v3	345892	+	3402	-0.341	-0.677	-0.004	8.457	-2.058	0.0475	0.0475	-4.49	GTPase-activating protein, putative	NA
4625	PF3D7_1343700	Pf3D7_13_v3	1724817	-	2181	-0.338	-0.672	-0.005	9.138	-2.064	0.0468	0.0468	-4.517	kelch protein K13	K13
2990	PF3D7_1029200	Pf3D7_10_v3	1195677	+	1668	-0.338	-0.602	-0.075	6.624	-2.613	0.0134	0.0134	-3.251	WD repeat-containing protein, putative	NA
1210	PF3D7_0525100	Pf3D7_05_v3	1041745	+	2022	-0.337	-0.649	-0.025	9.251	-2.194	0.0353	0.0353	-4.279	acyl-CoA synthetase	ACS10
1440	PF3D7_0614400	Pf3D7_06_v3	604573	+	768	-0.336	-0.656	-0.017	6.458	-2.139	0.0398	0.0398	-4.213	pre-mRNA-splicing factor CWF7, putative	CWF7
5198	PF3D7_1427100	Pf3D7_14_v3	1056162	+	3963	-0.332	-0.656	-0.008	9.555	-2.081	0.0452	0.0452	-4.516	lipase, putative	NA
3187	PF3D7_1107700	Pf3D7_11_v3	326881	+	1932	-0.328	-0.601	-0.054	8.414	-2.434	0.0204	0.0204	-3.754	pescadillo homolog	PES
3481	PF3D7_1136400	Pf3D7_11_v3	1427011	-	2661	-0.327	-0.608	-0.046	8.362	-2.366	0.0239	0.0239	-3.891	signal recognition particle subunit SRP72, putative	SRP72
4385	PF3D7_1320000	Pf3D7_13_v3	829534	+	3777	-0.326	-0.622	-0.03	8.442	-2.236	0.0321	0.0321	-4.157	golgi protein 1	GP1
3696	PF3D7_1207100	Pf3D7_12_v3	324336	-	2523	-0.326	-0.639	-0.012	9.998	-2.114	0.0421	0.0421	-4.477	small subunit rRNA processing factor, putative	NA
684	PF3D7_0323800	Pf3D7_03_v3	998649	+	2934	-0.319	-0.609	-0.028	8.035	-2.227	0.0328	0.0328	-4.153	conserved Plasmodium protein, unknown function	NA
2401	PF3D7_0909400	Pf3D7_09_v3	424171	+	3936	-0.318	-0.63	-0.007	8.387	-2.076	0.0456	0.0456	-4.455	exoribonuclease, putative	NA
2030	PF3D7_0806700	Pf3D7_08_v3	354472	+	7925	-0.317	-0.587	-0.048	7.903	-2.392	0.0225	0.0225	-3.811	conserved Plasmodium membrane protein, unknown function	NA
5130	PF3D7_1420400	Pf3D7_14_v3	846508	+	2670	-0.314	-0.608	-0.02	9.147	-2.173	0.037	0.037	-4.321	glycine--tRNA ligase	GlyRS
1511	PF3D7_0621300	Pf3D7_06_v3	873809	+	2382	-0.314	-0.616	-0.012	7.962	-2.114	0.0421	0.0421	-4.362	mRNA binding Pumilio-homology domain protein, putative	NA
1423	PF3D7_0612900	Pf3D7_06_v3	531126	+	2061	-0.312	-0.579	-0.045	9.717	-2.375	0.0234	0.0234	-3.948	nucleolar GTP-binding protein 1, putative	NA
2671	PF3D7_0936000	Pf3D7_09_v3	1427642	-	381	-0.312	-0.622	-0.001	10.12	-2.041	0.0492	0.0492	-4.627	ring-exported protein 2	REX2
2781	PF3D7_1009000	Pf3D7_10_v3	371293	+	825	-0.309	-0.607	-0.01	6.268	-2.104	0.0429	0.0429	-4.242	diphthine methyl ester synthase, putative	DPH5
1136	PF3D7_0517700	Pf3D7_05_v3	743179	+	2151	-0.309	-0.605	-0.013	9.824	-2.123	0.0412	0.0412	-4.455	eukaryotic translation initiation factor 3 subunit B, putative	EIF3B
5151	PF3D7_1422400	Pf3D7_14_v3	900386	+	4893	-0.304	-0.561	-0.046	7.459	-2.401	0.0221	0.0221	-3.762	conserved Plasmodium protein, unknown function	NA
1535	PF3D7_0623600	Pf3D7_06_v3	956765	+	1992	-0.3	-0.568	-0.033	7.749	-2.281	0.029	0.029	-4.017	transcription or splicing factor-like protein, putative	NA
1132	PF3D7_0517300	Pf3D7_05_v3	724681	-	1071	-0.299	-0.553	-0.045	9.949	-2.39	0.0226	0.0226	-3.933	serine/arginine-rich splicing factor 1	SR1
3035	PF3D7_1033600	Pf3D7_10_v3	1344150	-	2748	-0.298	-0.594	-0.002	8.566	-2.046	0.0487	0.0487	-4.523	myb2 transcription factor, putative	Myb2
5052	PF3D7_1412800	Pf3D7_14_v3	516574	-	1620	-0.297	-0.564	-0.029	9.166	-2.252	0.031	0.031	-4.164	glycylpeptide N-tetradecanoyltransferase	NMT
1242	PF3D7_0528200	Pf3D7_05_v3	1163408	-	1665	-0.287	-0.536	-0.038	8.916	-2.346	0.025	0.025	-3.968	eukaryotic translation initiation factor 3 subunit E, putative	EIF3E
3805	PF3D7_1217700	Pf3D7_12_v3	696895	-	1563	-0.283	-0.566	-0.001	7.124	-2.042	0.0491	0.0491	-4.429	conserved Plasmodium protein, unknown function	NA
301	PF3D7_0209700	Pf3D7_02_v3	400153	-	1707	-0.278	-0.529	-0.027	8.915	-2.255	0.0308	0.0308	-4.148	RING zinc finger protein, putative	NA
2180	PF3D7_0821600	Pf3D7_08_v3	969690	+	2025	-0.277	-0.55	-0.004	6.423	-2.062	0.047	0.047	-4.334	clp1-related protein, putative	NA
2818	PF3D7_1012600	Pf3D7_10_v3	482527	-	1668	-0.272	-0.543	0	9.157	-2.035	0.0499	0.0499	-4.573	GMP synthase [glutamine-hydrolyzing]	GMPS
4491	PF3D7_1330400	Pf3D7_13_v3	1279800	-	1486	-0.249	-0.495	-0.003	6.931	-2.056	0.0476	0.0476	-4.389	ER lumen protein retaining receptor 1, putative, unspecified product	NA
4492	PF3D7_1330400	Pf3D7_13_v3	1279800	-	1486	-0.249	-0.495	-0.003	6.931	-2.056	0.0476	0.0476	-4.389	ER lumen protein retaining receptor 1, putative, unspecified product	NA
3209	PF3D7_1109900	Pf3D7_11_v3	397124	+	652	-0.245	-0.48	-0.01	8.363	-2.123	0.0413	0.0413	-4.373	60S ribosomal protein L36	RPL36

## Sheet: manual selection_PfEMP1 biology
	GeneID	Chr	Start	Strand	Length	logFC	CI.L	CI.R	AveExpr	t	P.Value	adj.P.Val	B	logFC (severe)	adj.P.Val (severe)	[Product Description]	[Gene Name or Symbol]
1841	PF3D7_0721100	Pf3D7_07_v3	916434	+	735	1.294	0.66	1.929	3.681	4.148	0.000217	0.000217	0.612	1.147	0.00347	conserved Plasmodium protein, unknown function	NA
2675	PF3D7_0936400	Pf3D7_09_v3	1440783	+	878	-0.874	-1.37	-0.378	5.631	-3.584	0.00106	0.00106	-0.895	-0.399	0.246	ring-exported protein 4	REX4
2327	PF3D7_0902500	Pf3D7_09_v3	109334	-	1996	0.507	0.206	0.808	8.647	3.427	0.00164	0.00164	-1.444	0.101	0.62	serine/threonine protein kinase, FIKK family	FIKK9.6
2365	PF3D7_0906000	Pf3D7_09_v3	298665	-	5515	0.89	0.325	1.454	3.323	3.206	0.00296	0.00296	-1.713	0.785	0.027	exoribonuclease II	RNaseII
4531	PF3D7_1334300	Pf3D7_13_v3	1400897	-	1380	1.154	0.358	1.95	2.788	2.947	0.00581	0.00581	-2.284	1.065	0.0282	MSP7-like protein	MSRP5
2329	PF3D7_0902700	Pf3D7_09_v3	119261	-	1489	1.141	0.305	1.978	2.209	2.774	0.00899	0.00899	-2.627	0.768	0.119	Plasmodium exported protein (PHISTb), unknown function, pseudogene	NA
1127	PF3D7_0516800	Pf3D7_05_v3	700120	-	7137	-0.703	-1.227	-0.179	3.931	-2.729	0.01	0.01	-2.81	-0.847	0.00515	transcription factor with AP2 domain(s)	ApiAP2
5693	PF3D7_1476200	Pf3D7_14_v3	3133951	+	1701	1.092	0.273	1.911	6.368	2.72	0.0107	0.0107	-3.063	1.45	0.00196	Plasmodium exported protein (PHISTb), unknown function	NA
1286	PF3D7_0532400	Pf3D7_05_v3	1312471	+	1684	0.72	0.172	1.267	7.337	2.674	0.0116	0.0116	-3.215	0.773	0.0202	lysine-rich membrane-associated PHISTb protein	LyMP
4697	PF3D7_1350900	Pf3D7_13_v3	2027073	-	1566	-1.414	-2.538	-0.29	2.413	-2.562	0.0153	0.0153	-3.069	-1.048	0.112	transcription factor with AP2 domain(s)	ApiAP2
4533	PF3D7_1334500	Pf3D7_13_v3	1405731	-	1782	1.015	0.145	1.884	1.438	2.373	0.0235	0.0235	-3.381	0.683	0.183	MSP7-like protein	MSRP6
4474	PF3D7_1328800	Pf3D7_13_v3	1214907	+	822	-0.483	-0.897	-0.069	6.737	-2.374	0.0235	0.0235	-3.765	-0.266	0.292	transcriptional regulatory protein sir2a	SIR2A
2858	PF3D7_1016300	Pf3D7_10_v3	650898	-	2670	-1.924	-3.621	-0.226	9.532	-2.327	0.0279	0.0279	-4.09	-0.236	0.836	glycophorin binding protein	GBP
2708	PF3D7_1001800	Pf3D7_10_v3	96113	-	919	0.477	0.048	0.906	6.932	2.26	0.0305	0.0305	-3.969	0.473	0.0552	Plasmodium exported protein (PHISTc), unknown function
950	PF3D7_0425250	Pf3D7_04_v3	1138009	-	551	1.82	0.178	3.462	-2.445	2.257	0.0309	0.0309	-3.49	0.678	0.499	Plasmodium exported protein (PHIST), unknown function, pseudogene	NA
1749	PF3D7_0711800	Pf3D7_07_v3	523147	+	135	-1.223	-2.328	-0.119	-4.118	-2.252	0.031	0.031	-3.485	-1.239	0.065	Plasmodium RNA of unknown function RUF6	NA
951	PF3D7_0425300	Pf3D7_04_v3	1141222	+	875	1.44	0.12	2.761	-1.588	2.218	0.0334	0.0334	-3.559	-0.181	0.816	Plasmodium exported protein (PHISTa), unknown function, pseudogene
945	PF3D7_0424800	Pf3D7_04_v3	1123986	+	1019	0.664	0.041	1.288	6.748	2.169	0.0374	0.0374	-4.13	0.692	0.0517	Plasmodium exported protein (PHISTb), unknown function
4535	PF3D7_1334700	Pf3D7_13_v3	1411100	-	609	-0.517	-1.003	-0.03	7.712	-2.158	0.0382	0.0382	-4.243	0.029	0.917	MSP7-like protein	MSRP7
4904	PF3D7_1372100	Pf3D7_13_v3	2837053	+	2006	0.825	0.03	1.62	2.369	2.111	0.0424	0.0424	-3.952	0.667	0.138	Plasmodium exported protein (PHISTb), unknown function (GEXP04)
4167	PF3D7_1253800	Pf3D7_12_v3	2196157	+	966	3.93	0.096	7.763	1.665	2.105	0.0449	0.0449	-3.882	2.019	0.365	Plasmodium exported protein (PHISTa), unknown function	NA
4891	PF3D7_1370300	Pf3D7_13_v3	2787972	+	942	-0.51	-1.009	-0.011	10.421	-2.082	0.0454	0.0454	-4.579	-0.1	0.759	membrane associated histidine-rich protein	MAHRP1
1408	PF3D7_0611400	Pf3D7_06_v3	471658	-	2493	-0.483	-0.957	-0.009	6.033	-2.073	0.0459	0.0459	-4.275	-0.349	0.213	SWIB/MDM2 domain-containing protein	SWIB
1285	PF3D7_0532300	Pf3D7_05_v3	1308278	+	1663	0.68	0.011	1.348	9.618	2.077	0.0464	0.0464	-4.561	0.936	0.0199	Plasmodium exported protein (PHISTb), unknown function
2671	PF3D7_0936000	Pf3D7_09_v3	1427642	-	381	-0.312	-0.622	-0.001	10.12	-2.041	0.0492	0.0492	-4.627	0.114	0.541	ring-exported protein 2	REX2
3299	PF3D7_1118600	Pf3D7_11_v3	705556	-	1827	-0.32	-0.666	0.026	7.742	-1.879	0.069	0.069	-4.757	-0.113	0.575	histone acetyltransferase	MYST
4741	PF3D7_1355300	Pf3D7_13_v3	2195449	+	1530	-0.382	-0.81	0.046	6.298	-1.813	0.0789	0.0789	-4.747	-0.368	0.134	histone-lysine N-methyltransferase, putative	SET6
5293	PF3D7_1436300	Pf3D7_14_v3	1479777	+	2982	-0.28	-0.594	0.034	10.374	-1.811	0.0791	0.0791	-5.042	0.086	0.645	translocon component PTEX150	PTEX150
942	PF3D7_0424500	Pf3D7_04_v3	1110060	+	2234	-0.273	-0.586	0.04	8.614	-1.777	0.0847	0.0847	-4.99	-0.1	0.581	serine/threonine protein kinase, FIKK family	FIKK4.1
3166	PF3D7_1105600	Pf3D7_11_v3	241184	-	2334	-0.326	-0.724	0.072	8.859	-1.664	0.105	0.105	-5.189	-0.106	0.656	translocon component PTEX88	PTEX88
3263	PF3D7_1115200	Pf3D7_11_v3	576773	+	3504	0.318	-0.092	0.729	7.563	1.577	0.124	0.124	-5.245	0.211	0.387	histone-lysine N-methyltransferase SET7	SET7
2709	PF3D7_1001900	Pf3D7_10_v3	99379	-	983	-0.412	-0.961	0.137	7.678	-1.526	0.136	0.136	-5.299	0.277	0.365	Plasmodium exported protein (hyp16), unknown function	PfJ23
2281	PF3D7_0831700	Pf3D7_08_v3	1365467	-	2040	-0.399	-0.947	0.149	13.027	-1.487	0.147	0.147	-5.669	0.202	0.548	heat shock protein 70	HSP70-x
3896	PF3D7_1226900	Pf3D7_12_v3	1088536	-	1488	0.432	-0.192	1.056	0.722	1.407	0.169	0.169	-4.872	-0.049	0.893	conserved Plasmodium protein, unknown function	PV2
346	PF3D7_0214100	Pf3D7_02_v3	568529	-	4787	-0.196	-0.486	0.095	10.009	-1.372	0.179	0.179	-5.674	0.105	0.531	protein transport protein SEC31	SEC31
181	PF3D7_0113900	Pf3D7_01_v3	537109	-	917	-0.312	-0.802	0.178	5.574	-1.296	0.204	0.204	-5.41	-0.223	0.426	Plasmodium exported protein (hyp8), unknown function	GEXP10
3404	PF3D7_1129100	Pf3D7_11_v3	1125952	+	1359	-0.194	-0.503	0.114	9.846	-1.28	0.209	0.209	-5.782	0.238	0.179	parasitophorous vacuolar protein 1	PV1
1598	PF3D7_0629700	Pf3D7_06_v3	1221941	+	20982	0.183	-0.114	0.479	8.901	1.254	0.219	0.219	-5.75	0.451	0.00569	SET domain protein, putative	SET1
3280	PF3D7_1116800	Pf3D7_11_v3	636094	-	3418	-0.198	-0.521	0.125	10.214	-1.249	0.22	0.22	-5.846	0.029	0.879	heat shock protein 101	HSP101
1942	PF3D7_0731100	Pf3D7_07_v3	1338959	+	2832	-0.215	-0.567	0.137	11.236	-1.243	0.223	0.223	-5.896	0.143	0.468	EMP1-trafficking protein	PTP2
5444	PF3D7_1451400	Pf3D7_14_v3	2108874	+	3915	-0.223	-0.61	0.165	5.105	-1.169	0.251	0.251	-5.522	-0.307	0.178	transcriptional regulatory protein sir2b	Sir2B
3837	PF3D7_1221000	Pf3D7_12_v3	836912	-	6990	0.514	-0.466	1.493	0.315	1.066	0.294	0.294	-5.238	-0.097	0.861	histone-lysine N-methyltransferase, H3 lysine-4 specific	SET10
3610	PF3D7_1149000	Pf3D7_11_v3	1950210	+	18517	0.411	-0.406	1.228	5.625	1.026	0.313	0.313	-5.757	0.12	0.789	antigen 332, DBL-like protein	Pf332
223	PF3D7_0202200	Pf3D7_02_v3	112547	-	1136	-0.156	-0.502	0.19	9.411	-0.919	0.365	0.365	-6.13	0.366	0.0416	EMP1-trafficking protein	PTP1
2242	PF3D7_0827800	Pf3D7_08_v3	1198858	+	7200	-0.174	-0.609	0.261	8.691	-0.813	0.422	0.422	-6.197	-0.134	0.611	SET domain protein, putative	SET3
4198	PF3D7_1301700	Pf3D7_13_v3	99548	+	974	-0.147	-0.524	0.231	10.954	-0.79	0.435	0.435	-6.346	0.147	0.509	Plasmodium exported protein (hyp8), unknown function	GEXP07, VCAP1
2670	PF3D7_0935900	Pf3D7_09_v3	1420483	-	2325	-0.164	-0.588	0.26	14.004	-0.787	0.437	0.437	-6.469	0.292	0.229	ring-exported protein 1	REX1
2676	PF3D7_0936500	Pf3D7_09_v3	1443854	-	994	-0.422	-1.547	0.704	1.497	-0.763	0.451	0.451	-5.521	-0.455	0.463	virulence-associated protein 1	VAP1
4721	PF3D7_1353200	Pf3D7_13_v3	2130531	+	535	-0.14	-0.539	0.258	10.133	-0.717	0.478	0.478	-6.351	0.202	0.381	membrane associated histidine-rich protein	MAHRP2
5643	PF3D7_1471100	Pf3D7_14_v3	2905163	-	1403	-0.11	-0.43	0.21	8.57	-0.7	0.489	0.489	-6.266	0.062	0.741	exported protein 2	EXP2
221	PF3D7_0202000	Pf3D7_02_v3	103385	-	2412	-0.287	-1.151	0.577	12.919	-0.68	0.502	0.502	-6.51	0.235	0.658	knob-associated histidine-rich protein	KAHRP
2945	PF3D7_1024800	Pf3D7_10_v3	1034685	+	4395	-0.13	-0.524	0.265	10.923	-0.667	0.509	0.509	-6.429	0.178	0.437	Exported protein 3	EXP3
5427	PF3D7_1449700	Pf3D7_14_v3	2038132	-	3411	-0.191	-0.778	0.395	5.98	-0.663	0.512	0.512	-6.065	-0.183	0.588	exosome complex exonuclease RRP6	RRP6
4639	PF3D7_1345100	Pf3D7_13_v3	1809736	-	786	0.153	-0.327	0.633	5.432	0.649	0.521	0.521	-6.008	0.374	0.16	thioredoxin 2	TRX2
3090	PF3D7_1039100	Pf3D7_10_v3	1574060	+	1889	-0.404	-1.687	0.879	-0.205	-0.641	0.526	0.526	-5.468	-0.334	0.632	DnaJ protein, putative, pseudogene
4720	PF3D7_1353100	Pf3D7_13_v3	2124272	-	999	0.139	-0.334	0.612	9.332	0.597	0.555	0.555	-6.388	0.588	0.0298	Plasmodium exported protein, unknown function	NA
2711	PF3D7_1002100	Pf3D7_10_v3	106653	-	2010	0.093	-0.24	0.426	10.491	0.567	0.574	0.574	-6.455	0.502	0.00457	EMP1-trafficking protein	PTP5
2407	PF3D7_0910000	Pf3D7_09_v3	452399	-	3345	0.14	-0.385	0.664	3.979	0.541	0.592	0.592	-5.905	-0.056	0.836	SET domain protein, putative	SET4
1940	PF3D7_0730900	Pf3D7_07_v3	1325375	+	6439	-0.176	-0.883	0.531	9.134	-0.508	0.615	0.615	-6.43	-0.029	0.945	EMP1-trafficking protein	PTP4
1039	PF3D7_0508100	Pf3D7_05_v3	331680	+	5025	-0.172	-0.863	0.52	1.282	-0.504	0.617	0.617	-5.678	0.044	0.904	SET domain protein, putative	SET9
5133	PF3D7_1420700	Pf3D7_14_v3	860011	+	3070	-0.08	-0.412	0.253	11.336	-0.486	0.63	0.63	-6.557	0.211	0.272	surface protein P113	P113
3188	PF3D7_1107800	Pf3D7_11_v3	329867	-	5735	0.141	-0.493	0.775	7.925	0.453	0.654	0.654	-6.4	0.238	0.533	transcription factor with AP2 domain(s)	ApiAP2
971	PF3D7_0501200	Pf3D7_05_v3	64065	+	1425	0.14	-0.531	0.811	6.231	0.424	0.674	0.674	-6.256	0.38	0.334	parasite-infected erythrocyte surface protein	PIESP2
943	PF3D7_0424600	Pf3D7_04_v3	1113345	-	1142	0.065	-0.296	0.427	9.094	0.367	0.716	0.716	-6.467	0.511	0.00956	Plasmodium exported protein (PHISTb), unknown function
735	PF3D7_0403900	Pf3D7_04_v3	219087	+	3752	0.157	-0.904	1.219	-1.072	0.301	0.765	0.765	-5.551	0.109	0.854	SET domain protein, putative	SET8
972	PF3D7_0501300	Pf3D7_05_v3	68930	+	1184	-0.058	-0.453	0.338	12.251	-0.297	0.768	0.768	-6.679	0.456	0.0379	skeleton-binding protein 1	SBP1
3769	PF3D7_1214200	Pf3D7_12_v3	607379	-	628	0.096	-0.583	0.775	2.286	0.289	0.775	0.775	-5.822	0.29	0.447	histone-lysine N-methyltransferase, putative	SET5
2197	PF3D7_0823300	Pf3D7_08_v3	1028752	+	4763	-0.043	-0.439	0.353	8.256	-0.222	0.825	0.825	-6.469	0.183	0.424	histone acetyltransferase GCN5	GCN5
4407	PF3D7_1322100	Pf3D7_13_v3	920971	+	8479	0.039	-0.321	0.4	9.009	0.223	0.825	0.825	-6.501	0.231	0.252	histone-lysine N-methyltransferase SET2	SET2
968	PF3D7_0501000	Pf3D7_05_v3	55841	+	1032	-0.039	-0.427	0.349	8.043	-0.204	0.839	0.839	-6.471	-0.02	0.931	Plasmodium exported protein, unknown function	NA
1334	PF3D7_0604100	Pf3D7_06_v3	171301	-	5940	-0.089	-1.128	0.95	-1.129	-0.174	0.863	0.863	-5.589	0.102	0.859	transcription factor with AP2 domain(s)	SIP2
4201	PF3D7_1302000	Pf3D7_13_v3	112792	-	1024	-0.02	-0.256	0.216	8.832	-0.169	0.867	0.867	-6.511	0.219	0.0996	EMP1-trafficking protein	PTP6
1653	PF3D7_0702400	Pf3D7_07_v3	101694	+	592	0.046	-0.558	0.649	7.444	0.154	0.879	0.879	-6.436	0.56	0.116	small exported membrane protein 1	SEMP1
5717	PF3D7_1478600	Pf3D7_14_v3	3232639	+	3897	-0.001	-1.071	1.069	6.182	-0.002	0.999	0.999	-6.357	0.086	0.894	EMP1-trafficking protein	PTP3
