# Supplementary material for: Gene expression profiling of malaria parasites reveals common virulence gene expression in adult first-time infected patients and severe cases
Source: bioRxiv preprint, doi:10.1101/2020.11.13.381137, version 3 (2021-03-23)
Supplement: Table S5 [file 381137_file22.xlsx]

## Sheet: all genes
	GeneID	Chr	Start	Strand	Length	logFC	CI.L	CI.R	AveExpr	t	P.Value	adj.P.Val	B	[Product Description]	[Gene Name or Symbol]
156	PF3D7_0111300	Pf3D7_01_v3	431539	-	3504	2.506	1.427	3.584	-0.835	4.724	4.07e-05	4.07e-05	1.509	replication factor c protein, putative	NA
1002	PF3D7_0504400	Pf3D7_05_v3	172150	+	2268	2.468	1.373	3.562	-1.67	4.586	6.1e-05	6.1e-05	1.029	ATP-dependent helicase, putative	NA
3156	PF3D7_1104700	Pf3D7_11_v3	204593	-	1202	1.487	0.805	2.17	3.149	4.432	9.57e-05	9.57e-05	1.291	DNA-directed RNA polymerase III subunit RPC8, putative	RPC25
3157	PF3D7_1104700	Pf3D7_11_v3	204593	-	1202	1.487	0.805	2.17	3.149	4.432	9.57e-05	9.57e-05	1.291	DNA-directed RNA polymerase III subunit RPC8, putative	RPC25
1438	PF3D7_0614200	Pf3D7_06_v3	593172	-	2733	-1.191	-1.738	-0.643	4.459	-4.424	9.77e-05	9.77e-05	1.287	cytosolic Fe-S cluster assembly factor NAR1, putative	NAR1
924	PF3D7_0422700	Pf3D7_04_v3	1040470	+	1173	-0.834	-1.217	-0.45	6.546	-4.419	9.94e-05	9.94e-05	1.324	eukaryotic initiation factor 4A-III, putative	EIF4A3
3780	PF3D7_1215300	Pf3D7_12_v3	629009	-	659	1.844	0.966	2.722	1.82	4.273	0.000152	0.000152	0.817	10 kDa chaperonin	CPN10
2278	PF3D7_0831400	Pf3D7_08_v3	1344405	-	1083	1.443	0.753	2.133	4.737	4.254	0.00016	0.00016	0.895	Plasmodium exported protein, unknown function	NA
3427	PF3D7_1131200	Pf3D7_11_v3	1199253	+	2553	2.427	1.257	3.596	1.187	4.223	0.00018	0.00018	0.652	conserved Plasmodium protein, unknown function	NA
3329	PF3D7_1121600	Pf3D7_11_v3	815386	-	937	0.61	0.316	0.904	9.981	4.214	0.00018	0.00018	0.68	exported protein 1	EXP1
4914	PF3D7_1373100	Pf3D7_13_v3	2871860	-	1229	2.466	1.259	3.673	-2.984	4.154	0.000214	0.000214	-0.051	rifin	RIF
5619	PF3D7_1468700	Pf3D7_14_v3	2825370	+	1549	0.552	0.281	0.823	11.756	4.148	0.000217	0.000217	0.439	eukaryotic initiation factor 4A	eIF4A
2334	PF3D7_0903200	Pf3D7_09_v3	133762	-	1826	1.328	0.676	1.979	4.998	4.146	0.000219	0.000219	0.614	ras-related protein RAB7	RAB7
4552	PF3D7_1336400	Pf3D7_13_v3	1477961	-	2064	0.922	0.469	1.374	4.682	4.142	0.000221	0.000221	0.603	RanBPM and CLTH-like protein, putative	NA
3881	PF3D7_1225400	Pf3D7_12_v3	1031825	-	741	-0.953	-1.424	-0.481	5.422	-4.107	0.000245	0.000245	0.514	conserved Plasmodium protein, unknown function	NA
2660	PF3D7_0934900	Pf3D7_09_v3	1364256	-	1744	0.963	0.484	1.441	5.318	4.09	0.000257	0.000257	0.467	conserved Plasmodium protein, unknown function	NA
3708	PF3D7_1208300	Pf3D7_12_v3	388545	+	603	1.585	0.793	2.376	1.912	4.072	0.000271	0.000271	0.318	mitochondrial ACP precursor, putative	NA
2146	PF3D7_0818200	Pf3D7_08_v3	830006	+	1449	0.61	0.301	0.918	10.478	4.023	0.000311	0.000311	0.145	14-3-3 protein	14-3-3I
1938	PF3D7_0730800	Pf3D7_07_v3	1321306	+	1062	0.558	0.274	0.841	10.67	3.995	0.000337	0.000337	0.063	Plasmodium exported protein, unknown function, unspecified product	NA
1939	PF3D7_0730800	Pf3D7_07_v3	1321306	+	1062	0.558	0.274	0.841	10.67	3.995	0.000337	0.000337	0.063	Plasmodium exported protein, unknown function, unspecified product	NA
1686	PF3D7_0705700	Pf3D7_07_v3	285472	-	695	0.663	0.325	1.001	8.234	3.988	0.000344	0.000344	0.136	40S ribosomal protein S29, putative	NA
3158	PF3D7_1104800	Pf3D7_11_v3	207440	+	2293	1.238	0.605	1.87	2.901	3.98	0.000352	0.000352	0.162	metabolite/drug transporter, putative	NA
2316	PF3D7_0901400	Pf3D7_09_v3	70521	+	1218	5.348	2.63	8.066	-2.065	4.025	0.000377	0.000377	-0.254	rifin	RIF
5286	PF3D7_1435700	Pf3D7_14_v3	1445085	-	4407	1.708	0.83	2.586	2.651	3.955	0.000378	0.000378	0.094	ataxin-2 like protein, putative	NA
5287	PF3D7_1435700	Pf3D7_14_v3	1445085	-	4407	1.708	0.83	2.586	2.651	3.955	0.000378	0.000378	0.094	ataxin-2 like protein, putative	NA
612	PF3D7_0316600	Pf3D7_03_v3	669302	-	1572	1.711	0.829	2.593	8.693	3.964	0.000425	0.000425	-0.066	formate-nitrite transporter	FNT
1615	PF3D7_0631400	Pf3D7_06_v3	1318327	-	790	2.132	0.991	3.272	-1.011	3.8	0.000586	0.000586	-0.525	Pfmc-2TM Maurer's cleft two transmembrane protein	MC-2TM
3823	PF3D7_1219500	Pf3D7_12_v3	784018	+	813	-3.766	-5.774	-1.759	-0.979	-3.827	0.000592	0.000592	-0.566	erythrocyte membrane protein 1 (PfEMP1), exon 2, pseudogene	VAR
5291	PF3D7_1436100	Pf3D7_14_v3	1461388	+	6203	-1.005	-1.549	-0.462	5.993	-3.761	0.000652	0.000652	-0.372	conserved Plasmodium membrane protein, unknown function	NA
1584	PF3D7_0628300	Pf3D7_06_v3	1170813	-	2884	1.549	0.715	2.384	6.948	3.788	0.000653	0.000653	-0.407	choline/ethanolaminephosphotransferase, putative	CEPT
5125	PF3D7_1419900	Pf3D7_14_v3	825612	-	1719	-0.829	-1.277	-0.38	5.763	-3.758	0.000657	0.000657	-0.376	YTH domain-containing protein, putative	NA
187	PF3D7_0114500	Pf3D7_01_v3	558201	-	508	3.155	1.438	4.873	0.561	3.75	0.000738	0.000738	-0.558	Plasmodium exported protein (hyp10), unknown function	NA
309	PF3D7_0210400	Pf3D7_02_v3	425689	+	809	2.175	0.981	3.369	-1.585	3.706	0.000762	0.000762	-0.835	50S ribosomal protein L33, putative	NA
1966	PF3D7_0800500	Pf3D7_08_v3	56352	-	1352	1.805	0.808	2.802	0.538	3.681	0.000815	0.000815	-0.666	rifin	RIF
599	PF3D7_0315400	Pf3D7_03_v3	630611	-	771	1.737	0.769	2.706	0.185	3.647	0.000897	0.000897	-0.764	conserved Plasmodium protein, unknown function	NA
3173	PF3D7_1106300	Pf3D7_11_v3	263604	-	2967	1.623	0.715	2.531	3.037	3.636	0.000925	0.000925	-0.662	exonuclease, putative	NA
4159	PF3D7_1253000	Pf3D7_12_v3	2168181	+	1579	1.801	0.796	2.807	4.871	3.654	0.000942	0.000942	-0.683	gametocyte erythrocyte cytosolic protein	GECO
345	PF3D7_0214000	Pf3D7_02_v3	566121	+	1774	0.546	0.24	0.852	8.739	3.626	0.000949	0.000949	-0.829	T-complex protein 1 subunit theta	CCT8
4616	PF3D7_1342800	Pf3D7_13_v3	1679693	+	1752	0.955	0.417	1.492	5.869	3.613	0.000986	0.000986	-0.758	phosphoenolpyruvate carboxykinase	PEPCK
115	PF3D7_0107200	Pf3D7_01_v3	297362	+	2036	2.181	0.94	3.423	-1.999	3.573	0.0011	0.0011	-1.078	carbon catabolite repressor protein 4, putative	NA
1756	PF3D7_0712500	Pf3D7_07_v3	562906	-	1255	2.533	1.08	3.986	-2.451	3.546	0.00119	0.00119	-1.184	rifin, pseudogene	RIF
3566	PF3D7_1144600	Pf3D7_11_v3	1770949	+	954	-0.635	-1.001	-0.269	6.832	-3.532	0.00123	0.00123	-0.98	transcription initiation factor IIF subunit beta, putative	TFG2
1882	PF3D7_0725200	Pf3D7_07_v3	1070980	+	758	0.531	0.224	0.838	6.645	3.514	0.00129	0.00129	-1.033	mago nashi protein homologue, putative	NA
4170	PF3D7_1254100	Pf3D7_12_v3	2204724	+	991	1.576	0.664	2.489	-3.616	3.513	0.0013	0.0013	-1.357	stevor	NA
837	PF3D7_0414100	Pf3D7_04_v3	634029	-	4877	2.473	1.033	3.912	-2.003	3.493	0.00137	0.00137	-1.279	conserved Plasmodium membrane protein, unknown function	NA
2279	PF3D7_0831500	Pf3D7_08_v3	1353456	+	1214	0.566	0.236	0.895	9.554	3.492	0.00138	0.00138	-1.212	Plasmodium exported protein (PHIST), unknown function	NA
2497	PF3D7_0919000	Pf3D7_09_v3	781368	-	1308	0.444	0.185	0.703	10.061	3.488	0.00139	0.00139	-1.234	nucleosome assembly protein	NAPS
3618	PF3D7_1149700	Pf3D7_11_v3	2004754	+	258	3.457	1.438	5.477	-1.677	3.492	0.00147	0.00147	-1.236	Plasmodium exported protein (PHISTa), unknown function	NA
3398	PF3D7_1128400	Pf3D7_11_v3	1104216	-	2290	0.91	0.376	1.445	5.484	3.462	0.00149	0.00149	-1.114	geranylgeranyl pyrophosphate synthase, putative	GGPPS
148	PF3D7_0110400	Pf3D7_01_v3	393875	-	961	-0.802	-1.274	-0.33	6.574	-3.458	0.00151	0.00151	-1.153	DNA-directed RNA polymerase II subunit RPB9, putative	RPB9
2624	PF3D7_0931300	Pf3D7_09_v3	1261027	+	918	-2.069	-3.282	-0.855	2.808	-3.475	0.00152	0.00152	-1.079	asparagine-rich antigen, putative	NA
4811	PF3D7_1362300	Pf3D7_13_v3	2493143	+	570	-0.716	-1.139	-0.293	4.765	-3.44	0.00158	0.00158	-1.131	conserved protein, unknown function	NA
1288	PF3D7_0532600	Pf3D7_05_v3	1318531	-	699	2.975	1.206	4.744	0.925	3.433	0.00175	0.00175	-1.243	Plasmodium exported protein, unknown function	NA
1153	PF3D7_0519400	Pf3D7_05_v3	798036	-	740	0.564	0.226	0.903	9.811	3.387	0.00183	0.00183	-1.478	40S ribosomal protein S24	RPS24
3592	PF3D7_1147300	Pf3D7_11_v3	1883775	+	4086	2.197	0.873	3.522	1.255	3.38	0.00193	0.00193	-1.303	conserved Plasmodium protein, unknown function	NA
5693	PF3D7_1476200	Pf3D7_14_v3	3133951	+	1701	1.45	0.576	2.325	6.368	3.382	0.00196	0.00196	-1.4	Plasmodium exported protein (PHISTb), unknown function	NA
3283	PF3D7_1117100	Pf3D7_11_v3	652579	+	1398	1.645	0.648	2.642	-1.754	3.355	0.00199	0.00199	-1.521	deubiquinating/deneddylating enzyme	UCH54
5569	PF3D7_1463700	Pf3D7_14_v3	2581543	+	981	-0.712	-1.143	-0.28	4.677	-3.355	0.00199	0.00199	-1.33	cyclin homologue	CYC1
3865	PF3D7_1223800	Pf3D7_12_v3	971268	+	927	-1.165	-1.872	-0.458	5.531	-3.35	0.00202	0.00202	-1.361	citrate/oxoglutarate carrier protein, putative	YHM2
2538	PF3D7_0923000	Pf3D7_09_v3	939580	-	1008	-0.606	-0.975	-0.237	6.224	-3.34	0.00207	0.00207	-1.424	DNA-directed RNA polymerase II subunit RPB3, putative	RPB3
2786	PF3D7_1009500	Pf3D7_10_v3	383044	-	1750	1.183	0.461	1.905	1.631	3.331	0.00212	0.00212	-1.389	metalloprotease, putative	NA
2268	PF3D7_0830400	Pf3D7_08_v3	1294022	+	701	0.583	0.227	0.938	8.688	3.332	0.00212	0.00212	-1.57	conserved Plasmodium protein, unknown function	NA
3114	PF3D7_1100400	Pf3D7_11_v3	48112	+	1196	2.185	0.85	3.52	-2.556	3.329	0.00214	0.00214	-1.638	rifin	RIF
4228	PF3D7_1304500	Pf3D7_13_v3	235800	-	636	1.254	0.486	2.021	0.471	3.323	0.00217	0.00217	-1.464	small heat shock protein, putative	NA
4651	PF3D7_1346300	Pf3D7_13_v3	1849528	+	990	0.412	0.159	0.665	10.546	3.318	0.0022	0.0022	-1.689	DNA/RNA-binding protein Alba 2	ALBA2
1044	PF3D7_0508600	Pf3D7_05_v3	356222	+	789	-0.829	-1.337	-0.32	5.961	-3.314	0.00222	0.00222	-1.466	conserved Plasmodium protein, unknown function	NA
3395	PF3D7_1128100	Pf3D7_11_v3	1094909	-	1023	0.599	0.231	0.967	6.2	3.31	0.00225	0.00225	-1.514	prefoldin subunit 5, putative	NA
3214	PF3D7_1110400	Pf3D7_11_v3	414797	+	4760	0.505	0.195	0.816	11.296	3.307	0.00226	0.00226	-1.749	asparagine-rich antigen	NA
4780	PF3D7_1359200	Pf3D7_13_v3	2350437	-	2384	1.08	0.41	1.75	3.022	3.279	0.00245	0.00245	-1.492	high mobility group protein B4, putative	HMGB4
4251	PF3D7_1306800	Pf3D7_13_v3	320815	-	1203	-0.633	-1.025	-0.24	5.814	-3.275	0.00247	0.00247	-1.557	RED-like protein, putative	NA
4455	PF3D7_1326900	Pf3D7_13_v3	1129363	-	3684	-1.466	-2.379	-0.554	4.128	-3.268	0.00252	0.00252	-1.525	conserved Plasmodium membrane protein, unknown function	NA
2876	PF3D7_1018000	Pf3D7_10_v3	718454	+	1683	-0.853	-1.385	-0.321	4.347	-3.259	0.00258	0.00258	-1.547	tRNA pseudouridine synthase, putative	NA
173	PF3D7_0113000	Pf3D7_01_v3	487892	-	2236	0.966	0.364	1.568	13.231	3.272	0.00263	0.00263	-1.936	glutamic acid-rich protein	GARP
1525	PF3D7_0622600	Pf3D7_06_v3	914743	+	687	1.512	0.564	2.46	-1.231	3.243	0.00269	0.00269	-1.704	cytochrome b-c1 complex subunit 9, putative	QCR9
4413	PF3D7_1322700	Pf3D7_13_v3	958219	-	957	-1.543	-2.51	-0.575	-3.08	-3.242	0.0027	0.0027	-1.826	conserved Plasmodium protein, unknown function	NA
2155	PF3D7_0819100	Pf3D7_08_v3	869562	+	1013	-0.62	-1.009	-0.231	6.18	-3.239	0.00271	0.00271	-1.658	BRIX domain, putative	NA
1321	PF3D7_0602800	Pf3D7_06_v3	116084	+	1941	-0.688	-1.121	-0.255	5.397	-3.234	0.00276	0.00276	-1.647	JmjC domain containing protein	JmjC2
1996	PF3D7_0803300	Pf3D7_08_v3	208451	+	1841	1.724	0.638	2.81	-1.988	3.228	0.0028	0.0028	-1.774	mitogen-activated protein kinase organizer 1, putative	MORG1
4207	PF3D7_1302600	Pf3D7_13_v3	142860	-	1236	-0.606	-0.988	-0.224	6.341	-3.227	0.0028	0.0028	-1.697	deoxyhypusine hydroxylase	DOHH
3544	PF3D7_1142400	Pf3D7_11_v3	1702089	-	1554	-0.514	-0.842	-0.187	7.136	-3.197	0.00304	0.00304	-1.808	coproporphyrinogen-III oxidase	CPO
3522	PF3D7_1140200	Pf3D7_11_v3	1601257	-	1822	1.082	0.393	1.77	5.612	3.195	0.00305	0.00305	-1.774	conserved Plasmodium protein, unknown function	NA
3534	PF3D7_1141400	Pf3D7_11_v3	1663621	+	1630	1.946	0.707	3.186	-1.189	3.194	0.00306	0.00306	-1.785	phosphatidylinositol N-acetylglucosaminyltransferase subunit H, putative	PIGH
172	PF3D7_0112900	Pf3D7_01_v3	486500	+	687	1.381	0.502	2.261	4.368	3.196	0.00309	0.00309	-1.724	Plasmodium exported protein, unknown function	NA
2028	PF3D7_0806500	Pf3D7_08_v3	345427	-	2028	-0.693	-1.136	-0.251	6.989	-3.188	0.00311	0.00311	-1.819	DnaJ protein, putative	NA
2735	PF3D7_1004400	Pf3D7_10_v3	207000	-	2643	0.983	0.355	1.611	5.594	3.183	0.00315	0.00315	-1.803	RNA-binding protein, putative	NA
2781	PF3D7_1009000	Pf3D7_10_v3	371293	+	825	-0.507	-0.833	-0.181	6.268	-3.16	0.00335	0.00335	-1.851	diphthine methyl ester synthase, putative	DPH5
1524	PF3D7_0622500	Pf3D7_06_v3	912406	-	1305	-0.83	-1.365	-0.295	4.646	-3.155	0.00339	0.00339	-1.792	RNA methyltransferase, putative	NA
3776	PF3D7_1214900	Pf3D7_12_v3	618764	+	1348	1.204	0.428	1.98	1.064	3.155	0.0034	0.0034	-1.785	conserved Plasmodium membrane protein, unknown function	NA
1841	PF3D7_0721100	Pf3D7_07_v3	916434	+	735	1.147	0.406	1.888	3.681	3.147	0.00347	0.00347	-1.815	conserved Plasmodium protein, unknown function	NA
5467	PF3D7_1453700	Pf3D7_14_v3	2207027	+	1294	0.531	0.187	0.876	9.658	3.135	0.00358	0.00358	-2.099	co-chaperone p23	P23
747	PF3D7_0405100	Pf3D7_04_v3	272255	-	4570	-0.633	-1.044	-0.222	7.546	-3.13	0.00362	0.00362	-1.989	protein transport protein Sec24B	SEC24B
2485	PF3D7_0917800	Pf3D7_09_v3	734629	+	1314	-0.989	-1.632	-0.345	2.719	-3.126	0.00366	0.00366	-1.831	conserved Plasmodium protein, unknown function	NA
3227	PF3D7_1111700	Pf3D7_11_v3	452459	-	2403	-0.703	-1.161	-0.245	5.426	-3.122	0.0037	0.0037	-1.9	conserved Plasmodium protein, unknown function	NA
3613	PF3D7_1149200	Pf3D7_11_v3	1976407	+	3398	0.656	0.228	1.084	9.847	3.119	0.00373	0.00373	-2.149	ring-infected erythrocyte surface antigen	NA
2055	PF3D7_0809200	Pf3D7_08_v3	467943	-	3951	-0.691	-1.142	-0.24	6.128	-3.117	0.00375	0.00375	-1.942	asparagine-rich antigen Pfa55-14	pfa55-14
1176	PF3D7_0521700	Pf3D7_05_v3	882376	+	2526	-0.76	-1.257	-0.264	4.78	-3.116	0.00376	0.00376	-1.885	ATP-dependent RNA helicase DDX1, putative	DDX1
1881	PF3D7_0725100	Pf3D7_07_v3	1065252	+	4989	-0.664	-1.098	-0.23	6.798	-3.11	0.00382	0.00382	-2.002	conserved Plasmodium membrane protein, unknown function	NA
716	PF3D7_0402000	Pf3D7_04_v3	114601	-	1458	1.466	0.506	2.425	3.656	3.109	0.00388	0.00388	-1.907	Plasmodium exported protein (PHISTa), unknown function	NA
775	PF3D7_0408000	Pf3D7_04_v3	394065	-	516	-1.217	-2.016	-0.418	1.586	-3.099	0.00393	0.00393	-1.908	conserved Plasmodium protein, unknown function	NA
3580	PF3D7_1146000	Pf3D7_11_v3	1821032	-	1938	-0.654	-1.085	-0.223	7.323	-3.087	0.00406	0.00406	-2.085	ribosome assembly protein 4, putative	RSA4
1950	PF3D7_0731900	Pf3D7_07_v3	1382410	+	1115	-1.495	-2.481	-0.509	0.096	-3.084	0.00408	0.00408	-1.959	rifin, pseudogene	RIF
3174	PF3D7_1106400	Pf3D7_11_v3	267547	+	351	1.838	0.626	3.05	-2.157	3.083	0.00409	0.00409	-2.06	conserved Plasmodium protein, unknown function	NA
1649	PF3D7_0702000	Pf3D7_07_v3	84797	+	878	1.142	0.39	1.894	8.349	3.098	0.00411	0.00411	-2.166	Plasmodium exported protein (hyp12), unknown function	NA
3247	PF3D7_1113700	Pf3D7_11_v3	529493	+	1071	-0.548	-0.909	-0.186	5.774	-3.079	0.00414	0.00414	-2.011	glyoxalase I	GloI
2710	PF3D7_1002000	Pf3D7_10_v3	103118	-	1566	0.865	0.293	1.438	7.153	3.073	0.00421	0.00421	-2.133	Plasmodium exported protein (hyp2), unknown function	NA
4218	PF3D7_1303600	Pf3D7_13_v3	178783	+	571	-0.943	-1.57	-0.316	2.427	-3.061	0.00434	0.00434	-1.972	conserved Plasmodium protein, unknown function	NA
380	PF3D7_0217400	Pf3D7_02_v3	717692	+	590	0.793	0.264	1.322	3.012	3.049	0.00448	0.00448	-1.999	conserved Plasmodium protein, unknown function	NA
4070	PF3D7_1244200	Pf3D7_12_v3	1852844	-	2838	-0.654	-1.091	-0.217	6.824	-3.044	0.00453	0.00453	-2.153	RNA polymerase II transcription factor B subunit 2, putative	TFB2
2711	PF3D7_1002100	Pf3D7_10_v3	106653	-	2010	0.502	0.166	0.838	10.491	3.041	0.00457	0.00457	-2.36	EMP1-trafficking protein	PTP5
3396	PF3D7_1128200	Pf3D7_11_v3	1097117	+	411	-0.645	-1.078	-0.213	6.315	-3.036	0.00463	0.00463	-2.144	multiprotein-bridging factor 1, putative	MBF1
5284	PF3D7_1435500	Pf3D7_14_v3	1436280	+	765	-0.581	-0.97	-0.191	6.047	-3.032	0.00468	0.00468	-2.139	conserved Plasmodium protein, unknown function	NA
2992	PF3D7_1029400	Pf3D7_10_v3	1200894	-	1506	-0.57	-0.953	-0.187	5.896	-3.03	0.00471	0.00471	-2.136	LEM3/CDC50 family protein, putative	NA
3375	PF3D7_1126200	Pf3D7_11_v3	1023790	-	707	0.441	0.145	0.737	9.393	3.028	0.00472	0.00472	-2.328	40S ribosomal protein S18, putative	NA
1801	PF3D7_0717000	Pf3D7_07_v3	738578	+	2632	1.658	0.543	2.773	-1.056	3.025	0.00476	0.00476	-2.124	conserved Plasmodium membrane protein, unknown function	NA
933	PF3D7_0423600	Pf3D7_04_v3	1061790	-	4839	-0.471	-0.789	-0.154	8.74	-3.019	0.00483	0.00483	-2.316	conserved Plasmodium protein, unknown function	NA
2879	PF3D7_1018300	Pf3D7_10_v3	729809	-	3048	-0.545	-0.912	-0.178	8.067	-3.017	0.00486	0.00486	-2.285	conserved Plasmodium protein, unknown function	NA
5277	PF3D7_1434800	Pf3D7_14_v3	1410139	+	759	0.932	0.301	1.562	3.891	3.006	0.00501	0.00501	-2.141	mitochondrial acidic protein MAM33, putative	NA
3039	PF3D7_1034000	Pf3D7_10_v3	1359318	-	1992	-0.618	-1.037	-0.199	5.975	-3.003	0.00504	0.00504	-2.195	Sec1 family protein, putative	NA
3306	PF3D7_1119300	Pf3D7_11_v3	724855	-	885	-0.541	-0.907	-0.174	7.408	-3.001	0.00507	0.00507	-2.287	splicing factor U2AF small subunit, putative	U2AF1
1127	PF3D7_0516800	Pf3D7_05_v3	700120	-	7137	-0.847	-1.423	-0.272	3.931	-2.994	0.00515	0.00515	-2.16	transcription factor with AP2 domain(s)	ApiAP2
1648	PF3D7_0701900	Pf3D7_07_v3	79890	-	3054	2.973	0.968	4.978	6.8	3.044	0.00519	0.00519	-2.259	Plasmodium exported protein, unknown function	NA
1650	PF3D7_0702100	Pf3D7_07_v3	88685	+	2202	1.785	0.576	2.995	6.691	3.021	0.00527	0.00527	-2.291	Plasmodium exported protein (PHISTb), unknown function, pseudogene	NA
5507	PF3D7_1457600	Pf3D7_14_v3	2363578	+	1793	-0.497	-0.837	-0.158	5.972	-2.983	0.00531	0.00531	-2.244	conserved Plasmodium protein, unknown function	NA
770	PF3D7_0407500	Pf3D7_04_v3	369885	+	1386	-0.7	-1.179	-0.222	3.847	-2.978	0.00537	0.00537	-2.156	mitochondrial carrier protein, putative	NA
4917	PF3D7_1373400	Pf3D7_13_v3	2881591	+	1366	-1.699	-2.86	-0.538	0.878	-2.977	0.00539	0.00539	-2.167	rifin	RIF
4500	PF3D7_1331200	Pf3D7_13_v3	1306654	+	1346	-0.489	-0.824	-0.154	7.54	-2.965	0.00555	0.00555	-2.384	conserved Plasmodium protein, unknown function	NA
1598	PF3D7_0629700	Pf3D7_06_v3	1221941	+	20982	0.451	0.141	0.761	8.901	2.956	0.00569	0.00569	-2.483	SET domain protein, putative	SET1
4368	PF3D7_1318300	Pf3D7_13_v3	753910	+	5523	1.307	0.406	2.209	3.175	2.95	0.00577	0.00577	-2.219	conserved Plasmodium protein, unknown function	NA
3136	PF3D7_1102700	Pf3D7_11_v3	128789	+	276	0.649	0.2	1.098	10.338	2.94	0.00592	0.00592	-2.579	early transcribed membrane protein 11.1	ETRAMP11.1
2831	PF3D7_1013900	Pf3D7_10_v3	545679	-	3225	-0.632	-1.071	-0.193	7.35	-2.928	0.00611	0.00611	-2.447	translation initiation factor eIF-2B subunit delta, putative	NA
2702	PF3D7_1001200	Pf3D7_10_v3	70547	-	273	0.947	0.288	1.606	2.374	2.922	0.0062	0.0062	-2.262	acyl-CoA binding protein, isoform 2, ACBP2	ACBP2
1352	PF3D7_0605900	Pf3D7_06_v3	247640	+	1527	1.247	0.38	2.114	6.522	2.932	0.00626	0.00626	-2.448	long chain polyunsaturated fatty acid elongation enzyme, putative	NA
1398	PF3D7_0610400	Pf3D7_06_v3	444747	+	411	1.384	0.418	2.35	1.845	2.913	0.00635	0.00635	-2.279	histone H3	H3
3933	PF3D7_1230500	Pf3D7_12_v3	1253973	-	1509	-0.538	-0.915	-0.161	6.113	-2.905	0.00648	0.00648	-2.426	WD repeat-containing protein, putative	NA
3324	PF3D7_1121100	Pf3D7_11_v3	794254	-	5308	0.744	0.223	1.266	8.551	2.902	0.00652	0.00652	-2.592	conserved Plasmodium protein, unknown function	NA
2987	PF3D7_1029000	Pf3D7_10_v3	1187503	-	2087	1.865	0.557	3.173	-2.849	2.9	0.00656	0.00656	-2.416	conserved Plasmodium protein, unknown function, pseudogene	NA
3820	PF3D7_1219200	Pf3D7_12_v3	764448	+	704	-3.564	-6.051	-1.077	2.727	-2.937	0.00661	0.00661	-2.292	rifin, pseudogene	RIF
3010	PF3D7_1031200	Pf3D7_10_v3	1257384	+	1095	1.458	0.434	2.481	2.033	2.896	0.00663	0.00663	-2.325	MORN repeat-containing protein 1	MORN1
2667	PF3D7_0935600	Pf3D7_09_v3	1405192	+	1831	0.679	0.201	1.156	11.019	2.89	0.00673	0.00673	-2.753	gametocytogenesis-implicated protein	GIG
5204	PF3D7_1427600	Pf3D7_14_v3	1085603	+	1437	1.089	0.322	1.855	1.446	2.888	0.00677	0.00677	-2.331	CorA-like Mg2+ transporter protein, putative	MIT3
1842	PF3D7_0721200	Pf3D7_07_v3	917958	-	2859	-0.695	-1.185	-0.205	5.224	-2.887	0.00678	0.00678	-2.412	conserved Plasmodium protein, unknown function	NA
4320	PF3D7_1313500	Pf3D7_13_v3	573169	-	5311	-1.263	-2.154	-0.372	-1.628	-2.884	0.00683	0.00683	-2.408	conserved Plasmodium membrane protein, unknown function	NA
1724	PF3D7_0709300	Pf3D7_07_v3	413560	-	8190	-0.671	-1.146	-0.197	6.289	-2.879	0.00691	0.00691	-2.492	Cg2 protein, putative	CG2
5020	PF3D7_1409800	Pf3D7_14_v3	383188	+	1545	1.181	0.345	2.016	0.951	2.875	0.00699	0.00699	-2.357	CUGBP Elav-like family member 2, putative	CELF2
5093	PF3D7_1416800	Pf3D7_14_v3	682778	+	2025	1.101	0.322	1.88	1.587	2.875	0.00699	0.00699	-2.357	lysine--tRNA ligase, putative	NA
2128	PF3D7_0816400	Pf3D7_08_v3	757224	+	984	1.729	0.504	2.954	-2.732	2.871	0.00705	0.00705	-2.465	EF-hand calcium-binding domain-containing protein	NA
5018	PF3D7_1409600	Pf3D7_14_v3	374800	+	2307	-0.704	-1.203	-0.205	5.68	-2.871	0.00707	0.00707	-2.477	conserved Plasmodium protein, unknown function	NA
4847	PF3D7_1365900	Pf3D7_13_v3	2632534	-	727	0.416	0.12	0.713	9.258	2.86	0.00726	0.00726	-2.712	ubiquitin-60S ribosomal protein L40	NA
5667	PF3D7_1473500	Pf3D7_14_v3	2993252	-	2028	-0.526	-0.902	-0.151	6.985	-2.851	0.00742	0.00742	-2.608	conserved Plasmodium protein, unknown function	NA
3669	PF3D7_1204300	Pf3D7_12_v3	205491	-	486	0.603	0.171	1.034	9.281	2.841	0.00762	0.00762	-2.76	eukaryotic translation initiation factor 5A	EIF5A
5614	PF3D7_1468200	Pf3D7_14_v3	2802508	+	681	-0.666	-1.145	-0.187	5.242	-2.829	0.00784	0.00784	-2.554	conserved protein, unknown function	NA
2421	PF3D7_0911400	Pf3D7_09_v3	522221	-	3798	-1.173	-2.017	-0.329	4.423	-2.826	0.00791	0.00791	-2.525	conserved Plasmodium protein, unknown function	NA
3388	PF3D7_1127500	Pf3D7_11_v3	1067197	+	3023	1.132	0.315	1.949	0.2	2.819	0.00804	0.00804	-2.469	protein disulfide-isomerase, putative	NA
5653	PF3D7_1472100	Pf3D7_14_v3	2941600	-	1660	0.493	0.137	0.849	7.545	2.814	0.00814	0.00814	-2.739	protein transport protein YIP1, putative	YIP1
3726	PF3D7_1210000	Pf3D7_12_v3	452595	+	1234	1.279	0.35	2.208	-0.372	2.8	0.00845	0.00845	-2.52	50S ribosomal protein L1, apicoplast, putative	RPL1
1468	PF3D7_0617200	Pf3D7_06_v3	717050	+	1868	0.417	0.113	0.72	10.216	2.794	0.00857	0.00857	-2.914	conserved Plasmodium protein, unknown function	NA
2795	PF3D7_1010400	Pf3D7_10_v3	415404	-	2068	0.69	0.187	1.193	5.831	2.792	0.00861	0.00861	-2.693	conserved Plasmodium protein, unknown function	NA
756	PF3D7_0406000	Pf3D7_04_v3	321019	+	1527	-0.689	-1.191	-0.187	5.738	-2.789	0.00867	0.00867	-2.661	conserved Plasmodium protein, unknown function	NA
1579	PF3D7_0627800	Pf3D7_06_v3	1114544	-	2994	-0.606	-1.048	-0.163	7.946	-2.782	0.00882	0.00882	-2.814	acetyl-CoA synthetase, putative	ACS
603	PF3D7_0315800	Pf3D7_03_v3	641482	-	1098	-0.464	-0.803	-0.125	6.623	-2.781	0.00884	0.00884	-2.744	zinc finger protein, putative	NA
1972	PF3D7_0800900	Pf3D7_08_v3	83128	+	777	1.06	0.284	1.836	5.146	2.779	0.00892	0.00892	-2.689	Plasmodium exported protein (hyp7), unknown function, pseudogene	NA
3958	PF3D7_1233000	Pf3D7_12_v3	1355317	-	2412	-0.919	-1.593	-0.246	2.787	-2.775	0.00898	0.00898	-2.562	elongation factor G	EF-G
979	PF3D7_0502000	Pf3D7_05_v3	97657	+	4239	-0.559	-0.968	-0.149	6.891	-2.773	0.00904	0.00904	-2.774	vacuolar protein sorting-associated protein 11, putative	VPS11
2015	PF3D7_0805200	Pf3D7_08_v3	290902	+	282	1.558	0.415	2.702	2.581	2.774	0.00911	0.00911	-2.585	gamete release protein, putative	GAMER
4040	PF3D7_1241200	Pf3D7_12_v3	1748873	-	7365	-0.578	-1.002	-0.153	6.96	-2.765	0.0092	0.0092	-2.794	conserved Plasmodium protein, unknown function	NA
3791	PF3D7_1216400	Pf3D7_12_v3	653670	+	2766	-0.706	-1.227	-0.186	6.757	-2.759	0.00935	0.00935	-2.79	conserved Plasmodium membrane protein, unknown function	NA
4797	PF3D7_1361000	Pf3D7_13_v3	2445090	-	2175	-0.683	-1.187	-0.179	6.267	-2.757	0.00939	0.00939	-2.768	protein arginine N-methyltransferase 5, putative	PRMT5
1228	PF3D7_0526800	Pf3D7_05_v3	1120704	-	1107	0.587	0.154	1.021	8.066	2.755	0.00944	0.00944	-2.891	conserved Plasmodium protein, unknown function	NA
327	PF3D7_0212200	Pf3D7_02_v3	489904	-	915	0.68	0.178	1.182	4.416	2.754	0.00947	0.00947	-2.675	mitochondrial ribosomal protein L12 precursor, putative	NA
3995	PF3D7_1236700	Pf3D7_12_v3	1529821	-	1527	1.142	0.298	1.986	2.032	2.753	0.00949	0.00949	-2.601	S-adenosyl-methyltransferase, putative	NA
1562	PF3D7_0626200	Pf3D7_06_v3	1058666	-	1257	-0.856	-1.489	-0.223	4.295	-2.75	0.00955	0.00955	-2.66	conserved Plasmodium protein, unknown function	NA
943	PF3D7_0424600	Pf3D7_04_v3	1113345	-	1142	0.511	0.133	0.89	9.094	2.75	0.00956	0.00956	-2.959	Plasmodium exported protein (PHISTb), unknown function	NA
1896	PF3D7_0726700	Pf3D7_07_v3	1143303	-	513	0.904	0.234	1.574	0.141	2.745	0.00968	0.00968	-2.617	conserved Plasmodium protein, unknown function	NA
1203	PF3D7_0524400	Pf3D7_05_v3	1013453	-	1098	-0.524	-0.913	-0.135	7.81	-2.741	0.00978	0.00978	-2.893	ribosome-interacting GTPase 1, putative	RBG1
2068	PF3D7_0810500	Pf3D7_08_v3	534469	-	2151	-0.892	-1.555	-0.23	6.07	-2.74	0.00979	0.00979	-2.786	protein phosphatase PPM7, putative	PPM7
1645	PF3D7_0701600	Pf3D7_07_v3	71049	+	812	2.409	0.623	4.194	-0.679	2.751	0.00981	0.00981	-2.629	Pfmc-2TM Maurer's cleft two transmembrane protein	MC-2TM
398	PF3D7_0219200	Pf3D7_02_v3	772316	+	375	0.503	0.13	0.877	8.276	2.74	0.00981	0.00981	-2.937	40S ribosomal protein S30	NA
2673	PF3D7_0936200	Pf3D7_09_v3	1433332	-	777	1.301	0.334	2.268	4.12	2.739	0.00995	0.00995	-2.719	Plasmodium exported protein (hyp11), unknown function	NA
5562	PF3D7_1463000	Pf3D7_14_v3	2565357	-	927	-0.774	-1.35	-0.198	3.917	-2.732	0.00998	0.00998	-2.684	conserved Plasmodium protein, unknown function	NA
5631	PF3D7_1469900	Pf3D7_14_v3	2866358	+	1826	1.358	0.346	2.369	-0.133	2.729	0.0101	0.0101	-2.653	conserved Plasmodium protein, unknown function	NA
522	PF3D7_0308000	Pf3D7_03_v3	353549	+	1497	1.694	0.426	2.963	-1.045	2.716	0.0104	0.0104	-2.689	DNA polymerase delta small subunit, putative	NA
2273	PF3D7_0830900	Pf3D7_08_v3	1317600	-	742	1.293	0.324	2.262	4.126	2.718	0.0105	0.0105	-2.783	Plasmodium exported protein, unknown function	NA
4759	PF3D7_1357100	Pf3D7_13_v3	2268901	+	1332	0.509	0.126	0.893	11.464	2.704	0.0107	0.0107	-3.174	elongation factor 1-alpha	NA
1459	PF3D7_0616300	Pf3D7_06_v3	676888	-	684	-0.615	-1.077	-0.152	4.175	-2.704	0.0107	0.0107	-2.751	conserved Plasmodium protein, unknown function	NA
2759	PF3D7_1006800	Pf3D7_10_v3	277621	+	1548	0.54	0.133	0.946	9.961	2.7	0.0108	0.0108	-3.116	single-strand telomeric DNA-binding protein GBP2, putative	GBP2
2776	PF3D7_1008500	Pf3D7_10_v3	351703	+	3891	-0.49	-0.859	-0.121	6.193	-2.699	0.0108	0.0108	-2.885	conserved Plasmodium membrane protein, unknown function	NA
4089	PF3D7_1246100	Pf3D7_12_v3	1915749	+	2050	-0.775	-1.36	-0.191	1.686	-2.697	0.0109	0.0109	-2.715	delta-aminolevulinic acid synthetase	ALAS
4897	PF3D7_1371300	Pf3D7_13_v3	2802945	+	4215	-3.514	-6.155	-0.874	2.753	-2.728	0.0109	0.0109	-2.693	28S ribosomal RNA	NA
5365	PF3D7_1443500	Pf3D7_14_v3	1780992	-	2589	1.686	0.413	2.96	0.514	2.693	0.011	0.011	-2.714	poly(A)-specific ribonuclease PARN, putative	PARN
3711	PF3D7_1208600	Pf3D7_12_v3	402300	+	228	0.901	0.22	1.583	3.599	2.689	0.0111	0.0111	-2.782	mitochondrial import inner membrane translocase subunit TIM10, putative	TIM10
2839	PF3D7_1014700	Pf3D7_10_v3	595308	+	915	0.673	0.164	1.181	4.259	2.69	0.0111	0.0111	-2.822	prohibitin, putative	NA
1301	PF3D7_0600800	Pf3D7_06_v3	35355	-	1241	2.075	0.503	3.647	-2.931	2.685	0.0112	0.0112	-2.793	rifin, pseudogene	RIF
2034	PF3D7_0807100	Pf3D7_08_v3	372902	-	3966	-0.687	-1.207	-0.167	5.68	-2.684	0.0112	0.0112	-2.882	ATP-dependent RNA helicase DHH1, putative	DHH1
4554	PF3D7_1336600	Pf3D7_13_v3	1480954	+	749	0.761	0.183	1.34	1.711	2.679	0.0114	0.0114	-2.748	conserved Plasmodium protein, unknown function	NA
3859	PF3D7_1223200	Pf3D7_12_v3	932917	+	1365	-0.586	-1.031	-0.141	5.435	-2.679	0.0114	0.0114	-2.879	nucleus export protein BRR6, putative	NA
3229	PF3D7_1111900	Pf3D7_11_v3	457936	+	1262	1.501	0.36	2.641	-1.831	2.676	0.0115	0.0115	-2.781	conserved Plasmodium protein, unknown function	NA
384	PF3D7_0217800	Pf3D7_02_v3	734272	+	324	0.437	0.104	0.771	8.66	2.67	0.0116	0.0116	-3.105	40S ribosomal protein S26	RPS26
2913	PF3D7_1021600	Pf3D7_10_v3	871095	+	792	-0.478	-0.842	-0.113	5.702	-2.666	0.0117	0.0117	-2.932	deoxyribose-phosphate aldolase, putative	NA
2412	PF3D7_0910500	Pf3D7_09_v3	482461	-	5094	-0.585	-1.032	-0.139	5.537	-2.667	0.0117	0.0117	-2.904	DNA repair protein REV1, putative	NA
5251	PF3D7_1432200	Pf3D7_14_v3	1263826	+	5186	-0.982	-1.73	-0.233	1.705	-2.666	0.0117	0.0117	-2.79	conserved Plasmodium protein, unknown function	NA
4443	PF3D7_1325700	Pf3D7_13_v3	1068050	-	586	1.699	0.399	2.999	-2.212	2.659	0.012	0.012	-2.819	conserved Plasmodium protein, unknown function	NA
5368	PF3D7_1443800	Pf3D7_14_v3	1794708	-	1227	-0.554	-0.977	-0.13	5.923	-2.657	0.012	0.012	-2.961	pre-mRNA-splicing factor CWC24, putative	CWC24
4485	PF3D7_1329900	Pf3D7_13_v3	1269311	+	2124	1.173	0.273	2.073	-0.256	2.651	0.0122	0.0122	-2.8	conserved Plasmodium protein, unknown function	NA
2466	PF3D7_0915900	Pf3D7_09_v3	665978	+	501	-0.518	-0.916	-0.121	6.294	-2.651	0.0122	0.0122	-2.996	conserved Plasmodium protein, unknown function	NA
3080	PF3D7_1038100	Pf3D7_10_v3	1507582	-	2943	-0.617	-1.091	-0.144	5.465	-2.651	0.0122	0.0122	-2.943	GDP dissociation inhibitor, putative	NA
479	PF3D7_0303700	Pf3D7_03_v3	191245	-	1347	2.038	0.471	3.605	-0.875	2.647	0.0124	0.0124	-2.815	lipoamide acyltransferase component of branched-chain alpha-keto acid dehydrogenase complex	BCKDH-E2
4442	PF3D7_1325600	Pf3D7_13_v3	1067097	+	589	1.57	0.363	2.776	-2.718	2.645	0.0124	0.0124	-2.853	mitochondrial fission 1 protein, putative	FIS1
2205	PF3D7_0824100	Pf3D7_08_v3	1052771	+	1221	1.624	0.371	2.876	-2.27	2.636	0.0126	0.0126	-2.865	exonuclease, putative	NA
1207	PF3D7_0524800	Pf3D7_05_v3	1021408	-	2900	-0.618	-1.096	-0.139	4.639	-2.624	0.013	0.013	-2.942	ubiquitin fusion degradation protein 1, putative	UFD1
2850	PF3D7_1015600	Pf3D7_10_v3	627044	-	1997	0.871	0.195	1.548	4.879	2.619	0.0132	0.0132	-3.011	heat shock protein 60	HSP60
1820	PF3D7_0719000	Pf3D7_07_v3	838135	+	462	0.647	0.145	1.149	4.154	2.619	0.0132	0.0132	-2.957	conserved Plasmodium protein, unknown function	NA
4689	PF3D7_1350100	Pf3D7_13_v3	2005962	-	1989	0.41	0.092	0.729	9.438	2.618	0.0132	0.0132	-3.264	lysine--tRNA ligase	KRS1
4245	PF3D7_1306200	Pf3D7_13_v3	289564	-	1437	1.46	0.325	2.596	-3.779	2.615	0.0133	0.0133	-2.934	conserved Plasmodium protein, unknown function	NA
1807	PF3D7_0717600	Pf3D7_07_v3	758720	-	4158	1.807	0.402	3.212	2.158	2.623	0.0134	0.0134	-2.892	conserved Plasmodium protein, unknown function	NA
4439	PF3D7_1325300	Pf3D7_13_v3	1050915	+	405	-1.282	-2.282	-0.282	-0.957	-2.608	0.0135	0.0135	-2.887	conserved Plasmodium protein, unknown function	NA
872	PF3D7_0417500	Pf3D7_04_v3	777200	-	2225	0.944	0.204	1.685	0.83	2.594	0.014	0.014	-2.903	memo-like protein	NA
3448	PF3D7_1133300	Pf3D7_11_v3	1290501	+	1101	1.244	0.267	2.221	-2.329	2.59	0.0141	0.0141	-2.935	LEM3/CDC50 family protein, putative	NA
4989	PF3D7_1406800	Pf3D7_14_v3	246380	-	1342	1.205	0.259	2.15	-0.274	2.591	0.0141	0.0141	-2.904	glideosome associated protein with multiple membrane spans 3	GAPM3
641	PF3D7_0319500	Pf3D7_03_v3	815569	+	1287	0.451	0.097	0.806	7.303	2.591	0.0141	0.0141	-3.208	RNA-binding protein, putative	NA
4260	PF3D7_1307700	Pf3D7_13_v3	344525	+	3708	-0.496	-0.886	-0.106	6.449	-2.585	0.0143	0.0143	-3.147	conserved Plasmodium protein, unknown function	NA
4307	PF3D7_1312300	Pf3D7_13_v3	519599	-	843	1.254	0.266	2.242	-2.798	2.582	0.0144	0.0144	-2.968	mitochondrial ribosomal protein S35 precursor, putative	NA
4987	PF3D7_1406600	Pf3D7_14_v3	239747	+	4026	1.182	0.25	2.114	0.6	2.579	0.0145	0.0145	-2.93	ATP-dependent Clp protease regulatory subunit ClpC, putative	ClpC
4942	PF3D7_1402300	Pf3D7_14_v3	85883	-	2001	-0.528	-0.945	-0.111	7.033	-2.574	0.0147	0.0147	-3.205	26S proteasome regulatory subunit RPN6	RPN6
1171	PF3D7_0521200	Pf3D7_05_v3	868892	+	987	-1.028	-1.842	-0.215	0.354	-2.57	0.0148	0.0148	-2.943	conserved Plasmodium protein, unknown function	NA
3109	PF3D7_1041200	Pf3D7_10_v3	1639171	+	1348	-1.333	-2.387	-0.279	0.886	-2.571	0.0148	0.0148	-2.941	rifin	RIF
602	PF3D7_0315700	Pf3D7_03_v3	638283	+	3024	-0.564	-1.012	-0.116	4.337	-2.562	0.0151	0.0151	-3.062	conserved Plasmodium membrane protein, unknown function	NA
1166	PF3D7_0520700	Pf3D7_05_v3	845843	-	2925	-0.574	-1.03	-0.118	4.622	-2.562	0.0151	0.0151	-3.062	conserved Plasmodium protein, unknown function	NA
276	PF3D7_0207300	Pf3D7_02_v3	290168	-	2536	-1.38	-2.478	-0.281	-4.099	-2.555	0.0154	0.0154	-3.044	serine repeat antigen 8	SERA8
610	PF3D7_0316400	Pf3D7_03_v3	662126	-	3027	1.079	0.219	1.94	0.195	2.551	0.0155	0.0155	-2.983	conserved Plasmodium protein, unknown function	NA
1419	PF3D7_0612500	Pf3D7_06_v3	522300	-	366	0.692	0.14	1.244	2.183	2.549	0.0156	0.0156	-3.005	conserved Plasmodium protein, unknown function	NA
1596	PF3D7_0629500	Pf3D7_06_v3	1213948	-	2058	0.366	0.074	0.658	7.545	2.548	0.0156	0.0156	-3.313	amino acid transporter, putative	NA
2435	PF3D7_0912800	Pf3D7_09_v3	563329	-	1851	-0.466	-0.838	-0.094	7.058	-2.546	0.0157	0.0157	-3.273	tRNA (adenine(58)-N(1))-methyltransferase non-catalytic subunit TRM6, putative	GCD10
1773	PF3D7_0714200	Pf3D7_07_v3	650834	+	4086	-0.53	-0.953	-0.106	6.911	-2.545	0.0157	0.0157	-3.268	conserved Plasmodium protein, unknown function	NA
710	PF3D7_0401500	Pf3D7_04_v3	89153	+	1032	1.103	0.221	1.984	2.996	2.544	0.0158	0.0158	-3.052	stevor, pseudogene	NA
400	PF3D7_0219400	Pf3D7_02_v3	774815	+	1222	0.539	0.107	0.971	5.757	2.536	0.0161	0.0161	-3.222	ribosome associated membrane protein RAMP4, putative, unspecified product	NA
401	PF3D7_0219400	Pf3D7_02_v3	774815	+	1222	0.539	0.107	0.971	5.757	2.536	0.0161	0.0161	-3.222	ribosome associated membrane protein RAMP4, putative, unspecified product	NA
645	PF3D7_0319900	Pf3D7_03_v3	833833	-	945	-0.828	-1.492	-0.164	3.598	-2.536	0.0161	0.0161	-3.063	conserved Plasmodium protein, unknown function	NA
2716	PF3D7_1002500	Pf3D7_10_v3	123770	-	1113	0.56	0.11	1.01	7.084	2.532	0.0162	0.0162	-3.324	conserved Plasmodium protein, unknown function	NA
3421	PF3D7_1130600	Pf3D7_11_v3	1176441	+	3265	-0.617	-1.113	-0.122	5.795	-2.533	0.0162	0.0162	-3.206	methyltransferase, putative	NA
176	PF3D7_0113300	Pf3D7_01_v3	504938	-	1937	0.677	0.133	1.222	8.325	2.53	0.0163	0.0163	-3.402	Plasmodium exported protein (hyp1), unknown function	NA
5382	PF3D7_1445200	Pf3D7_14_v3	1856700	+	2609	0.442	0.087	0.798	8.657	2.53	0.0163	0.0163	-3.41	ATP-dependent RNA helicase MAK5, putative	MAK5
2731	PF3D7_1004000	Pf3D7_10_v3	179344	-	883	0.393	0.076	0.71	9.73	2.524	0.0165	0.0165	-3.476	60S ribosomal protein L13, putative	NA
616	PF3D7_0317000	Pf3D7_03_v3	682795	-	891	0.56	0.109	1.012	7.261	2.523	0.0166	0.0166	-3.347	proteasome subunit alpha type-3, putative	NA
4746	PF3D7_1355800	Pf3D7_13_v3	2214445	+	641	0.518	0.1	0.935	4.712	2.52	0.0167	0.0167	-3.185	splicing factor 3B subunit 5, putative	SF3B5
1960	PF3D7_0732900	Pf3D7_07_v3	1414434	+	1250	-1.34	-2.423	-0.258	1.459	-2.519	0.0167	0.0167	-3.045	rifin	RIF
5594	PF3D7_1466200	Pf3D7_14_v3	2694813	-	9237	-0.802	-1.45	-0.154	5.425	-2.518	0.0168	0.0168	-3.249	conserved Plasmodium protein, unknown function	NA
3428	PF3D7_1131300	Pf3D7_11_v3	1201922	-	1698	1.829	0.345	3.313	-1.563	2.507	0.0172	0.0172	-3.067	conserved Plasmodium protein, unknown function	NA
2990	PF3D7_1029200	Pf3D7_10_v3	1195677	+	1668	-0.371	-0.672	-0.07	6.624	-2.505	0.0173	0.0173	-3.331	WD repeat-containing protein, putative	NA
2573	PF3D7_0926400	Pf3D7_09_v3	1070965	-	1991	-0.511	-0.926	-0.096	4.798	-2.504	0.0173	0.0173	-3.205	monocarboxylate transporter, putative	NA
1589	PF3D7_0628800	Pf3D7_06_v3	1185996	-	2649	1.255	0.235	2.275	-0.154	2.503	0.0174	0.0174	-3.064	glutamyl-tRNA(Gln) amidotransferase subunit B	GATB
4090	PF3D7_1246200	Pf3D7_12_v3	1920784	+	1131	1.038	0.193	1.882	4.362	2.5	0.0175	0.0175	-3.22	actin I	ACT1
5696	PF3D7_1476500	Pf3D7_14_v3	3147490	+	1095	2.261	0.423	4.099	1.015	2.513	0.0176	0.0176	-3.08	probable protein, unknown function	NA
2968	PF3D7_1027200	Pf3D7_10_v3	1138002	+	1563	0.506	0.094	0.919	6.159	2.495	0.0177	0.0177	-3.34	mitochondrial ribosomal protein S22 precursor, putative	NA
5567	PF3D7_1463500	Pf3D7_14_v3	2577974	+	1406	0.478	0.088	0.867	7.206	2.496	0.0177	0.0177	-3.412	fam-a protein	NA
4152	PF3D7_1252300	Pf3D7_12_v3	2128400	-	387	0.827	0.152	1.502	7.585	2.495	0.0179	0.0179	-3.428	conserved Plasmodium protein, unknown function	NA
2459	PF3D7_0915200	Pf3D7_09_v3	645632	+	969	-0.731	-1.327	-0.134	2.348	-2.491	0.0179	0.0179	-3.108	ribonuclease H2 subunit C, putative	NA
544	PF3D7_0310200	Pf3D7_03_v3	427290	+	13653	0.432	0.079	0.786	9.284	2.49	0.018	0.018	-3.53	phd finger protein, putative	NA
3443	PF3D7_1132800	Pf3D7_11_v3	1271204	+	777	1.086	0.198	1.975	3.018	2.486	0.0181	0.0181	-3.177	aquaglyceroporin	AQP
1338	PF3D7_0604500	Pf3D7_06_v3	189012	+	9067	0.537	0.098	0.976	11.812	2.486	0.0181	0.0181	-3.675	conserved Plasmodium protein, unknown function	NA
5602	PF3D7_1467000	Pf3D7_14_v3	2742387	+	2871	-0.514	-0.935	-0.093	4.597	-2.485	0.0182	0.0182	-3.238	conserved Plasmodium membrane protein, unknown function	NA
1784	PF3D7_0715300	Pf3D7_07_v3	684539	-	2153	1.319	0.238	2.4	-3.669	2.482	0.0183	0.0183	-3.139	calcium/calmodulin-dependent protein kinase, putative	NA
3078	PF3D7_1038000	Pf3D7_10_v3	1505835	+	1062	0.424	0.076	0.771	9.77	2.481	0.0183	0.0183	-3.571	antigen UB05	NA
3079	PF3D7_1038000	Pf3D7_10_v3	1505835	+	1062	0.424	0.076	0.771	9.77	2.481	0.0183	0.0183	-3.571	antigen UB05	NA
3937	PF3D7_1230900	Pf3D7_12_v3	1267368	+	2814	0.419	0.075	0.762	9.517	2.478	0.0184	0.0184	-3.573	serine/threonine protein kinase RIO1, putative	RIO1
3930	PF3D7_1230200	Pf3D7_12_v3	1245535	+	3636	1.143	0.204	2.082	2.68	2.476	0.0185	0.0185	-3.172	vacuolar transporter chaperone, putative, pseudogene	NA
4919	PF3D7_1400100	Pf3D7_14_v3	1393	+	3951	-1.002	-1.824	-0.179	5.151	-2.479	0.0185	0.0185	-3.299	erythrocyte membrane protein 1 (PfEMP1), pseudogene	NA
5231	PF3D7_1430200	Pf3D7_14_v3	1188349	+	3118	0.741	0.132	1.351	3.478	2.474	0.0186	0.0186	-3.238	plasmepsin IX	NA
1874	PF3D7_0724400	Pf3D7_07_v3	1023651	+	471	-0.526	-0.958	-0.093	5.298	-2.474	0.0186	0.0186	-3.29	mitochondrial import inner membrane translocase subunit TIM14, putative	PAM18
3924	PF3D7_1229700	Pf3D7_12_v3	1218181	+	586	1.421	0.251	2.59	-4.021	2.471	0.0188	0.0188	-3.167	conserved Plasmodium protein, unknown function	NA
488	PF3D7_0304600	Pf3D7_03_v3	221323	-	1194	1.173	0.209	2.137	6.241	2.484	0.0188	0.0188	-3.46	circumsporozoite (CS) protein	CSP
1479	PF3D7_0618300	Pf3D7_06_v3	768792	+	665	0.395	0.068	0.722	9.258	2.455	0.0195	0.0195	-3.594	60S ribosomal protein L27a, putative	NA
2830	PF3D7_1013800	Pf3D7_10_v3	542359	+	2421	1.542	0.263	2.82	0.585	2.455	0.0196	0.0196	-3.166	conserved Plasmodium protein, unknown function	NA
1324	PF3D7_0603100	Pf3D7_06_v3	125458	-	1359	-0.819	-1.499	-0.14	0.722	-2.453	0.0196	0.0196	-3.154	RNA-binding protein, putative	NA
2056	PF3D7_0809300	Pf3D7_08_v3	474253	-	1033	1.943	0.33	3.556	-1.885	2.451	0.0197	0.0197	-3.165	unspecified product	NA
912	PF3D7_0421500	Pf3D7_04_v3	981823	-	1168	1.517	0.258	2.777	-2.212	2.451	0.0197	0.0197	-3.167	rifin, pseudogene	RIF
422	PF3D7_0221500	Pf3D7_02_v3	863079	-	764	1.494	0.252	2.736	-2.297	2.447	0.0199	0.0199	-3.171	Pfmc-2TM Maurer's cleft two transmembrane protein, pseudogene	NA
3855	PF3D7_1222800	Pf3D7_12_v3	920790	-	1627	1.366	0.23	2.503	-3.799	2.445	0.0199	0.0199	-3.204	conserved Plasmodium protein, unknown function	NA
1285	PF3D7_0532300	Pf3D7_05_v3	1308278	+	1663	0.936	0.159	1.714	9.618	2.46	0.0199	0.0199	-3.638	Plasmodium exported protein (PHISTb), unknown function	NA
863	PF3D7_0416600	Pf3D7_04_v3	726265	+	864	1.432	0.241	2.624	-0.427	2.444	0.02	0.02	-3.166	prohibitin-like protein, putative	NA
3172	PF3D7_1106200	Pf3D7_11_v3	260867	+	2465	1.205	0.202	2.208	-0.863	2.443	0.02	0.02	-3.169	conserved Plasmodium protein, unknown function	NA
3949	PF3D7_1232100	Pf3D7_12_v3	1328311	-	3061	0.664	0.111	1.217	4.176	2.444	0.02	0.02	-3.324	60 kDa chaperonin	CPN60
4570	PF3D7_1338200	Pf3D7_13_v3	1545070	-	666	0.306	0.051	0.56	10.472	2.443	0.02	0.02	-3.687	60S ribosomal protein L6-2, putative	NA
204	PF3D7_0200300	Pf3D7_02_v3	35927	-	1323	1.522	0.255	2.789	2.328	2.451	0.0201	0.0201	-3.25	erythrocyte membrane protein 1 (PfEMP1), exon 2	NA
5397	PF3D7_1446700	Pf3D7_14_v3	1919583	-	2063	1.144	0.191	2.097	0.885	2.442	0.0201	0.0201	-3.184	conserved Plasmodium protein, unknown function	NA
1286	PF3D7_0532400	Pf3D7_05_v3	1312471	+	1684	0.773	0.129	1.417	7.337	2.442	0.0202	0.0202	-3.537	lysine-rich membrane-associated PHISTb protein	LyMP
535	PF3D7_0309300	Pf3D7_03_v3	397649	+	2868	-0.547	-1.003	-0.09	7.649	-2.437	0.0203	0.0203	-3.536	N2227-like protein, putative	NA
3973	PF3D7_1234500	Pf3D7_12_v3	1439896	-	1155	-0.6	-1.101	-0.099	5.572	-2.436	0.0203	0.0203	-3.382	conserved Plasmodium protein, unknown function	NA
1963	PF3D7_0800200	Pf3D7_08_v3	29700	-	9334	1.561	0.256	2.866	3.106	2.441	0.0206	0.0206	-3.293	erythrocyte membrane protein 1, PfEMP1	VAR
2214	PF3D7_0825000	Pf3D7_08_v3	1086048	+	5201	-0.614	-1.128	-0.1	5.179	-2.43	0.0206	0.0206	-3.392	conserved Plasmodium protein, unknown function	NA
809	PF3D7_0411300	Pf3D7_04_v3	510380	+	2169	1.269	0.207	2.331	0.303	2.43	0.0207	0.0207	-3.196	conserved Plasmodium protein, unknown function	NA
3335	PF3D7_1122200	Pf3D7_11_v3	842991	-	2557	0.486	0.079	0.894	7.055	2.428	0.0207	0.0207	-3.528	cupin-like protein, putative	NA
2486	PF3D7_0917900	Pf3D7_09_v3	737985	+	2292	0.393	0.064	0.722	11.445	2.429	0.0207	0.0207	-3.767	heat shock protein 70	HSP70-2
63	PF3D7_0102100	Pf3D7_01_v3	95050	+	850	-2.446	-4.493	-0.399	0.008	-2.437	0.0207	0.0207	-3.191	stevor, pseudogene	NA
2130	PF3D7_0816600	Pf3D7_08_v3	762118	-	3213	0.779	0.126	1.432	5.087	2.427	0.0208	0.0208	-3.414	chaperone protein ClpB1	ClpB1
4885	PF3D7_1369700	Pf3D7_13_v3	2778005	-	1067	0.463	0.075	0.851	5.899	2.424	0.0209	0.0209	-3.464	U2 small nuclear ribonucleoprotein A', putative	NA
5414	PF3D7_1448400	Pf3D7_14_v3	1980319	-	2789	0.933	0.15	1.716	1.591	2.422	0.021	0.021	-3.229	ubiquitin-protein ligase, putative	HRD3
1733	PF3D7_0710200	Pf3D7_07_v3	463105	+	8733	0.962	0.154	1.77	7.349	2.428	0.0212	0.0212	-3.58	conserved Plasmodium protein, unknown function	NA
2058	PF3D7_0809500	Pf3D7_08_v3	478512	-	315	-0.668	-1.23	-0.106	4.295	-2.419	0.0212	0.0212	-3.334	histone acetyltransferase subunit NuA4, putative	NA
4920	PF3D7_1400200	Pf3D7_14_v3	7208	-	1331	-1.333	-2.454	-0.212	1.338	-2.418	0.0212	0.0212	-3.221	rifin	RIF
956	PF3D7_0425800	Pf3D7_04_v3	1156423	+	11399	1.448	0.231	2.664	4.428	2.431	0.0213	0.0213	-3.408	erythrocyte membrane protein 1, PfEMP1	VAR
983	PF3D7_0502400	Pf3D7_05_v3	109898	-	1794	-0.453	-0.834	-0.072	8.594	-2.417	0.0213	0.0213	-3.63	merozoite surface protein 8	MSP8
4158	PF3D7_1252900	Pf3D7_12_v3	2162707	-	439	1.407	0.223	2.59	5.042	2.428	0.0214	0.0214	-3.428	Plasmodium exported protein, unknown function	NA
2246	PF3D7_0828200	Pf3D7_08_v3	1216271	+	4446	0.733	0.115	1.351	4.989	2.414	0.0215	0.0215	-3.427	leucine--tRNA ligase, putative	NA
1607	PF3D7_0630600	Pf3D7_06_v3	1279820	+	3427	-0.6	-1.105	-0.094	5.279	-2.413	0.0215	0.0215	-3.397	conserved protein, unknown function	NA
217	PF3D7_0201600	Pf3D7_02_v3	77251	-	1558	0.564	0.088	1.041	8.375	2.41	0.0216	0.0216	-3.644	PHISTb domain-containing RESA-like protein 1	RLP1
3222	PF3D7_1111200	Pf3D7_11_v3	439698	-	1983	-0.522	-0.962	-0.081	5.016	-2.408	0.0217	0.0217	-3.403	conserved Plasmodium protein, unknown function	NA
5056	PF3D7_1413100	Pf3D7_14_v3	527132	+	2103	1.173	0.182	2.164	-3.877	2.406	0.0218	0.0218	-3.263	conserved Plasmodium protein, unknown function	NA
5159	PF3D7_1423200	Pf3D7_14_v3	933059	+	2299	0.619	0.096	1.142	6.592	2.406	0.0218	0.0218	-3.538	peptidyl-prolyl cis-trans isomerase	CYP52
3792	PF3D7_1216500	Pf3D7_12_v3	657339	-	666	1.789	0.276	3.302	-1.968	2.405	0.0219	0.0219	-3.237	male development gene 1	MDV1
2936	PF3D7_1023900	Pf3D7_10_v3	997475	-	9987	0.763	0.118	1.409	10.804	2.412	0.0219	0.0219	-3.796	chromodomain-helicase-DNA-binding protein 1 homolog, putative	CHD1
4571	PF3D7_1338300	Pf3D7_13_v3	1548692	+	1705	0.348	0.053	0.642	10.217	2.401	0.0221	0.0221	-3.759	elongation factor 1-gamma, putative	NA
2790	PF3D7_1009900	Pf3D7_10_v3	399207	+	2572	-0.539	-0.995	-0.082	5.42	-2.402	0.0221	0.0221	-3.452	conserved Plasmodium protein, unknown function	NA
2403	PF3D7_0909600	Pf3D7_09_v3	433238	-	2136	-0.789	-1.458	-0.12	3.185	-2.398	0.0222	0.0222	-3.347	conserved Plasmodium protein, unknown function	NA
2093	PF3D7_0812800	Pf3D7_08_v3	635537	-	219	-0.899	-1.663	-0.136	1.157	-2.395	0.0224	0.0224	-3.258	conserved Plasmodium protein, unknown function	NA
227	PF3D7_0202600	Pf3D7_02_v3	129342	-	4222	0.637	0.096	1.179	4.905	2.392	0.0225	0.0225	-3.462	conserved Plasmodium protein, unknown function	NA
228	PF3D7_0202600	Pf3D7_02_v3	129342	-	4222	0.637	0.096	1.179	4.905	2.392	0.0225	0.0225	-3.462	conserved Plasmodium protein, unknown function	NA
5361	PF3D7_1443100	Pf3D7_14_v3	1769626	-	1725	-0.627	-1.161	-0.094	5.91	-2.392	0.0225	0.0225	-3.508	conserved Plasmodium protein, unknown function	NA
3464	PF3D7_1134900	Pf3D7_11_v3	1369619	+	2049	-0.823	-1.523	-0.124	0.822	-2.393	0.0225	0.0225	-3.265	conserved Plasmodium protein, unknown function	NA
290	PF3D7_0208700	Pf3D7_02_v3	356501	-	1514	0.606	0.09	1.121	5.716	2.39	0.0226	0.0226	-3.511	conserved Plasmodium protein, unknown function, unspecified product	NA
291	PF3D7_0208700	Pf3D7_02_v3	356501	-	1514	0.606	0.09	1.121	5.716	2.39	0.0226	0.0226	-3.511	conserved Plasmodium protein, unknown function, unspecified product	NA
993	PF3D7_0503400	Pf3D7_05_v3	140710	+	762	1.172	0.172	2.172	1.456	2.384	0.023	0.023	-3.297	actin-depolymerizing factor 1	ADF1
3683	PF3D7_1205800	Pf3D7_12_v3	256367	+	7365	0.38	0.056	0.705	9.586	2.384	0.023	0.023	-3.764	high mobility group protein B3, putative	HMGB3
874	PF3D7_0417700	Pf3D7_04_v3	784194	+	2237	1.338	0.195	2.482	-4.207	2.38	0.0232	0.0232	-3.307	conserved Plasmodium protein, unknown function	NA
4482	PF3D7_1329600	Pf3D7_13_v3	1258956	-	906	0.353	0.051	0.655	8.437	2.379	0.0232	0.0232	-3.711	conserved Plasmodium protein, unknown function	NA
4820	PF3D7_1363200	Pf3D7_13_v3	2539948	-	1593	-0.65	-1.205	-0.095	4.49	-2.38	0.0232	0.0232	-3.418	bifunctional polynucleotide phosphatase/kinase	PNKP
2356	PF3D7_0905300	Pf3D7_09_v3	251353	-	18357	0.535	0.078	0.992	4.194	2.378	0.0233	0.0233	-3.461	dynein heavy chain, putative	NA
540	PF3D7_0309800	Pf3D7_03_v3	412089	+	1674	0.569	0.08	1.057	6.711	2.369	0.0238	0.0238	-3.631	YTH domain-containing protein, putative	NA
2394	PF3D7_0908700	Pf3D7_09_v3	401495	-	1900	0.498	0.07	0.925	3.353	2.369	0.0238	0.0238	-3.395	tRNA pseudouridine synthase, putative	NA
1785	PF3D7_0715400	Pf3D7_07_v3	687891	-	958	1.415	0.2	2.631	-3.631	2.368	0.0239	0.0239	-3.318	secreted ookinete protein, putative	PSOP20
5224	PF3D7_1429500	Pf3D7_14_v3	1164332	+	2235	-0.512	-0.951	-0.072	5.729	-2.366	0.0239	0.0239	-3.531	diphthamide biosynthesis protein 2, putative	DPH2
5630	PF3D7_1469800	Pf3D7_14_v3	2865024	-	1222	0.999	0.139	1.858	2.146	2.363	0.0241	0.0241	-3.36	conserved Plasmodium protein, unknown function	NA
4261	PF3D7_1307800	Pf3D7_13_v3	348743	-	2046	0.588	0.081	1.095	7.003	2.361	0.0242	0.0242	-3.662	fork head domain protein, putative	NA
548	PF3D7_0310600	Pf3D7_03_v3	461175	-	853	0.493	0.068	0.918	7.002	2.36	0.0243	0.0243	-3.66	eukaryotic translation initiation factor 3 subunit K, putative, unspecified product	EIF3K
549	PF3D7_0310600	Pf3D7_03_v3	461175	-	853	0.493	0.068	0.918	7.002	2.36	0.0243	0.0243	-3.66	eukaryotic translation initiation factor 3 subunit K, putative, unspecified product	EIF3K
203	PF3D7_0200200	Pf3D7_02_v3	33030	-	1230	-1.474	-2.745	-0.202	1.476	-2.359	0.0244	0.0244	-3.336	rifin	RIF
3754	PF3D7_1212700	Pf3D7_12_v3	558047	-	4134	0.548	0.075	1.021	12.003	2.357	0.0245	0.0245	-3.959	eukaryotic translation initiation factor 3 subunit A, putative	EIF3A
2612	PF3D7_0930200	Pf3D7_09_v3	1195693	-	2770	1.872	0.254	3.49	-1.935	2.354	0.0247	0.0247	-3.323	leucine-rich repeat protein	LRR8
1559	PF3D7_0625900	Pf3D7_06_v3	1046986	+	1067	-0.889	-1.658	-0.121	-0.404	-2.353	0.0247	0.0247	-3.324	conserved Plasmodium protein, unknown function	NA
114	PF3D7_0107100	Pf3D7_01_v3	295300	-	1632	0.978	0.132	1.824	-1.139	2.351	0.0248	0.0248	-3.324	conserved Plasmodium protein, unknown function	NA
3870	PF3D7_1224300	Pf3D7_12_v3	988628	+	2628	0.391	0.053	0.729	13.357	2.35	0.0249	0.0249	-4.022	polyadenylate-binding protein, putative	PABP
4044	PF3D7_1241600	Pf3D7_12_v3	1774901	+	1682	1.075	0.142	2.008	-0.172	2.344	0.0252	0.0252	-3.342	mitochondrial carrier protein, putative	NA
464	PF3D7_0302200	Pf3D7_03_v3	119458	+	5278	1.071	0.141	2.001	1.429	2.343	0.0252	0.0252	-3.382	cytoadherence linked asexual protein 3.2	CLAG3.2
2883	PF3D7_1018700	Pf3D7_10_v3	747028	+	1860	-0.417	-0.778	-0.055	8.326	-2.344	0.0252	0.0252	-3.76	conserved Plasmodium protein, unknown function	NA
1229	PF3D7_0526900	Pf3D7_05_v3	1123610	+	986	0.377	0.05	0.704	8.274	2.343	0.0253	0.0253	-3.775	transmembrane emp24 domain-containing protein, putative	NA
611	PF3D7_0316500	Pf3D7_03_v3	667006	+	1386	1.312	0.172	2.452	-0.271	2.341	0.0254	0.0254	-3.348	kinetochore protein NUF2, putative	NUF2
3035	PF3D7_1033600	Pf3D7_10_v3	1344150	-	2748	-0.393	-0.735	-0.051	8.566	-2.34	0.0254	0.0254	-3.782	myb2 transcription factor, putative	Myb2
3061	PF3D7_1036400	Pf3D7_10_v3	1436316	+	3489	2.027	0.265	3.788	1.471	2.35	0.0256	0.0256	-3.38	liver stage antigen 1	LSA1
5104	PF3D7_1417900	Pf3D7_14_v3	757195	-	1361	1.304	0.169	2.44	-1.653	2.337	0.0256	0.0256	-3.349	conserved Plasmodium protein, unknown function	NA
2674	PF3D7_0936300	Pf3D7_09_v3	1436687	-	1295	0.401	0.052	0.75	11.469	2.338	0.0256	0.0256	-3.955	ring-exported protein 3	REX3
3758	PF3D7_1213100	Pf3D7_12_v3	576417	-	164	-1.265	-2.368	-0.162	2.668	-2.335	0.0258	0.0258	-3.429	U1 spliceosomal RNA	NA
5710	PF3D7_1477900	Pf3D7_14_v3	3209129	+	2446	1.091	0.138	2.045	1.967	2.329	0.0261	0.0261	-3.433	acyl-CoA synthetase, pseudogene	ACS1b
4742	PF3D7_1355400	Pf3D7_13_v3	2197906	-	73	-0.821	-1.537	-0.104	-0.225	-2.328	0.0261	0.0261	-3.363	tRNA Threonine	NA
3533	PF3D7_1141300	Pf3D7_11_v3	1659070	-	3290	1.21	0.152	2.268	-1.166	2.327	0.0262	0.0262	-3.364	conserved Plasmodium protein, unknown function	NA
3813	PF3D7_1218500	Pf3D7_12_v3	725841	-	3997	0.449	0.057	0.842	8.761	2.327	0.0262	0.0262	-3.845	conserved Plasmodium protein, unknown function	NA
4562	PF3D7_1337400	Pf3D7_13_v3	1506965	+	2013	0.392	0.049	0.735	8.206	2.327	0.0262	0.0262	-3.807	conserved Plasmodium protein, unknown function	NA
3606	PF3D7_1148640	Pf3D7_11_v3	1928934	+	4205	-2.409	-4.513	-0.305	3.263	-2.343	0.0263	0.0263	-3.41	28S ribosomal RNA	NA
2203	PF3D7_0823900	Pf3D7_08_v3	1047551	+	957	0.819	0.102	1.535	3.364	2.324	0.0264	0.0264	-3.487	dicarboxylate/tricarboxylate carrier	DTC
3663	PF3D7_1203700	Pf3D7_12_v3	187146	-	1697	0.341	0.043	0.64	10.819	2.323	0.0264	0.0264	-3.956	nucleosome assembly protein	NAPL
2253	PF3D7_0828900	Pf3D7_08_v3	1241966	-	930	0.942	0.116	1.767	1.886	2.32	0.0266	0.0266	-3.432	conserved Plasmodium protein, unknown function	NA
2494	PF3D7_0918700	Pf3D7_09_v3	769452	+	2654	0.509	0.063	0.956	7.345	2.32	0.0266	0.0266	-3.779	conserved Plasmodium protein, unknown function	NA
580	PF3D7_0313700	Pf3D7_03_v3	555035	-	3650	1.503	0.185	2.821	-2.666	2.319	0.0267	0.0267	-3.384	conserved Plasmodium protein, unknown function, unspecified product	NA
581	PF3D7_0313700	Pf3D7_03_v3	555035	-	3650	1.503	0.185	2.821	-2.666	2.319	0.0267	0.0267	-3.384	conserved Plasmodium protein, unknown function, unspecified product	NA
4389	PF3D7_1320400	Pf3D7_13_v3	841671	-	1080	-0.821	-1.542	-0.101	1.52	-2.318	0.0268	0.0268	-3.41	type I signal peptidase	SPB
2224	PF3D7_0826000	Pf3D7_08_v3	1109276	+	3519	0.765	0.093	1.437	2.814	2.315	0.0269	0.0269	-3.495	conserved Plasmodium protein, unknown function	NA
5400	PF3D7_1447000	Pf3D7_14_v3	1929931	+	1449	0.319	0.039	0.599	10.621	2.315	0.0269	0.0269	-3.957	40S ribosomal protein S5	NA
2365	PF3D7_0906000	Pf3D7_09_v3	298665	-	5515	0.785	0.095	1.475	3.323	2.314	0.027	0.027	-3.501	exoribonuclease II	RNaseII
3049	PF3D7_1035000	Pf3D7_10_v3	1386649	-	2982	-0.607	-1.142	-0.072	5.853	-2.309	0.0273	0.0273	-3.671	U2 snRNA/tRNA pseudouridine synthase, putative	NA
661	PF3D7_0321500	Pf3D7_03_v3	896546	-	3225	0.922	0.109	1.734	0.394	2.306	0.0275	0.0275	-3.415	peptidase, putative	NA
1652	PF3D7_0702300	Pf3D7_07_v3	96761	+	1970	0.745	0.088	1.402	8.192	2.31	0.0275	0.0275	-3.85	sporozoite threonine and asparagine-rich protein	STARP
2012	PF3D7_0804900	Pf3D7_08_v3	279711	-	1476	-0.459	-0.863	-0.054	6.746	-2.306	0.0275	0.0275	-3.737	GTPase-activating protein, putative	NA
5670	PF3D7_1473900	Pf3D7_14_v3	3007601	+	2559	-0.484	-0.911	-0.057	6.956	-2.303	0.0276	0.0276	-3.758	conserved Plasmodium protein, unknown function	NA
818	PF3D7_0412200	Pf3D7_04_v3	541811	-	999	-0.607	-1.143	-0.071	3.669	-2.302	0.0277	0.0277	-3.506	conserved Plasmodium protein, unknown function	NA
3936	PF3D7_1230800	Pf3D7_12_v3	1263661	+	1933	-0.357	-0.672	-0.041	8.807	-2.301	0.0278	0.0278	-3.876	pre-mRNA-splicing regulator, putative	NA
1988	PF3D7_0802500	Pf3D7_08_v3	174647	-	4260	-0.496	-0.934	-0.058	6.295	-2.301	0.0278	0.0278	-3.706	inositol 5-phosphatase, putative	NA
45	PF3D7_0100300	Pf3D7_01_v3	42367	-	4141	1.409	0.163	2.654	2.736	2.305	0.028	0.028	-3.525	erythrocyte membrane protein 1, PfEMP1	VAR
4531	PF3D7_1334300	Pf3D7_13_v3	1400897	-	1380	1.065	0.121	2.008	2.788	2.295	0.0282	0.0282	-3.525	MSP7-like protein	MSRP5
4018	PF3D7_1239000	Pf3D7_12_v3	1621237	-	2469	-0.427	-0.806	-0.048	6.591	-2.293	0.0283	0.0283	-3.748	HD superfamily phosphohydrolase protein	NA
5233	PF3D7_1430400	Pf3D7_14_v3	1201748	+	2592	-0.975	-1.842	-0.109	3.367	-2.29	0.0285	0.0285	-3.503	autophagy protein 5, putative	ATG5
1890	PF3D7_0726100	Pf3D7_07_v3	1093566	-	2557	0.655	0.073	1.238	9.139	2.289	0.0287	0.0287	-3.934	Plasmodium exported protein, unknown function	NA
4252	PF3D7_1306900	Pf3D7_13_v3	323472	+	1561	-0.376	-0.711	-0.042	6.749	-2.287	0.0287	0.0287	-3.774	U1 small nuclear ribonucleoprotein A, putative	SNRPA
1035	PF3D7_0507700	Pf3D7_05_v3	316766	-	1596	-0.467	-0.882	-0.052	6.355	-2.287	0.0287	0.0287	-3.741	nuclear protein localization protein 4, putative	NPL4
1003	PF3D7_0504500	Pf3D7_05_v3	174989	+	1445	1.456	0.159	2.752	-3.84	2.283	0.0289	0.0289	-3.448	conserved Plasmodium protein, unknown function	NA
4777	PF3D7_1358900	Pf3D7_13_v3	2332196	-	2720	0.515	0.056	0.974	7.449	2.283	0.0289	0.0289	-3.843	GTP-binding protein, putative	NA
1322	PF3D7_0602900	Pf3D7_06_v3	118638	-	1566	-0.585	-1.106	-0.064	5.047	-2.284	0.0289	0.0289	-3.661	conserved Plasmodium protein, unknown function	NA
608	PF3D7_0316300	Pf3D7_03_v3	658272	+	3372	1.306	0.143	2.469	3.279	2.289	0.029	0.029	-3.581	inorganic pyrophosphatase, putative	NA
609	PF3D7_0316300	Pf3D7_03_v3	658272	+	3372	1.306	0.143	2.469	3.279	2.289	0.029	0.029	-3.581	inorganic pyrophosphatase, putative	NA
5157	PF3D7_1423000	Pf3D7_14_v3	924964	-	1464	-0.363	-0.688	-0.039	7.964	-2.281	0.0291	0.0291	-3.869	nucleolar GTP-binding protein 2, putative	NOG2
5363	PF3D7_1443300	Pf3D7_14_v3	1776010	+	653	0.56	0.06	1.06	6.82	2.279	0.0292	0.0292	-3.807	U6 snRNA-associated Sm-like protein LSm5, putative	LSM5
746	PF3D7_0405000	Pf3D7_04_v3	268960	-	2175	-0.359	-0.679	-0.039	7.046	-2.279	0.0292	0.0292	-3.806	ATP-dependent RNA helicase DDX51, putative	DDX51
582	PF3D7_0313800	Pf3D7_03_v3	559334	+	2920	1.847	0.198	3.497	-1.2	2.28	0.0293	0.0293	-3.443	conserved Plasmodium protein, unknown function	NA
1980	PF3D7_0801700	Pf3D7_08_v3	112299	+	5579	0.573	0.061	1.085	7.263	2.278	0.0293	0.0293	-3.846	sentrin-specific protease 2, putative	SENP2
2940	PF3D7_1024300	Pf3D7_10_v3	1022505	+	393	1.39	0.148	2.632	-2.197	2.276	0.0294	0.0294	-3.446	conserved Plasmodium protein, unknown function	NA
1074	PF3D7_0511600	Pf3D7_05_v3	517259	-	627	0.682	0.073	1.292	3.833	2.277	0.0294	0.0294	-3.606	apical rhoptry neck protein	ARNP
1680	PF3D7_0705100	Pf3D7_07_v3	252282	+	2970	-1.052	-1.993	-0.111	0.719	-2.273	0.0296	0.0296	-3.458	conserved Plasmodium protein, unknown function	NA
5092	PF3D7_1416700	Pf3D7_14_v3	681055	-	969	1.638	0.171	3.106	-3.208	2.271	0.0297	0.0297	-3.463	conserved Plasmodium protein, unknown function	NA
4720	PF3D7_1353100	Pf3D7_13_v3	2124272	-	999	0.588	0.061	1.114	9.332	2.269	0.0298	0.0298	-3.973	Plasmodium exported protein, unknown function	NA
4133	PF3D7_1250400	Pf3D7_12_v3	2067400	+	1971	-1.284	-2.433	-0.134	-1.149	-2.271	0.0298	0.0298	-3.456	conserved Plasmodium protein, unknown function	NA
155	PF3D7_0111200	Pf3D7_01_v3	430152	-	707	1.397	0.144	2.649	-4.002	2.268	0.0299	0.0299	-3.471	conserved Plasmodium protein, unknown function	NA
302	PF3D7_0209800	Pf3D7_02_v3	404281	-	2075	0.254	0.026	0.482	10.458	2.263	0.0303	0.0303	-4.051	ATP-dependent RNA helicase UAP56	UAP56
4101	PF3D7_1247200	Pf3D7_12_v3	1950989	-	525	-0.66	-1.254	-0.067	3.746	-2.262	0.0303	0.0303	-3.581	conserved Plasmodium protein, unknown function	NA
78	PF3D7_0103600	Pf3D7_01_v3	161131	+	5099	0.755	0.075	1.435	4.325	2.258	0.0306	0.0306	-3.677	ATP-dependent RNA helicase, putative	NA
3442	PF3D7_1132700	Pf3D7_11_v3	1268455	+	1002	-0.774	-1.472	-0.077	2.448	-2.258	0.0306	0.0306	-3.535	50S ribosomal protein L2, putative	mRPL2
2982	PF3D7_1028500	Pf3D7_10_v3	1172129	-	2869	-0.404	-0.769	-0.04	7.202	-2.256	0.0307	0.0307	-3.863	conserved Plasmodium protein, unknown function	NA
3786	PF3D7_1215900	Pf3D7_12_v3	641552	+	1968	-0.557	-1.059	-0.055	5.077	-2.255	0.0308	0.0308	-3.692	serpentine receptor, putative	SR10
2678	PF3D7_0936700	Pf3D7_09_v3	1454422	+	1299	0.615	0.06	1.17	5.89	2.254	0.0309	0.0309	-3.808	lysophospholipase, putative	NA
3268	PF3D7_1115700	Pf3D7_11_v3	592130	-	1455	0.501	0.049	0.953	8.147	2.254	0.0309	0.0309	-3.935	cysteine proteinase falcipain 2a	FP2A
1441	PF3D7_0614500	Pf3D7_06_v3	606142	-	1118	0.369	0.036	0.702	9.804	2.252	0.031	0.031	-4.032	60S ribosomal protein L19	RPL19
1143	PF3D7_0518400	Pf3D7_05_v3	762103	-	690	-0.784	-1.493	-0.076	1.585	-2.253	0.031	0.031	-3.523	cyclin, putative	CYC3
5214	PF3D7_1428600	Pf3D7_14_v3	1127042	+	1990	0.914	0.088	1.741	1.075	2.251	0.0311	0.0311	-3.525	peptide chain release factor 1	RF1
4584	PF3D7_1339600	Pf3D7_13_v3	1588404	+	1887	0.696	0.067	1.324	3.467	2.252	0.0311	0.0311	-3.622	conserved Plasmodium protein, unknown function	NA
2661	PF3D7_0935000	Pf3D7_09_v3	1366569	-	582	0.434	0.041	0.827	7.181	2.248	0.0313	0.0313	-3.893	U2 small nuclear ribonucleoprotein B'', putative	NA
371	PF3D7_0216600	Pf3D7_02_v3	686485	+	2061	-0.517	-0.984	-0.049	6.901	-2.247	0.0313	0.0313	-3.86	MtN3-like protein	NA
4464	PF3D7_1327800	Pf3D7_13_v3	1162620	+	1683	-0.642	-1.223	-0.061	7.234	-2.248	0.0313	0.0313	-3.874	ribose-phosphate pyrophosphokinase, putative	NA
2104	PF3D7_0813900	Pf3D7_08_v3	677989	-	737	0.342	0.032	0.651	10.111	2.246	0.0314	0.0314	-4.06	40S ribosomal protein S16, putative	NA
2963	PF3D7_1026600	Pf3D7_10_v3	1113495	-	5079	0.865	0.082	1.649	7.034	2.252	0.0315	0.0315	-3.915	conserved Plasmodium protein, unknown function	NA
5705	PF3D7_1477400	Pf3D7_14_v3	3183248	+	1105	1.359	0.127	2.59	1.141	2.246	0.0316	0.0316	-3.55	Plasmodium exported protein (PHIST), unknown function	NA
94	PF3D7_0105200	Pf3D7_01_v3	222254	-	1707	0.949	0.089	1.809	1.461	2.245	0.0316	0.0316	-3.549	RAP protein, putative	NA
4012	PF3D7_1238400	Pf3D7_12_v3	1592402	-	1231	0.913	0.085	1.74	-0.264	2.244	0.0316	0.0316	-3.51	conserved Plasmodium protein, unknown function	NA
1392	PF3D7_0609800	Pf3D7_06_v3	421157	-	1466	0.569	0.053	1.085	4.093	2.244	0.0316	0.0316	-3.714	palmitoyltransferase DHHC2, putative	DHHC2
418	PF3D7_0221100	Pf3D7_02_v3	851052	+	911	-1.363	-2.599	-0.126	-3.509	-2.241	0.0318	0.0318	-3.51	Plasmodium exported protein, unknown function, pseudogene	NA
4411	PF3D7_1322500	Pf3D7_13_v3	953154	+	2636	1.389	0.128	2.649	-1.508	2.24	0.0319	0.0319	-3.502	palmitoyltransferase DHHC5	DHHC5
4025	PF3D7_1239700	Pf3D7_12_v3	1655487	+	2643	0.703	0.065	1.341	3.16	2.24	0.0319	0.0319	-3.647	ATP-dependent zinc metalloprotease FTSH 1	FTSH1
128	PF3D7_0108500	Pf3D7_01_v3	349170	+	540	0.527	0.048	1.007	10.747	2.236	0.0321	0.0321	-4.127	conserved Plasmodium protein, unknown function	NA
5642	PF3D7_1471000	Pf3D7_14_v3	2902134	+	1404	-0.372	-0.711	-0.034	6.529	-2.237	0.0321	0.0321	-3.851	RNA 3'-terminal phosphate cyclase-like protein, putative	RCL1
2107	PF3D7_0814200	Pf3D7_08_v3	687340	+	747	0.628	0.057	1.199	12.419	2.242	0.0322	0.0322	-4.213	DNA/RNA-binding protein Alba 1	ALBA1
3182	PF3D7_1107200	Pf3D7_11_v3	297823	+	2912	0.611	0.055	1.167	5.027	2.236	0.0322	0.0322	-3.763	conserved Plasmodium protein, unknown function	NA
278	PF3D7_0207500	Pf3D7_02_v3	298897	-	3668	1.596	0.143	3.048	-2.346	2.234	0.0323	0.0323	-3.511	serine repeat antigen 6	SERA6
3302	PF3D7_1118900	Pf3D7_11_v3	716795	+	1618	0.72	0.065	1.376	0.795	2.234	0.0323	0.0323	-3.539	conserved Plasmodium protein, unknown function	NA
5656	PF3D7_1472400	Pf3D7_14_v3	2957474	+	4145	-0.629	-1.202	-0.056	4.505	-2.232	0.0325	0.0325	-3.71	M1-family alanyl aminopeptidase, putative	NA
978	PF3D7_0501900	Pf3D7_05_v3	95161	-	1473	-0.573	-1.095	-0.05	3.238	-2.23	0.0326	0.0326	-3.62	conserved protein, unknown function	NA
3863	PF3D7_1223600	Pf3D7_12_v3	962631	-	4861	-0.514	-0.982	-0.045	3.541	-2.229	0.0327	0.0327	-3.64	conserved Plasmodium protein, unknown function	NA
5647	PF3D7_1471500	Pf3D7_14_v3	2922351	-	2207	1.225	0.106	2.343	-2.686	2.227	0.0328	0.0328	-3.523	conserved protein, unknown function	NA
5726	PF3D7_1479500	Pf3D7_14_v3	3269494	+	1003	-1.423	-2.723	-0.123	-3	-2.227	0.0328	0.0328	-3.527	stevor	NA
4306	PF3D7_1312200	Pf3D7_13_v3	518107	+	1261	1.548	0.133	2.964	-2.956	2.225	0.033	0.033	-3.529	conserved Plasmodium protein, unknown function	NA
2780	PF3D7_1008900	Pf3D7_10_v3	369199	-	1027	0.391	0.034	0.749	7.274	2.224	0.033	0.033	-3.94	adenylate kinase	AK1
4425	PF3D7_1323900	Pf3D7_13_v3	989468	+	1131	-0.48	-0.918	-0.041	8.125	-2.225	0.033	0.033	-3.986	protein BCP1, putative	NA
3901	PF3D7_1227400	Pf3D7_12_v3	1109151	-	3519	-0.489	-0.936	-0.042	6.614	-2.223	0.0331	0.0331	-3.888	conserved Plasmodium protein, unknown function	NA
1973	PF3D7_0801000	Pf3D7_08_v3	84568	-	3855	0.533	0.045	1.021	10.119	2.222	0.0332	0.0332	-4.125	Plasmodium exported protein (PHISTc), unknown function	NA
188	PF3D7_0114600	Pf3D7_01_v3	560474	-	1061	1.482	0.123	2.84	-0.946	2.218	0.0334	0.0334	-3.542	stevor, pseudogene	NA
5442	PF3D7_1451200	Pf3D7_14_v3	2094340	-	5397	0.389	0.032	0.745	10.799	2.218	0.0335	0.0335	-4.164	conserved Plasmodium protein, unknown function	NA
1747	PF3D7_0711600	Pf3D7_07_v3	508474	+	136	-1.218	-2.335	-0.101	-4.154	-2.218	0.0335	0.0335	-3.551	Plasmodium RNA of unknown function RUF6	NA
2318	PF3D7_0901600	Pf3D7_09_v3	77861	+	1014	1.607	0.132	3.082	-3.391	2.215	0.0337	0.0337	-3.546	stevor	NA
5668	PF3D7_1473600	Pf3D7_14_v3	2997600	-	345	-1.069	-2.051	-0.087	0.722	-2.213	0.0338	0.0338	-3.566	conserved Plasmodium protein, unknown function	NA
3127	PF3D7_1101700	Pf3D7_11_v3	85629	+	790	1.498	0.121	2.874	-1.209	2.213	0.0339	0.0339	-3.545	Pfmc-2TM Maurer's cleft two transmembrane protein	MC-2TM
5650	PF3D7_1471800	Pf3D7_14_v3	2932023	+	765	0.733	0.059	1.407	1.519	2.211	0.034	0.034	-3.592	conserved Plasmodium protein, unknown function	NA
3137	PF3D7_1102800	Pf3D7_11_v3	131703	-	285	0.525	0.042	1.008	12.917	2.213	0.034	0.034	-4.278	early transcribed membrane protein 11.2	ETRAMP11.2
4872	PF3D7_1368400	Pf3D7_13_v3	2719490	-	1931	0.416	0.033	0.798	6.686	2.211	0.034	0.034	-3.936	conserved Plasmodium protein, unknown function	NA
4979	PF3D7_1405800	Pf3D7_14_v3	200493	-	3651	0.368	0.029	0.706	10.171	2.211	0.034	0.034	-4.143	ribosome biogenesis protein BOP1, putative	BOP1
2737	PF3D7_1004600	Pf3D7_10_v3	215717	+	4043	1.135	0.091	2.18	1.536	2.21	0.0341	0.0341	-3.617	conserved Plasmodium membrane protein, unknown function	NA
2650	PF3D7_0933900	Pf3D7_09_v3	1338175	-	1121	-0.446	-0.857	-0.035	6.906	-2.209	0.0341	0.0341	-3.939	conserved Plasmodium protein, unknown function	NA
1934	PF3D7_0730400	Pf3D7_07_v3	1304347	+	750	0.829	0.065	1.592	1.371	2.207	0.0343	0.0343	-3.616	conserved Plasmodium protein, unknown function	NA
4793	PF3D7_1360500	Pf3D7_13_v3	2413324	+	11938	-0.546	-1.049	-0.043	2.933	-2.207	0.0343	0.0343	-3.688	guanylyl cyclase beta	GCbeta
4598	PF3D7_1341000	Pf3D7_13_v3	1631333	+	74	-0.981	-1.884	-0.077	-1.418	-2.207	0.0343	0.0343	-3.553	tRNA Arginine	NA
1495	PF3D7_0619700	Pf3D7_06_v3	828199	-	2191	0.788	0.061	1.515	0.805	2.206	0.0344	0.0344	-3.589	conserved Plasmodium protein, unknown function	NA
736	PF3D7_0404000	Pf3D7_04_v3	223711	-	421	1.061	0.082	2.041	-1.341	2.203	0.0346	0.0346	-3.56	conserved Plasmodium protein, unknown function	NA
4585	PF3D7_1339700	Pf3D7_13_v3	1590510	-	5811	0.642	0.049	1.235	3.347	2.202	0.0347	0.0347	-3.73	conserved Plasmodium protein, unknown function	NA
4512	PF3D7_1332400	Pf3D7_13_v3	1337117	-	2577	-0.465	-0.894	-0.036	6.777	-2.202	0.0347	0.0347	-3.938	nucleotidyltransferase, putative	NA
2511	PF3D7_0920400	Pf3D7_09_v3	833754	+	5559	-1.015	-1.954	-0.077	3.458	-2.2	0.0348	0.0348	-3.678	conserved Plasmodium protein, unknown function	NA
5355	PF3D7_1442500	Pf3D7_14_v3	1724402	-	3012	0.626	0.047	1.205	3.48	2.2	0.0349	0.0349	-3.713	geranylgeranyl transferase type-2 subunit alpha, putative	NA
1810	PF3D7_0717900	Pf3D7_07_v3	772951	-	2314	0.787	0.059	1.514	3.806	2.198	0.035	0.035	-3.734	thioredoxin-like protein	NA
2098	PF3D7_0813300	Pf3D7_08_v3	656078	+	1553	0.282	0.021	0.544	10.314	2.198	0.035	0.035	-4.17	conserved Plasmodium protein, unknown function	NA
686	PF3D7_0324000	Pf3D7_03_v3	1005952	+	849	-0.96	-1.849	-0.071	-0.788	-2.197	0.0351	0.0351	-3.576	exported protein family 1	EPF1
4858	PF3D7_1367000	Pf3D7_13_v3	2679415	-	1011	0.59	0.043	1.137	5.362	2.194	0.0353	0.0353	-3.861	suppressor of kinetochore protein 1, putative	SKP1
1381	PF3D7_0608700	Pf3D7_06_v3	358391	+	1813	0.315	0.023	0.608	9.301	2.194	0.0353	0.0353	-4.12	T-complex protein 1 subunit zeta	CCT6
5603	PF3D7_1467100	Pf3D7_14_v3	2745815	-	1506	-0.52	-1.003	-0.038	4.698	-2.194	0.0353	0.0353	-3.783	DNA-3-methyladenine glycosylase, putative	NA
62	PF3D7_0102000	Pf3D7_01_v3	93113	-	763	-2.056	-3.961	-0.151	-1.455	-2.198	0.0353	0.0353	-3.57	Plasmodium exported protein (PHISTa), unknown function, pseudogene	NA
5501	PF3D7_1457000	Pf3D7_14_v3	2336649	-	2505	0.45	0.033	0.867	8.332	2.193	0.0354	0.0354	-4.064	signal peptide peptidase	SPP
2800	PF3D7_1010900	Pf3D7_10_v3	426601	+	1546	0.678	0.049	1.307	4.147	2.192	0.0355	0.0355	-3.767	conserved Plasmodium protein, unknown function	NA
3504	PF3D7_1138500	Pf3D7_11_v3	1518464	+	2775	-0.335	-0.647	-0.024	8.818	-2.189	0.0357	0.0357	-4.095	protein phosphatase 2C	PPM2
5561	PF3D7_1462900	Pf3D7_14_v3	2561069	-	2424	-0.48	-0.926	-0.034	4.708	-2.189	0.0357	0.0357	-3.793	conserved Plasmodium protein, unknown function	NA
769	PF3D7_0407400	Pf3D7_04_v3	367845	-	309	0.701	0.049	1.353	2.244	2.185	0.036	0.036	-3.668	conserved Plasmodium protein, unknown function	NA
5385	PF3D7_1445500	Pf3D7_14_v3	1867616	+	450	0.524	0.036	1.012	5.863	2.185	0.036	0.036	-3.928	conserved Plasmodium protein, unknown function	NA
579	PF3D7_0313600	Pf3D7_03_v3	552001	-	2621	1.011	0.07	1.952	-1.172	2.184	0.0361	0.0361	-3.597	conserved Plasmodium protein, unknown function	NA
3307	PF3D7_1119400	Pf3D7_11_v3	727896	+	6444	-0.352	-0.679	-0.024	7.683	-2.184	0.0361	0.0361	-4.031	ubiquitin-protein ligase, putative	NA
2386	PF3D7_0908000	Pf3D7_09_v3	369870	-	1685	-1.458	-2.815	-0.101	2.641	-2.189	0.0361	0.0361	-3.668	P1 nuclease, putative	NA
642	PF3D7_0319600	Pf3D7_03_v3	817913	+	783	0.442	0.03	0.855	8.268	2.182	0.0363	0.0363	-4.077	elongation factor 1 (EF-1), putative	NA
2484	PF3D7_0917700	Pf3D7_09_v3	732951	+	1077	-0.68	-1.314	-0.046	2.359	-2.181	0.0363	0.0363	-3.655	XPA binding protein 1, putative	NA
1786	PF3D7_0715500	Pf3D7_07_v3	689543	-	515	1.173	0.079	2.267	-3.906	2.18	0.0364	0.0364	-3.599	mitochondrial ATP synthase F1, epsilon subunit, putative	NA
86	PF3D7_0104400	Pf3D7_01_v3	202536	+	1608	0.544	0.037	1.052	4.411	2.18	0.0364	0.0364	-3.849	4-hydroxy-3-methylbut-2-enyl diphosphate reductase	LytB
1789	PF3D7_0715800	Pf3D7_07_v3	695600	-	1305	1.264	0.084	2.445	0.125	2.178	0.0365	0.0365	-3.624	drug/metabolite transporter, putative	DMT1
2225	PF3D7_0826100	Pf3D7_08_v3	1113369	-	25776	0.406	0.027	0.785	9.933	2.179	0.0365	0.0365	-4.187	E3 ubiquitin-protein ligase, putative	NA
1144	PF3D7_0518500	Pf3D7_05_v3	763532	-	3372	-0.47	-0.908	-0.031	8.254	-2.18	0.0365	0.0365	-4.08	ATP-dependent RNA helicase DDX23, putative	DDX23
5583	PF3D7_1465100	Pf3D7_14_v3	2637566	+	2604	-0.511	-0.988	-0.034	2.013	-2.177	0.0366	0.0366	-3.677	conserved oligomeric Golgi complex subunit 6, putative	COG6
2057	PF3D7_0809400	Pf3D7_08_v3	475573	+	2553	1.113	0.072	2.154	0.794	2.174	0.0369	0.0369	-3.646	conserved Plasmodium protein, unknown function	NA
2794	PF3D7_1010300	Pf3D7_10_v3	414732	+	597	0.518	0.034	1.003	8.217	2.175	0.0369	0.0369	-4.105	succinate dehydrogenase subunit 4, putative	SDH4
4833	PF3D7_1364500	Pf3D7_13_v3	2596389	+	1434	-0.559	-1.082	-0.036	6.049	-2.174	0.0369	0.0369	-3.931	exosome complex component RRP45, putative	RRP45
5799	PF3D7_API06700	Pf3D7_API_v3	31447	+	2692	-1.629	-3.152	-0.106	-1.053	-2.175	0.0369	0.0369	-3.602	large subunit ribosomal RNA	NA
434	PF3D7_0222600	Pf3D7_02_v3	892856	+	1351	1.507	0.096	2.919	-0.692	2.172	0.0371	0.0371	-3.615	rifin	RIF
1568	PF3D7_0626800	Pf3D7_06_v3	1078995	+	2326	0.436	0.028	0.845	11.628	2.171	0.0372	0.0372	-4.287	pyruvate kinase	PyrK
4087	PF3D7_1245900	Pf3D7_12_v3	1910963	+	936	-0.45	-0.872	-0.028	5.267	-2.17	0.0372	0.0372	-3.868	conserved Plasmodium protein, unknown function	NA
3138	PF3D7_1102900	Pf3D7_11_v3	136661	+	782	0.77	0.048	1.493	4.764	2.168	0.0374	0.0374	-3.858	Plasmodium exported protein (hyp11), unknown function	NA
5087	PF3D7_1416200	Pf3D7_14_v3	650503	-	6843	0.797	0.049	1.544	4.065	2.167	0.0375	0.0375	-3.845	metacaspase-like protein	MCA3
4516	PF3D7_1332800	Pf3D7_13_v3	1348779	+	744	-0.413	-0.801	-0.025	7.23	-2.166	0.0376	0.0376	-4.037	eukaryotic translation initiation factor 6, putative	NA
5364	PF3D7_1443400	Pf3D7_14_v3	1776958	-	2649	0.666	0.04	1.293	2.878	2.163	0.0378	0.0378	-3.751	WD repeat-containing protein	WLP1
1464	PF3D7_0616800	Pf3D7_06_v3	695929	+	1566	-0.611	-1.185	-0.037	3.441	-2.163	0.0378	0.0378	-3.78	malate:quinone oxidoreductase, putative	MQO
972	PF3D7_0501300	Pf3D7_05_v3	68930	+	1184	0.456	0.027	0.885	12.251	2.162	0.0379	0.0379	-4.338	skeleton-binding protein 1	SBP1
432	PF3D7_0222400	Pf3D7_02_v3	886625	+	1178	1.5	0.088	2.912	-1.137	2.161	0.038	0.038	-3.638	rifin, pseudogene	RIF
2881	PF3D7_1018500	Pf3D7_10_v3	735921	-	893	0.453	0.026	0.88	6.773	2.159	0.0382	0.0382	-4.04	PHF5-like protein, putative	NA
4518	PF3D7_1333000	Pf3D7_13_v3	1355285	+	1910	0.445	0.026	0.864	5.673	2.158	0.0382	0.0382	-3.962	20 kDa chaperonin	CPN20
455	PF3D7_0301300	Pf3D7_03_v3	82011	-	1505	0.503	0.029	0.976	6.804	2.157	0.0383	0.0383	-4.034	alpha/beta hydrolase, putative	NA
2714	PF3D7_1002400	Pf3D7_10_v3	121115	+	2177	0.342	0.019	0.664	10.066	2.156	0.0384	0.0384	-4.239	RNA-binding protein, putative	NA
2715	PF3D7_1002400	Pf3D7_10_v3	121115	+	2177	0.342	0.019	0.664	10.066	2.156	0.0384	0.0384	-4.239	RNA-binding protein, putative	NA
5655	PF3D7_1472300	Pf3D7_14_v3	2954108	+	3001	-0.652	-1.268	-0.036	5.375	-2.154	0.0386	0.0386	-3.896	conserved Plasmodium membrane protein, unknown function	NA
4178	PF3D7_1254900	Pf3D7_12_v3	2232691	+	213	1.07	0.059	2.082	-4.131	2.153	0.0387	0.0387	-3.64	Plasmodium exported protein, unknown function, fragment	NA
4574	PF3D7_1338600	Pf3D7_13_v3	1556659	-	3076	0.91	0.05	1.77	-0.747	2.152	0.0387	0.0387	-3.652	conserved Plasmodium protein, unknown function	NA
765	PF3D7_0407000	Pf3D7_04_v3	360547	-	1218	-0.525	-1.02	-0.029	5.538	-2.152	0.0387	0.0387	-3.931	conserved Plasmodium protein, unknown function	NA
2745	PF3D7_1005400	Pf3D7_10_v3	234795	-	951	-0.879	-1.711	-0.048	-2.169	-2.15	0.0389	0.0389	-3.639	conserved Plasmodium protein, unknown function	NA
5542	PF3D7_1461000	Pf3D7_14_v3	2482775	+	2312	1.511	0.079	2.943	-1.808	2.146	0.0393	0.0393	-3.649	conserved Plasmodium protein, unknown function	NA
3285	PF3D7_1117300	Pf3D7_11_v3	662000	+	387	-0.551	-1.074	-0.029	5.039	-2.146	0.0393	0.0393	-3.891	conserved Plasmodium protein, unknown function	NA
5731	PF3D7_1480000	Pf3D7_14_v3	3285900	+	1104	1.326	0.068	2.583	0.683	2.144	0.0394	0.0394	-3.695	rifin	RIF
1444	PF3D7_0614800	Pf3D7_06_v3	615297	-	1314	1.29	0.062	2.517	1.395	2.138	0.04	0.04	-3.724	endonuclease III homologue, putative	NA
4550	PF3D7_1336200	Pf3D7_13_v3	1474274	+	1388	0.912	0.044	1.78	3.191	2.136	0.0401	0.0401	-3.821	conserved Plasmodium protein, unknown function	NA
1073	PF3D7_0511500	Pf3D7_05_v3	486602	+	30186	0.497	0.024	0.971	10.172	2.136	0.0401	0.0401	-4.277	RNA pseudouridylate synthase, putative	NA
5472	PF3D7_1454200	Pf3D7_14_v3	2222490	-	4215	-0.573	-1.118	-0.027	5.333	-2.135	0.0402	0.0402	-3.943	conserved Plasmodium protein, unknown function	NA
1846	PF3D7_0721600	Pf3D7_07_v3	931459	-	706	0.361	0.017	0.705	10.37	2.134	0.0403	0.0403	-4.291	40S ribosomal protein S5, putative	NA
3402	PF3D7_1128900	Pf3D7_11_v3	1118249	+	2437	0.891	0.041	1.742	-0.377	2.131	0.0406	0.0406	-3.703	conserved Plasmodium protein, unknown function	NA
727	PF3D7_0403100	Pf3D7_04_v3	175372	-	1881	0.724	0.033	1.415	3.143	2.131	0.0406	0.0406	-3.818	regulator of chromosome condensation, putative	NA
3987	PF3D7_1235900	Pf3D7_12_v3	1497687	-	3725	-0.426	-0.834	-0.019	8.288	-2.127	0.0409	0.0409	-4.18	pre-mRNA-splicing factor SYF1, putative	XAB2
2591	PF3D7_0928100	Pf3D7_09_v3	1136966	-	1218	-0.654	-1.28	-0.029	2.286	-2.127	0.0409	0.0409	-3.784	conserved Plasmodium protein, unknown function	NA
1112	PF3D7_0515300	Pf3D7_05_v3	628981	+	6402	-0.574	-1.123	-0.024	6.447	-2.124	0.0412	0.0412	-4.059	phosphatidylinositol 3-kinase	PI3K
5451	PF3D7_1452100	Pf3D7_14_v3	2141662	+	1017	-0.653	-1.278	-0.028	3.078	-2.124	0.0412	0.0412	-3.789	leucine-rich repeat protein	LRR3
4974	PF3D7_1405300	Pf3D7_14_v3	181955	+	3078	-0.796	-1.559	-0.033	3.308	-2.123	0.0413	0.0413	-3.796	conserved Plasmodium protein, unknown function	NA
1572	PF3D7_0627100	Pf3D7_06_v3	1089190	+	5139	-0.521	-1.02	-0.022	8.705	-2.122	0.0414	0.0414	-4.209	ankyrin-repeat protein, putative	NA
223	PF3D7_0202200	Pf3D7_02_v3	112547	-	1136	0.366	0.015	0.717	9.411	2.119	0.0416	0.0416	-4.27	EMP1-trafficking protein	PTP1
4426	PF3D7_1324000	Pf3D7_13_v3	990899	-	4380	-0.506	-0.992	-0.02	6.952	-2.118	0.0417	0.0417	-4.106	conserved Plasmodium protein, unknown function	NA
252	PF3D7_0205000	Pf3D7_02_v3	212982	-	1527	-0.86	-1.687	-0.034	1.41	-2.118	0.0417	0.0417	-3.778	conserved Plasmodium protein, unknown function	NA
249	PF3D7_0204700	Pf3D7_02_v3	205889	-	1515	-0.405	-0.794	-0.016	7.811	-2.116	0.0419	0.0419	-4.161	hexose transporter	HT
1793	PF3D7_0716200	Pf3D7_07_v3	712469	+	2499	-0.41	-0.803	-0.016	9.724	-2.115	0.042	0.042	-4.29	conserved Plasmodium protein, unknown function	NA
2017	PF3D7_0805400	Pf3D7_08_v3	303370	-	1227	0.559	0.021	1.096	5.263	2.112	0.0422	0.0422	-4.013	acetyltransferase, putative	NA
4779	PF3D7_1359100	Pf3D7_13_v3	2347863	-	2124	-0.452	-0.887	-0.017	5.813	-2.112	0.0423	0.0423	-4.031	riboflavin kinase / FAD synthase family protein, putative	NA
3065	PF3D7_1036700	Pf3D7_10_v3	1445916	-	1580	0.796	0.029	1.564	2.25	2.111	0.0424	0.0424	-3.808	phosducin-like protein, putative	PhLP2
349	PF3D7_0214400	Pf3D7_02_v3	586765	-	2287	-0.315	-0.619	-0.011	9.074	-2.11	0.0425	0.0425	-4.261	conserved Plasmodium protein, unknown function	NA
5282	PF3D7_1435300	Pf3D7_14_v3	1421901	-	9321	-0.581	-1.141	-0.021	3.339	-2.109	0.0425	0.0425	-3.897	NAD(P)H-dependent glutamate synthase, putative	NA
1026	PF3D7_0506800	Pf3D7_05_v3	284691	+	3333	-0.394	-0.775	-0.014	7.58	-2.108	0.0427	0.0427	-4.162	transcription factor 25, putative	TCF25
1664	PF3D7_0703500	Pf3D7_07_v3	135606	+	6900	0.477	0.016	0.938	10.286	2.105	0.0429	0.0429	-4.352	erythrocyte membrane-associated antigen	NA
3819	PF3D7_1219100	Pf3D7_12_v3	757649	+	5994	-0.408	-0.803	-0.014	8.391	-2.104	0.043	0.043	-4.223	clathrin heavy chain, putative	NA
170	PF3D7_0112700	Pf3D7_01_v3	477279	+	4104	-1.475	-2.901	-0.048	7.045	-2.119	0.0432	0.0432	-4.104	28S ribosomal RNA	NA
5378	PF3D7_1444800	Pf3D7_14_v3	1844041	-	1577	0.44	0.013	0.867	10.505	2.098	0.0436	0.0436	-4.373	fructose-bisphosphate aldolase	FBPA
3667	PF3D7_1204100	Pf3D7_12_v3	198970	-	3270	-0.577	-1.138	-0.017	5.884	-2.095	0.0438	0.0438	-4.137	conserved Plasmodium protein, unknown function	NA
1446	PF3D7_0615000	Pf3D7_06_v3	622272	+	441	-0.544	-1.072	-0.015	5.487	-2.093	0.044	0.044	-4.024	conserved Plasmodium protein, unknown function	NA
2927	PF3D7_1023000	Pf3D7_10_v3	961066	-	1242	-0.585	-1.153	-0.017	2.229	-2.093	0.044	0.044	-3.804	conserved Plasmodium membrane protein, unknown function	NA
1692	PF3D7_0706300	Pf3D7_07_v3	305563	+	470	0.517	0.014	1.019	5.826	2.091	0.0442	0.0442	-4.109	conserved Plasmodium protein, unknown function	NA
4308	PF3D7_1312400	Pf3D7_13_v3	521050	+	3387	1.12	0.029	2.211	-1.828	2.088	0.0445	0.0445	-3.733	translation initiation factor IF-2, putative	IF2a
5367	PF3D7_1443700	Pf3D7_14_v3	1791911	-	1094	-0.658	-1.299	-0.017	0.265	-2.088	0.0445	0.0445	-3.769	dephospho-CoA kinase, putative	DPCK
5495	PF3D7_1456400	Pf3D7_14_v3	2309181	-	3292	1.492	0.036	2.948	-1.909	2.085	0.0449	0.0449	-3.738	conserved Plasmodium protein, unknown function	NA
2060	PF3D7_0809700	Pf3D7_08_v3	499463	-	2107	1.34	0.032	2.648	-2.634	2.083	0.045	0.045	-3.739	RuvB-like helicase 1	RUVB1
5360	PF3D7_1443000	Pf3D7_14_v3	1764316	-	3807	-0.797	-1.576	-0.019	1.165	-2.083	0.045	0.045	-3.814	serine/threonine protein kinase	SRPK2
3383	PF3D7_1127000	Pf3D7_11_v3	1056198	-	1857	1.755	0.04	3.47	7.979	2.1	0.0452	0.0452	-4.241	protein phosphatase, putative	NA
4209	PF3D7_1302800	Pf3D7_13_v3	150783	-	853	0.329	0.006	0.652	9.713	2.074	0.0459	0.0459	-4.36	40S ribosomal protein S7, putative	NA
2393	PF3D7_0908600	Pf3D7_09_v3	399202	-	1524	-0.377	-0.747	-0.007	6.41	-2.07	0.0463	0.0463	-4.153	ribosomal RNA methyltransferase, putative	NA
4710	PF3D7_1352100	Pf3D7_13_v3	2076078	-	3150	0.571	0.01	1.131	5.486	2.069	0.0464	0.0464	-4.106	ABC transporter B family member 6, putative	ABCB6
4444	PF3D7_1325800	Pf3D7_13_v3	1071146	+	4602	0.872	0.014	1.729	1.903	2.068	0.0465	0.0465	-3.865	conserved Plasmodium protein, unknown function	NA
753	PF3D7_0405700	Pf3D7_04_v3	305746	-	7248	1.314	0.021	2.606	2.524	2.073	0.0466	0.0466	-3.918	lysine decarboxylase, putative	NA
2250	PF3D7_0828600	Pf3D7_08_v3	1229899	-	2234	1.088	0.017	2.158	-3.24	2.066	0.0467	0.0467	-3.76	folate transporter 1	FT1
825	PF3D7_0412900	Pf3D7_04_v3	576810	-	7859	0.796	0.012	1.581	3.624	2.066	0.0467	0.0467	-3.988	erythrocyte membrane protein 1, PfEMP1	VAR
5048	PF3D7_1412400	Pf3D7_14_v3	493971	-	10375	-0.397	-0.789	-0.005	7.027	-2.062	0.0471	0.0471	-4.218	conserved Plasmodium protein, unknown function	NA
3637	PF3D7_1201200	Pf3D7_12_v3	89934	+	816	0.366	0.005	0.727	9.22	2.06	0.0473	0.0473	-4.374	Plasmodium exported protein (PHISTa-like), unknown function	NA
1079	PF3D7_0512100	Pf3D7_05_v3	528846	-	564	0.748	0.009	1.487	1.696	2.059	0.0474	0.0474	-3.869	conserved Plasmodium protein, unknown function	NA
5387	PF3D7_1445700	Pf3D7_14_v3	1875421	-	1454	0.292	0.003	0.581	9.279	2.058	0.0475	0.0475	-4.374	conserved Plasmodium protein, unknown function	NA
1520	PF3D7_0622100	Pf3D7_06_v3	898341	-	4023	0.495	0.005	0.984	4.897	2.056	0.0476	0.0476	-4.084	conserved Plasmodium protein, unknown function	NA
4395	PF3D7_1321000	Pf3D7_13_v3	859299	+	2049	-0.94	-1.869	-0.011	-0.504	-2.057	0.0476	0.0476	-3.791	conserved Plasmodium protein, unknown function	NA
651	PF3D7_0320500	Pf3D7_03_v3	860813	+	1290	1.345	0.014	2.676	3.169	2.063	0.0478	0.0478	-3.979	nicotinamidase, putative	Nico
2385	PF3D7_0907900	Pf3D7_09_v3	367865	-	925	0.702	0.007	1.397	3.536	2.055	0.0478	0.0478	-3.996	peptide deformylase	PDF
5094	PF3D7_1416900	Pf3D7_14_v3	685437	-	932	0.744	0.007	1.48	2.413	2.054	0.0479	0.0479	-3.896	prefoldin subunit 2, putative	NA
284	PF3D7_0208100	Pf3D7_02_v3	327932	+	7272	0.505	0.005	1.005	2.638	2.053	0.0479	0.0479	-3.914	conserved Plasmodium protein, unknown function	NA
4711	PF3D7_1352200	Pf3D7_13_v3	2080764	+	2389	0.398	0.004	0.792	8.231	2.053	0.0479	0.0479	-4.328	U3 small nucleolar RNA-associated protein 15, putative	UTP15
653	PF3D7_0320700	Pf3D7_03_v3	865014	+	1407	1.146	0.01	2.282	0.304	2.052	0.048	0.048	-3.834	signal peptidase complex subunit SPC2, putative	SPC2
3631	PF3D7_1200600	Pf3D7_12_v3	46788	-	10018	0.978	0.008	1.947	5.202	2.058	0.0481	0.0481	-4.166	erythrocyte membrane protein 1, PfEMP1	VAR2CSA
2179	PF3D7_0821500	Pf3D7_08_v3	967901	-	840	-0.448	-0.892	-0.004	6.184	-2.051	0.0482	0.0482	-4.16	ribosomal RNA small subunit methyltransferase NEP1, putative	NEP1
4384	PF3D7_1319900	Pf3D7_13_v3	822078	-	4470	-0.912	-1.816	-0.007	2.634	-2.049	0.0484	0.0484	-3.919	conserved Plasmodium protein, unknown function	NA
5781	PF3D7_API04900	Pf3D7_API_v3	24053	-	2696	-1.436	-2.862	-0.011	-0.476	-2.049	0.0484	0.0484	-3.795	large subunit ribosomal RNA	NA
3558	PF3D7_1143800	Pf3D7_11_v3	1748439	+	2700	-0.35	-0.697	-0.002	7.376	-2.048	0.0485	0.0485	-4.266	conserved Plasmodium protein, unknown function	NA
1514	PF3D7_0621500	Pf3D7_06_v3	881963	+	1032	-0.573	-1.142	-0.004	2.472	-2.047	0.0486	0.0486	-3.887	ribonuclease P/MRP protein subunit RPP1, putative	RPP1
3091	PF3D7_1039200	Pf3D7_10_v3	1576441	-	551	1.378	0.009	2.748	-1.609	2.047	0.0487	0.0487	-3.792	Plasmodium exported protein, unknown function, pseudogene	NA
2519	PF3D7_0921100	Pf3D7_09_v3	861392	+	1393	1.057	0.006	2.108	0.981	2.046	0.0487	0.0487	-3.845	conserved Plasmodium protein, unknown function	NA
2310	PF3D7_0900800	Pf3D7_09_v3	52648	-	1373	1.492	0.008	2.976	0.805	2.05	0.0488	0.0488	-3.872	erythrocyte membrane protein 1 (PfEMP1), exon 2, pseudogene	VAR
3436	PF3D7_1132100	Pf3D7_11_v3	1243226	-	3393	-0.601	-1.2	-0.003	3.338	-2.044	0.049	0.049	-4.027	RNA-binding protein, putative	NA
4467	PF3D7_1328100	Pf3D7_13_v3	1184208	+	813	-0.392	-0.783	-0.002	6.996	-2.042	0.0491	0.0491	-4.239	proteasome subunit beta type-7, putative	NA
2783	PF3D7_1009200	Pf3D7_10_v3	374864	+	2748	-0.661	-1.319	-0.002	6.28	-2.041	0.0493	0.0493	-4.178	small subunit rRNA synthesis-associated protein, putative	NA
5180	PF3D7_1425300	Pf3D7_14_v3	985365	-	2391	1.451	0.004	2.898	-1.051	2.039	0.0494	0.0494	-3.816	conserved Plasmodium protein, unknown function	NA
5108	PF3D7_1418300	Pf3D7_14_v3	776672	+	411	0.712	0.002	1.422	2.343	2.038	0.0495	0.0495	-3.937	calmodulin, putative	NA
3604	PF3D7_1148600	Pf3D7_11_v3	1925995	+	2150	-1.374	-2.748	-0.001	1.941	-2.037	0.0499	0.0499	-3.883	18S ribosomal RNA	NA
4173	PF3D7_1254400	Pf3D7_12_v3	2214671	+	1349	-1.267	-2.534	0	0.203	-2.034	0.05	0.05	-3.839	rifin	RIF
4511	PF3D7_1332300	Pf3D7_13_v3	1336401	+	492	-0.49	-0.981	0	4.065	-2.032	0.0502	0.0502	-4.025	trafficking protein particle complex subunit 2, putative	TRAPPC2
2630	PF3D7_0931900	Pf3D7_09_v3	1275268	-	1217	1.185	-0.002	2.371	0.571	2.031	0.0503	0.0503	-3.881	adenylate kinase-like protein 2	AKLP2
5209	PF3D7_1428100	Pf3D7_14_v3	1098038	-	1914	-0.446	-0.893	0.001	5.046	-2.031	0.0503	0.0503	-4.091	WW domain-binding protein 11, putative	NA
4002	PF3D7_1237400	Pf3D7_12_v3	1558909	+	1715	-0.735	-1.472	0.001	5.53	-2.031	0.0503	0.0503	-4.145	conserved Plasmodium protein, unknown function	NA
5305	PF3D7_1437500	Pf3D7_14_v3	1521105	+	816	-0.642	-1.286	0.002	4.524	-2.027	0.0507	0.0507	-4.072	conserved Plasmodium membrane protein, unknown function	NA
4977	PF3D7_1405600	Pf3D7_14_v3	193216	-	1050	0.716	-0.003	1.434	3.02	2.026	0.0508	0.0508	-4.002	ribonucleoside-diphosphate reductase small chain, putative	RNR
4160	PF3D7_1253100	Pf3D7_12_v3	2171342	+	1008	0.384	-0.001	0.769	7.122	2.026	0.0508	0.0508	-4.297	Plasmodium exported protein (PHISTa), unknown function	NA
5676	PF3D7_1474500	Pf3D7_14_v3	3055715	-	2106	-0.538	-1.077	0.002	6.408	-2.027	0.0508	0.0508	-4.216	splicing factor 3A subunit 1, putative	SF3A1
5659	PF3D7_1472700	Pf3D7_14_v3	2966749	+	2586	-1.09	-2.184	0.004	-2.29	-2.026	0.0508	0.0508	-3.821	DNA-directed RNA polymerase, alpha subunit, putative	NA
1439	PF3D7_0614300	Pf3D7_06_v3	597484	-	3034	0.49	-0.002	0.983	8.452	2.024	0.051	0.051	-4.388	major facilitator superfamily-related transporter, putative	MFR1
2453	PF3D7_0914600	Pf3D7_09_v3	627754	+	566	-0.437	-0.877	0.002	4.86	-2.022	0.0512	0.0512	-4.105	transcription elongation factor 1, putative	ELF1
2387	PF3D7_0908100	Pf3D7_09_v3	373762	-	1825	-1.175	-2.358	0.007	-1.14	-2.022	0.0512	0.0512	-3.836	conserved Plasmodium membrane protein, unknown function	NA
945	PF3D7_0424800	Pf3D7_04_v3	1123986	+	1019	0.692	-0.005	1.39	6.748	2.02	0.0517	0.0517	-4.302	Plasmodium exported protein (PHISTb), unknown function	NA
4757	PF3D7_1356900	Pf3D7_13_v3	2263199	-	1557	0.599	-0.005	1.203	4.938	2.018	0.0517	0.0517	-4.183	protein kinase 5	PK5
1803	PF3D7_0717200	Pf3D7_07_v3	745191	-	1473	0.556	-0.004	1.116	5.629	2.018	0.0517	0.0517	-4.197	conserved Plasmodium protein, unknown function	NA
4563	PF3D7_1337500	Pf3D7_13_v3	1509589	-	10005	0.891	-0.007	1.79	7.883	2.026	0.0518	0.0518	-4.355	conserved Plasmodium protein, unknown function	NA
3430	PF3D7_1131500	Pf3D7_11_v3	1210686	-	771	1.053	-0.009	2.115	-3.922	2.016	0.0519	0.0519	-3.829	conserved Plasmodium protein, unknown function	NA
2330	PF3D7_0902800	Pf3D7_09_v3	121621	-	3386	0.936	-0.009	1.881	0.959	2.014	0.0521	0.0521	-3.942	serine repeat antigen 9	SERA9
3983	PF3D7_1235500	Pf3D7_12_v3	1481002	+	1941	-0.413	-0.83	0.004	5.998	-2.014	0.0522	0.0522	-4.22	mRNA methyltransferase, putative	NA
3057	PF3D7_1035800	Pf3D7_10_v3	1420533	+	2139	1.042	-0.011	2.095	7.873	2.024	0.0523	0.0523	-4.354	probable protein, unknown function	M712
1517	PF3D7_0621800	Pf3D7_06_v3	891997	+	781	0.326	-0.004	0.656	9.549	2.011	0.0525	0.0525	-4.471	nascent polypeptide-associated complex subunit alpha, putative	NA
4766	PF3D7_1357800	Pf3D7_13_v3	2291897	+	2238	0.249	-0.003	0.501	9.47	2.011	0.0525	0.0525	-4.47	T-complex protein 1 subunit delta	CCT4
3216	PF3D7_1110600	Pf3D7_11_v3	425904	-	961	0.802	-0.01	1.613	0.318	2.01	0.0526	0.0526	-3.91	mitochondrial ribosomal protein L11 precursor, putative	NA
1908	PF3D7_0727900	Pf3D7_07_v3	1184401	+	5772	-0.48	-0.965	0.006	5.648	-2.01	0.0526	0.0526	-4.189	conserved Plasmodium protein, unknown function	NA
4708	PF3D7_1351900	Pf3D7_13_v3	2067529	-	1239	0.406	-0.005	0.817	8.33	2.009	0.0527	0.0527	-4.408	conserved Plasmodium protein, unknown function	NA
3380	PF3D7_1126700	Pf3D7_11_v3	1040790	-	5298	0.824	-0.011	1.66	0.808	2.007	0.0529	0.0529	-3.918	autophagy-related protein 23, putative	ATG23
1796	PF3D7_0716500	Pf3D7_07_v3	721717	+	2999	0.777	-0.01	1.564	2.298	2.007	0.0529	0.0529	-3.979	conserved Plasmodium protein, unknown function	NA
1340	PF3D7_0604700	Pf3D7_06_v3	204640	-	1568	0.847	-0.013	1.708	0.232	2.003	0.0534	0.0534	-3.915	glyoxalase I	GILP
5633	PF3D7_1470100	Pf3D7_14_v3	2870069	+	7521	0.444	-0.007	0.895	6.165	2.002	0.0534	0.0534	-4.265	conserved Plasmodium protein, unknown function	NA
798	PF3D7_0410200	Pf3D7_04_v3	469858	-	73	-1.127	-2.271	0.018	-2.223	-2.002	0.0535	0.0535	-3.85	tRNA Isoleucine	NA
2895	PF3D7_1019800	Pf3D7_10_v3	804328	-	3255	0.927	-0.015	1.869	1.731	2.001	0.0536	0.0536	-3.967	tRNA methyltransferase, putative	NA
5441	PF3D7_1451100	Pf3D7_14_v3	2090902	+	2499	0.355	-0.006	0.715	12.335	2.001	0.0536	0.0536	-4.641	elongation factor 2	eEF2
4493	PF3D7_1330500	Pf3D7_13_v3	1284988	+	2178	-0.692	-1.395	0.011	3.761	-2.001	0.0536	0.0536	-4.069	conserved Plasmodium protein, unknown function	NA
4736	PF3D7_1354700	Pf3D7_13_v3	2178639	-	1224	-0.688	-1.388	0.012	0.531	-2	0.0538	0.0538	-3.908	conserved Plasmodium protein, unknown function	NA
3569	PF3D7_1144900	Pf3D7_11_v3	1777525	-	1404	-0.397	-0.801	0.007	4.923	-1.997	0.054	0.054	-4.154	ras-related protein Rab-6	RAB6
317	PF3D7_0211200	Pf3D7_02_v3	455579	-	708	1.197	-0.023	2.417	-0.515	1.996	0.0542	0.0542	-3.883	ras-related protein Rab-5A	RAB5a
2355	PF3D7_0905200	Pf3D7_09_v3	245261	-	3600	-0.431	-0.871	0.008	7.224	-1.995	0.0542	0.0542	-4.35	mitochondrial carrier protein, putative	NA
5637	PF3D7_1470500	Pf3D7_14_v3	2882766	+	3317	-0.526	-1.062	0.011	2.404	-1.993	0.0545	0.0545	-4.057	phosphodiesterase delta, putative	PDEdelta
595	PF3D7_0315000	Pf3D7_03_v3	611334	+	681	0.671	-0.014	1.357	1.983	1.992	0.0546	0.0546	-3.994	zinc finger protein, putative	NA
3615	PF3D7_1149400	Pf3D7_11_v3	1985870	-	770	0.958	-0.021	1.936	1.735	1.99	0.0548	0.0548	-3.992	Plasmodium exported protein, unknown function	NA
4948	PF3D7_1402900	Pf3D7_14_v3	106370	+	2865	-0.663	-1.34	0.015	1.369	-1.989	0.055	0.055	-3.969	conserved Plasmodium protein, unknown function	NA
2052	PF3D7_0808900	Pf3D7_08_v3	453803	+	1117	1.839	-0.044	3.722	-2.287	1.99	0.0552	0.0552	-3.875	rifin	RIF
2708	PF3D7_1001800	Pf3D7_10_v3	96113	-	919	0.473	-0.011	0.957	6.932	1.987	0.0552	0.0552	-4.369	Plasmodium exported protein (PHISTc), unknown function	NA
3980	PF3D7_1235200	Pf3D7_12_v3	1464219	-	3354	-0.818	-1.656	0.019	1.001	-1.987	0.0552	0.0552	-3.972	V-type K+-independent H+-translocating inorganic pyrophosphatase	VP2
2962	PF3D7_1026500	Pf3D7_10_v3	1112423	-	213	1.309	-0.032	2.65	-2.512	1.986	0.0553	0.0553	-3.877	conserved Plasmodium protein, unknown function	NA
3690	PF3D7_1206500	Pf3D7_12_v3	292424	+	1956	0.803	-0.019	1.626	0.477	1.986	0.0553	0.0553	-3.93	Tat binding protein 1(TBP-1)-interacting protein, putative	NA
4992	PF3D7_1407100	Pf3D7_14_v3	258746	+	1243	0.321	-0.008	0.649	8.993	1.986	0.0553	0.0553	-4.493	rRNA 2'-O-methyltransferase fibrillarin, putative	NOP1
2908	PF3D7_1021100	Pf3D7_10_v3	851000	-	5286	-0.513	-1.038	0.012	6.239	-1.986	0.0553	0.0553	-4.282	conserved Plasmodium protein, unknown function	NA
5074	PF3D7_1414900	Pf3D7_14_v3	601981	-	3579	0.684	-0.017	1.386	3.441	1.985	0.0555	0.0555	-4.085	ATP-dependent protease, putative	NA
107	PF3D7_0106400	Pf3D7_01_v3	272454	+	951	0.358	-0.009	0.726	7.338	1.984	0.0555	0.0555	-4.387	pre-rRNA-processing protein TSR2, putative	NA
3024	PF3D7_1032500	Pf3D7_10_v3	1306241	-	1292	-0.598	-1.21	0.015	4.277	-1.984	0.0556	0.0556	-4.141	DER1-like protein, putative	Der1-2
3619	PF3D7_1149800	Pf3D7_11_v3	2006706	+	1124	1.848	-0.05	3.745	-2.894	1.983	0.0559	0.0559	-3.879	rifin	RIF
4892	PF3D7_1370500	Pf3D7_13_v3	2794237	+	615	1.565	-0.042	3.171	5.282	1.996	0.0559	0.0559	-4.303	unspecified product	NA
2300	PF3D7_0833300	Pf3D7_08_v3	1429330	+	1185	0.89	-0.024	1.803	2.875	1.98	0.056	0.056	-4.086	erythrocyte membrane protein 1 (PfEMP1), exon 2, pseudogene	NA
3999	PF3D7_1237100	Pf3D7_12_v3	1540766	-	8379	0.525	-0.014	1.064	5.965	1.98	0.056	0.056	-4.299	conserved Plasmodium protein, unknown function	NA
3391	PF3D7_1127800	Pf3D7_11_v3	1077288	-	4263	-0.408	-0.828	0.011	7.31	-1.98	0.056	0.056	-4.376	conserved Plasmodium protein, unknown function	NA
1927	PF3D7_0729700	Pf3D7_07_v3	1260154	-	2627	-0.96	-1.947	0.026	-1.535	-1.979	0.0561	0.0561	-3.893	conserved Plasmodium protein, unknown function	NA
5627	PF3D7_1469500	Pf3D7_14_v3	2847235	-	2064	-0.682	-1.384	0.02	2.876	-1.977	0.0564	0.0564	-4.016	conserved Plasmodium protein, unknown function	NA
4663	PF3D7_1347500	Pf3D7_13_v3	1897983	-	1380	0.276	-0.008	0.56	12.279	1.974	0.0567	0.0567	-4.692	DNA/RNA-binding protein Alba 4	ALBA4
1053	PF3D7_0509500	Pf3D7_05_v3	401437	+	1335	-0.873	-1.772	0.026	2.812	-1.974	0.0567	0.0567	-4.031	ERCC4 domain-containing protein, putative	NA
4220	PF3D7_1303800	Pf3D7_13_v3	184845	-	27816	0.81	-0.025	1.644	1.164	1.973	0.0568	0.0568	-3.978	conserved Plasmodium protein, unknown function	NA
5629	PF3D7_1469700	Pf3D7_14_v3	2863914	+	618	1.054	-0.033	2.141	-1.664	1.971	0.057	0.057	-3.905	mediator of RNA polymerase II transcription subunit 6, putative	MED6
357	PF3D7_0215200	Pf3D7_02_v3	626976	+	735	0.781	-0.026	1.588	2.977	1.969	0.0573	0.0573	-4.086	conserved Plasmodium protein, unknown function	NA
2117	PF3D7_0815300	Pf3D7_08_v3	721928	+	3549	-0.531	-1.08	0.017	3.011	-1.969	0.0573	0.0573	-4.078	FAD-dependent monooxygenase, putative	NA
2443	PF3D7_0913600	Pf3D7_09_v3	584726	+	3696	-0.961	-1.953	0.032	1.868	-1.969	0.0573	0.0573	-4.027	conserved Plasmodium protein, unknown function	NA
3213	PF3D7_1110300	Pf3D7_11_v3	410202	-	1154	0.342	-0.012	0.695	7.043	1.967	0.0576	0.0576	-4.396	conserved Plasmodium protein, unknown function	NA
5039	PF3D7_1411500	Pf3D7_14_v3	468976	+	3041	-0.403	-0.82	0.014	7.641	-1.966	0.0577	0.0577	-4.436	conserved Plasmodium protein, unknown function	NA
299	PF3D7_0209500	Pf3D7_02_v3	391275	-	1515	-0.673	-1.37	0.024	1.781	-1.965	0.0579	0.0579	-4.097	conserved Plasmodium protein, unknown function	NA
939	PF3D7_0424200	Pf3D7_04_v3	1085979	-	5299	1.056	-0.038	2.15	1.091	1.964	0.058	0.058	-3.983	reticulocyte binding protein homologue 4	RH4
3596	PF3D7_1147700	Pf3D7_11_v3	1897204	+	681	1.233	-0.045	2.511	-1.326	1.963	0.0581	0.0581	-3.921	mitochondrial ATP synthase delta subunit, putative	NA
537	PF3D7_0309500	Pf3D7_03_v3	402933	+	2508	0.344	-0.013	0.7	10.045	1.961	0.0583	0.0583	-4.588	asparagine synthetase [glutamine-hydrolyzing], putative	AS
4456	PF3D7_1327000	Pf3D7_13_v3	1134070	-	3971	-0.46	-0.936	0.017	6.096	-1.961	0.0583	0.0583	-4.312	conserved Plasmodium protein, unknown function	NA
5532	PF3D7_1460100	Pf3D7_14_v3	2454902	+	978	-0.565	-1.15	0.021	4.193	-1.961	0.0583	0.0583	-4.168	FYVE and coiled-coil domain-containing protein	FCP
1147	PF3D7_0518800	Pf3D7_05_v3	783638	-	1354	1.405	-0.054	2.864	-2.536	1.958	0.0586	0.0586	-3.914	secreted ookinete protein, putative	PSOP13
363	PF3D7_0215800	Pf3D7_02_v3	650663	-	2700	0.806	-0.031	1.643	0.864	1.958	0.0587	0.0587	-4.022	origin recognition complex subunit 5	ORC5
1172	PF3D7_0521300	Pf3D7_05_v3	870184	-	4387	-0.411	-0.838	0.016	8.231	-1.957	0.0588	0.0588	-4.489	conserved Plasmodium protein, unknown function	NA
4024	PF3D7_1239600	Pf3D7_12_v3	1652936	-	909	0.726	-0.029	1.48	0.343	1.956	0.0589	0.0589	-3.984	hydroxyethylthiazole kinase	ThzK
2213	PF3D7_0824900	Pf3D7_08_v3	1080055	-	2937	-0.417	-0.851	0.017	7.687	-1.954	0.0591	0.0591	-4.457	conserved Plasmodium protein, unknown function	NA
3226	PF3D7_1111600	Pf3D7_11_v3	448912	+	2787	-0.627	-1.281	0.026	2.401	-1.953	0.0592	0.0592	-4.083	endonuclease/exonuclease/phosphatase family protein, putative	NA
3193	PF3D7_1108300	Pf3D7_11_v3	362421	+	467	-0.79	-1.613	0.032	1.471	-1.953	0.0592	0.0592	-3.982	pterin-4a-carbinolamine dehydratase	PCD
1293	PF3D7_0533100	Pf3D7_05_v3	1333470	+	9495	-1.227	-2.506	0.051	6.011	-1.964	0.0592	0.0592	-4.314	erythrocyte membrane protein 1 (PfEMP1), pseudogene	VAR1CSA
5709	PF3D7_1477800	Pf3D7_14_v3	3207627	+	273	1.373	-0.058	2.804	0.152	1.953	0.0595	0.0595	-3.981	acyl-CoA binding protein	ACBP
1037	PF3D7_0507900	Pf3D7_05_v3	327656	+	661	-0.401	-0.819	0.017	5.067	-1.949	0.0598	0.0598	-4.244	conserved Plasmodium protein, unknown function	NA
461	PF3D7_0301900	Pf3D7_03_v3	105913	-	1197	0.838	-0.037	1.713	1.169	1.948	0.0599	0.0599	-4.043	conserved Plasmodium protein, unknown function	NA
3183	PF3D7_1107300	Pf3D7_11_v3	301283	-	10005	0.358	-0.016	0.732	11.24	1.947	0.06	0.06	-4.687	polyadenylate-binding protein-interacting protein 1, putative	PAIP1
1297	PF3D7_0600400	Pf3D7_06_v3	18586	-	4136	1.503	-0.068	3.074	2.554	1.954	0.0601	0.0601	-4.118	erythrocyte membrane protein 1, PfEMP1	VAR
2138	PF3D7_0817400	Pf3D7_08_v3	794287	-	3520	0.795	-0.036	1.627	1.105	1.946	0.0601	0.0601	-4.009	phosphatase, putative	NA
4270	PF3D7_1308700	Pf3D7_13_v3	401577	+	1824	1.072	-0.049	2.192	0.418	1.945	0.0602	0.0602	-4.019	conserved Plasmodium protein, unknown function	NA
5517	PF3D7_1458600	Pf3D7_14_v3	2406668	+	3492	-0.445	-0.91	0.021	7.213	-1.943	0.0605	0.0605	-4.441	conserved Plasmodium protein, unknown function	NA
5524	PF3D7_1459300	Pf3D7_14_v3	2432177	+	570	0.518	-0.024	1.061	2.446	1.942	0.0606	0.0606	-4.088	OPA3-like protein, putative	NA
3190	PF3D7_1108000	Pf3D7_11_v3	352556	+	1707	-0.34	-0.696	0.016	8.932	-1.942	0.0606	0.0606	-4.551	IWS1-like protein, putative	NA
3399	PF3D7_1128500	Pf3D7_11_v3	1107786	+	2157	-0.399	-0.818	0.019	5.591	-1.942	0.0606	0.0606	-4.303	conserved protein, unknown function	NA
5694	PF3D7_1476300	Pf3D7_14_v3	3139140	+	1843	2.165	-0.104	4.435	-0.15	1.952	0.0607	0.0607	-4.006	Plasmodium exported protein (PHISTb), unknown function	NA
565	PF3D7_0312200	Pf3D7_03_v3	516793	-	3711	-1.165	-2.386	0.056	-0.502	-1.941	0.0608	0.0608	-3.957	tetratricopeptide repeat protein, putative	NA
2142	PF3D7_0817800	Pf3D7_08_v3	815150	+	302	1.342	-0.065	2.748	-2.531	1.94	0.0609	0.0609	-3.938	conserved Plasmodium protein, unknown function	NA
2611	PF3D7_0930100	Pf3D7_09_v3	1191787	-	3453	0.812	-0.039	1.663	1.945	1.939	0.061	0.061	-4.077	conserved Plasmodium protein, unknown function	NA
1088	PF3D7_0512900	Pf3D7_05_v3	553990	+	798	0.768	-0.038	1.573	1.029	1.938	0.0611	0.0611	-4.019	AKAP-like protein	AKAL
3922	PF3D7_1229500	Pf3D7_12_v3	1211788	+	1776	0.366	-0.018	0.751	9.543	1.936	0.0613	0.0613	-4.605	T-complex protein 1 subunit gamma	CCT3
4929	PF3D7_1401050	Pf3D7_14_v3	39081	+	1360	0.877	-0.045	1.799	3.835	1.937	0.0615	0.0615	-4.256	erythrocyte membrane protein 1 (PfEMP1), exon 2, pseudogene	NA
475	PF3D7_0303300	Pf3D7_03_v3	175022	-	778	0.416	-0.021	0.854	7.484	1.934	0.0616	0.0616	-4.493	DNA-directed RNA polymerases I, II, and III subunit RPABC2, putative	RPB6
4335	PF3D7_1315000	Pf3D7_13_v3	636812	+	801	0.364	-0.019	0.746	5.945	1.934	0.0616	0.0616	-4.364	conserved Plasmodium protein, unknown function	NA
2103	PF3D7_0813800	Pf3D7_08_v3	676391	+	1074	0.89	-0.046	1.825	4.54	1.937	0.0617	0.0617	-4.313	GDP-mannose 4,6-dehydratase	GMD
3996	PF3D7_1236800	Pf3D7_12_v3	1532248	+	1830	0.98	-0.051	2.012	-1.101	1.932	0.0618	0.0618	-3.964	protein-S-isoprenylcysteine O-methyltransferase, putative	NA
305	PF3D7_0210100	Pf3D7_02_v3	412275	+	585	0.331	-0.017	0.68	9.197	1.933	0.0618	0.0618	-4.582	60S ribosomal protein L37ae, putative	NA
306	PF3D7_0210100	Pf3D7_02_v3	412275	+	585	0.331	-0.017	0.68	9.197	1.933	0.0618	0.0618	-4.582	60S ribosomal protein L37ae, putative	NA
472	PF3D7_0303000	Pf3D7_03_v3	159353	-	2352	-0.416	-0.854	0.022	5.172	-1.93	0.0621	0.0621	-4.296	N-ethylmaleimide-sensitive fusion protein	NSF
3552	PF3D7_1143200	Pf3D7_11_v3	1729793	+	1107	1.32	-0.072	2.711	-0.634	1.929	0.0623	0.0623	-3.98	DnaJ protein, putative	NA
772	PF3D7_0407700	Pf3D7_04_v3	377481	-	5607	1.352	-0.077	2.782	-1.385	1.924	0.0629	0.0629	-3.984	conserved Plasmodium protein, unknown function	NA
2540	PF3D7_0923200	Pf3D7_09_v3	944126	+	2343	-0.44	-0.906	0.025	7.365	-1.924	0.0629	0.0629	-4.478	nitric oxide synthase, putative	NOS
3305	PF3D7_1119200	Pf3D7_11_v3	722717	-	573	-0.389	-0.801	0.022	7.509	-1.924	0.063	0.063	-4.496	conserved protein, unknown function	NA
5611	PF3D7_1467900	Pf3D7_14_v3	2771101	+	5208	-1.308	-2.693	0.076	4.382	-1.931	0.0631	0.0631	-4.248	rab GTPase activator, putative	NA
2985	PF3D7_1028800	Pf3D7_10_v3	1183487	-	509	1.242	-0.073	2.556	-2.36	1.921	0.0634	0.0634	-3.967	conserved Plasmodium protein, unknown function	NA
2351	PF3D7_0904800	Pf3D7_09_v3	222271	+	1886	0.612	-0.036	1.26	4.784	1.921	0.0634	0.0634	-4.319	replication protein A1, small fragment	RPA1
1089	PF3D7_0513000	Pf3D7_05_v3	555264	+	810	0.675	-0.04	1.39	2.769	1.919	0.0635	0.0635	-4.159	conserved Plasmodium protein, unknown function	NA
636	PF3D7_0319000	Pf3D7_03_v3	795577	+	5595	-0.529	-1.089	0.032	3.447	-1.918	0.0637	0.0637	-4.182	P-type ATPase, putative	ATPase7
4761	PF3D7_1357300	Pf3D7_13_v3	2274713	+	366	-1.064	-2.191	0.064	-1.463	-1.918	0.0637	0.0637	-3.988	dynein light chain, putative	NA
1216	PF3D7_0525700	Pf3D7_05_v3	1068516	+	770	1.187	-0.072	2.446	-3.221	1.917	0.0638	0.0638	-3.965	conserved Plasmodium protein, unknown function	NA
4022	PF3D7_1239400	Pf3D7_12_v3	1646612	-	540	0.957	-0.059	1.972	-4.081	1.916	0.064	0.064	-3.961	conserved Plasmodium protein, unknown function	NA
4132	PF3D7_1250300	Pf3D7_12_v3	2064987	+	1054	0.604	-0.037	1.246	3.441	1.916	0.064	0.064	-4.219	vacuolar protein sorting-associated protein 26, putative	VPS26
2837	PF3D7_1014500	Pf3D7_10_v3	576579	+	3900	-0.506	-1.044	0.031	4.792	-1.915	0.0641	0.0641	-4.297	conserved Plasmodium protein, unknown function	NA
4857	PF3D7_1366900	Pf3D7_13_v3	2675590	+	2377	0.327	-0.021	0.674	10.035	1.913	0.0644	0.0644	-4.68	conserved Plasmodium protein, unknown function	NA
2430	PF3D7_0912200	Pf3D7_09_v3	549085	-	1362	0.624	-0.04	1.288	4.269	1.911	0.0646	0.0646	-4.294	conserved Plasmodium membrane protein, unknown function	NA
3822	PF3D7_1219400	Pf3D7_12_v3	776510	-	3424	-1.298	-2.68	0.084	2.136	-1.915	0.0647	0.0647	-4.146	erythrocyte membrane protein 1 (PfEMP1), pseudogene	VAR
2544	PF3D7_0923600	Pf3D7_09_v3	958763	+	1155	-0.893	-1.844	0.058	0.955	-1.91	0.0648	0.0648	-4.07	lipoate-protein ligase 2	LipL2
266	PF3D7_0206300	Pf3D7_02_v3	252394	+	10050	-1.403	-2.898	0.093	8.966	-1.924	0.0648	0.0648	-4.589	pentafunctional AROM polypeptide, putative, pseudogene	AROM
5262	PF3D7_1433300	Pf3D7_14_v3	1310041	+	1794	-0.816	-1.685	0.053	2.702	-1.909	0.0649	0.0649	-4.154	chromatin assembly factor 1 P55 subunit, putative	NA
4130	PF3D7_1250100	Pf3D7_12_v3	2045070	-	9360	-0.591	-1.22	0.039	1.974	-1.909	0.065	0.065	-4.142	osmiophilic body protein G377	G377
1749	PF3D7_0711800	Pf3D7_07_v3	523147	+	135	-1.239	-2.56	0.082	-4.118	-1.908	0.065	0.065	-3.97	Plasmodium RNA of unknown function RUF6	NA
2699	PF3D7_1001000	Pf3D7_10_v3	63152	+	881	2.459	-0.165	5.083	2.246	1.922	0.0652	0.0652	-4.177	Plasmodium exported protein (hyp12), unknown function	PfJ13
2582	PF3D7_0927300	Pf3D7_09_v3	1113958	+	2046	0.909	-0.06	1.878	-0.36	1.907	0.0652	0.0652	-4.039	fumarate hydratase, putative	FH
849	PF3D7_0415200	Pf3D7_04_v3	672500	-	6639	-0.441	-0.911	0.029	3.682	-1.907	0.0652	0.0652	-4.206	conserved Plasmodium protein, unknown function	NA
2011	PF3D7_0804800	Pf3D7_08_v3	278381	+	654	-0.39	-0.806	0.026	7.117	-1.906	0.0653	0.0653	-4.482	peptidyl-prolyl cis-trans isomerase	CYP24
1787	PF3D7_0715600	Pf3D7_07_v3	691068	+	2265	1.07	-0.073	2.212	-2.867	1.904	0.0655	0.0655	-3.985	GTP-binding translation elongation factor tu family protein, putative	NA
1503	PF3D7_0620500	Pf3D7_06_v3	855160	+	1953	-0.359	-0.742	0.024	6.485	-1.905	0.0655	0.0655	-4.434	cleavage stimulation factor subunit 1, putative	NA
5050	PF3D7_1412600	Pf3D7_14_v3	509686	-	1491	-0.492	-1.018	0.033	5.992	-1.905	0.0655	0.0655	-4.384	deoxyhypusine synthase	DHS
2537	PF3D7_0922900	Pf3D7_09_v3	936868	-	1478	-0.529	-1.094	0.036	2.271	-1.904	0.0656	0.0656	-4.175	3-oxoacyl-[acyl-carrier-protein] reductase	FabG
526	PF3D7_0308400	Pf3D7_03_v3	368572	+	119	0.752	-0.052	1.556	1.208	1.901	0.066	0.066	-4.108	U4 spliceosomal RNA	NA
1497	PF3D7_0619900	Pf3D7_06_v3	840523	+	702	-0.461	-0.954	0.032	5.354	-1.901	0.066	0.066	-4.349	splicing factor 3A subunit 2, putative	SF3A2
734	PF3D7_0403800	Pf3D7_04_v3	211515	-	2340	-0.438	-0.907	0.031	4.753	-1.9	0.0661	0.0661	-4.293	alpha/beta hydrolase, putative	NA
895	PF3D7_0419800	Pf3D7_04_v3	874811	-	711	-0.358	-0.741	0.026	7.274	-1.898	0.0664	0.0664	-4.51	60S ribosomal protein L7ae/L30e, putative	NA
5273	PF3D7_1434400	Pf3D7_14_v3	1375624	-	1207	-0.552	-1.143	0.04	2.082	-1.898	0.0664	0.0664	-4.156	conserved Plasmodium membrane protein, unknown function	NA
1585	PF3D7_0628400	Pf3D7_06_v3	1176265	+	2323	0.642	-0.046	1.329	2.911	1.898	0.0665	0.0665	-4.211	conserved Plasmodium membrane protein, unknown function	NA
561	PF3D7_0311800	Pf3D7_03_v3	506655	+	2192	0.689	-0.05	1.428	1.096	1.895	0.0668	0.0668	-4.109	conserved protein, unknown function	NA
3594	PF3D7_1147500	Pf3D7_11_v3	1889826	-	2772	-0.704	-1.459	0.051	4.511	-1.895	0.0668	0.0668	-4.297	protein farnesyltransferase subunit beta	NA
166	PF3D7_0112300	Pf3D7_01_v3	473739	+	2149	-1.194	-2.476	0.088	5.876	-1.904	0.0668	0.0668	-4.393	18S ribosomal RNA	NA
701	PF3D7_0400600	Pf3D7_04_v3	61411	+	79	-1.411	-2.926	0.103	-2.96	-1.895	0.0668	0.0668	-3.993	erythrocyte membrane protein 1 (PfEMP1), exon 1, pseudogene	NA
4544	PF3D7_1335600	Pf3D7_13_v3	1454507	+	1369	-0.46	-0.953	0.034	4.257	-1.893	0.0671	0.0671	-4.272	conserved Plasmodium protein, unknown function	NA
4212	PF3D7_1303100	Pf3D7_13_v3	159024	+	892	0.626	-0.047	1.299	3.827	1.892	0.0672	0.0672	-4.291	methyltransferase-like protein, putative	NA
5168	PF3D7_1424100	Pf3D7_14_v3	973853	-	1691	0.384	-0.029	0.796	10.065	1.892	0.0672	0.0672	-4.717	60S ribosomal protein L5, putative	NA
319	PF3D7_0211400	Pf3D7_02_v3	459072	-	2447	1.079	-0.081	2.24	-3.545	1.891	0.0673	0.0673	-3.996	beta-ketoacyl-ACP synthase III	KASIII
32	malmito_rna_RNA11	Pf_M76611	5284	-	57	-1.096	-2.274	0.082	-4.594	-1.892	0.0673	0.0673	-3.99	unspecified product	RNA11
405	PF3D7_0219800	Pf3D7_02_v3	786870	-	1071	0.473	-0.036	0.983	5.946	1.89	0.0675	0.0675	-4.439	Plasmodium exported protein (PHISTc), unknown function	NA
2409	PF3D7_0910200	Pf3D7_09_v3	464559	+	9210	-0.676	-1.403	0.052	7.324	-1.89	0.0677	0.0677	-4.527	conserved Plasmodium protein, unknown function	NA
1294	PF3D7_0600100	Pf3D7_06_v3	653	-	780	2.287	-0.178	4.753	-2.657	1.895	0.0678	0.0678	-4.006	erythrocyte membrane protein 1 (PfEMP1), pseudogene	VAR
915	PF3D7_0421800	Pf3D7_04_v3	995998	+	255	-0.818	-1.699	0.063	-4.728	-1.888	0.0678	0.0678	-3.995	conserved Plasmodium protein, unknown function	NA
4446	PF3D7_1326000	Pf3D7_13_v3	1085786	-	1076	0.704	-0.055	1.463	0.84	1.886	0.068	0.068	-4.107	conserved Plasmodium protein, unknown function	NA
5661	PF3D7_1472900	Pf3D7_14_v3	2972978	+	1077	-0.489	-1.016	0.038	4.307	-1.886	0.068	0.068	-4.279	dihydroorotase, putative	NA
3847	PF3D7_1222000	Pf3D7_12_v3	876916	-	1710	0.628	-0.049	1.305	4.717	1.886	0.0681	0.0681	-4.393	tRNA-splicing ligase RtcB, putative	NA
3790	PF3D7_1216300	Pf3D7_12_v3	651398	-	459	0.351	-0.028	0.729	6.927	1.885	0.0681	0.0681	-4.527	signal recognition particle subunit SRP19	SRP19
2471	PF3D7_0916400	Pf3D7_09_v3	683562	+	7560	-0.499	-1.037	0.039	5.368	-1.886	0.0681	0.0681	-4.36	conserved Plasmodium protein, unknown function	NA
2076	PF3D7_0811200	Pf3D7_08_v3	560744	+	3533	-0.4	-0.831	0.032	7.088	-1.882	0.0686	0.0686	-4.526	ER membrane protein complex subunit 1, putative	EMC1
1451	PF3D7_0615500	Pf3D7_06_v3	644052	+	2118	-0.583	-1.213	0.047	2.984	-1.881	0.0687	0.0687	-4.207	cdc2-related protein kinase 5	CRK5
1537	PF3D7_0623800	Pf3D7_06_v3	963741	-	7215	0.364	-0.03	0.757	10.804	1.881	0.0688	0.0688	-4.769	tyrosine kinase-like protein, putative	TKL4
3242	PF3D7_1113200	Pf3D7_11_v3	517311	+	675	0.418	-0.035	0.87	5.029	1.878	0.0692	0.0692	-4.395	conserved Plasmodium protein, unknown function	NA
4369	PF3D7_1318400	Pf3D7_13_v3	760326	-	3814	1.081	-0.092	2.254	2.515	1.877	0.0696	0.0696	-4.223	structural maintenance of chromosomes protein 2, putative	SMC2
4094	PF3D7_1246600	Pf3D7_12_v3	1936522	+	1173	-0.387	-0.806	0.033	7.646	-1.875	0.0696	0.0696	-4.582	pre-mRNA-splicing factor CWC26, putative	BUD13
5595	PF3D7_1466300	Pf3D7_14_v3	2709418	+	3775	-0.279	-0.582	0.024	9.168	-1.873	0.0699	0.0699	-4.684	26S proteasome regulatory subunit RPN2, putative	RPN2
1362	PF3D7_0606900	Pf3D7_06_v3	290426	-	660	-0.512	-1.068	0.044	5.216	-1.872	0.07	0.07	-4.367	glutaredoxin-like protein	GLP2
3392	PF3D7_1127900	Pf3D7_11_v3	1083321	-	1742	0.587	-0.051	1.225	3.704	1.871	0.0702	0.0702	-4.263	conserved Plasmodium protein, unknown function	NA
2859	PF3D7_1016400	Pf3D7_10_v3	656709	-	2319	0.3	-0.026	0.627	8.783	1.87	0.0703	0.0703	-4.671	serine/threonine protein kinase, FIKK family	FIKK10.1
5559	PF3D7_1462700	Pf3D7_14_v3	2553714	-	1391	-0.786	-1.64	0.069	3.073	-1.87	0.0703	0.0703	-4.264	cytochrome c1 precursor, putative	NA
1630	PF3D7_0700100	Pf3D7_07_v3	20307	+	7777	-0.724	-1.512	0.064	5.547	-1.87	0.0705	0.0705	-4.444	erythrocyte membrane protein 1, PfEMP1	VAR
3955	PF3D7_1232700	Pf3D7_12_v3	1346052	+	4461	0.77	-0.068	1.608	-0.989	1.868	0.0706	0.0706	-4.072	conserved Plasmodium protein, unknown function	NA
5151	PF3D7_1422400	Pf3D7_14_v3	900386	+	4893	-0.274	-0.573	0.024	7.459	-1.868	0.0706	0.0706	-4.581	conserved Plasmodium protein, unknown function	NA
1806	PF3D7_0717500	Pf3D7_07_v3	755763	+	1934	0.415	-0.037	0.867	6.864	1.867	0.0707	0.0707	-4.572	calcium-dependent protein kinase 4	CDPK4
487	PF3D7_0304500	Pf3D7_03_v3	219117	-	756	0.788	-0.072	1.648	1.521	1.864	0.0711	0.0711	-4.191	1-cys-glutaredoxin-like protein-1	GLP1
4939	PF3D7_1402000	Pf3D7_14_v3	77258	-	3166	0.695	-0.064	1.453	4.1	1.863	0.0713	0.0713	-4.335	conserved Plasmodium protein, unknown function	NA
480	PF3D7_0303800	Pf3D7_03_v3	194430	+	1782	1.055	-0.097	2.207	-0.791	1.862	0.0714	0.0714	-4.072	IBR domain protein, putative	NA
1983	PF3D7_0802000	Pf3D7_08_v3	146089	+	4194	0.822	-0.076	1.72	7.957	1.869	0.0714	0.0714	-4.662	glutamate dehydrogenase, putative	GDH3
3918	PF3D7_1229100	Pf3D7_12_v3	1192888	-	6327	0.467	-0.043	0.978	10.84	1.862	0.0716	0.0716	-4.807	multidrug resistance-associated protein 2	MRP2
2726	PF3D7_1003500	Pf3D7_10_v3	160316	-	647	0.298	-0.028	0.624	8.415	1.861	0.0716	0.0716	-4.658	40S ribosomal protein S20e, putative	NA
2697	PF3D7_1000800	Pf3D7_10_v3	57968	+	1013	1.404	-0.131	2.94	-1.599	1.861	0.0717	0.0717	-4.077	stevor, pseudogene	NA
3783	PF3D7_1215600	Pf3D7_12_v3	635035	+	423	1.319	-0.123	2.761	-2.707	1.86	0.0717	0.0717	-4.044	conserved Plasmodium protein, unknown function	NA
1109	PF3D7_0515000	Pf3D7_05_v3	620810	-	2547	-0.35	-0.732	0.033	8.399	-1.86	0.0717	0.0717	-4.658	pre-mRNA-splicing factor CWC2, putative	CWC2
1558	PF3D7_0625800	Pf3D7_06_v3	1043546	+	1929	-0.391	-0.819	0.037	5.139	-1.86	0.0717	0.0717	-4.406	conserved Plasmodium protein, unknown function	NA
1220	PF3D7_0526100	Pf3D7_05_v3	1079779	+	1230	0.979	-0.092	2.049	-0.22	1.859	0.0719	0.0719	-4.092	conserved Plasmodium membrane protein, unknown function	NA
4310	PF3D7_1312500	Pf3D7_13_v3	526863	-	198	1.092	-0.104	2.289	-0.142	1.857	0.0721	0.0721	-4.117	conserved Plasmodium protein, unknown function	NA
2768	PF3D7_1007700	Pf3D7_10_v3	301126	-	4794	0.516	-0.049	1.081	5	1.857	0.0722	0.0722	-4.454	transcription factor with AP2 domain(s)	ApiAP2
4321	PF3D7_1313600	Pf3D7_13_v3	579526	-	6090	-1.171	-2.453	0.111	-0.073	-1.857	0.0722	0.0722	-4.117	conserved Plasmodium protein, unknown function	NA
5331	PF3D7_1440100	Pf3D7_14_v3	1633211	-	3045	1.168	-0.113	2.449	-0.817	1.855	0.0724	0.0724	-4.091	conserved Plasmodium protein, unknown function	NA
2408	PF3D7_0910100	Pf3D7_09_v3	456959	-	4360	-0.263	-0.55	0.025	8.245	-1.856	0.0724	0.0724	-4.657	exportin-7, putative	NA
3616	PF3D7_1149500	Pf3D7_11_v3	1991359	-	2660	0.346	-0.033	0.725	7.686	1.855	0.0725	0.0725	-4.634	ring-infected erythrocyte surface antigen 2, pseudogene	RESA2
1267	PF3D7_0530600	Pf3D7_05_v3	1248368	-	1594	-0.373	-0.783	0.036	6.261	-1.854	0.0725	0.0725	-4.507	XAP-5 DNA binding protein, putative	NA
2229	PF3D7_0826500	Pf3D7_08_v3	1152302	+	3981	-0.367	-0.77	0.036	7.858	-1.854	0.0726	0.0726	-4.63	ubiquitin conjugation factor E4 B, putative	UBE4B
122	PF3D7_0107900	Pf3D7_01_v3	326397	-	828	-0.59	-1.237	0.058	1.952	-1.853	0.0727	0.0727	-4.198	conserved Plasmodium protein, unknown function	NA
3735	PF3D7_1210900	Pf3D7_12_v3	480593	+	2214	0.654	-0.064	1.371	0.873	1.852	0.0728	0.0728	-4.142	GPI mannosyltransferase 1	PIGM
3916	PF3D7_1228900	Pf3D7_12_v3	1180670	-	4814	0.458	-0.045	0.96	6.977	1.853	0.0728	0.0728	-4.594	conserved Plasmodium protein, unknown function	NA
4161	PF3D7_1253200	Pf3D7_12_v3	2173799	-	524	0.936	-0.094	1.966	2.041	1.849	0.0734	0.0734	-4.261	hypothetical protein	NA
2488	PF3D7_0918100	Pf3D7_09_v3	747173	+	1318	0.602	-0.06	1.265	7.065	1.849	0.0734	0.0734	-4.603	cytochrome b5-like heme/steroid binding protein, putative	NA
1237	PF3D7_0527700	Pf3D7_05_v3	1150234	+	73	-0.939	-1.973	0.094	-1.938	-1.848	0.0735	0.0735	-4.062	tRNA Glutamic acid	NA
829	PF3D7_0413300	Pf3D7_04_v3	609155	+	1279	1.444	-0.146	3.035	-2.192	1.847	0.0736	0.0736	-4.066	rifin	RIF
4221	PF3D7_1303900	Pf3D7_13_v3	215291	+	1041	0.998	-0.102	2.098	-3.349	1.845	0.0739	0.0739	-4.056	conserved Plasmodium protein, unknown function	NA
3149	PF3D7_1104000	Pf3D7_11_v3	175608	-	2171	0.384	-0.039	0.806	7.048	1.844	0.074	0.074	-4.587	phenylalanine--tRNA ligase beta subunit	NA
649	PF3D7_0320300	Pf3D7_03_v3	845713	+	1608	0.382	-0.039	0.803	8.859	1.844	0.074	0.074	-4.716	T-complex protein 1 subunit epsilon	CCT5
601	PF3D7_0315600	Pf3D7_03_v3	635586	+	1877	1.128	-0.118	2.373	-0.771	1.842	0.0745	0.0745	-4.108	zinc finger protein, putative	NA
1794	PF3D7_0716300	Pf3D7_07_v3	717281	+	1688	0.595	-0.062	1.252	5.473	1.841	0.0745	0.0745	-4.493	conserved Plasmodium protein, unknown function	NA
5058	PF3D7_1413300	Pf3D7_14_v3	532818	-	472	-0.954	-2.01	0.101	-4.475	-1.839	0.0748	0.0748	-4.057	conserved Plasmodium protein, unknown function	NA
1320	PF3D7_0602700	Pf3D7_06_v3	113824	-	1401	-0.466	-0.981	0.05	3.239	-1.837	0.0751	0.0751	-4.295	conserved Plasmodium protein, unknown function	NA
1004	PF3D7_0504600	Pf3D7_05_v3	177410	+	1146	0.892	-0.096	1.88	0.02	1.835	0.0754	0.0754	-4.166	2-oxoisovalerate dehydrogenase subunit beta, mitochondrial, putative	BCKDHB
1948	PF3D7_0731700	Pf3D7_07_v3	1372063	+	698	-1.431	-3.018	0.155	2.353	-1.84	0.0754	0.0754	-4.197	Plasmodium exported protein (hyp9), unknown function	NA
1197	PF3D7_0523800	Pf3D7_05_v3	990005	+	2055	-0.369	-0.778	0.04	7.04	-1.835	0.0755	0.0755	-4.607	transporter, putative	NA
4754	PF3D7_1356600	Pf3D7_13_v3	2240970	-	1443	-0.7	-1.475	0.076	4.955	-1.834	0.0756	0.0756	-4.425	regulator of chromosome condensation, putative	NA
3196	PF3D7_1108600	Pf3D7_11_v3	369675	-	1032	0.414	-0.045	0.874	8.383	1.833	0.0757	0.0757	-4.705	endoplasmic reticulum-resident calcium binding protein	ERC
3904	PF3D7_1227700	Pf3D7_12_v3	1128939	-	2748	0.305	-0.033	0.643	8.046	1.833	0.0757	0.0757	-4.696	conserved Plasmodium protein, unknown function	NA
4460	PF3D7_1327400	Pf3D7_13_v3	1152603	-	909	0.933	-0.103	1.968	-1.056	1.831	0.076	0.076	-4.119	conserved Plasmodium protein, unknown function	NA
1529	PF3D7_0623000	Pf3D7_06_v3	937068	-	1584	-0.457	-0.964	0.051	3.799	-1.83	0.0762	0.0762	-4.367	chorismate synthase	CS
500	PF3D7_0305800	Pf3D7_03_v3	281916	+	3345	-0.526	-1.111	0.059	4.235	-1.829	0.0763	0.0763	-4.42	P-loop containing nucleoside triphosphate hydrolase, putative	NA
2106	PF3D7_0814100	Pf3D7_08_v3	682518	-	1055	0.604	-0.068	1.276	5.549	1.828	0.0765	0.0765	-4.522	conserved Plasmodium protein, unknown function	NA
3653	PF3D7_1202700	Pf3D7_12_v3	158233	+	1779	0.324	-0.037	0.685	7.615	1.826	0.0768	0.0768	-4.678	conserved Plasmodium protein, unknown function	NA
1687	PF3D7_0705800	Pf3D7_07_v3	287597	-	1492	0.641	-0.073	1.356	0.414	1.825	0.077	0.077	-4.188	cysteine-rich secretory protein, putative	NA
1414	PF3D7_0612000	Pf3D7_06_v3	507678	-	609	-0.617	-1.307	0.073	1.266	-1.82	0.0778	0.0778	-4.204	conserved Plasmodium protein, unknown function	NA
2075	PF3D7_0811100	Pf3D7_08_v3	557884	-	1623	-0.62	-1.314	0.073	1.548	-1.819	0.0779	0.0779	-4.195	mitochondrial carrier protein, putative	NA
768	PF3D7_0407300	Pf3D7_04_v3	366379	+	963	-0.33	-0.699	0.039	5.958	-1.818	0.0781	0.0781	-4.542	transcription factor, putative	NA
5534	PF3D7_1460300	Pf3D7_14_v3	2459214	-	751	0.32	-0.038	0.678	7.482	1.817	0.0782	0.0782	-4.672	60S ribosomal protein L29, putative	NA
2553	PF3D7_0924400	Pf3D7_09_v3	988977	+	3939	-0.289	-0.612	0.034	8.2	-1.817	0.0782	0.0782	-4.717	conserved Plasmodium protein, unknown function	NA
2897	PF3D7_1020000	Pf3D7_10_v3	811106	-	2379	0.397	-0.048	0.842	8.314	1.817	0.0783	0.0783	-4.734	RNA-binding protein 34, putative	RBM34
2618	PF3D7_0930700	Pf3D7_09_v3	1221987	+	1620	-0.466	-0.988	0.056	4.439	-1.817	0.0783	0.0783	-4.403	conserved Plasmodium protein, unknown function	NA
5657	PF3D7_1472500	Pf3D7_14_v3	2961722	-	924	-0.655	-1.39	0.079	1.286	-1.815	0.0785	0.0785	-4.208	conserved Plasmodium protein, unknown function	NA
2779	PF3D7_1008800	Pf3D7_10_v3	365737	-	1410	0.277	-0.034	0.587	9.694	1.814	0.0787	0.0787	-4.819	nucleolar protein 5, putative	NOP5
2838	PF3D7_1014600	Pf3D7_10_v3	581354	-	7737	0.341	-0.042	0.724	9.483	1.813	0.0788	0.0788	-4.814	transcriptional coactivator ADA2	ADA2
2439	PF3D7_0913200	Pf3D7_09_v3	575679	+	831	0.378	-0.047	0.802	9.332	1.811	0.0792	0.0792	-4.797	elongation factor 1-beta	EF-1beta
5230	PF3D7_1430100	Pf3D7_14_v3	1184910	+	2133	0.957	-0.119	2.032	0.172	1.809	0.0794	0.0794	-4.212	serine/threonine protein phosphatase 2A activator	PTPA
4896	PF3D7_1371200	Pf3D7_13_v3	2802527	+	160	-0.975	-2.072	0.121	-3.654	-1.809	0.0794	0.0794	-4.099	5.8S ribosomal RNA	NA
1333	PF3D7_0604000	Pf3D7_06_v3	163828	-	6033	0.976	-0.124	2.076	-2.302	1.804	0.0802	0.0802	-4.121	conserved Plasmodium protein, unknown function	NA
4963	PF3D7_1404400	Pf3D7_14_v3	151765	+	546	0.692	-0.088	1.472	1.337	1.805	0.0802	0.0802	-4.241	mitochondrial ribosomal protein L16 precursor, putative	NA
5011	PF3D7_1409000	Pf3D7_14_v3	353263	-	1879	-0.432	-0.918	0.055	5.86	-1.804	0.0802	0.0802	-4.541	WD repeat-containing protein, putative	NA
1080	PF3D7_0512200	Pf3D7_05_v3	529934	-	1968	-0.591	-1.257	0.075	3.688	-1.805	0.0802	0.0802	-4.354	glutathione synthetase	GS
990	PF3D7_0503100	Pf3D7_05_v3	127064	-	1614	1.159	-0.148	2.466	1.749	1.806	0.0803	0.0803	-4.25	4-diphosphocytidyl-2-C-methyl-D-erythritol kinase, putative	IspE
1883	PF3D7_0725300	Pf3D7_07_v3	1072202	-	2553	-0.379	-0.807	0.049	7.133	-1.803	0.0805	0.0805	-4.657	conserved Plasmodium protein, unknown function	NA
5704	PF3D7_1477300	Pf3D7_14_v3	3179624	+	987	2.041	-0.267	4.349	1.802	1.813	0.0807	0.0807	-4.295	Plasmodium exported protein (PHIST), unknown function	Pfg14-744
5591	PF3D7_1465900	Pf3D7_14_v3	2684141	+	1394	0.272	-0.035	0.579	9.7	1.801	0.0808	0.0808	-4.838	40S ribosomal protein S3	NA
84	PF3D7_0104200	Pf3D7_01_v3	182822	-	1401	-0.535	-1.14	0.069	4.199	-1.8	0.0809	0.0809	-4.443	StAR-related lipid transfer protein	NA
1210	PF3D7_0525100	Pf3D7_05_v3	1041745	+	2022	-0.319	-0.68	0.042	9.251	-1.799	0.081	0.081	-4.811	acyl-CoA synthetase	ACS10
5658	PF3D7_1472600	Pf3D7_14_v3	2962986	-	2101	-0.722	-1.538	0.094	-1.671	-1.8	0.081	0.081	-4.162	protein disulfide-isomerase	PDI-14
3374	PF3D7_1126100	Pf3D7_11_v3	1018366	-	4130	-0.533	-1.135	0.07	3.342	-1.799	0.0811	0.0811	-4.389	autophagy-related protein 7, putative	ATG7
1103	PF3D7_0514400	Pf3D7_05_v3	603951	-	73	-1.322	-2.816	0.172	-2.608	-1.799	0.0811	0.0811	-4.117	tRNA Phenylalanine	NA
4546	PF3D7_1335800	Pf3D7_13_v3	1462180	+	1812	1.091	-0.143	2.326	-0.018	1.798	0.0812	0.0812	-4.182	conserved Plasmodium protein, unknown function	NA
3336	PF3D7_1122300	Pf3D7_11_v3	846929	+	1086	-0.464	-0.989	0.061	4.878	-1.798	0.0812	0.0812	-4.471	conserved Plasmodium protein, unknown function	NA
3632	PF3D7_1200700	Pf3D7_12_v3	61556	-	2781	0.37	-0.049	0.789	11.119	1.796	0.0815	0.0815	-4.932	acyl-CoA synthetase	ACS7
2221	PF3D7_0825700	Pf3D7_08_v3	1101887	-	918	-0.928	-1.978	0.123	-1.806	-1.796	0.0815	0.0815	-4.138	conserved Plasmodium protein, unknown function	NA
5488	PF3D7_1455700	Pf3D7_14_v3	2278701	-	3462	0.905	-0.12	1.93	-2.248	1.796	0.0816	0.0816	-4.141	conserved Plasmodium protein, unknown function	NA
2926	PF3D7_1022900	Pf3D7_10_v3	958939	-	958	0.998	-0.134	2.131	-1.114	1.793	0.0821	0.0821	-4.164	CDGSH iron-sulfur domain-containing protein, putative	NA
2953	PF3D7_1025600	Pf3D7_10_v3	1088214	+	204	0.895	-0.12	1.911	-4.148	1.793	0.0821	0.0821	-4.117	cytochrome c oxidase copper chaperone, putative	COX17
4122	PF3D7_1249300	Pf3D7_12_v3	2012643	+	3084	-0.318	-0.679	0.043	6.706	-1.792	0.0821	0.0821	-4.644	protein phosphatase PPM4, putative	PPM4
3112	PF3D7_1100200	Pf3D7_11_v3	32666	-	9721	1.514	-0.207	3.236	3.638	1.802	0.0823	0.0823	-4.457	erythrocyte membrane protein 1, PfEMP1	VAR
3621	PF3D7_1150000	Pf3D7_11_v3	2012989	+	1328	1.433	-0.194	3.06	-2.902	1.791	0.0823	0.0823	-4.132	rifin	RIF
3546	PF3D7_1142600	Pf3D7_11_v3	1708066	-	614	0.293	-0.04	0.626	9.539	1.792	0.0823	0.0823	-4.841	60S ribosomal protein L35ae, putative	NA
3276	PF3D7_1116400	Pf3D7_11_v3	619893	-	1458	-0.487	-1.04	0.066	5.569	-1.79	0.0826	0.0826	-4.551	guanine nucleotide-exchange factor SEC12	SEC12
658	PF3D7_0321200	Pf3D7_03_v3	886962	-	2015	0.927	-0.127	1.982	-1.675	1.789	0.0827	0.0827	-4.15	UDP-N-acetylglucosamine--dolichyl-phosphate N-acetylglucosaminephosphotransferase, putative	ALG7
4730	PF3D7_1354100	Pf3D7_13_v3	2158129	-	1071	0.545	-0.074	1.164	2.587	1.789	0.0827	0.0827	-4.333	conserved Plasmodium protein, unknown function	NA
2526	PF3D7_0921800	Pf3D7_09_v3	886065	-	1325	0.332	-0.046	0.71	6.547	1.789	0.0827	0.0827	-4.648	ribosome production factor 1, putative	RPF1
988	PF3D7_0502900	Pf3D7_05_v3	123332	-	573	0.707	-0.097	1.51	2.214	1.789	0.0828	0.0828	-4.318	mitochondrial inner membrane TIM10 associated protein, putative	NA
4259	PF3D7_1307600	Pf3D7_13_v3	339927	-	1962	0.425	-0.058	0.909	3.922	1.789	0.0828	0.0828	-4.437	DNA-directed RNA polymerase alpha chain, putative	NA
4615	PF3D7_1342700	Pf3D7_13_v3	1677540	-	378	0.399	-0.055	0.852	4.727	1.789	0.0828	0.0828	-4.507	DNA-directed RNA polymerases I, II, and III subunit RPABC4, putative	RPB12
5634	PF3D7_1470200	Pf3D7_14_v3	2877586	-	1163	0.384	-0.053	0.82	5.496	1.789	0.0828	0.0828	-4.559	conserved Plasmodium protein, unknown function	NA
698	PF3D7_0400300	Pf3D7_04_v3	42032	-	1343	0.978	-0.136	2.092	0.973	1.786	0.0832	0.0832	-4.255	rifin	RIF
3698	PF3D7_1207300	Pf3D7_12_v3	343326	-	1036	1.086	-0.152	2.324	-3.536	1.785	0.0834	0.0834	-4.132	conserved Plasmodium protein, unknown function	NA
3499	PF3D7_1138000	Pf3D7_11_v3	1487594	+	8550	0.817	-0.114	1.748	-0.536	1.785	0.0834	0.0834	-4.205	conserved Plasmodium protein, unknown function	NA
2885	PF3D7_1018900	Pf3D7_10_v3	752760	-	2151	-0.41	-0.876	0.057	4.121	-1.785	0.0834	0.0834	-4.462	conserved Plasmodium protein, unknown function	NA
2035	PF3D7_0807200	Pf3D7_08_v3	378024	+	1423	-0.436	-0.934	0.061	5.619	-1.783	0.0837	0.0837	-4.572	conserved Plasmodium membrane protein, unknown function	NA
3471	PF3D7_1135400	Pf3D7_11_v3	1384378	-	738	-0.4	-0.857	0.056	6.558	-1.782	0.0838	0.0838	-4.636	conserved Plasmodium protein, unknown function	NA
4241	PF3D7_1305800	Pf3D7_13_v3	278294	+	840	-1.063	-2.277	0.15	-4.015	-1.782	0.0838	0.0838	-4.129	conserved Plasmodium protein, unknown function	NA
2481	PF3D7_0917400	Pf3D7_09_v3	720990	+	3876	0.972	-0.137	2.08	-2.326	1.782	0.0839	0.0839	-4.156	conserved Plasmodium protein, unknown function	NA
1989	PF3D7_0802600	Pf3D7_08_v3	180563	+	7551	-0.68	-1.455	0.096	4.005	-1.781	0.084	0.084	-4.432	adenylyl cyclase beta	ACbeta
1068	PF3D7_0511000	Pf3D7_05_v3	467585	-	516	0.484	-0.069	1.037	8.07	1.78	0.0842	0.0842	-4.768	translationally-controlled tumor protein homolog	TCTP
1941	PF3D7_0731000	Pf3D7_07_v3	1333175	-	1764	0.478	-0.068	1.024	4.69	1.779	0.0843	0.0843	-4.525	unspecified product	NA
2182	PF3D7_0821800	Pf3D7_08_v3	976074	+	571	0.416	-0.059	0.891	7.09	1.78	0.0843	0.0843	-4.704	protein transport protein SEC61 subunit beta, putative	SEC61B
1034	PF3D7_0507600	Pf3D7_05_v3	313199	+	1959	-0.506	-1.086	0.073	5.309	-1.778	0.0846	0.0846	-4.523	cell differentiation protein, putative	CAF40
4491	PF3D7_1330400	Pf3D7_13_v3	1279800	-	1486	-0.253	-0.543	0.037	6.931	-1.777	0.0847	0.0847	-4.682	ER lumen protein retaining receptor 1, putative, unspecified product	NA
4492	PF3D7_1330400	Pf3D7_13_v3	1279800	-	1486	-0.253	-0.543	0.037	6.931	-1.777	0.0847	0.0847	-4.682	ER lumen protein retaining receptor 1, putative, unspecified product	NA
4718	PF3D7_1352900	Pf3D7_13_v3	2114157	-	2055	1.04	-0.152	2.232	6.873	1.785	0.0848	0.0848	-4.722	Plasmodium exported protein, unknown function	NA
2905	PF3D7_1020800	Pf3D7_10_v3	840212	+	3192	0.397	-0.058	0.852	4.651	1.776	0.0849	0.0849	-4.573	dihydrolipoamide acyltransferase component E2	DLAT
3917	PF3D7_1229000	Pf3D7_12_v3	1186415	+	5505	-0.29	-0.622	0.042	7.029	-1.776	0.0849	0.0849	-4.704	conserved Plasmodium membrane protein, unknown function	NA
1059	PF3D7_0510100	Pf3D7_05_v3	422746	-	7608	-0.817	-1.753	0.119	4.067	-1.776	0.085	0.085	-4.424	conserved Plasmodium protein, unknown function	NA
3282	PF3D7_1117000	Pf3D7_11_v3	646922	-	4422	0.964	-0.142	2.07	-2.226	1.772	0.0855	0.0855	-4.173	conserved Plasmodium membrane protein, unknown function	NA
518	PF3D7_0307600	Pf3D7_03_v3	325922	+	2462	0.936	-0.138	2.01	-1.519	1.772	0.0855	0.0855	-4.185	conserved Plasmodium protein, unknown function	NA
3012	PF3D7_1031400	Pf3D7_10_v3	1265079	+	3707	0.843	-0.125	1.812	-0.364	1.771	0.0856	0.0856	-4.225	OTU domain-containing protein, putative	NA
3013	PF3D7_1031400	Pf3D7_10_v3	1265079	+	3707	0.843	-0.125	1.812	-0.364	1.771	0.0856	0.0856	-4.225	OTU domain-containing protein, putative	NA
2432	PF3D7_0912500	Pf3D7_09_v3	556090	+	1869	0.258	-0.038	0.554	7.883	1.771	0.0857	0.0857	-4.784	SAP domain-containing protein, putative	NA
486	PF3D7_0304400	Pf3D7_03_v3	217941	+	549	0.332	-0.049	0.713	8.619	1.77	0.0859	0.0859	-4.82	60S ribosomal protein L44	RPL44
2289	PF3D7_0832250	Pf3D7_08_v3	1394403	+	484	-1.357	-2.916	0.203	-2.742	-1.77	0.0859	0.0859	-4.158	Plasmodium exported protein, unknown function, pseudogene	NA
4244	PF3D7_1306100	Pf3D7_13_v3	288163	+	399	0.967	-0.145	2.079	-3.091	1.769	0.086	0.086	-4.153	conserved Plasmodium protein, unknown function	NA
3032	PF3D7_1033300	Pf3D7_10_v3	1338124	-	695	0.407	-0.061	0.875	4.799	1.769	0.086	0.086	-4.528	conserved Plasmodium protein, unknown function	NA
1058	PF3D7_0510000	Pf3D7_05_v3	418136	+	3290	-0.645	-1.386	0.096	1.586	-1.769	0.086	0.086	-4.323	conserved Plasmodium protein, unknown function	NA
1808	PF3D7_0717700	Pf3D7_07_v3	764794	-	1620	0.328	-0.049	0.706	9.793	1.768	0.0862	0.0862	-4.896	serine--tRNA ligase, putative	NA
790	PF3D7_0409400	Pf3D7_04_v3	446000	+	2019	-0.267	-0.575	0.041	7.181	-1.766	0.0865	0.0865	-4.73	chaperone protein DnaJ	DnaJ
4627	PF3D7_1343900	Pf3D7_13_v3	1756212	+	1947	-0.427	-0.92	0.065	5.529	-1.766	0.0865	0.0865	-4.581	U4/U6 small nuclear ribonucleoprotein PRP4, putative	PRPF4
5041	PF3D7_1411700	Pf3D7_14_v3	475249	+	2049	-0.358	-0.772	0.055	5.482	-1.764	0.0869	0.0869	-4.589	methyltransferase, putative	NA
1145	PF3D7_0518600	Pf3D7_05_v3	769310	+	3831	-0.68	-1.464	0.104	4.164	-1.764	0.0869	0.0869	-4.491	WD repeat-containing protein 26, putative	WDR26
2059	PF3D7_0809600	Pf3D7_08_v3	479980	-	17403	0.48	-0.074	1.035	2.721	1.763	0.087	0.087	-4.401	peptidase family C50, putative	NA
3105	PF3D7_1040800	Pf3D7_10_v3	1625772	+	1053	-1.096	-2.36	0.169	-3.645	-1.762	0.0872	0.0872	-4.157	rifin	RIF
147	PF3D7_0110300	Pf3D7_01_v3	393216	-	275	-0.644	-1.388	0.1	1.279	-1.761	0.0873	0.0873	-4.269	Plasmodium RNA of unknown function RUF5	NA
2797	PF3D7_1010600	Pf3D7_10_v3	420185	-	872	0.33	-0.051	0.712	9.164	1.761	0.0874	0.0874	-4.868	eukaryotic translation initiation factor 2 subunit beta	eIF2beta
4055	PF3D7_1242700	Pf3D7_12_v3	1803653	+	831	0.25	-0.039	0.538	9.511	1.761	0.0874	0.0874	-4.888	40S ribosomal protein S17, putative	NA
1411	PF3D7_0611700	Pf3D7_06_v3	488579	-	709	0.346	-0.054	0.747	7.497	1.761	0.0875	0.0875	-4.762	60S ribosomal protein L39	RPL39
5486	PF3D7_1455500	Pf3D7_14_v3	2267201	+	3651	-0.365	-0.787	0.057	6.705	-1.76	0.0876	0.0876	-4.705	AP-1 complex subunit gamma, putative	NA
683	PF3D7_0323700	Pf3D7_03_v3	991544	-	2082	-0.406	-0.876	0.063	8.96	-1.76	0.0876	0.0876	-4.862	U4/U6.U5 tri-snRNP-associated protein 1, putative	SART1
1327	PF3D7_0603400	Pf3D7_06_v3	133150	-	3312	-0.548	-1.18	0.085	6.188	-1.76	0.0876	0.0876	-4.668	trophozoite exported protein 1	TEX1
2135	PF3D7_0817100	Pf3D7_08_v3	774299	+	2493	0.82	-0.13	1.769	0.177	1.756	0.0883	0.0883	-4.248	tRNA modification GTPase, putative	NA
3245	PF3D7_1113500	Pf3D7_11_v3	524492	+	2097	0.474	-0.075	1.023	5.062	1.755	0.0884	0.0884	-4.575	GTP-binding protein, putative	NA
1677	PF3D7_0704800	Pf3D7_07_v3	238159	-	3894	-0.861	-1.859	0.137	-0.461	-1.755	0.0885	0.0885	-4.242	conserved Plasmodium protein, unknown function	NA
3794	PF3D7_1216700	Pf3D7_12_v3	663061	+	3222	0.463	-0.074	0.999	5.904	1.753	0.0889	0.0889	-4.686	perforin-like protein 2	PLP2
1821	PF3D7_0719100	Pf3D7_07_v3	838990	-	1035	0.518	-0.084	1.121	2.64	1.751	0.0891	0.0891	-4.42	conserved Plasmodium protein, unknown function	NA
1219	PF3D7_0526000	Pf3D7_05_v3	1075913	-	2421	0.708	-0.114	1.53	3.349	1.751	0.0892	0.0892	-4.469	RAP protein, putative	NA
4836	PF3D7_1364800	Pf3D7_13_v3	2603463	-	1510	0.272	-0.044	0.588	7.98	1.751	0.0892	0.0892	-4.822	DNA-directed RNA polymerases I, II, and III subunit RPABC1, putative	RPB5
4677	PF3D7_1348900	Pf3D7_13_v3	1965963	-	360	-0.494	-1.068	0.08	2.665	-1.749	0.0895	0.0895	-4.365	conserved Plasmodium protein, unknown function	NA
119	PF3D7_0107600	Pf3D7_01_v3	314618	+	4788	-0.559	-1.21	0.092	2.976	-1.748	0.0897	0.0897	-4.463	serine/threonine protein kinase, putative	NA
2939	PF3D7_1024200	Pf3D7_10_v3	1021292	-	483	1.297	-0.213	2.807	-1.816	1.747	0.0898	0.0898	-4.205	RNA-binding protein, putative	NA
4427	PF3D7_1324100	Pf3D7_13_v3	997721	+	1542	-0.624	-1.35	0.103	2.433	-1.747	0.0899	0.0899	-4.365	conserved Plasmodium membrane protein, unknown function	NA
3589	PF3D7_1147000	Pf3D7_11_v3	1858329	-	9029	-1.123	-2.431	0.185	1.36	-1.748	0.0899	0.0899	-4.344	sporozoite and liver stage asparagine-rich protein	SLARP
2917	PF3D7_1022000	Pf3D7_10_v3	919772	+	4442	-0.477	-1.034	0.079	6.381	-1.746	0.09	0.09	-4.707	RNA-binding protein, putative	NA
5593	PF3D7_1466100	Pf3D7_14_v3	2690504	+	2823	-0.885	-1.916	0.146	-0.96	-1.746	0.09	0.09	-4.256	protein phosphatase containing kelch-like domains	PPKL
5398	PF3D7_1446800	Pf3D7_14_v3	1922959	+	824	0.851	-0.142	1.844	-0.913	1.743	0.0906	0.0906	-4.244	heme detoxification protein	HDP
5374	PF3D7_1444400	Pf3D7_14_v3	1831009	+	1795	-0.32	-0.693	0.053	4.638	-1.743	0.0906	0.0906	-4.536	conserved Plasmodium protein, unknown function	NA
3118	PF3D7_1100800	Pf3D7_11_v3	59550	+	779	1.365	-0.229	2.959	-2.839	1.742	0.0907	0.0907	-4.197	Pfmc-2TM Maurer's cleft two transmembrane protein	MC-2TM
4010	PF3D7_1238200	Pf3D7_12_v3	1586261	-	1206	-0.608	-1.318	0.102	0.731	-1.741	0.0909	0.0909	-4.284	conserved Plasmodium protein, unknown function	NA
5317	PF3D7_1438700	Pf3D7_14_v3	1564575	+	3265	0.534	-0.09	1.158	3.559	1.741	0.091	0.091	-4.535	DNA primase small subunit	NA
2911	PF3D7_1021400	Pf3D7_10_v3	863907	+	2836	-0.335	-0.727	0.057	8.11	-1.74	0.0911	0.0911	-4.842	endomembrane protein 70, putative	NA
2542	PF3D7_0923400	Pf3D7_09_v3	950408	+	3315	-0.68	-1.476	0.115	6.866	-1.743	0.0911	0.0911	-4.757	conserved Plasmodium protein, unknown function	NA
4724	PF3D7_1353500	Pf3D7_13_v3	2144125	+	981	-0.392	-0.849	0.066	3.693	-1.739	0.0913	0.0913	-4.461	RNA polymerase II transcription factor B subunit 4, putative	TFB4
1283	PF3D7_0532100	Pf3D7_05_v3	1301224	+	546	0.423	-0.072	0.918	10.166	1.738	0.0914	0.0914	-4.964	early transcribed membrane protein 5	ETRAMP5
3709	PF3D7_1208400	Pf3D7_12_v3	390932	+	4695	1.022	-0.175	2.218	0.636	1.738	0.0916	0.0916	-4.358	amino acid transporter, putative	NA
1076	PF3D7_0511800	Pf3D7_05_v3	520720	-	1974	0.446	-0.076	0.969	8.629	1.737	0.0916	0.0916	-4.875	inositol-3-phosphate synthase	INO1
2991	PF3D7_1029300	Pf3D7_10_v3	1197825	-	2208	-0.405	-0.88	0.069	3.011	-1.737	0.0917	0.0917	-4.453	conserved Plasmodium protein, unknown function	NA
2360	PF3D7_0905700	Pf3D7_09_v3	284200	-	2441	0.367	-0.063	0.796	4.926	1.735	0.0919	0.0919	-4.6	autophagy-related protein 3, putative	ATG3
2361	PF3D7_0905700	Pf3D7_09_v3	284200	-	2441	0.367	-0.063	0.796	4.926	1.735	0.0919	0.0919	-4.6	autophagy-related protein 3, putative	ATG3
2362	PF3D7_0905700	Pf3D7_09_v3	284200	-	2441	0.367	-0.063	0.796	4.926	1.735	0.0919	0.0919	-4.6	autophagy-related protein 3, putative	ATG3
1487	PF3D7_0619000	Pf3D7_06_v3	788707	-	7319	0.372	-0.064	0.808	7.802	1.734	0.0922	0.0922	-4.822	conserved Plasmodium protein, unknown function	NA
1488	PF3D7_0619000	Pf3D7_06_v3	788707	-	7319	0.372	-0.064	0.808	7.802	1.734	0.0922	0.0922	-4.822	conserved Plasmodium protein, unknown function	NA
5341	PF3D7_1441100	Pf3D7_14_v3	1673386	-	684	0.272	-0.047	0.591	11.595	1.734	0.0922	0.0922	-5.064	conserved Plasmodium protein, unknown function	NA
218	PF3D7_0201700	Pf3D7_02_v3	81291	-	2875	0.419	-0.073	0.911	8.957	1.733	0.0923	0.0923	-4.914	DnaJ protein, putative	NA
4352	PF3D7_1316700	Pf3D7_13_v3	695732	+	2254	-0.481	-1.046	0.083	3.377	-1.733	0.0923	0.0923	-4.468	conserved Plasmodium protein, unknown function	NA
3460	PF3D7_1134500	Pf3D7_11_v3	1344303	+	5461	-0.448	-0.973	0.078	5.114	-1.733	0.0924	0.0924	-4.585	alpha/beta hydrolase, putative	NA
1628	PF3D7_0632700	Pf3D7_06_v3	1371501	+	1361	0.79	-0.138	1.719	2.005	1.731	0.0926	0.0926	-4.391	rifin	RIF
5664	PF3D7_1473200	Pf3D7_14_v3	2981600	+	1365	-1.174	-2.555	0.207	6.505	-1.741	0.0926	0.0926	-4.703	DnaJ protein, putative	NA
4056	PF3D7_1242800	Pf3D7_12_v3	1805380	-	1977	-0.293	-0.637	0.051	9.096	-1.731	0.0927	0.0927	-4.906	rab specific GDP dissociation inhibitor	rabGDI
157	PF3D7_0111400	Pf3D7_01_v3	436408	+	2157	0.998	-0.175	2.171	-1.454	1.73	0.0929	0.0929	-4.231	conserved Plasmodium protein, unknown function	GEXP19
506	PF3D7_0306400	Pf3D7_03_v3	298517	+	1962	-0.539	-1.174	0.095	2.668	-1.729	0.0931	0.0931	-4.42	FAD-dependent glycerol-3-phosphate dehydrogenase, putative	NA
5046	PF3D7_1412200	Pf3D7_14_v3	487776	-	2605	0.457	-0.081	0.995	5.46	1.728	0.0933	0.0933	-4.697	conserved Plasmodium protein, unknown function	NA
3849	PF3D7_1222200	Pf3D7_12_v3	881970	-	145	-0.822	-1.79	0.146	0.006	-1.728	0.0933	0.0933	-4.271	small nucleolar RNA snoR15	NA
566	PF3D7_0312300	Pf3D7_03_v3	521969	+	915	-0.386	-0.841	0.069	5.045	-1.726	0.0936	0.0936	-4.605	26S proteasome regulatory subunit RPN12, putative	RPN12
1097	PF3D7_0513800	Pf3D7_05_v3	585357	-	624	-1.029	-2.241	0.183	-0.545	-1.726	0.0936	0.0936	-4.254	ras-related protein Rab-1A	RAB1a
899	PF3D7_0420200	Pf3D7_04_v3	910187	+	1785	-0.58	-1.263	0.104	2.434	-1.725	0.0939	0.0939	-4.433	holo-[acyl-carrier-protein] synthase, putative	ACPS
4200	PF3D7_1301900	Pf3D7_13_v3	109695	-	574	-0.985	-2.147	0.178	0.988	-1.723	0.0942	0.0942	-4.328	Plasmodium exported protein, unknown function	NA
220	PF3D7_0201900	Pf3D7_02_v3	91318	-	7521	0.965	-0.176	2.106	8.975	1.733	0.0943	0.0943	-4.946	erythrocyte membrane protein 3	EMP3
1840	PF3D7_0721000	Pf3D7_07_v3	904143	+	10529	-0.393	-0.856	0.071	6.866	-1.722	0.0944	0.0944	-4.785	conserved Plasmodium membrane protein, unknown function	NA
1453	PF3D7_0615700	Pf3D7_06_v3	656376	+	1261	0.469	-0.085	1.024	5.359	1.721	0.0945	0.0945	-4.667	RNA and export factor binding protein, putative	NA
1702	PF3D7_0707300	Pf3D7_07_v3	338885	+	3199	1.218	-0.223	2.659	-0.2	1.721	0.0948	0.0948	-4.304	rhoptry-associated membrane antigen	RAMA
4256	PF3D7_1307300	Pf3D7_13_v3	333597	+	1893	-0.405	-0.884	0.074	4.791	-1.72	0.0948	0.0948	-4.587	ATP-dependent RNA helicase DBP6, putative	DBP6
2479	PF3D7_0917200	Pf3D7_09_v3	716325	+	1182	0.755	-0.139	1.648	-3.509	1.718	0.0952	0.0952	-4.216	conserved Plasmodium membrane protein, unknown function	NA
1279	PF3D7_0531700	Pf3D7_05_v3	1291693	+	359	-1.926	-4.208	0.356	-1.467	-1.722	0.0952	0.0952	-4.233	unspecified product	NA
3518	PF3D7_1139800	Pf3D7_11_v3	1585393	-	6642	-0.411	-0.899	0.076	5.309	-1.716	0.0954	0.0954	-4.62	conserved Plasmodium protein, unknown function	NA
783	PF3D7_0408800	Pf3D7_04_v3	422011	-	948	-0.976	-2.132	0.181	-3.983	-1.715	0.0956	0.0956	-4.21	conserved Plasmodium protein, unknown function	NA
3217	PF3D7_1110700	Pf3D7_11_v3	428362	+	1686	0.49	-0.091	1.072	2.41	1.714	0.0958	0.0958	-4.492	actin-like protein, putative	ALP1
4969	PF3D7_1404800	Pf3D7_14_v3	163990	-	2865	0.29	-0.054	0.634	10.602	1.713	0.0961	0.0961	-5.035	conserved Plasmodium protein, unknown function	NA
5064	PF3D7_1413900	Pf3D7_14_v3	551862	+	1374	-0.434	-0.95	0.081	5.583	-1.713	0.0961	0.0961	-4.66	DnaJ protein, putative	NA
4828	PF3D7_1364000	Pf3D7_13_v3	2564625	+	2484	-0.512	-1.121	0.096	2.56	-1.712	0.0962	0.0962	-4.414	conserved Plasmodium protein, unknown function	NA
3899	PF3D7_1227200	Pf3D7_12_v3	1098129	+	6095	-0.36	-0.787	0.068	5.842	-1.711	0.0963	0.0963	-4.7	potassium channel	K1
1309	PF3D7_0601600	Pf3D7_06_v3	68833	-	861	-0.622	-1.362	0.117	4.087	-1.711	0.0963	0.0963	-4.552	tetratricopeptide repeat protein, putative	NA
861	PF3D7_0416400	Pf3D7_04_v3	718202	+	4453	0.551	-0.104	1.207	5.194	1.71	0.0965	0.0965	-4.666	histone acetyltransferase, putative	HAT1
5691	PF3D7_1476000	Pf3D7_14_v3	3127677	-	443	-0.407	-0.892	0.077	5.367	-1.709	0.0967	0.0967	-4.638	conserved Plasmodium protein, unknown function	NA
404	PF3D7_0219700	Pf3D7_02_v3	783723	-	1106	0.73	-0.14	1.599	6.858	1.712	0.0969	0.0969	-4.824	Plasmodium exported protein (PHISTc), unknown function	GEXP20
85	PF3D7_0104300	Pf3D7_01_v3	190269	+	10962	0.309	-0.059	0.676	10.931	1.708	0.0969	0.0969	-5.074	ubiquitin carboxyl-terminal hydrolase 1, putative	UBP1
2613	PF3D7_0930300	Pf3D7_09_v3	1201812	+	5163	0.882	-0.169	1.933	1.658	1.707	0.097	0.097	-4.417	merozoite surface protein 1	MSP1
4151	PF3D7_1252200	Pf3D7_12_v3	2125435	+	1137	0.564	-0.108	1.235	3.961	1.708	0.097	0.097	-4.619	chitinase	CHT1
5558	PF3D7_1462600	Pf3D7_14_v3	2550692	+	1741	-0.75	-1.642	0.143	-0.686	-1.708	0.097	0.097	-4.284	conserved Plasmodium membrane protein, unknown function	NA
3913	PF3D7_1228600	Pf3D7_12_v3	1160729	-	2232	1.317	-0.253	2.887	0.372	1.71	0.0971	0.0971	-4.342	merozoite surface protein 9	MSP9
1395	PF3D7_0610100	Pf3D7_06_v3	434807	-	1659	-0.267	-0.586	0.051	7.981	-1.707	0.0971	0.0971	-4.879	pre-mRNA-splicing factor SLU7, putative	SLU7
4119	PF3D7_1249000	Pf3D7_12_v3	2005175	-	2019	-0.449	-0.984	0.086	2.761	-1.707	0.0971	0.0971	-4.426	conserved Plasmodium membrane protein, unknown function	NA
5036	PF3D7_1411200	Pf3D7_14_v3	452175	-	2705	0.295	-0.057	0.647	8.205	1.707	0.0972	0.0972	-4.902	rhomboid protease ROM8	ROM8
5729	PF3D7_1479800	Pf3D7_14_v3	3279500	+	1163	-1.23	-2.697	0.238	-2.98	-1.704	0.0977	0.0977	-4.232	rifin	RIF
2882	PF3D7_1018600	Pf3D7_10_v3	737692	-	5715	-0.468	-1.028	0.091	9.242	-1.704	0.0978	0.0978	-4.961	conserved Plasmodium protein, unknown function	NA
4988	PF3D7_1406700	Pf3D7_14_v3	244908	+	585	0.874	-0.17	1.917	-0.891	1.703	0.0979	0.0979	-4.288	vacuolar protein sorting-associated protein 29	VPS29
3944	PF3D7_1231600	Pf3D7_12_v3	1301098	-	3507	-0.485	-1.065	0.094	7.254	-1.703	0.098	0.098	-4.845	pre-mRNA-splicing factor ATP-dependent RNA helicase PRP2, putative	PRP2
4459	PF3D7_1327300	Pf3D7_13_v3	1145719	+	5388	0.659	-0.129	1.446	5.466	1.703	0.0981	0.0981	-4.75	conserved Plasmodium protein, unknown function	NA
2095	PF3D7_0813000	Pf3D7_08_v3	643086	-	1800	-0.251	-0.551	0.049	7.724	-1.701	0.0982	0.0982	-4.87	conserved Plasmodium protein, unknown function	NA
4528	PF3D7_1334000	Pf3D7_13_v3	1390016	-	1338	-0.725	-1.592	0.142	-1.196	-1.701	0.0982	0.0982	-4.29	conserved Plasmodium protein, unknown function	NA
1231	PF3D7_0527100	Pf3D7_05_v3	1129959	-	796	0.298	-0.058	0.655	7.651	1.7	0.0984	0.0984	-4.872	ubiquitin-conjugating enzyme E2 N, putative	UBC13
4385	PF3D7_1320000	Pf3D7_13_v3	829534	+	3777	-0.295	-0.649	0.058	8.442	-1.7	0.0985	0.0985	-4.918	golgi protein 1	GP1
5142	PF3D7_1421500	Pf3D7_14_v3	884398	+	677	-0.585	-1.284	0.115	2.306	-1.699	0.0987	0.0987	-4.404	mitochondrial import inner membrane translocase subunit TIM8, putative	TIM8
5383	PF3D7_1445300	Pf3D7_14_v3	1860148	+	1948	0.454	-0.09	0.999	4.214	1.696	0.0992	0.0992	-4.644	mitochondrial ribosomal protein S29 precursor, putative	NA
5266	PF3D7_1433700	Pf3D7_14_v3	1342484	-	6511	0.76	-0.152	1.672	1.345	1.695	0.0993	0.0993	-4.387	conserved Plasmodium protein, unknown function	NA
3501	PF3D7_1138200	Pf3D7_11_v3	1498208	+	762	0.63	-0.126	1.387	2.522	1.695	0.0993	0.0993	-4.48	conserved Plasmodium membrane protein, unknown function	NA
2756	PF3D7_1006500	Pf3D7_10_v3	270535	+	963	0.785	-0.157	1.727	0.333	1.694	0.0996	0.0996	-4.346	conserved Plasmodium protein, unknown function	NA
3880	PF3D7_1225300	Pf3D7_12_v3	1029862	+	1527	0.321	-0.064	0.707	6.859	1.694	0.0996	0.0996	-4.831	conserved Plasmodium protein, unknown function	NA
4201	PF3D7_1302000	Pf3D7_13_v3	112792	-	1024	0.219	-0.044	0.483	8.832	1.694	0.0996	0.0996	-4.952	EMP1-trafficking protein	PTP6
3457	PF3D7_1134200	Pf3D7_11_v3	1326747	+	5418	-0.324	-0.713	0.065	7.842	-1.694	0.0996	0.0996	-4.885	conserved Plasmodium protein, unknown function	NA
4731	PF3D7_1354200	Pf3D7_13_v3	2160318	-	2412	-0.421	-0.928	0.085	4.596	-1.694	0.0996	0.0996	-4.613	inositol-polyphosphate 5-phosphatase, putative	IP5P
1018	PF3D7_0506000	Pf3D7_05_v3	256225	+	1154	0.382	-0.077	0.841	5.158	1.693	0.0997	0.0997	-4.696	conserved Plasmodium protein, unknown function	NA
5578	PF3D7_1464600	Pf3D7_14_v3	2619679	+	4509	0.302	-0.061	0.665	9.924	1.694	0.0997	0.0997	-5.033	serine/threonine protein phosphatase UIS2, putative	UIS2
1526	PF3D7_0622700	Pf3D7_06_v3	916000	-	1300	-0.938	-2.064	0.189	3.594	-1.694	0.0997	0.0997	-4.491	conserved Plasmodium membrane protein, unknown function	NA
4190	PF3D7_1300900	Pf3D7_13_v3	62515	-	1033	1.424	-0.294	3.141	-2.911	1.686	0.101	0.101	-4.26	stevor	NA
3925	PF3D7_1229800	Pf3D7_12_v3	1219136	-	7330	0.855	-0.175	1.886	-0.903	1.688	0.101	0.101	-4.314	myosin D	MyoD
3069	PF3D7_1037100	Pf3D7_10_v3	1469990	-	2238	0.688	-0.141	1.518	3.745	1.687	0.101	0.101	-4.598	pyruvate kinase 2	PyKII
827	PF3D7_0413100	Pf3D7_04_v3	591949	-	7901	0.59	-0.122	1.303	3.206	1.684	0.101	0.101	-4.551	erythrocyte membrane protein 1, PfEMP1	VAR
1019	PF3D7_0506100	Pf3D7_05_v3	257748	-	1084	0.332	-0.068	0.732	7.312	1.686	0.101	0.101	-4.868	60S ribosomal subunit protein L24-2, putative	NA
2793	PF3D7_1010200	Pf3D7_10_v3	405017	-	5520	-0.295	-0.65	0.061	8.312	-1.687	0.101	0.101	-4.928	DNA2/NAM7 helicase, putative	NA
4530	PF3D7_1334200	Pf3D7_13_v3	1398271	+	1575	-0.309	-0.682	0.063	8.897	-1.688	0.101	0.101	-4.974	chaperone binding protein, putative	NA
5428	PF3D7_1449800	Pf3D7_14_v3	2043009	+	534	-0.367	-0.808	0.075	4.708	-1.689	0.101	0.101	-4.625	conserved Plasmodium protein, unknown function	NA
5313	PF3D7_1438300	Pf3D7_14_v3	1546224	+	74	-1.303	-2.873	0.266	-3.205	-1.689	0.101	0.101	-4.247	tRNA Methionine	NA
4007	PF3D7_1237900	Pf3D7_12_v3	1577181	+	3567	0.365	-0.077	0.807	8.989	1.68	0.102	0.102	-5.009	conserved Plasmodium protein, unknown function	NA
4944	PF3D7_1402500	Pf3D7_14_v3	92264	-	1274	0.321	-0.067	0.71	8.95	1.681	0.102	0.102	-4.98	ubiquitin-40S ribosomal protein S27a, putative	NA
789	PF3D7_0409300	Pf3D7_04_v3	440968	-	3275	-0.374	-0.825	0.078	6.315	-1.683	0.102	0.102	-4.776	conserved Plasmodium protein, unknown function	NA
3679	PF3D7_1205400	Pf3D7_12_v3	232389	-	3258	-0.46	-1.015	0.096	3.922	-1.681	0.102	0.102	-4.559	kelch domain-containing protein, putative	NA
2141	PF3D7_0817700	Pf3D7_08_v3	805797	-	7669	0.86	-0.183	1.903	-0.332	1.678	0.103	0.103	-4.375	rhoptry neck protein 5	RON5
4043	PF3D7_1241500	Pf3D7_12_v3	1771996	-	1263	0.703	-0.149	1.555	4.098	1.677	0.103	0.103	-4.661	conserved Plasmodium protein, unknown function	NA
4092	PF3D7_1246400	Pf3D7_12_v3	1931970	+	615	0.673	-0.144	1.491	3.911	1.675	0.103	0.103	-4.62	myosin A tail domain interacting protein	MTIP
4869	PF3D7_1368100	Pf3D7_13_v3	2710406	-	1313	-0.351	-0.777	0.075	5.634	-1.676	0.103	0.103	-4.737	26S proteasome regulatory subunit RPN11, putative	RPN11
3468	PF3D7_1135100	Pf3D7_11_v3	1374592	-	2070	-0.379	-0.839	0.081	8.08	-1.674	0.103	0.103	-4.932	protein phosphatase PPM8, putative	PPM8
3644	PF3D7_1201900	Pf3D7_12_v3	107338	-	865	-0.41	-0.908	0.088	4.308	-1.676	0.103	0.103	-4.602	conserved protein, unknown function	NA
2280	PF3D7_0831600	Pf3D7_08_v3	1358314	+	5305	-0.494	-1.094	0.105	4.406	-1.677	0.103	0.103	-4.715	cytoadherence linked asexual protein 8	CLAG8
1000	PF3D7_0504200	Pf3D7_05_v3	167649	+	1854	1.144	-0.248	2.537	-2.32	1.672	0.104	0.104	-4.288	ATP-dependent RNA helicase DDX27, putative	DDX27
95	PF3D7_0105300	Pf3D7_01_v3	225110	-	670	0.906	-0.196	2.008	-1.6	1.673	0.104	0.104	-4.315	cyclase-associated protein	CAP
5000	PF3D7_1407900	Pf3D7_14_v3	288297	+	1359	0.334	-0.073	0.74	9.748	1.67	0.104	0.104	-5.052	plasmepsin I	PMI
5456	PF3D7_1452600	Pf3D7_14_v3	2155736	+	10732	-0.339	-0.751	0.073	6.446	-1.673	0.104	0.104	-4.81	conserved Plasmodium protein, unknown function	NA
4671	PF3D7_1348300	Pf3D7_13_v3	1929091	-	4631	-0.395	-0.876	0.086	6.398	-1.669	0.104	0.104	-4.817	elongation factor Tu, putative	NA
5260	PF3D7_1433100	Pf3D7_14_v3	1299894	+	3833	-0.517	-1.146	0.112	3.236	-1.671	0.104	0.104	-4.52	HID1 domain-containing protein, putative	NA
5079	PF3D7_1415400	Pf3D7_14_v3	618897	+	4425	-0.536	-1.188	0.117	5.027	-1.67	0.104	0.104	-4.72	conserved Plasmodium protein, unknown function	NA
1272	PF3D7_0531000	Pf3D7_05_v3	1267410	+	2130	-0.577	-1.279	0.125	4.206	-1.672	0.104	0.104	-4.579	conserved Plasmodium protein, unknown function	NA
4186	PF3D7_1300500	Pf3D7_13_v3	50662	+	1196	-1.061	-2.35	0.229	0.449	-1.673	0.104	0.104	-4.355	rifin	RIF
211	PF3D7_0201000	Pf3D7_02_v3	57344	-	1078	-1.105	-2.451	0.241	-2.025	-1.669	0.104	0.104	-4.29	rifin	RIF
1277	PF3D7_0531500	Pf3D7_05_v3	1288559	+	750	-1.398	-3.101	0.306	-0.59	-1.671	0.104	0.104	-4.339	unspecified product	NA
5549	PF3D7_1461700	Pf3D7_14_v3	2501578	-	938	1.16	-0.256	2.576	-2.171	1.667	0.105	0.105	-4.292	conserved Plasmodium protein, unknown function	NA
224	PF3D7_0202300	Pf3D7_02_v3	117225	+	1011	0.931	-0.204	2.065	2.517	1.67	0.105	0.105	-4.507	Plasmodium exported protein (hyp11), unknown function	NA
2343	PF3D7_0904000	Pf3D7_09_v3	187342	-	1281	-0.236	-0.523	0.052	8.922	-1.666	0.105	0.105	-5.005	GTPase-activating protein, putative	NA
913	PF3D7_0421600	Pf3D7_04_v3	986135	+	1313	-1.32	-2.928	0.289	-1.767	-1.669	0.105	0.105	-4.31	erythrocyte membrane protein 1 (PfEMP1)-like pseudogene	VAR
1949	PF3D7_0731800	Pf3D7_07_v3	1378618	+	2152	-1.856	-4.129	0.417	4.128	-1.674	0.105	0.105	-4.567	alpha/beta hydrolase, putative	GEXP08
4894	PF3D7_1370900	Pf3D7_13_v3	2797507	+	597	1.15	-0.262	2.562	6.294	1.669	0.106	0.106	-4.896	unspecified product	NA
1430	PF3D7_0613400	Pf3D7_06_v3	546964	+	778	1.098	-0.244	2.441	-2.857	1.664	0.106	0.106	-4.291	apicoplast ribosomal protein L18 precursor, putative	NA
3378	PF3D7_1126500	Pf3D7_11_v3	1033062	+	4107	-0.301	-0.67	0.067	8.367	-1.664	0.106	0.106	-4.971	conserved Plasmodium protein, unknown function	NA
5564	PF3D7_1463200	Pf3D7_14_v3	2570434	+	1286	-0.561	-1.247	0.125	2.163	-1.663	0.106	0.106	-4.548	replication factor C subunit 3, putative	RFC3
5167	PF3D7_1424000	Pf3D7_14_v3	973147	-	79	-1.182	-2.628	0.264	-3.354	-1.663	0.106	0.106	-4.274	small nucleolar RNA snoR24	NA
460	PF3D7_0301800	Pf3D7_03_v3	104325	+	957	0.726	-0.166	1.617	7.931	1.663	0.107	0.107	-4.972	Plasmodium exported protein, unknown function	NA
372	PF3D7_0216700	Pf3D7_02_v3	690311	+	5473	0.579	-0.131	1.288	5.593	1.659	0.107	0.107	-4.834	autophagy-related protein 11, putative	ATG11
373	PF3D7_0216700	Pf3D7_02_v3	690311	+	5473	0.579	-0.131	1.288	5.593	1.659	0.107	0.107	-4.834	autophagy-related protein 11, putative	ATG11
1654	PF3D7_0702500	Pf3D7_07_v3	104957	-	1033	0.57	-0.13	1.27	7.643	1.66	0.107	0.107	-4.947	Plasmodium exported protein, unknown function	NA
5232	PF3D7_1430300	Pf3D7_14_v3	1191946	-	7974	0.502	-0.114	1.117	6.645	1.658	0.107	0.107	-4.87	acid phosphatase, putative	NA
3030	PF3D7_1033100	Pf3D7_10_v3	1324132	-	4305	0.316	-0.072	0.705	11.469	1.655	0.107	0.107	-5.183	S-adenosylmethionine decarboxylase/ornithine decarboxylase	AdoMetDC/ODC
4339	PF3D7_1315400	Pf3D7_13_v3	647986	-	2526	0.237	-0.054	0.527	8.901	1.657	0.107	0.107	-5.021	zinc finger (CCCH type) protein, putative	NA
4323	PF3D7_1313800	Pf3D7_13_v3	588800	-	10399	-0.23	-0.512	0.053	8.689	-1.655	0.107	0.107	-5.007	conserved Plasmodium membrane protein, unknown function	NA
638	PF3D7_0319200	Pf3D7_03_v3	803592	-	2721	-0.384	-0.856	0.087	6.612	-1.657	0.107	0.107	-4.843	endonuclease/exonuclease/phosphatase family protein, putative	NA
501	PF3D7_0305900	Pf3D7_03_v3	285579	-	534	-0.98	-2.182	0.222	-2.91	-1.659	0.107	0.107	-4.293	conserved Plasmodium protein, unknown function	NA
703	PF3D7_0400800	Pf3D7_04_v3	66601	-	973	-1.377	-3.067	0.312	-2.798	-1.658	0.107	0.107	-4.289	stevor	NA
1386	PF3D7_0609200	Pf3D7_06_v3	392991	+	1621	0.504	-0.117	1.125	3.077	1.65	0.108	0.108	-4.548	citrate synthase-like protein, putative	NA
4353	PF3D7_1316800	Pf3D7_13_v3	698218	-	1705	-0.293	-0.655	0.068	6.499	-1.651	0.108	0.108	-4.851	protein transport protein SEC20, putative	SEC20
1223	PF3D7_0526300	Pf3D7_05_v3	1085623	-	972	-0.295	-0.658	0.068	6.471	-1.651	0.108	0.108	-4.849	nucleolar Jumonji domain interacting protein, putative	NA
5621	PF3D7_1468900	Pf3D7_14_v3	2831928	-	2442	-0.398	-0.887	0.092	6.467	-1.653	0.108	0.108	-4.836	conserved Plasmodium protein, unknown function	NA
4617	PF3D7_1342900	Pf3D7_13_v3	1682393	-	11577	-0.556	-1.24	0.128	6.215	-1.653	0.108	0.108	-4.825	transcription factor with AP2 domain(s)	ApiAP2
578	PF3D7_0313500	Pf3D7_03_v3	548718	+	2736	-0.59	-1.317	0.136	3.801	-1.652	0.108	0.108	-4.574	Ras-like G protein	PfG
3595	PF3D7_1147600	Pf3D7_11_v3	1893436	-	2408	0.614	-0.144	1.373	0.207	1.647	0.109	0.109	-4.399	conserved Plasmodium protein, unknown function	NA
3365	PF3D7_1125200	Pf3D7_11_v3	989159	-	1143	0.44	-0.104	0.984	4.366	1.646	0.109	0.109	-4.668	conserved Plasmodium protein, unknown function	NA
3303	PF3D7_1119000	Pf3D7_11_v3	718650	-	1116	0.41	-0.097	0.916	4.058	1.645	0.109	0.109	-4.638	acyl-CoA-binding protein, putative	NA
5607	PF3D7_1467500	Pf3D7_14_v3	2755225	+	1575	0.277	-0.065	0.619	6.989	1.649	0.109	0.109	-4.907	DNA/RNA-binding protein KIN17, putative	NA
4862	PF3D7_1367400	Pf3D7_13_v3	2687561	+	3141	-0.325	-0.726	0.077	7.671	-1.645	0.109	0.109	-4.951	conserved Plasmodium protein, unknown function	NA
3337	PF3D7_1122400	Pf3D7_11_v3	849335	+	3236	-0.347	-0.775	0.082	6.612	-1.646	0.109	0.109	-4.871	conserved Plasmodium protein, unknown function	NA
457	PF3D7_0301500	Pf3D7_03_v3	88250	-	982	-0.356	-0.797	0.084	6.36	-1.647	0.109	0.109	-4.834	Plasmodium exported protein, unknown function	NA
1377	PF3D7_0608310	Pf3D7_06_v3	348010	+	1362	-0.472	-1.055	0.11	4.724	-1.649	0.109	0.109	-4.674	sorting assembly machinery 50 kDa subunit, putative	SAM50
883	PF3D7_0418600	Pf3D7_04_v3	834394	+	6036	-0.552	-1.234	0.13	1.862	-1.647	0.109	0.109	-4.48	regulator of chromosome condensation, putative	NA
5447	PF3D7_1451700	Pf3D7_14_v3	2118947	-	1334	0.799	-0.19	1.788	-2.261	1.644	0.11	0.11	-4.339	calcineurin subunit B	CNB
2924	PF3D7_1022700	Pf3D7_10_v3	951752	-	828	0.435	-0.104	0.974	5.023	1.642	0.11	0.11	-4.774	phospholipid scramblase, putative	NA
4274	PF3D7_1309100	Pf3D7_13_v3	418820	+	1302	0.267	-0.063	0.598	9.785	1.644	0.11	0.11	-5.087	60S ribosomal protein L24, putative	NA
287	PF3D7_0208400	Pf3D7_02_v3	343308	-	6033	-0.363	-0.813	0.086	8.221	-1.644	0.11	0.11	-4.985	conserved Plasmodium protein, unknown function	NA
4199	PF3D7_1301800	Pf3D7_13_v3	102842	+	6630	-1.714	-3.845	0.417	5.045	-1.65	0.11	0.11	-4.695	surface-associated interspersed protein 13.1 (SURFIN 13.1), pseudogene	SURF13.1
3314	PF3D7_1120100	Pf3D7_11_v3	761695	+	1124	0.393	-0.095	0.881	10.33	1.638	0.111	0.111	-5.128	phosphoglycerate mutase, putative	PGM1
3964	PF3D7_1233600	Pf3D7_12_v3	1385707	+	16512	0.378	-0.092	0.847	8.168	1.635	0.111	0.111	-5.007	asparagine and aspartate rich protein 1	AARP1
4728	PF3D7_1353900	Pf3D7_13_v3	2154162	+	1056	0.33	-0.08	0.739	6.955	1.639	0.111	0.111	-4.919	proteasome subunit alpha type-7, putative	NA
4758	PF3D7_1357000	Pf3D7_13_v3	2265817	-	1332	0.273	-0.066	0.612	11.901	1.637	0.111	0.111	-5.22	elongation factor 1-alpha	NA
3805	PF3D7_1217700	Pf3D7_12_v3	696895	-	1563	-0.264	-0.592	0.064	7.124	-1.638	0.111	0.111	-4.924	conserved Plasmodium protein, unknown function	NA
699	PF3D7_0400400	Pf3D7_04_v3	45555	-	11306	1.112	-0.274	2.498	4.686	1.641	0.112	0.112	-4.769	erythrocyte membrane protein 1, PfEMP1	VAR
4077	PF3D7_1244900	Pf3D7_12_v3	1877039	+	3003	0.621	-0.152	1.393	1.567	1.634	0.112	0.112	-4.487	conserved Plasmodium protein, unknown function	NA
1573	PF3D7_0627200	Pf3D7_06_v3	1095065	-	1309	0.511	-0.126	1.147	1.783	1.631	0.112	0.112	-4.52	myosin light chain, putative	NA
848	PF3D7_0415100	Pf3D7_04_v3	670883	+	1242	-0.415	-0.933	0.102	4.155	-1.634	0.112	0.112	-4.632	conserved protein, unknown function	NA
1712	PF3D7_0708200	Pf3D7_07_v3	374243	-	3151	-0.621	-1.395	0.152	3.52	-1.633	0.112	0.112	-4.649	conserved Plasmodium protein, unknown function	NA
1523	PF3D7_0622400	Pf3D7_06_v3	911503	+	387	-0.721	-1.62	0.178	-0.348	-1.632	0.112	0.112	-4.385	conserved Apicomplexan protein, unknown function	NA
3141	PF3D7_1103200	Pf3D7_11_v3	143353	+	73	-1.033	-2.321	0.254	-2.217	-1.632	0.112	0.112	-4.335	tRNA Glycine	NA
4697	PF3D7_1350900	Pf3D7_13_v3	2027073	-	1566	-1.048	-2.355	0.259	2.413	-1.634	0.112	0.112	-4.549	transcription factor with AP2 domain(s)	ApiAP2
754	PF3D7_0405800	Pf3D7_04_v3	315562	+	309	1.251	-0.314	2.815	-2.798	1.626	0.113	0.113	-4.336	conserved Plasmodium protein, unknown function	NA
2865	PF3D7_1017000	Pf3D7_10_v3	685578	+	3285	0.758	-0.189	1.704	2.126	1.628	0.113	0.113	-4.569	DNA polymerase delta catalytic subunit	NA
1898	PF3D7_0726900	Pf3D7_07_v3	1145648	+	1560	0.542	-0.136	1.22	3.571	1.627	0.113	0.113	-4.665	mitochondrial import inner membrane translocase subunit TIM50, putative	TIM50
4416	PF3D7_1323000	Pf3D7_13_v3	963661	-	1030	0.485	-0.12	1.09	5.579	1.629	0.113	0.113	-4.861	beta-hydroxyacyl-ACP dehydratase	FabZ
4964	PF3D7_1404500	Pf3D7_14_v3	153139	+	1407	-0.285	-0.64	0.071	7.559	-1.628	0.113	0.113	-4.974	rRNA biogenesis protein RRP5, putative	RRP5
5390	PF3D7_1446000	Pf3D7_14_v3	1889413	+	117	-0.597	-1.343	0.148	1.923	-1.629	0.113	0.113	-4.518	U5 spliceosomal RNA	NA
3520	PF3D7_1140000	Pf3D7_11_v3	1595767	+	1952	-0.724	-1.628	0.18	0.626	-1.629	0.113	0.113	-4.462	carbonic anhydrase	CA
4955	PF3D7_1403600	Pf3D7_14_v3	132554	+	841	1.073	-0.27	2.415	-2.503	1.625	0.114	0.114	-4.348	selenoprotein	Sel1
4258	PF3D7_1307500	Pf3D7_13_v3	338189	-	267	0.734	-0.185	1.653	-2.532	1.625	0.114	0.114	-4.349	conserved Plasmodium protein, unknown function	NA
1475	PF3D7_0617900	Pf3D7_06_v3	754395	+	411	0.293	-0.074	0.661	8.706	1.623	0.114	0.114	-5.06	histone H3 variant	H3.3
1684	PF3D7_0705500	Pf3D7_07_v3	270022	-	8685	0.267	-0.067	0.601	9.313	1.624	0.114	0.114	-5.095	inositol-phosphate phosphatase, putative	NA
1907	PF3D7_0727800	Pf3D7_07_v3	1175944	+	5757	-0.406	-0.915	0.103	6.37	-1.621	0.114	0.114	-4.874	cation transporting ATPase, putative	NA
4787	PF3D7_1359900	Pf3D7_13_v3	2395974	+	6381	-0.432	-0.973	0.11	6.754	-1.621	0.114	0.114	-4.911	conserved Plasmodium membrane protein, unknown function	NA
4978	PF3D7_1405700	Pf3D7_14_v3	196327	-	2160	-0.462	-1.04	0.117	3.757	-1.623	0.114	0.114	-4.618	RING zinc finger protein, putative	NA
4402	PF3D7_1321600	Pf3D7_13_v3	897716	+	3329	-0.757	-1.705	0.191	1.392	-1.624	0.114	0.114	-4.471	phosphodiesterase gamma, putative	PDEgamma
429	PF3D7_0222100	Pf3D7_02_v3	878468	-	784	1.119	-0.286	2.524	-0.759	1.62	0.115	0.115	-4.409	Pfmc-2TM Maurer's cleft two transmembrane protein	MC-2TM
1665	PF3D7_0703600	Pf3D7_07_v3	144019	+	1935	0.443	-0.114	1	3.255	1.618	0.115	0.115	-4.696	conserved Plasmodium protein, unknown function	NA
2810	PF3D7_1011800	Pf3D7_10_v3	455398	+	3420	0.314	-0.081	0.71	12.338	1.617	0.115	0.115	-5.287	PRE-binding protein	PREBP
4120	PF3D7_1249100	Pf3D7_12_v3	2008194	+	1515	0.244	-0.062	0.551	8.268	1.62	0.115	0.115	-5.038	conserved Plasmodium protein, unknown function	NA
2981	PF3D7_1028400	Pf3D7_10_v3	1169940	+	1452	-0.261	-0.589	0.067	7.322	-1.616	0.115	0.115	-4.968	nucleolar preribosomal assembly protein, putative	NA
141	PF3D7_0109800	Pf3D7_01_v3	380697	+	1728	-0.37	-0.836	0.096	6.717	-1.616	0.115	0.115	-4.92	phenylalanine--tRNA ligase alpha subunit	NA
4893	PF3D7_1370800	Pf3D7_13_v3	2796119	+	1026	1.117	-0.295	2.529	5.357	1.619	0.116	0.116	-4.888	unspecified product	NA
3724	PF3D7_1209800	Pf3D7_12_v3	447381	-	570	0.742	-0.193	1.676	1.686	1.614	0.116	0.116	-4.538	ATP synthase mitochondrial F1 complex assembly factor 1, putative	ATP11
1653	PF3D7_0702400	Pf3D7_07_v3	101694	+	592	0.56	-0.145	1.266	7.444	1.617	0.116	0.116	-4.989	small exported membrane protein 1	SEMP1
2269	PF3D7_0830500	Pf3D7_08_v3	1296134	-	2195	0.438	-0.114	0.99	10.456	1.614	0.116	0.116	-5.193	sporozoite and liver stage tryptophan-rich protein, putative	TryThrA
4682	PF3D7_1349400	Pf3D7_13_v3	1983823	+	1189	0.332	-0.086	0.751	6.158	1.614	0.116	0.116	-4.885	cytidine and deoxycytidylate deaminase, putative	NA
2854	PF3D7_1015900	Pf3D7_10_v3	637138	+	1874	0.298	-0.078	0.675	11.414	1.613	0.116	0.116	-5.229	enolase	ENO
2964	PF3D7_1026800	Pf3D7_10_v3	1122962	+	1076	0.212	-0.055	0.479	11.409	1.612	0.116	0.116	-5.237	40S ribosomal protein S2	RPS2
3255	PF3D7_1114400	Pf3D7_11_v3	547383	-	1914	1.078	-0.286	2.443	-0.368	1.607	0.117	0.117	-4.423	conserved Plasmodium protein, unknown function	NA
3960	PF3D7_1233200	Pf3D7_12_v3	1360631	-	10007	0.954	-0.253	2.161	0.729	1.608	0.117	0.117	-4.503	conserved Plasmodium protein, unknown function	NA
3961	PF3D7_1233200	Pf3D7_12_v3	1360631	-	10007	0.954	-0.253	2.161	0.729	1.608	0.117	0.117	-4.503	conserved Plasmodium protein, unknown function	NA
4329	PF3D7_1314400	Pf3D7_13_v3	621387	-	490	0.82	-0.217	1.856	0.067	1.608	0.117	0.117	-4.46	conserved Plasmodium protein, unknown function	NA
3579	PF3D7_1145900	Pf3D7_11_v3	1818594	+	2150	0.514	-0.136	1.164	1.507	1.609	0.117	0.117	-4.506	conserved Plasmodium protein, unknown function	NA
2140	PF3D7_0817600	Pf3D7_08_v3	800920	-	3115	0.611	-0.163	1.385	1.1	1.605	0.118	0.118	-4.515	conserved Plasmodium protein, unknown function	NA
4429	PF3D7_1324300	Pf3D7_13_v3	1002748	-	16556	0.376	-0.101	0.853	6.024	1.604	0.118	0.118	-4.911	conserved Plasmodium membrane protein, unknown function	NA
1800	PF3D7_0716900	Pf3D7_07_v3	736370	+	969	0.29	-0.078	0.657	5.607	1.603	0.118	0.118	-4.845	drug/metabolite transporter, putative	DMT2
4373	PF3D7_1318800	Pf3D7_13_v3	774790	-	1956	0.274	-0.073	0.622	8.821	1.605	0.118	0.118	-5.095	translocation protein SEC63	SEC63
1240	PF3D7_0528000	Pf3D7_05_v3	1156205	-	375	-0.352	-0.798	0.094	5.054	-1.603	0.118	0.118	-4.768	proteasome maturation factor UMP1, putative	UMP1
5216	PF3D7_1428800	Pf3D7_14_v3	1133067	+	1334	-0.4	-0.906	0.106	5.021	-1.607	0.118	0.118	-4.782	transcription initiation TFIID-like, putative	NA
5217	PF3D7_1428800	Pf3D7_14_v3	1133067	+	1334	-0.4	-0.906	0.106	5.021	-1.607	0.118	0.118	-4.782	transcription initiation TFIID-like, putative	NA
2666	PF3D7_0935500	Pf3D7_09_v3	1400800	+	1253	-0.457	-1.036	0.121	4.495	-1.607	0.118	0.118	-4.737	Plasmodium exported protein, unknown function	GEXP22
428	PF3D7_0222000	Pf3D7_02_v3	876984	+	849	-0.76	-1.722	0.203	0.316	-1.605	0.118	0.118	-4.46	exported protein family 1	EPF1
1032	PF3D7_0507400	Pf3D7_05_v3	305961	-	462	-0.887	-2.011	0.237	-2.327	-1.605	0.118	0.118	-4.364	conserved Plasmodium protein, unknown function	NA
5306	PF3D7_1437600	Pf3D7_14_v3	1523286	+	1761	-0.938	-2.126	0.251	-2.178	-1.604	0.118	0.118	-4.375	conserved Plasmodium protein, unknown function	NA
5708	PF3D7_1477700	Pf3D7_14_v3	3202931	+	1087	0.97	-0.264	2.204	0.641	1.599	0.119	0.119	-4.549	Plasmodium exported protein (PHISTa), unknown function	Pfg14-748
4202	PF3D7_1302100	Pf3D7_13_v3	121636	-	654	0.896	-0.242	2.033	3.992	1.605	0.119	0.119	-4.72	gamete antigen 27/25	G27/25
2329	PF3D7_0902700	Pf3D7_09_v3	119261	-	1489	0.768	-0.21	1.746	2.209	1.598	0.119	0.119	-4.6	Plasmodium exported protein (PHISTb), unknown function, pseudogene	NA
2753	PF3D7_1006200	Pf3D7_10_v3	262150	-	848	0.418	-0.112	0.948	8.304	1.602	0.119	0.119	-5.065	DNA/RNA-binding protein Alba 3	ALBA3
1567	PF3D7_0626700	Pf3D7_06_v3	1075018	+	1119	0.37	-0.101	0.84	8.645	1.599	0.119	0.119	-5.095	conserved protein, unknown function	NA
124	PF3D7_0108100	Pf3D7_01_v3	330738	+	1971	-0.564	-1.281	0.153	1.719	-1.6	0.119	0.119	-4.529	conserved Plasmodium protein, unknown function	NA
3123	PF3D7_1101300	Pf3D7_11_v3	73244	-	1199	1.035	-0.285	2.356	1.039	1.596	0.12	0.12	-4.53	rifin	RIF
4624	PF3D7_1343600	Pf3D7_13_v3	1721904	-	1782	0.469	-0.129	1.067	2.978	1.595	0.12	0.12	-4.688	UDP-N-acetylglucosamine pyrophosphorylase, putative	NA
1385	PF3D7_0609100	Pf3D7_06_v3	388915	-	1834	0.356	-0.098	0.81	7.986	1.595	0.12	0.12	-5.065	zinc transporter ZIP1, putative	ZIP1
1872	PF3D7_0724200	Pf3D7_07_v3	1019384	-	1284	-0.423	-0.961	0.116	5.247	-1.597	0.12	0.12	-4.816	type 2A phosphatase-associated protein 42, putative	TAP42
2934	PF3D7_1023700	Pf3D7_10_v3	991147	+	2274	-1.159	-2.638	0.32	-0.62	-1.595	0.12	0.12	-4.445	conserved Plasmodium protein, unknown function	NA
412	PF3D7_0220500	Pf3D7_02_v3	823825	-	1040	0.543	-0.151	1.237	5.388	1.592	0.121	0.121	-4.882	Plasmodium exported protein (hyp2), unknown function	NA
158	PF3D7_0111500	Pf3D7_01_v3	439652	-	1767	0.515	-0.143	1.172	1.304	1.592	0.121	0.121	-4.55	UMP-CMP kinase, putative	NA
1201	PF3D7_0524200	Pf3D7_05_v3	1008636	-	769	-0.424	-0.966	0.118	1.039	-1.592	0.121	0.121	-4.546	conserved Plasmodium membrane protein, unknown function	NA
5623	PF3D7_1469100	Pf3D7_14_v3	2837319	+	783	-0.587	-1.335	0.162	3.555	-1.593	0.121	0.121	-4.657	conserved Plasmodium protein, unknown function	NA
844	PF3D7_0414700	Pf3D7_04_v3	660624	+	1896	0.676	-0.19	1.541	0.971	1.587	0.122	0.122	-4.536	GTP-binding protein, putative	NA
4575	PF3D7_1338700	Pf3D7_13_v3	1561255	-	1869	0.618	-0.173	1.41	0.403	1.589	0.122	0.122	-4.504	conserved Plasmodium protein, unknown function	NA
87	PF3D7_0104500	Pf3D7_01_v3	204622	-	834	0.462	-0.13	1.053	6.163	1.588	0.122	0.122	-4.926	conserved protein, unknown function	NA
2039	PF3D7_0807600	Pf3D7_08_v3	389596	-	4664	0.232	-0.065	0.529	9.807	1.588	0.122	0.122	-5.177	conserved Plasmodium protein, unknown function	NA
4141	PF3D7_1251200	Pf3D7_12_v3	2092087	+	2145	-0.411	-0.939	0.116	3.702	-1.586	0.122	0.122	-4.778	coronin	NA
298	PF3D7_0209400	Pf3D7_02_v3	388424	-	2188	-0.628	-1.433	0.177	4.637	-1.587	0.122	0.122	-4.747	conserved protein, unknown function	NA
433	PF3D7_0222500	Pf3D7_02_v3	889660	+	1086	-1.089	-2.482	0.305	-2.467	-1.589	0.122	0.122	-4.384	rifin	RIF
2489	PF3D7_0918200	Pf3D7_09_v3	748678	-	1585	0.507	-0.145	1.16	7.427	1.582	0.123	0.123	-5.045	50S ribosomal protein L3, apicoplast, putative	NA
973	PF3D7_0501400	Pf3D7_05_v3	74509	+	5334	0.447	-0.128	1.021	11.206	1.584	0.123	0.123	-5.286	interspersed repeat antigen	FIRA
539	PF3D7_0309700	Pf3D7_03_v3	409102	-	1827	0.437	-0.124	0.997	6.806	1.584	0.123	0.123	-5.011	SECIS-binding protein 2, putative	SBP2
4812	PF3D7_1362400	Pf3D7_13_v3	2495924	+	6147	-0.25	-0.573	0.072	8.52	-1.58	0.123	0.123	-5.106	calpain	Pcalp
234	PF3D7_0203200	Pf3D7_02_v3	158137	-	1524	-0.323	-0.739	0.092	5.753	-1.584	0.123	0.123	-4.875	conserved Plasmodium protein, unknown function	NA
4354	PF3D7_1316900	Pf3D7_13_v3	701047	-	2877	-0.344	-0.785	0.098	7.084	-1.583	0.123	0.123	-4.993	conserved Plasmodium protein, unknown function	NA
5071	PF3D7_1414600	Pf3D7_14_v3	590626	+	1563	-0.491	-1.121	0.14	6.401	-1.583	0.123	0.123	-4.935	mRNA-capping enzyme subunit alpha	Pgt1
2808	PF3D7_1011600	Pf3D7_10_v3	445164	-	1962	-0.645	-1.474	0.185	2.343	-1.581	0.123	0.123	-4.575	conserved Plasmodium protein, unknown function	NA
4257	PF3D7_1307400	Pf3D7_13_v3	335852	-	1412	-0.661	-1.51	0.188	-0.16	-1.583	0.123	0.123	-4.457	conserved Plasmodium protein, unknown function	NA
2216	PF3D7_0825200	Pf3D7_08_v3	1093690	+	800	-0.7	-1.598	0.199	-2.316	-1.584	0.123	0.123	-4.411	translation initiation factor IF-3	IF3a
160	PF3D7_0111700	Pf3D7_01_v3	443585	-	354	-0.939	-2.145	0.268	-3.465	-1.583	0.123	0.123	-4.363	conserved Plasmodium protein, unknown function	NA
273	PF3D7_0207000	Pf3D7_02_v3	277494	-	963	0.74	-0.213	1.692	0.152	1.579	0.124	0.124	-4.517	merozoite surface protein 4	MSP4
4195	PF3D7_1301400	Pf3D7_13_v3	82718	+	1301	0.705	-0.206	1.615	8.158	1.581	0.124	0.124	-5.101	Plasmodium exported protein (hyp12), unknown function	HYP12
1452	PF3D7_0615600	Pf3D7_06_v3	646637	-	8960	-0.346	-0.793	0.1	7.712	-1.578	0.124	0.124	-5.046	conserved Plasmodium protein, unknown function	NA
1305	PF3D7_0601200	Pf3D7_06_v3	47463	+	799	1.049	-0.308	2.406	-0.444	1.572	0.125	0.125	-4.478	Pfmc-2TM Maurer's cleft two transmembrane protein	MC-2TM
1287	PF3D7_0532500	Pf3D7_05_v3	1316342	+	505	0.881	-0.258	2.019	-0.492	1.574	0.125	0.125	-4.474	Plasmodium exported protein, unknown function	NA
2814	PF3D7_1012200	Pf3D7_10_v3	470979	+	955	0.852	-0.248	1.952	-1.723	1.575	0.125	0.125	-4.453	rhoptry associated adhesin	RA
792	PF3D7_0409600	Pf3D7_04_v3	452134	-	3438	0.445	-0.131	1.02	4.771	1.572	0.125	0.125	-4.834	replication protein A1, large subunit	RPA1
129	PF3D7_0108600	Pf3D7_01_v3	349995	-	1632	0.367	-0.107	0.841	4.602	1.574	0.125	0.125	-4.844	conserved Plasmodium protein, unknown function	NA
2237	PF3D7_0827300	Pf3D7_08_v3	1181295	+	2502	-0.348	-0.798	0.102	6.823	-1.573	0.125	0.125	-4.984	conserved Plasmodium protein, unknown function	NA
2569	PF3D7_0926000	Pf3D7_09_v3	1043542	+	4253	-0.384	-0.879	0.112	4.495	-1.575	0.125	0.125	-4.829	protein kinase, putative	NA
4063	PF3D7_1243500	Pf3D7_12_v3	1820881	-	1715	0.619	-0.184	1.421	1.285	1.567	0.126	0.126	-4.566	vacuolar-sorting protein SNF7, putative	SNF7
3444	PF3D7_1132900	Pf3D7_11_v3	1273407	+	603	0.496	-0.147	1.14	1.338	1.568	0.126	0.126	-4.565	glycine cleavage system H protein	GCVH
118	PF3D7_0107500	Pf3D7_01_v3	304362	-	4896	0.333	-0.099	0.764	10.626	1.568	0.126	0.126	-5.26	lipid/sterol:H+ symporter	NA
5135	PF3D7_1420900	Pf3D7_14_v3	865346	-	1460	-0.442	-1.016	0.131	3.147	-1.568	0.126	0.126	-4.747	mannose-1-phosphate guanyltransferase, putative	NA
5370	PF3D7_1444000	Pf3D7_14_v3	1800831	+	1057	-0.835	-1.915	0.246	-2.238	-1.571	0.126	0.126	-4.406	conserved Plasmodium protein, unknown function	NA
600	PF3D7_0315500	Pf3D7_03_v3	632846	-	699	1.034	-0.308	2.377	-2.36	1.567	0.127	0.127	-4.416	mitochondrial ribosomal protein L29/L47 precursor, putative	NA
1622	PF3D7_0632100	Pf3D7_06_v3	1338218	-	1200	1.018	-0.304	2.339	-2.575	1.566	0.127	0.127	-4.414	rifin	RIF
4081	PF3D7_1245300	Pf3D7_12_v3	1893069	+	835	0.892	-0.267	2.052	1.085	1.565	0.127	0.127	-4.573	NEDD8-conjugating enzyme UBC12, putative	UBC12
304	PF3D7_0210000	Pf3D7_02_v3	409983	+	246	0.302	-0.09	0.694	6.174	1.565	0.127	0.127	-4.949	secretory complex protein 61 gamma subunit	Sec61-gamma
2166	PF3D7_0820200	Pf3D7_08_v3	912264	-	1986	-0.348	-0.799	0.104	6.718	-1.566	0.127	0.127	-4.992	phosphatidylglycerophosphate synthase	PGPS
5498	PF3D7_1456700	Pf3D7_14_v3	2323772	-	2055	-0.452	-1.041	0.136	6.679	-1.563	0.127	0.127	-4.991	conserved Plasmodium protein, unknown function	NA
1146	PF3D7_0518700	Pf3D7_05_v3	774075	-	6364	-1.103	-2.537	0.331	3.012	-1.57	0.127	0.127	-4.693	mRNA-binding protein PUF1	PUF1
5665	PF3D7_1473300	Pf3D7_14_v3	2984062	+	3871	-1.222	-2.812	0.368	0.225	-1.565	0.127	0.127	-4.506	conserved Plasmodium protein, unknown function	NA
1959	PF3D7_0732800	Pf3D7_07_v3	1410435	+	1797	1.315	-0.401	3.032	1.726	1.566	0.128	0.128	-4.634	erythrocyte membrane protein 1 (PfEMP1), exon 2	NA
3284	PF3D7_1117200	Pf3D7_11_v3	654762	+	5659	0.54	-0.163	1.244	1.892	1.562	0.128	0.128	-4.647	conserved Plasmodium protein, unknown function	NA
4935	PF3D7_1401600	Pf3D7_14_v3	61364	-	1625	0.488	-0.147	1.123	9.057	1.564	0.128	0.128	-5.175	Plasmodium exported protein (PHISTb), unknown function	NA
1233	PF3D7_0527300	Pf3D7_05_v3	1135976	-	1895	0.262	-0.079	0.604	7.12	1.562	0.128	0.128	-5.046	methionine aminopeptidase 1a, putative	METAP1a
2099	PF3D7_0813400	Pf3D7_08_v3	658493	-	3603	0.259	-0.078	0.596	10.613	1.563	0.128	0.128	-5.26	conserved Plasmodium protein, unknown function	NA
5514	PF3D7_1458300	Pf3D7_14_v3	2391783	-	5049	-0.429	-0.988	0.13	1.888	-1.561	0.128	0.128	-4.593	conserved Plasmodium protein, unknown function	NA
235	PF3D7_0203300	Pf3D7_02_v3	160514	+	729	-0.52	-1.198	0.158	2.435	-1.56	0.128	0.128	-4.596	ERCC1 nucleotide excision repair protein, putative	ERCC1
525	PF3D7_0308300	Pf3D7_03_v3	365659	-	1014	-0.664	-1.529	0.202	0.333	-1.559	0.128	0.128	-4.505	conserved Plasmodium protein, unknown function	NA
515	PF3D7_0307300	Pf3D7_03_v3	318804	+	1533	-0.787	-1.813	0.239	1.077	-1.56	0.128	0.128	-4.566	EB1 homolog, putative	NA
56	PF3D7_0101400	Pf3D7_01_v3	75982	-	828	-0.882	-2.031	0.266	0.417	-1.563	0.128	0.128	-4.525	exported protein family 1, pseudogene	EPF1
5669	PF3D7_1473700	Pf3D7_14_v3	2998594	-	3762	-1.476	-3.402	0.451	6.902	-1.572	0.128	0.128	-5.007	nucleoporin NUP116/NSP116, putative	NUP116
113	PF3D7_0107000	Pf3D7_01_v3	293642	+	1327	0.771	-0.235	1.778	-1.072	1.559	0.129	0.129	-4.472	centrin-1	CEN1
5019	PF3D7_1409700	Pf3D7_14_v3	377285	-	2898	0.574	-0.177	1.325	0.985	1.555	0.129	0.129	-4.56	conserved Plasmodium protein, unknown function	NA
3077	PF3D7_1037900	Pf3D7_10_v3	1502955	-	1368	0.553	-0.169	1.274	3.699	1.558	0.129	0.129	-4.746	conserved Plasmodium protein, unknown function	NA
4486	PF3D7_1330000	Pf3D7_13_v3	1272213	+	1647	0.45	-0.138	1.038	4.821	1.555	0.129	0.129	-4.843	thioredoxin, putative	NA
4487	PF3D7_1330000	Pf3D7_13_v3	1272213	+	1647	0.45	-0.138	1.038	4.821	1.555	0.129	0.129	-4.843	thioredoxin, putative	NA
4066	PF3D7_1243800	Pf3D7_12_v3	1831484	-	1466	0.305	-0.093	0.704	6.205	1.558	0.129	0.129	-4.969	WD repeat-containing protein 82, putative	WDR82
2884	PF3D7_1018800	Pf3D7_10_v3	750215	+	2451	-0.372	-0.859	0.115	5.083	-1.555	0.129	0.129	-4.901	conserved protein, unknown function	NA
1292	PF3D7_0533000	Pf3D7_05_v3	1329555	+	1254	-0.809	-1.866	0.247	1.867	-1.558	0.129	0.129	-4.65	rifin, pseudogene	RIF
2331	PF3D7_0902900	Pf3D7_09_v3	127416	+	309	1.075	-0.334	2.484	-1.038	1.552	0.13	0.13	-4.474	conserved Plasmodium protein, unknown function	NA
2159	PF3D7_0819500	Pf3D7_08_v3	881590	+	2801	0.63	-0.196	1.455	2.052	1.551	0.13	0.13	-4.677	conserved protein, unknown function	NA
3892	PF3D7_1226500	Pf3D7_12_v3	1072459	+	4518	0.454	-0.141	1.048	2.389	1.553	0.13	0.13	-4.66	RAP protein, putative	NA
5134	PF3D7_1420800	Pf3D7_14_v3	863623	-	1198	0.636	-0.2	1.473	-0.225	1.548	0.131	0.131	-4.535	dynein-associated protein, putative	NA
2162	PF3D7_0819800	Pf3D7_08_v3	891658	-	6845	0.545	-0.171	1.261	2.605	1.549	0.131	0.131	-4.732	conserved Plasmodium protein, unknown function	NA
788	PF3D7_0409200	Pf3D7_04_v3	438887	+	1449	-0.291	-0.672	0.091	7.803	-1.549	0.131	0.131	-5.105	protein SOF1, putative	SOF1
4713	PF3D7_1352400	Pf3D7_13_v3	2087393	+	4785	-0.303	-0.702	0.095	6.06	-1.548	0.131	0.131	-4.952	conserved Plasmodium protein, unknown function	NA
4940	PF3D7_1402100	Pf3D7_14_v3	81121	+	2640	-0.463	-1.071	0.145	4.851	-1.548	0.131	0.131	-4.834	conserved Plasmodium protein, unknown function	NA
4313	PF3D7_1312800	Pf3D7_13_v3	536702	-	7822	-0.742	-1.718	0.233	2.795	-1.548	0.131	0.131	-4.722	conserved Plasmodium protein, unknown function	NA
47	PF3D7_0100500	Pf3D7_01_v3	53169	-	112	-1.183	-2.736	0.369	-3.031	-1.55	0.131	0.131	-4.412	erythrocyte membrane protein 1 (PfEMP1), exon 1, pseudogene	NA
2813	PF3D7_1012100	Pf3D7_10_v3	468071	-	1466	0.794	-0.252	1.841	-0.192	1.544	0.132	0.132	-4.535	conserved Plasmodium protein, unknown function	NA
5288	PF3D7_1435800	Pf3D7_14_v3	1452604	+	1515	0.657	-0.21	1.525	-0.274	1.542	0.132	0.132	-4.525	GTPase Era, putative	ERA
4768	PF3D7_1358000	Pf3D7_13_v3	2297900	-	6295	0.517	-0.164	1.197	3.884	1.544	0.132	0.132	-4.866	patatin-like phospholipase, putative	NA
2875	PF3D7_1017900	Pf3D7_10_v3	715878	+	1560	-0.236	-0.547	0.075	6.563	-1.544	0.132	0.132	-5.006	26S proteasome regulatory subunit p55, putative	RPN5
1042	PF3D7_0508400	Pf3D7_05_v3	344931	+	1814	-0.617	-1.429	0.196	2.794	-1.544	0.132	0.132	-4.725	transcription factor IIb, putative	NA
3818	PF3D7_1219000	Pf3D7_12_v3	746002	+	8925	-0.8	-1.855	0.255	5.499	-1.547	0.132	0.132	-4.939	formin 2	NA
4924	PF3D7_1400600	Pf3D7_14_v3	20897	-	1336	-1.149	-2.662	0.364	0.714	-1.547	0.132	0.132	-4.56	rifin	RIF
3432	PF3D7_1131700	Pf3D7_11_v3	1225688	-	787	0.832	-0.266	1.929	-2.09	1.541	0.133	0.133	-4.455	conserved Plasmodium protein, unknown function	NA
222	PF3D7_0202100	Pf3D7_02_v3	109564	-	1017	0.587	-0.189	1.363	7.23	1.541	0.133	0.133	-5.085	liver stage associated protein 2	LSAP2
3266	PF3D7_1115500	Pf3D7_11_v3	588169	+	1232	0.494	-0.158	1.145	5.887	1.541	0.133	0.133	-4.998	transcription factor with AP2 domain(s), putative	ApiAP2
3608	PF3D7_1148800	Pf3D7_11_v3	1941348	+	1241	0.451	-0.145	1.048	6.856	1.538	0.133	0.133	-5.062	Plasmodium exported protein (hyp11), unknown function	NA
5353	PF3D7_1442300	Pf3D7_14_v3	1712626	-	1440	0.221	-0.071	0.513	8.406	1.538	0.133	0.133	-5.163	tRNA import protein tRIP	tRIP
5255	PF3D7_1432600	Pf3D7_14_v3	1285667	-	3588	-0.374	-0.868	0.12	5.157	-1.539	0.133	0.133	-4.896	conserved Plasmodium protein, unknown function	NA
3201	PF3D7_1109100	Pf3D7_11_v3	382569	-	4582	-0.513	-1.19	0.164	2.548	-1.541	0.133	0.133	-4.736	conserved Plasmodium protein, unknown function	NA
722	PF3D7_0402600	Pf3D7_04_v3	159279	-	1036	0.919	-0.298	2.135	-2.572	1.536	0.134	0.134	-4.457	stevor	NA
3581	PF3D7_1146100	Pf3D7_11_v3	1824148	-	1432	0.734	-0.237	1.705	0.231	1.537	0.134	0.134	-4.546	conserved Plasmodium protein, unknown function	NA
4714	PF3D7_1352500	Pf3D7_13_v3	2093365	-	973	0.317	-0.103	0.736	6.708	1.536	0.134	0.134	-5.056	thioredoxin-related protein, putative	NA
4741	PF3D7_1355300	Pf3D7_13_v3	2195449	+	1530	-0.368	-0.856	0.12	6.298	-1.535	0.134	0.134	-5.007	histone-lysine N-methyltransferase, putative	SET6
1008	PF3D7_0505000	Pf3D7_05_v3	209062	-	9128	-0.385	-0.894	0.125	6.679	-1.534	0.134	0.134	-5.033	conserved Plasmodium membrane protein, unknown function	NA
1376	PF3D7_0608300	Pf3D7_06_v3	343212	+	4296	-0.65	-1.51	0.211	2.836	-1.536	0.134	0.134	-4.699	conserved Plasmodium protein, unknown function	NA
5181	PF3D7_1425400	Pf3D7_14_v3	989220	+	3711	0.954	-0.314	2.221	-1.101	1.53	0.135	0.135	-4.489	DEAD/DEAH box helicase, putative	NA
2696	PF3D7_1000700	Pf3D7_10_v3	54542	-	957	0.849	-0.279	1.977	-1.513	1.53	0.135	0.135	-4.501	Plasmodium exported protein (PHISTa), unknown function, pseudogene	NA
5089	PF3D7_1416400	Pf3D7_14_v3	661098	-	4001	0.623	-0.205	1.451	4.107	1.531	0.135	0.135	-4.878	conserved Plasmodium protein, unknown function	NA
2178	PF3D7_0821400	Pf3D7_08_v3	965822	+	836	0.345	-0.113	0.802	6.464	1.532	0.135	0.135	-5.04	conserved Plasmodium protein, unknown function	NA
5477	PF3D7_1454700	Pf3D7_14_v3	2241433	+	1407	-0.308	-0.717	0.101	8.072	-1.532	0.135	0.135	-5.132	6-phosphogluconate dehydrogenase, decarboxylating, putative	NA
633	PF3D7_0318700	Pf3D7_03_v3	788453	+	360	-0.512	-1.191	0.168	0.714	-1.531	0.135	0.135	-4.579	trophozoite stage antigen	NA
905	PF3D7_0420800	Pf3D7_04_v3	944951	+	135	-0.864	-2.011	0.283	-4.46	-1.532	0.135	0.135	-4.411	Plasmodium RNA of unknown function RUF6	NA
1797	PF3D7_0716600	Pf3D7_07_v3	725296	+	1924	0.9	-0.3	2.101	0.971	1.526	0.136	0.136	-4.618	cysteine desulfurase	SufS
478	PF3D7_0303600	Pf3D7_03_v3	190180	+	540	0.821	-0.273	1.916	0.58	1.526	0.136	0.136	-4.56	plasmoredoxin	Plrx
481	PF3D7_0303900	Pf3D7_03_v3	196570	-	869	0.77	-0.255	1.795	-3.475	1.527	0.136	0.136	-4.437	phosphatidylethanolamine-binding protein, putative	NA
2181	PF3D7_0821700	Pf3D7_08_v3	973586	+	682	0.259	-0.086	0.604	8.85	1.527	0.136	0.136	-5.202	60S ribosomal protein L22, putative	NA
4822	PF3D7_1363400	Pf3D7_13_v3	2543644	-	2840	-0.286	-0.666	0.095	6.848	-1.526	0.136	0.136	-5.071	polyubiquitin binding protein, putative	DOA1
3771	PF3D7_1214400	Pf3D7_12_v3	610271	-	499	-0.378	-0.882	0.126	4.456	-1.526	0.136	0.136	-4.814	ER membrane protein complex subunit 6, putative	EMC6
2543	PF3D7_0923500	Pf3D7_09_v3	956605	+	1231	-0.624	-1.455	0.206	1.562	-1.529	0.136	0.136	-4.622	cyclin-dependent kinases regulatory subunit, putative	NA
4453	PF3D7_1326700	Pf3D7_13_v3	1125280	+	1629	-0.711	-1.656	0.235	5.761	-1.532	0.136	0.136	-4.934	conserved Apicomplexan protein, unknown function	NA
1507	PF3D7_0620900	Pf3D7_06_v3	861685	-	81	-1.066	-2.485	0.353	-3.597	-1.528	0.136	0.136	-4.425	tRNA Leucine	NA
687	PF3D7_0324100	Pf3D7_03_v3	1007413	-	790	1.25	-0.417	2.918	-1.587	1.526	0.137	0.137	-4.488	Pfmc-2TM Maurer's cleft two transmembrane protein	MC-2TM
132	PF3D7_0108900	Pf3D7_01_v3	361987	-	600	0.911	-0.303	2.125	-3.53	1.525	0.137	0.137	-4.439	unspecified product	NA
1918	PF3D7_0728800	Pf3D7_07_v3	1230589	+	1592	0.71	-0.237	1.657	0.961	1.524	0.137	0.137	-4.611	conserved Plasmodium protein, unknown function	NA
3676	PF3D7_1205100	Pf3D7_12_v3	222695	-	2297	0.649	-0.217	1.515	4.576	1.525	0.137	0.137	-4.883	O-phosphoseryl-tRNA(Sec) selenium transferase, putative	SEPSECS
2472	PF3D7_0916500	Pf3D7_09_v3	691568	-	2003	0.519	-0.174	1.213	2.96	1.524	0.137	0.137	-4.747	ubiquitin fusion degradation protein 1	UFD1
520	PF3D7_0307800	Pf3D7_03_v3	337179	+	2100	-0.616	-1.44	0.207	5.521	-1.523	0.137	0.137	-4.947	conserved Plasmodium protein, unknown function	NA
237	PF3D7_0203500	Pf3D7_02_v3	164269	+	72	-0.765	-1.785	0.255	-4.653	-1.525	0.137	0.137	-4.417	tRNA Glutamine	NA
1657	PF3D7_0702800	Pf3D7_07_v3	112049	+	84	-0.786	-1.834	0.263	-3.039	-1.524	0.137	0.137	-4.447	tRNA Tyrosine	NA
3856	PF3D7_1222900	Pf3D7_12_v3	923527	+	1672	1.166	-0.394	2.726	-2.071	1.521	0.138	0.138	-4.474	conserved Plasmodium protein, unknown function	NA
1371	PF3D7_0607800	Pf3D7_06_v3	329537	-	2189	1.037	-0.35	2.424	-2.511	1.521	0.138	0.138	-4.466	GTP-binding protein, putative	NA
183	PF3D7_0114100	Pf3D7_01_v3	547597	-	784	1.028	-0.347	2.403	-0.82	1.521	0.138	0.138	-4.519	Pfmc-2TM Maurer's cleft two transmembrane protein	MC-2TM
4904	PF3D7_1372100	Pf3D7_13_v3	2837053	+	2006	0.667	-0.226	1.559	2.369	1.519	0.138	0.138	-4.777	Plasmodium exported protein (PHISTb), unknown function	GEXP04
219	PF3D7_0201800	Pf3D7_02_v3	86832	-	1960	0.28	-0.095	0.655	9.205	1.519	0.138	0.138	-5.243	knob associated heat shock protein 40	KAHsp40
1707	PF3D7_0707700	Pf3D7_07_v3	357700	+	2886	-0.216	-0.506	0.073	8.27	-1.52	0.138	0.138	-5.174	E3 ubiquitin-protein ligase, putative	NA
982	PF3D7_0502300	Pf3D7_05_v3	107075	-	864	-0.894	-2.091	0.303	-1.826	-1.518	0.138	0.138	-4.487	conserved Plasmodium protein, unknown function	NA
833	PF3D7_0413700	Pf3D7_04_v3	619786	-	1017	0.494	-0.168	1.155	3.939	1.517	0.139	0.139	-4.829	lysine decarboxylase-like protein, putative	NA
1783	PF3D7_0715200	Pf3D7_07_v3	676061	-	6621	1.094	-0.378	2.566	-1.839	1.511	0.14	0.14	-4.508	conserved Plasmodium protein, unknown function	NA
654	PF3D7_0320800	Pf3D7_03_v3	870817	+	1526	0.65	-0.225	1.525	0.936	1.511	0.14	0.14	-4.639	ATP-dependent RNA helicase DDX6	DOZI
2517	PF3D7_0921000	Pf3D7_09_v3	857587	-	1243	0.386	-0.133	0.906	5.983	1.512	0.14	0.14	-5.008	ubiquitin-conjugating enzyme, putative	NA
2518	PF3D7_0921000	Pf3D7_09_v3	857587	-	1243	0.386	-0.133	0.906	5.983	1.512	0.14	0.14	-5.008	ubiquitin-conjugating enzyme, putative	NA
5454	PF3D7_1452400	Pf3D7_14_v3	2148421	+	2703	-0.278	-0.651	0.096	7.673	-1.51	0.14	0.14	-5.146	conserved Plasmodium protein, unknown function	NA
1126	PF3D7_0516700	Pf3D7_05_v3	694492	+	4287	-0.354	-0.83	0.122	7.954	-1.511	0.14	0.14	-5.157	ubiquitin carboxyl-terminal hydrolase 2, putative	NA
5465	PF3D7_1453500	Pf3D7_14_v3	2194694	-	3787	-0.453	-1.061	0.156	2.586	-1.513	0.14	0.14	-4.726	pyridine nucleotide transhydrogenase, putative	NA
3947	PF3D7_1231900	Pf3D7_12_v3	1321980	+	3261	-0.512	-1.201	0.177	3.66	-1.511	0.14	0.14	-4.78	conserved Plasmodium protein, unknown function	NA
4668	PF3D7_1348000	Pf3D7_13_v3	1919834	-	4166	-0.846	-1.984	0.291	-0.451	-1.513	0.14	0.14	-4.563	conserved Plasmodium protein, unknown function	NA
4038	PF3D7_1241000	Pf3D7_12_v3	1745289	-	135	-1.05	-2.463	0.364	-2.874	-1.51	0.14	0.14	-4.464	Plasmodium RNA of unknown function RUF6	NA
732	PF3D7_0403600	Pf3D7_04_v3	197846	-	3363	0.977	-0.343	2.296	1.074	1.508	0.141	0.141	-4.671	conserved Plasmodium protein, unknown function	NA
761	PF3D7_0406600	Pf3D7_04_v3	346308	+	420	0.854	-0.297	2.006	-3.459	1.509	0.141	0.141	-4.457	conserved Plasmodium protein, unknown function	NA
1566	PF3D7_0626600	Pf3D7_06_v3	1073458	-	438	0.463	-0.162	1.089	4.419	1.506	0.141	0.141	-4.89	conserved Plasmodium protein, unknown function	NA
3185	PF3D7_1107500	Pf3D7_11_v3	320128	-	1078	0.448	-0.157	1.052	5.128	1.506	0.141	0.141	-4.943	prefoldin, putative	NA
2977	PF3D7_1028000	Pf3D7_10_v3	1160031	+	3391	0.406	-0.142	0.954	6.547	1.507	0.141	0.141	-5.092	methyltransferase, putative	NA
3167	PF3D7_1105700	Pf3D7_11_v3	247451	+	1521	0.276	-0.096	0.648	8.408	1.509	0.141	0.141	-5.213	tRNA-splicing ligase RtcB, putative	RTCB
3988	PF3D7_1236000	Pf3D7_12_v3	1502836	+	1233	-0.413	-0.97	0.144	3.048	-1.508	0.141	0.141	-4.734	vesicle transport v-SNARE protein VTI1, putative	NA
3037	PF3D7_1033800	Pf3D7_10_v3	1351197	+	2088	-0.631	-1.481	0.22	0.421	-1.508	0.141	0.141	-4.605	plasmepsin VII	NA
5280	PF3D7_1435100	Pf3D7_14_v3	1415941	-	1080	-0.781	-1.834	0.272	-3.361	-1.509	0.141	0.141	-4.459	ribonuclease H2 subunit B, putative	NA
1116	PF3D7_0515700	Pf3D7_05_v3	653966	-	1371	0.881	-0.309	2.07	0.466	1.505	0.142	0.142	-4.625	glideosome-associated protein 40, putative	GAP40
5490	PF3D7_1455900	Pf3D7_14_v3	2290887	-	1805	0.851	-0.298	2	-2.485	1.506	0.142	0.142	-4.481	polyprenol reductase, putative	NA
2894	PF3D7_1019700	Pf3D7_10_v3	800278	-	3225	0.643	-0.227	1.514	1.02	1.503	0.142	0.142	-4.662	conserved Plasmodium protein, unknown function	NA
4636	PF3D7_1344800	Pf3D7_13_v3	1796274	+	1436	0.357	-0.125	0.838	6.772	1.505	0.142	0.142	-5.12	aspartate carbamoyltransferase	ATCase
2148	PF3D7_0818400	Pf3D7_08_v3	835978	-	871	0.332	-0.117	0.782	7.774	1.504	0.142	0.142	-5.171	rRNA-processing protein FCF1, putative	FCF1
5323	PF3D7_1439300	Pf3D7_14_v3	1594505	+	5557	-0.312	-0.734	0.11	6.376	-1.505	0.142	0.142	-5.043	Sad1/UNC domain-containing protein, putative	NA
4874	PF3D7_1368600	Pf3D7_13_v3	2725669	-	279	-0.405	-0.951	0.142	4.066	-1.505	0.142	0.142	-4.834	mitochondrial import inner membrane translocase subunit TIM9, putative	TIM9
2082	PF3D7_0811800	Pf3D7_08_v3	593649	-	1764	-0.574	-1.35	0.203	1.685	-1.503	0.142	0.142	-4.661	conserved Plasmodium protein, unknown function	NA
2350	PF3D7_0904700	Pf3D7_09_v3	218675	-	788	-0.609	-1.431	0.214	-0.04	-1.505	0.142	0.142	-4.562	bacterial histone-like protein	HU
1281	PF3D7_0531900	Pf3D7_05_v3	1292211	+	199	-1.218	-2.866	0.431	-0.067	-1.505	0.142	0.142	-4.548	unspecified product	NA
598	PF3D7_0315300	Pf3D7_03_v3	623446	+	6915	0.63	-0.225	1.485	0.078	1.499	0.143	0.143	-4.611	conserved Plasmodium protein, unknown function	NA
3641	PF3D7_1201600	Pf3D7_12_v3	101581	-	1044	0.416	-0.148	0.979	1.139	1.501	0.143	0.143	-4.679	NIMA related kinase 3	NEK3
1530	PF3D7_0623100	Pf3D7_06_v3	939660	-	4061	0.216	-0.077	0.508	10.041	1.5	0.143	0.143	-5.324	nuclear polyadenylated RNA-binding protein NAB2, putative	NAB2
205	PF3D7_0200400	Pf3D7_02_v3	38287	-	1017	1.081	-0.388	2.551	-3.119	1.496	0.144	0.144	-4.478	stevor	NA
440	PF3D7_0223300	Pf3D7_02_v3	909350	+	1705	1.016	-0.365	2.396	2.138	1.501	0.144	0.144	-4.729	erythrocyte membrane protein 1 (PfEMP1), exon 2	NA
2091	PF3D7_0812600	Pf3D7_08_v3	631584	-	646	-0.367	-0.866	0.131	4.077	-1.498	0.144	0.144	-4.829	ubiquitin-conjugating enzyme, putative	NA
1873	PF3D7_0724300	Pf3D7_07_v3	1021508	+	1123	-0.599	-1.412	0.215	1.238	-1.497	0.144	0.144	-4.625	3-demethylubiquinone-9 3-methyltransferase, putative	COQ3
2580	PF3D7_0927100	Pf3D7_09_v3	1100253	-	579	0.822	-0.297	1.94	-1.965	1.494	0.145	0.145	-4.504	conserved Plasmodium protein, unknown function	NA
779	PF3D7_0408400	Pf3D7_04_v3	406233	-	1677	0.7	-0.253	1.653	-2.379	1.494	0.145	0.145	-4.504	conserved Plasmodium protein, unknown function	NA
4848	PF3D7_1366000	Pf3D7_13_v3	2635213	+	276	-0.536	-1.268	0.195	3.728	-1.491	0.145	0.145	-4.803	conserved Plasmodium protein, unknown function	NA
5393	PF3D7_1446300	Pf3D7_14_v3	1898351	+	3576	-0.537	-1.268	0.194	5.388	-1.494	0.145	0.145	-4.966	conserved Plasmodium membrane protein, unknown function	NA
5681	PF3D7_1475000	Pf3D7_14_v3	3075788	+	399	-0.9	-2.126	0.327	-1.377	-1.492	0.145	0.145	-4.505	mediator of RNA polymerase II transcription subunit 31, putative	MED31
5426	PF3D7_1449600	Pf3D7_14_v3	2035116	-	1515	-0.464	-1.097	0.17	3.162	-1.488	0.146	0.146	-4.782	conserved Plasmodium protein, unknown function	NA
3968	PF3D7_1234000	Pf3D7_12_v3	1411607	-	1498	0.523	-0.193	1.239	2.071	1.485	0.147	0.147	-4.716	conserved Plasmodium protein, unknown function	NA
969	PF3D7_0501100	Pf3D7_05_v3	58037	-	1690	0.311	-0.115	0.736	9.391	1.484	0.147	0.147	-5.308	heat shock protein 40, type II	HSP40
970	PF3D7_0501100	Pf3D7_05_v3	58037	-	1690	0.311	-0.115	0.736	9.391	1.484	0.147	0.147	-5.308	heat shock protein 40, type II	HSP40
1092	PF3D7_0513300	Pf3D7_05_v3	569182	-	738	-0.658	-1.559	0.244	7.898	-1.49	0.147	0.147	-5.176	purine nucleoside phosphorylase	PNP
3524	PF3D7_1140400	Pf3D7_11_v3	1608006	+	604	1.039	-0.388	2.466	-1.543	1.481	0.148	0.148	-4.523	conserved Plasmodium protein, unknown function	NA
3318	PF3D7_1120500	Pf3D7_11_v3	772539	+	2504	0.306	-0.114	0.727	6.983	1.481	0.148	0.148	-5.148	tRNA nucleotidyltransferase, putative	NA
2437	PF3D7_0913000	Pf3D7_09_v3	569124	-	1251	0.205	-0.076	0.487	7.368	1.482	0.148	0.148	-5.173	conserved protein, unknown function	NA
2173	PF3D7_0820900	Pf3D7_08_v3	939583	-	5063	-0.253	-0.6	0.094	7.132	-1.482	0.148	0.148	-5.149	conserved Plasmodium protein, unknown function	NA
1101	PF3D7_0514200	Pf3D7_05_v3	596818	+	2604	-0.424	-1.007	0.158	4.744	-1.482	0.148	0.148	-4.915	conserved Plasmodium protein, unknown function	NA
4238	PF3D7_1305500	Pf3D7_13_v3	271411	+	2316	-0.489	-1.161	0.182	2.446	-1.481	0.148	0.148	-4.701	mitogen-activated protein kinase phosphatase 1, putative	MKP1
2689	PF3D7_0937800	Pf3D7_09_v3	1495579	-	7758	-0.523	-1.242	0.195	5.257	-1.481	0.148	0.148	-5.002	erythrocyte membrane protein 1, PfEMP1	VAR
1591	PF3D7_0629000	Pf3D7_06_v3	1194304	-	876	-0.954	-2.264	0.356	-1.16	-1.481	0.148	0.148	-4.542	N-acetyltransferase, putative	NA
2870	PF3D7_1017400	Pf3D7_10_v3	697970	-	1854	0.532	-0.2	1.263	8.21	1.481	0.149	0.149	-5.231	phosphomannomutase, putative	PMM
1830	PF3D7_0720000	Pf3D7_07_v3	876795	+	706	0.301	-0.114	0.717	6.053	1.476	0.149	0.149	-5.064	exosome complex component CSL4, putative	CSL4
2476	PF3D7_0916900	Pf3D7_09_v3	705357	+	999	0.288	-0.108	0.683	6.899	1.478	0.149	0.149	-5.149	conserved Plasmodium protein, unknown function	NA
684	PF3D7_0323800	Pf3D7_03_v3	998649	+	2934	-0.26	-0.618	0.098	8.035	-1.476	0.149	0.149	-5.216	conserved Plasmodium protein, unknown function	NA
1671	PF3D7_0704200	Pf3D7_07_v3	191309	-	3582	-0.325	-0.772	0.122	5.803	-1.477	0.149	0.149	-5.021	tRNA m5C-methyltransferase, putative	NA
2623	PF3D7_0931200	Pf3D7_09_v3	1258549	+	903	-0.364	-0.865	0.137	3.699	-1.479	0.149	0.149	-4.825	selenoprotein	Sel2
103	PF3D7_0106000	Pf3D7_01_v3	255775	-	2769	-0.504	-1.197	0.189	2.315	-1.478	0.149	0.149	-4.751	conserved Plasmodium protein, unknown function	NA
3050	PF3D7_1035100	Pf3D7_10_v3	1391445	+	1686	-0.698	-1.659	0.264	-0.474	-1.475	0.149	0.149	-4.603	probable protein, unknown function	NA
67	PF3D7_0102500	Pf3D7_01_v3	110750	-	5050	-1.188	-2.824	0.448	1.122	-1.481	0.149	0.149	-4.68	erythrocyte binding antigen-181	EBA181
5326	PF3D7_1439600	Pf3D7_14_v3	1612521	-	543	0.723	-0.274	1.719	-1.284	1.475	0.15	0.15	-4.584	conserved Plasmodium protein, unknown function	NA
1270	PF3D7_0530800	Pf3D7_05_v3	1255221	+	2034	0.522	-0.199	1.243	2.354	1.472	0.15	0.15	-4.777	CPW-WPC family protein	NA
3811	PF3D7_1218300	Pf3D7_12_v3	717955	+	1866	0.429	-0.162	1.02	6.907	1.475	0.15	0.15	-5.167	AP-2 complex subunit mu, putative	AP2-MU
1849	PF3D7_0721900	Pf3D7_07_v3	939715	-	536	0.352	-0.134	0.838	5.498	1.475	0.15	0.15	-5.041	V-type ATPase V0 subunit e, putative	NA
2190	PF3D7_0822600	Pf3D7_08_v3	997055	+	2475	0.334	-0.127	0.795	8.953	1.473	0.15	0.15	-5.299	protein transport protein SEC23	SEC23
4665	PF3D7_1347700	Pf3D7_13_v3	1908960	+	1926	0.319	-0.122	0.759	8.886	1.472	0.15	0.15	-5.295	ethanolamine-phosphate cytidylyltransferase	ECT
2785	PF3D7_1009400	Pf3D7_10_v3	381361	+	1089	-0.362	-0.862	0.138	5.806	-1.473	0.15	0.15	-5.043	zinc finger protein, putative	ZNF2
2198	PF3D7_0823400	Pf3D7_08_v3	1034417	+	2012	-0.429	-1.021	0.163	0.98	-1.473	0.15	0.15	-4.697	alpha/beta hydrolase, putative	NA
3007	PF3D7_1030900	Pf3D7_10_v3	1251151	-	657	0.408	-0.156	0.972	2.451	1.47	0.151	0.151	-4.786	28 kDa ookinete surface protein	P28
4739	PF3D7_1355100	Pf3D7_13_v3	2187435	+	2790	0.397	-0.152	0.947	4.408	1.471	0.151	0.151	-4.979	DNA replication licensing factor MCM6	MCM6
5727	PF3D7_1479600	Pf3D7_14_v3	3272578	+	1271	-1.416	-3.377	0.546	-1.882	-1.47	0.151	0.151	-4.512	rifin	RIF
1005	PF3D7_0504700	Pf3D7_05_v3	180421	+	7050	1.034	-0.403	2.47	4.239	1.473	0.152	0.152	-5.034	centrosomal protein CEP120, putative	CEP120
3590	PF3D7_1147100	Pf3D7_11_v3	1870415	-	663	0.922	-0.358	2.201	-2.668	1.465	0.152	0.152	-4.522	dynein light chain, putative	NA
4806	PF3D7_1361800	Pf3D7_13_v3	2473530	+	8097	0.757	-0.294	1.807	0.46	1.465	0.152	0.152	-4.655	conserved Plasmodium protein, unknown function	NA
3345	PF3D7_1123200	Pf3D7_11_v3	918228	+	2842	0.468	-0.181	1.118	1.985	1.467	0.152	0.152	-4.74	leucine-rich repeat protein	LRR11
4723	PF3D7_1353400	Pf3D7_13_v3	2139728	+	3495	-0.361	-0.863	0.14	6.083	-1.465	0.152	0.152	-5.069	Ran-binding protein, putative	NA
4774	PF3D7_1358600	Pf3D7_13_v3	2322060	+	3018	-0.373	-0.89	0.144	2.922	-1.467	0.152	0.152	-4.844	zinc finger protein, putative	NA
318	PF3D7_0211300	Pf3D7_02_v3	457130	-	1456	0.894	-0.351	2.139	-2.985	1.461	0.153	0.153	-4.519	ubiquinol-cytochrome-c reductase complex assembly factor 1, putative	NA
583	PF3D7_0313900	Pf3D7_03_v3	562366	-	3291	0.716	-0.28	1.713	-1.729	1.463	0.153	0.153	-4.552	conserved Plasmodium protein, unknown function	NA
1022	PF3D7_0506400	Pf3D7_05_v3	262672	-	1254	0.695	-0.273	1.663	-4.043	1.461	0.153	0.153	-4.496	conserved Plasmodium protein, unknown function	NA
1723	PF3D7_0709200	Pf3D7_07_v3	412343	-	819	0.608	-0.237	1.452	2.484	1.464	0.153	0.153	-4.785	glutaredoxin-like protein	GLP3
2635	PF3D7_0932400	Pf3D7_09_v3	1292117	-	1527	0.576	-0.225	1.378	1.015	1.462	0.153	0.153	-4.717	peptide chain release factor 1	RF1
3712	PF3D7_1208700	Pf3D7_12_v3	403350	+	1465	0.401	-0.156	0.958	3.208	1.463	0.153	0.153	-4.848	conserved protein, unknown function	NA
3505	PF3D7_1138600	Pf3D7_11_v3	1522359	-	1988	0.295	-0.115	0.704	5.673	1.464	0.153	0.153	-5.053	beta-catenin-like protein 1, putative	NA
799	PF3D7_0410300	Pf3D7_04_v3	470528	-	3069	-0.328	-0.785	0.129	6.744	-1.462	0.153	0.153	-5.144	protein phosphatase PPM1, putative	PPM1
4867	PF3D7_1367900	Pf3D7_13_v3	2706499	+	1944	-0.705	-1.686	0.276	-1.406	-1.462	0.153	0.153	-4.589	conserved Plasmodium protein, unknown function	NA
58	PF3D7_0101600	Pf3D7_01_v3	81765	-	1342	-0.76	-1.818	0.297	2.555	-1.463	0.153	0.153	-4.786	rifin	RIF
167	PF3D7_0112400	Pf3D7_01_v3	475888	+	399	-0.775	-1.851	0.302	-3.101	-1.464	0.153	0.153	-4.507	unspecified product	NA
4903	PF3D7_1372000	Pf3D7_13_v3	2832952	+	1371	-1.311	-3.14	0.517	2.816	-1.468	0.153	0.153	-4.85	Plasmodium exported protein (PHISTa), unknown function	NA
307	PF3D7_0210200	Pf3D7_02_v3	413278	-	7860	0.611	-0.24	1.462	4.34	1.459	0.154	0.154	-4.931	conserved Plasmodium protein, unknown function	NA
2258	PF3D7_0829400	Pf3D7_08_v3	1257716	-	1326	0.604	-0.239	1.448	1.591	1.458	0.154	0.154	-4.729	prolyl 4-hydroxylase subunit alpha, putative	NA
358	PF3D7_0215300	Pf3D7_02_v3	628642	-	2667	-0.36	-0.861	0.142	7.387	-1.459	0.154	0.154	-5.198	acyl-CoA synthetase	ACS8
1912	PF3D7_0728300	Pf3D7_07_v3	1213841	-	636	-0.884	-2.116	0.349	-2.494	-1.459	0.154	0.154	-4.526	conserved Plasmodium protein, unknown function	NA
511	PF3D7_0306900	Pf3D7_03_v3	310652	+	1154	0.267	-0.106	0.64	10.049	1.456	0.155	0.155	-5.378	40S ribosomal protein S23, putative	NA
1129	PF3D7_0517000	Pf3D7_05_v3	715765	-	911	0.247	-0.098	0.592	9.552	1.454	0.155	0.155	-5.343	60S ribosomal protein L12, putative	NA
3938	PF3D7_1231000	Pf3D7_12_v3	1271140	+	3716	-0.442	-1.06	0.176	3.109	-1.454	0.155	0.155	-4.848	conserved Plasmodium protein, unknown function	NA
1758	PF3D7_0712700	Pf3D7_07_v3	577945	+	135	-0.78	-1.871	0.31	-4.533	-1.456	0.155	0.155	-4.488	Plasmodium RNA of unknown function RUF6	NA
2080	PF3D7_0811600	Pf3D7_08_v3	582983	-	3971	-0.982	-2.355	0.391	2.955	-1.459	0.155	0.155	-4.844	conserved Plasmodium protein, unknown function	NA
4400	PF3D7_1321500	Pf3D7_13_v3	890106	-	4677	0.675	-0.271	1.621	-0.722	1.451	0.156	0.156	-4.627	3',5'-cyclic nucleotide phosphodiesterase, putative	PDEbeta
4401	PF3D7_1321500	Pf3D7_13_v3	890106	-	4677	0.675	-0.271	1.621	-0.722	1.451	0.156	0.156	-4.627	3',5'-cyclic nucleotide phosphodiesterase, putative	PDEbeta
5404	PF3D7_1447400	Pf3D7_14_v3	1937706	-	1412	0.469	-0.187	1.125	3.884	1.453	0.156	0.156	-4.906	conserved Plasmodium protein, unknown function	NA
528	PF3D7_0308600	Pf3D7_03_v3	372632	+	1599	-0.286	-0.686	0.114	7.652	-1.452	0.156	0.156	-5.224	pre-mRNA-processing factor 19, putative	PRPF19
1336	PF3D7_0604300	Pf3D7_06_v3	182216	+	2322	-0.356	-0.854	0.143	4.733	-1.452	0.156	0.156	-4.956	conserved Plasmodium protein, unknown function	NA
1094	PF3D7_0513500	Pf3D7_05_v3	573588	+	661	-0.386	-0.927	0.155	4.16	-1.451	0.156	0.156	-4.891	mitochondrial import inner membrane translocase subunit TIM16, putative	PAM16
3975	PF3D7_1234700	Pf3D7_12_v3	1446375	-	3961	-0.548	-1.317	0.22	3.926	-1.451	0.156	0.156	-4.9	CPW-WPC family protein	NA
5038	PF3D7_1411400	Pf3D7_14_v3	461401	-	6051	-0.585	-1.405	0.234	1.483	-1.453	0.156	0.156	-4.694	plastid replication-repair enzyme	PREX
3530	PF3D7_1141000	Pf3D7_11_v3	1644911	+	2472	-0.947	-2.276	0.381	-1.661	-1.45	0.156	0.156	-4.57	conserved Plasmodium protein, unknown function	NA
1647	PF3D7_0701800	Pf3D7_07_v3	75918	-	1138	1.25	-0.504	3.004	-3.205	1.449	0.157	0.157	-4.519	rifin	RIF
721	PF3D7_0402500	Pf3D7_04_v3	155877	+	1108	1.04	-0.421	2.502	-2.624	1.448	0.157	0.157	-4.545	rifin, pseudogene	RIF
745	PF3D7_0404900	Pf3D7_04_v3	267244	-	1137	0.399	-0.162	0.96	5.373	1.447	0.157	0.157	-5.074	6-cysteine protein	P41
3687	PF3D7_1206200	Pf3D7_12_v3	275744	-	3593	0.191	-0.077	0.46	10.294	1.449	0.157	0.157	-5.408	eukaryotic translation initiation factor 3 subunit C, putative	EIF3C
1521	PF3D7_0622200	Pf3D7_06_v3	903740	-	2583	-0.3	-0.722	0.121	7.822	-1.448	0.157	0.157	-5.231	radical SAM protein, putative	NA
1679	PF3D7_0705000	Pf3D7_07_v3	246259	-	3894	-0.325	-0.781	0.132	9.779	-1.447	0.157	0.157	-5.379	mRNA cap guanine-N7 methyltransferase, putative	NA
1048	PF3D7_0509000	Pf3D7_05_v3	376855	-	1598	-0.378	-0.91	0.153	6.148	-1.447	0.157	0.157	-5.11	SNAP protein (soluble N-ethylmaleimide-sensitive factor attachment protein), putative	NA
2825	PF3D7_1013300	Pf3D7_10_v3	515721	-	1887	-0.415	-0.998	0.168	3.832	-1.449	0.157	0.157	-4.872	conserved Plasmodium protein, unknown function	NA
3095	PF3D7_1039800	Pf3D7_10_v3	1594503	-	775	-0.679	-1.632	0.275	-1.561	-1.448	0.157	0.157	-4.547	exported protein family 3	EPF3
1296	PF3D7_0600300	Pf3D7_06_v3	15065	-	1346	-0.731	-1.759	0.297	2.704	-1.447	0.157	0.157	-4.805	rifin	RIF
5538	PF3D7_1460700	Pf3D7_14_v3	2475501	-	973	0.203	-0.083	0.49	9.939	1.443	0.158	0.158	-5.391	60S ribosomal protein L27	RPL27
2806	PF3D7_1011400	Pf3D7_10_v3	441140	-	816	-0.444	-1.069	0.181	4.349	-1.445	0.158	0.158	-4.891	proteasome subunit beta type-5	NA
5424	PF3D7_1449400	Pf3D7_14_v3	2020209	-	3929	-0.574	-1.381	0.234	1.654	-1.445	0.158	0.158	-4.788	crossover junction endonuclease MUS81, putative	MUS81
2695	PF3D7_1000600	Pf3D7_10_v3	51349	-	1251	1.136	-0.467	2.738	-0.852	1.443	0.159	0.159	-4.603	rifin	RIF
180	PF3D7_0113800	Pf3D7_01_v3	527107	+	9245	0.675	-0.278	1.629	6.064	1.445	0.159	0.159	-5.164	DBL containing protein, unknown function	NA
5272	PF3D7_1434300	Pf3D7_14_v3	1372903	+	1695	-0.259	-0.626	0.107	10.097	-1.439	0.159	0.159	-5.404	Hsp70/Hsp90 organizing protein	HOP
1703	PF3D7_0707400	Pf3D7_07_v3	343912	+	1992	-0.307	-0.74	0.126	6.175	-1.442	0.159	0.159	-5.12	AAA family ATPase, putative	NA
866	PF3D7_0416900	Pf3D7_04_v3	732452	-	7421	-0.377	-0.911	0.156	5.665	-1.439	0.159	0.159	-5.05	conserved Plasmodium protein, unknown function	NA
3759	PF3D7_1213200	Pf3D7_12_v3	577529	+	837	0.517	-0.214	1.248	2.903	1.438	0.16	0.16	-4.818	conserved Plasmodium protein, unknown function	NA
4639	PF3D7_1345100	Pf3D7_13_v3	1809736	-	786	0.374	-0.155	0.903	5.432	1.436	0.16	0.16	-5.069	thioredoxin 2	TRX2
4004	PF3D7_1237600	Pf3D7_12_v3	1568605	+	1965	0.219	-0.091	0.53	7.589	1.436	0.16	0.16	-5.254	periodic tryptophan protein 1, putative	PWP1
1403	PF3D7_0610900	Pf3D7_06_v3	456747	-	3843	-0.293	-0.707	0.121	8.911	-1.438	0.16	0.16	-5.331	transcription elongation factor SPT5, putative	SPT5
4074	PF3D7_1244600	Pf3D7_12_v3	1868533	-	999	-0.315	-0.762	0.131	4.996	-1.437	0.16	0.16	-5.002	ADP-ribosylation factor GTPase-activating protein, putative	ARFGAP
139	PF3D7_0109600	Pf3D7_01_v3	377874	-	726	-0.411	-0.993	0.17	4.304	-1.439	0.16	0.16	-4.971	cold-shock protein, putative	NA
2303	PF3D7_0900100	Pf3D7_09_v3	20080	+	7806	-0.734	-1.776	0.307	5.28	-1.438	0.16	0.16	-5.057	erythrocyte membrane protein 1, PfEMP1	VAR
527	PF3D7_0308500	Pf3D7_03_v3	369925	+	865	0.554	-0.232	1.34	4.399	1.434	0.161	0.161	-4.992	activator of Hsp90 ATPase, putative	NA
1087	PF3D7_0512800	Pf3D7_05_v3	548406	-	4935	0.549	-0.229	1.328	3.147	1.435	0.161	0.161	-4.852	conserved Plasmodium protein, unknown function	NA
4064	PF3D7_1243600	Pf3D7_12_v3	1825959	+	926	0.295	-0.124	0.715	7.772	1.433	0.161	0.161	-5.265	translation initiation factor SUI1, putative	NA
1006	PF3D7_0504800	Pf3D7_05_v3	187813	-	16920	-0.506	-1.223	0.211	1.896	-1.434	0.161	0.161	-4.809	conserved Plasmodium protein, unknown function	NA
5713	PF3D7_1478200	Pf3D7_14_v3	3219919	-	784	-0.684	-1.654	0.286	-2.8	-1.434	0.161	0.161	-4.555	Plasmodium exported protein, unknown function, pseudogene	NA
2313	PF3D7_0901100	Pf3D7_09_v3	61342	-	1212	1.409	-0.598	3.415	-2.534	1.431	0.162	0.162	-4.569	rifin	RIF
4801	PF3D7_1361400	Pf3D7_13_v3	2464135	-	584	0.959	-0.403	2.322	-2.286	1.432	0.162	0.162	-4.58	actin-depolymerizing factor 2	ADF2
3081	PF3D7_1038200	Pf3D7_10_v3	1511342	+	494	0.467	-0.197	1.13	1.995	1.43	0.162	0.162	-4.78	conserved Plasmodium protein, unknown function	NA
5085	PF3D7_1416000	Pf3D7_14_v3	643914	+	1076	0.418	-0.176	1.011	2.343	1.43	0.162	0.162	-4.807	conserved Plasmodium protein, unknown function	NA
4972	PF3D7_1405100	Pf3D7_14_v3	175503	-	4203	0.393	-0.166	0.953	5.31	1.429	0.162	0.162	-5.052	GTPase-activating protein, putative	NA
3269	PF3D7_1115800	Pf3D7_11_v3	596289	-	915	0.297	-0.126	0.72	9.218	1.429	0.162	0.162	-5.376	conserved Plasmodium protein, unknown function	NA
3009	PF3D7_1031100	Pf3D7_10_v3	1254843	-	744	-0.493	-1.195	0.209	1.374	-1.43	0.162	0.162	-4.719	conserved Plasmodium protein, unknown function	NA
3862	PF3D7_1223500	Pf3D7_12_v3	946864	-	14106	0.208	-0.089	0.505	7.623	1.425	0.163	0.163	-5.268	conserved Plasmodium protein, unknown function	NA
878	PF3D7_0418100	Pf3D7_04_v3	810995	-	3648	-0.278	-0.675	0.119	7.334	-1.425	0.163	0.163	-5.238	conserved Plasmodium protein, unknown function	NA
3959	PF3D7_1233100	Pf3D7_12_v3	1359169	+	408	-0.315	-0.763	0.134	6.063	-1.425	0.163	0.163	-5.149	conserved protein, unknown function	NA
5371	PF3D7_1444100	Pf3D7_14_v3	1801961	-	23366	-0.521	-1.266	0.224	3.64	-1.422	0.164	0.164	-4.987	conserved Plasmodium protein, unknown function	NA
4737	PF3D7_1354800	Pf3D7_13_v3	2180958	-	1842	-0.53	-1.289	0.228	3.323	-1.422	0.164	0.164	-4.874	metacaspase 1	MCA1
5663	PF3D7_1473100	Pf3D7_14_v3	2976211	-	1907	-0.542	-1.317	0.233	5.127	-1.423	0.164	0.164	-5.026	GTPase-activating protein, putative	NA
4304	PF3D7_1312000	Pf3D7_13_v3	511396	+	1212	-0.551	-1.337	0.236	2.156	-1.424	0.164	0.164	-4.851	malonyl CoA-acyl carrier protein transacylase	MCAT
3664	PF3D7_1203800	Pf3D7_12_v3	190105	-	3009	-0.498	-1.213	0.216	0.854	-1.419	0.165	0.165	-4.707	unspecified product	NA
109	PF3D7_0106600	Pf3D7_01_v3	279115	+	900	-0.529	-1.286	0.229	0.939	-1.419	0.165	0.165	-4.761	conserved Plasmodium protein, unknown function	NA
1885	PF3D7_0725600	Pf3D7_07_v3	1083761	+	2087	-0.949	-2.313	0.415	7.988	-1.427	0.165	0.165	-5.281	18S ribosomal RNA	NA
3478	PF3D7_1136100	Pf3D7_11_v3	1415406	+	1809	0.686	-0.298	1.671	-0.181	1.418	0.166	0.166	-4.671	conserved Plasmodium protein, unknown function	NA
2733	PF3D7_1004200	Pf3D7_10_v3	187669	-	9286	0.446	-0.195	1.087	5.833	1.416	0.166	0.166	-5.149	WD repeat-containing protein, putative	NA
126	PF3D7_0108400	Pf3D7_01_v3	344400	-	2141	0.367	-0.16	0.894	5.495	1.418	0.166	0.166	-5.115	mitochondrial carrier protein, putative	NA
127	PF3D7_0108400	Pf3D7_01_v3	344400	-	2141	0.367	-0.16	0.894	5.495	1.418	0.166	0.166	-5.115	mitochondrial carrier protein, putative	NA
5143	PF3D7_1421600	Pf3D7_14_v3	885211	+	2660	-0.34	-0.83	0.149	5.653	-1.415	0.166	0.166	-5.089	conserved Plasmodium protein, unknown function	NA
3018	PF3D7_1031900	Pf3D7_10_v3	1284588	-	2700	-0.736	-1.794	0.322	0.39	-1.415	0.166	0.166	-4.704	conserved Plasmodium protein, unknown function	NA
3727	PF3D7_1210100	Pf3D7_12_v3	455304	-	933	0.59	-0.259	1.438	0.644	1.414	0.167	0.167	-4.732	syntaxin, Qa-SNARE family	SYN2
206	PF3D7_0200500	Pf3D7_02_v3	41515	-	1344	0.569	-0.25	1.387	1.999	1.413	0.167	0.167	-4.813	rifin	RIF
4146	PF3D7_1251700	Pf3D7_12_v3	2106216	-	2078	0.407	-0.18	0.994	3.79	1.411	0.167	0.167	-4.959	tryptophan--tRNA ligase	aTrpRS
5522	PF3D7_1459100	Pf3D7_14_v3	2423907	+	2394	0.329	-0.145	0.804	3.399	1.412	0.167	0.167	-4.946	GTP-binding protein, putative	NA
2062	PF3D7_0809900	Pf3D7_08_v3	508224	-	4205	0.286	-0.125	0.696	5.979	1.414	0.167	0.167	-5.166	JmjC domain containing protein	JmjC1
3482	PF3D7_1136500	Pf3D7_11_v3	1431881	-	3290	0.221	-0.098	0.54	9.618	1.411	0.167	0.167	-5.414	casein kinase 1	CK1
3483	PF3D7_1136500	Pf3D7_11_v3	1431881	-	3290	0.221	-0.098	0.54	9.618	1.411	0.167	0.167	-5.414	casein kinase 1	CK1
470	PF3D7_0302800	Pf3D7_03_v3	148046	-	1260	-0.293	-0.716	0.129	6.693	-1.414	0.167	0.167	-5.208	conserved Plasmodium protein, unknown function	NA
4753	PF3D7_1356500	Pf3D7_13_v3	2239261	+	744	-0.803	-1.959	0.353	-2.266	-1.413	0.167	0.167	-4.591	conserved Plasmodium protein, unknown function	NA
361	PF3D7_0215600	Pf3D7_02_v3	643106	-	1212	0.758	-0.337	1.854	4.59	1.411	0.168	0.168	-5.029	conserved Plasmodium protein, unknown function	NA
3906	PF3D7_1227900	Pf3D7_12_v3	1138608	+	1695	-0.339	-0.828	0.15	5.403	-1.408	0.168	0.168	-5.078	RNA pseudouridylate synthase, putative	NA
3835	PF3D7_1220700	Pf3D7_12_v3	822958	-	4755	-0.675	-1.649	0.3	-0.495	-1.408	0.168	0.168	-4.644	conserved Plasmodium protein, unknown function	NA
1083	PF3D7_0512450	Pf3D7_05_v3	537499	+	1784	-0.894	-2.184	0.396	-2.598	-1.409	0.168	0.168	-4.574	conserved Plasmodium protein, unknown function, pseudogene	NA
935	PF3D7_0423800	Pf3D7_04_v3	1076347	+	1188	0.702	-0.313	1.718	1.572	1.407	0.169	0.169	-4.798	cysteine-rich protective antigen	CyRPA
719	PF3D7_0402300	Pf3D7_04_v3	137640	+	9014	0.566	-0.253	1.384	1.829	1.406	0.169	0.169	-4.798	reticulocyte binding protein homologue 1	RH1
2201	PF3D7_0823700	Pf3D7_08_v3	1041832	-	496	0.379	-0.17	0.927	4.264	1.405	0.169	0.169	-4.999	mitochondrial import receptor subunit TOM7, putative	TOM7
2874	PF3D7_1017800	Pf3D7_10_v3	711016	-	3643	-0.308	-0.754	0.138	4.841	-1.405	0.169	0.169	-5.041	conserved Plasmodium protein, unknown function	NA
5072	PF3D7_1414700	Pf3D7_14_v3	592992	-	4155	-0.342	-0.836	0.152	7.423	-1.407	0.169	0.169	-5.27	ubiquitin carboxyl-terminal hydrolase, putative	NA
3068	PF3D7_1037000	Pf3D7_10_v3	1462351	+	7205	-0.41	-1.002	0.183	5.657	-1.407	0.169	0.169	-5.174	DNA polymerase zeta catalytic subunit, putative	NA
4184	PF3D7_1300300	Pf3D7_13_v3	33959	-	10784	0.832	-0.378	2.041	4.257	1.404	0.17	0.17	-5.035	erythrocyte membrane protein 1, PfEMP1	VAR
1095	PF3D7_0513600	Pf3D7_05_v3	574941	-	3565	0.653	-0.296	1.603	5.573	1.403	0.17	0.17	-5.188	deoxyribodipyrimidine photo-lyase, putative	NA
796	PF3D7_0410000	Pf3D7_04_v3	464732	-	2608	0.643	-0.292	1.579	6.896	1.404	0.17	0.17	-5.258	erythrocyte vesicle protein 1	EVP1
3992	PF3D7_1236400	Pf3D7_12_v3	1522463	+	2170	0.311	-0.14	0.761	7.295	1.402	0.17	0.17	-5.283	conserved Plasmodium protein, unknown function	NA
1415	PF3D7_0612100	Pf3D7_06_v3	509160	-	1971	-0.27	-0.662	0.122	8.745	-1.402	0.17	0.17	-5.366	eukaryotic translation initiation factor 3 subunit L, putative	EIF3L
1225	PF3D7_0526500	Pf3D7_05_v3	1090930	+	4155	-0.324	-0.794	0.146	6.884	-1.403	0.17	0.17	-5.223	conserved Plasmodium protein, unknown function	NA
1155	PF3D7_0519600	Pf3D7_05_v3	812648	+	2268	-0.332	-0.813	0.15	7.199	-1.401	0.17	0.17	-5.26	zinc finger protein, putative	NA
5057	PF3D7_1413200	Pf3D7_14_v3	530135	-	1605	-0.879	-2.155	0.396	2.413	-1.405	0.17	0.17	-4.867	conserved Plasmodium protein, unknown function	NA
2677	PF3D7_0936600	Pf3D7_09_v3	1446929	+	1019	-1.062	-2.607	0.482	6.353	-1.409	0.17	0.17	-5.178	gametocyte exported protein 5	GEXP5
3053	PF3D7_1035400	Pf3D7_10_v3	1404195	+	1065	0.734	-0.332	1.801	0.522	1.4	0.171	0.171	-4.752	merozoite surface protein 3	MSP3
2066	PF3D7_0810300	Pf3D7_08_v3	525058	-	2547	0.571	-0.259	1.401	1.312	1.399	0.171	0.171	-4.815	protein phosphatase PPM5, putative	PPM5
1839	PF3D7_0720900	Pf3D7_07_v3	901549	+	1239	0.482	-0.219	1.184	2.285	1.398	0.171	0.171	-4.841	conserved Plasmodium protein, unknown function	NA
5348	PF3D7_1441800	Pf3D7_14_v3	1702609	-	1201	0.466	-0.211	1.144	2.493	1.401	0.171	0.171	-4.833	vacuolar-sorting protein SNF7, putative	NA
2384	PF3D7_0907800	Pf3D7_09_v3	366925	+	576	0.374	-0.17	0.918	4.164	1.399	0.171	0.171	-5.008	apicoplast ribosomal protein L35 precursor, putative	NA
4519	PF3D7_1333100	Pf3D7_13_v3	1357704	-	2616	-0.759	-1.862	0.345	-0.187	-1.398	0.171	0.171	-4.662	conserved Plasmodium protein, unknown function	NA
1001	PF3D7_0504300	Pf3D7_05_v3	169549	-	1042	0.884	-0.403	2.17	-3.841	1.397	0.172	0.172	-4.565	conserved Plasmodium protein, unknown function	NA
2925	PF3D7_1022800	Pf3D7_10_v3	955883	+	2475	-0.674	-1.655	0.308	-0.854	-1.396	0.172	0.172	-4.695	4-hydroxy-3-methylbut-2-en-1-yl diphosphate synthase	GcpE
3993	PF3D7_1236500	Pf3D7_12_v3	1525407	-	810	0.795	-0.366	1.956	-2.813	1.392	0.173	0.173	-4.602	conserved Plasmodium protein, unknown function	NA
1433	PF3D7_0613700	Pf3D7_06_v3	559349	-	2112	0.777	-0.359	1.914	2.48	1.392	0.173	0.173	-4.887	syntaxin binding protein, putative	NA
2851	PF3D7_1015700	Pf3D7_10_v3	629909	-	2153	0.618	-0.285	1.521	-1.923	1.392	0.173	0.173	-4.626	tubulin binding cofactor c, putative	NA
2852	PF3D7_1015700	Pf3D7_10_v3	629909	-	2153	0.618	-0.285	1.521	-1.923	1.392	0.173	0.173	-4.626	tubulin binding cofactor c, putative	NA
399	PF3D7_0219300	Pf3D7_02_v3	773335	-	420	0.368	-0.17	0.905	3.811	1.391	0.173	0.173	-4.977	conserved Plasmodium protein, unknown function	NA
5579	PF3D7_1464700	Pf3D7_14_v3	2625452	-	1149	-0.264	-0.648	0.121	6.638	-1.393	0.173	0.173	-5.222	ATP synthase (C/AC39) subunit, putative	NA
313	PF3D7_0210800	Pf3D7_02_v3	437755	-	1248	-0.446	-1.097	0.206	6.356	-1.391	0.173	0.173	-5.196	conserved Plasmodium protein, unknown function	NA
1632	PF3D7_0700300	Pf3D7_07_v3	33585	-	1220	1.115	-0.518	2.748	-3.128	1.388	0.174	0.174	-4.586	rifin	RIF
5632	PF3D7_1470000	Pf3D7_14_v3	2868291	-	1066	0.57	-0.264	1.403	-0.099	1.39	0.174	0.174	-4.691	autophagy-related protein 12, putative	ATG12
3317	PF3D7_1120400	Pf3D7_11_v3	769252	-	1349	0.342	-0.158	0.842	7.094	1.39	0.174	0.174	-5.276	alpha/beta hydrolase fold domain containing protein, putative	NA
2729	PF3D7_1003800	Pf3D7_10_v3	172723	-	3708	-0.288	-0.71	0.133	8.116	-1.391	0.174	0.174	-5.331	U5 small nuclear ribonuclear protein, putative	NA
4021	PF3D7_1239300	Pf3D7_12_v3	1645219	+	618	-0.333	-0.82	0.155	4.195	-1.388	0.174	0.174	-4.991	conserved Plasmodium protein, unknown function	NA
2211	PF3D7_0824700	Pf3D7_08_v3	1070988	+	3430	-0.486	-1.198	0.226	1.141	-1.388	0.174	0.174	-4.786	lipase maturation factor, putative	LMF1
1213	PF3D7_0525400	Pf3D7_05_v3	1057651	+	1404	-0.529	-1.303	0.246	-0.509	-1.389	0.174	0.174	-4.714	G-protein coupled receptor, putative	NA
2687	PF3D7_0937600	Pf3D7_09_v3	1486070	+	4118	1.017	-0.477	2.511	1.904	1.389	0.175	0.175	-4.859	erythrocyte membrane protein 1, PfEMP1	VAR
1740	PF3D7_0710900	Pf3D7_07_v3	484838	+	1200	0.452	-0.212	1.117	4.778	1.385	0.175	0.175	-5.071	50S ribosomal protein L1, mitochondrial, putative	RPL1
4480	PF3D7_1329400	Pf3D7_13_v3	1243172	+	3173	0.366	-0.171	0.903	6.109	1.386	0.175	0.175	-5.219	AMP deaminase, putative	NA
3133	PF3D7_1102400	Pf3D7_11_v3	114591	-	1983	-0.364	-0.898	0.17	5.037	-1.385	0.175	0.175	-5.075	phosphopantothenate--cysteine ligase, putative	NA
5377	PF3D7_1444700	Pf3D7_14_v3	1841960	+	947	-0.436	-1.076	0.204	3.129	-1.387	0.175	0.175	-4.943	shikimate dehydrogenase, putative	NA
938	PF3D7_0424100	Pf3D7_04_v3	1082363	-	1788	-0.691	-1.704	0.323	-1.583	-1.386	0.175	0.175	-4.639	reticulocyte binding protein homologue 5	RH5
1280	PF3D7_0531800	Pf3D7_05_v3	1292052	+	159	-0.918	-2.267	0.431	3.264	-1.387	0.175	0.175	-4.905	5.8S ribosomal RNA	NA
445	PF3D7_0300300	Pf3D7_03_v3	49772	-	1381	1.03	-0.486	2.546	0.548	1.384	0.176	0.176	-4.762	erythrocyte membrane protein 1 (PfEMP1), exon 2, pseudogene	VAR
2389	PF3D7_0908300	Pf3D7_09_v3	383650	-	2067	0.823	-0.387	2.032	-0.72	1.384	0.176	0.176	-4.683	conserved protein, unknown function	NA
2390	PF3D7_0908300	Pf3D7_09_v3	383650	-	2067	0.823	-0.387	2.032	-0.72	1.384	0.176	0.176	-4.683	conserved protein, unknown function	NA
2312	PF3D7_0901000	Pf3D7_09_v3	58162	-	1079	0.676	-0.319	1.671	-3.195	1.381	0.176	0.176	-4.601	rifin	RIF
1730	PF3D7_0709900	Pf3D7_07_v3	438557	-	7325	0.515	-0.242	1.273	1.038	1.383	0.176	0.176	-4.821	conserved Plasmodium membrane protein, unknown function	NA
1729	PF3D7_0709800	Pf3D7_07_v3	437900	+	195	0.388	-0.183	0.958	1.836	1.382	0.176	0.176	-4.819	conserved protein, unknown function	NA
4588	PF3D7_1340000	Pf3D7_13_v3	1601698	-	1857	0.332	-0.156	0.821	5.429	1.383	0.176	0.176	-5.18	secreted ookinete protein, putative	PSOP7
2234	PF3D7_0827000	Pf3D7_08_v3	1167579	-	3870	-0.259	-0.64	0.122	9.273	-1.383	0.176	0.176	-5.424	ATP-dependent RNA helicase DBP10, putative	DBP10
4792	PF3D7_1360400	Pf3D7_13_v3	2411357	+	942	-0.356	-0.88	0.167	4.173	-1.384	0.176	0.176	-4.995	conserved Plasmodium protein, unknown function	NA
3355	PF3D7_1124200	Pf3D7_11_v3	957514	-	1686	-0.483	-1.193	0.227	3.764	-1.383	0.176	0.176	-4.976	conserved Plasmodium protein, unknown function	NA
3417	PF3D7_1130300	Pf3D7_11_v3	1166588	+	100	-0.509	-1.257	0.239	2.495	-1.383	0.176	0.176	-4.854	small nucleolar RNA snoR13	NA
2416	PF3D7_0910900	Pf3D7_09_v3	495946	-	1782	-0.569	-1.407	0.268	0.114	-1.382	0.176	0.176	-4.777	DNA primase large subunit, putative	NA
2209	PF3D7_0824500	Pf3D7_08_v3	1066154	+	1319	0.637	-0.303	1.577	1.832	1.378	0.177	0.177	-4.818	conserved Plasmodium protein, unknown function	NA
4298	PF3D7_1311400	Pf3D7_13_v3	487511	+	1314	-0.249	-0.616	0.118	8.331	-1.379	0.177	0.177	-5.378	AP-1 complex subunit mu-1	AP1M1
1531	PF3D7_0623200	Pf3D7_06_v3	946129	+	1116	-0.354	-0.877	0.168	5.862	-1.379	0.177	0.177	-5.161	ferredoxin--NADP reductase	FNR
2576	PF3D7_0926700	Pf3D7_09_v3	1089911	+	2520	-0.389	-0.962	0.185	6.551	-1.379	0.177	0.177	-5.218	glutamine-dependent NAD(+) synthetase, putative	NADSYN
3942	PF3D7_1231400	Pf3D7_12_v3	1290685	-	6385	-0.39	-0.964	0.185	3.627	-1.379	0.177	0.177	-4.956	amino acid transporter, putative	NA
135	PF3D7_0109200	Pf3D7_01_v3	369480	-	699	-0.453	-1.121	0.215	3.572	-1.379	0.177	0.177	-4.936	cleavage and polyadenylation specificity factor subunit 5, putative	NA
2957	PF3D7_1026000	Pf3D7_10_v3	1098455	-	1428	-0.51	-1.263	0.243	6.741	-1.38	0.177	0.177	-5.256	conserved Plasmodium protein, unknown function	NA
16	malmito_rna_1	Pf_M76611	506	-	88	-0.719	-1.778	0.34	-4.266	-1.381	0.177	0.177	-4.566	unspecified product	RNA1
3040	PF3D7_1034100	Pf3D7_10_v3	1362149	-	921	-0.895	-2.216	0.426	-2.745	-1.378	0.177	0.177	-4.597	conserved Plasmodium protein, unknown function	NA
758	PF3D7_0406200	Pf3D7_04_v3	329216	+	474	-1.082	-2.682	0.517	7.61	-1.388	0.177	0.177	-5.307	sexual stage-specific protein precursor	Pfs16
3101	PF3D7_1040400	Pf3D7_10_v3	1612530	+	1206	1.146	-0.55	2.842	-2.382	1.375	0.178	0.178	-4.619	rifin	RIF
820	PF3D7_0412400	Pf3D7_04_v3	545987	-	7824	0.621	-0.296	1.538	3.636	1.378	0.178	0.178	-5	erythrocyte membrane protein 1, PfEMP1	VAR
5444	PF3D7_1451400	Pf3D7_14_v3	2108874	+	3915	-0.307	-0.76	0.147	5.105	-1.376	0.178	0.178	-5.084	transcriptional regulatory protein sir2b	Sir2B
4376	PF3D7_1319100	Pf3D7_13_v3	789437	+	2412	-0.333	-0.824	0.159	6.618	-1.377	0.178	0.178	-5.252	conserved protein, unknown function	NA
1746	PF3D7_0711500	Pf3D7_07_v3	505245	+	2067	-0.576	-1.43	0.277	6.576	-1.377	0.178	0.178	-5.268	regulator of chromosome condensation, putative	NA
1135	PF3D7_0517600	Pf3D7_05_v3	740156	-	879	-0.589	-1.46	0.281	3.78	-1.376	0.178	0.178	-4.968	F-actin-capping protein subunit beta, putative	CPbeta
4030	PF3D7_1240200	Pf3D7_12_v3	1688606	-	2557	0.623	-0.3	1.546	1.873	1.372	0.179	0.179	-4.913	erythrocyte membrane protein 1 (PfEMP1), pseudogene	NA
3404	PF3D7_1129100	Pf3D7_11_v3	1125952	+	1359	0.238	-0.115	0.591	9.846	1.372	0.179	0.179	-5.482	parasitophorous vacuolar protein 1	PV1
5171	PF3D7_1424400	Pf3D7_14_v3	977908	+	1259	0.208	-0.1	0.516	10.559	1.374	0.179	0.179	-5.518	60S ribosomal protein L7-3, putative	NA
2886	PF3D7_1019000	Pf3D7_10_v3	757795	+	7364	-0.279	-0.693	0.135	10.394	-1.372	0.179	0.179	-5.513	eukaryotic translation initiation factor subunit eIF2A, putative	NA
3833	PF3D7_1220500	Pf3D7_12_v3	818703	-	957	-0.362	-0.9	0.175	4.469	-1.372	0.179	0.179	-5.031	ribosome biogenesis protein TSR3, putative	TSR3
4445	PF3D7_1325900	Pf3D7_13_v3	1076161	-	8427	-0.511	-1.267	0.245	0.451	-1.374	0.179	0.179	-4.787	conserved Plasmodium protein, unknown function	NA
4901	PF3D7_1371800	Pf3D7_13_v3	2824302	-	1551	0.494	-0.24	1.227	2.226	1.369	0.18	0.18	-4.924	Plasmodium exported protein, unknown function	NA
4116	PF3D7_1248700	Pf3D7_12_v3	1994775	+	5970	0.464	-0.227	1.155	11.255	1.372	0.18	0.18	-5.588	conserved Plasmodium protein, unknown function	NA
1254	PF3D7_0529400	Pf3D7_05_v3	1199165	+	6023	0.36	-0.175	0.895	4.968	1.368	0.18	0.18	-5.133	conserved Plasmodium protein, unknown function	NA
1255	PF3D7_0529400	Pf3D7_05_v3	1199165	+	6023	0.36	-0.175	0.895	4.968	1.368	0.18	0.18	-5.133	conserved Plasmodium protein, unknown function	NA
2539	PF3D7_0923100	Pf3D7_09_v3	941830	-	669	-0.461	-1.145	0.224	1.981	-1.369	0.18	0.18	-4.827	OTU domain-containing protein, putative	NA
1533	PF3D7_0623400	Pf3D7_06_v3	950223	-	1284	-0.546	-1.357	0.264	0.125	-1.371	0.18	0.18	-4.724	MEI2-like RNA-binding protein, putative	PlasMei2
31	malmito_rna_LSUG	Pf_M76611	283	-	107	-0.774	-1.922	0.375	-3.993	-1.37	0.18	0.18	-4.584	unspecified product	LSUG
5554	PF3D7_1462200	Pf3D7_14_v3	2523919	+	222	-0.901	-2.24	0.438	-2.98	-1.369	0.18	0.18	-4.609	conserved Plasmodium protein, unknown function	NA
4975	PF3D7_1405400	Pf3D7_14_v3	185437	-	4932	0.462	-0.226	1.151	2.71	1.365	0.181	0.181	-4.9	DNA mismatch repair protein, putative	MutS
614	PF3D7_0316800	Pf3D7_03_v3	677842	+	633	0.255	-0.125	0.635	9.171	1.365	0.181	0.181	-5.444	40S ribosomal protein S15A, putative	NA
3684	PF3D7_1205900	Pf3D7_12_v3	264615	-	3249	-0.304	-0.755	0.148	7.979	-1.367	0.181	0.181	-5.367	conserved protein, unknown function	NA
2685	PF3D7_0937400	Pf3D7_09_v3	1477526	+	1211	-0.989	-2.461	0.482	-0.99	-1.367	0.181	0.181	-4.682	rifin	RIF
3122	PF3D7_1101200	Pf3D7_11_v3	70081	-	1209	0.875	-0.431	2.182	-2.476	1.363	0.182	0.182	-4.637	rifin	RIF
5450	PF3D7_1452000	Pf3D7_14_v3	2134298	+	6570	0.461	-0.227	1.149	1.549	1.363	0.182	0.182	-4.861	rhoptry neck protein 2	RON2
1421	PF3D7_0612700	Pf3D7_06_v3	525987	-	1044	0.334	-0.164	0.833	3.09	1.365	0.182	0.182	-4.943	6-cysteine protein	P12
152	PF3D7_0110800	Pf3D7_01_v3	417921	+	1687	0.254	-0.125	0.632	7.841	1.364	0.182	0.182	-5.362	transcription initiation factor TFIIB, putative	NA
3545	PF3D7_1142500	Pf3D7_11_v3	1705696	-	878	0.226	-0.111	0.563	7.265	1.363	0.182	0.182	-5.313	60S ribosomal protein L28	RPL28
5149	PF3D7_1422200	Pf3D7_14_v3	896004	-	936	-0.532	-1.325	0.261	1.575	-1.364	0.182	0.182	-4.793	conserved Plasmodium protein, unknown function	NA
3340	PF3D7_1122700	Pf3D7_11_v3	868388	-	765	-0.626	-1.562	0.309	-1.545	-1.362	0.182	0.182	-4.672	conserved Plasmodium protein, unknown function	NA
4533	PF3D7_1334500	Pf3D7_13_v3	1405731	-	1782	0.683	-0.339	1.705	1.438	1.36	0.183	0.183	-4.831	MSP7-like protein	MSRP6
5351	PF3D7_1442100	Pf3D7_14_v3	1706520	-	993	0.648	-0.321	1.617	1.196	1.36	0.183	0.183	-4.807	replication factor A protein 3, putative	RPA3
3673	PF3D7_1204700	Pf3D7_12_v3	214834	+	862	0.468	-0.231	1.167	1.18	1.361	0.183	0.183	-4.803	conserved Plasmodium protein, unknown function	NA
3793	PF3D7_1216600	Pf3D7_12_v3	659738	-	549	0.767	-0.384	1.918	-3.122	1.355	0.184	0.184	-4.633	cell traversal protein for ookinetes and sporozoites	CelTOS
3627	PF3D7_1200200	Pf3D7_12_v3	26321	-	1367	0.657	-0.329	1.644	2.058	1.356	0.184	0.184	-4.884	rifin	RIF
2007	PF3D7_0804400	Pf3D7_08_v3	245711	+	2223	0.485	-0.242	1.212	3.387	1.356	0.184	0.184	-5.047	methionine aminopeptidase 1c, putative	METAP1c
4150	PF3D7_1252100	Pf3D7_12_v3	2114628	-	7860	0.439	-0.218	1.096	0.831	1.358	0.184	0.184	-4.846	rhoptry neck protein 3	RON3
3349	PF3D7_1123600	Pf3D7_11_v3	936084	+	2139	0.398	-0.198	0.995	5.411	1.357	0.184	0.184	-5.169	RAP protein, putative	NA
5119	PF3D7_1419400	Pf3D7_14_v3	804425	-	6945	0.271	-0.136	0.678	8.239	1.356	0.184	0.184	-5.401	conserved Plasmodium membrane protein, unknown function	NA
1843	PF3D7_0721300	Pf3D7_07_v3	922285	+	2700	-0.273	-0.684	0.137	8.449	-1.355	0.184	0.184	-5.411	ATP-dependent RNA helicase DBP7, putative	DBP7
1226	PF3D7_0526600	Pf3D7_05_v3	1101203	+	13575	-0.874	-2.187	0.439	4.698	-1.36	0.184	0.184	-5.164	conserved Plasmodium protein, unknown function	NA
449	PF3D7_0300700	Pf3D7_03_v3	61445	+	1270	-1.141	-2.856	0.574	2.368	-1.359	0.184	0.184	-4.862	rifin	RIF
1838	PF3D7_0720800	Pf3D7_07_v3	899751	+	1387	0.365	-0.184	0.913	3.57	1.352	0.185	0.185	-5.021	Ham1-like protein, putative	NA
1363	PF3D7_0607000	Pf3D7_06_v3	293864	+	2934	0.244	-0.123	0.612	12.159	1.354	0.185	0.185	-5.648	translation initiation factor IF-2, putative	NA
5139	PF3D7_1421200	Pf3D7_14_v3	875687	-	699	0.224	-0.112	0.56	9.159	1.354	0.185	0.185	-5.453	40S ribosomal protein S25	RPS25
1678	PF3D7_0704900	Pf3D7_07_v3	243898	-	1119	-0.458	-1.147	0.23	2.18	-1.354	0.185	0.185	-4.879	peptide chain release factor 2	RF2
1418	PF3D7_0612400	Pf3D7_06_v3	521228	+	711	0.807	-0.409	2.023	-3.154	1.35	0.186	0.186	-4.626	conserved Plasmodium protein, unknown function	NA
2129	PF3D7_0816500	Pf3D7_08_v3	760138	+	894	0.747	-0.378	1.873	-4.072	1.35	0.186	0.186	-4.605	small heat shock protein HSP20, putative	HSP20
977	PF3D7_0501800	Pf3D7_05_v3	91361	+	3231	0.655	-0.33	1.639	1.092	1.352	0.186	0.186	-4.827	chromosome assembly factor 1	CAF1
4023	PF3D7_1239500	Pf3D7_12_v3	1648667	+	3021	0.631	-0.32	1.581	-0.752	1.35	0.186	0.186	-4.713	DNA gyrase subunit B	GyrB
918	PF3D7_0422100	Pf3D7_04_v3	1001613	+	1158	0.297	-0.15	0.744	5.793	1.351	0.186	0.186	-5.208	transmembrane emp24 domain-containing protein, putative	NA
1826	PF3D7_0719600	Pf3D7_07_v3	858742	-	751	0.24	-0.121	0.6	9.061	1.351	0.186	0.186	-5.452	60S ribosomal protein L11a, putative	NA
3352	PF3D7_1123900	Pf3D7_11_v3	945470	+	679	0.2	-0.101	0.501	8.535	1.351	0.186	0.186	-5.426	splicing factor, putative	NA
4831	PF3D7_1364300	Pf3D7_13_v3	2579159	-	3456	-0.242	-0.607	0.123	7.923	-1.351	0.186	0.186	-5.387	pre-mRNA-splicing factor ATP-dependent RNA helicase PRP16	PRP16
5391	PF3D7_1446100	Pf3D7_14_v3	1889978	-	2131	-0.578	-1.45	0.293	3.477	-1.35	0.186	0.186	-5.057	conserved Plasmodium protein, unknown function	NA
285	PF3D7_0208200	Pf3D7_02_v3	335679	-	903	0.192	-0.098	0.481	7.923	1.347	0.187	0.187	-5.388	KRR1 small subunit processome component, putative	KRR1
3020	PF3D7_1032100	Pf3D7_10_v3	1293499	+	3573	-0.236	-0.593	0.12	8.686	-1.348	0.187	0.187	-5.439	mRNA-decapping enzyme subunit 1, putative	DCP1
5173	PF3D7_1424600	Pf3D7_14_v3	979767	+	70	-0.538	-1.351	0.275	1.131	-1.346	0.187	0.187	-4.795	small nucleolar RNA snoR28	NA
5244	PF3D7_1431500	Pf3D7_14_v3	1238851	-	2745	-0.843	-2.118	0.433	4.486	-1.35	0.187	0.187	-5.111	mitogen-activated protein kinase 1	MAPK1
3134	PF3D7_1102500	Pf3D7_11_v3	119412	-	2095	-1.526	-3.842	0.79	7.124	-1.353	0.187	0.187	-5.31	Plasmodium exported protein (PHISTb), unknown function	GEXP02
1667	PF3D7_0703800	Pf3D7_07_v3	149804	+	3177	-0.431	-1.083	0.221	3.84	-1.343	0.188	0.188	-5.094	conserved Plasmodium protein, unknown function	NA
42	malmito_SSUB	Pf_M76611	390	-	116	-0.757	-1.902	0.388	-3.226	-1.345	0.188	0.188	-4.624	unspecified product	SSUB
3891	PF3D7_1226400	Pf3D7_12_v3	1067470	-	3840	0.338	-0.174	0.851	5.864	1.342	0.189	0.189	-5.24	conserved Plasmodium protein, unknown function	NA
3308	PF3D7_1119500	Pf3D7_11_v3	736069	+	1667	-0.332	-0.835	0.172	5.183	-1.341	0.189	0.189	-5.157	AP-4 complex subunit mu, putative	NA
4237	PF3D7_1305400	Pf3D7_13_v3	268785	-	1953	-0.362	-0.911	0.187	5.518	-1.341	0.189	0.189	-5.162	AAR2 protein, putative	NA
5492	PF3D7_1456100	Pf3D7_14_v3	2301456	-	1389	0.833	-0.434	2.1	-3.625	1.337	0.19	0.19	-4.631	serine hydroxymethyltransferase, putative	SHMT
2240	PF3D7_0827600	Pf3D7_08_v3	1187623	-	5303	0.532	-0.277	1.342	2.193	1.337	0.19	0.19	-4.947	conserved Plasmodium protein, unknown function	NA
149	PF3D7_0110500	Pf3D7_01_v3	396591	+	7016	-0.335	-0.844	0.174	5.625	-1.339	0.19	0.19	-5.196	bromodomain protein, putative	NA
5321	PF3D7_1439100	Pf3D7_14_v3	1580750	+	8108	-0.41	-1.033	0.214	5.914	-1.337	0.19	0.19	-5.206	DEAD/DEAH box helicase, putative	NA
2801	PF3D7_1011000	Pf3D7_10_v3	429204	-	937	0.584	-0.306	1.475	-0.674	1.334	0.191	0.191	-4.735	inner membrane complex sub-compartment protein 1	ISP1
4640	PF3D7_1345200	Pf3D7_13_v3	1812220	-	1710	0.367	-0.192	0.925	4.785	1.334	0.191	0.191	-5.142	rhomboid protease ROM6, putative	ROM6
5401	PF3D7_1447100	Pf3D7_14_v3	1932421	-	780	0.231	-0.121	0.583	6.933	1.335	0.191	0.191	-5.329	conserved Plasmodium protein, unknown function	NA
1402	PF3D7_0610800	Pf3D7_06_v3	453671	+	2019	0.164	-0.086	0.415	10.055	1.333	0.191	0.191	-5.547	transketolase	TK
1013	PF3D7_0505500	Pf3D7_05_v3	239456	-	4425	-0.339	-0.854	0.177	3.485	-1.335	0.191	0.191	-5.046	DNA mismatch repair protein MSH6, putative	MSH6
2693	PF3D7_1000400	Pf3D7_10_v3	44816	-	1318	0.749	-0.396	1.894	2.29	1.331	0.192	0.192	-4.922	rifin	RIF
334	PF3D7_0212900	Pf3D7_02_v3	533253	+	1098	0.719	-0.379	1.817	-1.912	1.332	0.192	0.192	-4.714	leucyl/phenylalanyl-tRNA--protein transferase, putative	NA
4863	PF3D7_1367500	Pf3D7_13_v3	2692076	+	1207	0.323	-0.17	0.817	4.784	1.333	0.192	0.192	-5.209	NADH-cytochrome b5 reductase, putative	NA
2336	PF3D7_0903400	Pf3D7_09_v3	151700	-	7842	0.204	-0.107	0.515	10.753	1.333	0.192	0.192	-5.593	ATP-dependent RNA helicase DDX60, putative	DDX60
1635	PF3D7_0700600	Pf3D7_07_v3	43192	-	949	-0.586	-1.48	0.308	-4.583	-1.333	0.192	0.192	-4.61	Plasmodium exported protein, unknown function, pseudogene	NA
1691	PF3D7_0706200	Pf3D7_07_v3	304315	+	441	0.852	-0.452	2.156	-2.02	1.328	0.193	0.193	-4.681	conserved Plasmodium protein, unknown function	NA
3056	PF3D7_1035700	Pf3D7_10_v3	1413200	+	2094	0.631	-0.336	1.599	0.677	1.327	0.193	0.193	-4.82	duffy binding-like merozoite surface protein	DBLMSP
2220	PF3D7_0825600	Pf3D7_08_v3	1100816	-	258	0.614	-0.325	1.553	2.035	1.329	0.193	0.193	-4.91	cytochrome c oxidase assembly protein, putative	NA
2950	PF3D7_1025300	Pf3D7_10_v3	1057890	-	2769	0.554	-0.295	1.403	0.538	1.328	0.193	0.193	-4.786	conserved Plasmodium protein, unknown function	NA
2959	PF3D7_1026200	Pf3D7_10_v3	1103464	-	1767	0.513	-0.272	1.297	1.929	1.329	0.193	0.193	-4.909	conserved Plasmodium protein, unknown function	NA
1374	PF3D7_0608100	Pf3D7_06_v3	337792	+	3969	0.396	-0.21	1.002	5.486	1.33	0.193	0.193	-5.221	conserved Plasmodium protein, unknown function	NA
3898	PF3D7_1227100	Pf3D7_12_v3	1093543	-	2229	0.313	-0.166	0.792	5.641	1.328	0.193	0.193	-5.232	DNA helicase 60	DH60
2014	PF3D7_0805100	Pf3D7_08_v3	286959	+	1662	-0.496	-1.255	0.263	0.582	-1.33	0.193	0.193	-4.834	conserved Plasmodium protein, unknown function	NA
2438	PF3D7_0913100	Pf3D7_09_v3	571031	-	2319	-0.634	-1.604	0.337	1.248	-1.328	0.193	0.193	-4.839	conserved Plasmodium protein, unknown function	NA
5649	PF3D7_1471700	Pf3D7_14_v3	2929823	+	1725	0.795	-0.424	2.015	-2.966	1.326	0.194	0.194	-4.663	conserved Plasmodium protein, unknown function	NA
2168	PF3D7_0820400	Pf3D7_08_v3	922208	+	1725	0.492	-0.263	1.248	2.597	1.325	0.194	0.194	-4.993	conserved Plasmodium protein, unknown function	NA
161	PF3D7_0111800	Pf3D7_01_v3	446026	+	2824	0.395	-0.211	1.002	3.878	1.326	0.194	0.194	-5.1	eukaryotic translation initiation factor 4E, putative	NA
5021	PF3D7_1409900	Pf3D7_14_v3	389592	+	2004	-0.236	-0.599	0.127	6.279	-1.324	0.194	0.194	-5.28	cytidine diphosphate-diacylglycerol synthase	CDS
1713	PF3D7_0708300	Pf3D7_07_v3	378031	+	1275	-0.25	-0.634	0.133	6.153	-1.326	0.194	0.194	-5.274	EKC/KEOPS complex subunit BUD32	BUD32
2704	PF3D7_1001400	Pf3D7_10_v3	74661	-	2912	-0.342	-0.866	0.182	8.617	-1.326	0.194	0.194	-5.446	alpha/beta hydrolase, putative	NA
2672	PF3D7_0936100	Pf3D7_09_v3	1430607	-	540	-0.412	-1.046	0.221	6.233	-1.325	0.194	0.194	-5.266	early transcribed membrane protein	ETRAMP9
4154	PF3D7_1252500	Pf3D7_12_v3	2145266	-	1351	-0.784	-1.987	0.42	3.297	-1.327	0.194	0.194	-4.999	Plasmodium exported protein, unknown function	NA
4441	PF3D7_1325500	Pf3D7_13_v3	1063944	+	2468	0.742	-0.4	1.885	-2.308	1.321	0.195	0.195	-4.686	conserved Plasmodium protein, unknown function	NA
5585	PF3D7_1465300	Pf3D7_14_v3	2643004	+	3189	-0.258	-0.655	0.139	7.416	-1.323	0.195	0.195	-5.379	tRNA 3'-trailer sequence RNase, putative	NA
3145	PF3D7_1103600	Pf3D7_11_v3	156614	+	1500	-0.278	-0.707	0.15	5.485	-1.321	0.195	0.195	-5.2	actin-like protein, putative	ALP2a
5155	PF3D7_1422800	Pf3D7_14_v3	918429	-	1569	-0.44	-1.117	0.237	5.145	-1.322	0.195	0.195	-5.162	actin-related protein, putative	ARP4a
560	PF3D7_0311700	Pf3D7_03_v3	502698	+	3151	0.584	-0.316	1.484	0.716	1.32	0.196	0.196	-4.844	plasmepsin VI	NA
4266	PF3D7_1308300	Pf3D7_13_v3	372260	+	387	0.278	-0.15	0.706	8.632	1.32	0.196	0.196	-5.468	40S ribosomal protein S27	RPS27
5024	PF3D7_1410200	Pf3D7_14_v3	400418	+	2577	-0.191	-0.485	0.103	9.481	-1.319	0.196	0.196	-5.521	cytidine triphosphate synthetase	NA
4880	PF3D7_1369200	Pf3D7_13_v3	2749595	+	6513	-0.327	-0.831	0.177	6.671	-1.319	0.196	0.196	-5.315	conserved Plasmodium protein, unknown function	NA
5409	PF3D7_1447900	Pf3D7_14_v3	1954601	-	3075	-0.376	-0.954	0.203	4.516	-1.32	0.196	0.196	-5.108	multidrug resistance protein 2	MDR2
2698	PF3D7_1000900	Pf3D7_10_v3	60024	+	1342	0.92	-0.502	2.341	-1.522	1.316	0.197	0.197	-4.756	erythrocyte membrane protein 1 (PfEMP1), pseudogene	NA
1052	PF3D7_0509400	Pf3D7_05_v3	389914	-	9084	0.245	-0.134	0.624	9.454	1.315	0.197	0.197	-5.531	RNA polymerase I	RNAPI
2108	PF3D7_0814300	Pf3D7_08_v3	690541	-	3603	-0.256	-0.652	0.14	7.733	-1.315	0.197	0.197	-5.416	ATPase, putative	NA
190	PF3D7_0114800	Pf3D7_01_v3	569485	-	788	-0.812	-2.066	0.442	-1.349	-1.317	0.197	0.197	-4.693	Plasmodium exported protein (hyp7), unknown function	NA
3060	PF3D7_1036300	Pf3D7_10_v3	1432498	+	2289	0.854	-0.469	2.177	-0.724	1.313	0.198	0.198	-4.772	duffy binding-like merozoite surface protein 2	DBLMSP2
2639	PF3D7_0932800	Pf3D7_09_v3	1303390	-	4400	-0.222	-0.567	0.122	7.776	-1.314	0.198	0.198	-5.417	importin alpha re-exporter, putative	CSE1
5223	PF3D7_1429400	Pf3D7_14_v3	1155355	+	8340	-0.341	-0.868	0.186	6.213	-1.315	0.198	0.198	-5.286	rRNA (adenosine-2'-O-)-methyltransferase, putative	NA
3021	PF3D7_1032200	Pf3D7_10_v3	1298327	-	815	-0.376	-0.958	0.206	1.603	-1.312	0.198	0.198	-4.92	conserved Plasmodium protein, unknown function	NA
1698	PF3D7_0706900	Pf3D7_07_v3	326726	-	72	0.994	-0.549	2.538	-2.931	1.311	0.199	0.199	-4.665	tRNA Histidine	NA
4422	PF3D7_1323600	Pf3D7_13_v3	978965	+	1257	0.596	-0.329	1.521	0.308	1.311	0.199	0.199	-4.833	conserved Plasmodium protein, unknown function	NA
2564	PF3D7_0925500	Pf3D7_09_v3	1025493	+	861	0.536	-0.296	1.368	-0.081	1.309	0.199	0.199	-4.81	thioredoxin-like protein 2	TLP2
1413	PF3D7_0611900	Pf3D7_06_v3	506380	+	819	0.4	-0.221	1.021	3.166	1.31	0.199	0.199	-5.038	lsm12, putative	NA
3582	PF3D7_1146200	Pf3D7_11_v3	1826203	-	590	0.374	-0.207	0.955	2.24	1.309	0.199	0.199	-4.917	conserved Plasmodium protein, unknown function	NA
4696	PF3D7_1350800	Pf3D7_13_v3	2025366	-	741	-0.794	-2.026	0.438	-1.483	-1.31	0.199	0.199	-4.735	conserved Plasmodium protein, unknown function	NA
1970	PF3D7_0800750	Pf3D7_08_v3	76520	+	583	0.852	-0.475	2.18	-0.928	1.306	0.2	0.2	-4.756	Plasmodium exported protein, unknown function, pseudogene	NA
1046	PF3D7_0508800	Pf3D7_05_v3	363588	-	855	0.588	-0.326	1.502	1.251	1.308	0.2	0.2	-4.892	single-stranded DNA-binding protein	SSB
3386	PF3D7_1127300	Pf3D7_11_v3	1063670	-	882	0.306	-0.17	0.782	5.852	1.306	0.2	0.2	-5.274	tRNA (guanine-N(7)-)-methyltransferase, putative	NA
667	PF3D7_0322100	Pf3D7_03_v3	930640	-	1776	0.228	-0.126	0.582	7.657	1.309	0.2	0.2	-5.42	mRNA-capping enzyme subunit beta	Prt1
1384	PF3D7_0609000	Pf3D7_06_v3	370261	+	18234	-0.277	-0.707	0.154	7.673	-1.307	0.2	0.2	-5.403	conserved Plasmodium protein, unknown function	NA
3102	PF3D7_1040500	Pf3D7_10_v3	1615804	+	1267	0.707	-0.395	1.809	1.432	1.305	0.201	0.201	-4.888	rifin	RIF
3738	PF3D7_1211200	Pf3D7_12_v3	491893	-	5496	-0.365	-0.934	0.204	6.887	-1.305	0.201	0.201	-5.359	conserved Plasmodium protein, unknown function	NA
4522	PF3D7_1333400	Pf3D7_13_v3	1370083	+	717	-0.378	-0.967	0.211	7.544	-1.305	0.201	0.201	-5.405	conserved protein, unknown function	NA
2738	PF3D7_1004700	Pf3D7_10_v3	220018	-	1336	0.642	-0.361	1.644	0.504	1.302	0.202	0.202	-4.843	conserved Plasmodium protein, unknown function	NA
2359	PF3D7_0905600	Pf3D7_09_v3	280207	+	3896	0.631	-0.355	1.617	-0.229	1.301	0.202	0.202	-4.782	WD repeat-containing protein 66, putative	WDR66
5775	PF3D7_API04300	Pf3D7_API_v3	17247	-	1728	-0.642	-1.646	0.362	-4.777	-1.301	0.202	0.202	-4.638	RNA polymerase beta subunit, putative	RPOC
1282	PF3D7_0532000	Pf3D7_05_v3	1292410	+	3790	-0.926	-2.38	0.528	10.675	-1.307	0.202	0.202	-5.611	28S ribosomal RNA	NA
966	PF3D7_0500800	Pf3D7_05_v3	43327	-	4435	0.789	-0.451	2.029	7.728	1.304	0.203	0.203	-5.475	mature parasite-infected erythrocyte surface antigen	MESA
2499	PF3D7_0919200	Pf3D7_09_v3	789514	-	965	0.768	-0.435	1.971	-1.457	1.298	0.203	0.203	-4.747	PPPDE peptidase, putative	NA
5309	PF3D7_1437900	Pf3D7_14_v3	1533329	+	1619	0.203	-0.115	0.521	10.155	1.298	0.203	0.203	-5.595	HSP40, subfamily A, putative	ERdj3
2324	PF3D7_0902200	Pf3D7_09_v3	98175	-	2165	-0.263	-0.674	0.149	6.825	-1.299	0.203	0.203	-5.356	serine/threonine protein kinase, FIKK family	FIKK9.3
1895	PF3D7_0726600	Pf3D7_07_v3	1140479	+	2276	-0.447	-1.147	0.253	1.685	-1.298	0.203	0.203	-4.924	conserved Plasmodium protein, unknown function	NA
4312	PF3D7_1312700	Pf3D7_13_v3	532270	-	1689	0.488	-0.279	1.255	2.38	1.295	0.204	0.204	-5.009	probable protein, unknown function	NA
2143	PF3D7_0817900	Pf3D7_08_v3	816803	-	300	0.368	-0.21	0.947	5.56	1.296	0.204	0.204	-5.235	high mobility group protein B2	HMGB2
3330	PF3D7_1121700	Pf3D7_11_v3	820073	+	2448	-0.278	-0.714	0.159	7.075	-1.294	0.204	0.204	-5.381	protein GCN20	GCN20
4634	PF3D7_1344600	Pf3D7_13_v3	1789425	+	1248	-0.506	-1.299	0.288	0.237	-1.296	0.204	0.204	-4.799	lipoyl synthase	LipA
5491	PF3D7_1456000	Pf3D7_14_v3	2296491	+	4378	-0.827	-2.125	0.471	-1.396	-1.296	0.204	0.204	-4.767	transcription factor with AP2 domain(s)	ApiAP2
704	PF3D7_0400900	Pf3D7_04_v3	69961	-	1153	-1.005	-2.586	0.576	0.221	-1.295	0.204	0.204	-4.813	rifin	RIF
5107	PF3D7_1418200	Pf3D7_14_v3	775460	+	852	0.618	-0.355	1.591	1.45	1.292	0.205	0.205	-4.909	conserved Plasmodium protein, unknown function	NA
2102	PF3D7_0813700	Pf3D7_08_v3	671157	-	4260	0.331	-0.189	0.851	4.593	1.294	0.205	0.205	-5.226	ABC transporter F family member 1, putative	ABCF1
1049	PF3D7_0509100	Pf3D7_05_v3	381077	+	5127	-0.361	-0.929	0.207	2.703	-1.294	0.205	0.205	-5.028	structural maintenance of chromosomes protein 4, putative	SMC4
5761	PF3D7_API02900	Pf3D7_API_v3	8417	+	1233	-0.761	-1.957	0.435	-4.528	-1.294	0.205	0.205	-4.647	elongation factor Tu	TUFA
1548	PF3D7_0624900	Pf3D7_06_v3	1015868	+	2577	0.865	-0.499	2.229	-0.911	1.289	0.206	0.206	-4.803	GAS8-like protein, putative	NA
469	PF3D7_0302700	Pf3D7_03_v3	146372	-	685	0.594	-0.343	1.53	-0.031	1.289	0.206	0.206	-4.825	CDGSH iron-sulfur domain-containing protein, putative	NA
3219	PF3D7_1110900	Pf3D7_11_v3	431906	-	1740	0.293	-0.17	0.756	6.984	1.288	0.206	0.206	-5.395	ES2 protein, putative	NA
5574	PF3D7_1464200	Pf3D7_14_v3	2598842	-	1113	-0.251	-0.646	0.145	5.334	-1.289	0.206	0.206	-5.231	zinc finger protein, putative	NA
4990	PF3D7_1406900	Pf3D7_14_v3	251059	+	1768	0.682	-0.396	1.76	-0.609	1.287	0.207	0.207	-4.795	radical SAM protein, putative	NA
1946	PF3D7_0731500	Pf3D7_07_v3	1358055	+	4875	0.468	-0.271	1.207	4.351	1.288	0.207	0.207	-5.199	erythrocyte binding antigen-175	EBA175
4302	PF3D7_1311800	Pf3D7_13_v3	501790	+	3258	0.281	-0.163	0.726	11.226	1.287	0.207	0.207	-5.665	M1-family alanyl aminopeptidase	M1AAP
4254	PF3D7_1307100	Pf3D7_13_v3	327893	+	3036	-0.215	-0.555	0.125	7.838	-1.287	0.207	0.207	-5.457	U3 small nucleolar RNA-associated protein 6, putative	UTP6
5150	PF3D7_1422300	Pf3D7_14_v3	897980	-	1065	-0.327	-0.844	0.19	3.666	-1.287	0.207	0.207	-5.04	DnaJ protein, putative	NA
145	PF3D7_0110100	Pf3D7_01_v3	389261	-	2805	-0.473	-1.219	0.274	5.467	-1.288	0.207	0.207	-5.226	selenocysteine-specific elongation factor selB homologue, putative	NA
1278	PF3D7_0531600	Pf3D7_05_v3	1289601	+	2092	-0.836	-2.161	0.49	10.328	-1.293	0.207	0.207	-5.611	18S ribosomal RNA	NA
3431	PF3D7_1131600	Pf3D7_11_v3	1216521	+	8292	0.843	-0.494	2.18	-0.538	1.283	0.208	0.208	-4.79	conserved Plasmodium protein, unknown function	NA
55	PF3D7_0101300	Pf3D7_01_v3	74563	+	804	0.816	-0.477	2.108	-0.929	1.284	0.208	0.208	-4.787	Pfmc-2TM Maurer's cleft two transmembrane protein	MC-2TM
2871	PF3D7_1017500	Pf3D7_10_v3	701746	+	677	0.603	-0.352	1.558	2.763	1.285	0.208	0.208	-5.005	conserved Plasmodium protein, unknown function	NA
3816	PF3D7_1218800	Pf3D7_12_v3	738357	-	1899	0.51	-0.298	1.318	1.415	1.284	0.208	0.208	-4.909	secreted ookinete protein, putative	PSOP17
932	PF3D7_0423500	Pf3D7_04_v3	1058997	+	1555	0.506	-0.296	1.307	1.862	1.284	0.208	0.208	-4.999	glideosome associated protein with multiple membrane spans 2	GAPM2
1269	PF3D7_0530750	Pf3D7_05_v3	1254282	-	515	0.368	-0.215	0.951	2.571	1.284	0.208	0.208	-4.962	dolichol-phosphate mannosyltransferase subunit 3, putative	DPM3
2798	PF3D7_1010700	Pf3D7_10_v3	422961	+	1405	0.275	-0.161	0.712	6.627	1.283	0.208	0.208	-5.359	dolichyl-phosphate-mannose protein mannosyltransferase, putative	NA
1987	PF3D7_0802400	Pf3D7_08_v3	171865	+	2521	-0.193	-0.499	0.113	7.284	-1.283	0.208	0.208	-5.414	conserved Plasmodium protein, unknown function	NA
4397	PF3D7_1321200	Pf3D7_13_v3	875265	+	583	-0.415	-1.074	0.243	3.72	-1.284	0.208	0.208	-5.052	conserved protein, unknown function	NA
2114	PF3D7_0815000	Pf3D7_08_v3	709333	-	1268	0.78	-0.457	2.017	1.597	1.283	0.209	0.209	-4.94	selenoprotein	Sel3
2132	PF3D7_0816800	Pf3D7_08_v3	767916	-	1877	0.532	-0.312	1.376	-0.483	1.281	0.209	0.209	-4.8	meiotic recombination protein DMC1, putative	DMC1
4068	PF3D7_1244000	Pf3D7_12_v3	1842399	-	3253	0.488	-0.287	1.264	1.291	1.281	0.209	0.209	-4.939	glucose inhibited division protein a homologue, putative	NA
3600	PF3D7_1148000	Pf3D7_11_v3	1909210	-	4290	0.431	-0.254	1.116	2.181	1.28	0.209	0.209	-5.027	serine/threonine protein kinase, putative	NA
3366	PF3D7_1125300	Pf3D7_11_v3	991863	+	4596	0.379	-0.223	0.98	5.476	1.28	0.209	0.209	-5.272	DNA-directed RNA polymerase	mtRNAP
383	PF3D7_0217700	Pf3D7_02_v3	731120	-	1193	0.258	-0.152	0.669	5.981	1.281	0.209	0.209	-5.318	E2F-associated phosphoprotein, putative	NA
2867	PF3D7_1017200	Pf3D7_10_v3	692426	+	1793	-0.491	-1.27	0.288	0.049	-1.281	0.209	0.209	-4.846	enoyl-CoA hydratase-related protein, putative	NA
443	PF3D7_0300100	Pf3D7_03_v3	36965	+	7518	-0.545	-1.409	0.32	4.791	-1.283	0.209	0.209	-5.202	erythrocyte membrane protein 1, PfEMP1	VAR
4149	PF3D7_1252000	Pf3D7_12_v3	2113730	-	72	-0.727	-1.881	0.427	-2.174	-1.281	0.209	0.209	-4.705	tRNA Glutamic acid	NA
3103	PF3D7_1040600	Pf3D7_10_v3	1619086	+	1159	-0.82	-2.122	0.483	-3.48	-1.28	0.209	0.209	-4.675	rifin	RIF
5543	PF3D7_1461100	Pf3D7_14_v3	2485864	+	2757	0.548	-0.323	1.42	0.399	1.28	0.21	0.21	-4.861	conserved Plasmodium protein, unknown function	NA
5183	PF3D7_1425600	Pf3D7_14_v3	995161	-	5346	-0.566	-1.466	0.334	1.133	-1.278	0.21	0.21	-4.888	zinc finger protein, putative	NA
3625	PF3D7_1150400	Pf3D7_11_v3	2025817	+	10070	0.996	-0.596	2.588	3.734	1.28	0.211	0.211	-5.159	erythrocyte membrane protein 1, PfEMP1	VAR
5075	PF3D7_1415000	Pf3D7_14_v3	606380	-	969	0.807	-0.48	2.095	-1.361	1.275	0.211	0.211	-4.751	uracil-DNA glycosylase	UDG
4371	PF3D7_1318600	Pf3D7_13_v3	768049	+	1602	0.789	-0.47	2.048	-3.078	1.275	0.211	0.211	-4.712	conserved Plasmodium protein, unknown function	NA
2090	PF3D7_0812500	Pf3D7_08_v3	626069	-	2877	0.245	-0.146	0.636	9.824	1.275	0.211	0.211	-5.606	RNA-binding protein, putative	NA
4630	PF3D7_1344200	Pf3D7_13_v3	1769129	+	2799	0.196	-0.116	0.509	9.573	1.276	0.211	0.211	-5.582	heat shock protein 110, putative	HSP110
5031	PF3D7_1410900	Pf3D7_14_v3	437224	+	2243	-0.192	-0.497	0.114	8.116	-1.276	0.211	0.211	-5.493	ribosome maturation protein SBDS, putative	NA
4311	PF3D7_1312600	Pf3D7_13_v3	529976	+	1290	-0.802	-2.083	0.478	-1.255	-1.274	0.211	0.211	-4.797	2-oxoisovalerate dehydrogenase subunit alpha, mitochondrial, putative	BCKDHA
655	PF3D7_0320900	Pf3D7_03_v3	875213	+	1083	0.259	-0.155	0.673	8.543	1.274	0.212	0.212	-5.518	histone H2A variant, putative	H2A.Z
3453	PF3D7_1133800	Pf3D7_11_v3	1309024	+	2770	-0.206	-0.536	0.124	7.372	-1.271	0.212	0.212	-5.441	RNA (uracil-5-)methyltransferase, putative	NA
3490	PF3D7_1137100	Pf3D7_11_v3	1462168	+	903	-0.272	-0.707	0.163	5.209	-1.273	0.212	0.212	-5.221	mitochondrial ribosomal protein S9 precursor, putative	NA
3567	PF3D7_1144700	Pf3D7_11_v3	1772350	-	1470	-0.342	-0.888	0.205	3.402	-1.272	0.212	0.212	-5.099	apicoplast import protein Tic20, putative	TIC20
3832	PF3D7_1220400	Pf3D7_12_v3	816909	+	1560	-0.416	-1.081	0.249	5.33	-1.271	0.212	0.212	-5.236	debranching enzyme-associated ribonuclease, putative	DRN1
20	malmito_rna_17	Pf_M76611	126	+	40	-0.557	-1.445	0.332	-4.827	-1.274	0.212	0.212	-4.663	unspecified product	RNA17
36	malmito_rna_RNA22	Pf_M76611	5341	-	38	-0.557	-1.445	0.332	-4.827	-1.274	0.212	0.212	-4.663	unspecified product	RNA22
37	malmito_rna_RNA4	Pf_M76611	4625	+	72	-0.557	-1.445	0.332	-4.827	-1.274	0.212	0.212	-4.663	unspecified product	RNA4
5013	PF3D7_1409200	Pf3D7_14_v3	360656	-	884	0.632	-0.38	1.644	-0.867	1.269	0.213	0.213	-4.794	conserved Plasmodium protein, unknown function	NA
5014	PF3D7_1409200	Pf3D7_14_v3	360656	-	884	0.632	-0.38	1.644	-0.867	1.269	0.213	0.213	-4.794	conserved Plasmodium protein, unknown function	NA
5529	PF3D7_1459800	Pf3D7_14_v3	2446983	-	1316	0.329	-0.199	0.857	4.864	1.269	0.213	0.213	-5.204	bax inhibitor 1, putative	NA
574	PF3D7_0313100	Pf3D7_03_v3	539743	+	3068	0.281	-0.169	0.732	5.753	1.269	0.213	0.213	-5.334	ubiquitin-protein ligase, putative	HRD3
3714	PF3D7_1208900	Pf3D7_12_v3	415404	+	4329	-0.318	-0.827	0.192	6.332	-1.269	0.213	0.213	-5.357	protein phosphatase, putative	NA
1408	PF3D7_0611400	Pf3D7_06_v3	471658	-	2493	-0.349	-0.908	0.21	6.033	-1.27	0.213	0.213	-5.313	SWIB/MDM2 domain-containing protein	SWIB
1443	PF3D7_0614700	Pf3D7_06_v3	612471	+	1928	-0.481	-1.252	0.29	-0.731	-1.27	0.213	0.213	-4.836	conserved Plasmodium protein, unknown function	NA
5728	PF3D7_1479700	Pf3D7_14_v3	3276230	+	1272	-0.7	-1.82	0.421	0.254	-1.27	0.213	0.213	-4.825	rifin	RIF
630	PF3D7_0318400	Pf3D7_03_v3	761693	-	3747	0.939	-0.569	2.447	0.177	1.268	0.214	0.214	-4.876	conserved Plasmodium protein, unknown function	NA
2344	PF3D7_0904100	Pf3D7_09_v3	190858	-	4970	0.345	-0.209	0.899	6.306	1.266	0.214	0.214	-5.36	AP-4 complex subunit epsilon, putative	NA
5290	PF3D7_1436000	Pf3D7_14_v3	1458131	+	1740	0.262	-0.159	0.683	8.092	1.267	0.214	0.214	-5.5	glucose-6-phosphate isomerase	GPI
3655	PF3D7_1202900	Pf3D7_12_v3	162429	-	294	0.248	-0.15	0.646	8.73	1.267	0.214	0.214	-5.539	high mobility group protein B1	HMGB1
295	PF3D7_0209100	Pf3D7_02_v3	381130	-	2316	-0.213	-0.555	0.129	7.513	-1.266	0.214	0.214	-5.463	phospholipase A2, putative	NA
2357	PF3D7_0905400	Pf3D7_09_v3	270740	-	4050	1.084	-0.661	2.83	0.036	1.267	0.215	0.215	-4.857	high molecular weight rhoptry protein 3	RhopH3
854	PF3D7_0415700	Pf3D7_04_v3	691131	-	1386	0.708	-0.431	1.846	-2.675	1.265	0.215	0.215	-4.728	conserved Plasmodium protein, unknown function	NA
5396	PF3D7_1446600	Pf3D7_14_v3	1917232	-	779	0.604	-0.368	1.577	-0.382	1.264	0.215	0.215	-4.866	centrin-2	CEN2
5336	PF3D7_1440600	Pf3D7_14_v3	1656434	+	3307	0.49	-0.298	1.278	0.279	1.264	0.215	0.215	-4.869	conserved Plasmodium protein, unknown function	NA
1943	PF3D7_0731200	Pf3D7_07_v3	1342842	-	1155	0.351	-0.213	0.916	6.228	1.265	0.215	0.215	-5.362	Plasmodium exported protein, unknown function	NA
509	PF3D7_0306700	Pf3D7_03_v3	304317	+	683	0.252	-0.154	0.658	4.932	1.264	0.215	0.215	-5.231	membrane magnesium transporter, putative	NA
1358	PF3D7_0606500	Pf3D7_06_v3	265839	-	2561	-0.207	-0.541	0.126	8.784	-1.263	0.215	0.215	-5.547	polypyrimidine tract-binding protein, putative	NA
1719	PF3D7_0708900	Pf3D7_07_v3	399290	-	954	-0.362	-0.945	0.22	6.046	-1.265	0.215	0.215	-5.351	Cg3 protein	NA
1778	PF3D7_0714700	Pf3D7_07_v3	670795	+	72	-0.704	-1.834	0.427	-3.671	-1.265	0.215	0.215	-4.692	tRNA Asparagine	NA
5137	PF3D7_1421100	Pf3D7_14_v3	871000	+	3762	0.732	-0.452	1.916	5.846	1.264	0.216	0.216	-5.353	conserved Plasmodium protein, unknown function	NA
2529	PF3D7_0922100	Pf3D7_09_v3	895415	+	4890	0.217	-0.133	0.568	11.607	1.26	0.216	0.216	-5.733	ubiquitin-like protein, putative	NA
1354	PF3D7_0606100	Pf3D7_06_v3	257604	+	2371	0.2	-0.122	0.523	9.247	1.262	0.216	0.216	-5.589	RNA-binding protein, putative	NA
3281	PF3D7_1116900	Pf3D7_11_v3	644100	-	1438	-0.634	-1.658	0.389	-0.009	-1.261	0.216	0.216	-4.88	conserved Plasmodium protein, unknown function	NA
315	PF3D7_0211000	Pf3D7_02_v3	443824	+	785	0.343	-0.212	0.898	4.331	1.258	0.217	0.217	-5.181	unspecified product	NA
3981	PF3D7_1235300	Pf3D7_12_v3	1470713	+	4989	0.307	-0.189	0.804	11.827	1.259	0.217	0.217	-5.755	CCR4-NOT transcription complex subunit 4, putative	NOT4
1474	PF3D7_0617800	Pf3D7_06_v3	748416	-	399	0.305	-0.188	0.798	7.504	1.259	0.217	0.217	-5.475	histone H2A	H2A
1864	PF3D7_0723400	Pf3D7_07_v3	978920	-	4269	0.255	-0.157	0.667	10.386	1.26	0.217	0.217	-5.662	conserved Plasmodium protein, unknown function	NA
928	PF3D7_0423100	Pf3D7_04_v3	1049270	-	625	-0.284	-0.742	0.175	6.829	-1.258	0.217	0.217	-5.409	AP-4 complex subunit sigma, putative	NA
396	PF3D7_0219000	Pf3D7_02_v3	767977	-	82	-0.568	-1.484	0.349	-0.908	-1.26	0.217	0.217	-4.783	small nucleolar RNA snoR01	NA
4412	PF3D7_1322600	Pf3D7_13_v3	955957	-	1539	-0.611	-1.598	0.377	-2.056	-1.258	0.217	0.217	-4.768	conserved Plasmodium protein, unknown function	NA
2037	PF3D7_0807400	Pf3D7_08_v3	384298	+	1500	0.583	-0.36	1.526	1.037	1.256	0.218	0.218	-4.918	coenzyme Q-binding protein COQ10 homolog, mitochondrial	COQ10
5103	PF3D7_1417800	Pf3D7_14_v3	753389	+	3052	0.444	-0.275	1.162	2.069	1.256	0.218	0.218	-5.042	DNA replication licensing factor MCM2	MCM2
3315	PF3D7_1120200	Pf3D7_11_v3	765033	+	593	-0.284	-0.743	0.176	4.62	-1.256	0.218	0.218	-5.173	conserved Plasmodium protein, unknown function	NA
2995	PF3D7_1029700	Pf3D7_10_v3	1208198	-	2717	-0.42	-1.101	0.26	2.026	-1.256	0.218	0.218	-5.022	conserved Plasmodium protein, unknown function	NA
3821	PF3D7_1219300	Pf3D7_12_v3	766654	-	7544	-0.616	-1.614	0.382	4.749	-1.258	0.218	0.218	-5.25	erythrocyte membrane protein 1, PfEMP1	VAR
4069	PF3D7_1244100	Pf3D7_12_v3	1847677	+	4480	0.271	-0.169	0.711	6.648	1.253	0.219	0.219	-5.425	N-alpha-acetyltransferase 15, NatA auxiliary subunit, putative	NA
391	PF3D7_0218500	Pf3D7_02_v3	752966	+	474	-0.253	-0.664	0.158	5.619	-1.252	0.219	0.219	-5.285	small nuclear ribonucleoprotein Sm D2, putative	SNRPD2
1214	PF3D7_0525500	Pf3D7_05_v3	1059918	-	5592	-0.28	-0.734	0.174	6.573	-1.253	0.219	0.219	-5.38	WD repeat-containing protein, putative	NA
3019	PF3D7_1032000	Pf3D7_10_v3	1287715	-	2331	-0.547	-1.435	0.34	3.852	-1.254	0.219	0.219	-5.144	ribosome maturation factor RimM, putative	RimM
694	PF3D7_0324800	Pf3D7_03_v3	1027571	+	1359	-0.72	-1.89	0.449	1.672	-1.253	0.219	0.219	-4.947	rifin	RIF
3576	PF3D7_1145600	Pf3D7_11_v3	1810290	-	2153	0.548	-0.344	1.44	0.032	1.25	0.22	0.22	-4.841	conserved protein, unknown function	NA
4622	PF3D7_1343400	Pf3D7_13_v3	1714443	+	4813	-0.309	-0.811	0.194	6.896	-1.249	0.22	0.22	-5.441	DNA repair protein RAD5, putative	RAD5
5590	PF3D7_1465800	Pf3D7_14_v3	2662020	+	20686	0.414	-0.261	1.088	3.362	1.248	0.221	0.221	-5.161	dynein beta chain, putative	NA
2998	PF3D7_1030000	Pf3D7_10_v3	1223375	+	793	0.235	-0.149	0.619	7.415	1.246	0.221	0.221	-5.487	transcription elongation factor SPT4, putative	SPT4
778	PF3D7_0408300	Pf3D7_04_v3	403626	-	1741	-0.358	-0.94	0.225	5.775	-1.248	0.221	0.221	-5.329	zinc finger Ran-binding domain-containing protein 2, putative	ZRANB2
5473	PF3D7_1454300	Pf3D7_14_v3	2229284	+	2298	-0.455	-1.198	0.287	4.403	-1.247	0.221	0.221	-5.207	serine/threonine protein kinase KIN	KIN
4452	PF3D7_1326600	Pf3D7_13_v3	1107875	+	14666	0.816	-0.518	2.15	-1.08	1.244	0.222	0.222	-4.827	conserved Plasmodium protein, unknown function	NA
784	PF3D7_0408900	Pf3D7_04_v3	424300	+	2895	0.658	-0.417	1.733	-0.746	1.245	0.222	0.222	-4.832	tRNA N6-adenosine threonylcarbamoyltransferase	KAE1
785	PF3D7_0408900	Pf3D7_04_v3	424300	+	2895	0.658	-0.417	1.733	-0.746	1.245	0.222	0.222	-4.832	tRNA N6-adenosine threonylcarbamoyltransferase	KAE1
1235	PF3D7_0527500	Pf3D7_05_v3	1143618	+	1742	0.231	-0.147	0.609	10.618	1.245	0.222	0.222	-5.692	Hsc70-interacting protein	HIP
5470	PF3D7_1454000	Pf3D7_14_v3	2219080	+	1536	-0.29	-0.765	0.184	6.271	-1.245	0.222	0.222	-5.379	RNA-binding protein, putative	NA
5660	PF3D7_1472800	Pf3D7_14_v3	2969912	-	1881	-0.467	-1.231	0.296	1.859	-1.244	0.222	0.222	-4.943	conserved Plasmodium protein, unknown function	NA
2655	PF3D7_0934400	Pf3D7_09_v3	1349790	+	603	0.477	-0.304	1.259	2.646	1.242	0.223	0.223	-5.104	transcription factor with AP2 domain(s), putative	ApiAP2
4875	PF3D7_1368700	Pf3D7_13_v3	2727425	-	1731	0.386	-0.246	1.018	3.179	1.241	0.223	0.223	-5.13	mitochondrial carrier protein, putative	NA
1732	PF3D7_0710100	Pf3D7_07_v3	460057	+	1380	0.342	-0.218	0.903	6	1.242	0.223	0.223	-5.387	conserved Plasmodium protein, unknown function	NA
1962	PF3D7_0800100	Pf3D7_08_v3	21361	+	7293	-0.447	-1.18	0.286	5.375	-1.241	0.223	0.223	-5.303	erythrocyte membrane protein 1, PfEMP1	VAR
998	PF3D7_0504000	Pf3D7_05_v3	157625	+	7344	0.384	-0.247	1.015	4.045	1.239	0.224	0.224	-5.168	cation transporting P-ATPase	ATPase3
5403	PF3D7_1447300	Pf3D7_14_v3	1936888	+	487	0.362	-0.232	0.955	3.147	1.239	0.224	0.224	-5.121	mitochondrial ribosomal protein S14 precursor, putative	NA
5682	PF3D7_1475100	Pf3D7_14_v3	3076442	+	4581	-0.343	-0.905	0.219	5.676	-1.24	0.224	0.224	-5.31	conserved Plasmodium protein, unknown function	NA
1811	PF3D7_0718000	Pf3D7_07_v3	776141	-	19497	0.522	-0.337	1.382	2.076	1.237	0.225	0.225	-5.011	dynein heavy chain, putative	NA
3806	PF3D7_1217800	Pf3D7_12_v3	698771	-	243	-0.31	-0.821	0.201	3.553	-1.235	0.225	0.225	-5.098	diphthamide biosynthesis protein 3, putative	DPH3
2559	PF3D7_0925000	Pf3D7_09_v3	1012118	+	1746	0.672	-0.436	1.78	-1.046	1.234	0.226	0.226	-4.854	conserved Plasmodium protein, unknown function	NA
2010	PF3D7_0804700	Pf3D7_08_v3	271417	-	5997	0.392	-0.254	1.038	7.303	1.234	0.226	0.226	-5.517	conserved Plasmodium protein, unknown function	NA
3730	PF3D7_1210400	Pf3D7_12_v3	466602	-	2706	0.309	-0.201	0.82	7.148	1.232	0.226	0.226	-5.491	general transcription factor 3C polypeptide 5, putative	NA
226	PF3D7_0202500	Pf3D7_02_v3	127994	+	321	0.304	-0.197	0.806	11.64	1.234	0.226	0.226	-5.755	early transcribed membrane protein 2	ETRAMP2
5275	PF3D7_1434600	Pf3D7_14_v3	1404312	+	1887	-0.257	-0.68	0.166	8.411	-1.235	0.226	0.226	-5.56	methionine aminopeptidase 2	METAP2
1033	PF3D7_0507500	Pf3D7_05_v3	307490	-	2067	-0.527	-1.396	0.342	4.188	-1.233	0.226	0.226	-5.205	subtilisin-like protease 1	SUB1
3093	PF3D7_1039600	Pf3D7_10_v3	1590146	+	828	-0.858	-2.273	0.556	-2.055	-1.234	0.226	0.226	-4.757	exported protein family 1, pseudogene	EPF1
2681	PF3D7_0937000	Pf3D7_09_v3	1465904	+	1152	0.74	-0.482	1.962	0.355	1.232	0.227	0.227	-4.938	Plasmodium exported protein (PHISTb), unknown function	NA
1976	PF3D7_0801300	Pf3D7_08_v3	101954	-	873	0.52	-0.339	1.379	1.462	1.231	0.227	0.227	-5	von Willebrand factor A domain-related protein	WARP
4958	PF3D7_1403900	Pf3D7_14_v3	142242	-	897	0.518	-0.338	1.373	3.07	1.23	0.227	0.227	-5.094	serine/threonine protein phosphatase CPPED1, putative	CPPED1
3353	PF3D7_1124000	Pf3D7_11_v3	948591	+	2117	0.244	-0.16	0.648	6.006	1.23	0.227	0.227	-5.38	endoplasmic reticulum oxidoreductin, putative	ERO1
5164	PF3D7_1423700	Pf3D7_14_v3	959074	-	4677	0.184	-0.12	0.487	10.474	1.231	0.227	0.227	-5.699	conserved Plasmodium protein, unknown function	NA
382	PF3D7_0217600	Pf3D7_02_v3	723747	-	6186	-0.355	-0.943	0.232	4.719	-1.231	0.227	0.227	-5.224	conserved Plasmodium protein, unknown function	NA
3523	PF3D7_1140300	Pf3D7_11_v3	1605321	+	1086	0.929	-0.608	2.467	-2.33	1.229	0.228	0.228	-4.754	P-loop containing nucleoside triphosphate hydrolase, putative	NA
2131	PF3D7_0816700	Pf3D7_08_v3	767110	+	771	0.52	-0.34	1.379	2.783	1.229	0.228	0.228	-5.066	trafficking protein particle complex subunit 2-like protein, putative	TRAPPC2L
3801	PF3D7_1217300	Pf3D7_12_v3	682837	+	2886	0.302	-0.198	0.802	7.044	1.227	0.228	0.228	-5.519	GTP-binding protein, putative	NA
2548	PF3D7_0923900	Pf3D7_09_v3	966795	-	1275	0.265	-0.174	0.705	7.142	1.228	0.228	0.228	-5.473	RNA-binding protein, putative	NA
513	PF3D7_0307100	Pf3D7_03_v3	312693	-	650	0.21	-0.137	0.557	9.004	1.229	0.228	0.228	-5.6	40S ribosomal protein S12, putative	NA
524	PF3D7_0308200	Pf3D7_03_v3	362342	-	1892	-0.173	-0.459	0.114	8.584	-1.227	0.228	0.228	-5.572	T-complex protein 1 subunit eta	CCT7
2450	PF3D7_0914300	Pf3D7_09_v3	612976	-	2517	-0.217	-0.576	0.143	6.93	-1.227	0.228	0.228	-5.446	met-10+ like protein, putative	NA
2169	PF3D7_0820500	Pf3D7_08_v3	925113	+	2559	-0.232	-0.617	0.153	7.39	-1.227	0.228	0.228	-5.495	C-13 antigen	NA
75	PF3D7_0103300	Pf3D7_01_v3	143640	-	2757	-0.297	-0.788	0.195	7.55	-1.228	0.228	0.228	-5.503	conserved Plasmodium protein, unknown function	NA
907	PF3D7_0421000	Pf3D7_04_v3	956849	+	135	-0.565	-1.5	0.371	-4.804	-1.227	0.228	0.228	-4.705	Plasmodium RNA of unknown function RUF6	NA
5535	PF3D7_1460400	Pf3D7_14_v3	2461321	+	1784	0.379	-0.25	1.009	5.677	1.226	0.229	0.229	-5.336	ubiquitin carboxyl-terminal hydrolase isozyme L3	UCHL3
2670	PF3D7_0935900	Pf3D7_09_v3	1420483	-	2325	0.292	-0.193	0.776	14.004	1.226	0.229	0.229	-5.866	ring-exported protein 1	REX1
4057	PF3D7_1242900	Pf3D7_12_v3	1808878	-	745	-0.409	-1.086	0.269	1.881	-1.227	0.229	0.229	-5.003	mitochondrial import inner membrane translocase subunit TIM13, putative	TIM13
3628	PF3D7_1200300	Pf3D7_12_v3	30078	-	1184	-1.088	-2.895	0.718	0.364	-1.228	0.229	0.229	-4.83	rifin	RIF
3094	PF3D7_1039700	Pf3D7_10_v3	1591578	-	790	0.797	-0.528	2.121	-0.61	1.223	0.23	0.23	-4.861	Pfmc-2TM Maurer's cleft two transmembrane protein	MC-2TM
2071	PF3D7_0810800	Pf3D7_08_v3	548200	+	2417	0.628	-0.418	1.675	6.268	1.226	0.23	0.23	-5.421	hydroxymethyldihydropterin pyrophosphokinase-dihydropteroate synthase	PPPK-DHPS
3139	PF3D7_1103000	Pf3D7_11_v3	138646	+	389	0.431	-0.286	1.148	2.49	1.223	0.23	0.23	-5.075	conserved Plasmodium protein, unknown function	NA
5145	PF3D7_1421800	Pf3D7_14_v3	888838	-	1116	0.392	-0.26	1.044	2.327	1.223	0.23	0.23	-5.06	conserved Plasmodium protein, unknown function	NA
5001	PF3D7_1408000	Pf3D7_14_v3	293471	+	1362	-0.273	-0.727	0.181	7.143	-1.224	0.23	0.23	-5.471	plasmepsin II	NA
5172	PF3D7_1424500	Pf3D7_14_v3	979464	+	142	-0.45	-1.199	0.299	2.609	-1.222	0.23	0.23	-5.035	small nucleolar RNA snoR27	NA
557	PF3D7_0311400	Pf3D7_03_v3	488804	+	7707	-0.475	-1.266	0.316	0.754	-1.222	0.23	0.23	-4.954	protein kinase, putative	NA
3603	PF3D7_1148500	Pf3D7_11_v3	1922656	+	273	0.946	-0.632	2.523	0.017	1.221	0.231	0.231	-4.908	unspecified product	NA
1897	PF3D7_0726800	Pf3D7_07_v3	1144046	-	685	0.515	-0.343	1.373	-1.188	1.221	0.231	0.231	-4.82	dolichyl-diphosphooligosaccharide--protein glycosyltransferase subunit DAD1, putative	DAD1
2078	PF3D7_0811400	Pf3D7_08_v3	575986	+	2385	0.277	-0.185	0.739	8.674	1.221	0.231	0.231	-5.589	conserved protein, unknown function	NA
199	PF3D7_0115500	Pf3D7_01_v3	600692	+	1301	1.063	-0.717	2.842	0.654	1.219	0.232	0.232	-4.96	erythrocyte membrane protein 1 (PfEMP1), pseudogene	NA
676	PF3D7_0323000	Pf3D7_03_v3	968675	-	528	0.413	-0.277	1.104	4.104	1.217	0.232	0.232	-5.192	translation machinery-associated protein 7, putative	TMA7
1720	PF3D7_0709000	Pf3D7_07_v3	403222	+	3096	0.279	-0.187	0.744	8.728	1.219	0.232	0.232	-5.604	chloroquine resistance transporter	CRT
1440	PF3D7_0614400	Pf3D7_06_v3	604573	+	768	-0.242	-0.645	0.162	6.458	-1.217	0.232	0.232	-5.415	pre-mRNA-splicing factor CWF7, putative	CWF7
592	PF3D7_0314700	Pf3D7_03_v3	589002	-	3546	-0.704	-1.879	0.471	0.999	-1.218	0.232	0.232	-4.979	zinc finger protein, putative	NA
3084	PF3D7_1038500	Pf3D7_10_v3	1548455	-	1277	0.786	-0.531	2.104	-2.349	1.214	0.233	0.233	-4.784	Plasmodium exported protein, unknown function	NA
4489	PF3D7_1330200	Pf3D7_13_v3	1275104	+	796	0.365	-0.246	0.975	2.88	1.215	0.233	0.233	-5.089	conserved Plasmodium protein, unknown function	NA
3789	PF3D7_1216200	Pf3D7_12_v3	648889	+	1664	0.285	-0.192	0.761	8.445	1.216	0.233	0.233	-5.581	glycerol-3-phosphate dehydrogenase, putative	NA
3434	PF3D7_1131900	Pf3D7_11_v3	1234061	-	2331	-0.644	-1.724	0.435	-0.573	-1.214	0.233	0.233	-4.9	conserved Plasmodium protein, unknown function	NA
3826	PF3D7_1219800	Pf3D7_12_v3	795157	+	162	0.728	-0.492	1.949	-0.943	1.213	0.234	0.234	-4.857	conserved Plasmodium protein, unknown function	NA
410	PF3D7_0220300	Pf3D7_02_v3	813827	-	828	0.722	-0.49	1.933	2.065	1.213	0.234	0.234	-5.072	Plasmodium exported protein, unknown function	NA
184	PF3D7_0114200	Pf3D7_01_v3	550576	-	1138	0.688	-0.467	1.842	-3.255	1.212	0.234	0.234	-4.765	exported protein family 3	EPF3
3370	PF3D7_1125700	Pf3D7_11_v3	1004780	-	2575	0.495	-0.335	1.325	0.409	1.212	0.234	0.234	-4.974	kelch domain-containing protein, putative	NA
2664	PF3D7_0935300	Pf3D7_09_v3	1373018	+	705	0.333	-0.226	0.893	3.552	1.212	0.234	0.234	-5.154	phosphatidylinositol N-acetylglucosaminyltransferase subunit P, putative	NA
4555	PF3D7_1336700	Pf3D7_13_v3	1482361	-	477	-0.251	-0.673	0.171	6.777	-1.211	0.234	0.234	-5.448	conserved Plasmodium protein, unknown function	NA
5060	PF3D7_1413500	Pf3D7_14_v3	536796	-	1044	0.512	-0.349	1.373	-0.708	1.21	0.235	0.235	-4.885	FeS assembly ATPase SufC	SufC
4559	PF3D7_1337100	Pf3D7_13_v3	1495259	+	1982	0.491	-0.335	1.316	1.931	1.208	0.235	0.235	-5.02	protein kinase 6	PK6
3681	PF3D7_1205600	Pf3D7_12_v3	249336	-	2064	0.42	-0.286	1.127	5.835	1.21	0.235	0.235	-5.406	conserved Plasmodium protein, unknown function	NA
3646	PF3D7_1202100	Pf3D7_12_v3	113787	+	2137	0.332	-0.226	0.89	6.574	1.209	0.235	0.235	-5.451	SRAP domain-containing protein, putative	NA
3647	PF3D7_1202100	Pf3D7_12_v3	113787	+	2137	0.332	-0.226	0.89	6.574	1.209	0.235	0.235	-5.451	SRAP domain-containing protein, putative	NA
2811	PF3D7_1011900	Pf3D7_10_v3	460335	-	1659	-0.231	-0.619	0.157	4.763	-1.211	0.235	0.235	-5.297	heme oxygenase	HO
4084	PF3D7_1245600	Pf3D7_12_v3	1900249	-	4818	-0.486	-1.303	0.332	2.086	-1.209	0.235	0.235	-5.044	kinesin, putative	NA
3688	PF3D7_1206300	Pf3D7_12_v3	281020	-	8283	-0.622	-1.669	0.424	3.621	-1.212	0.235	0.235	-5.248	conserved Plasmodium protein, unknown function	NA
1753	PF3D7_0712200	Pf3D7_07_v3	540343	-	1199	-0.834	-2.235	0.567	-3.879	-1.21	0.235	0.235	-4.735	rifin, pseudogene	RIF
4080	PF3D7_1245200	Pf3D7_12_v3	1888250	-	4449	0.775	-0.532	2.082	-0.08	1.206	0.236	0.236	-4.906	conserved Plasmodium membrane protein, unknown function	NA
4211	PF3D7_1303000	Pf3D7_13_v3	158144	+	635	0.433	-0.296	1.162	3.57	1.207	0.236	0.236	-5.18	conserved Plasmodium protein, unknown function	NA
2196	PF3D7_0823200	Pf3D7_08_v3	1022629	-	1218	0.226	-0.155	0.606	9.042	1.207	0.236	0.236	-5.633	RNA-binding protein, putative	NA
3883	PF3D7_1225600	Pf3D7_12_v3	1035261	-	2895	0.196	-0.134	0.526	8.847	1.206	0.236	0.236	-5.622	conserved Plasmodium protein, unknown function	NA
2415	PF3D7_0910800	Pf3D7_09_v3	494163	+	1344	-0.23	-0.618	0.158	5.702	-1.206	0.236	0.236	-5.365	cytosolic Fe-S cluster assembly factor NBP35, putative	NBP35
89	PF3D7_0104700	Pf3D7_01_v3	210870	+	2136	-0.582	-1.565	0.4	-1.058	-1.206	0.236	0.236	-4.889	major facilitator superfamily-related transporter, putative	MFR2
2332	PF3D7_0903000	Pf3D7_09_v3	129224	+	477	0.57	-0.394	1.534	-0.235	1.203	0.237	0.237	-4.887	conserved protein, unknown function	NA
4701	PF3D7_1351300	Pf3D7_13_v3	2048381	-	1276	0.444	-0.306	1.194	2.825	1.204	0.237	0.237	-5.142	conserved Plasmodium membrane protein, unknown function	NA
2669	PF3D7_0935800	Pf3D7_09_v3	1413840	+	5915	0.347	-0.239	0.932	2.861	1.204	0.237	0.237	-5.144	cytoadherence linked asexual protein 9	CLAG9
3873	PF3D7_1224600	Pf3D7_12_v3	1000679	-	1267	0.326	-0.225	0.877	5.64	1.204	0.237	0.237	-5.386	cytochrome c heme lyase, putative	CCHL
407	PF3D7_0220000	Pf3D7_02_v3	796752	+	4835	0.251	-0.172	0.674	10.805	1.205	0.237	0.237	-5.753	liver stage antigen 3	LSA3
1799	PF3D7_0716800	Pf3D7_07_v3	732070	-	1427	-0.178	-0.48	0.123	8.765	-1.204	0.237	0.237	-5.61	eukaryotic translation initiation factor 3 subunit I, putative	EIF3I
326	PF3D7_0212100	Pf3D7_02_v3	483436	+	5535	-0.225	-0.604	0.155	8.056	-1.203	0.237	0.237	-5.564	conserved Plasmodium protein, unknown function	NA
5512	PF3D7_1458100	Pf3D7_14_v3	2390726	+	177	-0.296	-0.796	0.204	2.05	-1.204	0.237	0.237	-4.992	protein PET117, putative	PET117
4272	PF3D7_1308900	Pf3D7_13_v3	408580	-	3522	-0.313	-0.843	0.216	8.049	-1.204	0.237	0.237	-5.564	mRNA-decapping enzyme 2, putative	DCP2
843	PF3D7_0414600	Pf3D7_04_v3	658620	-	919	0.716	-0.495	1.927	-2.354	1.202	0.238	0.238	-4.81	conserved Apicomplexan protein, unknown function	NA
4107	PF3D7_1247800	Pf3D7_12_v3	1968163	+	2912	0.505	-0.351	1.361	0.958	1.2	0.238	0.238	-4.96	dipeptidyl aminopeptidase 2	DPAP2
860	PF3D7_0416300	Pf3D7_04_v3	711092	-	4398	0.496	-0.344	1.335	2.334	1.201	0.238	0.238	-5.059	DNA helicase MCM9, putative	MCM9
4162	PF3D7_1253300	Pf3D7_12_v3	2175329	+	759	0.356	-0.247	0.959	7.759	1.201	0.238	0.238	-5.565	Plasmodium exported protein (PHISTa), unknown function, pseudogene	NA
4391	PF3D7_1320600	Pf3D7_13_v3	847090	+	1294	0.243	-0.168	0.653	7.242	1.202	0.238	0.238	-5.51	ras-related protein Rab-11A	RAB11a
5066	PF3D7_1414100	Pf3D7_14_v3	560093	+	2232	0.236	-0.164	0.637	7.623	1.201	0.238	0.238	-5.558	conserved Plasmodium protein, unknown function	NA
5252	PF3D7_1432300	Pf3D7_14_v3	1269368	-	5300	-0.627	-1.689	0.435	0.376	-1.201	0.238	0.238	-4.894	conserved Plasmodium protein, unknown function	NA
2219	PF3D7_0825500	Pf3D7_08_v3	1098484	+	1893	-0.2	-0.54	0.139	9.25	-1.2	0.239	0.239	-5.654	protein KRI1, putative	KRI1
1961	PF3D7_0733000	Pf3D7_07_v3	1417588	-	8647	-0.506	-1.365	0.353	5.525	-1.199	0.239	0.239	-5.377	erythrocyte membrane protein 1, PfEMP1	VAR
3956	PF3D7_1232800	Pf3D7_12_v3	1350645	-	639	0.605	-0.424	1.635	-0.596	1.196	0.24	0.24	-4.874	conserved Plasmodium protein, unknown function	NA
5082	PF3D7_1415700	Pf3D7_14_v3	634815	-	1719	0.398	-0.278	1.074	3.276	1.197	0.24	0.24	-5.178	serine C-palmitoyltransferase, putative	NA
2651	PF3D7_0934000	Pf3D7_09_v3	1340065	-	1929	0.322	-0.225	0.87	3.379	1.197	0.24	0.24	-5.138	histidine--tRNA ligase, putative	NA
4326	PF3D7_1314100	Pf3D7_13_v3	607794	+	2259	-0.267	-0.721	0.187	5.122	-1.196	0.24	0.24	-5.314	conserved Plasmodium protein, unknown function	NA
3651	PF3D7_1202500	Pf3D7_12_v3	144046	-	3240	-0.364	-0.984	0.255	5.325	-1.197	0.24	0.24	-5.346	trimethylguanosine synthase, putative	TGS1
1611	PF3D7_0631000	Pf3D7_06_v3	1295474	+	858	-0.584	-1.576	0.408	2.063	-1.196	0.24	0.24	-5.036	tetratricopeptide repeat protein, putative	NA
4895	PF3D7_1371000	Pf3D7_13_v3	2800004	+	2151	-0.79	-2.132	0.553	-0.582	-1.196	0.24	0.24	-4.865	18S ribosomal RNA	NA
3132	PF3D7_1102300	Pf3D7_11_v3	110027	-	1403	-0.985	-2.665	0.695	5.239	-1.202	0.24	0.24	-5.385	Plasmodium exported protein, unknown function	NA
3389	PF3D7_1127600	Pf3D7_11_v3	1071752	+	2062	0.55	-0.386	1.485	2.15	1.195	0.241	0.241	-5.085	CRAL/TRIO domain-containing protein, putative	NA
4666	PF3D7_1347800	Pf3D7_13_v3	1911507	+	1326	0.455	-0.321	1.23	0.367	1.193	0.241	0.241	-5.002	leucine-rich repeat protein	LRR4.1
5032	PF3D7_1411000	Pf3D7_14_v3	440541	+	7233	0.378	-0.266	1.023	3.01	1.194	0.241	0.241	-5.156	conserved Plasmodium protein, unknown function	NA
5033	PF3D7_1411000	Pf3D7_14_v3	440541	+	7233	0.378	-0.266	1.023	3.01	1.194	0.241	0.241	-5.156	conserved Plasmodium protein, unknown function	NA
3267	PF3D7_1115600	Pf3D7_11_v3	589707	-	923	0.325	-0.229	0.878	5.869	1.193	0.241	0.241	-5.423	peptidyl-prolyl cis-trans isomerase	CYP19B
2662	PF3D7_0935100	Pf3D7_09_v3	1367396	-	219	0.252	-0.177	0.682	4.944	1.194	0.241	0.241	-5.312	protein kish, putative	KSH1
3744	PF3D7_1211800	Pf3D7_12_v3	526109	+	1672	0.252	-0.177	0.68	9.237	1.193	0.241	0.241	-5.662	polyubiquitin	PfpUB
2414	PF3D7_0910700	Pf3D7_09_v3	491275	+	1632	-0.395	-1.067	0.278	1.354	-1.193	0.241	0.241	-4.983	actin-like protein, putative	ALP5a
828	PF3D7_0413200	Pf3D7_04_v3	603166	-	1291	-1.111	-3.006	0.784	-3.454	-1.193	0.241	0.241	-4.764	rifin	RIF
4796	PF3D7_1360900	Pf3D7_13_v3	2440438	-	2472	0.494	-0.349	1.337	2.873	1.191	0.242	0.242	-5.138	polyadenylate-binding protein, putative	NA
3265	PF3D7_1115400	Pf3D7_11_v3	584328	-	1479	-0.245	-0.664	0.173	7.582	-1.191	0.242	0.242	-5.549	cysteine proteinase falcipain 3	FP3
1910	PF3D7_0728100	Pf3D7_07_v3	1193616	-	16686	0.658	-0.469	1.786	-1.781	1.188	0.243	0.243	-4.83	conserved Plasmodium membrane protein, unknown function	NA
395	PF3D7_0218900	Pf3D7_02_v3	767584	-	160	0.576	-0.409	1.561	-0.276	1.19	0.243	0.243	-4.883	Plasmodium RNA of unknown function RUF2	NA
1075	PF3D7_0511700	Pf3D7_05_v3	519129	+	950	0.355	-0.253	0.963	3.938	1.189	0.243	0.243	-5.226	EKC/KEOPS complex subunit CGI121	CGI121
1045	PF3D7_0508700	Pf3D7_05_v3	358261	+	4473	-0.23	-0.625	0.165	8.828	-1.185	0.244	0.244	-5.645	pre-mRNA-processing ATP-dependent RNA helicase PRP5, putative	PRP5
4268	PF3D7_1308500	Pf3D7_13_v3	393857	-	1080	0.711	-0.51	1.933	-0.888	1.184	0.245	0.245	-4.86	conserved Plasmodium protein, unknown function	NA
1193	PF3D7_0523400	Pf3D7_05_v3	973518	+	2359	-0.301	-0.817	0.216	5.623	-1.185	0.245	0.245	-5.378	DnaJ protein, putative	NA
2855	PF3D7_1016000	Pf3D7_10_v3	641390	+	1362	-0.393	-1.07	0.283	0.527	-1.182	0.245	0.245	-5.001	conserved Plasmodium protein, unknown function	NA
2545	PF3D7_0923700	Pf3D7_09_v3	960181	-	1210	-0.682	-1.855	0.491	0.308	-1.183	0.245	0.245	-4.961	conserved protein, unknown function	NA
3767	PF3D7_1214000	Pf3D7_12_v3	600954	-	611	0.833	-0.601	2.268	-1.451	1.181	0.246	0.246	-4.853	conserved Plasmodium protein, unknown function	NA
1241	PF3D7_0528100	Pf3D7_05_v3	1157840	-	3714	0.259	-0.187	0.706	8.404	1.18	0.246	0.246	-5.631	AP-1 complex subunit beta, putative	NA
532	PF3D7_0309000	Pf3D7_03_v3	384375	+	2505	0.221	-0.159	0.601	6.232	1.182	0.246	0.246	-5.442	dual specificity protein phosphatase	YVH1
3075	PF3D7_1037700	Pf3D7_10_v3	1495973	+	686	-0.349	-0.948	0.251	5.471	-1.182	0.246	0.246	-5.347	enhancer of rudimentary homolog, putative	ERH
2675	PF3D7_0936400	Pf3D7_09_v3	1440783	+	878	-0.399	-1.087	0.288	5.631	-1.181	0.246	0.246	-5.384	ring-exported protein 4	REX4
5175	PF3D7_1424800	Pf3D7_14_v3	981881	+	118	-0.836	-2.273	0.602	-1.796	-1.182	0.246	0.246	-4.813	unspecified product	NA
1619	PF3D7_0631800	Pf3D7_06_v3	1329771	+	1193	0.845	-0.615	2.306	-2.933	1.177	0.247	0.247	-4.795	rifin	RIF
4513	PF3D7_1332500	Pf3D7_13_v3	1340786	+	657	0.271	-0.197	0.738	6.944	1.178	0.247	0.247	-5.508	SAM-dependent RNA methyltransferase, putative	NA
5195	PF3D7_1426800	Pf3D7_14_v3	1043057	+	6534	-0.205	-0.559	0.149	8.048	-1.18	0.247	0.247	-5.589	conserved Plasmodium protein, unknown function	NA
4832	PF3D7_1364400	Pf3D7_13_v3	2585032	+	9798	-0.24	-0.654	0.174	7.201	-1.178	0.247	0.247	-5.526	conserved Plasmodium protein, unknown function	NA
2803	PF3D7_1011200	Pf3D7_10_v3	436958	+	751	-0.346	-0.945	0.252	3.87	-1.177	0.247	0.247	-5.18	conserved Plasmodium protein, unknown function	NA
2804	PF3D7_1011200	Pf3D7_10_v3	436958	+	751	-0.346	-0.945	0.252	3.87	-1.177	0.247	0.247	-5.18	conserved Plasmodium protein, unknown function	NA
5128	PF3D7_1420200	Pf3D7_14_v3	838927	-	3738	-0.358	-0.976	0.26	2.659	-1.179	0.247	0.247	-5.087	tetratricopeptide repeat protein, putative	NA
2857	PF3D7_1016200	Pf3D7_10_v3	646054	+	1683	-0.334	-0.912	0.244	6.063	-1.176	0.248	0.248	-5.418	Rab3 GTPase-activating protein non-catalytic subunit, putative	NA
191	PF3D7_0114900	Pf3D7_01_v3	572135	-	719	-0.83	-2.267	0.607	-1.636	-1.175	0.248	0.248	-4.82	Plasmodium exported protein, unknown function, pseudogene	NA
3532	PF3D7_1141200	Pf3D7_11_v3	1657507	-	472	0.535	-0.391	1.461	-0.864	1.174	0.249	0.249	-4.907	conserved Apicomplexan protein, unknown function	NA
1365	PF3D7_0607200	Pf3D7_06_v3	301874	-	1417	0.452	-0.331	1.235	0.065	1.174	0.249	0.249	-4.979	RING zinc finger protein, putative	NA
1010	PF3D7_0505200	Pf3D7_05_v3	230695	+	1698	0.404	-0.296	1.104	2.421	1.174	0.249	0.249	-5.09	actin-like protein, putative	ALP2b
2001	PF3D7_0803800	Pf3D7_08_v3	233467	-	960	0.214	-0.157	0.585	7.742	1.174	0.249	0.249	-5.583	proteasome subunit beta type-4	NA
4265	PF3D7_1308200	Pf3D7_13_v3	361166	-	7330	0.177	-0.13	0.484	10.652	1.174	0.249	0.249	-5.773	carbamoyl phosphate synthetase	cpsSII
4646	PF3D7_1345800	Pf3D7_13_v3	1831842	+	3150	-0.219	-0.597	0.16	6.798	-1.174	0.249	0.249	-5.5	conserved Plasmodium protein, unknown function	NA
2721	PF3D7_1003000	Pf3D7_10_v3	142419	+	3819	-0.479	-1.308	0.351	0.038	-1.174	0.249	0.249	-4.962	conserved Plasmodium protein, unknown function	NA
5338	PF3D7_1440800	Pf3D7_14_v3	1665463	+	2081	0.564	-0.415	1.543	1.464	1.171	0.25	0.25	-5.058	major facilitator superfamily domain-containing protein, putative	MFS6
5132	PF3D7_1420600	Pf3D7_14_v3	854094	-	1870	0.361	-0.266	0.988	4.566	1.171	0.25	0.25	-5.319	pantothenate kinase, putative	PANK
5340	PF3D7_1441000	Pf3D7_14_v3	1669980	-	1671	-0.253	-0.692	0.186	5.002	-1.17	0.25	0.25	-5.327	cytoplasmic tRNA 2-thiolation protein 2, putative	NCS2
1180	PF3D7_0522100	Pf3D7_05_v3	897465	-	2292	-0.635	-1.74	0.47	3.174	-1.17	0.25	0.25	-5.191	conserved Plasmodium protein, unknown function	NA
708	PF3D7_0401300	Pf3D7_04_v3	82247	+	1329	1.001	-0.744	2.746	-0.967	1.168	0.251	0.251	-4.884	rifin	RIF
1115	PF3D7_0515600	Pf3D7_05_v3	646659	+	5448	0.726	-0.539	1.991	-0.382	1.167	0.251	0.251	-4.927	conserved Plasmodium protein, unknown function	NA
2180	PF3D7_0821600	Pf3D7_08_v3	969690	+	2025	-0.186	-0.51	0.138	6.423	-1.168	0.251	0.251	-5.464	clp1-related protein, putative	NA
3279	PF3D7_1116700	Pf3D7_11_v3	630779	-	2103	-0.188	-0.516	0.14	9.999	-1.168	0.251	0.251	-5.73	dipeptidyl aminopeptidase 1	DPAP1
4255	PF3D7_1307200	Pf3D7_13_v3	331558	-	969	-0.257	-0.705	0.191	6.815	-1.168	0.251	0.251	-5.512	DnaJ protein, putative	NA
5582	PF3D7_1465000	Pf3D7_14_v3	2635841	+	837	-0.454	-1.244	0.336	2.77	-1.169	0.251	0.251	-5.145	conserved Plasmodium protein, unknown function	NA
5407	PF3D7_1447700	Pf3D7_14_v3	1943936	-	1029	-0.52	-1.426	0.386	0.806	-1.167	0.251	0.251	-4.981	conserved Plasmodium protein, unknown function	NA
2217	PF3D7_0825300	Pf3D7_08_v3	1095116	-	447	0.416	-0.309	1.14	2.837	1.167	0.252	0.252	-5.171	conserved protein, unknown function	NA
4407	PF3D7_1322100	Pf3D7_13_v3	920971	+	8479	0.231	-0.172	0.633	9.009	1.166	0.252	0.252	-5.691	histone-lysine N-methyltransferase SET2	SET2
5114	PF3D7_1418900	Pf3D7_14_v3	783078	-	2742	0.198	-0.147	0.543	8.547	1.165	0.252	0.252	-5.654	ATP-dependent RNA helicase DBP4, putative	DBP4
330	PF3D7_0212500	Pf3D7_02_v3	509525	+	12222	-0.228	-0.626	0.17	8.009	-1.165	0.252	0.252	-5.605	conserved Plasmodium protein, unknown function	NA
1646	PF3D7_0701700	Pf3D7_07_v3	72477	-	849	-0.57	-1.565	0.425	-0.69	-1.166	0.252	0.252	-4.899	exported protein family 1	EPF1
816	PF3D7_0412000	Pf3D7_04_v3	536774	+	2337	0.671	-0.501	1.842	0.41	1.164	0.253	0.253	-4.979	conserved Plasmodium protein, unknown function	NA
69	PF3D7_0102700	Pf3D7_01_v3	124517	+	968	0.489	-0.365	1.343	4.692	1.165	0.253	0.253	-5.351	merozoite-associated tryptophan-rich antigen	MaTrA
4050	PF3D7_1242200	Pf3D7_12_v3	1791156	+	1920	0.305	-0.227	0.836	5.485	1.164	0.253	0.253	-5.387	queuine tRNA-ribosyltransferase, putative	TGT
3475	PF3D7_1135800	Pf3D7_11_v3	1397506	+	480	0.275	-0.206	0.755	4.199	1.163	0.253	0.253	-5.257	conserved Plasmodium protein, unknown function	NA
5186	PF3D7_1425900	Pf3D7_14_v3	1012696	-	1570	0.243	-0.183	0.67	6.574	1.162	0.253	0.253	-5.506	conserved Plasmodium protein, unknown function	NA
2789	PF3D7_1009800	Pf3D7_10_v3	393765	-	4229	-0.216	-0.594	0.162	6.685	-1.164	0.253	0.253	-5.497	conserved Plasmodium membrane protein, unknown function	NA
279	PF3D7_0207600	Pf3D7_02_v3	303593	-	3435	0.843	-0.633	2.318	-0.327	1.162	0.254	0.254	-4.943	serine repeat antigen 5	SERA5
4864	PF3D7_1367600	Pf3D7_13_v3	2693921	-	939	0.247	-0.186	0.68	6.379	1.161	0.254	0.254	-5.493	ribosome biogenesis protein MRT4, putative	NA
473	PF3D7_0303100	Pf3D7_03_v3	162778	-	4326	-0.363	-0.999	0.273	3.357	-1.161	0.254	0.254	-5.204	conserved Plasmodium protein, unknown function	NA
3192	PF3D7_1108200	Pf3D7_11_v3	361408	+	495	-0.396	-1.09	0.298	3.146	-1.161	0.254	0.254	-5.11	D-tyrosyl-tRNA(Tyr) deacylase	DTD
4434	PF3D7_1324800	Pf3D7_13_v3	1036543	-	1989	-0.444	-1.22	0.333	5.154	-1.162	0.254	0.254	-5.384	dihydrofolate synthase/folylpolyglutamate synthase	DHFS-FPGS
2465	PF3D7_0915800	Pf3D7_09_v3	663918	+	654	-0.627	-1.725	0.471	-0.741	-1.162	0.254	0.254	-4.919	glycolipid transfer protein, putative	GLTP
425	PF3D7_0221700	Pf3D7_02_v3	869508	-	1617	1.336	-1.023	3.696	6.362	1.163	0.255	0.255	-5.491	Plasmodium exported protein, unknown function	NA
739	PF3D7_0404300	Pf3D7_04_v3	234014	-	3000	0.296	-0.224	0.817	9.307	1.159	0.255	0.255	-5.709	conserved Plasmodium protein, unknown function	NA
4860	PF3D7_1367200	Pf3D7_13_v3	2683581	+	1387	-0.324	-0.893	0.245	0.744	-1.159	0.255	0.255	-5.016	conserved Plasmodium protein, unknown function	NA
3997	PF3D7_1236900	Pf3D7_12_v3	1534519	-	1361	0.798	-0.608	2.204	-0.858	1.155	0.256	0.256	-4.891	conserved Plasmodium protein, unknown function	NA
1561	PF3D7_0626100	Pf3D7_06_v3	1056052	+	2478	0.437	-0.332	1.206	4.801	1.156	0.256	0.256	-5.374	oxidoreductase, short-chain dehydrogenase family, putative	NA
4301	PF3D7_1311700	Pf3D7_13_v3	497534	-	480	-0.34	-0.939	0.258	5.376	-1.157	0.256	0.256	-5.395	cytochrome c2 precursor, putative	NA
3099	PF3D7_1040200	Pf3D7_10_v3	1605930	+	1024	-0.919	-2.534	0.696	-3.768	-1.157	0.256	0.256	-4.785	stevor	NA
4180	PF3D7_1255100	Pf3D7_12_v3	2238210	+	1208	0.609	-0.464	1.682	1.174	1.154	0.257	0.257	-5.023	rifin	RIF
3982	PF3D7_1235400	Pf3D7_12_v3	1476529	-	3486	0.281	-0.215	0.776	4.602	1.152	0.257	0.257	-5.38	tetQ family GTPase, putative	NA
2967	PF3D7_1027100	Pf3D7_10_v3	1133838	-	2319	0.271	-0.207	0.749	9.272	1.153	0.257	0.257	-5.717	U3 small nucleolar ribonucleoprotein protein MPP10, putative	MPP10
4208	PF3D7_1302700	Pf3D7_13_v3	145174	+	5025	0.227	-0.173	0.627	9.145	1.154	0.257	0.257	-5.704	ATP-dependent RNA helicase DHR1, putative	NA
5118	PF3D7_1419300	Pf3D7_14_v3	802717	+	765	-0.194	-0.537	0.148	6.329	-1.154	0.257	0.257	-5.478	glutathione S-transferase	GST
2646	PF3D7_0933500	Pf3D7_09_v3	1325248	-	4539	-0.399	-1.103	0.305	2.48	-1.152	0.257	0.257	-5.114	gamma-tubulin complex component, putative	NA
96	PF3D7_0105400	Pf3D7_01_v3	226681	-	605	0.602	-0.462	1.666	-2.013	1.151	0.258	0.258	-4.866	conserved Plasmodium protein, unknown function	NA
97	PF3D7_0105400	Pf3D7_01_v3	226681	-	605	0.602	-0.462	1.666	-2.013	1.151	0.258	0.258	-4.866	conserved Plasmodium protein, unknown function	NA
2089	PF3D7_0812400	Pf3D7_08_v3	621805	-	1638	-0.206	-0.571	0.158	8.35	-1.152	0.258	0.258	-5.648	karyopherin alpha	KARalpha
1829	PF3D7_0719900	Pf3D7_07_v3	865927	+	10206	-0.252	-0.698	0.194	7.512	-1.151	0.258	0.258	-5.576	conserved Plasmodium membrane protein, unknown function	NA
4949	PF3D7_1403000	Pf3D7_14_v3	110114	+	2532	-0.474	-1.31	0.363	-0.63	-1.152	0.258	0.258	-4.94	conserved Plasmodium protein, unknown function	NA
2690	PF3D7_1000100	Pf3D7_10_v3	28490	+	7675	-0.566	-1.568	0.436	5.723	-1.152	0.258	0.258	-5.457	erythrocyte membrane protein 1, PfEMP1	VAR
2024	PF3D7_0806100	Pf3D7_08_v3	330651	+	2028	-0.365	-1.012	0.282	4.873	-1.148	0.259	0.259	-5.375	conserved Plasmodium protein, unknown function	NA
1751	PF3D7_0712000	Pf3D7_07_v3	527338	-	7794	-0.663	-1.84	0.513	4.129	-1.15	0.259	0.259	-5.298	erythrocyte membrane protein 1, PfEMP1	VAR
3844	PF3D7_1221700	Pf3D7_12_v3	865726	+	2856	0.395	-0.306	1.096	1.563	1.147	0.26	0.26	-5.054	FbpA domain protein, putative	NA
3797	PF3D7_1217000	Pf3D7_12_v3	674349	-	429	0.316	-0.245	0.877	3.357	1.145	0.26	0.26	-5.22	conserved Plasmodium protein, unknown function	NA
622	PF3D7_0317600	Pf3D7_03_v3	725015	+	1116	0.209	-0.162	0.581	9.468	1.146	0.26	0.26	-5.721	40S ribosomal protein S11, putative	RPS11
2947	PF3D7_1025000	Pf3D7_10_v3	1045608	-	4153	-0.157	-0.435	0.122	9.219	-1.145	0.26	0.26	-5.716	formin 2, putative	NA
3829	PF3D7_1220100	Pf3D7_12_v3	802544	+	1857	-0.231	-0.642	0.179	6.749	-1.145	0.26	0.26	-5.53	pre-mRNA-processing factor 17, putative	PRP17
4916	PF3D7_1373300	Pf3D7_13_v3	2877908	+	1234	-0.893	-2.479	0.693	-2.097	-1.145	0.26	0.26	-4.837	rifin	RIF
2254	PF3D7_0829000	Pf3D7_08_v3	1245211	+	5868	0.227	-0.177	0.632	5.533	1.143	0.261	0.261	-5.416	conserved Plasmodium membrane protein, unknown function	NA
4454	PF3D7_1326800	Pf3D7_13_v3	1127436	-	1326	-0.234	-0.65	0.182	4.057	-1.143	0.261	0.261	-5.25	syntaxin, Qa-SNARE family	SYN18
2009	PF3D7_0804600	Pf3D7_08_v3	268856	-	1841	-0.238	-0.662	0.186	6.862	-1.143	0.261	0.261	-5.54	U2 snRNA/tRNA pseudouridine synthase, putative	NA
1361	PF3D7_0606800	Pf3D7_06_v3	288377	-	900	-0.342	-0.95	0.266	4.505	-1.143	0.261	0.261	-5.337	probable protein, unknown function	NA
960	PF3D7_0500200	Pf3D7_05_v3	29233	-	72	-0.883	-2.454	0.688	-2.264	-1.143	0.261	0.261	-4.848	erythrocyte membrane protein 1 (PfEMP1), pseudogene	NA
2764	PF3D7_1007300	Pf3D7_10_v3	293850	+	2150	0.585	-0.458	1.628	-2.19	1.141	0.262	0.262	-4.877	RING zinc finger protein, putative	NA
4900	PF3D7_1371700	Pf3D7_13_v3	2821078	+	2215	0.578	-0.453	1.608	-0.015	1.14	0.262	0.262	-4.975	serine/threonine protein kinase, FIKK family	NA
1070	PF3D7_0511200	Pf3D7_05_v3	471055	+	3004	-0.361	-1.005	0.282	3.098	-1.142	0.262	0.262	-5.261	stearoyl-CoA desaturase	SCD
2638	PF3D7_0932700	Pf3D7_09_v3	1298865	-	3711	-0.406	-1.13	0.317	1.679	-1.142	0.262	0.262	-5.089	conserved Plasmodium protein, unknown function	NA
1390	PF3D7_0609600	Pf3D7_06_v3	408041	+	3962	0.562	-0.443	1.567	-0.5	1.138	0.263	0.263	-4.969	conserved Plasmodium protein, unknown function	NA
1399	PF3D7_0610500	Pf3D7_06_v3	445761	-	603	0.327	-0.257	0.911	4.102	1.139	0.263	0.263	-5.263	peptidyl-tRNA hydrolase PTRHD1, putative	NA
1248	PF3D7_0528800	Pf3D7_05_v3	1180425	-	1614	-0.235	-0.654	0.185	6.76	-1.138	0.263	0.263	-5.531	nucleolar preribosomal GTPase, putative	NA
4829	PF3D7_1364100	Pf3D7_13_v3	2568556	+	2391	-0.385	-1.071	0.302	2.687	-1.138	0.263	0.263	-5.226	6-cysteine protein	P92
5185	PF3D7_1425800	Pf3D7_14_v3	1009010	+	2901	-0.393	-1.094	0.309	2.269	-1.138	0.263	0.263	-5.17	conserved Plasmodium protein, unknown function	NA
5088	PF3D7_1416300	Pf3D7_14_v3	659539	+	1365	0.538	-0.426	1.502	3.223	1.136	0.264	0.264	-5.237	conserved protein, unknown function	NA
2757	PF3D7_1006600	Pf3D7_10_v3	272243	-	582	0.356	-0.282	0.995	2.92	1.135	0.264	0.264	-5.162	phosducin-like protein, putative	PhLP1
3568	PF3D7_1144800	Pf3D7_11_v3	1774750	+	1977	-0.248	-0.693	0.196	3.735	-1.137	0.264	0.264	-5.35	conserved Plasmodium protein, unknown function	NA
2556	PF3D7_0924700	Pf3D7_09_v3	1006773	+	1770	-0.263	-0.733	0.208	7.08	-1.136	0.264	0.264	-5.569	splicing factor 3A subunit 3, putative	SF3A3
2462	PF3D7_0915500	Pf3D7_09_v3	657418	+	1995	-0.494	-1.38	0.391	1.587	-1.136	0.264	0.264	-5.059	conserved Plasmodium protein, unknown function	NA
4471	PF3D7_1328500	Pf3D7_13_v3	1204186	-	3015	-0.644	-1.801	0.512	5.562	-1.138	0.264	0.264	-5.432	alpha/beta-hydrolase, putative	NA
1064	PF3D7_0510600	Pf3D7_05_v3	451355	+	80	-0.797	-2.225	0.631	-3.762	-1.136	0.264	0.264	-4.805	tRNA Leucine	NA
1165	PF3D7_0520600	Pf3D7_05_v3	843586	-	1232	0.462	-0.368	1.292	8.022	1.135	0.265	0.265	-5.636	bis(5'-nucleosyl)-tetraphosphatase [asymmetrical]	Ap4AH
5220	PF3D7_1429100	Pf3D7_14_v3	1142154	+	1638	0.386	-0.306	1.079	5.661	1.134	0.265	0.265	-5.503	apicoplast ribosomal protein L15 precursor, putative	NA
1401	PF3D7_0610700	Pf3D7_06_v3	452667	+	780	0.306	-0.243	0.855	4.806	1.133	0.265	0.265	-5.342	conserved Plasmodium protein, unknown function	NA
5002	PF3D7_1408100	Pf3D7_14_v3	297468	+	1356	0.232	-0.184	0.648	9.499	1.134	0.265	0.265	-5.738	plasmepsin III	HAP
767	PF3D7_0407200	Pf3D7_04_v3	363599	-	1335	0.204	-0.162	0.571	5.445	1.134	0.265	0.265	-5.421	peptidyl-tRNA hydrolase 2, putative	PTH2
1535	PF3D7_0623600	Pf3D7_06_v3	956765	+	1992	-0.176	-0.491	0.139	7.749	-1.134	0.265	0.265	-5.621	transcription or splicing factor-like protein, putative	NA
1871	PF3D7_0724100	Pf3D7_07_v3	1013295	-	3155	-0.291	-0.813	0.231	9.499	-1.134	0.265	0.265	-5.754	conserved Plasmodium protein, unknown function	NA
1547	PF3D7_0624800	Pf3D7_06_v3	1011429	-	3141	-0.509	-1.423	0.404	-0.529	-1.135	0.265	0.265	-4.987	conserved Plasmodium protein, unknown function	NA
714	PF3D7_0401800	Pf3D7_04_v3	103742	-	1862	0.573	-0.459	1.605	6.473	1.134	0.266	0.266	-5.532	Plasmodium exported protein (PHISTb), unknown function	PfD80
1834	PF3D7_0720400	Pf3D7_07_v3	882936	+	2053	0.278	-0.222	0.778	5.928	1.131	0.266	0.266	-5.481	ferrodoxin reductase-like protein	NA
2016	PF3D7_0805300	Pf3D7_08_v3	293113	-	3759	-0.519	-1.451	0.414	-1.232	-1.132	0.266	0.266	-4.915	conserved Plasmodium protein, unknown function	NA
3654	PF3D7_1202800	Pf3D7_12_v3	160716	+	540	0.295	-0.236	0.827	4.499	1.13	0.267	0.267	-5.326	conserved Plasmodium protein, unknown function	NA
3634	PF3D7_1200900	Pf3D7_12_v3	73229	-	1294	0.222	-0.178	0.622	6.974	1.129	0.267	0.267	-5.574	Plasmodium exported protein (PHISTc), unknown function	NA
2815	PF3D7_1012300	Pf3D7_10_v3	472546	-	841	-0.513	-1.438	0.411	-0.251	-1.129	0.267	0.267	-4.989	cytochrome b-c1 complex subunit 7, putative	QCR7
4126	PF3D7_1249700	Pf3D7_12_v3	2023455	-	2727	-0.617	-1.731	0.496	-0.931	-1.128	0.267	0.267	-4.903	conserved Plasmodium protein, unknown function	NA
1889	PF3D7_0726000	Pf3D7_07_v3	1086570	+	3788	-0.795	-2.233	0.644	8.915	-1.133	0.267	0.267	-5.699	28S ribosomal RNA	NA
807	PF3D7_0411100	Pf3D7_04_v3	504478	-	618	0.403	-0.324	1.131	1.544	1.127	0.268	0.268	-5.101	conserved Plasmodium protein, unknown function	NA
3527	PF3D7_1140700	Pf3D7_11_v3	1623447	-	6828	0.262	-0.211	0.736	8.046	1.126	0.268	0.268	-5.668	conserved Plasmodium protein, unknown function	NA
1423	PF3D7_0612900	Pf3D7_06_v3	531126	+	2061	-0.178	-0.498	0.143	9.717	-1.127	0.268	0.268	-5.763	nucleolar GTP-binding protein 1, putative	NA
5672	PF3D7_1474100	Pf3D7_14_v3	3023228	+	499	0.674	-0.546	1.895	-3.009	1.124	0.269	0.269	-4.841	mitochondrial ribosomal protein L20 precursor, putative	NA
3325	PF3D7_1121200	Pf3D7_11_v3	800781	-	678	0.494	-0.399	1.386	0.118	1.125	0.269	0.269	-4.999	conserved Plasmodium protein, unknown function	NA
1150	PF3D7_0519100	Pf3D7_05_v3	790399	+	375	0.457	-0.37	1.283	2.503	1.123	0.269	0.269	-5.234	mitochondrial ribosomal protein L14 precursor, putative	NA
731	PF3D7_0403500	Pf3D7_04_v3	195543	+	1203	-0.35	-0.984	0.283	4.502	-1.125	0.269	0.269	-5.31	ubiquitin specific protease, putative	NA
5256	PF3D7_1432700	Pf3D7_14_v3	1290468	-	992	-0.406	-1.141	0.329	1.016	-1.123	0.269	0.269	-5.048	protein-L-isoaspartate(D-aspartate) O-methyltransferase, putative	NA
4341	PF3D7_1315600	Pf3D7_13_v3	655207	-	2053	0.31	-0.252	0.872	4.235	1.121	0.27	0.27	-5.34	CDP-diacylglycerol--inositol 3-phosphatidyltransferase	PIS
4569	PF3D7_1338100	Pf3D7_13_v3	1542080	+	1902	0.263	-0.214	0.74	7.872	1.121	0.27	0.27	-5.653	26S proteasome regulatory subunit RPN3, putative	RPN3
3506	PF3D7_1138700	Pf3D7_11_v3	1525654	-	6091	0.232	-0.189	0.653	8.333	1.122	0.27	0.27	-5.681	conserved Plasmodium protein, unknown function	NA
4399	PF3D7_1321400	Pf3D7_13_v3	887271	+	2429	0.221	-0.18	0.622	3.775	1.122	0.27	0.27	-5.259	palmitoyltransferase DHHC8, putative	DHHC8
2434	PF3D7_0912700	Pf3D7_09_v3	562677	+	258	-0.287	-0.806	0.233	3.476	-1.122	0.27	0.27	-5.246	conserved Plasmodium protein, unknown function	NA
3804	PF3D7_1217600	Pf3D7_12_v3	695559	+	897	-0.347	-0.976	0.282	3.293	-1.122	0.27	0.27	-5.241	anaphase-promoting complex subunit 10, putative	APC10
4189	PF3D7_1300800	Pf3D7_13_v3	60097	-	1076	0.803	-0.655	2.262	-1.22	1.121	0.271	0.271	-4.949	erythrocyte membrane protein 1-like	VAR-like
692	PF3D7_0324600	Pf3D7_03_v3	1021998	+	1011	0.672	-0.55	1.893	-2.232	1.119	0.271	0.271	-4.896	stevor	NA
5225	PF3D7_1429600	Pf3D7_14_v3	1167144	+	660	-0.327	-0.922	0.267	2.315	-1.119	0.271	0.271	-5.133	conserved Plasmodium protein, unknown function	GEXP03
3326	PF3D7_1121300	Pf3D7_11_v3	801945	-	5137	-0.538	-1.516	0.44	-1.092	-1.118	0.271	0.271	-4.936	tyrosine kinase-like protein	TKL2
4685	PF3D7_1349700	Pf3D7_13_v3	1998815	+	957	0.397	-0.326	1.12	5.118	1.117	0.272	0.272	-5.427	peptidase, putative	NA
4769	PF3D7_1358100	Pf3D7_13_v3	2305436	-	2205	0.233	-0.191	0.657	10.092	1.116	0.272	0.272	-5.811	small subunit rRNA processing factor, putative	NA
5133	PF3D7_1420700	Pf3D7_14_v3	860011	+	3070	0.211	-0.173	0.594	11.336	1.117	0.272	0.272	-5.876	surface protein P113	P113
2032	PF3D7_0806900	Pf3D7_08_v3	368607	-	1140	-0.296	-0.835	0.243	2.986	-1.116	0.272	0.272	-5.177	conserved Plasmodium protein, unknown function	NA
3528	PF3D7_1140800	Pf3D7_11_v3	1633920	+	2412	-0.305	-0.859	0.25	6.953	-1.118	0.272	0.272	-5.581	conserved Plasmodium protein, unknown function	NA
[truncated: 3,801 more rows]

## Sheet: significant_up
	GeneID	Chr	Start	Strand	Length	logFC	CI.L	CI.R	AveExpr	t	P.Value	adj.P.Val	B	[Product Description]	[Gene Name or Symbol]
156	PF3D7_0111300	Pf3D7_01_v3	431539	-	3504	2.506	1.427	3.584	-0.835	4.724	4.07e-05	4.07e-05	1.509	replication factor c protein, putative	NA
1002	PF3D7_0504400	Pf3D7_05_v3	172150	+	2268	2.468	1.373	3.562	-1.67	4.586	6.1e-05	6.1e-05	1.029	ATP-dependent helicase, putative	NA
3156	PF3D7_1104700	Pf3D7_11_v3	204593	-	1202	1.487	0.805	2.17	3.149	4.432	9.57e-05	9.57e-05	1.291	DNA-directed RNA polymerase III subunit RPC8, putative	RPC25
3157	PF3D7_1104700	Pf3D7_11_v3	204593	-	1202	1.487	0.805	2.17	3.149	4.432	9.57e-05	9.57e-05	1.291	DNA-directed RNA polymerase III subunit RPC8, putative	RPC25
3780	PF3D7_1215300	Pf3D7_12_v3	629009	-	659	1.844	0.966	2.722	1.82	4.273	0.000152	0.000152	0.817	10 kDa chaperonin	CPN10
2278	PF3D7_0831400	Pf3D7_08_v3	1344405	-	1083	1.443	0.753	2.133	4.737	4.254	0.00016	0.00016	0.895	Plasmodium exported protein, unknown function	NA
3427	PF3D7_1131200	Pf3D7_11_v3	1199253	+	2553	2.427	1.257	3.596	1.187	4.223	0.00018	0.00018	0.652	conserved Plasmodium protein, unknown function	NA
3329	PF3D7_1121600	Pf3D7_11_v3	815386	-	937	0.61	0.316	0.904	9.981	4.214	0.00018	0.00018	0.68	exported protein 1	EXP1
4914	PF3D7_1373100	Pf3D7_13_v3	2871860	-	1229	2.466	1.259	3.673	-2.984	4.154	0.000214	0.000214	-0.051	rifin	RIF
5619	PF3D7_1468700	Pf3D7_14_v3	2825370	+	1549	0.552	0.281	0.823	11.756	4.148	0.000217	0.000217	0.439	eukaryotic initiation factor 4A	eIF4A
2334	PF3D7_0903200	Pf3D7_09_v3	133762	-	1826	1.328	0.676	1.979	4.998	4.146	0.000219	0.000219	0.614	ras-related protein RAB7	RAB7
4552	PF3D7_1336400	Pf3D7_13_v3	1477961	-	2064	0.922	0.469	1.374	4.682	4.142	0.000221	0.000221	0.603	RanBPM and CLTH-like protein, putative	NA
2660	PF3D7_0934900	Pf3D7_09_v3	1364256	-	1744	0.963	0.484	1.441	5.318	4.09	0.000257	0.000257	0.467	conserved Plasmodium protein, unknown function	NA
3708	PF3D7_1208300	Pf3D7_12_v3	388545	+	603	1.585	0.793	2.376	1.912	4.072	0.000271	0.000271	0.318	mitochondrial ACP precursor, putative	NA
2146	PF3D7_0818200	Pf3D7_08_v3	830006	+	1449	0.61	0.301	0.918	10.478	4.023	0.000311	0.000311	0.145	14-3-3 protein	14-3-3I
1938	PF3D7_0730800	Pf3D7_07_v3	1321306	+	1062	0.558	0.274	0.841	10.67	3.995	0.000337	0.000337	0.063	Plasmodium exported protein, unknown function, unspecified product	NA
1686	PF3D7_0705700	Pf3D7_07_v3	285472	-	695	0.663	0.325	1.001	8.234	3.988	0.000344	0.000344	0.136	40S ribosomal protein S29, putative	NA
3158	PF3D7_1104800	Pf3D7_11_v3	207440	+	2293	1.238	0.605	1.87	2.901	3.98	0.000352	0.000352	0.162	metabolite/drug transporter, putative	NA
2316	PF3D7_0901400	Pf3D7_09_v3	70521	+	1218	5.348	2.63	8.066	-2.065	4.025	0.000377	0.000377	-0.254	rifin	RIF
5286	PF3D7_1435700	Pf3D7_14_v3	1445085	-	4407	1.708	0.83	2.586	2.651	3.955	0.000378	0.000378	0.094	ataxin-2 like protein, putative	NA
5287	PF3D7_1435700	Pf3D7_14_v3	1445085	-	4407	1.708	0.83	2.586	2.651	3.955	0.000378	0.000378	0.094	ataxin-2 like protein, putative	NA
612	PF3D7_0316600	Pf3D7_03_v3	669302	-	1572	1.711	0.829	2.593	8.693	3.964	0.000425	0.000425	-0.066	formate-nitrite transporter	FNT
1615	PF3D7_0631400	Pf3D7_06_v3	1318327	-	790	2.132	0.991	3.272	-1.011	3.8	0.000586	0.000586	-0.525	Pfmc-2TM Maurer's cleft two transmembrane protein	MC-2TM
1584	PF3D7_0628300	Pf3D7_06_v3	1170813	-	2884	1.549	0.715	2.384	6.948	3.788	0.000653	0.000653	-0.407	choline/ethanolaminephosphotransferase, putative	CEPT
187	PF3D7_0114500	Pf3D7_01_v3	558201	-	508	3.155	1.438	4.873	0.561	3.75	0.000738	0.000738	-0.558	Plasmodium exported protein (hyp10), unknown function	NA
309	PF3D7_0210400	Pf3D7_02_v3	425689	+	809	2.175	0.981	3.369	-1.585	3.706	0.000762	0.000762	-0.835	50S ribosomal protein L33, putative	NA
1966	PF3D7_0800500	Pf3D7_08_v3	56352	-	1352	1.805	0.808	2.802	0.538	3.681	0.000815	0.000815	-0.666	rifin	RIF
599	PF3D7_0315400	Pf3D7_03_v3	630611	-	771	1.737	0.769	2.706	0.185	3.647	0.000897	0.000897	-0.764	conserved Plasmodium protein, unknown function	NA
3173	PF3D7_1106300	Pf3D7_11_v3	263604	-	2967	1.623	0.715	2.531	3.037	3.636	0.000925	0.000925	-0.662	exonuclease, putative	NA
4159	PF3D7_1253000	Pf3D7_12_v3	2168181	+	1579	1.801	0.796	2.807	4.871	3.654	0.000942	0.000942	-0.683	gametocyte erythrocyte cytosolic protein	GECO
345	PF3D7_0214000	Pf3D7_02_v3	566121	+	1774	0.546	0.24	0.852	8.739	3.626	0.000949	0.000949	-0.829	T-complex protein 1 subunit theta	CCT8
4616	PF3D7_1342800	Pf3D7_13_v3	1679693	+	1752	0.955	0.417	1.492	5.869	3.613	0.000986	0.000986	-0.758	phosphoenolpyruvate carboxykinase	PEPCK
115	PF3D7_0107200	Pf3D7_01_v3	297362	+	2036	2.181	0.94	3.423	-1.999	3.573	0.0011	0.0011	-1.078	carbon catabolite repressor protein 4, putative	NA
1756	PF3D7_0712500	Pf3D7_07_v3	562906	-	1255	2.533	1.08	3.986	-2.451	3.546	0.00119	0.00119	-1.184	rifin, pseudogene	RIF
1882	PF3D7_0725200	Pf3D7_07_v3	1070980	+	758	0.531	0.224	0.838	6.645	3.514	0.00129	0.00129	-1.033	mago nashi protein homologue, putative	NA
4170	PF3D7_1254100	Pf3D7_12_v3	2204724	+	991	1.576	0.664	2.489	-3.616	3.513	0.0013	0.0013	-1.357	stevor	NA
837	PF3D7_0414100	Pf3D7_04_v3	634029	-	4877	2.473	1.033	3.912	-2.003	3.493	0.00137	0.00137	-1.279	conserved Plasmodium membrane protein, unknown function	NA
2279	PF3D7_0831500	Pf3D7_08_v3	1353456	+	1214	0.566	0.236	0.895	9.554	3.492	0.00138	0.00138	-1.212	Plasmodium exported protein (PHIST), unknown function	NA
2497	PF3D7_0919000	Pf3D7_09_v3	781368	-	1308	0.444	0.185	0.703	10.061	3.488	0.00139	0.00139	-1.234	nucleosome assembly protein	NAPS
3618	PF3D7_1149700	Pf3D7_11_v3	2004754	+	258	3.457	1.438	5.477	-1.677	3.492	0.00147	0.00147	-1.236	Plasmodium exported protein (PHISTa), unknown function	NA
3398	PF3D7_1128400	Pf3D7_11_v3	1104216	-	2290	0.91	0.376	1.445	5.484	3.462	0.00149	0.00149	-1.114	geranylgeranyl pyrophosphate synthase, putative	GGPPS
1288	PF3D7_0532600	Pf3D7_05_v3	1318531	-	699	2.975	1.206	4.744	0.925	3.433	0.00175	0.00175	-1.243	Plasmodium exported protein, unknown function	NA
1153	PF3D7_0519400	Pf3D7_05_v3	798036	-	740	0.564	0.226	0.903	9.811	3.387	0.00183	0.00183	-1.478	40S ribosomal protein S24	RPS24
3592	PF3D7_1147300	Pf3D7_11_v3	1883775	+	4086	2.197	0.873	3.522	1.255	3.38	0.00193	0.00193	-1.303	conserved Plasmodium protein, unknown function	NA
5693	PF3D7_1476200	Pf3D7_14_v3	3133951	+	1701	1.45	0.576	2.325	6.368	3.382	0.00196	0.00196	-1.4	Plasmodium exported protein (PHISTb), unknown function	NA
3283	PF3D7_1117100	Pf3D7_11_v3	652579	+	1398	1.645	0.648	2.642	-1.754	3.355	0.00199	0.00199	-1.521	deubiquinating/deneddylating enzyme	UCH54
2786	PF3D7_1009500	Pf3D7_10_v3	383044	-	1750	1.183	0.461	1.905	1.631	3.331	0.00212	0.00212	-1.389	metalloprotease, putative	NA
2268	PF3D7_0830400	Pf3D7_08_v3	1294022	+	701	0.583	0.227	0.938	8.688	3.332	0.00212	0.00212	-1.57	conserved Plasmodium protein, unknown function	NA
3114	PF3D7_1100400	Pf3D7_11_v3	48112	+	1196	2.185	0.85	3.52	-2.556	3.329	0.00214	0.00214	-1.638	rifin	RIF
4228	PF3D7_1304500	Pf3D7_13_v3	235800	-	636	1.254	0.486	2.021	0.471	3.323	0.00217	0.00217	-1.464	small heat shock protein, putative	NA
4651	PF3D7_1346300	Pf3D7_13_v3	1849528	+	990	0.412	0.159	0.665	10.546	3.318	0.0022	0.0022	-1.689	DNA/RNA-binding protein Alba 2	ALBA2
3395	PF3D7_1128100	Pf3D7_11_v3	1094909	-	1023	0.599	0.231	0.967	6.2	3.31	0.00225	0.00225	-1.514	prefoldin subunit 5, putative	NA
3214	PF3D7_1110400	Pf3D7_11_v3	414797	+	4760	0.505	0.195	0.816	11.296	3.307	0.00226	0.00226	-1.749	asparagine-rich antigen	NA
4780	PF3D7_1359200	Pf3D7_13_v3	2350437	-	2384	1.08	0.41	1.75	3.022	3.279	0.00245	0.00245	-1.492	high mobility group protein B4, putative	HMGB4
173	PF3D7_0113000	Pf3D7_01_v3	487892	-	2236	0.966	0.364	1.568	13.231	3.272	0.00263	0.00263	-1.936	glutamic acid-rich protein	GARP
1525	PF3D7_0622600	Pf3D7_06_v3	914743	+	687	1.512	0.564	2.46	-1.231	3.243	0.00269	0.00269	-1.704	cytochrome b-c1 complex subunit 9, putative	QCR9
1996	PF3D7_0803300	Pf3D7_08_v3	208451	+	1841	1.724	0.638	2.81	-1.988	3.228	0.0028	0.0028	-1.774	mitogen-activated protein kinase organizer 1, putative	MORG1
3522	PF3D7_1140200	Pf3D7_11_v3	1601257	-	1822	1.082	0.393	1.77	5.612	3.195	0.00305	0.00305	-1.774	conserved Plasmodium protein, unknown function	NA
3534	PF3D7_1141400	Pf3D7_11_v3	1663621	+	1630	1.946	0.707	3.186	-1.189	3.194	0.00306	0.00306	-1.785	phosphatidylinositol N-acetylglucosaminyltransferase subunit H, putative	PIGH
172	PF3D7_0112900	Pf3D7_01_v3	486500	+	687	1.381	0.502	2.261	4.368	3.196	0.00309	0.00309	-1.724	Plasmodium exported protein, unknown function	NA
2735	PF3D7_1004400	Pf3D7_10_v3	207000	-	2643	0.983	0.355	1.611	5.594	3.183	0.00315	0.00315	-1.803	RNA-binding protein, putative	NA
3776	PF3D7_1214900	Pf3D7_12_v3	618764	+	1348	1.204	0.428	1.98	1.064	3.155	0.0034	0.0034	-1.785	conserved Plasmodium membrane protein, unknown function	NA
1841	PF3D7_0721100	Pf3D7_07_v3	916434	+	735	1.147	0.406	1.888	3.681	3.147	0.00347	0.00347	-1.815	conserved Plasmodium protein, unknown function	NA
5467	PF3D7_1453700	Pf3D7_14_v3	2207027	+	1294	0.531	0.187	0.876	9.658	3.135	0.00358	0.00358	-2.099	co-chaperone p23	P23
3613	PF3D7_1149200	Pf3D7_11_v3	1976407	+	3398	0.656	0.228	1.084	9.847	3.119	0.00373	0.00373	-2.149	ring-infected erythrocyte surface antigen	RESA
716	PF3D7_0402000	Pf3D7_04_v3	114601	-	1458	1.466	0.506	2.425	3.656	3.109	0.00388	0.00388	-1.907	Plasmodium exported protein (PHISTa), unknown function	NA
3174	PF3D7_1106400	Pf3D7_11_v3	267547	+	351	1.838	0.626	3.05	-2.157	3.083	0.00409	0.00409	-2.06	conserved Plasmodium protein, unknown function	NA
1649	PF3D7_0702000	Pf3D7_07_v3	84797	+	878	1.142	0.39	1.894	8.349	3.098	0.00411	0.00411	-2.166	Plasmodium exported protein (hyp12), unknown function	NA
2710	PF3D7_1002000	Pf3D7_10_v3	103118	-	1566	0.865	0.293	1.438	7.153	3.073	0.00421	0.00421	-2.133	Plasmodium exported protein (hyp2), unknown function	NA
380	PF3D7_0217400	Pf3D7_02_v3	717692	+	590	0.793	0.264	1.322	3.012	3.049	0.00448	0.00448	-1.999	conserved Plasmodium protein, unknown function	NA
2711	PF3D7_1002100	Pf3D7_10_v3	106653	-	2010	0.502	0.166	0.838	10.491	3.041	0.00457	0.00457	-2.36	EMP1-trafficking protein	PTP5
3375	PF3D7_1126200	Pf3D7_11_v3	1023790	-	707	0.441	0.145	0.737	9.393	3.028	0.00472	0.00472	-2.328	40S ribosomal protein S18, putative	NA
1801	PF3D7_0717000	Pf3D7_07_v3	738578	+	2632	1.658	0.543	2.773	-1.056	3.025	0.00476	0.00476	-2.124	conserved Plasmodium membrane protein, unknown function	NA
5277	PF3D7_1434800	Pf3D7_14_v3	1410139	+	759	0.932	0.301	1.562	3.891	3.006	0.00501	0.00501	-2.141	mitochondrial acidic protein MAM33, putative	NA
1648	PF3D7_0701900	Pf3D7_07_v3	79890	-	3054	2.973	0.968	4.978	6.8	3.044	0.00519	0.00519	-2.259	Plasmodium exported protein, unknown function	NA
1650	PF3D7_0702100	Pf3D7_07_v3	88685	+	2202	1.785	0.576	2.995	6.691	3.021	0.00527	0.00527	-2.291	Plasmodium exported protein (PHISTb), unknown function, pseudogene	NA
1598	PF3D7_0629700	Pf3D7_06_v3	1221941	+	20982	0.451	0.141	0.761	8.901	2.956	0.00569	0.00569	-2.483	SET domain protein, putative	SET1
4368	PF3D7_1318300	Pf3D7_13_v3	753910	+	5523	1.307	0.406	2.209	3.175	2.95	0.00577	0.00577	-2.219	conserved Plasmodium protein, unknown function	NA
3136	PF3D7_1102700	Pf3D7_11_v3	128789	+	276	0.649	0.2	1.098	10.338	2.94	0.00592	0.00592	-2.579	early transcribed membrane protein 11.1	ETRAMP11.1
2702	PF3D7_1001200	Pf3D7_10_v3	70547	-	273	0.947	0.288	1.606	2.374	2.922	0.0062	0.0062	-2.262	acyl-CoA binding protein, isoform 2, ACBP2	ACBP2
1352	PF3D7_0605900	Pf3D7_06_v3	247640	+	1527	1.247	0.38	2.114	6.522	2.932	0.00626	0.00626	-2.448	long chain polyunsaturated fatty acid elongation enzyme, putative	NA
1398	PF3D7_0610400	Pf3D7_06_v3	444747	+	411	1.384	0.418	2.35	1.845	2.913	0.00635	0.00635	-2.279	histone H3	H3
3324	PF3D7_1121100	Pf3D7_11_v3	794254	-	5308	0.744	0.223	1.266	8.551	2.902	0.00652	0.00652	-2.592	conserved Plasmodium protein, unknown function	NA
2987	PF3D7_1029000	Pf3D7_10_v3	1187503	-	2087	1.865	0.557	3.173	-2.849	2.9	0.00656	0.00656	-2.416	conserved Plasmodium protein, unknown function, pseudogene	NA
3010	PF3D7_1031200	Pf3D7_10_v3	1257384	+	1095	1.458	0.434	2.481	2.033	2.896	0.00663	0.00663	-2.325	MORN repeat-containing protein 1	MORN1
2667	PF3D7_0935600	Pf3D7_09_v3	1405192	+	1831	0.679	0.201	1.156	11.019	2.89	0.00673	0.00673	-2.753	gametocytogenesis-implicated protein	GIG
5204	PF3D7_1427600	Pf3D7_14_v3	1085603	+	1437	1.089	0.322	1.855	1.446	2.888	0.00677	0.00677	-2.331	CorA-like Mg2+ transporter protein, putative	MIT3
5020	PF3D7_1409800	Pf3D7_14_v3	383188	+	1545	1.181	0.345	2.016	0.951	2.875	0.00699	0.00699	-2.357	CUGBP Elav-like family member 2, putative	CELF2
5093	PF3D7_1416800	Pf3D7_14_v3	682778	+	2025	1.101	0.322	1.88	1.587	2.875	0.00699	0.00699	-2.357	lysine--tRNA ligase, putative	NA
2128	PF3D7_0816400	Pf3D7_08_v3	757224	+	984	1.729	0.504	2.954	-2.732	2.871	0.00705	0.00705	-2.465	EF-hand calcium-binding domain-containing protein	NA
4847	PF3D7_1365900	Pf3D7_13_v3	2632534	-	727	0.416	0.12	0.713	9.258	2.86	0.00726	0.00726	-2.712	ubiquitin-60S ribosomal protein L40	NA
3669	PF3D7_1204300	Pf3D7_12_v3	205491	-	486	0.603	0.171	1.034	9.281	2.841	0.00762	0.00762	-2.76	eukaryotic translation initiation factor 5A	EIF5A
3388	PF3D7_1127500	Pf3D7_11_v3	1067197	+	3023	1.132	0.315	1.949	0.2	2.819	0.00804	0.00804	-2.469	protein disulfide-isomerase, putative	NA
5653	PF3D7_1472100	Pf3D7_14_v3	2941600	-	1660	0.493	0.137	0.849	7.545	2.814	0.00814	0.00814	-2.739	protein transport protein YIP1, putative	YIP1
3726	PF3D7_1210000	Pf3D7_12_v3	452595	+	1234	1.279	0.35	2.208	-0.372	2.8	0.00845	0.00845	-2.52	50S ribosomal protein L1, apicoplast, putative	RPL1
1468	PF3D7_0617200	Pf3D7_06_v3	717050	+	1868	0.417	0.113	0.72	10.216	2.794	0.00857	0.00857	-2.914	conserved Plasmodium protein, unknown function	NA
2795	PF3D7_1010400	Pf3D7_10_v3	415404	-	2068	0.69	0.187	1.193	5.831	2.792	0.00861	0.00861	-2.693	conserved Plasmodium protein, unknown function	NA
1972	PF3D7_0800900	Pf3D7_08_v3	83128	+	777	1.06	0.284	1.836	5.146	2.779	0.00892	0.00892	-2.689	Plasmodium exported protein (hyp7), unknown function, pseudogene	NA
2015	PF3D7_0805200	Pf3D7_08_v3	290902	+	282	1.558	0.415	2.702	2.581	2.774	0.00911	0.00911	-2.585	gamete release protein, putative	GAMER
1228	PF3D7_0526800	Pf3D7_05_v3	1120704	-	1107	0.587	0.154	1.021	8.066	2.755	0.00944	0.00944	-2.891	conserved Plasmodium protein, unknown function	NA
327	PF3D7_0212200	Pf3D7_02_v3	489904	-	915	0.68	0.178	1.182	4.416	2.754	0.00947	0.00947	-2.675	mitochondrial ribosomal protein L12 precursor, putative	NA
3995	PF3D7_1236700	Pf3D7_12_v3	1529821	-	1527	1.142	0.298	1.986	2.032	2.753	0.00949	0.00949	-2.601	S-adenosyl-methyltransferase, putative	NA
943	PF3D7_0424600	Pf3D7_04_v3	1113345	-	1142	0.511	0.133	0.89	9.094	2.75	0.00956	0.00956	-2.959	Plasmodium exported protein (PHISTb), unknown function	NA
1896	PF3D7_0726700	Pf3D7_07_v3	1143303	-	513	0.904	0.234	1.574	0.141	2.745	0.00968	0.00968	-2.617	conserved Plasmodium protein, unknown function	NA
1645	PF3D7_0701600	Pf3D7_07_v3	71049	+	812	2.409	0.623	4.194	-0.679	2.751	0.00981	0.00981	-2.629	Pfmc-2TM Maurer's cleft two transmembrane protein	MC-2TM
398	PF3D7_0219200	Pf3D7_02_v3	772316	+	375	0.503	0.13	0.877	8.276	2.74	0.00981	0.00981	-2.937	40S ribosomal protein S30	NA
2673	PF3D7_0936200	Pf3D7_09_v3	1433332	-	777	1.301	0.334	2.268	4.12	2.739	0.00995	0.00995	-2.719	Plasmodium exported protein (hyp11), unknown function	NA
5631	PF3D7_1469900	Pf3D7_14_v3	2866358	+	1826	1.358	0.346	2.369	-0.133	2.729	0.0101	0.0101	-2.653	conserved Plasmodium protein, unknown function	NA
522	PF3D7_0308000	Pf3D7_03_v3	353549	+	1497	1.694	0.426	2.963	-1.045	2.716	0.0104	0.0104	-2.689	DNA polymerase delta small subunit, putative	NA
2273	PF3D7_0830900	Pf3D7_08_v3	1317600	-	742	1.293	0.324	2.262	4.126	2.718	0.0105	0.0105	-2.783	Plasmodium exported protein, unknown function	NA
4759	PF3D7_1357100	Pf3D7_13_v3	2268901	+	1332	0.509	0.126	0.893	11.464	2.704	0.0107	0.0107	-3.174	elongation factor 1-alpha	NA
2759	PF3D7_1006800	Pf3D7_10_v3	277621	+	1548	0.54	0.133	0.946	9.961	2.7	0.0108	0.0108	-3.116	single-strand telomeric DNA-binding protein GBP2, putative	GBP2
5365	PF3D7_1443500	Pf3D7_14_v3	1780992	-	2589	1.686	0.413	2.96	0.514	2.693	0.011	0.011	-2.714	poly(A)-specific ribonuclease PARN, putative	PARN
3711	PF3D7_1208600	Pf3D7_12_v3	402300	+	228	0.901	0.22	1.583	3.599	2.689	0.0111	0.0111	-2.782	mitochondrial import inner membrane translocase subunit TIM10, putative	TIM10
2839	PF3D7_1014700	Pf3D7_10_v3	595308	+	915	0.673	0.164	1.181	4.259	2.69	0.0111	0.0111	-2.822	prohibitin, putative	NA
1301	PF3D7_0600800	Pf3D7_06_v3	35355	-	1241	2.075	0.503	3.647	-2.931	2.685	0.0112	0.0112	-2.793	rifin, pseudogene	RIF
4554	PF3D7_1336600	Pf3D7_13_v3	1480954	+	749	0.761	0.183	1.34	1.711	2.679	0.0114	0.0114	-2.748	conserved Plasmodium protein, unknown function	NA
3229	PF3D7_1111900	Pf3D7_11_v3	457936	+	1262	1.501	0.36	2.641	-1.831	2.676	0.0115	0.0115	-2.781	conserved Plasmodium protein, unknown function	NA
384	PF3D7_0217800	Pf3D7_02_v3	734272	+	324	0.437	0.104	0.771	8.66	2.67	0.0116	0.0116	-3.105	40S ribosomal protein S26	RPS26
4443	PF3D7_1325700	Pf3D7_13_v3	1068050	-	586	1.699	0.399	2.999	-2.212	2.659	0.012	0.012	-2.819	conserved Plasmodium protein, unknown function	NA
4485	PF3D7_1329900	Pf3D7_13_v3	1269311	+	2124	1.173	0.273	2.073	-0.256	2.651	0.0122	0.0122	-2.8	conserved Plasmodium protein, unknown function	NA
479	PF3D7_0303700	Pf3D7_03_v3	191245	-	1347	2.038	0.471	3.605	-0.875	2.647	0.0124	0.0124	-2.815	lipoamide acyltransferase component of branched-chain alpha-keto acid dehydrogenase complex	BCKDH-E2
4442	PF3D7_1325600	Pf3D7_13_v3	1067097	+	589	1.57	0.363	2.776	-2.718	2.645	0.0124	0.0124	-2.853	mitochondrial fission 1 protein, putative	FIS1
2205	PF3D7_0824100	Pf3D7_08_v3	1052771	+	1221	1.624	0.371	2.876	-2.27	2.636	0.0126	0.0126	-2.865	exonuclease, putative	NA
2850	PF3D7_1015600	Pf3D7_10_v3	627044	-	1997	0.871	0.195	1.548	4.879	2.619	0.0132	0.0132	-3.011	heat shock protein 60	HSP60
1820	PF3D7_0719000	Pf3D7_07_v3	838135	+	462	0.647	0.145	1.149	4.154	2.619	0.0132	0.0132	-2.957	conserved Plasmodium protein, unknown function	NA
4689	PF3D7_1350100	Pf3D7_13_v3	2005962	-	1989	0.41	0.092	0.729	9.438	2.618	0.0132	0.0132	-3.264	lysine--tRNA ligase	KRS1
4245	PF3D7_1306200	Pf3D7_13_v3	289564	-	1437	1.46	0.325	2.596	-3.779	2.615	0.0133	0.0133	-2.934	conserved Plasmodium protein, unknown function	NA
1807	PF3D7_0717600	Pf3D7_07_v3	758720	-	4158	1.807	0.402	3.212	2.158	2.623	0.0134	0.0134	-2.892	conserved Plasmodium protein, unknown function	NA
872	PF3D7_0417500	Pf3D7_04_v3	777200	-	2225	0.944	0.204	1.685	0.83	2.594	0.014	0.014	-2.903	memo-like protein	NA
3448	PF3D7_1133300	Pf3D7_11_v3	1290501	+	1101	1.244	0.267	2.221	-2.329	2.59	0.0141	0.0141	-2.935	LEM3/CDC50 family protein, putative	NA
4989	PF3D7_1406800	Pf3D7_14_v3	246380	-	1342	1.205	0.259	2.15	-0.274	2.591	0.0141	0.0141	-2.904	glideosome associated protein with multiple membrane spans 3	GAPM3
641	PF3D7_0319500	Pf3D7_03_v3	815569	+	1287	0.451	0.097	0.806	7.303	2.591	0.0141	0.0141	-3.208	RNA-binding protein, putative	NA
4307	PF3D7_1312300	Pf3D7_13_v3	519599	-	843	1.254	0.266	2.242	-2.798	2.582	0.0144	0.0144	-2.968	mitochondrial ribosomal protein S35 precursor, putative	NA
4987	PF3D7_1406600	Pf3D7_14_v3	239747	+	4026	1.182	0.25	2.114	0.6	2.579	0.0145	0.0145	-2.93	ATP-dependent Clp protease regulatory subunit ClpC, putative	ClpC
610	PF3D7_0316400	Pf3D7_03_v3	662126	-	3027	1.079	0.219	1.94	0.195	2.551	0.0155	0.0155	-2.983	conserved Plasmodium protein, unknown function	NA
1419	PF3D7_0612500	Pf3D7_06_v3	522300	-	366	0.692	0.14	1.244	2.183	2.549	0.0156	0.0156	-3.005	conserved Plasmodium protein, unknown function	NA
1596	PF3D7_0629500	Pf3D7_06_v3	1213948	-	2058	0.366	0.074	0.658	7.545	2.548	0.0156	0.0156	-3.313	amino acid transporter, putative	NA
710	PF3D7_0401500	Pf3D7_04_v3	89153	+	1032	1.103	0.221	1.984	2.996	2.544	0.0158	0.0158	-3.052	stevor, pseudogene	NA
400	PF3D7_0219400	Pf3D7_02_v3	774815	+	1222	0.539	0.107	0.971	5.757	2.536	0.0161	0.0161	-3.222	ribosome associated membrane protein RAMP4, putative, unspecified product	NA
401	PF3D7_0219400	Pf3D7_02_v3	774815	+	1222	0.539	0.107	0.971	5.757	2.536	0.0161	0.0161	-3.222	ribosome associated membrane protein RAMP4, putative, unspecified product	NA
2716	PF3D7_1002500	Pf3D7_10_v3	123770	-	1113	0.56	0.11	1.01	7.084	2.532	0.0162	0.0162	-3.324	conserved Plasmodium protein, unknown function	NA
176	PF3D7_0113300	Pf3D7_01_v3	504938	-	1937	0.677	0.133	1.222	8.325	2.53	0.0163	0.0163	-3.402	Plasmodium exported protein (hyp1), unknown function	NA
5382	PF3D7_1445200	Pf3D7_14_v3	1856700	+	2609	0.442	0.087	0.798	8.657	2.53	0.0163	0.0163	-3.41	ATP-dependent RNA helicase MAK5, putative	MAK5
2731	PF3D7_1004000	Pf3D7_10_v3	179344	-	883	0.393	0.076	0.71	9.73	2.524	0.0165	0.0165	-3.476	60S ribosomal protein L13, putative	NA
616	PF3D7_0317000	Pf3D7_03_v3	682795	-	891	0.56	0.109	1.012	7.261	2.523	0.0166	0.0166	-3.347	proteasome subunit alpha type-3, putative	NA
4746	PF3D7_1355800	Pf3D7_13_v3	2214445	+	641	0.518	0.1	0.935	4.712	2.52	0.0167	0.0167	-3.185	splicing factor 3B subunit 5, putative	SF3B5
3428	PF3D7_1131300	Pf3D7_11_v3	1201922	-	1698	1.829	0.345	3.313	-1.563	2.507	0.0172	0.0172	-3.067	conserved Plasmodium protein, unknown function	NA
1589	PF3D7_0628800	Pf3D7_06_v3	1185996	-	2649	1.255	0.235	2.275	-0.154	2.503	0.0174	0.0174	-3.064	glutamyl-tRNA(Gln) amidotransferase subunit B	GATB
4090	PF3D7_1246200	Pf3D7_12_v3	1920784	+	1131	1.038	0.193	1.882	4.362	2.5	0.0175	0.0175	-3.22	actin I	ACT1
5696	PF3D7_1476500	Pf3D7_14_v3	3147490	+	1095	2.261	0.423	4.099	1.015	2.513	0.0176	0.0176	-3.08	probable protein, unknown function	NA
2968	PF3D7_1027200	Pf3D7_10_v3	1138002	+	1563	0.506	0.094	0.919	6.159	2.495	0.0177	0.0177	-3.34	mitochondrial ribosomal protein S22 precursor, putative	NA
5567	PF3D7_1463500	Pf3D7_14_v3	2577974	+	1406	0.478	0.088	0.867	7.206	2.496	0.0177	0.0177	-3.412	fam-a protein	NA
4152	PF3D7_1252300	Pf3D7_12_v3	2128400	-	387	0.827	0.152	1.502	7.585	2.495	0.0179	0.0179	-3.428	conserved Plasmodium protein, unknown function	NA
544	PF3D7_0310200	Pf3D7_03_v3	427290	+	13653	0.432	0.079	0.786	9.284	2.49	0.018	0.018	-3.53	phd finger protein, putative	NA
3443	PF3D7_1132800	Pf3D7_11_v3	1271204	+	777	1.086	0.198	1.975	3.018	2.486	0.0181	0.0181	-3.177	aquaglyceroporin	AQP
1338	PF3D7_0604500	Pf3D7_06_v3	189012	+	9067	0.537	0.098	0.976	11.812	2.486	0.0181	0.0181	-3.675	conserved Plasmodium protein, unknown function	NA
1784	PF3D7_0715300	Pf3D7_07_v3	684539	-	2153	1.319	0.238	2.4	-3.669	2.482	0.0183	0.0183	-3.139	calcium/calmodulin-dependent protein kinase, putative	NA
3078	PF3D7_1038000	Pf3D7_10_v3	1505835	+	1062	0.424	0.076	0.771	9.77	2.481	0.0183	0.0183	-3.571	antigen UB05	NA
3079	PF3D7_1038000	Pf3D7_10_v3	1505835	+	1062	0.424	0.076	0.771	9.77	2.481	0.0183	0.0183	-3.571	antigen UB05	NA
3937	PF3D7_1230900	Pf3D7_12_v3	1267368	+	2814	0.419	0.075	0.762	9.517	2.478	0.0184	0.0184	-3.573	serine/threonine protein kinase RIO1, putative	RIO1
3930	PF3D7_1230200	Pf3D7_12_v3	1245535	+	3636	1.143	0.204	2.082	2.68	2.476	0.0185	0.0185	-3.172	vacuolar transporter chaperone, putative, pseudogene	NA
5231	PF3D7_1430200	Pf3D7_14_v3	1188349	+	3118	0.741	0.132	1.351	3.478	2.474	0.0186	0.0186	-3.238	plasmepsin IX	NA
3924	PF3D7_1229700	Pf3D7_12_v3	1218181	+	586	1.421	0.251	2.59	-4.021	2.471	0.0188	0.0188	-3.167	conserved Plasmodium protein, unknown function	NA
488	PF3D7_0304600	Pf3D7_03_v3	221323	-	1194	1.173	0.209	2.137	6.241	2.484	0.0188	0.0188	-3.46	circumsporozoite (CS) protein	CSP
1479	PF3D7_0618300	Pf3D7_06_v3	768792	+	665	0.395	0.068	0.722	9.258	2.455	0.0195	0.0195	-3.594	60S ribosomal protein L27a, putative	NA
2830	PF3D7_1013800	Pf3D7_10_v3	542359	+	2421	1.542	0.263	2.82	0.585	2.455	0.0196	0.0196	-3.166	conserved Plasmodium protein, unknown function	NA
2056	PF3D7_0809300	Pf3D7_08_v3	474253	-	1033	1.943	0.33	3.556	-1.885	2.451	0.0197	0.0197	-3.165	unspecified product	NA
912	PF3D7_0421500	Pf3D7_04_v3	981823	-	1168	1.517	0.258	2.777	-2.212	2.451	0.0197	0.0197	-3.167	rifin, pseudogene	RIF
422	PF3D7_0221500	Pf3D7_02_v3	863079	-	764	1.494	0.252	2.736	-2.297	2.447	0.0199	0.0199	-3.171	Pfmc-2TM Maurer's cleft two transmembrane protein, pseudogene	NA
3855	PF3D7_1222800	Pf3D7_12_v3	920790	-	1627	1.366	0.23	2.503	-3.799	2.445	0.0199	0.0199	-3.204	conserved Plasmodium protein, unknown function	NA
1285	PF3D7_0532300	Pf3D7_05_v3	1308278	+	1663	0.936	0.159	1.714	9.618	2.46	0.0199	0.0199	-3.638	Plasmodium exported protein (PHISTb), unknown function	NA
863	PF3D7_0416600	Pf3D7_04_v3	726265	+	864	1.432	0.241	2.624	-0.427	2.444	0.02	0.02	-3.166	prohibitin-like protein, putative	NA
3172	PF3D7_1106200	Pf3D7_11_v3	260867	+	2465	1.205	0.202	2.208	-0.863	2.443	0.02	0.02	-3.169	conserved Plasmodium protein, unknown function	NA
3949	PF3D7_1232100	Pf3D7_12_v3	1328311	-	3061	0.664	0.111	1.217	4.176	2.444	0.02	0.02	-3.324	60 kDa chaperonin	CPN60
4570	PF3D7_1338200	Pf3D7_13_v3	1545070	-	666	0.306	0.051	0.56	10.472	2.443	0.02	0.02	-3.687	60S ribosomal protein L6-2, putative	NA
204	PF3D7_0200300	Pf3D7_02_v3	35927	-	1323	1.522	0.255	2.789	2.328	2.451	0.0201	0.0201	-3.25	erythrocyte membrane protein 1 (PfEMP1), exon 2	NA
5397	PF3D7_1446700	Pf3D7_14_v3	1919583	-	2063	1.144	0.191	2.097	0.885	2.442	0.0201	0.0201	-3.184	conserved Plasmodium protein, unknown function	NA
1286	PF3D7_0532400	Pf3D7_05_v3	1312471	+	1684	0.773	0.129	1.417	7.337	2.442	0.0202	0.0202	-3.537	lysine-rich membrane-associated PHISTb protein	LyMP
1963	PF3D7_0800200	Pf3D7_08_v3	29700	-	9334	1.561	0.256	2.866	3.106	2.441	0.0206	0.0206	-3.293	erythrocyte membrane protein 1, PfEMP1	VAR
809	PF3D7_0411300	Pf3D7_04_v3	510380	+	2169	1.269	0.207	2.331	0.303	2.43	0.0207	0.0207	-3.196	conserved Plasmodium protein, unknown function	NA
3335	PF3D7_1122200	Pf3D7_11_v3	842991	-	2557	0.486	0.079	0.894	7.055	2.428	0.0207	0.0207	-3.528	cupin-like protein, putative	NA
2486	PF3D7_0917900	Pf3D7_09_v3	737985	+	2292	0.393	0.064	0.722	11.445	2.429	0.0207	0.0207	-3.767	heat shock protein 70	HSP70-2
2130	PF3D7_0816600	Pf3D7_08_v3	762118	-	3213	0.779	0.126	1.432	5.087	2.427	0.0208	0.0208	-3.414	chaperone protein ClpB1	ClpB1
4885	PF3D7_1369700	Pf3D7_13_v3	2778005	-	1067	0.463	0.075	0.851	5.899	2.424	0.0209	0.0209	-3.464	U2 small nuclear ribonucleoprotein A', putative	NA
5414	PF3D7_1448400	Pf3D7_14_v3	1980319	-	2789	0.933	0.15	1.716	1.591	2.422	0.021	0.021	-3.229	ubiquitin-protein ligase, putative	HRD3
1733	PF3D7_0710200	Pf3D7_07_v3	463105	+	8733	0.962	0.154	1.77	7.349	2.428	0.0212	0.0212	-3.58	conserved Plasmodium protein, unknown function	NA
956	PF3D7_0425800	Pf3D7_04_v3	1156423	+	11399	1.448	0.231	2.664	4.428	2.431	0.0213	0.0213	-3.408	erythrocyte membrane protein 1, PfEMP1	VAR
4158	PF3D7_1252900	Pf3D7_12_v3	2162707	-	439	1.407	0.223	2.59	5.042	2.428	0.0214	0.0214	-3.428	Plasmodium exported protein, unknown function	NA
2246	PF3D7_0828200	Pf3D7_08_v3	1216271	+	4446	0.733	0.115	1.351	4.989	2.414	0.0215	0.0215	-3.427	leucine--tRNA ligase, putative	NA
217	PF3D7_0201600	Pf3D7_02_v3	77251	-	1558	0.564	0.088	1.041	8.375	2.41	0.0216	0.0216	-3.644	PHISTb domain-containing RESA-like protein 1	RLP1
5056	PF3D7_1413100	Pf3D7_14_v3	527132	+	2103	1.173	0.182	2.164	-3.877	2.406	0.0218	0.0218	-3.263	conserved Plasmodium protein, unknown function	NA
5159	PF3D7_1423200	Pf3D7_14_v3	933059	+	2299	0.619	0.096	1.142	6.592	2.406	0.0218	0.0218	-3.538	peptidyl-prolyl cis-trans isomerase	CYP52
3792	PF3D7_1216500	Pf3D7_12_v3	657339	-	666	1.789	0.276	3.302	-1.968	2.405	0.0219	0.0219	-3.237	male development gene 1	MDV1
2936	PF3D7_1023900	Pf3D7_10_v3	997475	-	9987	0.763	0.118	1.409	10.804	2.412	0.0219	0.0219	-3.796	chromodomain-helicase-DNA-binding protein 1 homolog, putative	CHD1
4571	PF3D7_1338300	Pf3D7_13_v3	1548692	+	1705	0.348	0.053	0.642	10.217	2.401	0.0221	0.0221	-3.759	elongation factor 1-gamma, putative	NA
227	PF3D7_0202600	Pf3D7_02_v3	129342	-	4222	0.637	0.096	1.179	4.905	2.392	0.0225	0.0225	-3.462	conserved Plasmodium protein, unknown function	NA
228	PF3D7_0202600	Pf3D7_02_v3	129342	-	4222	0.637	0.096	1.179	4.905	2.392	0.0225	0.0225	-3.462	conserved Plasmodium protein, unknown function	NA
290	PF3D7_0208700	Pf3D7_02_v3	356501	-	1514	0.606	0.09	1.121	5.716	2.39	0.0226	0.0226	-3.511	conserved Plasmodium protein, unknown function, unspecified product	NA
291	PF3D7_0208700	Pf3D7_02_v3	356501	-	1514	0.606	0.09	1.121	5.716	2.39	0.0226	0.0226	-3.511	conserved Plasmodium protein, unknown function, unspecified product	NA
993	PF3D7_0503400	Pf3D7_05_v3	140710	+	762	1.172	0.172	2.172	1.456	2.384	0.023	0.023	-3.297	actin-depolymerizing factor 1	ADF1
3683	PF3D7_1205800	Pf3D7_12_v3	256367	+	7365	0.38	0.056	0.705	9.586	2.384	0.023	0.023	-3.764	high mobility group protein B3, putative	HMGB3
874	PF3D7_0417700	Pf3D7_04_v3	784194	+	2237	1.338	0.195	2.482	-4.207	2.38	0.0232	0.0232	-3.307	conserved Plasmodium protein, unknown function	NA
4482	PF3D7_1329600	Pf3D7_13_v3	1258956	-	906	0.353	0.051	0.655	8.437	2.379	0.0232	0.0232	-3.711	conserved Plasmodium protein, unknown function	NA
2356	PF3D7_0905300	Pf3D7_09_v3	251353	-	18357	0.535	0.078	0.992	4.194	2.378	0.0233	0.0233	-3.461	dynein heavy chain, putative	NA
540	PF3D7_0309800	Pf3D7_03_v3	412089	+	1674	0.569	0.08	1.057	6.711	2.369	0.0238	0.0238	-3.631	YTH domain-containing protein, putative	NA
2394	PF3D7_0908700	Pf3D7_09_v3	401495	-	1900	0.498	0.07	0.925	3.353	2.369	0.0238	0.0238	-3.395	tRNA pseudouridine synthase, putative	NA
1785	PF3D7_0715400	Pf3D7_07_v3	687891	-	958	1.415	0.2	2.631	-3.631	2.368	0.0239	0.0239	-3.318	secreted ookinete protein, putative	PSOP20
5630	PF3D7_1469800	Pf3D7_14_v3	2865024	-	1222	0.999	0.139	1.858	2.146	2.363	0.0241	0.0241	-3.36	conserved Plasmodium protein, unknown function	NA
4261	PF3D7_1307800	Pf3D7_13_v3	348743	-	2046	0.588	0.081	1.095	7.003	2.361	0.0242	0.0242	-3.662	fork head domain protein, putative	NA
548	PF3D7_0310600	Pf3D7_03_v3	461175	-	853	0.493	0.068	0.918	7.002	2.36	0.0243	0.0243	-3.66	eukaryotic translation initiation factor 3 subunit K, putative, unspecified product	EIF3K
549	PF3D7_0310600	Pf3D7_03_v3	461175	-	853	0.493	0.068	0.918	7.002	2.36	0.0243	0.0243	-3.66	eukaryotic translation initiation factor 3 subunit K, putative, unspecified product	EIF3K
3754	PF3D7_1212700	Pf3D7_12_v3	558047	-	4134	0.548	0.075	1.021	12.003	2.357	0.0245	0.0245	-3.959	eukaryotic translation initiation factor 3 subunit A, putative	EIF3A
2612	PF3D7_0930200	Pf3D7_09_v3	1195693	-	2770	1.872	0.254	3.49	-1.935	2.354	0.0247	0.0247	-3.323	leucine-rich repeat protein	LRR8
114	PF3D7_0107100	Pf3D7_01_v3	295300	-	1632	0.978	0.132	1.824	-1.139	2.351	0.0248	0.0248	-3.324	conserved Plasmodium protein, unknown function	NA
3870	PF3D7_1224300	Pf3D7_12_v3	988628	+	2628	0.391	0.053	0.729	13.357	2.35	0.0249	0.0249	-4.022	polyadenylate-binding protein, putative	PABP
4044	PF3D7_1241600	Pf3D7_12_v3	1774901	+	1682	1.075	0.142	2.008	-0.172	2.344	0.0252	0.0252	-3.342	mitochondrial carrier protein, putative	NA
464	PF3D7_0302200	Pf3D7_03_v3	119458	+	5278	1.071	0.141	2.001	1.429	2.343	0.0252	0.0252	-3.382	cytoadherence linked asexual protein 3.2	CLAG3.2
1229	PF3D7_0526900	Pf3D7_05_v3	1123610	+	986	0.377	0.05	0.704	8.274	2.343	0.0253	0.0253	-3.775	transmembrane emp24 domain-containing protein, putative	NA
611	PF3D7_0316500	Pf3D7_03_v3	667006	+	1386	1.312	0.172	2.452	-0.271	2.341	0.0254	0.0254	-3.348	kinetochore protein NUF2, putative	NUF2
3061	PF3D7_1036400	Pf3D7_10_v3	1436316	+	3489	2.027	0.265	3.788	1.471	2.35	0.0256	0.0256	-3.38	liver stage antigen 1	LSA1
5104	PF3D7_1417900	Pf3D7_14_v3	757195	-	1361	1.304	0.169	2.44	-1.653	2.337	0.0256	0.0256	-3.349	conserved Plasmodium protein, unknown function	NA
2674	PF3D7_0936300	Pf3D7_09_v3	1436687	-	1295	0.401	0.052	0.75	11.469	2.338	0.0256	0.0256	-3.955	ring-exported protein 3	REX3
5710	PF3D7_1477900	Pf3D7_14_v3	3209129	+	2446	1.091	0.138	2.045	1.967	2.329	0.0261	0.0261	-3.433	acyl-CoA synthetase, pseudogene	ACS1b
3533	PF3D7_1141300	Pf3D7_11_v3	1659070	-	3290	1.21	0.152	2.268	-1.166	2.327	0.0262	0.0262	-3.364	conserved Plasmodium protein, unknown function	NA
3813	PF3D7_1218500	Pf3D7_12_v3	725841	-	3997	0.449	0.057	0.842	8.761	2.327	0.0262	0.0262	-3.845	conserved Plasmodium protein, unknown function	NA
4562	PF3D7_1337400	Pf3D7_13_v3	1506965	+	2013	0.392	0.049	0.735	8.206	2.327	0.0262	0.0262	-3.807	conserved Plasmodium protein, unknown function	NA
2203	PF3D7_0823900	Pf3D7_08_v3	1047551	+	957	0.819	0.102	1.535	3.364	2.324	0.0264	0.0264	-3.487	dicarboxylate/tricarboxylate carrier	DTC
3663	PF3D7_1203700	Pf3D7_12_v3	187146	-	1697	0.341	0.043	0.64	10.819	2.323	0.0264	0.0264	-3.956	nucleosome assembly protein	NAPL
2253	PF3D7_0828900	Pf3D7_08_v3	1241966	-	930	0.942	0.116	1.767	1.886	2.32	0.0266	0.0266	-3.432	conserved Plasmodium protein, unknown function	NA
2494	PF3D7_0918700	Pf3D7_09_v3	769452	+	2654	0.509	0.063	0.956	7.345	2.32	0.0266	0.0266	-3.779	conserved Plasmodium protein, unknown function	NA
580	PF3D7_0313700	Pf3D7_03_v3	555035	-	3650	1.503	0.185	2.821	-2.666	2.319	0.0267	0.0267	-3.384	conserved Plasmodium protein, unknown function, unspecified product	NA
581	PF3D7_0313700	Pf3D7_03_v3	555035	-	3650	1.503	0.185	2.821	-2.666	2.319	0.0267	0.0267	-3.384	conserved Plasmodium protein, unknown function, unspecified product	NA
2224	PF3D7_0826000	Pf3D7_08_v3	1109276	+	3519	0.765	0.093	1.437	2.814	2.315	0.0269	0.0269	-3.495	conserved Plasmodium protein, unknown function	NA
5400	PF3D7_1447000	Pf3D7_14_v3	1929931	+	1449	0.319	0.039	0.599	10.621	2.315	0.0269	0.0269	-3.957	40S ribosomal protein S5	NA
2365	PF3D7_0906000	Pf3D7_09_v3	298665	-	5515	0.785	0.095	1.475	3.323	2.314	0.027	0.027	-3.501	exoribonuclease II	RNaseII
661	PF3D7_0321500	Pf3D7_03_v3	896546	-	3225	0.922	0.109	1.734	0.394	2.306	0.0275	0.0275	-3.415	peptidase, putative	NA
1652	PF3D7_0702300	Pf3D7_07_v3	96761	+	1970	0.745	0.088	1.402	8.192	2.31	0.0275	0.0275	-3.85	sporozoite threonine and asparagine-rich protein	STARP
45	PF3D7_0100300	Pf3D7_01_v3	42367	-	4141	1.409	0.163	2.654	2.736	2.305	0.028	0.028	-3.525	erythrocyte membrane protein 1, PfEMP1	VAR
4531	PF3D7_1334300	Pf3D7_13_v3	1400897	-	1380	1.065	0.121	2.008	2.788	2.295	0.0282	0.0282	-3.525	MSP7-like protein	MSRP5
1890	PF3D7_0726100	Pf3D7_07_v3	1093566	-	2557	0.655	0.073	1.238	9.139	2.289	0.0287	0.0287	-3.934	Plasmodium exported protein, unknown function	NA
1003	PF3D7_0504500	Pf3D7_05_v3	174989	+	1445	1.456	0.159	2.752	-3.84	2.283	0.0289	0.0289	-3.448	conserved Plasmodium protein, unknown function	NA
4777	PF3D7_1358900	Pf3D7_13_v3	2332196	-	2720	0.515	0.056	0.974	7.449	2.283	0.0289	0.0289	-3.843	GTP-binding protein, putative	NA
608	PF3D7_0316300	Pf3D7_03_v3	658272	+	3372	1.306	0.143	2.469	3.279	2.289	0.029	0.029	-3.581	inorganic pyrophosphatase, putative	NA
609	PF3D7_0316300	Pf3D7_03_v3	658272	+	3372	1.306	0.143	2.469	3.279	2.289	0.029	0.029	-3.581	inorganic pyrophosphatase, putative	NA
5363	PF3D7_1443300	Pf3D7_14_v3	1776010	+	653	0.56	0.06	1.06	6.82	2.279	0.0292	0.0292	-3.807	U6 snRNA-associated Sm-like protein LSm5, putative	LSM5
582	PF3D7_0313800	Pf3D7_03_v3	559334	+	2920	1.847	0.198	3.497	-1.2	2.28	0.0293	0.0293	-3.443	conserved Plasmodium protein, unknown function	NA
1980	PF3D7_0801700	Pf3D7_08_v3	112299	+	5579	0.573	0.061	1.085	7.263	2.278	0.0293	0.0293	-3.846	sentrin-specific protease 2, putative	SENP2
2940	PF3D7_1024300	Pf3D7_10_v3	1022505	+	393	1.39	0.148	2.632	-2.197	2.276	0.0294	0.0294	-3.446	conserved Plasmodium protein, unknown function	NA
1074	PF3D7_0511600	Pf3D7_05_v3	517259	-	627	0.682	0.073	1.292	3.833	2.277	0.0294	0.0294	-3.606	apical rhoptry neck protein	ARNP
5092	PF3D7_1416700	Pf3D7_14_v3	681055	-	969	1.638	0.171	3.106	-3.208	2.271	0.0297	0.0297	-3.463	conserved Plasmodium protein, unknown function	NA
4720	PF3D7_1353100	Pf3D7_13_v3	2124272	-	999	0.588	0.061	1.114	9.332	2.269	0.0298	0.0298	-3.973	Plasmodium exported protein, unknown function	NA
155	PF3D7_0111200	Pf3D7_01_v3	430152	-	707	1.397	0.144	2.649	-4.002	2.268	0.0299	0.0299	-3.471	conserved Plasmodium protein, unknown function	NA
302	PF3D7_0209800	Pf3D7_02_v3	404281	-	2075	0.254	0.026	0.482	10.458	2.263	0.0303	0.0303	-4.051	ATP-dependent RNA helicase UAP56	UAP56
78	PF3D7_0103600	Pf3D7_01_v3	161131	+	5099	0.755	0.075	1.435	4.325	2.258	0.0306	0.0306	-3.677	ATP-dependent RNA helicase, putative	NA
2678	PF3D7_0936700	Pf3D7_09_v3	1454422	+	1299	0.615	0.06	1.17	5.89	2.254	0.0309	0.0309	-3.808	lysophospholipase, putative	NA
3268	PF3D7_1115700	Pf3D7_11_v3	592130	-	1455	0.501	0.049	0.953	8.147	2.254	0.0309	0.0309	-3.935	cysteine proteinase falcipain 2a	FP2A
1441	PF3D7_0614500	Pf3D7_06_v3	606142	-	1118	0.369	0.036	0.702	9.804	2.252	0.031	0.031	-4.032	60S ribosomal protein L19	RPL19
5214	PF3D7_1428600	Pf3D7_14_v3	1127042	+	1990	0.914	0.088	1.741	1.075	2.251	0.0311	0.0311	-3.525	peptide chain release factor 1	RF1
4584	PF3D7_1339600	Pf3D7_13_v3	1588404	+	1887	0.696	0.067	1.324	3.467	2.252	0.0311	0.0311	-3.622	conserved Plasmodium protein, unknown function	NA
2661	PF3D7_0935000	Pf3D7_09_v3	1366569	-	582	0.434	0.041	0.827	7.181	2.248	0.0313	0.0313	-3.893	U2 small nuclear ribonucleoprotein B'', putative	NA
2104	PF3D7_0813900	Pf3D7_08_v3	677989	-	737	0.342	0.032	0.651	10.111	2.246	0.0314	0.0314	-4.06	40S ribosomal protein S16, putative	NA
2963	PF3D7_1026600	Pf3D7_10_v3	1113495	-	5079	0.865	0.082	1.649	7.034	2.252	0.0315	0.0315	-3.915	conserved Plasmodium protein, unknown function	NA
5705	PF3D7_1477400	Pf3D7_14_v3	3183248	+	1105	1.359	0.127	2.59	1.141	2.246	0.0316	0.0316	-3.55	Plasmodium exported protein (PHIST), unknown function	NA
94	PF3D7_0105200	Pf3D7_01_v3	222254	-	1707	0.949	0.089	1.809	1.461	2.245	0.0316	0.0316	-3.549	RAP protein, putative	NA
4012	PF3D7_1238400	Pf3D7_12_v3	1592402	-	1231	0.913	0.085	1.74	-0.264	2.244	0.0316	0.0316	-3.51	conserved Plasmodium protein, unknown function	NA
1392	PF3D7_0609800	Pf3D7_06_v3	421157	-	1466	0.569	0.053	1.085	4.093	2.244	0.0316	0.0316	-3.714	palmitoyltransferase DHHC2, putative	DHHC2
4411	PF3D7_1322500	Pf3D7_13_v3	953154	+	2636	1.389	0.128	2.649	-1.508	2.24	0.0319	0.0319	-3.502	palmitoyltransferase DHHC5	DHHC5
4025	PF3D7_1239700	Pf3D7_12_v3	1655487	+	2643	0.703	0.065	1.341	3.16	2.24	0.0319	0.0319	-3.647	ATP-dependent zinc metalloprotease FTSH 1	FTSH1
128	PF3D7_0108500	Pf3D7_01_v3	349170	+	540	0.527	0.048	1.007	10.747	2.236	0.0321	0.0321	-4.127	conserved Plasmodium protein, unknown function	NA
2107	PF3D7_0814200	Pf3D7_08_v3	687340	+	747	0.628	0.057	1.199	12.419	2.242	0.0322	0.0322	-4.213	DNA/RNA-binding protein Alba 1	ALBA1
3182	PF3D7_1107200	Pf3D7_11_v3	297823	+	2912	0.611	0.055	1.167	5.027	2.236	0.0322	0.0322	-3.763	conserved Plasmodium protein, unknown function	NA
278	PF3D7_0207500	Pf3D7_02_v3	298897	-	3668	1.596	0.143	3.048	-2.346	2.234	0.0323	0.0323	-3.511	serine repeat antigen 6	SERA6
3302	PF3D7_1118900	Pf3D7_11_v3	716795	+	1618	0.72	0.065	1.376	0.795	2.234	0.0323	0.0323	-3.539	conserved Plasmodium protein, unknown function	NA
5647	PF3D7_1471500	Pf3D7_14_v3	2922351	-	2207	1.225	0.106	2.343	-2.686	2.227	0.0328	0.0328	-3.523	conserved protein, unknown function	NA
4306	PF3D7_1312200	Pf3D7_13_v3	518107	+	1261	1.548	0.133	2.964	-2.956	2.225	0.033	0.033	-3.529	conserved Plasmodium protein, unknown function	NA
2780	PF3D7_1008900	Pf3D7_10_v3	369199	-	1027	0.391	0.034	0.749	7.274	2.224	0.033	0.033	-3.94	adenylate kinase	AK1
1973	PF3D7_0801000	Pf3D7_08_v3	84568	-	3855	0.533	0.045	1.021	10.119	2.222	0.0332	0.0332	-4.125	Plasmodium exported protein (PHISTc), unknown function	NA
188	PF3D7_0114600	Pf3D7_01_v3	560474	-	1061	1.482	0.123	2.84	-0.946	2.218	0.0334	0.0334	-3.542	stevor, pseudogene	NA
5442	PF3D7_1451200	Pf3D7_14_v3	2094340	-	5397	0.389	0.032	0.745	10.799	2.218	0.0335	0.0335	-4.164	conserved Plasmodium protein, unknown function	NA
2318	PF3D7_0901600	Pf3D7_09_v3	77861	+	1014	1.607	0.132	3.082	-3.391	2.215	0.0337	0.0337	-3.546	stevor	NA
3127	PF3D7_1101700	Pf3D7_11_v3	85629	+	790	1.498	0.121	2.874	-1.209	2.213	0.0339	0.0339	-3.545	Pfmc-2TM Maurer's cleft two transmembrane protein	MC-2TM
5650	PF3D7_1471800	Pf3D7_14_v3	2932023	+	765	0.733	0.059	1.407	1.519	2.211	0.034	0.034	-3.592	conserved Plasmodium protein, unknown function	NA
3137	PF3D7_1102800	Pf3D7_11_v3	131703	-	285	0.525	0.042	1.008	12.917	2.213	0.034	0.034	-4.278	early transcribed membrane protein 11.2	ETRAMP11.2
4872	PF3D7_1368400	Pf3D7_13_v3	2719490	-	1931	0.416	0.033	0.798	6.686	2.211	0.034	0.034	-3.936	conserved Plasmodium protein, unknown function	NA
4979	PF3D7_1405800	Pf3D7_14_v3	200493	-	3651	0.368	0.029	0.706	10.171	2.211	0.034	0.034	-4.143	ribosome biogenesis protein BOP1, putative	BOP1
2737	PF3D7_1004600	Pf3D7_10_v3	215717	+	4043	1.135	0.091	2.18	1.536	2.21	0.0341	0.0341	-3.617	conserved Plasmodium membrane protein, unknown function	NA
1934	PF3D7_0730400	Pf3D7_07_v3	1304347	+	750	0.829	0.065	1.592	1.371	2.207	0.0343	0.0343	-3.616	conserved Plasmodium protein, unknown function	NA
1495	PF3D7_0619700	Pf3D7_06_v3	828199	-	2191	0.788	0.061	1.515	0.805	2.206	0.0344	0.0344	-3.589	conserved Plasmodium protein, unknown function	NA
736	PF3D7_0404000	Pf3D7_04_v3	223711	-	421	1.061	0.082	2.041	-1.341	2.203	0.0346	0.0346	-3.56	conserved Plasmodium protein, unknown function	NA
4585	PF3D7_1339700	Pf3D7_13_v3	1590510	-	5811	0.642	0.049	1.235	3.347	2.202	0.0347	0.0347	-3.73	conserved Plasmodium protein, unknown function	NA
5355	PF3D7_1442500	Pf3D7_14_v3	1724402	-	3012	0.626	0.047	1.205	3.48	2.2	0.0349	0.0349	-3.713	geranylgeranyl transferase type-2 subunit alpha, putative	NA
1810	PF3D7_0717900	Pf3D7_07_v3	772951	-	2314	0.787	0.059	1.514	3.806	2.198	0.035	0.035	-3.734	thioredoxin-like protein	NA
2098	PF3D7_0813300	Pf3D7_08_v3	656078	+	1553	0.282	0.021	0.544	10.314	2.198	0.035	0.035	-4.17	conserved Plasmodium protein, unknown function	NA
4858	PF3D7_1367000	Pf3D7_13_v3	2679415	-	1011	0.59	0.043	1.137	5.362	2.194	0.0353	0.0353	-3.861	suppressor of kinetochore protein 1, putative	SKP1
1381	PF3D7_0608700	Pf3D7_06_v3	358391	+	1813	0.315	0.023	0.608	9.301	2.194	0.0353	0.0353	-4.12	T-complex protein 1 subunit zeta	CCT6
5501	PF3D7_1457000	Pf3D7_14_v3	2336649	-	2505	0.45	0.033	0.867	8.332	2.193	0.0354	0.0354	-4.064	signal peptide peptidase	SPP
2800	PF3D7_1010900	Pf3D7_10_v3	426601	+	1546	0.678	0.049	1.307	4.147	2.192	0.0355	0.0355	-3.767	conserved Plasmodium protein, unknown function	NA
769	PF3D7_0407400	Pf3D7_04_v3	367845	-	309	0.701	0.049	1.353	2.244	2.185	0.036	0.036	-3.668	conserved Plasmodium protein, unknown function	NA
5385	PF3D7_1445500	Pf3D7_14_v3	1867616	+	450	0.524	0.036	1.012	5.863	2.185	0.036	0.036	-3.928	conserved Plasmodium protein, unknown function	NA
579	PF3D7_0313600	Pf3D7_03_v3	552001	-	2621	1.011	0.07	1.952	-1.172	2.184	0.0361	0.0361	-3.597	conserved Plasmodium protein, unknown function	NA
642	PF3D7_0319600	Pf3D7_03_v3	817913	+	783	0.442	0.03	0.855	8.268	2.182	0.0363	0.0363	-4.077	elongation factor 1 (EF-1), putative	NA
1786	PF3D7_0715500	Pf3D7_07_v3	689543	-	515	1.173	0.079	2.267	-3.906	2.18	0.0364	0.0364	-3.599	mitochondrial ATP synthase F1, epsilon subunit, putative	NA
86	PF3D7_0104400	Pf3D7_01_v3	202536	+	1608	0.544	0.037	1.052	4.411	2.18	0.0364	0.0364	-3.849	4-hydroxy-3-methylbut-2-enyl diphosphate reductase	LytB
1789	PF3D7_0715800	Pf3D7_07_v3	695600	-	1305	1.264	0.084	2.445	0.125	2.178	0.0365	0.0365	-3.624	drug/metabolite transporter, putative	DMT1
2225	PF3D7_0826100	Pf3D7_08_v3	1113369	-	25776	0.406	0.027	0.785	9.933	2.179	0.0365	0.0365	-4.187	E3 ubiquitin-protein ligase, putative	NA
2057	PF3D7_0809400	Pf3D7_08_v3	475573	+	2553	1.113	0.072	2.154	0.794	2.174	0.0369	0.0369	-3.646	conserved Plasmodium protein, unknown function	NA
2794	PF3D7_1010300	Pf3D7_10_v3	414732	+	597	0.518	0.034	1.003	8.217	2.175	0.0369	0.0369	-4.105	succinate dehydrogenase subunit 4, putative	SDH4
434	PF3D7_0222600	Pf3D7_02_v3	892856	+	1351	1.507	0.096	2.919	-0.692	2.172	0.0371	0.0371	-3.615	rifin	RIF
1568	PF3D7_0626800	Pf3D7_06_v3	1078995	+	2326	0.436	0.028	0.845	11.628	2.171	0.0372	0.0372	-4.287	pyruvate kinase	PyrK
3138	PF3D7_1102900	Pf3D7_11_v3	136661	+	782	0.77	0.048	1.493	4.764	2.168	0.0374	0.0374	-3.858	Plasmodium exported protein (hyp11), unknown function	NA
5087	PF3D7_1416200	Pf3D7_14_v3	650503	-	6843	0.797	0.049	1.544	4.065	2.167	0.0375	0.0375	-3.845	metacaspase-like protein	MCA3
5364	PF3D7_1443400	Pf3D7_14_v3	1776958	-	2649	0.666	0.04	1.293	2.878	2.163	0.0378	0.0378	-3.751	WD repeat-containing protein	WLP1
972	PF3D7_0501300	Pf3D7_05_v3	68930	+	1184	0.456	0.027	0.885	12.251	2.162	0.0379	0.0379	-4.338	skeleton-binding protein 1	SBP1
432	PF3D7_0222400	Pf3D7_02_v3	886625	+	1178	1.5	0.088	2.912	-1.137	2.161	0.038	0.038	-3.638	rifin, pseudogene	RIF
2881	PF3D7_1018500	Pf3D7_10_v3	735921	-	893	0.453	0.026	0.88	6.773	2.159	0.0382	0.0382	-4.04	PHF5-like protein, putative	NA
4518	PF3D7_1333000	Pf3D7_13_v3	1355285	+	1910	0.445	0.026	0.864	5.673	2.158	0.0382	0.0382	-3.962	20 kDa chaperonin	CPN20
455	PF3D7_0301300	Pf3D7_03_v3	82011	-	1505	0.503	0.029	0.976	6.804	2.157	0.0383	0.0383	-4.034	alpha/beta hydrolase, putative	NA
2714	PF3D7_1002400	Pf3D7_10_v3	121115	+	2177	0.342	0.019	0.664	10.066	2.156	0.0384	0.0384	-4.239	RNA-binding protein, putative	NA
2715	PF3D7_1002400	Pf3D7_10_v3	121115	+	2177	0.342	0.019	0.664	10.066	2.156	0.0384	0.0384	-4.239	RNA-binding protein, putative	NA
4178	PF3D7_1254900	Pf3D7_12_v3	2232691	+	213	1.07	0.059	2.082	-4.131	2.153	0.0387	0.0387	-3.64	Plasmodium exported protein, unknown function, fragment	NA
4574	PF3D7_1338600	Pf3D7_13_v3	1556659	-	3076	0.91	0.05	1.77	-0.747	2.152	0.0387	0.0387	-3.652	conserved Plasmodium protein, unknown function	NA
5542	PF3D7_1461000	Pf3D7_14_v3	2482775	+	2312	1.511	0.079	2.943	-1.808	2.146	0.0393	0.0393	-3.649	conserved Plasmodium protein, unknown function	NA
5731	PF3D7_1480000	Pf3D7_14_v3	3285900	+	1104	1.326	0.068	2.583	0.683	2.144	0.0394	0.0394	-3.695	rifin	RIF
1444	PF3D7_0614800	Pf3D7_06_v3	615297	-	1314	1.29	0.062	2.517	1.395	2.138	0.04	0.04	-3.724	endonuclease III homologue, putative	NA
4550	PF3D7_1336200	Pf3D7_13_v3	1474274	+	1388	0.912	0.044	1.78	3.191	2.136	0.0401	0.0401	-3.821	conserved Plasmodium protein, unknown function	NA
1073	PF3D7_0511500	Pf3D7_05_v3	486602	+	30186	0.497	0.024	0.971	10.172	2.136	0.0401	0.0401	-4.277	RNA pseudouridylate synthase, putative	NA
1846	PF3D7_0721600	Pf3D7_07_v3	931459	-	706	0.361	0.017	0.705	10.37	2.134	0.0403	0.0403	-4.291	40S ribosomal protein S5, putative	NA
3402	PF3D7_1128900	Pf3D7_11_v3	1118249	+	2437	0.891	0.041	1.742	-0.377	2.131	0.0406	0.0406	-3.703	conserved Plasmodium protein, unknown function	NA
727	PF3D7_0403100	Pf3D7_04_v3	175372	-	1881	0.724	0.033	1.415	3.143	2.131	0.0406	0.0406	-3.818	regulator of chromosome condensation, putative	NA
223	PF3D7_0202200	Pf3D7_02_v3	112547	-	1136	0.366	0.015	0.717	9.411	2.119	0.0416	0.0416	-4.27	EMP1-trafficking protein	PTP1
2017	PF3D7_0805400	Pf3D7_08_v3	303370	-	1227	0.559	0.021	1.096	5.263	2.112	0.0422	0.0422	-4.013	acetyltransferase, putative	NA
3065	PF3D7_1036700	Pf3D7_10_v3	1445916	-	1580	0.796	0.029	1.564	2.25	2.111	0.0424	0.0424	-3.808	phosducin-like protein, putative	PhLP2
1664	PF3D7_0703500	Pf3D7_07_v3	135606	+	6900	0.477	0.016	0.938	10.286	2.105	0.0429	0.0429	-4.352	erythrocyte membrane-associated antigen	NA
5378	PF3D7_1444800	Pf3D7_14_v3	1844041	-	1577	0.44	0.013	0.867	10.505	2.098	0.0436	0.0436	-4.373	fructose-bisphosphate aldolase	FBPA
1692	PF3D7_0706300	Pf3D7_07_v3	305563	+	470	0.517	0.014	1.019	5.826	2.091	0.0442	0.0442	-4.109	conserved Plasmodium protein, unknown function	NA
4308	PF3D7_1312400	Pf3D7_13_v3	521050	+	3387	1.12	0.029	2.211	-1.828	2.088	0.0445	0.0445	-3.733	translation initiation factor IF-2, putative	IF2a
5495	PF3D7_1456400	Pf3D7_14_v3	2309181	-	3292	1.492	0.036	2.948	-1.909	2.085	0.0449	0.0449	-3.738	conserved Plasmodium protein, unknown function	NA
2060	PF3D7_0809700	Pf3D7_08_v3	499463	-	2107	1.34	0.032	2.648	-2.634	2.083	0.045	0.045	-3.739	RuvB-like helicase 1	RUVB1
3383	PF3D7_1127000	Pf3D7_11_v3	1056198	-	1857	1.755	0.04	3.47	7.979	2.1	0.0452	0.0452	-4.241	protein phosphatase, putative	NA
4209	PF3D7_1302800	Pf3D7_13_v3	150783	-	853	0.329	0.006	0.652	9.713	2.074	0.0459	0.0459	-4.36	40S ribosomal protein S7, putative	NA
4710	PF3D7_1352100	Pf3D7_13_v3	2076078	-	3150	0.571	0.01	1.131	5.486	2.069	0.0464	0.0464	-4.106	ABC transporter B family member 6, putative	ABCB6
4444	PF3D7_1325800	Pf3D7_13_v3	1071146	+	4602	0.872	0.014	1.729	1.903	2.068	0.0465	0.0465	-3.865	conserved Plasmodium protein, unknown function	NA
753	PF3D7_0405700	Pf3D7_04_v3	305746	-	7248	1.314	0.021	2.606	2.524	2.073	0.0466	0.0466	-3.918	lysine decarboxylase, putative	NA
2250	PF3D7_0828600	Pf3D7_08_v3	1229899	-	2234	1.088	0.017	2.158	-3.24	2.066	0.0467	0.0467	-3.76	folate transporter 1	FT1
825	PF3D7_0412900	Pf3D7_04_v3	576810	-	7859	0.796	0.012	1.581	3.624	2.066	0.0467	0.0467	-3.988	erythrocyte membrane protein 1, PfEMP1	VAR
3637	PF3D7_1201200	Pf3D7_12_v3	89934	+	816	0.366	0.005	0.727	9.22	2.06	0.0473	0.0473	-4.374	Plasmodium exported protein (PHISTa-like), unknown function	NA
1079	PF3D7_0512100	Pf3D7_05_v3	528846	-	564	0.748	0.009	1.487	1.696	2.059	0.0474	0.0474	-3.869	conserved Plasmodium protein, unknown function	NA
5387	PF3D7_1445700	Pf3D7_14_v3	1875421	-	1454	0.292	0.003	0.581	9.279	2.058	0.0475	0.0475	-4.374	conserved Plasmodium protein, unknown function	NA
1520	PF3D7_0622100	Pf3D7_06_v3	898341	-	4023	0.495	0.005	0.984	4.897	2.056	0.0476	0.0476	-4.084	conserved Plasmodium protein, unknown function	NA
651	PF3D7_0320500	Pf3D7_03_v3	860813	+	1290	1.345	0.014	2.676	3.169	2.063	0.0478	0.0478	-3.979	nicotinamidase, putative	Nico
2385	PF3D7_0907900	Pf3D7_09_v3	367865	-	925	0.702	0.007	1.397	3.536	2.055	0.0478	0.0478	-3.996	peptide deformylase	PDF
5094	PF3D7_1416900	Pf3D7_14_v3	685437	-	932	0.744	0.007	1.48	2.413	2.054	0.0479	0.0479	-3.896	prefoldin subunit 2, putative	NA
284	PF3D7_0208100	Pf3D7_02_v3	327932	+	7272	0.505	0.005	1.005	2.638	2.053	0.0479	0.0479	-3.914	conserved Plasmodium protein, unknown function	NA
4711	PF3D7_1352200	Pf3D7_13_v3	2080764	+	2389	0.398	0.004	0.792	8.231	2.053	0.0479	0.0479	-4.328	U3 small nucleolar RNA-associated protein 15, putative	UTP15
653	PF3D7_0320700	Pf3D7_03_v3	865014	+	1407	1.146	0.01	2.282	0.304	2.052	0.048	0.048	-3.834	signal peptidase complex subunit SPC2, putative	SPC2
3631	PF3D7_1200600	Pf3D7_12_v3	46788	-	10018	0.978	0.008	1.947	5.202	2.058	0.0481	0.0481	-4.166	erythrocyte membrane protein 1, PfEMP1	VAR2CSA
3091	PF3D7_1039200	Pf3D7_10_v3	1576441	-	551	1.378	0.009	2.748	-1.609	2.047	0.0487	0.0487	-3.792	Plasmodium exported protein, unknown function, pseudogene	NA
2519	PF3D7_0921100	Pf3D7_09_v3	861392	+	1393	1.057	0.006	2.108	0.981	2.046	0.0487	0.0487	-3.845	conserved Plasmodium protein, unknown function	NA
2310	PF3D7_0900800	Pf3D7_09_v3	52648	-	1373	1.492	0.008	2.976	0.805	2.05	0.0488	0.0488	-3.872	erythrocyte membrane protein 1 (PfEMP1), exon 2, pseudogene	VAR
5180	PF3D7_1425300	Pf3D7_14_v3	985365	-	2391	1.451	0.004	2.898	-1.051	2.039	0.0494	0.0494	-3.816	conserved Plasmodium protein, unknown function	NA
5108	PF3D7_1418300	Pf3D7_14_v3	776672	+	411	0.712	0.002	1.422	2.343	2.038	0.0495	0.0495	-3.937	calmodulin, putative	NA

## Sheet: significant_down
	GeneID	Chr	Start	Strand	Length	logFC	CI.L	CI.R	AveExpr	t	P.Value	adj.P.Val	B	[Product Description]	[Gene Name or Symbol]
1438	PF3D7_0614200	Pf3D7_06_v3	593172	-	2733	-1.191	-1.738	-0.643	4.459	-4.424	9.77e-05	9.77e-05	1.287	cytosolic Fe-S cluster assembly factor NAR1, putative	NAR1
924	PF3D7_0422700	Pf3D7_04_v3	1040470	+	1173	-0.834	-1.217	-0.45	6.546	-4.419	9.94e-05	9.94e-05	1.324	eukaryotic initiation factor 4A-III, putative	EIF4A3
3881	PF3D7_1225400	Pf3D7_12_v3	1031825	-	741	-0.953	-1.424	-0.481	5.422	-4.107	0.000245	0.000245	0.514	conserved Plasmodium protein, unknown function	NA
3823	PF3D7_1219500	Pf3D7_12_v3	784018	+	813	-3.766	-5.774	-1.759	-0.979	-3.827	0.000592	0.000592	-0.566	erythrocyte membrane protein 1 (PfEMP1), exon 2, pseudogene	VAR
5291	PF3D7_1436100	Pf3D7_14_v3	1461388	+	6203	-1.005	-1.549	-0.462	5.993	-3.761	0.000652	0.000652	-0.372	conserved Plasmodium membrane protein, unknown function	NA
5125	PF3D7_1419900	Pf3D7_14_v3	825612	-	1719	-0.829	-1.277	-0.38	5.763	-3.758	0.000657	0.000657	-0.376	YTH domain-containing protein, putative	NA
3566	PF3D7_1144600	Pf3D7_11_v3	1770949	+	954	-0.635	-1.001	-0.269	6.832	-3.532	0.00123	0.00123	-0.98	transcription initiation factor IIF subunit beta, putative	TFG2
148	PF3D7_0110400	Pf3D7_01_v3	393875	-	961	-0.802	-1.274	-0.33	6.574	-3.458	0.00151	0.00151	-1.153	DNA-directed RNA polymerase II subunit RPB9, putative	RPB9
2624	PF3D7_0931300	Pf3D7_09_v3	1261027	+	918	-2.069	-3.282	-0.855	2.808	-3.475	0.00152	0.00152	-1.079	asparagine-rich antigen, putative	NA
4811	PF3D7_1362300	Pf3D7_13_v3	2493143	+	570	-0.716	-1.139	-0.293	4.765	-3.44	0.00158	0.00158	-1.131	conserved protein, unknown function	NA
5569	PF3D7_1463700	Pf3D7_14_v3	2581543	+	981	-0.712	-1.143	-0.28	4.677	-3.355	0.00199	0.00199	-1.33	cyclin homologue	CYC1
3865	PF3D7_1223800	Pf3D7_12_v3	971268	+	927	-1.165	-1.872	-0.458	5.531	-3.35	0.00202	0.00202	-1.361	citrate/oxoglutarate carrier protein, putative	YHM2
2538	PF3D7_0923000	Pf3D7_09_v3	939580	-	1008	-0.606	-0.975	-0.237	6.224	-3.34	0.00207	0.00207	-1.424	DNA-directed RNA polymerase II subunit RPB3, putative	RPB3
1044	PF3D7_0508600	Pf3D7_05_v3	356222	+	789	-0.829	-1.337	-0.32	5.961	-3.314	0.00222	0.00222	-1.466	conserved Plasmodium protein, unknown function	NA
4251	PF3D7_1306800	Pf3D7_13_v3	320815	-	1203	-0.633	-1.025	-0.24	5.814	-3.275	0.00247	0.00247	-1.557	RED-like protein, putative	NA
4455	PF3D7_1326900	Pf3D7_13_v3	1129363	-	3684	-1.466	-2.379	-0.554	4.128	-3.268	0.00252	0.00252	-1.525	conserved Plasmodium membrane protein, unknown function	NA
2876	PF3D7_1018000	Pf3D7_10_v3	718454	+	1683	-0.853	-1.385	-0.321	4.347	-3.259	0.00258	0.00258	-1.547	tRNA pseudouridine synthase, putative	NA
4413	PF3D7_1322700	Pf3D7_13_v3	958219	-	957	-1.543	-2.51	-0.575	-3.08	-3.242	0.0027	0.0027	-1.826	conserved Plasmodium protein, unknown function	NA
2155	PF3D7_0819100	Pf3D7_08_v3	869562	+	1013	-0.62	-1.009	-0.231	6.18	-3.239	0.00271	0.00271	-1.658	BRIX domain, putative	NA
1321	PF3D7_0602800	Pf3D7_06_v3	116084	+	1941	-0.688	-1.121	-0.255	5.397	-3.234	0.00276	0.00276	-1.647	JmjC domain containing protein	JmjC2
4207	PF3D7_1302600	Pf3D7_13_v3	142860	-	1236	-0.606	-0.988	-0.224	6.341	-3.227	0.0028	0.0028	-1.697	deoxyhypusine hydroxylase	DOHH
3544	PF3D7_1142400	Pf3D7_11_v3	1702089	-	1554	-0.514	-0.842	-0.187	7.136	-3.197	0.00304	0.00304	-1.808	coproporphyrinogen-III oxidase	CPO
2028	PF3D7_0806500	Pf3D7_08_v3	345427	-	2028	-0.693	-1.136	-0.251	6.989	-3.188	0.00311	0.00311	-1.819	DnaJ protein, putative	NA
2781	PF3D7_1009000	Pf3D7_10_v3	371293	+	825	-0.507	-0.833	-0.181	6.268	-3.16	0.00335	0.00335	-1.851	diphthine methyl ester synthase, putative	DPH5
1524	PF3D7_0622500	Pf3D7_06_v3	912406	-	1305	-0.83	-1.365	-0.295	4.646	-3.155	0.00339	0.00339	-1.792	RNA methyltransferase, putative	NA
747	PF3D7_0405100	Pf3D7_04_v3	272255	-	4570	-0.633	-1.044	-0.222	7.546	-3.13	0.00362	0.00362	-1.989	protein transport protein Sec24B	SEC24B
2485	PF3D7_0917800	Pf3D7_09_v3	734629	+	1314	-0.989	-1.632	-0.345	2.719	-3.126	0.00366	0.00366	-1.831	conserved Plasmodium protein, unknown function	NA
3227	PF3D7_1111700	Pf3D7_11_v3	452459	-	2403	-0.703	-1.161	-0.245	5.426	-3.122	0.0037	0.0037	-1.9	conserved Plasmodium protein, unknown function	NA
2055	PF3D7_0809200	Pf3D7_08_v3	467943	-	3951	-0.691	-1.142	-0.24	6.128	-3.117	0.00375	0.00375	-1.942	asparagine-rich antigen Pfa55-14	pfa55-14
1176	PF3D7_0521700	Pf3D7_05_v3	882376	+	2526	-0.76	-1.257	-0.264	4.78	-3.116	0.00376	0.00376	-1.885	ATP-dependent RNA helicase DDX1, putative	DDX1
1881	PF3D7_0725100	Pf3D7_07_v3	1065252	+	4989	-0.664	-1.098	-0.23	6.798	-3.11	0.00382	0.00382	-2.002	conserved Plasmodium membrane protein, unknown function	NA
775	PF3D7_0408000	Pf3D7_04_v3	394065	-	516	-1.217	-2.016	-0.418	1.586	-3.099	0.00393	0.00393	-1.908	conserved Plasmodium protein, unknown function	NA
3580	PF3D7_1146000	Pf3D7_11_v3	1821032	-	1938	-0.654	-1.085	-0.223	7.323	-3.087	0.00406	0.00406	-2.085	ribosome assembly protein 4, putative	RSA4
1950	PF3D7_0731900	Pf3D7_07_v3	1382410	+	1115	-1.495	-2.481	-0.509	0.096	-3.084	0.00408	0.00408	-1.959	rifin, pseudogene	RIF
3247	PF3D7_1113700	Pf3D7_11_v3	529493	+	1071	-0.548	-0.909	-0.186	5.774	-3.079	0.00414	0.00414	-2.011	glyoxalase I	GloI
4218	PF3D7_1303600	Pf3D7_13_v3	178783	+	571	-0.943	-1.57	-0.316	2.427	-3.061	0.00434	0.00434	-1.972	conserved Plasmodium protein, unknown function	NA
4070	PF3D7_1244200	Pf3D7_12_v3	1852844	-	2838	-0.654	-1.091	-0.217	6.824	-3.044	0.00453	0.00453	-2.153	RNA polymerase II transcription factor B subunit 2, putative	TFB2
3396	PF3D7_1128200	Pf3D7_11_v3	1097117	+	411	-0.645	-1.078	-0.213	6.315	-3.036	0.00463	0.00463	-2.144	multiprotein-bridging factor 1, putative	MBF1
5284	PF3D7_1435500	Pf3D7_14_v3	1436280	+	765	-0.581	-0.97	-0.191	6.047	-3.032	0.00468	0.00468	-2.139	conserved Plasmodium protein, unknown function	NA
2992	PF3D7_1029400	Pf3D7_10_v3	1200894	-	1506	-0.57	-0.953	-0.187	5.896	-3.03	0.00471	0.00471	-2.136	LEM3/CDC50 family protein, putative	NA
933	PF3D7_0423600	Pf3D7_04_v3	1061790	-	4839	-0.471	-0.789	-0.154	8.74	-3.019	0.00483	0.00483	-2.316	conserved Plasmodium protein, unknown function	NA
2879	PF3D7_1018300	Pf3D7_10_v3	729809	-	3048	-0.545	-0.912	-0.178	8.067	-3.017	0.00486	0.00486	-2.285	conserved Plasmodium protein, unknown function	NA
3039	PF3D7_1034000	Pf3D7_10_v3	1359318	-	1992	-0.618	-1.037	-0.199	5.975	-3.003	0.00504	0.00504	-2.195	Sec1 family protein, putative	NA
3306	PF3D7_1119300	Pf3D7_11_v3	724855	-	885	-0.541	-0.907	-0.174	7.408	-3.001	0.00507	0.00507	-2.287	splicing factor U2AF small subunit, putative	U2AF1
1127	PF3D7_0516800	Pf3D7_05_v3	700120	-	7137	-0.847	-1.423	-0.272	3.931	-2.994	0.00515	0.00515	-2.16	transcription factor with AP2 domain(s)	ApiAP2
5507	PF3D7_1457600	Pf3D7_14_v3	2363578	+	1793	-0.497	-0.837	-0.158	5.972	-2.983	0.00531	0.00531	-2.244	conserved Plasmodium protein, unknown function	NA
770	PF3D7_0407500	Pf3D7_04_v3	369885	+	1386	-0.7	-1.179	-0.222	3.847	-2.978	0.00537	0.00537	-2.156	mitochondrial carrier protein, putative	NA
4917	PF3D7_1373400	Pf3D7_13_v3	2881591	+	1366	-1.699	-2.86	-0.538	0.878	-2.977	0.00539	0.00539	-2.167	rifin	RIF
4500	PF3D7_1331200	Pf3D7_13_v3	1306654	+	1346	-0.489	-0.824	-0.154	7.54	-2.965	0.00555	0.00555	-2.384	conserved Plasmodium protein, unknown function	NA
2831	PF3D7_1013900	Pf3D7_10_v3	545679	-	3225	-0.632	-1.071	-0.193	7.35	-2.928	0.00611	0.00611	-2.447	translation initiation factor eIF-2B subunit delta, putative	NA
3933	PF3D7_1230500	Pf3D7_12_v3	1253973	-	1509	-0.538	-0.915	-0.161	6.113	-2.905	0.00648	0.00648	-2.426	WD repeat-containing protein, putative	NA
3820	PF3D7_1219200	Pf3D7_12_v3	764448	+	704	-3.564	-6.051	-1.077	2.727	-2.937	0.00661	0.00661	-2.292	rifin, pseudogene	RIF
1842	PF3D7_0721200	Pf3D7_07_v3	917958	-	2859	-0.695	-1.185	-0.205	5.224	-2.887	0.00678	0.00678	-2.412	conserved Plasmodium protein, unknown function	NA
4320	PF3D7_1313500	Pf3D7_13_v3	573169	-	5311	-1.263	-2.154	-0.372	-1.628	-2.884	0.00683	0.00683	-2.408	conserved Plasmodium membrane protein, unknown function	NA
1724	PF3D7_0709300	Pf3D7_07_v3	413560	-	8190	-0.671	-1.146	-0.197	6.289	-2.879	0.00691	0.00691	-2.492	Cg2 protein, putative	CG2
5018	PF3D7_1409600	Pf3D7_14_v3	374800	+	2307	-0.704	-1.203	-0.205	5.68	-2.871	0.00707	0.00707	-2.477	conserved Plasmodium protein, unknown function	NA
5667	PF3D7_1473500	Pf3D7_14_v3	2993252	-	2028	-0.526	-0.902	-0.151	6.985	-2.851	0.00742	0.00742	-2.608	conserved Plasmodium protein, unknown function	NA
5614	PF3D7_1468200	Pf3D7_14_v3	2802508	+	681	-0.666	-1.145	-0.187	5.242	-2.829	0.00784	0.00784	-2.554	conserved protein, unknown function	NA
2421	PF3D7_0911400	Pf3D7_09_v3	522221	-	3798	-1.173	-2.017	-0.329	4.423	-2.826	0.00791	0.00791	-2.525	conserved Plasmodium protein, unknown function	NA
756	PF3D7_0406000	Pf3D7_04_v3	321019	+	1527	-0.689	-1.191	-0.187	5.738	-2.789	0.00867	0.00867	-2.661	conserved Plasmodium protein, unknown function	NA
1579	PF3D7_0627800	Pf3D7_06_v3	1114544	-	2994	-0.606	-1.048	-0.163	7.946	-2.782	0.00882	0.00882	-2.814	acetyl-CoA synthetase, putative	ACS
603	PF3D7_0315800	Pf3D7_03_v3	641482	-	1098	-0.464	-0.803	-0.125	6.623	-2.781	0.00884	0.00884	-2.744	zinc finger protein, putative	NA
3958	PF3D7_1233000	Pf3D7_12_v3	1355317	-	2412	-0.919	-1.593	-0.246	2.787	-2.775	0.00898	0.00898	-2.562	elongation factor G	EF-G
979	PF3D7_0502000	Pf3D7_05_v3	97657	+	4239	-0.559	-0.968	-0.149	6.891	-2.773	0.00904	0.00904	-2.774	vacuolar protein sorting-associated protein 11, putative	VPS11
4040	PF3D7_1241200	Pf3D7_12_v3	1748873	-	7365	-0.578	-1.002	-0.153	6.96	-2.765	0.0092	0.0092	-2.794	conserved Plasmodium protein, unknown function	NA
3791	PF3D7_1216400	Pf3D7_12_v3	653670	+	2766	-0.706	-1.227	-0.186	6.757	-2.759	0.00935	0.00935	-2.79	conserved Plasmodium membrane protein, unknown function	NA
4797	PF3D7_1361000	Pf3D7_13_v3	2445090	-	2175	-0.683	-1.187	-0.179	6.267	-2.757	0.00939	0.00939	-2.768	protein arginine N-methyltransferase 5, putative	PRMT5
1562	PF3D7_0626200	Pf3D7_06_v3	1058666	-	1257	-0.856	-1.489	-0.223	4.295	-2.75	0.00955	0.00955	-2.66	conserved Plasmodium protein, unknown function	NA
1203	PF3D7_0524400	Pf3D7_05_v3	1013453	-	1098	-0.524	-0.913	-0.135	7.81	-2.741	0.00978	0.00978	-2.893	ribosome-interacting GTPase 1, putative	RBG1
2068	PF3D7_0810500	Pf3D7_08_v3	534469	-	2151	-0.892	-1.555	-0.23	6.07	-2.74	0.00979	0.00979	-2.786	protein phosphatase PPM7, putative	PPM7
5562	PF3D7_1463000	Pf3D7_14_v3	2565357	-	927	-0.774	-1.35	-0.198	3.917	-2.732	0.00998	0.00998	-2.684	conserved Plasmodium protein, unknown function	NA
1459	PF3D7_0616300	Pf3D7_06_v3	676888	-	684	-0.615	-1.077	-0.152	4.175	-2.704	0.0107	0.0107	-2.751	conserved Plasmodium protein, unknown function	NA
2776	PF3D7_1008500	Pf3D7_10_v3	351703	+	3891	-0.49	-0.859	-0.121	6.193	-2.699	0.0108	0.0108	-2.885	conserved Plasmodium membrane protein, unknown function	NA
4897	PF3D7_1371300	Pf3D7_13_v3	2802945	+	4215	-3.514	-6.155	-0.874	2.753	-2.728	0.0109	0.0109	-2.693	28S ribosomal RNA	NA
4089	PF3D7_1246100	Pf3D7_12_v3	1915749	+	2050	-0.775	-1.36	-0.191	1.686	-2.697	0.0109	0.0109	-2.715	delta-aminolevulinic acid synthetase	ALAS
2034	PF3D7_0807100	Pf3D7_08_v3	372902	-	3966	-0.687	-1.207	-0.167	5.68	-2.684	0.0112	0.0112	-2.882	ATP-dependent RNA helicase DHH1, putative	DHH1
3859	PF3D7_1223200	Pf3D7_12_v3	932917	+	1365	-0.586	-1.031	-0.141	5.435	-2.679	0.0114	0.0114	-2.879	nucleus export protein BRR6, putative	NA
5251	PF3D7_1432200	Pf3D7_14_v3	1263826	+	5186	-0.982	-1.73	-0.233	1.705	-2.666	0.0117	0.0117	-2.79	conserved Plasmodium protein, unknown function	NA
2412	PF3D7_0910500	Pf3D7_09_v3	482461	-	5094	-0.585	-1.032	-0.139	5.537	-2.667	0.0117	0.0117	-2.904	DNA repair protein REV1, putative	NA
2913	PF3D7_1021600	Pf3D7_10_v3	871095	+	792	-0.478	-0.842	-0.113	5.702	-2.666	0.0117	0.0117	-2.932	deoxyribose-phosphate aldolase, putative	NA
5368	PF3D7_1443800	Pf3D7_14_v3	1794708	-	1227	-0.554	-0.977	-0.13	5.923	-2.657	0.012	0.012	-2.961	pre-mRNA-splicing factor CWC24, putative	CWC24
3080	PF3D7_1038100	Pf3D7_10_v3	1507582	-	2943	-0.617	-1.091	-0.144	5.465	-2.651	0.0122	0.0122	-2.943	GDP dissociation inhibitor, putative	NA
2466	PF3D7_0915900	Pf3D7_09_v3	665978	+	501	-0.518	-0.916	-0.121	6.294	-2.651	0.0122	0.0122	-2.996	conserved Plasmodium protein, unknown function	NA
1207	PF3D7_0524800	Pf3D7_05_v3	1021408	-	2900	-0.618	-1.096	-0.139	4.639	-2.624	0.013	0.013	-2.942	ubiquitin fusion degradation protein 1, putative	UFD1
4439	PF3D7_1325300	Pf3D7_13_v3	1050915	+	405	-1.282	-2.282	-0.282	-0.957	-2.608	0.0135	0.0135	-2.887	conserved Plasmodium protein, unknown function	NA
4260	PF3D7_1307700	Pf3D7_13_v3	344525	+	3708	-0.496	-0.886	-0.106	6.449	-2.585	0.0143	0.0143	-3.147	conserved Plasmodium protein, unknown function	NA
4942	PF3D7_1402300	Pf3D7_14_v3	85883	-	2001	-0.528	-0.945	-0.111	7.033	-2.574	0.0147	0.0147	-3.205	26S proteasome regulatory subunit RPN6	RPN6
3109	PF3D7_1041200	Pf3D7_10_v3	1639171	+	1348	-1.333	-2.387	-0.279	0.886	-2.571	0.0148	0.0148	-2.941	rifin	RIF
1171	PF3D7_0521200	Pf3D7_05_v3	868892	+	987	-1.028	-1.842	-0.215	0.354	-2.57	0.0148	0.0148	-2.943	conserved Plasmodium protein, unknown function	NA
1166	PF3D7_0520700	Pf3D7_05_v3	845843	-	2925	-0.574	-1.03	-0.118	4.622	-2.562	0.0151	0.0151	-3.062	conserved Plasmodium protein, unknown function	NA
602	PF3D7_0315700	Pf3D7_03_v3	638283	+	3024	-0.564	-1.012	-0.116	4.337	-2.562	0.0151	0.0151	-3.062	conserved Plasmodium membrane protein, unknown function	NA
276	PF3D7_0207300	Pf3D7_02_v3	290168	-	2536	-1.38	-2.478	-0.281	-4.099	-2.555	0.0154	0.0154	-3.044	serine repeat antigen 8	SERA8
1773	PF3D7_0714200	Pf3D7_07_v3	650834	+	4086	-0.53	-0.953	-0.106	6.911	-2.545	0.0157	0.0157	-3.268	conserved Plasmodium protein, unknown function	NA
2435	PF3D7_0912800	Pf3D7_09_v3	563329	-	1851	-0.466	-0.838	-0.094	7.058	-2.546	0.0157	0.0157	-3.273	tRNA (adenine(58)-N(1))-methyltransferase non-catalytic subunit TRM6, putative	GCD10
645	PF3D7_0319900	Pf3D7_03_v3	833833	-	945	-0.828	-1.492	-0.164	3.598	-2.536	0.0161	0.0161	-3.063	conserved Plasmodium protein, unknown function	NA
3421	PF3D7_1130600	Pf3D7_11_v3	1176441	+	3265	-0.617	-1.113	-0.122	5.795	-2.533	0.0162	0.0162	-3.206	methyltransferase, putative	NA
1960	PF3D7_0732900	Pf3D7_07_v3	1414434	+	1250	-1.34	-2.423	-0.258	1.459	-2.519	0.0167	0.0167	-3.045	rifin	RIF
5594	PF3D7_1466200	Pf3D7_14_v3	2694813	-	9237	-0.802	-1.45	-0.154	5.425	-2.518	0.0168	0.0168	-3.249	conserved Plasmodium protein, unknown function	NA
2573	PF3D7_0926400	Pf3D7_09_v3	1070965	-	1991	-0.511	-0.926	-0.096	4.798	-2.504	0.0173	0.0173	-3.205	monocarboxylate transporter, putative	NA
2990	PF3D7_1029200	Pf3D7_10_v3	1195677	+	1668	-0.371	-0.672	-0.07	6.624	-2.505	0.0173	0.0173	-3.331	WD repeat-containing protein, putative	NA
2459	PF3D7_0915200	Pf3D7_09_v3	645632	+	969	-0.731	-1.327	-0.134	2.348	-2.491	0.0179	0.0179	-3.108	ribonuclease H2 subunit C, putative	NA
5602	PF3D7_1467000	Pf3D7_14_v3	2742387	+	2871	-0.514	-0.935	-0.093	4.597	-2.485	0.0182	0.0182	-3.238	conserved Plasmodium membrane protein, unknown function	NA
4919	PF3D7_1400100	Pf3D7_14_v3	1393	+	3951	-1.002	-1.824	-0.179	5.151	-2.479	0.0185	0.0185	-3.299	erythrocyte membrane protein 1 (PfEMP1), pseudogene	NA
1874	PF3D7_0724400	Pf3D7_07_v3	1023651	+	471	-0.526	-0.958	-0.093	5.298	-2.474	0.0186	0.0186	-3.29	mitochondrial import inner membrane translocase subunit TIM14, putative	PAM18
1324	PF3D7_0603100	Pf3D7_06_v3	125458	-	1359	-0.819	-1.499	-0.14	0.722	-2.453	0.0196	0.0196	-3.154	RNA-binding protein, putative	NA
3973	PF3D7_1234500	Pf3D7_12_v3	1439896	-	1155	-0.6	-1.101	-0.099	5.572	-2.436	0.0203	0.0203	-3.382	conserved Plasmodium protein, unknown function	NA
535	PF3D7_0309300	Pf3D7_03_v3	397649	+	2868	-0.547	-1.003	-0.09	7.649	-2.437	0.0203	0.0203	-3.536	N2227-like protein, putative	NA
2214	PF3D7_0825000	Pf3D7_08_v3	1086048	+	5201	-0.614	-1.128	-0.1	5.179	-2.43	0.0206	0.0206	-3.392	conserved Plasmodium protein, unknown function	NA
63	PF3D7_0102100	Pf3D7_01_v3	95050	+	850	-2.446	-4.493	-0.399	0.008	-2.437	0.0207	0.0207	-3.191	stevor, pseudogene	NA
4920	PF3D7_1400200	Pf3D7_14_v3	7208	-	1331	-1.333	-2.454	-0.212	1.338	-2.418	0.0212	0.0212	-3.221	rifin	RIF
2058	PF3D7_0809500	Pf3D7_08_v3	478512	-	315	-0.668	-1.23	-0.106	4.295	-2.419	0.0212	0.0212	-3.334	histone acetyltransferase subunit NuA4, putative	NA
983	PF3D7_0502400	Pf3D7_05_v3	109898	-	1794	-0.453	-0.834	-0.072	8.594	-2.417	0.0213	0.0213	-3.63	merozoite surface protein 8	MSP8
1607	PF3D7_0630600	Pf3D7_06_v3	1279820	+	3427	-0.6	-1.105	-0.094	5.279	-2.413	0.0215	0.0215	-3.397	conserved protein, unknown function	NA
3222	PF3D7_1111200	Pf3D7_11_v3	439698	-	1983	-0.522	-0.962	-0.081	5.016	-2.408	0.0217	0.0217	-3.403	conserved Plasmodium protein, unknown function	NA
2790	PF3D7_1009900	Pf3D7_10_v3	399207	+	2572	-0.539	-0.995	-0.082	5.42	-2.402	0.0221	0.0221	-3.452	conserved Plasmodium protein, unknown function	NA
2403	PF3D7_0909600	Pf3D7_09_v3	433238	-	2136	-0.789	-1.458	-0.12	3.185	-2.398	0.0222	0.0222	-3.347	conserved Plasmodium protein, unknown function	NA
2093	PF3D7_0812800	Pf3D7_08_v3	635537	-	219	-0.899	-1.663	-0.136	1.157	-2.395	0.0224	0.0224	-3.258	conserved Plasmodium protein, unknown function	NA
3464	PF3D7_1134900	Pf3D7_11_v3	1369619	+	2049	-0.823	-1.523	-0.124	0.822	-2.393	0.0225	0.0225	-3.265	conserved Plasmodium protein, unknown function	NA
5361	PF3D7_1443100	Pf3D7_14_v3	1769626	-	1725	-0.627	-1.161	-0.094	5.91	-2.392	0.0225	0.0225	-3.508	conserved Plasmodium protein, unknown function	NA
4820	PF3D7_1363200	Pf3D7_13_v3	2539948	-	1593	-0.65	-1.205	-0.095	4.49	-2.38	0.0232	0.0232	-3.418	bifunctional polynucleotide phosphatase/kinase	PNKP
5224	PF3D7_1429500	Pf3D7_14_v3	1164332	+	2235	-0.512	-0.951	-0.072	5.729	-2.366	0.0239	0.0239	-3.531	diphthamide biosynthesis protein 2, putative	DPH2
203	PF3D7_0200200	Pf3D7_02_v3	33030	-	1230	-1.474	-2.745	-0.202	1.476	-2.359	0.0244	0.0244	-3.336	rifin	RIF
1559	PF3D7_0625900	Pf3D7_06_v3	1046986	+	1067	-0.889	-1.658	-0.121	-0.404	-2.353	0.0247	0.0247	-3.324	conserved Plasmodium protein, unknown function	NA
2883	PF3D7_1018700	Pf3D7_10_v3	747028	+	1860	-0.417	-0.778	-0.055	8.326	-2.344	0.0252	0.0252	-3.76	conserved Plasmodium protein, unknown function	NA
3035	PF3D7_1033600	Pf3D7_10_v3	1344150	-	2748	-0.393	-0.735	-0.051	8.566	-2.34	0.0254	0.0254	-3.782	myb2 transcription factor, putative	Myb2
3758	PF3D7_1213100	Pf3D7_12_v3	576417	-	164	-1.265	-2.368	-0.162	2.668	-2.335	0.0258	0.0258	-3.429	U1 spliceosomal RNA	NA
4742	PF3D7_1355400	Pf3D7_13_v3	2197906	-	73	-0.821	-1.537	-0.104	-0.225	-2.328	0.0261	0.0261	-3.363	tRNA Threonine	NA
3606	PF3D7_1148640	Pf3D7_11_v3	1928934	+	4205	-2.409	-4.513	-0.305	3.263	-2.343	0.0263	0.0263	-3.41	28S ribosomal RNA	NA
4389	PF3D7_1320400	Pf3D7_13_v3	841671	-	1080	-0.821	-1.542	-0.101	1.52	-2.318	0.0268	0.0268	-3.41	type I signal peptidase	SPB
3049	PF3D7_1035000	Pf3D7_10_v3	1386649	-	2982	-0.607	-1.142	-0.072	5.853	-2.309	0.0273	0.0273	-3.671	U2 snRNA/tRNA pseudouridine synthase, putative	NA
2012	PF3D7_0804900	Pf3D7_08_v3	279711	-	1476	-0.459	-0.863	-0.054	6.746	-2.306	0.0275	0.0275	-3.737	GTPase-activating protein, putative	NA
5670	PF3D7_1473900	Pf3D7_14_v3	3007601	+	2559	-0.484	-0.911	-0.057	6.956	-2.303	0.0276	0.0276	-3.758	conserved Plasmodium protein, unknown function	NA
818	PF3D7_0412200	Pf3D7_04_v3	541811	-	999	-0.607	-1.143	-0.071	3.669	-2.302	0.0277	0.0277	-3.506	conserved Plasmodium protein, unknown function	NA
1988	PF3D7_0802500	Pf3D7_08_v3	174647	-	4260	-0.496	-0.934	-0.058	6.295	-2.301	0.0278	0.0278	-3.706	inositol 5-phosphatase, putative	NA
3936	PF3D7_1230800	Pf3D7_12_v3	1263661	+	1933	-0.357	-0.672	-0.041	8.807	-2.301	0.0278	0.0278	-3.876	pre-mRNA-splicing regulator, putative	NA
4018	PF3D7_1239000	Pf3D7_12_v3	1621237	-	2469	-0.427	-0.806	-0.048	6.591	-2.293	0.0283	0.0283	-3.748	HD superfamily phosphohydrolase protein	NA
5233	PF3D7_1430400	Pf3D7_14_v3	1201748	+	2592	-0.975	-1.842	-0.109	3.367	-2.29	0.0285	0.0285	-3.503	autophagy protein 5, putative	ATG5
1035	PF3D7_0507700	Pf3D7_05_v3	316766	-	1596	-0.467	-0.882	-0.052	6.355	-2.287	0.0287	0.0287	-3.741	nuclear protein localization protein 4, putative	NPL4
4252	PF3D7_1306900	Pf3D7_13_v3	323472	+	1561	-0.376	-0.711	-0.042	6.749	-2.287	0.0287	0.0287	-3.774	U1 small nuclear ribonucleoprotein A, putative	SNRPA
1322	PF3D7_0602900	Pf3D7_06_v3	118638	-	1566	-0.585	-1.106	-0.064	5.047	-2.284	0.0289	0.0289	-3.661	conserved Plasmodium protein, unknown function	NA
5157	PF3D7_1423000	Pf3D7_14_v3	924964	-	1464	-0.363	-0.688	-0.039	7.964	-2.281	0.0291	0.0291	-3.869	nucleolar GTP-binding protein 2, putative	NOG2
746	PF3D7_0405000	Pf3D7_04_v3	268960	-	2175	-0.359	-0.679	-0.039	7.046	-2.279	0.0292	0.0292	-3.806	ATP-dependent RNA helicase DDX51, putative	DDX51
1680	PF3D7_0705100	Pf3D7_07_v3	252282	+	2970	-1.052	-1.993	-0.111	0.719	-2.273	0.0296	0.0296	-3.458	conserved Plasmodium protein, unknown function	NA
4133	PF3D7_1250400	Pf3D7_12_v3	2067400	+	1971	-1.284	-2.433	-0.134	-1.149	-2.271	0.0298	0.0298	-3.456	conserved Plasmodium protein, unknown function	NA
4101	PF3D7_1247200	Pf3D7_12_v3	1950989	-	525	-0.66	-1.254	-0.067	3.746	-2.262	0.0303	0.0303	-3.581	conserved Plasmodium protein, unknown function	NA
3442	PF3D7_1132700	Pf3D7_11_v3	1268455	+	1002	-0.774	-1.472	-0.077	2.448	-2.258	0.0306	0.0306	-3.535	50S ribosomal protein L2, putative	mRPL2
2982	PF3D7_1028500	Pf3D7_10_v3	1172129	-	2869	-0.404	-0.769	-0.04	7.202	-2.256	0.0307	0.0307	-3.863	conserved Plasmodium protein, unknown function	NA
3786	PF3D7_1215900	Pf3D7_12_v3	641552	+	1968	-0.557	-1.059	-0.055	5.077	-2.255	0.0308	0.0308	-3.692	serpentine receptor, putative	SR10
1143	PF3D7_0518400	Pf3D7_05_v3	762103	-	690	-0.784	-1.493	-0.076	1.585	-2.253	0.031	0.031	-3.523	cyclin, putative	CYC3
4464	PF3D7_1327800	Pf3D7_13_v3	1162620	+	1683	-0.642	-1.223	-0.061	7.234	-2.248	0.0313	0.0313	-3.874	ribose-phosphate pyrophosphokinase, putative	NA
371	PF3D7_0216600	Pf3D7_02_v3	686485	+	2061	-0.517	-0.984	-0.049	6.901	-2.247	0.0313	0.0313	-3.86	MtN3-like protein	NA
418	PF3D7_0221100	Pf3D7_02_v3	851052	+	911	-1.363	-2.599	-0.126	-3.509	-2.241	0.0318	0.0318	-3.51	Plasmodium exported protein, unknown function, pseudogene	NA
5642	PF3D7_1471000	Pf3D7_14_v3	2902134	+	1404	-0.372	-0.711	-0.034	6.529	-2.237	0.0321	0.0321	-3.851	RNA 3'-terminal phosphate cyclase-like protein, putative	RCL1
5656	PF3D7_1472400	Pf3D7_14_v3	2957474	+	4145	-0.629	-1.202	-0.056	4.505	-2.232	0.0325	0.0325	-3.71	M1-family alanyl aminopeptidase, putative	NA
978	PF3D7_0501900	Pf3D7_05_v3	95161	-	1473	-0.573	-1.095	-0.05	3.238	-2.23	0.0326	0.0326	-3.62	conserved protein, unknown function	NA
3863	PF3D7_1223600	Pf3D7_12_v3	962631	-	4861	-0.514	-0.982	-0.045	3.541	-2.229	0.0327	0.0327	-3.64	conserved Plasmodium protein, unknown function	NA
5726	PF3D7_1479500	Pf3D7_14_v3	3269494	+	1003	-1.423	-2.723	-0.123	-3	-2.227	0.0328	0.0328	-3.527	stevor	NA
4425	PF3D7_1323900	Pf3D7_13_v3	989468	+	1131	-0.48	-0.918	-0.041	8.125	-2.225	0.033	0.033	-3.986	protein BCP1, putative	NA
3901	PF3D7_1227400	Pf3D7_12_v3	1109151	-	3519	-0.489	-0.936	-0.042	6.614	-2.223	0.0331	0.0331	-3.888	conserved Plasmodium protein, unknown function	NA
1747	PF3D7_0711600	Pf3D7_07_v3	508474	+	136	-1.218	-2.335	-0.101	-4.154	-2.218	0.0335	0.0335	-3.551	Plasmodium RNA of unknown function RUF6	NA
5668	PF3D7_1473600	Pf3D7_14_v3	2997600	-	345	-1.069	-2.051	-0.087	0.722	-2.213	0.0338	0.0338	-3.566	conserved Plasmodium protein, unknown function	NA
2650	PF3D7_0933900	Pf3D7_09_v3	1338175	-	1121	-0.446	-0.857	-0.035	6.906	-2.209	0.0341	0.0341	-3.939	conserved Plasmodium protein, unknown function	NA
4598	PF3D7_1341000	Pf3D7_13_v3	1631333	+	74	-0.981	-1.884	-0.077	-1.418	-2.207	0.0343	0.0343	-3.553	tRNA Arginine	NA
4793	PF3D7_1360500	Pf3D7_13_v3	2413324	+	11938	-0.546	-1.049	-0.043	2.933	-2.207	0.0343	0.0343	-3.688	guanylyl cyclase beta	GCbeta
4512	PF3D7_1332400	Pf3D7_13_v3	1337117	-	2577	-0.465	-0.894	-0.036	6.777	-2.202	0.0347	0.0347	-3.938	nucleotidyltransferase, putative	NA
2511	PF3D7_0920400	Pf3D7_09_v3	833754	+	5559	-1.015	-1.954	-0.077	3.458	-2.2	0.0348	0.0348	-3.678	conserved Plasmodium protein, unknown function	NA
686	PF3D7_0324000	Pf3D7_03_v3	1005952	+	849	-0.96	-1.849	-0.071	-0.788	-2.197	0.0351	0.0351	-3.576	exported protein family 1	EPF1
62	PF3D7_0102000	Pf3D7_01_v3	93113	-	763	-2.056	-3.961	-0.151	-1.455	-2.198	0.0353	0.0353	-3.57	Plasmodium exported protein (PHISTa), unknown function, pseudogene	NA
5603	PF3D7_1467100	Pf3D7_14_v3	2745815	-	1506	-0.52	-1.003	-0.038	4.698	-2.194	0.0353	0.0353	-3.783	DNA-3-methyladenine glycosylase, putative	NA
5561	PF3D7_1462900	Pf3D7_14_v3	2561069	-	2424	-0.48	-0.926	-0.034	4.708	-2.189	0.0357	0.0357	-3.793	conserved Plasmodium protein, unknown function	NA
3504	PF3D7_1138500	Pf3D7_11_v3	1518464	+	2775	-0.335	-0.647	-0.024	8.818	-2.189	0.0357	0.0357	-4.095	protein phosphatase 2C	PPM2
2386	PF3D7_0908000	Pf3D7_09_v3	369870	-	1685	-1.458	-2.815	-0.101	2.641	-2.189	0.0361	0.0361	-3.668	P1 nuclease, putative	NA
3307	PF3D7_1119400	Pf3D7_11_v3	727896	+	6444	-0.352	-0.679	-0.024	7.683	-2.184	0.0361	0.0361	-4.031	ubiquitin-protein ligase, putative	NA
2484	PF3D7_0917700	Pf3D7_09_v3	732951	+	1077	-0.68	-1.314	-0.046	2.359	-2.181	0.0363	0.0363	-3.655	XPA binding protein 1, putative	NA
1144	PF3D7_0518500	Pf3D7_05_v3	763532	-	3372	-0.47	-0.908	-0.031	8.254	-2.18	0.0365	0.0365	-4.08	ATP-dependent RNA helicase DDX23, putative	DDX23
5583	PF3D7_1465100	Pf3D7_14_v3	2637566	+	2604	-0.511	-0.988	-0.034	2.013	-2.177	0.0366	0.0366	-3.677	conserved oligomeric Golgi complex subunit 6, putative	COG6
5799	PF3D7_API06700	Pf3D7_API_v3	31447	+	2692	-1.629	-3.152	-0.106	-1.053	-2.175	0.0369	0.0369	-3.602	large subunit ribosomal RNA	NA
4833	PF3D7_1364500	Pf3D7_13_v3	2596389	+	1434	-0.559	-1.082	-0.036	6.049	-2.174	0.0369	0.0369	-3.931	exosome complex component RRP45, putative	RRP45
4087	PF3D7_1245900	Pf3D7_12_v3	1910963	+	936	-0.45	-0.872	-0.028	5.267	-2.17	0.0372	0.0372	-3.868	conserved Plasmodium protein, unknown function	NA
4516	PF3D7_1332800	Pf3D7_13_v3	1348779	+	744	-0.413	-0.801	-0.025	7.23	-2.166	0.0376	0.0376	-4.037	eukaryotic translation initiation factor 6, putative	NA
1464	PF3D7_0616800	Pf3D7_06_v3	695929	+	1566	-0.611	-1.185	-0.037	3.441	-2.163	0.0378	0.0378	-3.78	malate:quinone oxidoreductase, putative	MQO
5655	PF3D7_1472300	Pf3D7_14_v3	2954108	+	3001	-0.652	-1.268	-0.036	5.375	-2.154	0.0386	0.0386	-3.896	conserved Plasmodium membrane protein, unknown function	NA
765	PF3D7_0407000	Pf3D7_04_v3	360547	-	1218	-0.525	-1.02	-0.029	5.538	-2.152	0.0387	0.0387	-3.931	conserved Plasmodium protein, unknown function	NA
2745	PF3D7_1005400	Pf3D7_10_v3	234795	-	951	-0.879	-1.711	-0.048	-2.169	-2.15	0.0389	0.0389	-3.639	conserved Plasmodium protein, unknown function	NA
3285	PF3D7_1117300	Pf3D7_11_v3	662000	+	387	-0.551	-1.074	-0.029	5.039	-2.146	0.0393	0.0393	-3.891	conserved Plasmodium protein, unknown function	NA
5472	PF3D7_1454200	Pf3D7_14_v3	2222490	-	4215	-0.573	-1.118	-0.027	5.333	-2.135	0.0402	0.0402	-3.943	conserved Plasmodium protein, unknown function	NA
2591	PF3D7_0928100	Pf3D7_09_v3	1136966	-	1218	-0.654	-1.28	-0.029	2.286	-2.127	0.0409	0.0409	-3.784	conserved Plasmodium protein, unknown function	NA
3987	PF3D7_1235900	Pf3D7_12_v3	1497687	-	3725	-0.426	-0.834	-0.019	8.288	-2.127	0.0409	0.0409	-4.18	pre-mRNA-splicing factor SYF1, putative	XAB2
5451	PF3D7_1452100	Pf3D7_14_v3	2141662	+	1017	-0.653	-1.278	-0.028	3.078	-2.124	0.0412	0.0412	-3.789	leucine-rich repeat protein	LRR3
1112	PF3D7_0515300	Pf3D7_05_v3	628981	+	6402	-0.574	-1.123	-0.024	6.447	-2.124	0.0412	0.0412	-4.059	phosphatidylinositol 3-kinase	PI3K
4974	PF3D7_1405300	Pf3D7_14_v3	181955	+	3078	-0.796	-1.559	-0.033	3.308	-2.123	0.0413	0.0413	-3.796	conserved Plasmodium protein, unknown function	NA
1572	PF3D7_0627100	Pf3D7_06_v3	1089190	+	5139	-0.521	-1.02	-0.022	8.705	-2.122	0.0414	0.0414	-4.209	ankyrin-repeat protein, putative	NA
252	PF3D7_0205000	Pf3D7_02_v3	212982	-	1527	-0.86	-1.687	-0.034	1.41	-2.118	0.0417	0.0417	-3.778	conserved Plasmodium protein, unknown function	NA
4426	PF3D7_1324000	Pf3D7_13_v3	990899	-	4380	-0.506	-0.992	-0.02	6.952	-2.118	0.0417	0.0417	-4.106	conserved Plasmodium protein, unknown function	NA
249	PF3D7_0204700	Pf3D7_02_v3	205889	-	1515	-0.405	-0.794	-0.016	7.811	-2.116	0.0419	0.0419	-4.161	hexose transporter	HT
1793	PF3D7_0716200	Pf3D7_07_v3	712469	+	2499	-0.41	-0.803	-0.016	9.724	-2.115	0.042	0.042	-4.29	conserved Plasmodium protein, unknown function	NA
4779	PF3D7_1359100	Pf3D7_13_v3	2347863	-	2124	-0.452	-0.887	-0.017	5.813	-2.112	0.0423	0.0423	-4.031	riboflavin kinase / FAD synthase family protein, putative	NA
5282	PF3D7_1435300	Pf3D7_14_v3	1421901	-	9321	-0.581	-1.141	-0.021	3.339	-2.109	0.0425	0.0425	-3.897	NAD(P)H-dependent glutamate synthase, putative	NA
349	PF3D7_0214400	Pf3D7_02_v3	586765	-	2287	-0.315	-0.619	-0.011	9.074	-2.11	0.0425	0.0425	-4.261	conserved Plasmodium protein, unknown function	NA
1026	PF3D7_0506800	Pf3D7_05_v3	284691	+	3333	-0.394	-0.775	-0.014	7.58	-2.108	0.0427	0.0427	-4.162	transcription factor 25, putative	TCF25
3819	PF3D7_1219100	Pf3D7_12_v3	757649	+	5994	-0.408	-0.803	-0.014	8.391	-2.104	0.043	0.043	-4.223	clathrin heavy chain, putative	NA
170	PF3D7_0112700	Pf3D7_01_v3	477279	+	4104	-1.475	-2.901	-0.048	7.045	-2.119	0.0432	0.0432	-4.104	28S ribosomal RNA	NA
3667	PF3D7_1204100	Pf3D7_12_v3	198970	-	3270	-0.577	-1.138	-0.017	5.884	-2.095	0.0438	0.0438	-4.137	conserved Plasmodium protein, unknown function	NA
2927	PF3D7_1023000	Pf3D7_10_v3	961066	-	1242	-0.585	-1.153	-0.017	2.229	-2.093	0.044	0.044	-3.804	conserved Plasmodium membrane protein, unknown function	NA
1446	PF3D7_0615000	Pf3D7_06_v3	622272	+	441	-0.544	-1.072	-0.015	5.487	-2.093	0.044	0.044	-4.024	conserved Plasmodium protein, unknown function	NA
5367	PF3D7_1443700	Pf3D7_14_v3	1791911	-	1094	-0.658	-1.299	-0.017	0.265	-2.088	0.0445	0.0445	-3.769	dephospho-CoA kinase, putative	DPCK
5360	PF3D7_1443000	Pf3D7_14_v3	1764316	-	3807	-0.797	-1.576	-0.019	1.165	-2.083	0.045	0.045	-3.814	serine/threonine protein kinase	SRPK2
2393	PF3D7_0908600	Pf3D7_09_v3	399202	-	1524	-0.377	-0.747	-0.007	6.41	-2.07	0.0463	0.0463	-4.153	ribosomal RNA methyltransferase, putative	NA
5048	PF3D7_1412400	Pf3D7_14_v3	493971	-	10375	-0.397	-0.789	-0.005	7.027	-2.062	0.0471	0.0471	-4.218	conserved Plasmodium protein, unknown function	NA
4395	PF3D7_1321000	Pf3D7_13_v3	859299	+	2049	-0.94	-1.869	-0.011	-0.504	-2.057	0.0476	0.0476	-3.791	conserved Plasmodium protein, unknown function	NA
2179	PF3D7_0821500	Pf3D7_08_v3	967901	-	840	-0.448	-0.892	-0.004	6.184	-2.051	0.0482	0.0482	-4.16	ribosomal RNA small subunit methyltransferase NEP1, putative	NEP1
5781	PF3D7_API04900	Pf3D7_API_v3	24053	-	2696	-1.436	-2.862	-0.011	-0.476	-2.049	0.0484	0.0484	-3.795	large subunit ribosomal RNA	NA
4384	PF3D7_1319900	Pf3D7_13_v3	822078	-	4470	-0.912	-1.816	-0.007	2.634	-2.049	0.0484	0.0484	-3.919	conserved Plasmodium protein, unknown function	NA
3558	PF3D7_1143800	Pf3D7_11_v3	1748439	+	2700	-0.35	-0.697	-0.002	7.376	-2.048	0.0485	0.0485	-4.266	conserved Plasmodium protein, unknown function	NA
1514	PF3D7_0621500	Pf3D7_06_v3	881963	+	1032	-0.573	-1.142	-0.004	2.472	-2.047	0.0486	0.0486	-3.887	ribonuclease P/MRP protein subunit RPP1, putative	RPP1
3436	PF3D7_1132100	Pf3D7_11_v3	1243226	-	3393	-0.601	-1.2	-0.003	3.338	-2.044	0.049	0.049	-4.027	RNA-binding protein, putative	NA
4467	PF3D7_1328100	Pf3D7_13_v3	1184208	+	813	-0.392	-0.783	-0.002	6.996	-2.042	0.0491	0.0491	-4.239	proteasome subunit beta type-7, putative	NA
2783	PF3D7_1009200	Pf3D7_10_v3	374864	+	2748	-0.661	-1.319	-0.002	6.28	-2.041	0.0493	0.0493	-4.178	small subunit rRNA synthesis-associated protein, putative	NA
3604	PF3D7_1148600	Pf3D7_11_v3	1925995	+	2150	-1.374	-2.748	-0.001	1.941	-2.037	0.0499	0.0499	-3.883	18S ribosomal RNA	NA

## Sheet: manual selection_PfEMP1 biology
	GeneID	Chr	Start	Strand	Length	logFC	CI.L	CI.R	AveExpr	t	P.Value	adj.P.Val	B	[Product Description]	[Gene Name or Symbol]
5693	PF3D7_1476200	Pf3D7_14_v3	3133951	+	1701	1.45	0.576	2.325	6.368	3.382	0.00196	0.00196	-1.4	Plasmodium exported protein (PHISTb), unknown function	NA
1841	PF3D7_0721100	Pf3D7_07_v3	916434	+	735	1.147	0.406	1.888	3.681	3.147	0.00347	0.00347	-1.815	conserved Plasmodium protein, unknown function	NA
2711	PF3D7_1002100	Pf3D7_10_v3	106653	-	2010	0.502	0.166	0.838	10.491	3.041	0.00457	0.00457	-2.36	EMP1-trafficking protein	PTP5
1127	PF3D7_0516800	Pf3D7_05_v3	700120	-	7137	-0.847	-1.423	-0.272	3.931	-2.994	0.00515	0.00515	-2.16	transcription factor with AP2 domain(s)	ApiAP2
1598	PF3D7_0629700	Pf3D7_06_v3	1221941	+	20982	0.451	0.141	0.761	8.901	2.956	0.00569	0.00569	-2.483	SET domain protein, putative	SET1
943	PF3D7_0424600	Pf3D7_04_v3	1113345	-	1142	0.511	0.133	0.89	9.094	2.75	0.00956	0.00956	-2.959	Plasmodium exported protein (PHISTb), unknown function	NA
1285	PF3D7_0532300	Pf3D7_05_v3	1308278	+	1663	0.936	0.159	1.714	9.618	2.46	0.0199	0.0199	-3.638	Plasmodium exported protein (PHISTb), unknown function	NA
1286	PF3D7_0532400	Pf3D7_05_v3	1312471	+	1684	0.773	0.129	1.417	7.337	2.442	0.0202	0.0202	-3.537	lysine-rich membrane-associated PHISTb protein	LyMP
2365	PF3D7_0906000	Pf3D7_09_v3	298665	-	5515	0.785	0.095	1.475	3.323	2.314	0.027	0.027	-3.501	exoribonuclease II	RNaseII
4531	PF3D7_1334300	Pf3D7_13_v3	1400897	-	1380	1.065	0.121	2.008	2.788	2.295	0.0282	0.0282	-3.525	MSP7-like protein	MSRP5
4720	PF3D7_1353100	Pf3D7_13_v3	2124272	-	999	0.588	0.061	1.114	9.332	2.269	0.0298	0.0298	-3.973	Plasmodium exported protein, unknown function	NA
972	PF3D7_0501300	Pf3D7_05_v3	68930	+	1184	0.456	0.027	0.885	12.251	2.162	0.0379	0.0379	-4.338	skeleton-binding protein 1	SBP1
223	PF3D7_0202200	Pf3D7_02_v3	112547	-	1136	0.366	0.015	0.717	9.411	2.119	0.0416	0.0416	-4.27	EMP1-trafficking protein	PTP1
945	PF3D7_0424800	Pf3D7_04_v3	1123986	+	1019	0.692	-0.005	1.39	6.748	2.02	0.0517	0.0517	-4.302	Plasmodium exported protein (PHISTb), unknown function	NA
2708	PF3D7_1001800	Pf3D7_10_v3	96113	-	919	0.473	-0.011	0.957	6.932	1.987	0.0552	0.0552	-4.369	Plasmodium exported protein (PHISTc), unknown function	NA
1749	PF3D7_0711800	Pf3D7_07_v3	523147	+	135	-1.239	-2.56	0.082	-4.118	-1.908	0.065	0.065	-3.97	Plasmodium RNA of unknown function RUF6	NA
4201	PF3D7_1302000	Pf3D7_13_v3	112792	-	1024	0.219	-0.044	0.483	8.832	1.694	0.0996	0.0996	-4.952	EMP1-trafficking protein	PTP6
4697	PF3D7_1350900	Pf3D7_13_v3	2027073	-	1566	-1.048	-2.355	0.259	2.413	-1.634	0.112	0.112	-4.549	transcription factor with AP2 domain(s)	ApiAP2
1653	PF3D7_0702400	Pf3D7_07_v3	101694	+	592	0.56	-0.145	1.266	7.444	1.617	0.116	0.116	-4.989	small exported membrane protein 1	SEMP1
2329	PF3D7_0902700	Pf3D7_09_v3	119261	-	1489	0.768	-0.21	1.746	2.209	1.598	0.119	0.119	-4.6	Plasmodium exported protein (PHISTb), unknown function, pseudogene	NA
4741	PF3D7_1355300	Pf3D7_13_v3	2195449	+	1530	-0.368	-0.856	0.12	6.298	-1.535	0.134	0.134	-5.007	histone-lysine N-methyltransferase, putative	SET6
4904	PF3D7_1372100	Pf3D7_13_v3	2837053	+	2006	0.667	-0.226	1.559	2.369	1.519	0.138	0.138	-4.777	Plasmodium exported protein (PHISTb), unknown function	GEXP04
4639	PF3D7_1345100	Pf3D7_13_v3	1809736	-	786	0.374	-0.155	0.903	5.432	1.436	0.16	0.16	-5.069	thioredoxin 2	TRX2
5444	PF3D7_1451400	Pf3D7_14_v3	2108874	+	3915	-0.307	-0.76	0.147	5.105	-1.376	0.178	0.178	-5.084	transcriptional regulatory protein sir2b	Sir2B
3404	PF3D7_1129100	Pf3D7_11_v3	1125952	+	1359	0.238	-0.115	0.591	9.846	1.372	0.179	0.179	-5.482	parasitophorous vacuolar protein 1	PV1
4533	PF3D7_1334500	Pf3D7_13_v3	1405731	-	1782	0.683	-0.339	1.705	1.438	1.36	0.183	0.183	-4.831	MSP7-like protein	MSRP6
1408	PF3D7_0611400	Pf3D7_06_v3	471658	-	2493	-0.349	-0.908	0.21	6.033	-1.27	0.213	0.213	-5.313	SWIB/MDM2 domain-containing protein	SWIB
2670	PF3D7_0935900	Pf3D7_09_v3	1420483	-	2325	0.292	-0.193	0.776	14.004	1.226	0.229	0.229	-5.866	ring-exported protein 1	REX1
2675	PF3D7_0936400	Pf3D7_09_v3	1440783	+	878	-0.399	-1.087	0.288	5.631	-1.181	0.246	0.246	-5.384	ring-exported protein 4	REX4
4407	PF3D7_1322100	Pf3D7_13_v3	920971	+	8479	0.231	-0.172	0.633	9.009	1.166	0.252	0.252	-5.691	histone-lysine N-methyltransferase SET2	SET2
5133	PF3D7_1420700	Pf3D7_14_v3	860011	+	3070	0.211	-0.173	0.594	11.336	1.117	0.272	0.272	-5.876	surface protein P113	P113
4474	PF3D7_1328800	Pf3D7_13_v3	1214907	+	822	-0.266	-0.772	0.239	6.737	-1.072	0.292	0.292	-5.631	transcriptional regulatory protein sir2a	SIR2A
971	PF3D7_0501200	Pf3D7_05_v3	64065	+	1425	0.38	-0.409	1.169	6.231	0.981	0.334	0.334	-5.67	parasite-infected erythrocyte surface protein	PIESP2
4167	PF3D7_1253800	Pf3D7_12_v3	2196157	+	966	2.019	-2.482	6.519	1.665	0.921	0.365	0.365	-5.325	Plasmodium exported protein (PHISTa), unknown function	NA
2709	PF3D7_1001900	Pf3D7_10_v3	99379	-	983	0.277	-0.337	0.892	7.678	0.918	0.365	0.365	-5.839	Plasmodium exported protein (hyp16), unknown function	PfJ23
4721	PF3D7_1353200	Pf3D7_13_v3	2130531	+	535	0.202	-0.261	0.666	10.133	0.887	0.381	0.381	-6.021	membrane associated histidine-rich protein	MAHRP2
3263	PF3D7_1115200	Pf3D7_11_v3	576773	+	3504	0.211	-0.279	0.701	7.563	0.877	0.387	0.387	-5.864	histone-lysine N-methyltransferase SET7	SET7
2197	PF3D7_0823300	Pf3D7_08_v3	1028752	+	4763	0.183	-0.278	0.644	8.256	0.809	0.424	0.424	-5.973	histone acetyltransferase GCN5	GCN5
181	PF3D7_0113900	Pf3D7_01_v3	537109	-	917	-0.223	-0.785	0.34	5.574	-0.806	0.426	0.426	-5.733	Plasmodium exported protein (hyp8), unknown function	GEXP10
2945	PF3D7_1024800	Pf3D7_10_v3	1034685	+	4395	0.178	-0.282	0.638	10.923	0.787	0.437	0.437	-6.153	conserved Plasmodium protein, unknown function	NA
3769	PF3D7_1214200	Pf3D7_12_v3	607379	-	628	0.29	-0.476	1.055	2.286	0.769	0.447	0.447	-5.423	histone-lysine N-methyltransferase, putative	SET5
2676	PF3D7_0936500	Pf3D7_09_v3	1443854	-	994	-0.455	-1.704	0.793	1.497	-0.742	0.463	0.463	-5.39	virulence-associated protein 1	VAP1
1942	PF3D7_0731100	Pf3D7_07_v3	1338959	+	2832	0.143	-0.253	0.538	11.236	0.734	0.468	0.468	-6.223	EMP1-trafficking protein	PTP2
950	PF3D7_0425250	Pf3D7_04_v3	1138009	-	551	0.678	-1.344	2.7	-2.445	0.683	0.499	0.499	-5.167	Plasmodium exported protein (PHIST), unknown function, pseudogene	NA
4198	PF3D7_1301700	Pf3D7_13_v3	99548	+	974	0.147	-0.301	0.596	10.954	0.668	0.509	0.509	-6.232	Plasmodium exported protein (hyp8), unknown function	GEXP07
346	PF3D7_0214100	Pf3D7_02_v3	568529	-	4787	0.105	-0.233	0.444	10.009	0.633	0.531	0.531	-6.21	protein transport protein SEC31	SEC31
3188	PF3D7_1107800	Pf3D7_11_v3	329867	-	5735	0.238	-0.533	1.01	7.925	0.63	0.533	0.533	-6.096	transcription factor with AP2 domain(s)	ApiAP2
2671	PF3D7_0936000	Pf3D7_09_v3	1427642	-	381	0.114	-0.262	0.491	10.12	0.618	0.541	0.541	-6.211	ring-exported protein 2	REX2
2281	PF3D7_0831700	Pf3D7_08_v3	1365467	-	2040	0.202	-0.477	0.882	13.027	0.608	0.548	0.548	-6.39	heat shock protein 70	HSP70-x
3299	PF3D7_1118600	Pf3D7_11_v3	705556	-	1827	-0.113	-0.517	0.292	7.742	-0.567	0.575	0.575	-6.094	histone acetyltransferase	MYST
942	PF3D7_0424500	Pf3D7_04_v3	1110060	+	2234	-0.1	-0.464	0.265	8.614	-0.557	0.581	0.581	-6.164	serine/threonine protein kinase, FIKK family	FIKK4.1
5427	PF3D7_1449700	Pf3D7_14_v3	2038132	-	3411	-0.183	-0.866	0.499	5.98	-0.546	0.588	0.588	-5.934	exosome complex exonuclease RRP6	RRP6
2242	PF3D7_0827800	Pf3D7_08_v3	1198858	+	7200	-0.134	-0.664	0.396	8.691	-0.513	0.611	0.611	-6.195	SET domain protein, putative	SET3
2327	PF3D7_0902500	Pf3D7_09_v3	109334	-	1996	0.101	-0.311	0.514	8.647	0.5	0.62	0.62	-6.209	serine/threonine protein kinase, FIKK family	FIKK9.6
3090	PF3D7_1039100	Pf3D7_10_v3	1574060	+	1889	-0.334	-1.737	1.07	-0.205	-0.484	0.632	0.632	-5.422	DnaJ protein, putative, pseudogene	NA
5293	PF3D7_1436300	Pf3D7_14_v3	1479777	+	2982	0.086	-0.292	0.465	10.374	0.465	0.645	0.645	-6.326	translocon component PTEX150	PTEX150
3166	PF3D7_1105600	Pf3D7_11_v3	241184	-	2334	-0.106	-0.585	0.373	8.859	-0.45	0.656	0.656	-6.227	translocon component PTEX88	PTEX88
221	PF3D7_0202000	Pf3D7_02_v3	103385	-	2412	0.235	-0.845	1.316	12.919	0.447	0.658	0.658	-6.462	knob-associated histidine-rich protein	KAHRP
5643	PF3D7_1471100	Pf3D7_14_v3	2905163	-	1403	0.062	-0.315	0.439	8.57	0.334	0.741	0.741	-6.256	exported protein 2	EXP2
4891	PF3D7_1370300	Pf3D7_13_v3	2787972	+	942	-0.1	-0.758	0.558	10.421	-0.31	0.759	0.759	-6.376	membrane associated histidine-rich protein	MAHRP1
3610	PF3D7_1149000	Pf3D7_11_v3	1950210	+	18517	0.12	-0.788	1.029	5.625	0.27	0.789	0.789	-6.08	antigen 332, DBL-like protein	Pf332
951	PF3D7_0425300	Pf3D7_04_v3	1141222	+	875	-0.181	-1.749	1.387	-1.588	-0.235	0.816	0.816	-5.376	Plasmodium exported protein (PHISTa), unknown function, pseudogene	NA
2858	PF3D7_1016300	Pf3D7_10_v3	650898	-	2670	-0.236	-2.551	2.078	9.532	-0.209	0.836	0.836	-6.357	glycophorin binding protein	GBP
2407	PF3D7_0910000	Pf3D7_09_v3	452399	-	3345	-0.056	-0.607	0.495	3.979	-0.208	0.836	0.836	-5.927	SET domain protein, putative	SET4
735	PF3D7_0403900	Pf3D7_04_v3	219087	+	3752	0.109	-1.08	1.298	-1.072	0.186	0.854	0.854	-5.428	SET domain protein, putative	SET8
1334	PF3D7_0604100	Pf3D7_06_v3	171301	-	5940	0.102	-1.062	1.266	-1.129	0.178	0.859	0.859	-5.451	transcription factor with AP2 domain(s)	SIP2
3837	PF3D7_1221000	Pf3D7_12_v3	836912	-	6990	-0.097	-1.222	1.027	0.315	-0.176	0.861	0.861	-5.564	histone-lysine N-methyltransferase, H3 lysine-4 specific	SET10
3280	PF3D7_1116800	Pf3D7_11_v3	636094	-	3418	0.029	-0.362	0.421	10.214	0.153	0.879	0.879	-6.403	heat shock protein 101	HSP101
3896	PF3D7_1226900	Pf3D7_12_v3	1088536	-	1488	-0.049	-0.778	0.68	0.722	-0.136	0.893	0.893	-5.555	conserved Plasmodium protein, unknown function	NA
5717	PF3D7_1478600	Pf3D7_14_v3	3232639	+	3897	0.086	-1.218	1.389	6.182	0.134	0.894	0.894	-6.134	EMP1-trafficking protein	PTP3
1039	PF3D7_0508100	Pf3D7_05_v3	331680	+	5025	0.044	-0.698	0.786	1.282	0.121	0.904	0.904	-5.707	SET domain protein, putative	SET9
4535	PF3D7_1334700	Pf3D7_13_v3	1411100	-	609	0.029	-0.537	0.595	7.712	0.105	0.917	0.917	-6.252	MSP7-like protein	MSRP7
968	PF3D7_0501000	Pf3D7_05_v3	55841	+	1032	-0.02	-0.49	0.449	8.043	-0.088	0.931	0.931	-6.276	Plasmodium exported protein, unknown function	NA
1940	PF3D7_0730900	Pf3D7_07_v3	1325375	+	6439	-0.029	-0.868	0.811	9.134	-0.07	0.945	0.945	-6.358	EMP1-trafficking protein	PTP4
