# Supplementary material for: Gene expression profiling of malaria parasites reveals common virulence gene expression in adult first-time infected patients and severe cases
Source: bioRxiv preprint, doi:10.1101/2020.11.13.381137, version 3 (2021-03-23)
Supplement: Table S6 [file 381137_file23.xlsx]

## Sheet: rask domain
Transcript	Annotation 1	Annotation 2	Annotation 3	Annotation 4	Annotation 5	Annotation 6	Annotation 7	Annotation 8	Annotation 9	Annotation 10	Annotation 11
NS_L7_29_Contig7986_frame_-1	DBLd5,2,31,3.3e-06	CIDRb4,32,282,5.9e-115
S_L8_68_Contig6018_frame_-2	CIDRa1.2,17,60,6.1e-22	DBLb11,69,560,0.0	DBLg1,584,938,3.9e-214	DBLe1,957,1315,2e-214
NS_L6_21_Contig3455_frame_1	DBLe2,1,150,3.7e-68	DBLe7,162,245,3.2e-38
NS_L7_44_Contig6987_frm1_orf5	NTSA,11,86,3.5e-22	DBLa1.1,87,485,3.8e-239	CIDRa1.2,486,737,2.7e-181	DBLb11,746,1235,0.0	DBLg1,1259,1613,2.4e-211	DBLe1,1632,1690,5.1e-28
NS_L1_73_Contig35445_frame_-1	DBLpam3,1,324,1.3e-206	DBLepam4,325,359,6.9e-15
S_L7_20_39453_frame_2	CIDRb1,1,97,5.3e-32
NS_L8_54_Contig7929_frame_-2	DBLd1,1,408,2.5e-137	CIDRb1,411,658,1.4e-95	DBLe2,697,1039,9.2e-168	DBLe7,1051,1334,2.5e-148	DBLe3,1379,1552,4e-92
NS_L8_59_Contig5475_frm-1_orf3	NTSB,6,71,5.4e-17	DBLa0.13,73,141,2.8e-32
NS_L1_88_Contig7416_frame_1	DBLg4,1,303,3.8e-136	DBLd1,427,898,1.4e-158	CIDRb2,899,1148,1.1e-103	CIDRa3.1,1223,1242,6.9
NS_L6_24_Contig7907_frame_-1	DBLa0.16,1,164,3.1e-71	CIDRa3.4,165,322,1.1e-68
NS_L8_59_Contig6384_frame_3	DBLa0.15,1,200,3.6e-102	CIDRa3.2,201,367,1.2e-67
NS_L7_27_Contig4688_frm2_orf0	DBLb3,20,223,5.8e-65
NS_L7_19_Contig9525_frame_1	DBLa0.12,1,54,1.4e-16	CIDRa2.1,55,293,8.5e-100
NS_L6_21_Contig8434_frame_-1	DBLg12,1,42,2.8e-20	DBLd1,109,127,3.8	DBLd1,144,219,1.2e-16
S_L6_19_Contig12368_frame_3	CIDRb1,1,169,3.3e-69
NS_L1_88_Contig11535_frame_-3	DBLa0.1,1,33,1.8e-10	CIDRa3.1,34,184,1.5e-61
NS_L6_21_Contig12521_frame_1	CIDRa3.3,1,155,1.9e-70	CIDRa3.1,183,225,1.1	DBLd1,244,743,1e-167	CIDRb1,745,991,3.4e-93
NS_L7_29_Contig7950_frame_2	CIDRg12,1,145,3.8e-67
NS_L1_95_Contig9253_frame_-3	CIDRa2.5,1,139,2.8e-60	DBLd1,219,725,1.1e-165	CIDRb5,726,973,4.5e-115
NS_L1_95_Contig3127_frame_3	NTSB,22,72,5e-12	DBLa0.20,79,218,1.3e-59
NS_L6_18_Contig14788_frame_1	DBLd1,3,300,2.3e-104	CIDRg7,301,440,1.5e-65
NS_L8_59_Contig5581_frame_1	DBLa2,1,134,3.9e-63	CIDRa1.1,135,387,1.2e-145
NS_L8_65_Contig5571_frm-1_orf5	NTSB,12,64,4.8e-13	DBLa0.1,71,345,1.5e-124
NS_L8_54_Contig8338_frame_-1	DBLg12,2,174,2.8e-69
S_L7_20_Contig6330_frame_1	DBLb1,2,185,1.4e-93
NS_L7_17_Contig5348_frame_-2	DBLb7,1,442,4e-205
S_L8_68_Contig6808_frame_3	CIDRb1,1,224,2.6e-92	CIDRa2.2,264,295,19.0
NS_L1_80_Contig33401_frame_-3	CIDRb1,1,146,1.1e-57	CIDRa3.4,179,208,0.82
NS_L8_59_Contig5568_frame_3	CIDRa2.3,15,267,1.3e-116
S_L6_19_50212_frame_2	DBLd1,3,421,1.2e-144	CIDRb1,423,673,7.8e-103
NS_L7_32_Contig13829_frame_-3	DBLd4,9,190,5.9e-72
NS_L8_59_27328_frame_-3	NTSB,56,106,1.8e-14	DBLa0.15,116,396,1.4e-137
NS_L6_18_Contig14800_frm-2_orf5	NTSA,11,87,4e-23	DBLa1.1,88,486,1.4e-238	CIDRa1.2,487,738,1.6e-180	DBLb11,747,1238,0.0	DBLg1,1262,1616,2.5e-207	DBLe1,1635,1998,5.5e-186	DBLg8,2087,2458,2.3e-220	DBLz2,2472,2779,2.4e-158
NS_L8_59_Contig5572_frame_3	DBLd1,1,166,1.7e-60	CIDRb1,167,345,8.3e-73
S_L7_20_33508_frame_-3	DBLb3,1,465,9.6e-188	DBLb9,481,924,2e-181	DBLg11,944,1283,3.8e-142
NS_L6_24_Contig7649_frame_-2	DBLa0.13,2,31,0.00017	CIDRa2.3,32,298,1.9e-106	DBLd1,377,895,1.1e-166	CIDRb1,896,1142,1.2e-94
NS_L1_95_Contig9131_frame_3	CIDRb1,2,196,1.2e-84
S_L3_13_Contig7167_frame_1	NTSB,24,82,8.3e-15	DBLa0.5,86,343,3.7e-114
S_L8_68_Contig5815_frame_-1	DBLd4,24,198,6.3e-74
S_L7_42_Contig5437_frame_-2	NTSB,46,102,2.8e-15	DBLa0.3,103,412,3.6e-172
NS_L1_73_Contig35666_frame_2	NTSB,56,114,3.2e-12	DBLa0.3,115,508,7.3e-182	CIDRa5,509,759,5.8e-119	DBLb4,785,1245,2.4e-188	DBLg2,1260,1636,5.4e-152	DBLd5,1645,2070,1.4e-162	CIDRb4,2071,2320,1.6e-109	DBLz6,2358,2783,1.2e-202	DBLe6,2788,3106,1.4e-144
S_L7_16_27226_frame_2	CIDRa4,1,145,3.8e-70	DBLd3,218,709,6.1e-171	CIDRg2,710,965,1.5e-118	DBLe2,1013,1356,5.9e-172	DBLe7,1368,1642,1.1e-137	DBLe3,1685,1820,8.1e-72
S_L8_68_Contig3237_frame_3	CIDRa2.2,1,132,1.4e-55	DBLd1,226,654,1.6e-124
S_L7_42_Contig6031_frame_-2	DBLa2,3,393,1.8e-183	CIDRa1.8,394,647,6.5e-142	DBLb12,653,721,4.3e-20
NS_L6_21_Contig11164_frame_1	CIDRb1,3,220,1.9e-97
NS_L6_24_Contig8692_frame_-3	DBLa0.11,1,216,3.3e-106
S_L6_19_Contig12439_frame_-2	DBLa0.12,1,176,1.2e-75	CIDRa5,177,426,3.8e-116	DBLb5,450,768,4.2e-133
NS_L1_88_Contig15770_frame_-2	NTSB,17,73,6.6e-13	DBLa0.4,78,373,3.7e-134
NS_L7_19_Contig5910_frame_3	CIDRa4,1,265,2.8e-100	DBLd1,333,657,1.9e-86
NS_L8_51_Contig2312_frame_2	DBLa0.9,1,292,7e-136	CIDRa2.2,293,509,4.3e-100
NS_L1_80_Contig36107_frame_-1	CIDRb1,2,175,2.7e-76
S_L8_56_33521_frame_3	DBLg4,23,391,3.5e-165	DBLd1,526,693,7.1e-56
S_L8_68_Contig5943_frame_-1	CIDRb1,1,142,5.4e-57	CIDRa3.4,183,211,9.1
NS_L7_19_Contig9846_frame_-2	DBLd1,1,196,3.6e-69	CIDRb1,199,449,9.6e-87
S_L6_19_126527_frame_3	DBLa1.7,1,61,2.6e-23	CIDRa1.6,62,259,9.9e-95
NS_L8_59_Contig5606_frame_3	NTSB,38,90,1.9e-10	DBLa0.11,95,507,8.6e-195	CIDRa2.4,508,754,3.5e-108	DBLg5,818,1116,9.6e-134
S_L7_20_Contig3354_frame_3	NTSA,22,97,4.1e-26	DBLa1.2,98,236,6.8e-74
NS_L8_59_27644_frm1_orf3	NTSB,9,65,3.7e-16	DBLa0.12,68,485,1.9e-212	CIDRa2.1,486,738,1.1e-104	DBLb12,747,1114,1.9e-149
NS_L1_73_Contig35658_frame_-1	DBLa0.9,4,347,9.2e-166	CIDRa2.1,348,588,6.1e-108	DBLd1,670,987,3.7e-114
S_L7_20_Contig5757_frame_3	DBLa1.5,1,116,4e-63	CIDRd1,117,196,5.8e-38
NS_L8_50_Contig4193_frame_-2	DBLa1.3,2,230,1.6e-167	DBLe8,235,286,4.2e-23
NS_L1_88_Contig15734_frame_1	DBLa0.7,1,169,7.2e-69	CIDRa5,170,419,2.4e-115	DBLb5,438,653,6.2e-80
S_L7_20_Contig6536_frame_2	DBLd1,1,91,1.3e-27	CIDRb1,92,345,1.9e-103
NS_L6_24_Contig5820_frame_2	CIDRg1,1,61,8.2e-21
NS_L1_84_Contig9992_frame_-3	DBLb3,1,47,1.1e-12	DBLg5,64,256,5.7e-79
NS_L1_88_Contig17037_frame_1	DBLb8,1,42,9.4e-12	DBLd1,141,362,6.7e-69
NS_L6_24_Contig5394_frame_1	CIDRa1.1,1,195,1e-112
S_L7_20_33016_frame_-1	DBLa0.1,1,320,2.5e-166
S_L7_16_Contig4303_frame_-2	DBLd1,79,443,4.4e-111
NS_L1_80_Contig9593_frame_-1	NTSB,36,107,6.3e-16	DBLa0.9,108,171,7.2e-33
S_L7_20_33216_frame_-3	CIDRa3.2,3,263,1.8e-115	CIDRa3.1,293,313,20.0	DBLd1,346,440,3.2e-28
S_L8_68_Contig5969_frame_2	DBLd1,1,160,4.1e-62	CIDRg12,161,256,2e-39
S_L7_20_Contig6335_frame_3	DBLb3,4,186,1.6e-80
NS_L1_80_Contig33400_frame_-3	CIDRg4,1,158,1.6e-78
NS_L1_84_Contig8374_frame_3	DBLe4,15,222,1.9e-78
NS_L1_80_Contig32245_frame_1	DBLa1.1,2,32,1.6e-07	CIDRa1.4,33,283,1.8e-138	DBLb1,292,391,1.4e-46
NS_L8_59_Contig2319_frame_1	DBLb3,2,336,2.8e-146	DBLg13,351,717,3e-154	DBLg13,732,1099,8.1e-138	DBLd1,1240,1585,3e-116
NS_L1_80_Contig33598_frame_-1	DBLd1,2,318,2.5e-120	CIDRb6,320,478,4e-70
NS_L6_21_Contig12433_frame_3	DBLd1,1,327,1.6e-98
NS_L7_29_Contig7083_frame_1	DBLa0.1,1,277,1.4e-147
NS_L1_95_Contig7955_frame_-3	DBLa0.1,1,230,2e-111
NS_L7_19_Contig5715_frame_2	DBLa0.12,1,334,1.2e-163	CIDRa2.2,335,579,9.5e-110	DBLd1,679,1036,8.9e-112
NS_L1_84_100612_frame_3	DBLg6,1,232,1.3e-95	DBLd4,240,371,5.4e-37
NS_L6_18_Contig14787_frame_-2	NTSB,3,60,8e-14	DBLa0.9,63,439,8.4e-192
S_L3_13_Contig6074_frame_-2	DBLa0.5,8,270,1.5e-140	CIDRa2.6,271,578,1.5e-132
S_L3_13_Contig5997_frm2_orf5	NTSB,16,71,1.2e-11	DBLa0.3,73,260,1.8e-102
NS_L8_51_Contig6302_frame_-1	DBLa0.10,35,409,5.8e-195	CIDRa2.2,410,506,2.1e-38
NS_L7_17_Contig4158_frame_2	DBLb5,1,227,3.9e-95	DBLd1,343,816,7e-159	CIDRb5,817,1059,9.6e-105
NS_L1_95_Contig6801_frame_3	NTSB,27,88,1.6e-12	DBLa0.11,94,354,1.9e-123
NS_L7_27_Contig2230_frame_3	DBLa1.8,1,323,1e-158
NS_L7_29_Contig7939_frm-3_orf3	NTSB,6,63,5e-14	DBLa0.5,65,206,2.7e-67
NS_L1_84_Contig10103_frame_-2	DBLa0.16,1,103,1.2e-31	CIDRa3.4,104,415,1.4e-118	DBLd1,488,869,1.3e-117
NS_L8_59_27480_frame_2	DBLd1,1,151,1.1e-58	CIDRb3,153,408,8.9e-112
NS_L8_50_Contig7616_frame_1	CIDRb3,1,180,2.4e-82	DBLg11,191,246,10.0
S_L7_20_Contig5286_frame_2	CIDRb1,1,137,1.3e-53
S_L8_56_Contig2555_frame_-1	DBLg7,1,126,4.6e-55	DBLe11,133,254,2.8e-49
S_L7_42_Contig2208_frm2_orf6	NTSB,13,67,2.9e-12	DBLa0.4,73,336,4.1e-151
NS_L7_17_Contig4175_frame_1	DBLd1,1,80,1.2e-16	CIDRb6,94,245,8.5e-68
S_L8_56_101559_frame_-1	DBLpam1,1,155,1.3e-82	CIDRa2.8,181,233,4.6	DBLpam2,245,704,3.6e-258	CIDRpam,713,941,1.9e-147	DBLpam3,960,1327,4.6e-239	DBLepam4,1328,1672,5.3e-231	CIDRpam,1707,1746,39.0	DBLepam5,1750,2049,6e-191	DBLe10,2096,2196,6.2e-60
S_L8_68_Contig3141_frame_-3	DBLg9,1,141,3.5e-53
S_L8_68_Contig1970_frame_-2	DBLa0.4,14,341,4.7e-163
NS_L7_29_Contig3243_frame_1	CIDRa6,2,213,1.3e-86	DBLb5,234,721,1.6e-195	DBLg3,736,1112,2.3e-156	DBLz4,1121,1291,1.4e-70
NS_L6_18_Contig15989_frame_-1	DBLd5,1,297,1.5e-135
NS_L6_18_Contig15105_frame_2	DBLd1,6,285,9.3e-101	CIDRb1,286,373,1.1e-29
NS_L8_55_Contig5863_frm2_orf0	DBLepam4,1,155,8.4e-107	DBLb13,169,217,16.0	DBLepam5,233,540,9.2e-198	DBLe10,587,888,1.1e-160	CIDRa5,1044,1110,0.31	DBLz4,1146,1216,3.0
S_L7_20_Contig6181_frame_3	DBLa0.12,1,182,9.3e-81	CIDRa2.2,183,429,1.6e-108	DBLd1,537,1060,5.5e-168	CIDRg1,1061,1209,1.9e-69
S_L8_56_Contig1969_frm1_orf0	DBLa0.9,2,116,9.5e-52
NS_L1_95_Contig8060_frame_1	NTSA,9,84,1.1e-21	DBLa1.1,85,482,1.3e-239	CIDRa1.2,483,734,4.1e-181	DBLb11,743,1234,0.0	DBLg1,1251,1551,9.3e-165
S_L8_56_Contig4566_frame_1	NTSB,55,127,1.1e-16	DBLa0.1,136,573,2.5e-208	CIDRa3.3,574,871,1e-125	CIDRa3.1,896,920,12.0	DBLd1,965,1190,6e-65
S_L8_68_Contig4197_frame_3	DBLd1,2,261,5.4e-84
NS_L8_65_Contig5579_frame_1	CIDRa5,2,233,3e-87	DBLb5,252,725,4.3e-198	DBLg2,740,1124,4.6e-161	DBLd4,1133,1542,1e-163	CIDRg1,1543,1794,1.1e-87	DBLe4,1838,2160,1e-136
S_L7_42_Contig6295_frame_3	DBLb5,1,125,4.8e-38	DBLd1,142,599,3.4e-156	CIDRg1,600,835,3.2e-105	DBLg3,883,1258,4.4e-148	DBLz4,1267,1686,1.2e-212
NS_L1_88_49720_frame_-2	CIDRa3.2,2,177,4.7e-83
S_L3_13_Contig6981_frame_-1	DBLg9,1,144,3.1e-63
NS_L7_19_Contig6754_frame_3	CIDRb1,18,266,9.3e-111
NS_L6_20_Contig16267_frame_1	DBLa0.17,1,200,4.2e-101	CIDRa3.1,201,522,1.3e-131	DBLd1,608,690,6.6e-17
NS_L8_59_Contig5842_frame_3	DBLb3,1,343,1.4e-118	DBLg11,406,759,2.5e-135
S_L7_16_26954_frame_-1	DBLa0.17,1,322,4.2e-181
NS_L7_29_31289_frame_-3	DBLb1,3,166,1.8e-57	DBLb3,182,624,2e-186
NS_L1_88_54374_frame_-1	DBLb8,1,182,8.4e-73	DBLb5,221,674,4.7e-185	DBLd1,795,1296,5.2e-172	CIDRb1,1300,1548,2.6e-96
S_L3_13_Contig7200_frame_1	DBLd5,18,100,5.9e-22	CIDRb1,103,346,3.5e-92
NS_L8_50_Contig7661_frame_-1	DBLa0.4,1,401,4.6e-198	CIDRa6,402,652,1.3e-118	DBLb5,669,1122,3.3e-198	DBLd1,1141,1612,2.7e-165	CIDRb1,1613,1862,5.6e-103
S_L3_13_Contig7235_frame_3	DBLg13,4,277,7.8e-101	DBLz2,291,705,9.1e-184	DBLe4,712,1028,9.9e-132
S_L7_20_Contig341_frame_1	DBLb5,2,225,3.2e-96	DBLg6,245,602,2.5e-140	DBLd1,742,1241,4.7e-164	CIDRb1,1242,1370,2.9e-56
S_L3_13_Contig6318_frm1_orf43	DBLg13,2,120,3.2e-41
NS_L7_29_Contig7294_frame_-2	DBLa0.1,7,134,3e-37	CIDRa3.1,135,460,3.2e-130	DBLb5,482,940,2e-199	DBLg10,957,1326,3e-142	DBLd5,1347,1748,1.7e-178	CIDRb4,1749,2004,2e-103
S_L8_56_Contig2636_frame_-1	CIDRb1,1,254,1.9e-107
NS_L7_29_Contig2112_frm1_orf0	DBLb3,15,194,7.9e-63
NS_L1_84_31566_frame_-2	DBLa0.11,1,174,6.7e-86	CIDRa2.4,175,434,7.8e-122	DBLd1,535,1058,2.2e-164	CIDRg2,1059,1311,7.4e-65
NS_L1_80_Contig33359_frame_1	DBLd1,18,322,5.9e-100
NS_L7_29_31331_frame_2	DBLg12,2,235,2.6e-93	DBLd5,240,635,2.2e-187	CIDRb2,636,697,1.9e-14
NS_L1_95_Contig9209_frame_-1	NTSB,22,73,9.5e-13	DBLa0.1,76,334,5.4e-119
S_L8_56_Contig6225_frame_-2	CIDRa2.5,4,188,7.4e-71	DBLd1,275,367,3.2e-26
S_L7_20_Contig3922_frm3_orf2	DBLb3,21,224,6.4e-65
S_L7_20_Contig5289_frame_-1	CIDRa2.1,2,44,1.4e-11	DBLd1,121,246,3.6e-25
S_L7_20_Contig6418_frame_1	CIDRb3,1,117,3.9e-48	CIDRb7,128,174,12.0
S_L7_42_Contig6172_frame_3	CIDRb1,1,193,7.3e-82
NS_L1_95_Contig3467_frame_3	DBLd1,1,85,1.8e-19	CIDRb1,86,343,3.1e-112
NS_L8_55_Contig5862_frame_-3	DBLa0.5,2,449,2.6e-215	CIDRa2.2,450,706,4.9e-103	DBLd1,772,1177,1.5e-125
NS_L1_84_Contig10109_frame_-3	NTSB,34,93,1.7e-14	DBLa0.16,95,530,1e-212	CIDRa3.4,531,835,4.6e-131	DBLd1,929,1402,2.6e-165	CIDRb1,1403,1657,1.8e-103
NS_L7_29_Contig2112_frm3_orf51	DBLe4,1,162,1.2e-36
NS_L7_32_Contig11280_frame_-1	DBLd1,1,196,1.1e-58
NS_L8_59_Contig6434_frame_-3	DBLa0.14,1,183,1.3e-94	CIDRa4,184,447,4.8e-120	DBLg2,490,896,6.2e-127	DBLd1,925,1424,2.5e-171	CIDRb1,1425,1679,7.7e-109
NS_L6_20_52605_frame_-2	NTSB,11,68,1.5e-14	DBLa0.5,71,341,4.7e-129
NS_L1_95_Contig3046_frame_-3	DBLb2,3,197,1.1e-100
NS_L7_29_Contig7159_frame_2	DBLa0.17,1,221,6.4e-109	CIDRa3.1,222,390,5.7e-74
S_L7_42_Contig1427_frame_-2	DBLd1,2,467,8.4e-159	CIDRb1,468,736,6.4e-110	DBLz5,1194,1237,0.67
S_L6_19_65316_frame_2	DBLb8,7,321,3.2e-133	DBLg4,339,700,7.2e-152
NS_L8_51_Contig6948_frame_-2	NTSB,49,116,9.8e-17	DBLa0.8,117,468,2.2e-178
NS_L1_80_102341_frame_-3	NTSB,17,85,5.3e-16	DBLa0.9,86,331,3.7e-124
S_L7_42_Contig6285_frame_3	DBLb12,1,187,9.6e-86	DBLe2,256,599,5.7e-163	DBLe7,611,893,1.2e-121	DBLe3,936,1237,4.9e-160
S_L8_68_Contig6734_frame_-3	DBLg5,1,90,3.8e-35	DBLd1,132,354,1.4e-64
NS_L7_29_86610_frame_1	CIDRg11,2,73,7.8e-19
NS_L7_29_Contig7169_frame_-1	CIDRa1.5,1,151,1.8e-76	DBLb3,167,490,2.3e-127
NS_L7_29_Contig3358_frm2_orf57	DBLa0.1,5,142,1.6e-49	CIDRa3.1,143,255,8.9e-29
S_L7_42_Contig5941_frame_-1	DBLd4,1,163,1.1e-68	CIDRg1,164,429,7.9e-98
NS_L6_20_Contig16231_frame_3	CIDRb5,1,172,2.1e-75
S_L7_20_Contig5212_frame_-2	DBLd4,1,101,1.5e-32	CIDRg4,102,227,9.7e-60
S_L7_20_Contig5334_frame_3	CIDRa2.3,1,133,5.3e-51	DBLd2,174,217,2.7	DBLd1,238,322,1.4e-29
S_L7_20_Contig5384_frame_-1	NTSB,40,94,6.2e-12	DBLa0.4,97,507,1.5e-190	CIDRa6,508,759,4.9e-94	DBLd1,839,913,8.4e-17
NS_L7_35_Contig4670_frm-1_orf0	DBLd5,4,221,1.9e-95
S_L8_68_Contig4326_frame_1	NTSB,40,108,3.6e-17	DBLa0.5,112,225,9e-48
NS_L6_18_Contig11248_frame_-2	DBLe4,9,213,9.3e-81
NS_L6_21_43643_frame_2	DBLd1,9,300,4.9e-99	CIDRg8,301,566,1.2e-115
NS_L1_95_Contig9259_frame_-2	DBLa0.16,4,179,1.9e-85	CIDRa3.4,180,497,4.8e-119	DBLb8,525,623,2.1e-27
NS_L1_88_Contig11786_frm-3_orf0	CIDRb5,1,114,2e-40
NS_L7_32_Contig14846_frame_-2	CIDRa2.4,3,254,8.1e-118	DBLd1,330,674,8.8e-121
NS_L7_19_Contig9667_frame_-1	DBLa0.5,1,129,4.3e-52	CIDRa2.6,130,194,2.6e-26
NS_L1_80_Contig12000_frm-2_orf0	DBLg4,1,266,1.1e-102	DBLz2,280,697,1.2e-157	DBLe11,699,1028,3.9e-131	DBLe3,1065,1374,2.6e-143
NS_L7_19_Contig9885_frame_1	DBLd4,3,16,2.0	CIDRg2,17,278,2.9e-122
NS_L1_80_Contig33538_frame_1	DBLa0.1,1,213,6.5e-99	CIDRa3.1,214,516,1.2e-125	DBLd1,610,977,8.1e-111
S_L7_20_Contig5347_frame_2	NTSB,28,140,6.5e-21	DBLa0.12,141,566,9e-203	CIDRa2.1,567,810,1.1e-103	CIDRa3.1,830,878,2.1	DBLd1,938,1377,2e-158
NS_L7_32_Contig13937_frame_-3	CIDRa3.2,1,104,4.6e-39	DBLd1,190,765,1.7e-173	CIDRb1,766,1014,4.8e-100
S_L8_68_Contig3125_frm3_orf6	DBLe1,22,126,1.6e-35
NS_L7_27_Contig2001_frame_3	CIDRa1.4,8,113,5.9e-57	DBLb3,122,198,6.7e-22
NS_L6_20_Contig17204_frame_-2	DBLa0.19,1,63,3.4e-22	CIDRa3.4,64,166,9.9e-39
NS_L6_18_Contig14695_frame_3	CIDRb1,1,184,4e-77
S_L7_20_Contig6524_frame_2	CIDRb1,2,224,1e-94
NS_L1_80_Contig21795_frame_3	CIDRa1.1,1,141,8e-77	DBLb4,150,590,3.4e-173	DBLg14,656,1045,2.1e-179	DBLz5,1054,1484,1.3e-210	DBLe4,1490,1700,1.2e-76
NS_L7_35_Contig5583_frame_3	CIDRb6,1,126,3.6e-53
NS_L8_51_Contig3284_frame_-3	DBLg3,19,394,7.9e-163	DBLz4,403,661,5e-126
NS_L7_17_Contig5060_frm-1_orf0	DBLb6,1,302,8.2e-143	DBLg4,312,660,9.5e-142	CIDRa3.1,765,786,7.2
NS_L1_95_Contig9044_frame_-3	CIDRg1,1,157,2e-70
NS_L1_80_Contig21326_frame_1	DBLd1,2,266,4.1e-97	CIDRg9,267,535,6.5e-134
S_L7_20_Contig6441_frame_-2	NTSB,52,124,4.4e-20	DBLa0.12,125,250,7e-60
NS_L8_50_Contig3872_frame_3	CIDRb1,2,248,2.1e-83	CIDRa3.1,257,297,10.0
NS_L7_27_Contig6121_frm2_orf3	NTSB,14,71,1.9e-10	DBLa0.3,75,483,7.3e-190	CIDRa5,484,733,3.4e-116	DBLb4,755,1198,6.4e-174	DBLg13,1217,1603,4.9e-139	DBLe4,1640,1945,1.5e-118
NS_L1_73_286889_frame_3	DBLg3,1,106,1.7e-50	DBLz1,115,527,3.1e-184	DBLe5,534,719,1.3e-104
NS_L7_35_Contig2482_frm1_orf15	NTSA,11,89,1.7e-22	DBLa1.4,90,485,4.6e-219	CIDRa1.3,486,737,9.4e-184	DBLb1,746,1227,2e-266	DBLg15,1247,1593,8.2e-209	DBLe1,1611,1947,3.4e-188	DBLg8,2058,2433,9.6e-230	DBLz1,2457,2877,6.2e-270	DBLe5,2884,3208,2.2e-204
NS_L1_84_Contig8069_frame_-2	CIDRg10,1,177,1.5e-84
NS_L7_17_23732_frame_1	DBLd1,1,83,3.1e-17	CIDRb1,84,291,8.7e-86
NS_L8_65_Contig5580_frame_1	NTSB,64,107,3.4e-08	DBLa0.18,115,521,1.8e-193	CIDRa4,522,790,1.9e-112	DBLb5,811,1256,1.8e-175	DBLg2,1270,1643,3e-136
NS_L7_27_Contig7028_frame_2	DBLd1,1,315,8.3e-110	CIDRb7,316,418,3.6e-36
S_L3_13_Contig1989_frame_1	NTSB,35,89,1e-16	DBLa0.5,104,340,7.3e-98
NS_L1_80_Contig33183_frame_3	DBLd1,118,190,9.3e-22
S_L8_56_Contig1695_frm-2_orf3	NTSB,8,122,1.6e-27	DBLa2,131,529,2.2e-179	CIDRa1.1,530,781,2.6e-146	DBLb12,790,1246,5.9e-217	DBLg18,1262,1292,0.077	DBLg6,1296,1653,7.2e-139	CIDRa3.1,1719,1796,2.7	DBLd1,1837,2327,1.5e-166	CIDRb5,2328,2447,1.3e-54
S_L7_16_Contig5070_frame_1	DBLd1,1,295,1.9e-100
NS_L6_21_Contig10948_frame_2	DBLb8,2,45,5.9e-16	DBLg13,66,191,1e-47
NS_L6_24_Contig6786_frame_-1	DBLd1,1,64,4.9e-12	CIDRb1,65,179,4.2e-46
S_L8_68_Contig6577_frame_3	DBLg14,4,231,5.9e-132	DBLz5,240,261,0.00022
NS_L6_20_Contig17440_frame_-3	CIDRa2.4,1,147,7.2e-72	DBLd1,239,726,1.2e-163	CIDRb5,728,971,6e-109
NS_L1_84_Contig9270_frame_-3	DBLd1,1,161,5.9e-53	CIDRb3,163,411,3.6e-93	DBLb3,413,463,7.9
NS_L1_84_31554_frame_-3	CIDRa2.5,2,221,3.4e-86	DBLd1,305,819,1.3e-167	CIDRb1,820,1072,1.4e-96
S_L7_20_Contig6458_frame_3	CIDRb1,1,149,9.6e-57
NS_L6_21_Contig9856_frame_2	CIDRg4,1,97,8e-28	CIDRb1,117,164,2.0
NS_L8_54_Contig9534_frame_2	CIDRg5,2,96,2.4e-25
NS_L7_29_Contig7994_frame_2	DBLd1,1,99,1.1e-32	CIDRg8,100,356,1e-114
S_L7_20_Contig1832_frame_2	NTSA,25,89,1.6e-22	DBLa1.7,97,491,1.2e-193	CIDRa1.7,492,743,4.5e-127	DBLb1,752,789,1.5e-06
NS_L1_84_Contig9256_frame_2	DBLa0.11,4,198,1.7e-84
NS_L6_24_Contig8726_frame_-3	CIDRb1,1,169,8.5e-75
NS_L1_80_104167_frame_2	DBLd4,2,29,3.3e-07	CIDRg1,30,283,2.1e-122
NS_L7_35_Contig6337_frame_1	NTSB,50,112,6.6e-14	DBLa0.9,121,367,2.6e-127
NS_L6_21_Contig12495_frame_2	DBLb9,1,108,7e-39	DBLg10,122,495,1.4e-140
S_L6_19_48730_frame_2	NTSB,24,88,7.5e-16	DBLa0.9,97,227,3.5e-70
NS_L7_27_Contig6092_frame_-2	NTSB,5,54,5e-14	DBLa0.12,57,381,2.4e-161
NS_L7_32_Contig11360_frame_2	DBLa0.16,1,137,1.1e-62	CIDRa3.4,138,471,1.8e-140	CIDRa3.1,498,532,4.5	DBLd1,552,924,1.7e-121
S_L7_42_69238_frame_3	DBLd1,1,229,1.7e-75
S_L8_68_Contig6801_frame_-1	DBLd1,1,337,1.2e-101
NS_L7_19_Contig9769_frame_-3	CIDRa2.4,5,85,3e-27	DBLd1,180,556,1.2e-111
NS_L7_44_Contig10172_frame_-1	DBLb5,1,179,1.9e-78
NS_L7_35_Contig5513_frame_2	CIDRa3.1,1,141,1.7e-55
NS_L7_32_Contig14688_frame_3	DBLg2,3,169,2.2e-64
NS_L7_27_Contig7059_frame_2	DBLa0.1,1,121,2.5e-47	CIDRa3.2,122,415,5.9e-131	DBLd1,493,966,1.1e-167	CIDRb1,967,1219,1.5e-106
S_L8_56_Contig6367_frame_-2	DBLa0.21,1,41,9.3e-19	CIDRa2.1,42,292,1e-119	DBLb2,310,525,7.1e-121
S_L7_16_27170_frame_-1	DBLb6,1,76,1.2e-30	DBLg2,91,484,2.1e-165	DBLg4,500,847,8.2e-135
S_L7_20_Contig6584_frame_-2	DBLa0.12,1,155,1.4e-66	CIDRa2.2,156,412,5.3e-107	DBLd1,496,1019,1.6e-170	CIDRb5,1021,1058,0.0011
S_L7_16_Contig1649_frm3_orf8	NTSA,11,87,1.3e-23	DBLa1.1,88,486,4.8e-239	CIDRa1.2,487,704,1.2e-157
NS_L1_95_Contig9241_frm-3_orf28	CIDRa2.7,22,127,2.8e-35	DBLd1,221,716,4.5e-167	CIDRb1,718,854,6.3e-59
NS_L8_59_Contig5532_frame_2	CIDRa1.4,1,143,6.4e-83	DBLb12,152,247,5.3e-31
NS_L8_50_Contig5466_frame_2	DBLe6,1,160,4.2e-85
NS_L7_27_Contig6996_frame_-1	CIDRb3,1,143,1.5e-49
NS_L7_29_Contig7906_frame_3	CIDRa3.2,1,153,3e-63	CIDRa3.1,188,208,2.0
NS_L7_32_Contig9247_frm3_orf5	NTSA,14,82,5.4e-23	DBLa1.2,86,477,6.6e-194	CIDRa1.5,478,644,1.7e-67
S_L8_56_33605_frm2_orf0	DBLa0.16,1,135,1e-60	CIDRa3.4,136,400,5e-127
NS_L8_65_Contig5585_frame_2	CIDRa3.1,1,169,1.3e-74	CIDRa3.1,215,248,8.7	DBLd1,267,819,2.1e-171	CIDRb5,820,1064,2.6e-112
NS_L1_95_Contig3432_frame_1	DBLb3,2,128,1.4e-43	DBLg4,144,323,9.6e-84
S_L7_20_Contig6489_frame_-2	CIDRb1,1,158,7.8e-71
NS_L1_95_Contig8063_frame_2	DBLd4,1,19,0.00084	CIDRg1,20,287,7.8e-107	DBLe12,332,660,3.1e-117
NS_L6_18_Contig14587_frame_-3	DBLd5,56,181,5.3e-56
NS_L8_50_Contig5424_frame_3	DBLd1,1,489,6e-165	CIDRb1,490,741,8.2e-110
NS_L1_73_Contig29054_frame_-3	CIDRa2.2,2,224,2.6e-106
NS_L8_60_Contig9519_frm-3_orf4	NTSA,11,88,7.8e-23	DBLa1.4,89,484,6e-220	CIDRa1.3,485,688,2.2e-150
S_L8_56_33637_frame_1	NTSA,18,59,1.7e-08	DBLa1.6,60,448,2.7e-189	CIDRg3,449,698,3.6e-98	DBLb6,718,803,8.7e-13	DBLg12,891,1255,1.8e-166	DBLd5,1260,1666,7.4e-191	CIDRb3,1667,1920,2.7e-114	DBLb7,1956,2400,1.7e-191
NS_L1_80_Contig22772_frame_3	DBLa0.4,1,181,1.5e-79
NS_L7_35_Contig6343_frm-3_orf3	NTSB,8,71,6.8e-17	DBLa0.1,76,334,5.2e-121
NS_L7_44_Contig6045_frame_-2	DBLg12,1,114,1.5e-52	DBLd5,119,244,8.5e-59
NS_L1_80_Contig35694_frame_-3	NTSB,23,79,1.1e-13	DBLa0.5,87,176,2.2e-38
NS_L1_84_Contig9287_frame_-1	DBLz4,1,162,1.7e-93
NS_L1_84_42818_frame_1	CIDRg10,2,181,2.5e-86
S_L3_13_Contig2295_frame_1	CIDRb1,3,159,6.3e-65	CIDRa3.4,193,259,14.0
NS_L1_73_Contig37677_frame_2	DBLd1,14,418,1.7e-143	CIDRb6,420,480,2.6e-16
NS_L6_24_Contig5933_frame_3	DBLa0.15,1,185,1.5e-80	CIDRa3.1,186,496,5.8e-128	DBLd1,578,1099,1.2e-169	CIDRb1,1100,1346,1.1e-97	DBLg3,1361,1399,9.5
NS_L6_18_Contig9047_frm-3_orf12	DBLb1,4,82,2.6e-25
S_L3_13_Contig6052_frame_-2	DBLa0.15,3,264,3.1e-125	CIDRa3.2,265,564,6.2e-126	DBLd1,651,1130,6.6e-158	CIDRb1,1131,1372,1.3e-107
NS_L6_21_Contig11171_frame_2	DBLa0.5,1,323,1.2e-153	CIDRa2.6,324,354,2.4e-06
S_L7_20_Contig5132_frame_3	DBLa1.2,1,301,1.2e-143	CIDRa1.6,302,551,6.3e-141	DBLb12,560,1012,3.6e-197	DBLg6,1114,1489,2.7e-157	DBLd1,1621,2090,6.4e-159
NS_L1_95_Contig3422_frm-1_orf0	CIDRg4,1,40,6.7e-09
NS_L8_54_Contig9566_frm-1_orf2	NTSA,16,59,9.3e-12	DBLa0.18,66,171,6.8e-52
NS_L8_50_Contig7608_frm-1_orf0	NTSB,3,52,4.8e-12	DBLa0.3,58,298,7e-138
NS_L7_32_Contig13379_frame_3	DBLb12,1,81,4.7e-31	DBLg11,100,288,1.1e-76
NS_L8_65_Contig5064_frame_-3	DBLd1,2,190,6.9e-72
S_L3_13_Contig7237_frame_3	DBLb8,4,302,3.3e-125	DBLd1,320,800,2.1e-157	CIDRb6,801,1045,1.8e-106
NS_L1_95_Contig9218_frame_-2	CIDRb1,13,260,2.2e-106	DBLg13,316,590,2.6e-113
NS_L1_95_Contig7974_frame_3	CIDRg4,2,221,2.3e-103
S_L8_56_33595_frame_-3	DBLa0.16,2,124,8.9e-56	CIDRa3.4,125,429,1.3e-140	DBLd1,518,978,2.7e-161	CIDRb7,979,1230,1.9e-116
S_L7_42_Contig5428_frame_2	DBLa2,1,47,8.8e-17	CIDRa1.7,48,298,6.6e-128	DBLb1,307,340,3.9e-05
NS_L7_19_Contig9601_frame_2	DBLd1,1,188,1.1e-56
S_L6_19_Contig12460_frame_-2	DBLpam1,1,116,3.8e-57	DBLpam2,216,651,8.7e-263	CIDRpam,660,887,2e-135	DBLpam3,906,1271,1.6e-235	DBLepam4,1272,1617,4.4e-234	DBLb13,1629,1679,3.7	DBLepam5,1695,1999,4.3e-196	DBLe10,2046,2299,1.9e-134
NS_L7_32_Contig12622_frame_2	DBLd1,2,264,2.8e-89	CIDRb5,265,512,7.3e-104
NS_L1_95_Contig4499_frame_-3	DBLg1,5,90,1.4e-51	DBLe1,109,466,2.3e-202	DBLg8,561,930,1.1e-214	DBLz2,944,1367,4.2e-217	DBLe5,1373,1581,4.1e-106
S_L8_56_Contig6073_frame_1	DBLb1,1,90,1.5e-28	DBLg11,117,168,1.3e-16
NS_L1_80_Contig23406_frame_-2	DBLg10,2,47,9e-12	DBLg11,181,215,5.1
NS_L8_54_Contig9641_frame_-2	DBLd1,2,454,3.5e-162	CIDRb1,455,699,2.5e-99
NS_L1_80_Contig35807_frame_-1	DBLa0.11,1,108,6.8e-43	CIDRa2.4,109,230,5e-48
S_L8_68_Contig4461_frame_3	DBLa1.2,1,126,1.1e-48	CIDRa1.4,127,340,1.3e-101
NS_L7_17_23972_frm3_orf14	CIDRa3.2,2,109,1.2e-33	DBLd1,176,681,4.3e-177	CIDRg7,682,812,7.6e-63
S_L7_42_Contig4316_frm1_orf12	NTSA,5,78,1.6e-22	DBLa1.1,79,227,1.2e-66
NS_L8_59_27398_frame_-2	DBLd1,1,84,8.2e-27	CIDRb1,85,339,7.1e-108
NS_L1_84_Contig9213_frame_2	CIDRb1,3,58,8.5e-13
NS_L8_59_Contig6421_frame_3	DBLa0.20,1,347,3.4e-150	CIDRa3.1,348,671,1.9e-125	DBLd1,761,1094,3.7e-94
S_L7_20_Contig3327_frame_-3	DBLa0.1,1,204,2.6e-102	CIDRa3.1,205,502,1e-126	DBLd1,593,1089,6.2e-172	CIDRb1,1090,1341,3.8e-102
S_L8_68_Contig4465_frm1_orf0	DBLe9,1,164,8.1e-73
NS_L8_54_Contig9618_frame_2	DBLd1,18,328,9.2e-114
NS_L1_88_166787_frame_-3	DBLpam2,3,323,1.1e-197	CIDRpam,332,559,1e-143	DBLpam3,578,629,7.1e-29
NS_L1_73_Contig25585_frame_3	DBLd5,1,271,4.8e-114	CIDRb3,275,521,1.1e-103	DBLe4,580,901,5.1e-142
NS_L1_95_Contig9037_frame_3	DBLepam5,1,50,1.1e-19	DBLe10,97,177,3.1e-46
S_L7_20_Contig3408_frame_1	DBLd1,1,247,7.9e-85	CIDRg2,248,504,1e-114	DBLz6,544,994,5.6e-202	DBLe6,999,1318,4.2e-152
S_L7_16_Contig1605_frm-1_orf12	DBLb1,4,82,2.6e-25
NS_L7_27_Contig2716_frame_3	CIDRa1.5,1,214,2.2e-102	DBLg12,249,607,9.7e-163	DBLd5,612,1022,3.1e-187	CIDRb3,1023,1135,2.8e-44
S_L3_13_Contig7195_frm3_orf0	DBLb8,9,73,2.7e-24	DBLd1,183,461,1.1e-84
NS_L8_55_71548_frame_1	DBLd1,88,199,7.3e-33
S_L6_19_Contig7160_frm3_orf22	DBLe7,136,236,5e-12
NS_L6_21_Contig12059_frame_-1	DBLe7,1,236,8.5e-119	DBLe3,280,341,5.5e-23
NS_L1_80_Contig35957_frame_-2	CIDRb5,2,113,3.8e-51
S_L3_13_45835_frame_-1	DBLa0.18,1,99,4.1e-38	CIDRa6,100,222,2.5e-55
NS_L1_95_37719_frame_-3	DBLa0.22,5,73,2.9e-25	CIDRa3.3,74,357,7.9e-121	DBLd1,437,973,2e-167	CIDRb1,975,1089,3.2e-43
S_L7_20_Contig6453_frame_3	CIDRb6,1,139,4.5e-62
NS_L8_65_Contig4969_frame_2	DBLa0.11,1,157,3.9e-71	CIDRa2.4,158,412,2.9e-117	DBLd1,490,849,2.4e-111
NS_L8_65_25194_frame_-1	NTSB,21,86,5.1e-11	DBLa0.22,88,560,2.7e-214	CIDRa3.1,561,811,1.2e-103
NS_L7_29_Contig7167_frame_-2	DBLd1,1,124,4.2e-36	CIDRb5,129,373,1.1e-106
NS_L1_88_Contig11633_frame_2	DBLd4,1,209,2.1e-73
NS_L6_18_Contig10917_frame_-3	DBLb5,1,198,1.3e-89	DBLg10,215,243,0.0061
S_L6_19_125563_frame_2	CIDRa2.8,1,115,1.2e-28
NS_L6_21_43041_frame_3	DBLd1,1,88,2.7e-23	CIDRb1,89,347,4.3e-110
NS_L7_19_Contig8777_frame_-1	DBLz2,2,322,3.1e-157	DBLe4,329,436,1.4e-46
NS_L8_59_Contig2299_frm-2_orf0	NTSB,3,55,4.6e-15	DBLa0.17,68,315,1.2e-99
NS_L1_80_Contig14433_frame_1	DBLg3,1,89,9.3e-43	DBLz4,98,318,4.4e-107
NS_L6_21_Contig12484_frame_2	CIDRa3.3,1,170,3.6e-75	DBLd1,261,734,6.7e-152	CIDRb1,735,991,1.1e-101
S_L7_20_Contig6595_frame_-3	DBLa0.22,1,149,8e-60	CIDRa3.2,150,454,4.4e-123	DBLb5,474,936,3.7e-201	DBLg16,954,1294,2.1e-148	DBLd1,1332,1783,2.7e-144
NS_L8_55_Contig2211_frame_1	DBLpam2,1,232,2e-132
NS_L8_51_Contig7805_frame_-3	NTSB,36,92,3e-14	DBLa0.15,94,540,1.3e-191	CIDRa2.5,541,857,7e-107	DBLd1,944,1449,1.4e-161	CIDRb1,1450,1709,1.2e-108
S_L8_56_Contig1830_frame_2	DBLd1,2,182,2.7e-61
NS_L7_29_Contig7951_frame_2	DBLa0.15,1,127,9.4e-42	CIDRa3.2,128,281,4.8e-65
NS_L1_95_Contig1832_frame_2	NTSB,2,62,1.4e-13	DBLa0.7,63,324,9.6e-130
S_L6_19_Contig12351_frame_1	CIDRa1.1,1,73,4.7e-36	DBLb12,82,483,1.2e-196
S_L8_68_Contig3144_frame_3	DBLz3,3,184,1.5e-75
NS_L7_29_Contig8019_frame_-1	NTSB,43,102,3e-12	DBLa0.10,103,512,5.4e-216	CIDRa2.2,513,761,1.4e-111	DBLb5,813,1261,5.9e-170	DBLd1,1386,1928,7.8e-162	CIDRb1,1929,2055,2.6e-53
S_L3_13_Contig7128_frame_2	DBLd1,1,153,8.6e-58	CIDRb1,154,274,3.4e-54
NS_L7_44_Contig8030_frame_3	DBLa0.11,1,181,8.4e-97	CIDRa2.4,182,437,8.7e-112	DBLd1,517,742,1.7e-60
S_L8_68_Contig2025_frame_1	CIDRa3.1,11,102,3.5e-20	DBLd1,199,727,1.1e-172	CIDRb1,729,976,9.4e-99
S_L7_16_Contig5108_frm2_orf30	CIDRa3.2,24,133,5e-36	CIDRa3.1,162,192,8.8	DBLd1,225,701,1.9e-160	CIDRb6,702,828,8.9e-59
S_L7_16_Contig5105_frame_-2	DBLa0.17,1,374,1.4e-190	CIDRa3.1,375,683,7.2e-130	DBLd1,793,1332,2.6e-166
NS_L1_95_37099_frame_2	DBLa0.5,1,118,7.9e-48	CIDRa2.5,119,399,3.9e-130
NS_L7_44_Contig9614_frame_-2	DBLb8,1,457,9.2e-181	DBLd1,545,1048,1.2e-169	CIDRb1,1049,1296,3.9e-103
NS_L8_60_Contig8492_frame_-2	DBLd1,136,405,2e-74
S_L7_16_Contig4991_frame_3	DBLz5,1,187,2.4e-83
S_L8_56_Contig6306_frame_2	CIDRb1,1,118,2e-39
S_L6_19_Contig11203_frame_-3	NTSB,22,75,4.4e-14	DBLa0.11,79,396,2.1e-141
NS_L7_35_Contig6329_frame_1	DBLd1,5,299,8.8e-100	CIDRb6,300,347,1.5e-07
NS_L7_29_Contig5997_frame_2	NTSB,14,81,4.5e-15	DBLa0.13,85,511,2.4e-191	CIDRa3.1,512,817,9.3e-129	DBLd1,900,1282,2.5e-108
NS_L7_29_Contig7039_frm-1_orf5	NTSB,14,61,8.7e-13	DBLa0.18,64,125,4.1e-25
NS_L1_95_Contig7773_frame_2	DBLa0.4,1,184,1.5e-82	CIDRa5,185,321,6.6e-51
NS_L8_59_Contig5587_frame_-1	DBLa0.6,1,290,2.3e-128	CIDRa3.1,291,456,1.1e-68
NS_L7_19_Contig10843_frame_3	CIDRa3.2,1,137,2.2e-54	DBLd1,231,774,1.1e-172	CIDRb1,775,895,7e-50
NS_L1_80_Contig35671_frame_1	DBLd1,1,174,2.1e-36
S_L3_13_94278_frame_-2	DBLg13,1,172,3.9e-63
NS_L7_17_Contig4928_frame_2	DBLd1,2,195,2.3e-69	CIDRb1,196,345,6e-67
S_L8_68_Contig6304_frame_-3	DBLd1,1,238,1.1e-80	CIDRb1,239,505,7.6e-102	CIDRa3.4,538,567,3.0
S_L6_19_Contig11000_frame_-2	DBLa0.9,2,179,8.2e-80
NS_L1_80_Contig36383_frame_-3	DBLb9,3,283,6.1e-126	DBLg2,300,678,4.3e-161	DBLg4,695,795,8.6e-43
NS_L1_95_Contig9067_frame_-1	DBLd4,1,47,1.3e-15	CIDRg4,48,181,1.5e-64
NS_L6_24_Contig8720_frame_-1	CIDRa3.1,2,115,1.3e-35	DBLd1,205,246,9.2e-11
S_L7_20_Contig2951_frame_2	CIDRa2.1,3,233,3.3e-85
S_L8_68_Contig6843_frame_2	DBLb4,1,276,1.2e-121	DBLg13,295,669,3.9e-141	DBLd1,684,1177,1e-175	CIDRb1,1178,1429,1.1e-102
NS_L7_29_Contig7952_frame_-3	DBLd1,1,144,7e-54	CIDRb1,145,292,7.1e-64
NS_L7_44_Contig6675_frame_-3	CIDRa6,1,119,2.4e-57	DBLb5,137,376,2e-89
S_L7_42_Contig5459_frm-3_orf0	DBLb3,16,218,6.3e-65
NS_L7_44_Contig7837_frame_2	DBLa0.14,2,38,6.4e-09	CIDRa3.2,39,348,5.9e-138	DBLd1,426,518,1.1e-22
NS_L8_59_Contig6427_frame_2	DBLg11,1,252,3.9e-95	CIDRa3.3,286,315,16.0	DBLd1,391,891,9e-176	CIDRb1,892,1139,8.5e-102
NS_L7_29_Contig8010_frame_2	NTSB,36,87,1.3e-14	DBLa0.19,94,520,1.2e-196	CIDRa2.8,521,795,2.7e-117	DBLd1,896,981,1.1e-16
NS_L6_24_Contig8511_frame_1	DBLd1,1,244,8.9e-85
NS_L6_18_Contig15779_frame_-3	CIDRb1,1,109,8.9e-39
S_L7_16_48446_frame_-1	DBLe3,1,173,5e-89
NS_L8_65_Contig1802_frame_1	DBLd1,1,260,2.5e-84
NS_L1_88_Contig11773_frame_1	NTSB,27,95,4.7e-13	DBLa0.11,96,535,7.6e-207	CIDRa2.4,536,789,1.3e-118	CIDRa3.1,832,854,17.0	DBLd1,879,1249,3e-126
NS_L1_80_Contig32162_frame_-1	DBLe6,2,253,3.2e-113
NS_L1_80_Contig32950_frame_-2	CIDRb1,1,105,5.9e-36	CIDRa5,123,163,7.1
S_L8_56_32499_frame_-3	DBLa1.5,1,204,4.6e-95
NS_L8_59_Contig6428_frame_-1	CIDRa5,1,147,2.3e-77	DBLb2,166,638,6.8e-201	DBLg10,655,1025,4.3e-144	DBLd1,1045,1402,2e-109
S_L7_16_Contig4293_frm3_orf12	NTSB,11,73,6.9e-12	DBLa0.11,74,228,2.3e-72
NS_L1_84_Contig9273_frame_-2	CIDRa2.5,1,53,2.3e-17	DBLd1,138,214,4.8e-18
NS_L1_84_Contig270_frame_2	DBLd1,40,255,9.9e-77	CIDRb1,258,341,6e-26
NS_L7_27_Contig6917_frame_3	DBLa0.19,2,74,2.6e-23	CIDRa2.3,75,139,1e-18
NS_L7_44_Contig7873_frame_2	DBLa0.13,1,110,6.2e-43	CIDRa2.6,111,176,4.5e-30
NS_L7_35_Contig2192_frame_-2	DBLd1,2,129,5.5e-45	CIDRb1,130,244,3.2e-37
S_L8_56_Contig2176_frame_2	DBLb5,5,114,2e-37	DBLg5,131,191,1.2e-24
NS_L6_21_Contig12372_frame_-1	CIDRg5,1,136,2.6e-58
NS_L8_55_Contig5855_frm3_orf208	DBLd1,5,95,3.9e-21	CIDRb1,96,353,3.1e-107	CIDRg2,400,427,7.0
S_L8_68_Contig6727_frame_-3	DBLd1,1,163,8.5e-68	CIDRb6,164,205,1.5e-08
NS_L7_32_Contig14837_frame_2	DBLd1,3,357,8.2e-128
NS_L7_32_Contig13932_frame_-1	DBLd1,139,513,2.9e-119
S_L8_68_Contig6825_frame_1	DBLd1,1,384,7.2e-130	CIDRb5,385,546,3e-70
S_L8_68_Contig6410_frame_1	DBLa1.3,1,201,1.2e-120
NS_L6_21_Contig9986_frame_3	DBLd2,1,83,8.4e-23	CIDRg6,84,331,5.2e-94	DBLg16,388,471,1.2e-27
S_L3_13_Contig5919_frame_2	DBLa0.18,1,108,4.7e-47	CIDRa6,109,194,7.4e-28
NS_L1_84_Contig10106_frame_-1	DBLa0.22,1,157,1.7e-70	CIDRa3.1,158,475,2.2e-127	DBLb5,502,950,2.7e-184
S_L3_13_Contig3878_frame_3	DBLb8,8,37,5.2e-05	DBLg13,46,184,4.7e-57
NS_L1_84_Contig7840_frame_2	DBLa0.1,1,101,8.2e-33	CIDRa3.4,102,351,3.4e-119
S_L7_20_Contig6554_frame_-1	DBLd4,1,173,5e-72	CIDRg5,174,439,1.3e-125
S_L3_13_Contig5979_frame_1	NTSB,29,82,6.7e-12	DBLa0.4,88,230,7.1e-68
S_L6_19_Contig12385_frame_3	CIDRb1,1,145,8.4e-57
NS_L6_21_Contig12243_frame_3	CIDRg4,1,172,5.6e-80
S_L3_13_Contig2233_frame_2	NTSB,1,48,1.4e-11	DBLa0.18,49,353,3.9e-148
S_L8_56_Contig1855_frame_3	DBLg11,1,245,4e-97
NS_L6_21_Contig12522_frame_-3	DBLd4,1,103,8.4e-33	CIDRg2,104,360,4e-116	DBLz6,399,817,5.1e-224	DBLe9,822,1143,2.7e-178
NS_L7_17_Contig4280_frame_3	DBLe9,2,253,1.5e-124
S_L8_68_Contig6819_frame_-2	DBLa0.17,1,44,5.1e-13	CIDRa3.1,45,370,8.2e-125
NS_L7_17_Contig2987_frame_1	DBLe4,1,207,6e-101
S_L7_20_Contig1337_frame_2	DBLg2,7,334,1.6e-116
NS_L7_44_Contig8024_frame_-1	DBLg4,2,223,2.1e-79	DBLz2,237,659,6e-169	DBLe11,661,996,3.2e-114	DBLe3,1033,1343,9.6e-138
NS_L7_27_Contig4104_frame_2	CIDRa3.1,2,106,7.2e-32	CIDRa3.1,142,170,5.3	DBLd1,199,252,4.2e-15
NS_L1_80_Contig9056_frame_-3	DBLa0.12,1,308,4e-137	CIDRa2.4,309,552,5e-109
S_L7_20_Contig5355_frm-1_orf0	DBLg10,1,298,1.3e-135
NS_L7_19_Contig10831_frame_-1	CIDRa2.2,1,145,2.9e-58	CIDRa3.1,189,202,14.0	DBLd1,237,560,2.1e-101
NS_L1_84_31564_frame_-2	DBLa0.19,1,182,5.1e-88	CIDRa2.3,183,446,2.1e-99	DBLd1,528,1089,2.1e-173	CIDRb1,1090,1339,9.3e-110
S_L8_68_Contig4603_frame_2	DBLg13,1,138,2e-53	DBLd1,271,738,4.9e-156	CIDRb4,741,941,3.1e-97
NS_L8_54_Contig10450_frame_2	DBLa0.22,1,146,5.5e-56	CIDRa3.4,147,274,1.1e-46
S_L3_13_Contig7142_frame_-3	DBLa0.12,2,150,7.7e-58	CIDRa2.1,151,291,4e-58
NS_L1_84_Contig9926_frame_1	DBLa0.16,4,232,1.4e-110
S_L7_20_Contig4920_frame_1	DBLd1,1,294,1.1e-93
NS_L7_32_Contig11321_frame_1	DBLa0.18,1,171,9.4e-82	CIDRa5,172,280,3.8e-38
NS_L7_27_Contig7034_frame_3	DBLd5,1,25,0.014	CIDRb5,26,272,4e-107	CIDRa3.4,284,375,1.3
NS_L8_65_Contig3229_frame_1	DBLa0.5,105,542,1.5e-211	CIDRa2.3,543,830,6e-119	DBLd1,906,1370,3.4e-153	CIDRb5,1371,1622,1.2e-103
NS_L7_44_Contig10192_frame_-3	NTSB,25,81,6.9e-16	DBLa0.5,92,334,2.4e-116
S_L8_68_Contig4195_frame_1	DBLa0.1,4,85,1e-24	CIDRa6,86,299,3.2e-79
NS_L1_95_Contig9278_frame_3	DBLb13,1,374,2.5e-154	DBLd1,467,959,1.4e-158	CIDRb7,962,1076,8.9e-45
NS_L8_59_Contig5471_frame_3	DBLb9,1,40,7.3e-09	DBLb3,73,187,1e-25
NS_L7_44_24475_frame_1	DBLa0.16,1,250,4.6e-116
NS_L8_50_Contig5452_frame_-3	NTSB,2,48,2.9e-13	DBLa0.4,53,209,7.2e-75
NS_L1_84_Contig8146_frame_3	CIDRb6,1,105,3.9e-39
S_L6_19_Contig12457_frame_-3	DBLd1,2,348,1.5e-113	CIDRb1,349,605,4.1e-107
NS_L7_32_Contig13912_frame_2	CIDRb1,1,228,2.5e-94
NS_L6_20_Contig16288_frm1_orf5	NTSA,11,88,5.4e-22	DBLa1.4,89,484,1.2e-217	CIDRa1.3,485,736,5.1e-184	DBLb1,745,1214,2.4e-258	DBLg15,1240,1584,4.2e-146	DBLe1,1602,1946,9.2e-202	DBLg8,2036,2405,6.6e-215	DBLz1,2429,2849,4.2e-256	DBLe5,2856,3180,5.3e-204
NS_L1_73_Contig36625_frame_-2	DBLd1,5,272,2.4e-102
S_L7_20_Contig6196_frame_3	DBLb6,4,177,3.4e-71	DBLg1,200,334,8.1e-58
NS_L7_27_Contig2629_frame_-3	DBLa2,1,76,9.7e-30	CIDRa1.8,77,330,1.2e-120
S_L7_20_Contig3225_frame_-1	DBLa0.12,5,169,1e-82
NS_L8_65_Contig5521_frame_-2	CIDRa3.2,1,144,1.2e-59	DBLd1,234,755,2.3e-168	CIDRg7,756,898,3.1e-70
NS_L1_95_Contig9216_frame_-1	DBLd1,1,163,2.7e-60	CIDRb1,164,418,2.5e-108
NS_L7_27_Contig2293_frame_1	DBLg10,1,88,3.2e-29
NS_L1_84_Contig8394_frame_2	CIDRa4,5,211,1.8e-82
NS_L7_32_Contig14728_frame_2	DBLz5,3,191,1.5e-95
NS_L1_84_Contig2786_frame_1	DBLa0.11,1,163,6.9e-69	CIDRa2.6,164,185,0.00032
S_L3_13_Contig7184_frame_-3	DBLd1,13,295,7.1e-97	CIDRb6,296,420,3.9e-56
NS_L7_32_Contig14897_frame_-1	DBLg4,1,254,2e-107	DBLg2,261,636,5.7e-155	CIDRa3.1,732,746,14.0	DBLd1,802,1127,6.9e-115
S_L8_56_Contig6398_frame_2	DBLd1,1,236,2.1e-84	CIDRb6,237,360,9.5e-59
NS_L7_32_Contig13930_frame_-3	DBLa0.5,1,364,3.7e-185	CIDRa2.3,365,505,6.3e-60
NS_L7_17_Contig4894_frame_-3	DBLd1,10,81,7.8e-15	CIDRb1,82,193,1.4e-41
NS_L1_95_Contig9226_frame_3	DBLd4,1,95,2.2e-27	CIDRg9,96,360,2.3e-109
NS_L6_21_Contig8276_frame_3	NTSB,33,101,1.7e-16	DBLa0.16,104,199,9.3e-39
NS_L8_59_Contig6415_frame_-1	CIDRa3.2,2,242,4.5e-101	DBLd1,339,855,6.9e-178	CIDRb1,856,929,4e-19
NS_L8_55_Contig5548_frame_-3	DBLa0.16,2,306,1.1e-144	CIDRa3.4,307,558,1e-115
S_L7_20_Contig6527_frame_2	DBLa0.15,1,132,1.1e-58	CIDRa3.2,133,400,2.1e-118
NS_L8_60_Contig13809_frm-3_orf13	DBLb1,4,82,9.5e-26
NS_L7_29_Contig7139_frame_-1	CIDRb6,1,173,7e-80
NS_L8_59_27484_frame_-1	DBLd1,1,99,1.5e-31	CIDRb1,100,348,6.7e-101
NS_L1_95_Contig8042_frame_-3	NTSB,42,98,1.4e-15	DBLa0.14,99,430,1.2e-150
NS_L6_21_Contig11088_frame_-1	DBLa0.19,2,118,3.8e-44	CIDRa2.3,119,203,2.7e-29
NS_L7_17_Contig3867_frame_3	DBLg2,1,285,3.8e-111	DBLg6,302,649,1.4e-159	DBLg14,666,1037,6.1e-176	CIDRa3.1,1156,1203,1.2
NS_L7_19_Contig8739_frame_2	DBLg9,1,149,5.2e-62
S_L8_68_Contig6838_frame_-3	DBLa0.5,1,367,1.3e-167	CIDRa2.3,368,623,9.2e-117	DBLb5,635,1094,6e-185	DBLd1,1166,1380,2.6e-65
S_L7_16_27164_frame_2	DBLg4,1,245,6.3e-99	CIDRa3.1,260,290,3.0	CIDRa3.4,309,311,19.0	DBLd5,353,756,4.4e-186	CIDRb6,758,844,1.1e-29
NS_L1_80_Contig35748_frame_3	DBLpam1,1,183,7.3e-113
S_L8_56_33371_frame_-3	CIDRg9,1,149,2.8e-70	DBLe2,192,444,1.2e-119
NS_L1_95_Contig9274_frame_2	DBLa0.8,1,150,8.3e-56	CIDRa3.4,151,462,9.6e-146	DBLd1,568,959,6.2e-115
NS_L6_18_Contig14766_frame_-1	DBLd1,3,135,4.4e-42	CIDRb1,138,390,4.3e-99	CIDRb5,405,447,5.1
NS_L6_24_Contig8821_frame_-2	CIDRa3.2,1,140,5.9e-49	DBLd1,216,703,6.2e-172	CIDRb1,705,966,1.3e-103
NS_L8_51_Contig7807_frame_2	NTSB,23,83,3.6e-11	DBLa0.5,84,515,3.6e-213	CIDRa2.9,516,825,8.5e-138	DBLb8,838,1274,9.8e-170	DBLd1,1358,1824,1.4e-166	CIDRg4,1825,2095,2.6e-127
NS_L1_88_Contig17062_frame_-1	DBLa0.1,2,208,5.5e-101	CIDRa3.1,209,522,3e-118	DBLb8,548,1013,8.8e-184	DBLb10,1088,1272,3.2e-62
NS_L6_20_Contig17380_frame_2	DBLd1,1,150,9e-58	CIDRb5,151,323,2.7e-73
S_L8_56_Contig1915_frame_3	NTSB,25,81,5.1e-15	DBLa0.13,83,222,1.8e-67
S_L8_56_Contig7437_frame_-2	DBLa0.19,1,389,8.6e-192	CIDRa2.6,390,691,7.4e-142	DBLd1,758,1214,9.8e-151	CIDRb1,1215,1467,2.2e-98
S_L7_16_Contig4297_frame_1	NTSB,51,109,1.6e-13	DBLa0.11,119,379,5.6e-132
S_L8_68_Contig6016_frame_1	CIDRa3.4,2,152,2.1e-55	DBLd1,254,676,2.3e-121
NS_L7_29_Contig7622_frame_1	DBLd1,10,187,1.9e-67	CIDRb1,188,440,7.9e-102
NS_L6_20_Contig11889_frame_1	DBLd1,1,234,3.3e-78
S_L7_16_Contig5115_frame_3	DBLd1,1,450,3.9e-153	CIDRb1,451,699,1.4e-96
NS_L6_20_Contig17418_frame_-1	DBLd1,1,164,5.5e-65	CIDRg5,165,436,1.3e-118
NS_L1_95_72600_frame_-2	DBLd1,37,157,1.1e-37	CIDRb7,161,271,4.8e-48
NS_L8_59_Contig2142_frm-1_orf0	DBLa0.4,2,53,2.4e-14	CIDRa3.1,54,166,2.8e-29
S_L3_13_39186_frame_-3	DBLa1.1,3,69,6.8e-29	CIDRa1.7,70,320,1.7e-146	DBLb11,329,468,9e-68
NS_L6_18_Contig14811_frame_1	DBLg10,1,250,4.6e-83	DBLd1,269,693,5.6e-117
NS_L1_88_Contig5979_frame_-3	DBLd1,1,296,5.4e-88
S_L8_56_Contig7448_frame_1	NTSA,12,89,1.6e-22	DBLa1.4,90,485,2.2e-219	CIDRa1.3,486,737,1.2e-183	DBLb1,746,1189,6.7e-252
S_L7_42_Contig6281_frame_-3	NTSB,32,85,1.5e-12	DBLa2,93,491,6.2e-182	CIDRa1.8,492,746,7.8e-130	DBLb12,752,1045,8.3e-122
NS_L8_59_77940_frame_3	DBLb1,1,158,4.6e-50
S_L3_13_Contig2409_frame_-2	DBLa0.4,1,383,3.8e-178	CIDRa5,384,640,4.4e-110	DBLb5,661,1132,1.8e-182	DBLg5,1152,1231,7.2e-31
NS_L7_32_Contig2755_frame_-3	CIDRa3.3,12,308,4.2e-122	DBLd1,391,481,7.2e-25
NS_L7_29_Contig7964_frm-3_orf3	NTSB,15,64,8.3e-14	DBLa0.3,69,299,1.4e-116
NS_L7_27_Contig6078_frame_2	DBLd1,1,293,9.1e-82
S_L3_13_Contig6080_frame_1	DBLa0.9,1,170,1.1e-77	CIDRa2.1,171,421,3.5e-90	DBLd1,488,704,2.8e-65
S_L7_42_Contig5431_frame_-3	CIDRb4,1,116,1.6e-41	DBLe13,187,561,2.1e-147
NS_L1_80_Contig36031_frame_-3	DBLz4,2,266,1.1e-140
NS_L8_55_Contig3099_frame_-2	DBLa0.1,1,176,4.3e-77
NS_L8_59_Contig6416_frame_3	CIDRa3.4,2,27,4.6e-06	DBLd1,118,577,4.2e-157	CIDRb1,578,833,3.1e-100
NS_L7_29_Contig7185_frame_-3	DBLb5,119,578,3.3e-185	DBLd1,715,1074,4.2e-109
NS_L7_44_Contig5795_frame_-2	DBLd1,1,180,3.5e-56
NS_L1_80_Contig33214_frame_3	DBLa0.13,1,197,1.5e-90
S_L8_56_Contig6299_frame_-3	DBLa0.22,1,136,4.4e-56	CIDRa3.2,137,430,3.7e-119	DBLd1,509,1026,8.7e-167	CIDRb1,1027,1273,3e-102
NS_L6_21_Contig3716_frame_-3	DBLz5,2,224,2e-101
S_L8_68_Contig6793_frame_2	DBLd1,2,313,6.2e-100
NS_L1_95_Contig2876_frame_2	DBLa0.8,9,207,2.9e-65	CIDRa3.4,208,487,6.4e-102	DBLd1,573,1067,6e-166	CIDRb1,1068,1319,6.3e-111
NS_L1_80_Contig23713_frame_1	DBLb1,5,336,4e-147
S_L8_68_Contig1974_frame_2	DBLb12,2,33,2.4e-07	DBLg16,43,197,2.9e-62
NS_L8_65_25224_frame_2	DBLa0.19,1,357,1.2e-174	CIDRa2.3,358,661,2.2e-108	CIDRa3.1,687,709,17.0	DBLd1,744,1103,1.7e-118
NS_L8_59_Contig5433_frame_3	DBLa0.19,2,101,5.4e-28	CIDRa2.5,102,387,2.3e-118	DBLd1,449,912,8.3e-141
S_L7_42_Contig5458_frame_-3	DBLa1.2,2,180,1.3e-90	CIDRa1.5,181,433,3.1e-123	DBLb3,449,889,1.3e-183	DBLg2,904,1268,5.3e-138	DBLg4,1285,1344,1.8e-22
S_L8_56_33597_frame_3	CIDRa3.1,1,269,5.5e-110	CIDRa3.1,299,331,13.0	DBLd1,355,920,3.5e-172	CIDRb5,922,1168,4.2e-109
NS_L7_32_Contig13231_frm-3_orf0	DBLa0.23,1,209,6e-103
S_L7_20_Contig3387_frame_-2	DBLa0.22,1,191,1e-84	CIDRa3.2,192,457,2e-106	DBLd1,554,620,1.2e-16
NS_L8_65_Contig5593_frame_1	DBLg8,1,87,1.6e-22	DBLz2,101,529,9.3e-185	DBLe4,536,848,2.9e-130
S_L3_13_38896_frame_-1	DBLg12,1,232,8.3e-96	DBLd5,237,306,1.2e-31
NS_L7_29_Contig1864_frame_2	CIDRb1,2,78,1.6e-23
NS_L1_95_Contig9132_frame_-2	CIDRg1,1,117,8.6e-51
NS_L1_95_Contig9025_frame_-2	DBLd1,1,99,3.8e-33	CIDRg4,100,185,9.8e-30
NS_L8_50_Contig7444_frame_3	DBLa0.16,15,124,2.9e-44	CIDRa3.1,125,201,9.3e-25
S_L8_68_Contig6001_frame_2	DBLa2,1,124,3.1e-56	CIDRa1.1,125,377,9.2e-147	DBLb4,386,849,6.5e-208	DBLg4,867,1059,6.9e-83
S_L6_19_Contig4451_frm1_orf0	DBLa1.5,1,82,3.3e-38	CIDRd1,83,240,2.6e-84
S_L8_56_Contig7343_frame_-2	DBLa0.12,1,221,8.7e-113
NS_L6_24_Contig8759_frame_2	DBLd1,1,166,2.6e-61	CIDRg4,167,301,5.2e-67
S_L7_20_Contig6532_frame_-1	DBLa0.5,1,352,1e-178	CIDRa2.10,353,635,3.2e-110	DBLd1,727,1213,4.2e-166	CIDRb1,1214,1441,1.1e-93
NS_L1_95_35847_frame_-3	DBLg5,4,211,2e-80
NS_L7_29_Contig7968_frame_-1	NTSB,13,69,1.2e-14	DBLa0.6,74,344,2.1e-112
NS_L7_35_Contig445_frame_1	DBLa0.19,1,244,2.4e-114	CIDRa2.3,245,541,1.6e-107	DBLd1,636,1167,3.9e-169	CIDRg7,1168,1424,1.9e-118
NS_L6_24_Contig8779_frame_1	DBLa0.8,14,292,8.4e-124	CIDRa5,293,386,2.5e-35
NS_L1_88_Contig15818_frame_3	NTSB,32,85,1.5e-11	DBLa0.9,92,500,5e-193	CIDRa2.1,501,744,1.2e-107	DBLd4,835,1270,2.4e-139	CIDRg2,1271,1523,1.8e-130	DBLe2,1556,1899,2.6e-183	DBLe7,1911,2190,8.2e-124	DBLe3,2233,2482,7.7e-129
S_L3_13_Contig5867_frame_1	NTSA,55,128,3.4e-31	DBLa1.2,129,172,8.5e-17
NS_L8_65_Contig3763_frame_2	CIDRa6,6,185,2.6e-67
NS_L7_19_Contig9908_frame_-1	DBLd1,2,370,1.4e-141
NS_L7_17_Contig5445_frame_-2	DBLb8,13,76,9.1e-24	DBLd2,121,161,10.0	DBLd1,165,637,1.1e-160
NS_L8_65_Contig5485_frame_-1	CIDRa4,31,174,3.6e-49
NS_L7_29_Contig4122_frame_-1	DBLa1.1,1,90,6.6e-39	CIDRa1.7,91,323,7.3e-115
NS_L6_21_Contig12358_frame_-2	CIDRa3.4,2,238,1.4e-107
S_L8_56_Contig6282_frame_1	DBLb5,5,323,2.4e-134
S_L8_68_Contig5966_frame_-1	DBLa0.13,1,131,3.1e-47	CIDRa2.2,132,249,2.7e-49
NS_L8_59_Contig5602_frame_3	DBLd1,1,433,3.4e-135	CIDRb1,434,679,5.3e-100
NS_L8_51_37740_frame_1	NTSB,20,75,2.7e-14	DBLa0.6,82,525,4.4e-212	CIDRa3.4,526,821,8.5e-124	DBLb5,844,1312,4e-203	DBLg13,1326,1423,4.6e-39
NS_L8_50_Contig7133_frame_2	CIDRa2.9,1,151,2.3e-70	DBLd1,235,744,5.4e-164
NS_L7_44_Contig8752_frame_-1	CIDRb1,1,140,6.7e-51	CIDRa3.4,144,190,3.7
NS_L8_55_Contig5858_frame_3	CIDRa3.4,2,129,2.8e-49	DBLd1,211,709,5.9e-164	CIDRb1,710,837,1e-43
NS_L1_80_Contig36099_frame_-2	DBLd7,1,173,1e-64	CIDRb6,174,308,1.3e-59
NS_L6_21_Contig12355_frame_-2	DBLd1,9,235,2.7e-78
S_L7_20_Contig5244_frame_-3	DBLa0.11,1,87,3.4e-29	CIDRa2.2,88,203,2.2e-46
NS_L1_95_Contig8038_frame_-1	DBLd1,4,46,2.9e-08	CIDRb1,49,302,1.5e-100
NS_L6_24_Contig8791_frame_-3	DBLe4,13,312,3.1e-93
NS_L6_20_Contig14310_frame_3	DBLa0.12,1,47,3.3e-14	CIDRa3.1,48,213,3.4e-70
NS_L7_44_Contig9608_frame_-1	DBLa0.9,1,253,2.2e-121
NS_L7_17_Contig5441_frm-2_orf0	DBLd1,1,314,4.4e-109	CIDRb1,315,568,1.9e-100
S_L8_56_Contig7261_frame_2	CIDRb1,1,69,2.4e-18
NS_L7_32_Contig13881_frame_-1	DBLg2,5,128,7.6e-47	DBLg4,136,263,1.8e-59
S_L8_56_Contig7378_frame_1	CIDRa2.5,11,41,1.4e-07	DBLb5,46,511,1.4e-184	DBLd1,592,1128,2.7e-164	CIDRb1,1129,1247,2.1e-44
S_L7_20_32768_frame_3	CIDRb1,2,115,8.3e-40	CIDRa3.1,180,217,1.0
NS_L6_18_Contig11271_frame_3	DBLz3,1,133,3.6e-55	DBLe6,139,455,9e-142
NS_L8_65_Contig5533_frame_-3	NTSB,30,86,5.1e-11	DBLa0.22,98,540,8.8e-211	CIDRa3.2,541,844,4.3e-129	DBLb5,862,1345,1.3e-200	DBLg5,1366,1731,9.1e-158	DBLd1,1769,2240,5.7e-160	CIDRb5,2245,2485,8.6e-107
NS_L1_80_Contig23529_frame_-3	DBLa0.20,1,59,5.5e-19	CIDRa2.10,60,255,3.1e-87
S_L7_20_Contig6506_frame_-1	DBLe10,1,242,3.9e-121
S_L8_68_Contig6178_frame_2	DBLd1,1,154,2.1e-54	CIDRb1,157,410,1.1e-94
NS_L1_73_Contig13365_frame_1	DBLd1,1,104,3.4e-29	CIDRb6,107,197,3.9e-32
NS_L7_27_55774_frame_2	DBLd4,1,88,3.8e-24	CIDRg1,89,349,3.5e-110
NS_L7_19_Contig6186_frame_-1	DBLe2,1,69,9e-24	DBLe7,81,360,2.6e-125	DBLe3,403,512,5.4e-57
NS_L1_84_Contig52_frame_3	DBLd1,25,235,2.1e-66
NS_L7_27_Contig5586_frame_3	DBLd4,1,81,6.7e-19	CIDRg5,82,200,3.1e-51
NS_L7_32_Contig14637_frm-2_orf4	CIDRa3.1,2,145,1.2e-66
S_L7_42_Contig6237_frame_-3	DBLa0.1,1,147,2.8e-71	CIDRa3.1,148,349,2.3e-89
S_L7_20_Contig4344_frame_-2	DBLa0.1,1,174,1.1e-82
S_L8_56_Contig6412_frame_-3	CIDRg1,1,178,1.7e-74	DBLe4,241,558,4.1e-136
S_L8_68_Contig6743_frame_-2	CIDRb1,1,144,4.6e-59
S_L3_13_38380_frame_2	DBLg2,2,75,4.1e-26	DBLg4,88,217,1.2e-62
NS_L8_59_Contig5505_frame_-2	DBLa1.8,2,214,1.7e-108
NS_L1_84_101292_frame_2	DBLz5,1,166,2.8e-70	DBLe11,168,488,2.4e-102
NS_L6_21_Contig11201_frame_1	CIDRa3.3,1,71,6.6e-31	CIDRa3.1,106,116,14.0	DBLd1,161,540,6.5e-134
S_L8_68_28232_frame_2	DBLd1,11,288,3.7e-104	CIDRg7,289,555,2.4e-112
NS_L8_59_Contig5611_frame_2	CIDRa1.4,1,74,4.4e-37	DBLb12,83,158,1.2e-21	DBLb3,159,534,4.8e-161	DBLb9,555,1020,8.3e-189	DBLg11,1040,1128,3.1e-37
NS_L1_80_Contig13757_frame_3	CIDRd1,1,161,3e-70
S_L7_42_Contig6226_frm-3_orf4	NTSB,7,65,1.1e-11	DBLa0.16,72,296,6.4e-88
NS_L7_35_Contig5611_frm1_orf11	CIDRa3.2,44,191,5.7e-70
S_L7_20_Contig5342_frame_-3	DBLb1,1,132,1.1e-37	DBLb3,149,350,1.3e-75
S_L7_16_Contig5062_frame_3	DBLa0.15,1,280,1.1e-135
NS_L8_50_Contig6286_frame_2	DBLd3,1,63,2.9e-28	CIDRg2,64,177,6.6e-56
NS_L7_29_Contig8015_frame_1	CIDRa3.2,1,157,1.8e-71	CIDRa3.1,197,217,9.1	DBLd1,260,764,5.4e-179	CIDRb2,766,1018,1.4e-120
S_L3_13_Contig7057_frame_2	DBLg13,1,213,1e-75
NS_L1_80_Contig26465_frame_3	DBLd9,7,54,2e-15	CIDRg3,55,312,8.9e-119	DBLg2,357,653,3.5e-115
S_L7_20_Contig5379_frame_1	NTSB,49,146,2e-17	DBLa2,147,548,2e-184	CIDRa1.8,549,801,2.5e-125	DBLb12,810,1095,1.3e-116
NS_L7_44_Contig7942_frame_-2	CIDRg4,2,124,1.9e-54
NS_L6_24_Contig8771_frame_-2	DBLb1,2,106,1e-22	DBLg18,155,349,4.7e-84
NS_L7_32_Contig8916_frame_3	DBLb8,1,292,2.4e-121	DBLd1,394,796,5e-112
NS_L1_84_89845_frame_-1	DBLz1,1,13,0.026	DBLe5,20,235,3.5e-132
NS_L8_65_Contig4954_frame_1	NTSB,55,116,1.5e-15	DBLa0.6,117,368,9.9e-131
NS_L1_88_Contig11685_frame_1	NTSB,23,83,9.4e-17	DBLa0.8,84,341,7.3e-134
NS_L8_59_Contig6405_frame_2	NTSB,18,73,2.1e-08	DBLa2,77,477,1.4e-192	CIDRa1.1,478,571,4.6e-46
NS_L6_20_Contig16197_frame_3	CIDRb1,1,140,2.8e-52
NS_L1_88_Contig11540_frame_-3	DBLa0.1,1,104,1e-36	CIDRa3.1,105,255,2.3e-59
S_L7_20_Contig6542_frame_2	DBLd1,1,98,3.3e-28	CIDRb1,99,350,1.2e-105	CIDRa3.4,390,470,0.36
NS_L8_50_Contig5591_frame_-1	CIDRa2.8,9,227,3.6e-99
S_L8_56_Contig7444_frame_1	CIDRa3.2,1,114,2.7e-43	DBLd1,204,660,2.1e-152
S_L7_16_Contig4242_frame_-3	DBLa0.11,1,227,1.8e-109
NS_L7_29_Contig6351_frame_-3	CIDRa3.1,1,158,1.2e-61	DBLd1,236,790,1.2e-175
S_L7_20_Contig6393_frame_1	CIDRb5,6,71,1.1e-18
S_L3_13_Contig7002_frm-1_orf5	NTSA,39,78,7.5e-10	DBLa1.7,84,479,2.4e-205	CIDRa1.4,480,727,2.3e-122	DBLb3,738,1168,4.6e-171	DBLg11,1229,1611,8.9e-132	DBLz2,1625,2047,7.7e-205	DBLe9,2053,2377,1.1e-143
S_L3_13_Contig6082_frame_-2	DBLa1.2,20,417,2.9e-206	CIDRa1.6,418,668,3.6e-129	DBLb6,677,761,1e-13	DBLg11,854,938,4e-34
NS_L8_65_44717_frame_3	DBLz4,1,144,1e-69
NS_L7_44_Contig8117_frame_1	DBLe4,1,202,2.6e-81
NS_L1_80_Contig22385_frame_2	NTSB,20,77,7.9e-14	DBLa0.6,78,194,2.5e-52
S_L3_13_Contig7216_frm3_orf58	CIDRa3.4,20,135,3.1e-53
S_L3_13_Contig7216_frm3_orf59	CIDRa3.4,1,55,4e-15	DBLd1,120,337,1.2e-37
NS_L8_59_Contig6218_frame_1	DBLd4,2,120,1.4e-38	CIDRg5,121,241,1.2e-57
NS_L6_21_Contig11186_frame_-2	DBLd5,5,32,5.6e-05	CIDRb1,33,287,2.4e-106
NS_L7_27_31487_frame_-1	DBLd4,1,88,5.8e-30	CIDRg1,89,344,2.1e-112
S_L7_20_82955_frame_-1	DBLg18,1,164,1.2e-55	DBLe14,195,537,2e-152	DBLe3,573,680,1.7e-51
NS_L1_95_Contig9050_frame_3	DBLb7,1,102,4.7e-34
S_L8_68_Contig6764_frm-2_orf3	NTSB,3,76,1.9e-15	DBLa0.7,77,210,8.4e-67
NS_L8_54_110334_frame_-1	DBLa0.13,1,114,1.2e-41	CIDRa2.3,115,322,7.7e-97
NS_L7_27_Contig2493_frame_-1	CIDRg6,2,215,1.6e-89
NS_L1_95_Contig578_frame_-3	DBLd1,1,429,1.3e-151	CIDRb1,430,676,1.8e-96
NS_L6_18_Contig11868_frame_-2	NTSB,17,88,6.2e-18	DBLa0.8,89,397,1.4e-125
NS_L6_24_Contig5763_frame_2	DBLd4,1,111,1.2e-36	CIDRg5,112,215,9.7e-40
NS_L8_65_Contig5598_frm3_orf1	NTSB,13,74,9.1e-12	DBLa0.9,75,502,8.2e-188	CIDRa2.2,503,747,3.7e-99	DBLd1,843,1349,3.5e-166	CIDRg4,1350,1613,7.9e-120
NS_L8_59_Contig1967_frame_2	DBLd1,14,162,4.9e-49
NS_L1_95_Contig9234_frame_-2	DBLd1,1,398,2.8e-143
NS_L6_24_Contig3241_frame_3	DBLz3,5,429,2.1e-163	DBLe6,434,747,3.1e-135
NS_L6_24_Contig7921_frame_2	NTSB,46,99,3.7e-10	DBLa0.3,103,392,2.4e-135
NS_L7_32_Contig11352_frame_-1	DBLb1,1,256,2.7e-108	DBLg4,278,643,1.5e-149	CIDRa3.1,692,716,17.0	DBLd1,781,1322,3.3e-164	CIDRb1,1323,1590,3.7e-102
NS_L6_21_Contig12368_frame_3	DBLa0.9,1,342,2.3e-170	CIDRa2.7,343,568,1.9e-102
NS_L1_80_Contig36439_frame_1	NTSB,33,97,1.8e-14	DBLa0.6,103,549,2.3e-213	CIDRa3.1,550,873,1.8e-122	DBLb5,899,1354,2.2e-189	DBLg5,1376,1738,4.8e-170	DBLd1,1784,2331,5.1e-173	CIDRb5,2333,2576,2.9e-114
NS_L7_32_Contig14682_frame_-1	CIDRb1,1,167,7e-69
S_L8_68_28286_frame_1	DBLd1,10,324,1e-104	CIDRg5,325,598,5.4e-132
NS_L8_59_Contig2053_frame_-3	NTSB,20,67,6.8e-12	DBLa0.16,74,203,2.2e-61
NS_L1_95_Contig7930_frame_2	DBLd1,1,209,1.5e-75
NS_L1_80_Contig28031_frame_3	CIDRd1,1,98,7.7e-37	DBLb7,129,578,2.8e-186	DBLg11,592,961,5.2e-134	DBLe4,998,1309,2.5e-116
S_L7_42_Contig4999_frm2_orf4	NTSB,10,67,2.2e-13	DBLa0.24,68,120,6.9e-18
NS_L1_73_Contig30492_frame_-2	DBLe2,19,214,3.3e-85
NS_L7_32_Contig7926_frame_-2	DBLb8,3,26,1.8e-06	DBLb8,67,531,1.2e-182	DBLb7,565,756,4.3e-61
NS_L7_44_Contig5307_frm-2_orf4	DBLd4,9,126,2.3e-44
S_L7_16_27212_frame_-1	NTSB,58,116,9.1e-13	DBLa0.11,126,553,1.6e-206	CIDRa2.4,554,796,3.9e-104	DBLd1,888,1392,3.4e-167
S_L7_20_Contig6400_frame_1	DBLa1.1,1,93,7.6e-40	CIDRa1.7,94,218,1.6e-55
NS_L7_29_Contig8003_frame_-2	DBLa0.1,1,202,4.4e-103	CIDRa3.1,203,519,9.3e-133	DBLd1,622,721,2.1e-23
NS_L7_35_58694_frame_1	DBLb3,2,165,6.5e-61
S_L7_42_Contig6262_frame_-2	DBLz3,1,155,4.9e-67	DBLe9,161,480,6.2e-133
S_L8_56_32643_frame_-2	DBLa0.13,1,165,6.1e-72	CIDRa2.6,166,219,8.4e-22
NS_L1_95_Contig6300_frame_-1	DBLa0.17,7,42,2e-10	CIDRa3.1,43,166,1.8e-44
NS_L1_84_43112_frame_3	DBLa0.12,2,293,1e-135
S_L6_19_Contig12464_frame_1	DBLd1,15,548,2.4e-161	CIDRb1,549,797,3e-101
NS_L6_20_Contig17348_frame_-1	CIDRb3,1,125,1.2e-51
NS_L6_24_33595_frame_2	DBLb5,1,339,1.9e-163
NS_L1_80_Contig36315_frame_-1	DBLd1,2,156,9.9e-60	CIDRb1,157,415,4.2e-104
NS_L1_80_Contig33541_frame_-1	DBLa2,1,277,3.7e-129	CIDRa1.1,278,530,2.1e-147	DBLb12,539,708,4.6e-62
S_L6_19_Contig8147_frame_2	DBLg2,2,232,1.3e-92	DBLg2,249,465,1.6e-79
NS_L7_29_Contig7862_frame_-2	DBLg3,27,179,7.6e-61
S_L6_19_Contig7827_frame_-2	CIDRg3,5,70,2.2e-16	DBLb7,110,174,1.1e-12
NS_L7_17_Contig4929_frame_2	DBLa0.23,1,18,0.0027	DBLa0.23,36,299,3.8e-141	CIDRa3.3,300,590,7.4e-148	CIDRa3.1,619,640,7.1	DBLd1,677,1110,1.3e-156
S_L7_16_Contig4246_frame_2	CIDRg4,1,121,7.5e-41
NS_L6_18_Contig15948_frame_-3	CIDRb1,1,125,1.9e-41
S_L7_20_Contig6364_frame_3	DBLepam4,1,31,5.5e-17	DBLepam5,108,201,1.1e-60
S_L7_42_Contig6228_frame_3	DBLa0.22,1,193,2.8e-84	CIDRa3.1,194,488,9.9e-132	DBLd1,571,940,3.6e-138
NS_L7_17_Contig2944_frame_1	CIDRa2.8,40,165,1e-44
NS_L7_19_Contig10859_frm3_orf2	NTSB,11,77,7.9e-14	DBLa0.23,78,495,4.1e-194	CIDRa4,496,753,2e-99	DBLd1,835,1396,3.8e-163	CIDRb5,1397,1550,1e-70
NS_L8_54_Contig1063_frm3_orf10	NTSB,6,79,1.2e-10	DBLa0.1,80,346,1.2e-119
NS_L8_55_Contig5840_frame_-3	CIDRb1,1,146,3e-52
S_L3_13_Contig6027_frame_-3	DBLg12,3,228,9.1e-94	DBLd5,233,300,1.1e-30
NS_L1_95_Contig5967_frame_2	DBLb3,1,277,9.6e-118
NS_L6_21_Contig12459_frame_2	DBLd7,6,32,7.8e-06	CIDRb1,33,284,2.8e-112
S_L7_16_Contig5093_frame_3	DBLa0.13,1,192,6.8e-96	CIDRa2.3,193,453,1.2e-108	DBLb7,459,670,9.6e-84
NS_L1_80_Contig23933_frm1_orf0	DBLg11,2,43,1.5e-10	DBLd8,144,186,0.002	DBLd2,220,564,1.7e-133
NS_L7_44_Contig6767_frame_2	DBLb8,4,281,3.1e-115	DBLd1,369,441,1e-20
NS_L1_80_Contig19258_frame_1	DBLa0.13,1,193,1.4e-105	CIDRa2.9,194,225,1.1e-07
NS_L6_18_Contig15958_frame_-3	DBLg12,1,190,5.2e-86	DBLd5,195,261,8.5e-25
NS_L1_80_Contig33173_frame_1	NTSB,52,114,4.3e-13	DBLa0.5,120,194,9.5e-30
NS_L7_29_Contig7900_frame_1	CIDRa3.3,5,32,15.0	CIDRa3.1,39,208,1.3e-64
S_L7_20_Contig6531_frame_-3	CIDRa3.1,2,58,9.3e-10	CIDRa3.1,92,109,10.0	DBLd1,127,462,6.5e-117
S_L7_20_Contig6560_frame_-1	DBLa0.4,2,398,7.5e-182	CIDRa5,399,647,2.8e-116	DBLb4,666,1128,2.8e-188	DBLg3,1143,1223,4e-30
S_L8_56_Contig7039_frame_-2	DBLd1,1,172,1.4e-67	CIDRb1,173,275,1.2e-37
NS_L8_50_Contig7569_frame_-2	CIDRb6,1,104,4e-30
NS_L7_27_31689_frm-1_orf0	DBLd1,1,289,6e-89	CIDRb5,292,528,8.8e-99
S_L7_20_Contig5751_frame_-2	CIDRa2.2,1,56,2.9e-10	DBLd1,140,208,2.1e-22
NS_L6_24_Contig8811_frame_1	NTSB,18,79,2.8e-14	DBLa0.8,85,517,2.6e-190	CIDRa5,518,762,7.6e-114
NS_L8_51_27330_frame_-2	DBLd1,1,19,0.52	CIDRg7,20,274,5.4e-118
NS_L1_73_Contig31229_frame_1	DBLpam1,1,196,7.5e-124
NS_L8_59_Contig5586_frame_1	DBLd1,4,69,6.9e-14	CIDRb1,70,323,5.9e-103
NS_L7_35_Contig6328_frame_3	DBLa0.13,1,131,5.8e-44	CIDRa2.6,132,336,2.8e-110
S_L7_42_Contig2285_frm2_orf5	NTSA,9,72,9.4e-21	DBLa1.5,79,464,2.8e-202	CIDRb4,465,717,5.3e-113
NS_L8_65_Contig5542_frm2_orf0	DBLb8,11,212,8.3e-85	DBLg9,245,620,2.1e-147
S_L3_13_Contig7208_frame_2	DBLa0.13,1,178,2.9e-81	CIDRa2.3,179,456,1.3e-115	CIDRa3.1,498,516,17.0
S_L6_19_Contig12291_frame_1	DBLd1,1,148,1.1e-48	CIDRb1,149,191,0.00048
NS_L1_88_Contig15739_frm1_orf0	DBLa0.1,1,155,2.6e-63	CIDRa4,156,224,5.5e-17
NS_L1_80_Contig36112_frame_-2	DBLd1,114,314,1.1e-66
NS_L6_20_Contig17407_frame_1	DBLd1,1,335,1.5e-111	CIDRg5,336,462,8.5e-59
NS_L7_32_Contig14898_frame_-2	DBLa0.18,1,172,4.9e-77	CIDRa6,173,424,2.7e-123	DBLb3,446,886,2.1e-179	DBLg11,900,1235,2.6e-104
S_L3_13_Contig3981_frame_3	NTSB,38,88,2.7e-12	DBLa0.5,94,234,1.8e-62
NS_L7_19_Contig7620_frm-3_orf7	DBLg15,1,214,1.7e-113
S_L8_56_33145_frame_3	DBLg8,1,196,3.3e-98	DBLz1,220,305,1.4e-36
S_L8_56_Contig2675_frame_1	DBLd4,1,39,1.3e-08	CIDRg2,40,295,2.2e-111
S_L6_19_Contig11226_frame_1	NTSB,30,95,7.8e-15	DBLa0.19,97,541,4.1e-208	CIDRa2.3,542,823,2.2e-95	DBLd1,908,1093,7.3e-66
NS_L6_18_Contig14786_frame_-2	CIDRa3.1,3,66,2.1e-19	DBLg16,112,422,4.9e-121
S_L8_68_Contig5967_frame_1	DBLd1,1,250,1.6e-89
NS_L7_44_Contig9597_frame_-1	DBLg2,3,26,2.3e-05	DBLd1,226,294,5.7e-24
S_L6_19_Contig12406_frm1_orf0	CIDRb5,3,90,4.2e-26
NS_L7_27_Contig7048_frame_1	DBLd1,1,488,4e-166	CIDRb1,489,740,7.2e-104
NS_L1_84_Contig2140_frame_-1	DBLd1,22,301,6.3e-95
S_L8_56_Contig6400_frame_1	DBLa0.22,1,95,6e-34	CIDRa3.1,96,390,1.1e-116	CIDRa3.3,413,462,1.9	DBLd1,475,510,5.2e-09
NS_L6_18_Contig16057_frame_1	DBLa0.19,1,116,2.3e-42	CIDRa2.5,118,415,6.2e-131
NS_L7_29_31343_frame_2	NTSB,32,97,1.4e-12	DBLa0.15,98,545,8.6e-198	CIDRa3.2,546,716,3.6e-67
NS_L7_29_Contig2984_frame_-2	DBLb5,2,376,2.8e-157	DBLg10,390,765,5.9e-147
NS_L6_21_Contig11834_frame_-3	DBLb6,1,207,4.3e-107
NS_L7_44_Contig211_frame_1	CIDRa3.1,7,35,1.9e-06	CIDRa3.1,63,109,1.1	DBLd1,119,306,8.7e-70
NS_L7_32_Contig11353_frame_1	DBLd1,2,265,3.4e-92
NS_L1_84_Contig9947_frame_-1	CIDRa2.9,13,190,7.2e-70
S_L8_68_Contig5979_frame_1	CIDRb5,1,174,2.6e-85
S_L7_20_Contig6456_frame_-1	DBLd7,1,289,7.2e-94
NS_L6_21_43831_frame_-2	DBLb5,3,150,1e-54	DBLg2,159,538,2.8e-139	DBLd1,558,965,1.7e-136
NS_L8_54_36500_frame_2	DBLd1,14,298,7.6e-93	CIDRb1,299,463,2.7e-76
S_L7_20_32784_frame_3	CIDRg5,1,139,3.6e-58	CIDRg1,167,196,9.3
NS_L6_21_Contig11185_frame_-2	DBLd1,1,367,3.7e-142	CIDRb7,368,406,6.6e-05
NS_L1_80_Contig33628_frame_-1	DBLepam5,1,132,5.6e-72	DBLe10,180,483,2.1e-156
S_L8_68_Contig3174_frame_-3	NTSB,15,73,9.8e-13	DBLa0.22,77,195,1.7e-47
NS_L6_20_Contig14590_frame_2	DBLd4,1,39,2.7e-14	CIDRg1,40,176,5.2e-61
NS_L8_59_Contig6388_frame_-3	NTSB,47,105,2.1e-15	DBLa0.4,110,393,4.5e-136
NS_L6_20_Contig16225_frm1_orf14	DBLd1,9,119,1.7e-34
S_L7_20_Contig3413_frame_3	DBLg15,1,237,4e-98	DBLe1,266,602,1.7e-122	DBLz3,661,1115,6.2e-171	DBLe6,1120,1342,6.1e-93
NS_L6_18_Contig7804_frame_1	DBLg9,4,200,1.4e-78
NS_L7_19_Contig4711_frame_3	CIDRb5,1,65,8e-17
S_L8_56_Contig6377_frame_2	DBLa0.22,1,285,1e-138
S_L7_20_Contig6513_frame_2	NTSB,22,102,2.4e-15	DBLa0.7,103,367,1.7e-132
NS_L8_60_Contig21012_frame_-1	NTSB,36,90,4.1e-14	DBLa0.14,105,510,7.6e-174	CIDRa4,511,785,3e-91	DBLd1,857,1373,1.4e-175	CIDRb1,1374,1628,4.7e-100	CIDRa3.4,1657,1701,2.7
S_L3_13_Contig5928_frame_1	CIDRb6,2,56,1.3e-13
S_L7_16_Contig5129_frm3_orf0	DBLa1.7,1,221,4.5e-114
S_L8_56_Contig7412_frm1_orf0	CIDRg7,1,135,8.3e-57
NS_L6_21_Contig12483_frame_-2	DBLz2,1,416,9.3e-187	DBLe4,423,734,3e-141
S_L8_68_Contig5957_frame_-3	DBLa0.9,1,234,3.6e-119
NS_L7_29_Contig3191_frm-3_orf0	DBLa0.18,2,369,1.3e-164	CIDRa4,370,619,5.9e-96	DBLb5,642,1097,2.3e-195	DBLg10,1138,1508,2.2e-166
NS_L8_50_Contig5417_frame_3	DBLa0.13,1,167,5.1e-87
NS_L7_29_Contig6178_frame_2	DBLb8,1,364,2.2e-144	DBLd1,380,684,1.3e-101
S_L7_42_Contig6296_frame_2	DBLb12,2,416,7.3e-189	DBLg2,433,828,4.6e-151	DBLg2,843,1218,9.4e-149	CIDRa3.1,1322,1369,9.0	DBLd1,1388,1820,1.7e-144	CIDRb6,1821,1897,1.2e-20
NS_L7_29_Contig6248_frame_-3	DBLb11,1,299,8.7e-211	DBLg1,316,673,5.8e-208	DBLe1,692,1049,2.8e-202	DBLg8,1133,1502,1.4e-214	DBLz2,1516,1785,4e-135
NS_L8_50_Contig5406_frame_3	CIDRa5,5,241,1.8e-111	DBLd1,339,701,2e-119
NS_L8_51_27530_frame_3	DBLe2,15,101,5.7e-34	DBLe7,113,397,1.3e-135	DBLe3,442,741,8e-160
NS_L8_59_Contig6330_frame_-1	NTSB,41,96,8.5e-13	DBLa0.5,97,219,1.5e-53
S_L7_42_Contig172_frame_3	DBLd1,1,233,1.4e-68
NS_L7_32_38776_frame_1	DBLa1.2,2,210,1.2e-115
NS_L7_32_41462_frm2_orf4	NTSB,17,67,1.8e-10	DBLa0.5,75,492,2.9e-211	CIDRa2.3,493,764,6.5e-111	DBLd1,852,1267,3.4e-137
S_L7_42_Contig6292_frame_-3	CIDRd2,1,22,0.0041	DBLg2,145,523,6.3e-141	DBLd5,541,951,3.1e-190	CIDRb3,954,1206,5.8e-122	DBLb6,1235,1569,2.5e-141
S_L7_16_Contig5102_frame_-1	DBLd1,2,91,2.4e-27	CIDRb1,92,339,7.7e-101	CIDRa3.1,413,439,1.3
NS_L8_65_Contig4955_frame_1	CIDRa2.3,1,64,4.2e-21	DBLd1,154,372,5.8e-64
NS_L7_19_Contig7589_frame_-1	DBLa0.20,1,132,1.3e-43	CIDRa3.1,133,225,1.2e-32
NS_L1_80_Contig20925_frm2_orf31	CIDRa2.4,6,67,4.4e-17	CIDRa2.7,114,146,17.0	DBLd1,153,479,4.9e-114
S_L6_19_Contig1782_frame_1	DBLb2,2,417,1.1e-184	DBLg10,431,764,4.9e-151
S_L7_20_Contig6277_frame_-3	DBLd4,4,302,2.9e-113	CIDRg2,303,559,3.4e-118
NS_L7_32_Contig14884_frame_2	DBLd4,2,104,1.9e-30	CIDRg5,105,368,4.1e-102	DBLe13,420,789,6.6e-158
S_L7_16_Contig4159_frame_-1	DBLd1,3,68,6.1e-13	CIDRb1,69,166,5.9e-34
NS_L7_27_Contig6032_frm1_orf4	NTSB,6,65,2.4e-13	DBLa0.21,67,472,1.3e-233	CIDRa2.1,473,629,2.4e-65
S_L8_56_Contig7463_frame_2	NTSB,29,80,1.8e-11	DBLa0.11,83,505,9.9e-212	CIDRa2.4,506,753,2.1e-104	DBLd1,846,1323,8.7e-169	CIDRg1,1324,1591,1.3e-99
NS_L6_24_Contig8754_frame_-1	DBLa0.17,3,28,2.2e-05	CIDRa4,29,296,1e-111
NS_L6_24_Contig7893_frame_-1	DBLd1,37,388,1e-108
NS_L8_59_Contig2183_frame_-1	DBLa1.1,1,148,1.5e-69	CIDRa1.4,149,273,1.8e-62
NS_L1_73_Contig25459_frame_3	DBLd1,1,69,3.8e-16	CIDRb1,70,328,2.2e-108
NS_L6_24_135411_frame_2	DBLe1,1,128,3.9e-57	DBLg8,219,301,5e-49
S_L3_13_Contig7043_frame_2	CIDRg1,1,56,1.9e-17
S_L7_20_Contig6508_frame_-3	DBLd1,34,344,3.3e-97
S_L8_56_Contig6392_frame_-3	NTSB,22,89,4e-16	DBLa0.11,93,340,1.5e-118
NS_L6_24_Contig8819_frame_-2	DBLb8,4,135,9.7e-39	DBLg5,156,520,3.9e-141	DBLd1,564,914,1.2e-114
S_L8_68_Contig2676_frame_-2	DBLg13,2,134,7.5e-47
NS_L1_88_Contig15731_frame_-3	DBLa0.1,1,178,1.4e-80	CIDRa3.1,179,318,1.8e-56
NS_L8_54_110384_frame_3	DBLd1,1,92,5.9e-21	CIDRb1,93,325,2.4e-98
NS_L7_29_Contig7137_frame_-3	DBLa0.4,1,84,1.9e-26	CIDRa6,85,335,1.2e-114	DBLb5,366,820,5.4e-174
NS_L1_95_Contig3627_frm-1_orf22	CIDRa3.4,1,55,1.3e-14	DBLd1,120,337,1.2e-37
NS_L8_59_Contig6419_frame_2	DBLa0.1,9,89,3.5e-25	CIDRa3.2,90,399,8.6e-122	DBLd1,491,1076,2e-170	CIDRb1,1078,1325,1.1e-91
NS_L6_24_Contig7924_frame_1	DBLa0.1,1,135,4.6e-61	CIDRa3.1,136,443,2.5e-129	DBLd1,523,999,6.7e-159	CIDRb1,1000,1233,1.9e-93
NS_L7_32_Contig14725_frame_1	DBLa2,1,170,3.5e-93
NS_L8_54_Contig4031_frame_-2	DBLa1.3,1,247,1.3e-158
NS_L1_84_Contig9306_frame_1	CIDRg11,1,149,2e-76
NS_L6_24_Contig7910_frm2_orf1	NTSB,6,54,3.2e-12	DBLa0.4,61,470,2e-188	CIDRa4,471,723,2.3e-83	DBLb5,745,1201,1.1e-182	DBLg9,1215,1517,2.8e-135
S_L7_20_Contig3368_frame_2	DBLd1,4,122,1.4e-33	CIDRb1,123,256,1.3e-61
S_L7_20_33322_frame_-3	DBLd1,1,170,3.5e-65	CIDRg5,171,434,6.7e-124
NS_L7_35_Contig2364_frame_1	DBLd1,1,367,5.6e-129	CIDRb7,368,424,1.9e-16
S_L8_56_Contig6376_frame_-1	DBLd1,1,147,5e-55	CIDRb1,150,284,5.3e-56
NS_L1_84_Contig10039_frame_2	NTSB,6,62,1.2e-14	DBLa0.13,68,355,5.2e-147
NS_L1_88_162117_frame_-1	NTSB,17,93,7.5e-13	DBLa0.16,94,215,3.7e-43
S_L3_13_38888_frame_-2	CIDRb1,3,158,5.3e-69
S_L7_42_Contig5410_frame_-2	CIDRb1,1,130,1.2e-49
S_L8_56_Contig7441_frame_3	DBLd1,9,232,8.2e-79	CIDRb1,233,487,9.4e-109
NS_L6_18_Contig15963_frame_1	DBLe3,39,266,5.8e-128
S_L8_56_Contig7111_frame_1	DBLa1.4,1,280,7.2e-148	CIDRa1.4,281,366,1.1e-34
S_L7_16_Contig5088_frame_1	DBLd1,13,295,2.3e-98	CIDRb6,296,381,2.7e-31
NS_L1_95_Contig6399_frm-2_orf8	DBLb1,4,82,2.6e-25
S_L3_13_Contig7195_frm1_orf15	DBLd7,8,203,6.4e-69	CIDRb4,204,230,0.00055
NS_L8_65_Contig1541_frame_-3	DBLpam2,3,55,8e-25	CIDRpam,64,262,4e-124
S_L8_56_Contig7392_frame_-3	DBLd1,1,264,3e-86
S_L7_20_Contig6334_frame_-2	DBLd1,2,57,8e-14	CIDRb1,58,186,2.1e-56
NS_L7_35_Contig2431_frame_1	DBLd1,10,220,2.3e-78	CIDRb1,224,474,9.4e-97
S_L8_56_Contig6411_frame_3	CIDRa3.3,1,148,4.1e-48	CIDRa3.1,172,216,2.1	DBLd1,243,578,1.4e-112
S_L7_42_Contig6283_frame_-1	NTSB,22,98,5.9e-16	DBLa0.16,100,534,3.5e-205	CIDRa3.4,535,854,3.4e-139	DBLd1,928,1430,1.3e-157
NS_L6_21_Contig12441_frame_2	DBLa0.1,1,140,2.8e-62	CIDRa3.2,141,423,6.3e-98	DBLd1,505,537,4.6e-07
S_L7_42_Contig3851_frm-2_orf3	NTSB,13,67,5.7e-15	DBLa0.23,68,189,1e-57
NS_L1_95_Contig9120_frame_-2	DBLb10,43,493,3e-183
S_L8_56_Contig7425_frame_-2	DBLe1,1,267,6.9e-118	DBLg8,356,421,7e-34
S_L3_13_Contig7241_frame_2	DBLa0.5,1,167,6e-63	CIDRa2.10,168,494,9.6e-114	DBLd1,581,1045,1.7e-173	CIDRb1,1046,1295,9.6e-102
NS_L7_19_Contig7715_frame_-2	DBLa0.11,1,161,1.4e-75	CIDRa2.4,162,417,1.2e-117	CIDRa3.1,457,491,1.3	DBLd1,532,649,4.7e-25
S_L8_56_Contig7166_frame_2	DBLe3,1,186,1.1e-85
NS_L7_19_Contig9928_frame_-2	DBLd4,1,158,2e-56	CIDRg5,159,431,1.2e-129
NS_L6_24_34121_frame_-3	CIDRa2.5,1,193,1.1e-87	CIDRa3.1,221,242,11.0	DBLd1,262,822,1.2e-172
NS_L1_88_Contig17090_frame_-1	DBLa0.18,5,192,3.8e-82	CIDRa5,193,443,7.5e-91	DBLb5,460,918,1.5e-188	DBLg5,927,1291,5.5e-165	DBLd1,1327,1815,4.3e-164	CIDRb1,1816,2073,9.8e-104
S_L7_20_Contig3392_frame_-3	CIDRg1,1,175,2.5e-72
S_L6_19_Contig12384_frame_-2	CIDRb5,1,129,4.6e-51
S_L7_16_Contig4302_frame_2	DBLa1.7,1,87,2.6e-35	CIDRa1.4,88,338,1.8e-126	DBLb1,347,639,1.4e-127
NS_L7_32_Contig14896_frame_-2	CIDRa2.1,1,119,1.2e-52	CIDRa3.1,161,206,14.0	DBLd1,209,714,2.4e-167	CIDRg2,715,964,1.1e-63
NS_L8_59_Contig6420_frame_1	CIDRa2.5,2,63,4.3e-18	DBLd1,156,680,6.5e-172	CIDRg4,681,950,4e-126
NS_L1_88_Contig3547_frame_1	DBLb6,5,166,5.5e-68
NS_L1_84_Contig10071_frame_-3	DBLa0.12,1,64,6.9e-21	CIDRa2.2,65,314,4.4e-108	DBLd1,413,695,1.9e-86
NS_L6_20_Contig6843_frame_-2	DBLa0.13,1,48,6.8e-12	CIDRa2.3,49,185,3.3e-56
NS_L1_73_Contig2688_frm-2_orf0	DBLg13,3,157,1.6e-60
NS_L1_84_Contig7508_frame_1	CIDRg10,1,71,1.7e-28
NS_L7_44_Contig9492_frame_1	DBLb8,13,193,7.6e-59
S_L8_68_Contig4366_frame_-2	CIDRa2.4,5,48,3e-12
NS_L6_24_Contig7888_frame_-1	CIDRg11,1,156,7e-55
S_L7_16_Contig4314_frame_-2	DBLg13,5,342,8.4e-143	DBLg11,349,736,3.8e-139
NS_L6_21_Contig11131_frame_2	DBLd1,1,313,6.6e-111	CIDRb1,314,558,6.4e-98
NS_L6_20_Contig17321_frame_-2	CIDRg7,1,109,1.1e-40
NS_L1_95_37701_frm-1_orf7	NTSB,10,69,5.9e-13	DBLa0.13,70,518,7.5e-214	CIDRa2.9,519,810,2.5e-121	DBLb8,853,898,6.2e-10
S_L8_68_28316_frame_-1	DBLd1,16,471,2.2e-141	CIDRg4,472,745,5.7e-139
S_L7_20_Contig3229_frame_-2	DBLd1,1,169,5.1e-65	CIDRb1,170,242,1.3e-21
NS_L7_35_26780_frame_3	DBLz2,1,151,1.3e-66	DBLe9,157,479,9.5e-123
NS_L8_54_Contig10509_frame_-2	NTSB,19,89,2.2e-18	DBLa0.5,94,526,6.5e-208	CIDRa2.3,527,804,2.5e-107	CIDRa3.1,837,863,17.0	DBLd1,892,1247,2.3e-125
NS_L8_65_Contig4941_frame_-1	DBLz4,2,290,5.6e-129
S_L8_56_Contig6833_frame_-3	DBLd1,1,84,6.1e-21	CIDRb5,85,213,5e-56
NS_L7_35_Contig1935_frame_-2	DBLb5,1,172,1.8e-62
NS_L1_80_104945_frame_1	DBLa0.5,1,195,3.5e-93	CIDRa2.6,196,443,7.1e-119
NS_L1_88_Contig11498_frame_-1	NTSpam,15,64,5.4e-33	DBLpam1,65,441,2e-241	DBLpam2,541,980,6.4e-250	CIDRpam,989,1216,1.1e-142	DBLpam3,1235,1589,2e-236	DBLepam4,1590,1932,3.7e-223	DBLepam5,2010,2317,2.4e-199	DBLe10,2365,2668,2.1e-161
NS_L8_59_Contig5604_frame_3	CIDRa2.4,4,152,1.9e-60	DBLd1,237,726,9.8e-168	CIDRb1,727,977,1.3e-102
NS_L1_80_294404_frame_-1	DBLb10,2,153,3.4e-55	DBLd1,234,268,3.4e-07
NS_L7_17_Contig3074_frm3_orf14	DBLb1,4,82,9.5e-26
S_L7_42_Contig5424_frame_3	NTSB,37,100,4.7e-16	DBLa0.16,101,328,6.8e-100
NS_L1_84_30778_frame_-1	DBLd7,1,36,4.4e-07	CIDRb1,39,288,2.6e-104
S_L8_68_Contig3097_frame_-3	DBLg6,2,132,8.4e-66	DBLg8,145,170,7.8e-07
NS_L7_17_Contig3817_frame_-1	DBLa0.17,2,64,3e-22	CIDRa3.1,65,204,1e-51
NS_L6_21_Contig9903_frame_2	DBLd1,1,232,3.2e-70
NS_L6_20_Contig12775_frame_3	DBLd1,117,598,7.1e-165	CIDRb1,599,742,1e-61
NS_L6_24_32813_frame_3	DBLb5,19,214,1.4e-74
S_L7_20_33444_frame_3	NTSB,46,100,6.3e-12	DBLa0.4,103,513,1.5e-190	CIDRa6,514,765,5.1e-94	DBLd1,845,931,2.4e-24
S_L3_13_Contig7229_frame_-1	NTSB,29,89,3.4e-11	DBLa0.4,94,515,1.1e-185	CIDRa5,516,765,6.8e-100	DBLd1,870,922,2.4e-10
S_L8_56_Contig6391_frame_-2	DBLg2,1,167,3.9e-75	DBLd4,176,331,3.4e-72
NS_L7_29_Contig991_frame_3	DBLa0.15,1,251,1.4e-119
S_L7_42_Contig1060_frame_3	NTSB,8,59,2.1e-12	DBLa0.20,65,204,2.4e-64
NS_L1_80_Contig34594_frame_1	DBLd1,2,119,4.2e-38	CIDRb1,120,363,6.8e-100	CIDRa3.1,416,436,3.6
S_L7_42_Contig6222_frame_3	DBLd1,2,104,7.9e-34	CIDRb1,105,309,2.5e-80
NS_L8_54_Contig8472_frame_1	DBLa0.16,12,91,1.4e-27	CIDRa3.4,92,243,1.9e-66
NS_L1_95_Contig7944_frame_3	DBLd1,1,88,2.6e-26	CIDRb1,89,219,7.3e-58
S_L7_20_Contig6570_frame_2	CIDRa1.8,1,102,5.4e-43	DBLb12,111,575,6.5e-194	DBLz3,665,838,2.7e-66
NS_L6_24_Contig8760_frame_-1	CIDRb1,1,180,8.7e-77
S_L7_42_Contig6229_frame_3	CIDRb1,3,202,3.6e-86
NS_L6_20_Contig17432_frm-3_orf7	DBLa0.13,7,101,3.7e-33	CIDRa2.10,102,387,2.9e-120	DBLd1,466,1045,7e-173	CIDRb1,1046,1133,2.6e-26
NS_L1_80_Contig36262_frame_-1	DBLb2,1,52,1.3e-16	DBLg13,63,433,1.4e-152	DBLz2,447,467,0.1
S_L7_20_32948_frame_-1	DBLe10,1,244,6.5e-118
NS_L1_80_Contig33320_frame_3	DBLa0.19,1,44,5.4e-12	CIDRa2.9,45,223,7.8e-84
S_L6_19_Contig12415_frame_1	DBLd1,1,174,5.1e-67	CIDRb1,175,430,1.7e-106
NS_L6_18_Contig15944_frame_-2	CIDRa3.1,1,47,2.1e-10	CIDRa3.1,79,111,0.68	CIDRa3.4,124,147,14.0	DBLd1,162,246,1.9e-23
NS_L7_32_Contig9007_frame_-3	DBLg2,1,43,1.9e-14
NS_L6_18_Contig3522_frame_-1	CIDRa2.1,1,242,5.9e-105	DBLb5,253,556,4.9e-128
S_L8_68_Contig4462_frame_1	NTSB,3,52,4.6e-14	DBLa0.5,53,317,2e-127
NS_L8_54_Contig5688_frame_2	DBLe4,1,215,4.6e-63
NS_L1_80_Contig21150_frame_-3	DBLg12,6,163,3.6e-78	DBLd5,168,191,1.6e-07
NS_L7_35_Contig6292_frame_2	CIDRb6,2,115,7.1e-34
S_L7_20_Contig6582_frame_3	CIDRg9,2,116,4.5e-48	DBLz6,154,569,9.1e-191	DBLe9,574,894,1e-163
S_L7_16_Contig5116_frame_-1	DBLpam2,1,122,9.4e-70	CIDRpam,131,358,1e-145	DBLpam3,377,730,7.8e-240	DBLepam4,731,1076,1.8e-233	DBLb13,1088,1136,9.2	DBLepam5,1153,1458,1.8e-194	DBLe10,1505,1813,1.6e-153
S_L8_56_Contig5192_frame_-2	DBLa1.2,1,285,4.7e-146	CIDRa1.6,286,393,1.7e-50
S_L3_13_Contig7113_frame_1	DBLb1,2,253,5.7e-130
S_L8_68_Contig6723_frame_2	CIDRb1,1,94,4.8e-25
NS_L8_51_Contig7798_frame_3	CIDRa2.7,20,125,8e-40	DBLd1,182,708,1.9e-168
NS_L1_95_Contig9074_frame_3	DBLg6,1,22,0.0019	DBLd1,40,197,1.3e-54
S_L8_56_Contig7462_frame_3	NTSB,25,92,3.6e-15	DBLa0.9,93,497,4.5e-200	CIDRa2.2,498,753,5.7e-110	DBLd1,853,1392,2.6e-169	CIDRb1,1395,1644,1.9e-101
NS_L1_95_Contig6412_frame_1	DBLg10,2,275,4.1e-103	DBLd1,450,769,4.5e-101
S_L6_19_Contig11385_frame_3	DBLg10,2,68,2.6e-21	DBLd5,75,421,8.8e-125
NS_L8_54_Contig10502_frame_1	DBLa0.5,1,118,1.4e-45	CIDRa2.3,119,386,2.2e-126	DBLd1,472,874,2.6e-141
NS_L6_20_Contig16286_frame_3	NTSB,11,77,3.7e-14	DBLa0.11,83,500,1.6e-206	CIDRa2.4,501,760,5.3e-117	DBLg16,824,1178,2e-130	DBLd1,1245,1646,4.3e-142
NS_L8_55_Contig5843_frame_1	CIDRb5,1,136,1.5e-52
NS_L7_19_Contig10701_frame_-3	DBLd1,17,272,1.4e-54
NS_L6_20_Contig16269_frame_-1	DBLa0.19,1,181,7.6e-77	CIDRa2.5,182,481,2.5e-120	CIDRa3.1,506,529,10.0	DBLd1,581,1105,3.1e-173	CIDRb1,1106,1354,1.7e-99
S_L8_56_Contig6295_frame_-2	DBLa1.5,1,198,3.2e-92
NS_L1_73_Contig25126_frame_2	CIDRa3.1,1,209,5.8e-94
NS_L7_44_Contig7876_frame_3	DBLd1,104,179,3.7e-14
NS_L1_73_Contig11256_frame_1	NTSB,16,86,9e-14	DBLa0.11,90,523,2.6e-197	CIDRa2.4,524,766,9.9e-102	DBLd1,856,1372,3.3e-171	CIDRb1,1373,1620,1.1e-94
S_L6_19_Contig12284_frame_-2	CIDRa3.2,1,159,2.1e-74
S_L7_16_Contig5096_frame_-3	DBLd1,1,154,1e-59	CIDRb1,157,407,1.1e-99
NS_L7_29_Contig7134_frame_1	DBLa0.15,1,119,3e-32	CIDRa3.2,120,294,5.1e-71
S_L8_56_33329_frame_2	DBLa0.19,3,333,6.8e-154	CIDRa2.8,334,406,3.2e-20
NS_L7_35_33497_frame_-3	CIDRa2.4,1,152,4.5e-68	CIDRa3.1,190,205,17.0	DBLd1,242,439,6.6e-64
NS_L6_21_Contig12520_frame_2	CIDRa3.1,1,160,1.8e-67	DBLd1,240,772,3.7e-171	CIDRb5,773,1022,4.6e-120
NS_L7_32_Contig14852_frame_1	DBLa0.17,1,163,1.5e-74	CIDRa3.1,164,475,9.2e-126	DBLd1,542,673,2.6e-23
NS_L8_50_Contig3151_frm-2_orf0	DBLb2,1,204,2.7e-80
S_L8_56_Contig6415_frame_2	CIDRa2.1,1,125,1.4e-54	DBLd1,201,706,7.3e-175
NS_L7_29_Contig2919_frame_3	DBLa0.4,1,184,1e-87
NS_L7_32_Contig13943_frame_-1	CIDRg5,1,120,1.5e-54	DBLg3,173,540,7.2e-153	DBLz5,549,689,1e-53
S_L8_68_Contig3114_frame_-1	DBLd3,2,178,2.8e-98
NS_L1_95_Contig9029_frame_-1	DBLd1,1,174,5.2e-53
NS_L1_80_Contig20792_frame_-1	CIDRa2.1,10,264,5.1e-101	DBLd1,327,643,1.9e-98
NS_L6_24_Contig8764_frame_-1	DBLa0.1,1,187,9.4e-93	CIDRa3.1,188,332,8.6e-59
S_L7_20_Contig6371_frame_2	DBLd1,2,159,6.7e-63	CIDRb1,160,205,2.1e-05
NS_L7_32_Contig13231_frm-1_orf9	DBLa0.12,2,98,1.2e-24	CIDRa4,99,367,4.7e-95	DBLd1,475,571,5.5e-23
NS_L8_59_Contig6435_frame_-3	DBLb3,1,249,1.4e-83	DBLg4,262,636,2.3e-152	DBLg11,703,1091,1.2e-142	DBLd1,1258,1714,8.9e-169	CIDRb5,1715,1960,2.9e-100
S_L3_13_39262_frame_-1	NTSB,21,88,6.3e-16	DBLa0.18,89,499,8.5e-188	CIDRa3.2,500,564,1.3e-20
S_L7_16_Contig5127_frame_1	NTSB,19,78,3.2e-14	DBLa0.5,91,521,1.1e-196	CIDRa2.10,522,807,6.5e-111	DBLd1,891,1435,3.6e-166	CIDRb1,1436,1684,3.5e-98
NS_L6_20_Contig13083_frame_3	DBLb5,12,266,4.2e-107	DBLg10,301,360,1.8e-21
S_L6_19_Contig7840_frm-2_orf5	CIDRb1,1,91,5e-24
NS_L6_18_Contig15990_frame_-1	DBLg10,1,356,1.3e-149
NS_L7_44_Contig8886_frame_2	DBLg12,3,159,2.3e-73	DBLd4,167,534,7e-131
NS_L8_65_Contig2160_frm2_orf5	NTSA,11,88,3.6e-22	DBLa1.4,89,484,7.2e-219	CIDRa1.3,485,736,3.3e-183	DBLb1,745,1226,3.5e-267	DBLg15,1246,1592,1.3e-201	DBLe1,1610,1946,2e-195	DBLg8,2057,2386,1.1e-183
S_L3_13_Contig6068_frame_2	DBLd5,1,343,2.3e-163	CIDRb3,345,534,3.6e-95
NS_L8_59_Contig6394_frame_-1	CIDRa1.6,1,46,6e-21	DBLb3,55,542,2.9e-192
NS_L7_27_Contig4147_frame_2	DBLb7,12,146,3.8e-49	DBLg12,223,579,2.4e-163	DBLd4,584,1008,8.8e-167	CIDRg1,1009,1253,8.5e-111	DBLz6,1291,1714,8.2e-200	DBLe12,1719,2041,2.3e-123
NS_L6_18_Contig7103_frame_2	DBLa0.4,1,161,2.8e-69	CIDRa1.5,162,212,8.1e-15
NS_L6_18_Contig15864_frame_1	DBLd5,4,195,2.2e-85
NS_L6_18_Contig11215_frame_3	DBLa0.22,1,73,1.1e-27	CIDRa3.1,74,256,3.3e-76
NS_L7_17_Contig3803_frame_1	DBLd1,2,110,4.5e-35	CIDRb1,111,184,3.5e-20
NS_L7_17_Contig2949_frame_-1	CIDRa2.4,2,118,1.5e-50	DBLb2,140,225,6.6e-40
NS_L6_21_Contig12225_frm-2_orf6	DBLd1,16,175,1.7e-46
S_L7_42_Contig5439_frame_2	DBLz4,1,282,1.4e-132
NS_L1_84_30456_frame_1	NTSB,9,70,6.2e-14	DBLa0.15,81,343,8.9e-115
NS_L7_27_Contig2669_frame_-2	DBLe13,1,302,2.6e-137	DBLe14,329,397,1.1e-23
S_L6_19_Contig12377_frame_-3	DBLa2,1,310,6.2e-153	CIDRa1.1,311,430,4.7e-65
S_L8_56_Contig6373_frame_-2	CIDRb1,1,128,3.2e-42
S_L8_56_Contig2646_frame_-2	DBLz3,13,441,8.5e-205	DBLe3,449,755,4.5e-154
NS_L1_84_Contig7915_frame_3	DBLa0.5,1,173,8.6e-82
NS_L1_84_Contig9284_frame_-2	CIDRa2.2,2,168,1.7e-67	DBLd1,264,308,3.3e-09
S_L7_20_Contig6332_frame_-3	NTSB,13,68,9.1e-18	DBLa0.23,69,199,3.3e-63
S_L6_19_Contig12468_frame_1	DBLa0.15,7,290,1.5e-128	CIDRa3.2,291,597,6.2e-120	DBLd1,678,1170,6.1e-160	CIDRb1,1171,1419,1.6e-100
NS_L1_95_Contig7914_frame_2	DBLg5,2,204,4.8e-79
NS_L7_29_Contig8013_frame_3	DBLb7,3,148,6.7e-50	DBLg2,159,518,4.7e-145	DBLg4,535,899,3.3e-166	DBLd1,1109,1190,2.3e-22
NS_L6_24_Contig8761_frame_2	NTSB,5,56,1.3e-14	DBLa0.9,57,317,2.4e-127
NS_L1_73_Contig8371_frame_3	DBLd1,1,160,1.6e-60	CIDRb5,162,402,7.8e-106
NS_L1_95_Contig9024_frame_2	DBLd1,3,259,2.3e-89
NS_L8_59_Contig5595_frame_-3	DBLa0.5,1,147,8.1e-66	CIDRa2.8,148,419,9.8e-107	DBLd1,514,574,4.6e-19
NS_L7_27_Contig7035_frm2_orf4	NTSB,5,65,5.6e-13	DBLa0.5,75,432,2.4e-167
NS_L1_95_Contig9266_frame_-3	CIDRa3.4,1,174,1.2e-75	DBLd1,246,792,1.8e-160	CIDRb1,793,918,2.2e-44
NS_L6_21_Contig12346_frame_-3	CIDRa2.6,2,202,4.8e-91
NS_L7_32_Contig14288_frm2_orf0	CIDRb1,1,128,8.5e-41
S_L7_20_Contig2512_frame_-3	CIDRa2.2,1,213,1.5e-88	DBLd1,333,816,3.6e-169	CIDRb1,819,936,1.1e-40
NS_L7_29_Contig2932_frame_3	NTSA,22,97,2.1e-25	DBLa1.2,98,248,2.4e-85
S_L6_19_Contig5573_frame_1	DBLg1,1,83,2.6e-51	DBLe1,102,459,2.8e-202	DBLg8,543,912,1.4e-214	DBLz2,926,1349,5.3e-217	DBLe5,1355,1690,4.5e-192
NS_L7_19_Contig10746_frame_-3	DBLe14,1,214,2.2e-80
NS_L6_24_33579_frame_-3	DBLd1,2,93,1.8e-22	CIDRb1,94,337,5.7e-100
NS_L8_51_27474_frame_-2	DBLd1,1,306,1.3e-104	CIDRb1,307,558,5.2e-104
NS_L6_18_Contig8496_frame_1	DBLe1,1,111,7.8e-57	DBLg8,222,275,3.7e-28
NS_L6_21_Contig7603_frame_2	DBLd1,3,263,1.4e-87	CIDRg2,264,521,6.8e-117
NS_L7_44_Contig8432_frame_3	DBLd1,109,622,5.5e-181	CIDRb1,623,884,1.5e-107	CIDRa3.1,914,972,0.5
NS_L1_80_Contig36354_frame_-2	NTSB,20,95,2e-20	DBLa0.23,96,511,1.3e-234	CIDRa3.3,512,680,4.4e-80
NS_L1_95_Contig5192_frm-1_orf1	NTSA,32,105,1.3e-30	DBLa1.3,106,330,1.4e-122
NS_L8_59_Contig6402_frame_2	DBLd1,1,169,1.6e-66	CIDRb1,170,426,6.9e-109
NS_L1_80_Contig22161_frame_3	CIDRa3.1,1,141,3.5e-51	DBLd1,224,576,7e-100
NS_L1_88_Contig17047_frame_-1	DBLd4,1,52,5.1e-12	CIDRg2,53,313,2.8e-121
NS_L8_65_Contig4927_frame_1	DBLa0.11,1,253,5.4e-126
S_L3_13_Contig7190_frame_-1	DBLb10,6,433,2.2e-196
NS_L6_21_Contig12413_frame_-1	CIDRb1,1,104,7.8e-35
NS_L8_54_Contig4694_frame_3	DBLb5,1,340,8e-137	DBLg11,360,741,8.9e-143	DBLz2,755,838,4.6e-25
NS_L7_17_Contig3947_frame_-3	CIDRa2.2,1,100,2.1e-30	DBLe2,152,219,2.4e-26
NS_L1_88_165193_frame_-2	DBLd5,1,33,1.6e-07	CIDRb2,34,283,8.9e-105
NS_L1_95_Contig9275_frame_3	DBLb5,5,433,1.1e-178	DBLd4,452,867,8.5e-183	CIDRg1,868,949,3.4e-35
NS_L1_80_Contig33535_frame_-3	DBLa0.15,1,183,3.7e-79	CIDRa3.2,184,472,4.9e-93	DBLd1,564,1099,4.3e-178	CIDRb1,1107,1226,1.2e-45
NS_L7_44_Contig6933_frame_-2	NTSA,30,103,3.3e-27	DBLa1.7,104,497,1e-192	CIDRa1.4,498,748,6.6e-139	DBLb1,757,1239,3.2e-222	DBLg11,1259,1631,3e-156
NS_L7_19_51990_frame_1	DBLa0.11,1,385,8.4e-201	CIDRa2.4,386,641,2.1e-117	CIDRa3.1,681,715,1.9	DBLd1,756,877,5.3e-25
S_L6_19_Contig8169_frame_-1	DBLa0.15,7,290,3.6e-129	CIDRa3.2,291,585,1.5e-122	DBLd1,666,704,3.1e-09
NS_L6_21_Contig8613_frame_3	NTSB,22,93,5.3e-20	DBLa0.23,94,338,3.6e-147
NS_L1_80_Contig36419_frame_2	DBLb3,1,280,1.4e-117	DBLg11,406,782,7.1e-159	DBLd1,879,1055,4.2e-63
S_L6_19_Contig12226_frame_-3	NTSB,12,63,2.4e-15	DBLa0.5,65,172,1.3e-44
NS_L8_50_Contig7607_frame_3	DBLe6,1,240,5.3e-122
NS_L1_80_Contig32916_frame_1	DBLg11,3,175,8.8e-64
S_L8_56_Contig1522_frame_1	DBLa0.15,9,257,2.7e-131
S_L6_19_50248_frame_-2	DBLd1,8,615,1.1e-164	CIDRb1,616,871,1.2e-111
NS_L1_95_Contig7985_frame_-1	CIDRa3.3,1,112,1.1e-45	CIDRa3.1,149,179,2.9	DBLd1,193,257,3.9e-20
NS_L8_59_27666_frame_1	DBLa0.5,1,151,3.6e-69	CIDRa2.8,152,423,5.7e-106	DBLd1,518,999,5.1e-155	CIDRb1,1000,1245,1.3e-99
NS_L7_32_Contig13858_frame_2	CIDRg7,1,220,1e-106
NS_L7_19_Contig7096_frame_3	DBLd1,1,360,2e-133
NS_L6_24_Contig8792_frame_2	DBLd1,1,167,3.7e-62	CIDRb1,168,418,2.9e-103
NS_L1_88_Contig17038_frm2_orf0	DBLd5,1,98,1.6e-34	CIDRb4,99,353,1e-111
S_L8_68_Contig5962_frame_2	DBLd1,87,243,5.5e-44
NS_L6_18_Contig10839_frame_1	DBLa0.17,1,79,4.9e-24	CIDRa3.1,80,203,7.6e-47
NS_L8_59_Contig2099_frame_3	DBLd1,18,312,1.8e-102
NS_L6_21_Contig8562_frame_2	DBLa0.1,1,165,3.8e-68	CIDRa4,166,288,2.3e-38
NS_L1_80_Contig36139_frame_-1	DBLd3,1,382,5.8e-162	CIDRg2,383,630,1.3e-112
NS_L7_29_Contig3437_frame_2	NTSA,9,73,5.8e-20	DBLa1.2,80,471,2.9e-194	CIDRa1.6,472,680,6.7e-105
NS_L1_95_Contig2828_frame_3	DBLa0.4,4,287,7.1e-126	CIDRa3.1,288,366,3.5e-16	CIDRa3.1,367,541,4e-75	DBLd1,619,746,2.7e-31
NS_L1_88_53186_frm-2_orf0	DBLa0.5,1,152,2.3e-85
NS_L7_32_Contig14863_frame_-2	DBLd1,1,94,2.3e-19	CIDRb5,96,339,3.4e-106
NS_L6_20_Contig12975_frame_3	CIDRa2.5,5,86,3.2e-25	CIDRa3.4,136,149,9.6	DBLd1,171,259,3.1e-21
NS_L7_35_Contig2254_frame_-3	DBLa2,4,190,1e-92	CIDRa1.8,191,282,1.1e-38
S_L8_68_98038_frame_-3	DBLe3,1,181,4.7e-84
NS_L8_51_Contig7804_frame_3	DBLd4,3,175,1.6e-69	CIDRg1,176,414,7.6e-106	DBLe2,456,797,5.8e-184	DBLe7,809,1088,1.1e-124	DBLe3,1131,1447,2.4e-155
S_L8_56_Contig5061_frame_-1	DBLz6,14,166,9e-71
NS_L7_27_Contig2183_frame_-1	DBLg11,1,172,8.4e-63
NS_L8_54_Contig1114_frame_3	DBLa0.19,6,76,3.3e-20	CIDRa2.3,77,325,2.4e-109
NS_L6_18_Contig15863_frame_-2	DBLd7,6,60,2.6e-13	CIDRb1,61,314,2e-103	CIDRa3.1,326,374,0.12
NS_L8_50_Contig7157_frm2_orf0	DBLa0.8,5,312,2.7e-153
S_L7_20_Contig5173_frame_2	DBLd1,3,46,2.6e-09	CIDRb5,48,171,2.5e-54
NS_L8_54_Contig9603_frame_-2	DBLd4,1,156,6.8e-64	CIDRg4,157,287,2.6e-58
NS_L1_84_Contig10114_frame_3	NTSB,64,128,6.9e-15	DBLa0.15,129,566,1.1e-196	CIDRa3.2,567,869,1.6e-127	DBLd1,975,1472,2.3e-158	CIDRb6,1473,1720,3.6e-106
S_L7_20_Contig3179_frame_3	DBLa1.7,2,27,4.2e-05	CIDRa5,28,246,4.9e-89
S_L7_20_Contig5257_frame_2	DBLa1.1,1,223,2.8e-125
NS_L6_20_Contig17112_frame_-1	DBLa0.5,42,201,5.7e-68
S_L3_13_39354_frame_-3	NTSB,76,139,1.2e-14	DBLa0.15,140,589,5.6e-204	CIDRa3.2,590,796,1.6e-94
NS_L7_19_Contig2529_frame_3	DBLb8,2,388,3.2e-153
S_L3_13_Contig7166_frame_2	CIDRa1.1,1,180,1.2e-103	DBLb12,189,331,6.9e-47
NS_L1_80_139897_frame_2	DBLa0.9,1,215,8.3e-106
NS_L8_55_Contig5844_frame_-3	DBLa0.5,2,334,5.9e-172
S_L8_68_Contig3202_frame_3	CIDRb4,1,185,8.5e-90	CIDRa1.6,348,395,10.0
NS_L7_17_Contig3828_frame_3	CIDRb1,1,183,7.6e-83
NS_L7_27_Contig4688_frm3_orf17	DBLe1,22,126,1.6e-35
NS_L1_84_Contig9948_frame_-3	NTSB,1,50,1.1e-14	DBLa0.12,51,189,6.5e-75
NS_L6_24_Contig7898_frame_1	CIDRg4,4,276,2.8e-122
NS_L7_29_Contig3269_frame_-2	DBLb13,4,35,5.3e-09	DBLd7,55,371,6.6e-131
NS_L1_80_104109_frame_1	DBLa0.5,1,351,1.2e-175	CIDRa2.9,352,400,7e-18
NS_L8_54_Contig10389_frame_-3	DBLd1,10,155,1.9e-49	CIDRb1,156,328,9.7e-76
NS_L1_95_Contig3283_frame_2	NTSB,14,84,2.4e-16	DBLa0.8,85,246,1.6e-84
S_L7_42_28562_frame_-1	NTSB,41,104,4.9e-16	DBLa0.16,105,334,2.5e-100
S_L7_20_Contig3922_frm1_orf17	DBLe1,22,126,1.6e-35
S_L7_42_Contig5171_frame_-3	DBLa0.1,6,180,2.5e-84
NS_L1_84_31170_frame_-3	DBLd4,1,159,1e-58	CIDRg10,160,434,4e-131
NS_L8_55_Contig5139_frame_1	NTSB,19,74,9.6e-16	DBLa0.16,77,228,4.2e-70
S_L8_68_Contig5968_frame_-3	NTSB,5,62,1.7e-16	DBLa0.5,67,350,4.9e-152
S_L6_19_Contig11217_frame_-3	DBLd1,3,482,1.6e-150	CIDRb6,483,528,2.1e-12
NS_L7_27_Contig7018_frame_1	DBLd4,1,95,1.9e-28	CIDRg1,96,356,3.2e-110
S_L8_68_Contig5955_frame_1	CIDRb1,3,108,5e-35
NS_L1_95_Contig9137_frame_2	DBLa0.21,1,176,6.9e-88	CIDRa2.1,177,427,7.9e-119	DBLb4,446,900,7.5e-212	DBLg9,914,1288,2.9e-152
NS_L1_80_Contig36072_frame_2	DBLb10,4,76,1.1e-30	DBLb8,115,283,2.7e-52
NS_L7_32_Contig13915_frame_2	CIDRa2.5,1,148,4.6e-53	CIDRa3.1,181,202,12.0	DBLd1,234,384,4.3e-43
NS_L6_20_Contig5346_frame_-3	DBLa0.8,1,306,7.2e-116
NS_L7_35_Contig2481_frm1_orf0	NTSpam,9,59,9.3e-31	DBLpam1,60,435,9.5e-223	DBLpam2,525,974,1.2e-259	CIDRpam,983,1211,6.1e-148	DBLpam3,1230,1583,2e-239	DBLepam4,1584,1929,2.5e-236	DBLb13,1943,1992,17.0	DBLepam5,2008,2315,4.2e-194	DBLe10,2362,2662,1.2e-158	CIDRa5,2824,2890,0.82	CIDRa1.2,2895,3010,6.4
NS_L6_21_120395_frame_1	DBLb3,1,183,4.1e-85
S_L7_20_Contig1920_frame_2	DBLa0.12,1,138,1.5e-56	CIDRa2.1,140,353,1.7e-95
NS_L8_51_Contig7096_frame_3	DBLd4,1,160,1.1e-61	CIDRg2,161,193,0.00015
NS_L8_65_Contig4959_frame_-3	CIDRa3.3,1,99,4.9e-41	CIDRa3.1,100,154,4.7	DBLd1,192,453,1.7e-73
S_L7_16_27014_frame_-3	DBLd1,1,154,7.5e-57	CIDRb1,155,364,6.3e-92
NS_L7_35_Contig6341_frame_-2	DBLb1,1,110,2e-24	DBLg11,169,546,2.9e-140
NS_L6_20_Contig14614_frame_1	DBLd1,2,184,6.7e-62
NS_L8_50_Contig5416_frame_-3	DBLd1,1,166,3.3e-64	CIDRb5,167,418,3.9e-109
NS_L7_19_Contig9623_frame_3	DBLz2,1,130,4.4e-37	DBLe6,135,196,8.5e-24
NS_L1_73_Contig37799_frm3_orf0	NTSB,2,50,2.3e-14	DBLa0.16,52,336,2.2e-127
S_L7_20_Contig5236_frame_-1	DBLa0.16,1,142,8.3e-62	CIDRa3.1,143,200,1.2e-20
S_L7_16_Contig3949_frame_-1	CIDRb5,6,113,5.2e-45	CIDRg5,129,165,17.0
NS_L1_73_97203_frame_-2	DBLpam3,1,312,5.6e-206
NS_L7_27_Contig4261_frm3_orf0	DBLa1.7,1,125,4.8e-56	CIDRa1.4,126,342,1.1e-117
NS_L6_18_Contig8308_frame_2	DBLepam4,1,155,4.6e-105	DBLb13,164,215,0.46	DBLepam5,232,547,1.4e-192	DBLe10,594,897,1e-161
S_L8_68_Contig6754_frame_-2	DBLe8,1,80,1.1e-42
NS_L6_18_49599_frame_-1	NTSB,39,95,2.2e-16	DBLa0.6,96,326,1.5e-114
NS_L8_59_Contig6390_frame_-1	NTSB,13,81,4.1e-17	DBLa0.15,82,415,4.5e-143
NS_L6_21_Contig4512_frame_-2	DBLz6,3,242,2.7e-107
S_L6_19_Contig6768_frame_-2	NTSB,58,113,6.5e-12	DBLa0.12,116,453,6.2e-176
NS_L7_27_83680_frame_2	CIDRa2.2,1,99,4.2e-26	CIDRa2.7,152,179,4.3
S_L6_19_Contig11220_frame_2	DBLd1,2,165,1.1e-62	CIDRg10,166,421,1.8e-130	CIDRa3.1,432,473,1.2
S_L8_56_Contig2662_frame_-3	CIDRb3,2,137,1.7e-59	DBLb9,165,376,3.5e-69
S_L8_56_Contig6401_frame_-1	CIDRg10,17,281,6.2e-123
S_L7_20_Contig5360_frame_-1	DBLb9,1,66,4e-25	DBLg11,86,421,2.3e-142
S_L8_68_Contig6812_frame_3	DBLe4,13,333,5.4e-103
NS_L1_73_Contig37819_frame_-2	DBLa0.22,1,186,1.7e-85	CIDRa3.1,187,478,8.1e-111	DBLd1,585,1094,5.9e-162	CIDRb1,1095,1344,5.1e-107
NS_L1_88_Contig11627_frame_2	DBLa0.4,1,205,1.4e-106
S_L3_13_Contig5980_frame_3	NTSB,63,121,1.6e-16	DBLa0.9,123,253,2.9e-68
S_L8_56_Contig2236_frame_-3	DBLd1,17,200,3.6e-63
NS_L1_80_Contig35989_frame_-3	DBLd1,1,250,8.3e-94
NS_L1_88_Contig17002_frame_1	DBLd1,25,292,1.3e-83
NS_L7_32_Contig14768_frame_-1	CIDRb1,2,153,6.9e-69
NS_L1_80_Contig36001_frame_2	DBLa1.2,4,255,9.4e-136
S_L8_68_Contig3471_frame_3	DBLd1,3,243,7.5e-82	CIDRb1,246,503,2.1e-103
NS_L8_54_Contig10293_frame_3	DBLa0.18,1,253,3.1e-114	CIDRa6,254,492,1.8e-96
S_L7_20_Contig6416_frame_-3	CIDRb1,1,149,1.3e-61
NS_L7_35_Contig4279_frame_-1	NTSB,9,66,7.8e-13	DBLa0.11,70,317,4.9e-115
NS_L1_84_Contig4092_frame_3	DBLa0.13,2,115,1.4e-44	CIDRa2.6,116,347,1.2e-96
NS_L6_18_Contig7627_frame_-3	DBLg12,1,193,2.1e-81	DBLd5,201,629,4e-153	CIDRb4,630,799,1.2e-79
NS_L7_32_Contig13905_frame_2	DBLd4,1,161,4.6e-59	CIDRg5,162,320,2.6e-75
NS_L8_54_Contig1728_frame_2	DBLb1,22,272,8.1e-127
S_L8_68_Contig3186_frame_3	DBLd1,126,617,2.5e-173	CIDRb1,618,723,7.5e-40
NS_L1_73_234202_frame_1	DBLd1,1,328,8.9e-93
NS_L8_59_Contig2268_frame_-1	DBLd7,1,90,1.3e-26	CIDRb1,91,347,1.9e-100
NS_L6_21_Contig8646_frame_1	DBLa0.6,1,346,1.1e-156	CIDRa3.2,347,552,6.6e-93
NS_L6_18_Contig15996_frame_1	DBLb5,2,147,5e-47	DBLd1,169,307,1.8e-38
NS_L8_51_27494_frame_-2	DBLa0.11,11,271,4.1e-120	CIDRa2.1,273,522,8e-100	CIDRa3.1,553,586,3.9	DBLd1,600,676,4e-26
S_L7_16_Contig1630_frame_-2	DBLz4,2,289,4.1e-154
NS_L1_73_Contig37562_frame_1	DBLe10,1,245,1.4e-121
NS_L8_51_Contig2733_frm-2_orf7	CIDRb1,2,101,3.2e-26
NS_L7_29_Contig8004_frm-2_orf9	NTSA,8,82,4e-19	DBLa1.6,83,469,4.8e-187	CIDRd1,470,724,2.5e-127	DBLg2,769,1163,5e-133	DBLd1,1268,1377,3.4e-40
NS_L8_50_Contig6685_frame_3	DBLz6,1,264,6.5e-151	DBLe6,269,313,2.1e-11
S_L6_19_Contig12432_frame_2	DBLb3,2,352,1.6e-149
NS_L1_80_Contig23360_frame_1	DBLg9,1,152,1.1e-65
NS_L1_95_Contig8613_frame_1	NTSB,17,71,7.3e-14	DBLa0.1,80,505,2e-175	CIDRa3.2,506,797,8.5e-112	DBLg10,818,1186,1.5e-126	DBLd1,1211,1554,7.2e-98
NS_L1_95_37593_frame_-3	DBLa0.15,1,179,4.4e-66	CIDRa4,180,469,9.4e-93	DBLg5,525,718,2.9e-82
NS_L6_21_Contig11023_frame_1	DBLa0.11,2,177,6.8e-88
NS_L8_51_27464_frame_-1	DBLd4,1,173,4.1e-66	CIDRg7,174,447,1.1e-121
NS_L1_95_Contig8039_frame_1	NTSB,38,105,4.9e-16	DBLa0.6,106,422,1.6e-159
S_L3_13_Contig7194_frm-1_orf4	DBLb5,20,389,4.8e-159
NS_L6_21_Contig9792_frm2_orf15	DBLd1,92,132,3.4e-10
NS_L6_21_Contig11188_frame_3	DBLd4,2,44,4e-08	CIDRg8,45,310,3.6e-116
NS_L8_59_Contig5455_frame_-2	DBLd1,30,363,3.9e-124
S_L3_13_Contig6776_frame_-1	DBLb3,1,373,2.7e-159	DBLg2,383,696,1.6e-143
S_L7_20_Contig6380_frame_1	CIDRb1,1,170,5.1e-72
NS_L8_65_Contig1980_frame_3	DBLz1,2,17,0.055	DBLg11,34,181,6.4e-56
S_L8_56_Contig6993_frame_1	DBLd1,1,164,2.2e-64
S_L7_42_Contig6187_frame_3	DBLb5,1,129,8.9e-44	DBLg5,144,240,1.2e-39
S_L8_56_Contig6414_frame_-3	DBLg4,23,391,3.5e-165	DBLd1,526,691,1.2e-55
NS_L1_73_Contig13928_frame_-1	DBLe4,1,160,6.1e-68
S_L7_42_Contig6227_frame_-1	DBLd1,2,331,6.2e-113
S_L7_20_Contig6514_frame_-2	NTSB,46,105,4e-16	DBLa0.22,118,365,2.5e-106
S_L8_56_Contig1917_frame_-3	DBLd1,1,166,1.6e-64	CIDRb6,168,233,2.4e-18
S_L7_20_Contig6547_frame_-2	DBLa0.11,1,106,2.9e-39	CIDRa2.1,107,355,4.5e-110	CIDRa3.1,375,400,5.1	DBLd1,445,587,1e-43
NS_L1_84_31550_frame_-3	DBLa0.11,2,321,3.6e-145	CIDRa2.4,322,562,1.1e-106	DBLd1,650,1138,2.8e-171
NS_L1_80_Contig23539_frame_3	DBLa0.1,3,79,2.2e-27	CIDRa4,80,253,1.4e-63
S_L8_68_Contig6711_frame_2	CIDRg11,1,150,1.4e-71
S_L8_56_Contig6407_frame_2	CIDRg9,1,146,3.7e-68	DBLe2,189,438,2.4e-118
NS_L7_17_Contig3771_frame_1	DBLd1,2,177,3.8e-69	CIDRb6,179,263,3.2e-28
NS_L7_35_Contig5624_frame_1	NTSB,50,110,6e-16	DBLa0.1,117,545,7.6e-216	CIDRa3.2,546,855,2.4e-124	DBLd1,938,1128,6.4e-45
S_L7_16_Contig5071_frame_-2	DBLb1,1,87,3.8e-27	DBLb3,104,498,2.8e-158
NS_L1_88_Contig14497_frame_3	DBLa0.19,1,191,3.5e-80	CIDRa2.3,192,315,5.3e-47
NS_L7_19_Contig9826_frame_1	DBLd1,11,200,4.4e-67
S_L7_20_Contig3361_frm-1_orf3	NTSB,5,70,1.1e-19	DBLa0.12,73,505,1.3e-204	CIDRa2.7,506,764,1.6e-110	DBLd1,864,903,2.3e-08
NS_L6_18_Contig15837_frame_-1	CIDRa3.2,1,155,5.9e-55	DBLb5,176,499,6.6e-126
NS_L7_32_Contig14844_frame_-3	DBLz4,2,283,4.7e-142
NS_L7_17_Contig5444_frame_2	DBLd1,1,164,2.6e-66	CIDRb1,166,425,5e-107
NS_L7_35_Contig1559_frm2_orf5	CIDRb1,1,107,1.4e-31
NS_L1_80_Contig36214_frame_2	DBLz4,1,276,3.8e-154
NS_L1_80_Contig8258_frame_-1	DBLb9,1,48,2.7e-16	DBLg4,57,171,2.6e-51
NS_L1_80_Contig9354_frame_1	DBLg14,9,27,0.037	DBLz3,86,540,3.7e-171	DBLe6,545,596,7.9e-13
NS_L8_51_Contig2972_frame_3	DBLa0.3,1,285,5.1e-128	CIDRa3.4,286,570,3.2e-95	DBLd1,658,909,7.4e-69
NS_L7_27_Contig7053_frame_-2	CIDRg2,1,201,3.7e-97	DBLz6,239,658,2.7e-228	DBLe9,663,977,7.3e-144
NS_L6_18_Contig14745_frame_1	DBLg2,4,116,3.6e-37
NS_L6_18_Contig16093_frame_-2	DBLd4,1,101,3.9e-31	CIDRg1,102,354,5.9e-96	DBLz6,385,849,4e-175	DBLe6,854,1177,2.1e-169
S_L6_19_Contig11218_frame_-1	NTSB,21,85,1.4e-14	DBLa0.9,94,502,2.4e-206	CIDRa2.4,503,745,4.3e-109	DBLd1,848,1364,3e-159	CIDRb5,1365,1610,2.8e-99
S_L8_68_Contig6768_frame_-3	DBLd1,1,167,1.2e-63	CIDRb1,169,320,2.3e-68
S_L8_68_Contig6701_frame_1	DBLd1,2,177,2.2e-45
NS_L7_27_Contig1398_frm1_orf60	CIDRg9,8,112,2e-43	CIDRb6,410,598,0.079
NS_L6_20_Contig16149_frame_3	DBLa0.5,1,49,8.6e-14	CIDRa2.3,50,200,4.5e-70
S_L8_56_Contig7459_frame_-1	NTSA,16,60,3.4e-08	DBLa0.9,69,478,4e-196	CIDRa2.1,479,725,4.9e-102	DBLd1,794,1299,6.1e-170	CIDRb6,1300,1539,3.7e-111
NS_L7_17_Contig3825_frame_2	DBLd1,4,220,9.7e-81
NS_L7_32_40916_frame_-3	DBLd1,2,104,5.4e-34	CIDRb3,105,356,1.7e-97
S_L7_20_Contig6493_frame_2	DBLd1,1,160,3.8e-56	CIDRb1,161,311,5e-65
S_L7_42_Contig6288_frame_1	DBLg10,1,289,2.9e-123	DBLd7,312,713,3.1e-171	CIDRb4,714,965,3.2e-115	CIDRa6,1341,1391,3.2
NS_L1_95_Contig8023_frame_-2	CIDRa2.4,2,139,1.4e-58	DBLg5,194,322,1.1e-54
S_L3_13_Contig7143_frame_2	DBLd1,1,178,9.8e-65	CIDRb1,179,292,1.9e-45
NS_L8_54_Contig10347_frame_1	NTSB,30,93,1.2e-14	DBLa0.15,94,171,1.6e-25
NS_L8_51_Contig7799_frame_-1	NTSB,65,125,6.7e-15	DBLa0.3,126,517,4e-181	CIDRa5,518,765,1.3e-112
NS_L1_88_Contig15783_frm2_orf3	NTSB,13,67,3e-14	DBLa0.1,73,344,1.9e-128
NS_L1_80_Contig30993_frame_3	NTSB,82,136,1.5e-14	DBLa0.5,142,283,7.8e-68
NS_L7_29_Contig6628_frm2_orf3	NTSB,6,70,8.2e-14	DBLa0.8,72,312,3.4e-123
S_L6_19_Contig11190_frame_-3	NTSB,24,92,2.3e-17	DBLa0.9,93,352,1.3e-116
S_L7_20_Contig3355_frame_-3	CIDRa2.8,3,137,1.3e-47	CIDRa3.3,139,198,0.1	DBLd1,235,260,0.011
NS_L1_80_Contig33563_frame_-1	CIDRa2.6,1,173,3.8e-83	DBLd1,277,414,1.5e-33
NS_L7_19_Contig5838_frame_1	DBLa0.12,1,158,1.4e-68	CIDRa2.2,159,313,1.1e-71
NS_L1_88_Contig4079_frame_-1	DBLd1,5,183,9.3e-68	CIDRb1,186,435,2.6e-99
NS_L1_73_Contig37374_frame_3	NTSB,2,52,8.1e-13	DBLa0.15,61,491,4.8e-202	CIDRa3.2,492,800,5.4e-138	CIDRa3.1,841,873,5.7	DBLd1,903,991,2.5e-25
S_L8_56_Contig6416_frame_-1	DBLd1,2,294,1.7e-97	CIDRb1,295,553,3.7e-107	DBLd2,614,646,12.0
S_L7_42_Contig2378_frm3_orf12	NTSpam,18,68,4.7e-32	DBLpam1,69,449,2.4e-235	DBLpam2,549,995,6.8e-265	CIDRpam,1004,1231,7.5e-140	DBLpam3,1250,1603,1.6e-235	DBLepam4,1604,1943,8.5e-228	DBLepam5,2021,2324,8.7e-194	DBLe10,2372,2675,4.4e-161
NS_L7_29_Contig2685_frm-2_orf0	DBLa0.12,1,148,9.8e-69
NS_L7_32_Contig14420_frame_-1	CIDRg4,1,63,3.2e-22
NS_L6_18_Contig15532_frame_2	DBLd1,6,213,1.9e-77
NS_L7_19_Contig10805_frame_-3	CIDRg1,1,200,5.8e-82
S_L8_56_Contig7291_frame_2	CIDRb5,1,63,1e-15
NS_L1_95_Contig432_frame_1	DBLg13,17,372,1.5e-132
NS_L6_20_Contig17341_frame_-1	CIDRa3.2,3,137,3.4e-53	DBLg16,193,259,1.8e-25
S_L7_20_Contig6549_frame_1	DBLd1,1,155,1.5e-64	CIDRb5,156,407,3.3e-115
S_L7_20_Contig6436_frame_-1	NTSA,15,89,3.6e-25	DBLa1.4,90,349,3.9e-127
NS_L1_80_105575_frame_1	CIDRa2.4,1,147,1.9e-66	CIDRa3.1,184,208,7.1	DBLd1,242,480,4.5e-61
S_L7_16_Contig4809_frame_1	CIDRb1,2,196,4.7e-93
NS_L6_24_33851_frame_1	CIDRa1.1,1,28,5.4e-11	DBLb12,37,460,2.9e-187
NS_L6_24_Contig8827_frame_3	DBLb1,1,290,8.7e-109	DBLg12,307,659,7.5e-144	DBLd4,664,1084,5.1e-159
NS_L7_29_Contig7138_frame_3	DBLd1,1,143,2e-51	CIDRb1,144,389,7.2e-94
NS_L6_24_Contig8749_frame_3	CIDRb1,1,171,1e-68
NS_L8_65_Contig4962_frame_3	CIDRa2.5,1,173,3.6e-67	DBLd3,174,215,7.4	DBLd1,255,611,1.5e-116
NS_L7_44_Contig9546_frame_2	NTSB,13,120,7e-29
S_L7_20_Contig5372_frame_1	DBLb6,5,67,5.1e-22	DBLg2,83,472,9e-153	DBLg6,480,521,2.8e-07
NS_L7_29_31169_frame_3	DBLd1,1,120,4.8e-37	CIDRb5,122,368,1.7e-113	CIDRa3.1,421,458,1.8
S_L7_20_Contig6544_frame_2	DBLd1,9,133,1.6e-39	CIDRb1,136,386,7.5e-105
NS_L8_65_Contig4885_frame_-1	NTSB,1,55,1.2e-09	DBLa0.11,57,186,1.2e-51
NS_L7_17_Contig4232_frame_3	CIDRa1.7,1,147,3.7e-79
NS_L8_54_Contig3872_frame_3	NTSB,5,50,3.7e-13	DBLa0.13,60,483,4.5e-206	CIDRa2.9,484,800,8e-122	DBLd1,888,958,1.5e-15
NS_L7_35_Contig5597_frame_3	CIDRb1,2,158,6.5e-66	CIDRa3.1,169,204,1.4
NS_L1_84_Contig9338_frame_-2	DBLg11,2,332,1.9e-140	DBLz4,341,769,1.8e-241
S_L3_13_46717_frame_1	NTSB,6,68,5.5e-15	DBLa0.11,70,411,2.1e-154
NS_L1_80_Contig20624_frame_2	DBLd1,1,257,6.5e-95	CIDRb6,258,470,6.7e-99
NS_L1_84_Contig9353_frame_-3	CIDRa2.4,2,225,2.4e-99	DBLd1,313,801,1.2e-171
NS_L8_65_Contig5522_frm-2_orf5	NTSB,6,72,2.5e-16	DBLa0.13,80,133,6.1e-19
NS_L6_18_Contig11301_frame_2	CIDRa3.4,2,122,5e-40	CIDRa3.1,135,164,15.0	DBLd1,194,451,1.5e-80
S_L7_20_Contig6486_frame_2	CIDRb5,2,128,1.6e-52	CIDRg3,174,210,4.8
NS_L1_80_Contig35669_frame_-3	NTSB,23,86,1.6e-13	DBLa0.9,90,344,1.3e-116
S_L7_16_Contig4285_frame_3	DBLd1,1,91,2.1e-25	CIDRb1,93,333,3.7e-100
NS_L6_20_Contig16246_frame_-2	CIDRb2,1,29,5.8e-06	DBLz6,66,353,2.1e-155
S_L7_42_Contig6230_frame_1	CIDRb1,3,202,1.2e-83
NS_L6_18_50921_frame_3	DBLd1,1,166,4.6e-61	CIDRb1,167,426,2.4e-109
NS_L1_80_Contig20514_frame_3	DBLd4,1,158,9e-56	CIDRg4,159,426,6.9e-131
S_L7_16_Contig1316_frame_1	DBLa0.3,43,316,1.3e-134
NS_L7_29_Contig3321_frame_3	CIDRg1,2,50,6.5e-14	DBLz6,86,512,3.2e-214	DBLe9,518,837,5.1e-141
NS_L8_65_Contig5373_frame_2	DBLa0.16,2,79,7.5e-26	CIDRa6,80,331,5.5e-91	DBLd1,401,791,1.7e-106
S_L7_16_Contig4212_frame_-2	CIDRb1,4,192,1.9e-81
NS_L7_44_Contig9605_frame_2	DBLd7,2,22,0.0031	CIDRb1,23,273,6.8e-101
NS_L8_54_50496_frame_1	DBLd1,14,159,1.8e-49	CIDRb1,160,332,1e-75
NS_L7_29_31137_frame_3	DBLd1,1,127,2e-38	CIDRb5,132,376,1.2e-106
NS_L7_32_Contig6396_frame_-3	DBLa1.2,1,250,1.3e-120
NS_L7_27_Contig6084_frame_3	DBLd4,2,84,4.5e-27	CIDRg1,85,302,4.3e-97
NS_L6_24_Contig8806_frame_-3	DBLd5,10,228,2.9e-83	CIDRb4,230,481,2.7e-108	DBLe2,522,865,1.6e-168	DBLe7,877,969,4.5e-42
NS_L8_59_Contig6381_frame_2	DBLb6,1,207,4e-100	DBLg11,221,349,6.1e-51
S_L8_68_Contig3142_frame_1	DBLa0.9,2,54,4e-11	CIDRa2.3,55,184,2.8e-62
NS_L6_24_Contig7861_frm3_orf3	CIDRa2.10,18,58,4.3e-09	CIDRa3.3,110,130,6.4
NS_L8_54_Contig10510_frame_1	DBLa0.5,1,118,5.6e-44	CIDRa2.3,119,377,9.3e-104	DBLd1,473,975,5.5e-166	CIDRb1,978,1223,1.3e-102
NS_L7_17_Contig2858_frame_3	CIDRa2.4,1,64,3.9e-16	DBLd1,151,652,4e-174	CIDRb1,653,905,8.5e-103
S_L8_68_Contig3225_frame_-3	DBLa0.13,2,99,5.9e-37	CIDRa2.2,100,314,3.7e-84
NS_L6_20_Contig14795_frame_-3	DBLd5,15,211,6.6e-68	CIDRb5,212,324,6.5e-45
NS_L7_44_Contig10341_frame_3	CIDRa3.3,2,39,6.5e-09	DBLd1,125,660,3.8e-158	CIDRb5,663,903,2e-100	CIDRa3.1,914,952,16.0
S_L7_20_Contig5346_frame_2	NTSB,47,109,5.6e-14	DBLa0.10,110,530,6.6e-204	CIDRa2.2,531,789,1.1e-108	DBLd1,888,1218,4.9e-112
NS_L7_35_Contig6318_frame_1	NTSB,33,90,1e-12	DBLa0.9,108,452,2.4e-161
NS_L1_95_Contig9161_frame_3	CIDRg1,1,152,1.1e-59
NS_L8_59_Contig1953_frame_2	DBLb7,1,38,1.1e-08	DBLg11,122,198,8e-29
NS_L1_73_Contig24909_frame_1	CIDRb5,1,186,8.9e-95
NS_L7_19_Contig9875_frame_-2	DBLd4,1,47,7.4e-11	CIDRg9,48,104,3.2e-15	CIDRg1,112,259,4.7e-67
NS_L1_95_Contig8962_frame_3	CIDRb1,5,162,3e-67
S_L8_56_Contig7277_frame_-3	DBLa1.1,1,110,1.1e-56	CIDRa1.2,111,186,2.3e-49
NS_L1_95_Contig6756_frm-3_orf9	DBLb3,9,127,5.1e-42
S_L8_56_Contig2613_frame_-1	CIDRa2.2,1,109,9.1e-38	DBLd1,201,298,7.6e-30
NS_L1_84_Contig7798_frame_3	CIDRa3.1,1,124,6.4e-27
NS_L1_80_Contig10626_frame_2	DBLe4,2,122,1.1e-23
NS_L1_84_Contig10101_frame_3	DBLa0.12,1,126,3.5e-51	CIDRa2.2,127,375,1.5e-113	DBLd1,445,968,9.7e-165	CIDRb1,969,1218,2.3e-96
NS_L7_19_Contig8844_frame_-3	DBLb3,1,170,8.8e-63	DBLg13,180,530,3.5e-131	DBLz1,554,977,6.8e-180	DBLe8,983,1181,9e-72
S_L7_20_Contig6501_frame_-3	DBLd1,1,148,4.8e-50	CIDRb1,149,400,2.5e-108	CIDRa3.1,409,444,2.6
S_L8_68_27867_frame_1	CIDRg7,1,133,1.9e-54	CIDRa3.3,141,180,9.2
S_L3_13_Contig6058_frm-2_orf13	DBLe1,22,126,1.6e-35
NS_L8_54_Contig10403_frame_-2	DBLa0.11,1,183,1.5e-92	CIDRa2.4,184,439,1.8e-121	CIDRa3.1,475,497,14.0	DBLd1,524,1039,3e-169	CIDRb1,1040,1295,2.8e-106
S_L8_56_Contig2644_frame_3	DBLb8,1,285,7.6e-128
NS_L1_84_Contig10104_frm-1_orf0	DBLa0.5,1,252,3.7e-142
NS_L6_18_Contig11237_frame_-1	CIDRg7,1,102,3e-35
NS_L1_84_Contig3722_frame_2	CIDRg5,1,71,2.9e-24
S_L8_56_Contig7436_frame_-1	DBLe11,1,223,1.7e-115	DBLz3,282,525,4.7e-108
NS_L6_24_Contig5473_frm2_orf30	CIDRa3.4,1,55,1.3e-14	DBLd1,120,337,1.2e-37
S_L8_68_Contig6730_frame_-3	DBLd4,1,106,3.6e-36	CIDRg5,107,240,2.5e-67
S_L8_56_Contig7418_frame_2	DBLd1,2,365,1.2e-106
NS_L1_73_Contig37385_frame_1	CIDRb1,3,75,3.1e-17
NS_L6_20_Contig17435_frame_2	DBLa0.1,1,122,1.1e-50	CIDRa3.1,123,453,3.3e-135	CIDRg5,454,464,18.0	DBLd1,532,876,2.7e-112
NS_L7_29_Contig7123_frame_3	CIDRg9,1,85,5.4e-33	DBLg16,134,269,7.9e-59
NS_L6_20_Contig17279_frame_-3	DBLa0.5,1,205,2.8e-102
S_L7_20_Contig6143_frame_1	DBLd1,2,190,8.2e-69
NS_L7_19_Contig10779_frame_-1	CIDRg4,1,187,2.6e-86
NS_L6_24_33939_frame_-1	DBLd4,1,111,8.2e-33	CIDRg4,112,384,1.8e-121
S_L3_13_Contig7192_frame_-2	NTSB,54,107,7.5e-12	DBLa0.13,116,443,3.9e-170
S_L3_13_Contig7203_frame_3	CIDRa6,1,143,7.2e-62	DBLb5,175,513,1.3e-137
S_L7_20_33530_frame_2	NTSB,39,98,2.9e-13	DBLa0.1,105,540,1e-202	CIDRa3.1,541,855,2.5e-119	DBLd1,932,1429,2.3e-166	CIDRb1,1430,1683,2.8e-107
S_L8_56_Contig2417_frame_-1	DBLa1.3,10,314,3e-189
NS_L8_55_33122_frm2_orf0	CIDRb1,2,134,5.8e-66
NS_L7_35_Contig2041_frm-1_orf35	DBLd1,1,83,2.2e-17	CIDRb5,84,338,4.6e-110
NS_L8_59_68249_frame_1	DBLb12,1,107,3.6e-25	DBLg4,120,211,1.6e-35
S_L3_13_Contig7225_frame_2	DBLa0.19,1,120,9.3e-46	CIDRa2.8,121,372,1.7e-108	DBLd1,467,906,1.7e-152
NS_L1_88_Contig11803_frame_-1	NTSB,15,71,2.9e-15	DBLa0.6,75,437,9.2e-189
S_L7_16_Contig4273_frame_2	DBLa0.17,2,88,1.4e-34	CIDRa3.1,89,395,4.4e-131	DBLd1,467,764,3.7e-104
S_L6_19_Contig12429_frame_-2	DBLd1,13,298,2.1e-103	CIDRb1,300,372,1.3e-17
NS_L1_80_Contig33718_frame_-3	NTSB,61,113,1.6e-12	DBLa0.21,121,542,1.2e-220	CIDRa2.1,543,800,2.4e-112	DBLb2,818,1267,5.7e-207	DBLd1,1308,1813,3.5e-169	CIDRb1,1814,2064,3.2e-99
NS_L1_84_Contig9856_frame_3	DBLg1,1,234,4.5e-149	DBLe1,253,613,4.7e-205	DBLg8,713,969,4.7e-157
NS_L1_80_Contig36373_frame_-1	DBLd1,1,302,1.2e-104	CIDRb1,303,560,3.5e-101
S_L7_20_Contig6303_frame_3	CIDRb1,1,153,8.4e-55
NS_L7_32_Contig13799_frame_-2	DBLa0.18,9,171,4.5e-73
NS_L6_21_Contig12415_frame_-2	NTSB,2,44,1.5e-12	DBLa0.7,54,299,3e-118
S_L8_68_Contig6810_frame_-2	DBLb10,117,375,7.7e-102
S_L8_56_Contig2472_frame_3	DBLb3,2,109,7.9e-24	DBLg12,157,206,7.8e-14
NS_L6_20_Contig17081_frame_2	NTSB,21,80,2.5e-16	DBLa0.17,93,257,2.7e-62
NS_L6_18_Contig9039_frame_2	DBLe7,1,172,2.1e-76	DBLe3,217,516,2.9e-158
NS_L1_80_97713_frame_-2	DBLa0.13,1,195,8.2e-103	CIDRa2.5,196,230,7.5e-09
S_L8_56_Contig1864_frame_-1	DBLd1,1,177,1.2e-68	CIDRb1,178,225,2.8e-08
NS_L8_50_Contig6261_frm3_orf4	DBLd4,5,51,3.1e-12	CIDRg1,52,159,2.7e-52
S_L8_68_Contig4967_frame_-1	DBLg10,2,120,3.9e-44
NS_L8_50_Contig5357_frame_2	DBLd1,2,320,1.4e-87
NS_L8_50_Contig7611_frame_1	CIDRb1,1,185,1.9e-81
NS_L1_95_Contig9134_frame_2	NTSB,18,66,3.3e-15	DBLa0.5,73,236,2.2e-65
NS_L6_21_Contig11049_frame_-2	CIDRa5,1,12,2.8	CIDRa5,25,188,7.7e-85	DBLb5,205,369,1.8e-58
S_L3_13_Contig7151_frame_-1	DBLd1,1,308,3.5e-88
S_L7_20_33286_frame_-3	DBLd1,2,389,1.4e-141	CIDRg10,390,521,3.1e-63
S_L6_19_Contig12412_frame_-2	DBLd1,1,322,2.5e-108
S_L7_42_Contig6297_frame_3	NTSB,26,77,6e-12	DBLa0.18,83,491,1.2e-189	CIDRa4,492,749,1.6e-103	DBLb5,771,1208,1.4e-181	DBLd1,1235,1710,7.7e-158	CIDRb1,1711,1958,4e-94	DBLd5,1995,2028,10.0
NS_L6_21_Contig12443_frame_-2	CIDRb1,2,216,2.8e-95
NS_L1_95_Contig9282_frm1_orf3	NTSB,13,67,5.3e-14	DBLa0.14,68,491,3.4e-217	CIDRa4,492,760,5.8e-117	DBLd1,842,1286,8.3e-160
NS_L1_95_Contig2726_frame_2	DBLb9,1,152,1.1e-67	CIDRa3.1,249,274,1.2
NS_L1_80_Contig33278_frm-3_orf0	DBLa0.19,1,98,2.9e-30	CIDRa3.1,99,160,3.5e-18
NS_L8_65_Contig3097_frame_-2	DBLpam3,1,85,1.2e-55	DBLepam4,86,416,6.8e-220	DBLb13,430,475,2.1	DBLepam5,494,794,9.9e-193	DBLe10,841,881,8.3e-18
NS_L8_54_Contig10414_frame_-3	CIDRb5,2,70,5.3e-19	CIDRg2,141,178,11.0
NS_L1_84_Contig9237_frame_1	NTSB,11,83,1.8e-18	DBLa0.5,85,183,3.4e-41
S_L7_16_Contig3710_frm2_orf12	DBLa1.3,1,184,6.6e-137	DBLe8,189,485,3.6e-179
NS_L1_73_Contig25541_frame_1	DBLe6,2,212,2.9e-96
NS_L8_50_Contig7190_frame_2	DBLd1,1,91,1.6e-23	CIDRb1,92,297,1.2e-83
NS_L7_29_Contig7992_frame_-3	DBLb8,4,99,3.2e-32	DBLg13,140,535,1.4e-152
NS_L1_80_Contig36113_frame_-3	CIDRa2.3,1,159,4.1e-72	CIDRa3.1,191,221,4.2	DBLd1,247,315,1.9e-21
NS_L8_50_Contig7105_frame_-1	DBLd1,65,199,4e-31
NS_L6_24_Contig7942_frame_2	CIDRa3.4,1,154,3.3e-74	DBLd1,237,669,2.1e-118
NS_L7_44_Contig6201_frame_-3	NTSB,44,101,1.1e-15	DBLa0.5,107,233,1.1e-57
NS_L8_50_Contig7035_frame_-1	NTSB,45,97,2.4e-16	DBLa0.16,101,189,9.5e-38
S_L3_13_Contig6953_frm-2_orf5	NTSA,11,84,4.9e-29	DBLa1.4,85,131,7.6e-17
NS_L1_73_Contig37268_frame_3	CIDRpam,1,45,2.2e-25	DBLpam3,64,201,1.5e-77
S_L8_56_Contig5434_frame_1	DBLa0.16,1,182,1.1e-91	CIDRa3.4,183,249,8.8e-25
NS_L6_24_Contig6617_frame_2	DBLa0.1,1,317,1.7e-151	CIDRa3.2,318,622,1.2e-133	CIDRa3.1,651,689,1.5
NS_L6_20_Contig16754_frame_3	DBLa0.11,1,170,2.7e-82	CIDRa2.4,171,297,4.9e-51
NS_L1_80_Contig3192_frame_-1	CIDRa1.5,1,241,1.9e-119	DBLb3,261,464,8.8e-76
NS_L6_18_Contig15840_frm-3_orf3	DBLb5,96,568,6.5e-176	DBLd1,725,1236,2.2e-167	CIDRb6,1237,1490,2e-109
NS_L7_35_Contig2381_frame_3	CIDRa2.8,1,120,5.5e-31	DBLd1,216,698,2.7e-174	CIDRb5,699,828,8.9e-56
NS_L6_24_33931_frame_-2	DBLa0.1,1,331,2.4e-159	CIDRa3.1,332,533,2.4e-96
S_L6_19_Contig12448_frame_-1	DBLd1,1,89,1.9e-23	CIDRb1,90,340,1.3e-106
S_L8_68_Contig5954_frame_-2	NTSB,27,78,3.4e-13	DBLa0.15,85,229,2.8e-65
S_L3_13_Contig6078_frame_1	DBLg6,1,249,1.5e-101	DBLd5,254,302,1.8e-14	CIDRa3.1,357,371,12.0	DBLd1,454,653,4.4e-63
S_L3_13_Contig6053_frame_2	DBLa0.1,1,138,1.2e-54	CIDRa3.3,139,436,5.1e-124	DBLd3,440,483,4.8
S_L6_19_Contig8062_frm3_orf6	NTSB,15,75,2.8e-12	DBLa0.12,77,219,4.8e-65
NS_L1_73_Contig35465_frame_2	DBLd1,1,169,1.8e-62	CIDRb1,170,305,1.5e-58
S_L6_19_Contig11225_frame_1	DBLd1,2,389,3.2e-140	CIDRb6,390,642,1.6e-107
S_L7_20_Contig6365_frm-1_orf0	CIDRa2.9,8,155,2.4e-66
NS_L1_73_Contig37799_frm2_orf41	DBLa0.16,2,170,2.9e-78	CIDRa3.4,171,466,6.1e-119	DBLd1,550,1006,4.8e-153	CIDRb1,1007,1255,3.3e-106
S_L7_42_Contig5435_frm-3_orf11	NTSA,11,73,8.1e-22	DBLa1.7,81,473,2.1e-187	CIDRa1.4,474,727,4e-119	DBLb12,736,777,4.2e-09
NS_L6_24_32779_frame_3	DBLb5,19,213,2.3e-68
NS_L8_51_Contig7806_frame_3	NTSB,30,97,1.6e-13	DBLa0.16,98,541,4.1e-222	CIDRa3.4,542,861,6.3e-148	DBLd1,931,1438,4.2e-169	CIDRb1,1439,1698,6.4e-91
S_L8_56_33593_frm-2_orf4	NTSA,11,75,2.2e-19	DBLa1.7,82,478,1.4e-182	CIDRa1.4,479,730,3.5e-120	DBLb3,739,1209,2.3e-198
S_L7_20_Contig5210_frame_1	NTSpam,34,84,1.6e-33	DBLpam1,85,191,6e-66
NS_L1_84_Contig10079_frame_3	CIDRa3.4,1,51,4.6e-15	CIDRa3.4,84,118,19.0	DBLd1,141,471,4.8e-112
NS_L7_27_Contig2050_frm3_orf10	CIDRa3.2,27,127,1.6e-34	CIDRa3.4,196,238,4.4	DBLd1,257,786,1.1e-162	CIDRb1,787,1040,7.2e-109	CIDRa3.3,1060,1100,9.1
S_L7_20_33226_frame_-2	DBLa1.1,1,152,1.7e-75	CIDRa1.7,153,404,1.3e-127	DBLb12,413,454,3e-07
S_L7_16_Contig1619_frame_3	CIDRa3.1,5,299,1.4e-122
S_L3_13_Contig6026_frame_-1	CIDRb1,2,155,2e-68
NS_L8_59_35237_frame_2	DBLa0.5,1,250,2.2e-135
NS_L6_20_Contig15882_frame_-1	CIDRa3.3,1,44,1.4e-12	CIDRa3.1,71,90,20.0	DBLd1,126,618,6.6e-169	CIDRb1,622,875,2.2e-103
S_L8_68_Contig6796_frame_3	CIDRb1,6,166,9.9e-67
NS_L6_18_Contig11244_frame_1	CIDRa2.2,1,147,6.4e-63
S_L8_56_Contig2415_frame_2	DBLb10,14,242,1.9e-75	DBLd1,279,739,6.6e-170	CIDRb1,740,871,1.1e-47
NS_L7_35_Contig4701_frm3_orf4	NTSB,8,69,1.9e-17	DBLa0.6,70,523,7.5e-214	CIDRa3.2,524,805,1.4e-114	DBLb5,827,1303,8e-196	DBLg10,1320,1680,1.3e-156	DBLz4,1723,2140,3e-143
NS_L6_21_Contig12482_frame_-2	DBLd1,1,443,2.4e-158	CIDRb1,444,696,1.1e-100
S_L8_56_Contig6255_frame_-2	DBLz3,7,178,2.4e-65
NS_L7_35_Contig6167_frame_-3	NTSB,67,136,7.8e-16	DBLa0.5,141,428,5.5e-137
NS_L1_73_125900_frame_-1	DBLa0.11,1,192,8.9e-93
S_L6_19_Contig12047_frm1_orf0	CIDRb6,1,131,6.6e-52
NS_L7_19_Contig9771_frame_2	CIDRb5,1,147,9.9e-57
S_L8_56_Contig1437_frame_-3	DBLb5,2,287,7.4e-122
NS_L8_59_Contig1844_frame_-2	DBLd1,1,117,5e-38	CIDRb6,120,180,1.1e-13
S_L3_13_Contig7216_frm1_orf14	DBLa0.16,4,167,1.2e-81	CIDRa3.4,168,280,4.9e-35
NS_L8_59_27592_frame_1	NTSB,42,94,1.2e-10	DBLa0.11,99,511,3.5e-195	CIDRa2.4,512,758,1.7e-108
NS_L7_29_Contig6997_frame_-3	DBLa0.18,1,105,2.8e-36	CIDRa4,106,175,4.4e-15
S_L8_56_Contig5781_frame_-1	NTSB,11,77,2.9e-14	DBLa0.16,82,225,3.8e-64
S_L8_68_Contig5925_frame_3	CIDRb6,1,137,2.2e-55	CIDRb3,165,195,7.6
NS_L7_27_Contig2262_frame_1	NTSA,21,94,1.2e-30	DBLa1.3,95,324,1.5e-124
NS_L8_59_Contig5596_frame_1	NTSB,34,82,3.2e-11	DBLa0.15,98,497,7.7e-169	CIDRa3.2,498,645,4.5e-45
NS_L8_54_Contig9642_frame_-2	DBLd1,54,572,1.9e-160	CIDRb1,573,734,4.3e-74
S_L7_42_Contig6176_frame_3	DBLd1,2,98,3.6e-31	CIDRg5,99,355,4.2e-124
NS_L7_29_31477_frame_1	DBLa0.20,1,239,4.3e-115	CIDRa3.1,240,542,1e-137	DBLd1,631,1118,7e-165	CIDRb6,1119,1368,1.2e-106
S_L6_19_Contig5934_frame_2	DBLb9,55,508,4.2e-205	DBLg10,522,887,3.9e-141
NS_L6_21_42407_frame_-3	DBLb9,2,268,1.5e-125	DBLg6,284,331,5.2e-07
NS_L8_65_Contig4956_frame_2	DBLd1,1,170,2.4e-63	CIDRb1,171,395,3.6e-96
NS_L7_27_Contig6108_frame_-1	DBLa0.18,3,319,1.8e-144	CIDRa6,320,569,1.1e-118	DBLb5,593,678,1.1e-15
NS_L6_20_Contig16150_frame_-2	DBLd1,1,197,4.3e-65
NS_L6_20_Contig17314_frame_-3	DBLd1,3,88,3.2e-15	CIDRb4,89,229,3.2e-59
S_L7_20_Contig6574_frame_3	CIDRa2.6,1,203,2.2e-90	CIDRa3.1,243,284,0.31	DBLd1,316,797,2.3e-175	CIDRb6,799,877,7.4e-23
NS_L6_18_Contig15822_frame_-2	DBLa0.16,7,113,1.7e-41	CIDRa3.1,114,177,9.2e-25
NS_L7_19_Contig10800_frame_-2	CIDRb1,4,209,1.3e-90
NS_L8_65_Contig4939_frm-2_orf4	NTSB,7,76,1.5e-17	DBLa0.14,89,206,5.1e-59
S_L7_16_Contig3303_frame_3	CIDRb1,1,136,5.2e-49
NS_L6_21_Contig9593_frame_-2	DBLd1,5,63,7.5e-12	CIDRb1,66,185,8.4e-49
NS_L1_80_Contig33536_frame_1	DBLg2,1,309,1.7e-139	DBLg5,438,582,2e-61
NS_L1_73_Contig35518_frame_1	DBLd1,4,376,3.8e-138
NS_L7_35_Contig1950_frame_3	DBLd1,1,89,3e-23	CIDRb1,90,235,2.4e-59
NS_L7_35_Contig6367_frame_-3	DBLd1,100,587,1.2e-169	CIDRg9,588,838,4.8e-109
NS_L8_60_Contig9140_frm1_orf1	NTSB,10,58,1.7e-13	DBLa0.1,64,535,2.5e-195	CIDRa3.1,536,821,2.1e-110	DBLd1,931,1003,3e-20
S_L8_56_Contig6343_frame_2	DBLb1,2,227,4.4e-103
S_L8_56_Contig7351_frame_-3	DBLd1,6,219,1.1e-65
NS_L1_95_50019_frame_1	DBLd1,1,89,9.3e-22	CIDRb1,90,349,1.5e-110
NS_L6_24_92413_frame_-3	DBLz6,1,57,6e-23	DBLe6,62,380,4.4e-152
NS_L1_95_Contig3595_frame_-2	DBLpam1,1,185,2.2e-111	DBLe11,197,284,9.0	DBLpam2,285,747,3.1e-262	CIDRpam,756,969,4.6e-136
NS_L7_17_Contig5419_frame_3	DBLd1,1,236,1.3e-90
NS_L8_59_Contig2149_frame_-2	DBLpam2,2,152,3.9e-86	CIDRpam,161,242,1.6e-46
S_L7_20_Contig3309_frame_-2	DBLb5,1,239,2.9e-87
NS_L6_20_Contig15947_frame_-3	CIDRa3.1,2,203,7e-87
NS_L1_88_Contig12142_frm1_orf0	CIDRa2.4,2,41,1.2e-08	DBLd1,132,352,6.4e-68
NS_L8_59_26990_frame_-2	DBLd1,1,153,2.7e-57	CIDRb6,154,272,3.7e-51
NS_L1_95_Contig6560_frame_1	DBLg5,87,223,2.1e-56
NS_L8_51_27518_frame_2	NTSA,1,44,1.6e-13	DBLa1.7,50,455,3.5e-203	CIDRa1.4,456,707,9.5e-140	DBLb1,716,778,5.1e-30
NS_L8_50_Contig7100_frame_-2	DBLd1,75,222,3.3e-37
NS_L7_27_Contig6681_frm3_orf4	CIDRb5,6,169,2.2e-70	DBLz5,187,230,12.0
S_L6_19_Contig4678_frame_1	DBLd5,1,67,5.6e-18	CIDRb4,68,195,7.1e-51
NS_L7_35_Contig3395_frame_-2	DBLb12,11,106,4.3e-27	DBLz6,119,253,5.3e-52
NS_L7_32_199747_frame_3	CIDRa1.5,1,112,1.9e-36	DBLb6,132,406,4.1e-94
S_L7_16_Contig5128_frm-2_orf3	NTSB,4,63,7.3e-13	DBLa0.13,73,502,6.7e-209	CIDRa2.5,504,784,5.1e-115	DBLg2,841,1232,8e-127	DBLd1,1269,1836,9.1e-174	CIDRb6,1837,1911,2e-23
NS_L1_80_Contig35693_frame_2	CIDRb2,1,112,4.8e-46
S_L3_13_Contig7183_frame_2	DBLa0.13,1,126,8e-54	CIDRa2.6,127,415,6.4e-109
S_L7_16_Contig1629_frame_3	CIDRa2.4,1,45,6e-13	DBLd1,96,420,2.7e-99
S_L8_56_Contig6419_frame_1	DBLa0.16,1,137,2.3e-63	CIDRa3.4,138,457,2.3e-143	DBLd1,548,906,1.4e-105
S_L8_68_Contig3267_frame_-2	DBLe11,10,181,2e-86	DBLz3,240,267,0.026
NS_L8_65_Contig34_frame_2	DBLd3,63,78,7.9	DBLd1,82,90,1.1	DBLd1,125,180,3.2e-11
NS_L1_95_37703_frm2_orf4	NTSB,4,72,1.1e-13	DBLa0.5,74,510,3.1e-219	CIDRa2.6,511,794,4.4e-101	DBLb8,822,922,7.1e-27
S_L7_20_33514_frame_1	DBLa0.6,1,354,2e-156	CIDRa3.4,355,436,8.1e-14	CIDRa3.4,441,635,4.7e-90	DBLd1,740,1227,3.3e-172	CIDRb1,1228,1346,4e-39
NS_L7_19_Contig9931_frame_2	DBLz1,1,285,2e-188	DBLe5,292,616,1.5e-197
NS_L6_24_Contig8535_frame_2	DBLb10,1,140,1.5e-40	DBLg5,162,516,2.1e-166	DBLd1,551,911,5.2e-121
NS_L8_50_Contig7530_frame_1	DBLd1,5,166,2.4e-65
NS_L1_88_Contig15760_frame_3	DBLd1,3,472,2.3e-162	CIDRg4,473,732,8.3e-121
NS_L1_95_Contig8021_frame_2	DBLd1,3,320,3.5e-102
S_L6_19_Contig11216_frame_2	DBLg11,2,88,5.3e-21	DBLg10,179,509,1e-134
S_L8_68_27917_frame_3	DBLd1,1,160,1.8e-60	CIDRb1,161,273,1.2e-38
NS_L7_35_Contig6126_frame_-1	CIDRa2.6,1,147,1.6e-59	DBLd1,222,711,9.8e-167	CIDRb1,714,961,1.3e-96
NS_L1_84_100768_frame_-2	DBLz6,4,74,1.4e-32	DBLe6,79,398,2.9e-153
NS_L6_21_Contig9979_frame_-1	DBLd4,8,37,3.6e-07	CIDRg2,38,295,1.9e-117
NS_L6_20_Contig17333_frame_-3	DBLa0.5,1,242,1e-118
NS_L1_88_162525_frame_2	DBLd1,1,153,6.4e-51	CIDRb6,154,225,1e-16
NS_L1_95_Contig8811_frame_2	DBLa0.22,1,179,2.6e-85
NS_L8_65_Contig3284_frame_3	CIDRa3.1,1,158,7.6e-61
NS_L7_29_29305_frame_1	DBLb1,1,168,1.3e-70
NS_L6_21_Contig12157_frame_-1	DBLd1,1,73,1.2e-17	CIDRb1,74,166,2.9e-30
NS_L1_84_Contig4731_frame_-1	NTSB,44,105,2.4e-13	DBLa0.21,113,528,3.8e-225	CIDRa2.1,529,780,7e-113
NS_L6_18_Contig11104_frame_3	DBLg10,1,96,1.5e-40	DBLd1,120,350,1.4e-64
NS_L6_21_Contig12527_frame_-2	NTSB,46,116,2.5e-13	DBLa2,118,519,7.4e-202	CIDRa1.8,520,734,1.8e-104	CIDRa1.4,735,793,3.8e-18	DBLb12,802,1288,1.3e-218	CIDRa3.1,1360,1404,8.2	DBLd1,1477,1816,2.7e-74
NS_L1_84_30500_frame_3	DBLd1,2,291,1.1e-97	CIDRg2,292,345,1.4e-15
NS_L1_88_Contig17084_frm-3_orf86	DBLe4,30,336,1.4e-128
NS_L6_24_34175_frame_-3	CIDRa3.4,1,157,1.3e-76	DBLd1,240,810,1.1e-173	CIDRb1,811,1061,1.2e-103
S_L7_16_Contig4816_frame_-3	CIDRg6,1,77,3.4e-26
NS_L8_55_Contig5801_frame_-3	CIDRb6,1,93,3.1e-30
NS_L7_29_Contig7074_frame_3	DBLa0.5,1,202,7.2e-110
S_L7_16_Contig4016_frame_1	DBLg4,1,242,5.8e-96	CIDRa3.1,257,287,2.9	CIDRa3.4,293,293,15.0	DBLd5,350,753,4.4e-186	CIDRb3,755,837,9.8e-27
NS_L6_21_Contig8556_frame_-2	DBLpam1,1,272,7.4e-154
NS_L8_54_Contig10465_frame_-1	DBLd1,3,306,7.9e-101
NS_L8_59_27434_frame_2	DBLd1,12,193,2.8e-69	CIDRb1,194,446,6.1e-103
NS_L7_29_Contig7883_frm-3_orf3	NTSB,8,67,8.5e-16	DBLa0.20,72,160,7e-33
S_L8_68_Contig4456_frame_2	DBLg13,2,75,1.4e-14
S_L8_68_Contig6802_frame_-1	DBLa0.22,1,167,1e-79	CIDRa3.1,168,338,8.7e-79
S_L7_20_Contig6411_frame_-3	DBLb3,10,201,4e-69
NS_L7_29_Contig3356_frm1_orf4	NTSA,9,72,2.1e-23	DBLa1.7,80,399,4.1e-175
S_L7_42_Contig5457_frm3_orf11	NTSA,18,89,5.1e-21	DBLa0.18,90,498,2e-173	CIDRa5,499,749,1.3e-112	DBLb5,774,1108,5.5e-134
NS_L6_18_Contig14795_frame_-3	DBLd1,1,88,3.9e-24	CIDRb1,89,342,9.2e-109
NS_L7_32_Contig14465_frame_3	DBLb3,2,68,2.1e-19	DBLb6,69,181,4.7e-46
NS_L7_35_Contig1641_frm2_orf7	CIDRa1.8,17,93,6.3e-26	DBLb4,99,467,4.7e-154
NS_L7_32_190904_frame_2	NTSB,1,36,6.8e-08	DBLa0.11,46,274,2.9e-108
NS_L1_80_Contig23421_frame_-2	DBLd1,1,157,6.3e-62	CIDRb1,158,300,1.3e-59
S_L7_20_Contig6578_frame_2	NTSB,21,92,1.8e-17	DBLa0.15,94,515,2.8e-187	CIDRa3.2,516,822,2.6e-128	DBLd9,921,947,0.023
NS_L8_59_27160_frame_2	DBLa0.5,25,318,1.7e-147
S_L7_20_Contig6463_frame_-1	DBLa0.22,1,122,1.2e-52	CIDRa3.2,123,290,3.5e-70
S_L6_19_Contig11848_frame_1	DBLd1,13,453,9.6e-152	CIDRb5,454,515,8.6e-12
NS_L1_95_Contig3103_frame_1	NTSB,2,55,2.4e-15	DBLa0.16,60,199,1.5e-66
S_L7_16_Contig532_frame_-3	DBLa0.1,2,95,1.2e-25	CIDRa3.5,96,169,8.2e-24
S_L7_20_33324_frame_-3	DBLb3,2,423,2.4e-150	DBLg18,485,580,1.2e-37
NS_L1_80_Contig35869_frame_-1	DBLg3,1,42,7.2e-20	DBLz5,51,214,9.8e-76
NS_L8_51_Contig7762_frame_-2	CIDRa2.5,1,156,6.1e-74	CIDRa3.1,201,233,4.9	DBLd1,250,394,2.4e-38
S_L7_42_Contig6096_frm1_orf3	DBLa0.22,2,124,2.2e-47	CIDRa3.3,125,336,1.1e-106
NS_L1_80_Contig36243_frame_-3	DBLa0.16,2,284,3.9e-131	CIDRa3.1,285,439,2.5e-61
NS_L6_21_Contig12361_frame_-1	DBLe7,1,159,3.1e-71	DBLe3,202,264,5.4e-27
NS_L1_80_Contig18136_frame_1	DBLd1,1,157,2.2e-52	CIDRb5,158,285,7.2e-54
NS_L1_84_Contig2898_frame_3	NTSB,21,84,6e-15	DBLa0.24,86,226,1.7e-61
S_L8_56_Contig3869_frame_-2	DBLz3,13,439,6e-200	DBLe6,445,498,1.1e-16
NS_L7_32_Contig14706_frame_-2	DBLg11,1,110,9.2e-44
NS_L1_95_Contig7982_frame_1	DBLa0.16,2,254,8.4e-139
NS_L8_51_80805_frame_1	DBLd1,73,466,4.4e-137
S_L6_19_Contig12470_frame_1	NTSB,41,90,1.4e-10	DBLa0.16,102,542,8.8e-215	CIDRa3.4,543,847,3.1e-131	DBLd1,919,1442,9.8e-173
NS_L1_80_106847_frame_-3	DBLa0.11,1,75,4.5e-27	CIDRa2.4,76,332,1.9e-112	DBLd1,411,595,8.1e-57
S_L7_16_Contig2261_frame_1	DBLg3,1,50,6.8e-24	DBLz4,59,212,2.9e-67
S_L7_20_Contig5230_frame_1	DBLb13,7,64,5e-20	DBLg16,78,196,7.4e-55
NS_L7_44_Contig10272_frame_3	CIDRb1,1,187,1.2e-84
S_L3_13_Contig6058_frm-3_orf51	DBLe4,1,162,1.2e-36
S_L7_20_Contig6569_frame_3	CIDRa3.2,1,146,8.3e-71	DBLd1,218,738,4.2e-179	CIDRg10,739,821,5.8e-30
S_L7_42_Contig6274_frame_-2	DBLd1,11,299,4.8e-99	CIDRb5,301,556,7.1e-107
S_L6_19_Contig6703_frame_2	NTSB,61,124,2.3e-16	DBLa0.1,126,450,5.6e-155
NS_L6_18_Contig3664_frame_2	NTSA,31,69,4.3e-11	DBLa0.18,79,178,7.1e-50
S_L7_20_Contig5340_frame_3	DBLg13,6,221,1.5e-81	DBLd1,245,726,5.2e-162
NS_L1_80_97645_frame_2	DBLa1.5,1,230,3.7e-118
NS_L1_95_Contig9254_frame_3	DBLd1,1,157,2.7e-61	CIDRb1,159,418,2.5e-105
NS_L6_20_Contig11279_frame_-2	DBLd1,2,98,2.5e-28	CIDRb1,99,235,2.4e-61
S_L6_19_Contig12454_frame_-3	DBLa0.6,2,24,1.9e-06	CIDRa3.2,25,336,1.9e-137	CIDRa3.1,377,396,5.3	DBLd1,435,660,2.8e-63
NS_L8_51_Contig2877_frame_-1	DBLa1.2,3,69,5.9e-22	CIDRa1.5,70,203,1.3e-67
NS_L7_29_Contig7068_frm1_orf4	NTSB,8,78,3e-16	DBLa0.15,79,410,1.7e-154
NS_L7_19_Contig7503_frame_1	DBLd1,1,166,1.9e-52
NS_L8_65_24828_frame_-2	CIDRg4,1,152,2e-72
S_L7_20_Contig5321_frame_1	DBLg4,1,287,1e-112
S_L8_56_Contig2541_frm2_orf16	DBLa0.15,6,299,8.6e-108	CIDRa2.2,300,562,8.7e-111	CIDRa3.1,596,615,19.0	DBLd1,644,1049,6.6e-146
NS_L1_95_37617_frame_-1	DBLa0.1,2,323,2.1e-152	CIDRa3.3,324,619,2.9e-129	CIDRa3.1,656,687,12.0	DBLd1,700,767,4.6e-20
NS_L7_32_Contig13876_frame_-1	DBLb1,2,202,6.8e-79	DBLg3,218,286,2.9e-22
S_L8_68_Contig4394_frame_2	DBLb13,1,135,4.6e-33	CIDRa3.1,197,217,4.7
NS_L1_80_102915_frame_2	DBLe10,1,299,2.6e-152
NS_L6_24_Contig7916_frame_-1	NTSB,28,81,4.7e-13	DBLa0.5,91,540,1.5e-199	CIDRa2.3,541,813,1e-109	CIDRa3.1,848,870,5.6	DBLd1,934,1334,1.5e-119
S_L7_16_Contig5048_frame_3	DBLz5,1,183,1.9e-100	DBLe4,189,502,2.8e-139
NS_L6_20_Contig12375_frame_2	DBLd1,90,612,5.8e-175
S_L7_20_Contig5309_frame_-2	DBLd1,1,159,1.5e-59	CIDRb1,160,275,1.1e-38
NS_L8_59_Contig6414_frm-1_orf5	DBLb5,88,555,1.7e-184
NS_L8_51_Contig2759_frame_3	CIDRb5,2,67,1.5e-21
S_L8_56_Contig2060_frame_2	CIDRg6,1,135,2.3e-51
S_L7_42_Contig5449_frame_3	DBLz2,30,455,7.7e-193	DBLe3,462,771,1.8e-157
NS_L6_24_Contig5507_frame_-1	CIDRb2,1,138,3e-65	DBLz6,187,392,1.5e-66
NS_L1_73_Contig24410_frame_-2	DBLd1,136,184,4.2e-11
S_L7_20_Contig1956_frame_3	CIDRa2.4,7,47,8.5e-10	CIDRa3.1,78,117,0.6	DBLg5,127,481,3.8e-152	DBLd1,515,627,5.6e-13
NS_L7_44_Contig9569_frame_-1	CIDRg1,3,189,7e-83
NS_L7_35_26452_frame_3	DBLa0.5,2,159,1.7e-76	CIDRa2.8,160,350,4.9e-96
S_L7_20_Contig5237_frame_-1	DBLd1,1,200,2.3e-44
NS_L7_32_Contig14900_frame_3	DBLd1,1,434,2e-137	CIDRg9,441,687,4.1e-120	DBLz6,725,1139,8.5e-212	DBLe9,1144,1465,1.2e-170
NS_L8_54_Contig8468_frame_1	DBLb5,1,161,3.1e-54	DBLd1,180,378,6.4e-69
S_L7_42_Contig5362_frm1_orf14	DBLa0.12,3,104,1.2e-29	CIDRa2.2,105,349,1.6e-110	DBLd3,434,942,2e-187	CIDRg2,943,1202,7.3e-130	DBLz6,1237,1655,2.4e-225	DBLe6,1660,1980,1.6e-164
S_L8_56_Contig1533_frame_1	NTSB,9,63,4.7e-16	DBLa0.11,74,340,4.3e-131
NS_L1_84_Contig10026_frame_1	DBLd1,1,36,8.4e-05	CIDRb1,38,286,1.1e-96
S_L8_68_Contig6807_frame_-1	DBLd1,1,143,7.4e-50	CIDRb1,144,399,4.1e-109
S_L7_16_Contig1500_frame_-1	DBLa0.9,1,114,8.1e-49	CIDRa2.3,115,228,4.9e-48
S_L8_56_Contig6184_frame_1	DBLa0.1,1,148,5.9e-61	CIDRa3.2,149,420,9.5e-110	DBLd1,513,1063,1.7e-175	CIDRg1,1064,1150,2.3e-32
NS_L8_59_27698_frame_-2	DBLa1.1,1,36,1.8e-09	CIDRa1.6,37,288,4.4e-121	DBLb1,297,784,8.2e-214	DBLg13,799,1183,1.2e-156	DBLg10,1203,1559,1.5e-137	DBLd1,1682,2122,7.5e-160	CIDRb1,2123,2381,4.2e-100	CIDRa3.1,2433,2469,9.1
NS_L7_44_Contig2522_frame_3	DBLd1,1,253,1e-95	CIDRb6,254,296,3.1e-05
NS_L6_18_Contig11445_frm2_orf0	DBLe10,1,188,5.7e-70	DBLd4,290,374,0.21
NS_L7_35_Contig5491_frame_-1	DBLa0.5,1,169,2e-81
NS_L6_18_Contig14527_frame_-1	DBLa0.6,2,238,8.9e-117
NS_L7_19_Contig10809_frame_-1	DBLz2,1,151,8.5e-55	DBLe6,156,393,4.7e-112
NS_L1_88_Contig16230_frame_3	DBLd6,7,194,2e-79
NS_L1_80_Contig35880_frame_-3	DBLb5,3,217,6.4e-98
NS_L1_80_Contig31773_frame_-3	DBLg11,11,253,1.9e-101
S_L8_56_Contig7456_frame_3	DBLg17,18,376,5.3e-162	CIDRa3.1,481,501,20.0	DBLd1,529,1071,7.3e-168	CIDRb3,1073,1327,4.1e-102
S_L7_20_Contig19_frame_-3	DBLd1,12,175,3.8e-62
NS_L6_18_Contig6761_frame_-3	DBLa0.1,3,164,7e-77	CIDRa3.2,165,227,5.3e-19
S_L7_20_Contig5449_frame_3	DBLe1,20,172,2e-65	DBLg13,179,239,3.4e-21
NS_L6_24_Contig8817_frame_-2	DBLg18,2,86,1.6e-40	DBLe8,117,409,1.2e-148
S_L8_56_Contig7359_frame_2	DBLb11,1,130,2.1e-80	DBLg1,154,231,6.9e-35
NS_L8_54_Contig10494_frame_3	DBLd1,1,169,4.4e-67	CIDRb5,171,418,2.4e-109
NS_L7_29_Contig7165_frame_3	DBLb5,12,450,1.2e-188
NS_L6_21_Contig12454_frame_1	DBLd1,1,494,6.4e-164
NS_L8_51_Contig6144_frame_-2	DBLa0.19,1,72,3.3e-21	CIDRa2.5,74,217,4.6e-64
NS_L1_95_Contig9189_frm1_orf4	NTSB,12,69,3.2e-13	DBLa0.4,75,260,4.4e-89
S_L8_68_Contig4879_frame_-2	DBLb9,2,204,1.9e-101	DBLg11,218,304,2.2e-31
S_L7_20_Contig5368_frame_3	DBLa0.20,1,195,4e-93	CIDRa3.1,196,505,3.3e-118
S_L8_56_Contig1555_frame_1	DBLz3,1,221,2.1e-83
NS_L7_29_Contig916_frm-1_orf0	DBLepam5,52,348,3.9e-190	DBLe10,395,698,1.5e-139	DBLz3,718,1144,1e-140	DBLe12,1149,1457,2.6e-78	DBLe10,1481,1781,3.8e-129	DBLd4,1884,1968,0.77
NS_L6_18_Contig12427_frame_3	CIDRa3.1,4,119,2.2e-35	DBLd1,216,706,1.4e-171	CIDRb5,707,954,4.1e-112
NS_L8_50_Contig3838_frame_2	DBLd1,1,78,3.1e-19	CIDRb1,79,194,9.5e-43
S_L8_56_Contig2724_frame_-1	DBLz6,1,17,0.29	DBLd9,35,452,3.4e-215	CIDRg2,453,707,1.9e-123	DBLg3,756,1136,1e-169	DBLz4,1145,1565,4.3e-220
NS_L8_51_Contig7155_frame_1	CIDRg7,17,271,5.9e-118
NS_L8_55_Contig5132_frame_3	DBLa0.16,1,109,7.8e-45	CIDRa6,110,218,5.5e-30
NS_L6_18_Contig7677_frame_1	DBLz1,1,12,0.099	DBLe5,19,181,1e-95
S_L7_20_Contig6462_frame_3	CIDRb1,1,146,4.8e-65
NS_L6_24_Contig5079_frame_3	CIDRa1.5,4,85,5.7e-28	DBLb7,101,559,7.3e-167	DBLg13,577,723,4.1e-59
S_L3_13_Contig6077_frame_3	CIDRa3.2,1,145,2.2e-66	DBLd1,233,670,1.5e-141
NS_L1_84_Contig9281_frame_3	NTSA,19,96,3e-23	DBLa1.4,97,361,5.9e-147
NS_L8_59_Contig6332_frame_3	CIDRg5,2,87,1.8e-24
NS_L8_54_Contig10445_frm3_orf0	DBLa0.1,1,112,1.2e-39	CIDRa3.1,113,241,1.9e-45
S_L7_20_Contig4879_frame_3	DBLd1,1,171,9.3e-68	CIDRb1,172,421,1.4e-100
NS_L6_18_Contig7841_frame_-1	CIDRa2.4,4,193,8.8e-85
NS_L6_24_Contig7919_frame_1	NTSB,14,82,3.1e-13	DBLa0.9,83,389,3.4e-142
NS_L7_32_Contig5615_frame_2	DBLd1,101,254,6.5e-42
S_L6_19_65324_frame_1	DBLa0.15,7,290,3.6e-129	CIDRa3.2,291,591,1.4e-121	DBLd1,672,709,4.6e-09
NS_L7_19_32645_frame_1	CIDRa1.5,2,25,0.0053	DBLd1,113,642,1.7e-166	CIDRb1,643,900,1.1e-102
NS_L1_95_Contig8775_frame_2	DBLb5,1,412,3.1e-169	DBLd1,509,842,3.2e-123
S_L8_56_33619_frm-1_orf1	DBLa0.9,70,471,9.5e-185
NS_L8_59_Contig6385_frame_2	DBLa0.9,1,313,7.9e-131	CIDRa3.1,314,375,1.3e-18
NS_L8_51_Contig5180_frm1_orf9	NTSA,11,87,8.8e-23	DBLa1.1,88,486,9.2e-238	CIDRa1.2,487,738,6.8e-181	DBLb11,747,1238,0.0	DBLg1,1262,1616,1e-215	DBLe1,1635,1995,1.8e-207	DBLg8,2078,2453,2.4e-234	DBLz1,2477,2899,7.8e-271	DBLe5,2906,3230,4.6e-205
NS_L1_88_Contig2248_frame_-3	DBLd1,12,232,2.4e-68
NS_L1_95_37625_frame_2	CIDRa3.1,2,308,5.4e-126	DBLd1,377,776,9.9e-147
NS_L7_44_Contig5033_frame_2	CIDRb1,2,100,1.6e-29
NS_L1_88_Contig8721_frm-3_orf4	NTSB,10,64,4.1e-11	DBLa0.4,67,226,2.9e-77
NS_L1_95_Contig3280_frame_2	DBLa0.22,1,108,6.2e-37	CIDRa2.2,109,248,3.1e-64
NS_L7_27_Contig6060_frame_-1	CIDRb5,4,153,1.3e-63
NS_L6_18_Contig8711_frame_2	DBLpam2,1,32,2.8e-13	CIDRpam,41,268,4e-136	DBLpam3,287,523,5.5e-143
NS_L7_29_Contig7064_frame_2	DBLb3,2,202,7.6e-81
NS_L6_18_47607_frame_-1	NTSB,8,67,3.8e-16	DBLa0.15,72,210,7.1e-58
S_L6_19_Contig12452_frame_1	DBLd1,49,538,5.2e-175	CIDRb1,539,612,2e-20
NS_L1_80_Contig36213_frame_-1	NTSA,4,77,1.2e-22	DBLa1.2,79,406,1.6e-181
NS_L1_80_Contig24286_frame_1	CIDRa2.2,2,76,2e-22	DBLd1,170,244,2e-25
NS_L8_60_Contig7279_frame_-2	DBLg15,1,230,5.2e-131	DBLe1,248,584,8.9e-197	DBLg8,706,1075,7.1e-214	DBLz2,1089,1512,1.5e-216	DBLe5,1518,1853,3.9e-194
S_L8_56_33605_frm1_orf76	CIDRa3.4,2,49,2.7e-08	DBLd1,139,649,4.9e-171	CIDRg7,650,899,3.6e-114
NS_L7_17_Contig2860_frame_3	DBLd1,1,119,2.8e-37	CIDRb1,120,382,1e-106
NS_L8_59_35831_frame_-3	NTSB,15,83,4.1e-17	DBLa0.15,84,415,4.7e-142
NS_L1_80_Contig36366_frame_-2	DBLb8,3,41,2.3e-10	DBLg9,50,431,3.3e-135	DBLz1,455,705,6.6e-115
S_L7_42_Contig5451_frame_-2	DBLa0.1,1,128,3.2e-51	CIDRa3.3,129,435,3e-125	DBLd1,524,868,7.4e-99
S_L8_68_Contig5938_frame_3	CIDRb5,1,96,3e-37
NS_L1_88_Contig15780_frame_-3	CIDRg5,3,257,8.4e-116
S_L8_68_Contig6731_frame_3	CIDRa2.9,1,161,1.4e-65
NS_L1_73_Contig37800_frame_-2	DBLd1,14,436,4.1e-141	CIDRb1,437,690,1.4e-109
S_L7_20_Contig6421_frame_2	DBLb9,7,232,1.7e-85
NS_L7_17_Contig5428_frame_1	CIDRb5,1,135,2.6e-64
S_L7_20_Contig6498_frame_3	CIDRa3.2,1,161,1.3e-77	DBLd1,241,325,2.2e-20
S_L8_68_Contig5987_frame_2	CIDRg5,1,193,9.1e-100
NS_L1_73_Contig6465_frame_3	DBLd1,1,91,5.8e-25	CIDRb1,94,349,8.9e-98
NS_L1_80_Contig35648_frame_-2	NTSB,15,77,3.1e-13	DBLa0.14,78,166,3.7e-39
S_L7_16_27000_frame_-1	CIDRb1,5,169,1.3e-69
S_L7_20_Contig5183_frame_3	DBLb1,1,105,5e-25
NS_L6_18_Contig14698_frame_2	DBLg10,9,69,9.9e-23	DBLd1,85,223,2.3e-38
NS_L7_32_Contig14798_frame_-2	DBLb12,9,285,5.7e-120
S_L8_56_Contig2694_frame_1	DBLd4,2,114,4.2e-33	CIDRg9,115,387,1.2e-120	DBLb6,468,519,3.5
NS_L7_32_Contig10039_frame_1	DBLa1.1,1,76,5.1e-30	CIDRa1.5,77,205,1.4e-67
NS_L7_29_Contig2112_frm2_orf22	DBLe7,136,236,5e-12
NS_L8_50_Contig1847_frm2_orf3	NTSpam,18,68,4.7e-32	DBLpam1,69,449,2.4e-235	DBLpam2,549,995,6.9e-265	CIDRpam,1004,1231,7.5e-140	DBLpam3,1250,1603,1.6e-235	DBLepam4,1604,1943,8.5e-228	DBLepam5,2021,2324,8.7e-194	DBLe10,2372,2675,4.4e-161
NS_L6_21_Contig12048_frame_-3	DBLpam2,1,281,9.7e-167
S_L7_20_Contig6571_frame_-3	DBLd1,1,465,2.4e-160	CIDRb1,466,715,3.2e-105	CIDRa3.1,772,790,3.0
NS_L1_84_Contig4501_frame_-3	DBLd7,2,68,6.5e-13	CIDRb1,69,328,1.2e-103
S_L7_42_Contig5425_frame_2	NTSB,24,82,2e-14	DBLa0.6,88,335,5.1e-119
NS_L6_24_Contig7884_frame_3	CIDRg4,1,139,1.8e-63
NS_L1_84_Contig9689_frame_2	CIDRa2.1,1,147,1.6e-68	DBLd1,221,607,1.1e-117
S_L7_42_Contig6265_frame_3	DBLa0.22,1,147,8.6e-70	CIDRa3.1,148,449,1.7e-112	DBLd1,550,628,3.2e-19
NS_L8_54_Contig10455_frame_3	DBLepam4,1,115,4.1e-81	DBLb13,129,189,0.16	DBLepam5,193,301,8e-70
NS_L8_50_Contig7145_frame_2	DBLa0.5,2,195,2.7e-89	CIDRa2.3,196,316,1e-53
NS_L7_32_Contig14833_frame_-3	NTSB,48,105,1.4e-15	DBLa0.5,108,364,2.7e-122
S_L7_42_Contig5438_frame_3	DBLa0.9,1,399,1.5e-188	CIDRa2.1,401,645,2.6e-103	DBLd1,713,909,4.5e-65
NS_L1_84_Contig10048_frame_-3	NTSB,14,69,3.2e-14	DBLa0.13,78,512,1.6e-203	CIDRa2.3,513,796,2.6e-110	DBLd5,857,1254,1.6e-173	CIDRb4,1256,1506,2.6e-108	DBLb9,1545,1998,1.5e-202	DBLg9,2012,2213,4.8e-74
NS_L6_18_Contig2499_frame_-3	DBLd1,9,354,3.1e-129
S_L7_20_31966_frame_3	DBLe14,1,39,9.3e-15
S_L8_56_Contig7447_frame_-2	DBLd1,2,287,3.4e-103	CIDRb7,288,546,1.6e-96
S_L8_68_Contig5993_frame_-3	DBLg5,1,123,7.2e-49	DBLd1,208,272,7.1	DBLd1,290,345,1.9e-17
S_L8_56_Contig7360_frame_1	DBLd4,2,117,5.3e-35	CIDRg2,118,232,6.7e-39
NS_L7_35_Contig6363_frame_-1	NTSB,59,124,2e-11	DBLa0.19,126,576,4e-196	CIDRa2.5,577,740,5.7e-60
NS_L7_27_Contig3697_frame_1	CIDRb1,1,220,3.9e-94
NS_L6_21_Contig8522_frm2_orf0	NTSB,5,62,1.6e-15	DBLa0.7,63,208,3.6e-75
S_L6_19_Contig10870_frame_-3	CIDRa2.4,2,116,1.1e-42	DBLd1,208,698,7.4e-162	CIDRb1,699,949,8.6e-96
NS_L7_19_Contig7509_frame_-1	NTSA,5,72,2.6e-22	DBLa1.1,73,193,1.2e-71
NS_L8_54_Contig10511_frame_3	DBLa0.1,1,184,5.7e-84	CIDRa4,185,446,4.4e-80	DBLd1,527,1013,1.1e-164	CIDRb5,1014,1264,7.9e-117
NS_L8_59_Contig6350_frm-1_orf7	NTSA,11,84,7.3e-24	DBLa1.2,85,192,1.2e-55
NS_L6_21_Contig12488_frame_-2	DBLd1,1,163,6.5e-59	CIDRb1,164,414,5.6e-102
S_L8_68_Contig4390_frame_-1	DBLb5,1,249,8.6e-101
NS_L7_27_Contig7009_frame_-1	DBLa0.22,1,119,3.3e-46	CIDRa3.3,120,334,2.5e-98
NS_L7_29_Contig2955_frame_-3	DBLd1,136,193,2.3e-19
NS_L7_29_31435_frame_1	DBLa0.5,1,300,2.7e-142	CIDRa2.8,301,565,8.4e-108	CIDRa3.1,602,621,13.0	DBLd1,662,1065,6.3e-141
NS_L8_54_Contig10457_frame_-2	DBLa0.20,1,151,1.7e-62	CIDRa3.4,152,287,1.8e-51
S_L3_13_Contig7245_frm-1_orf3	NTSB,5,68,3.8e-13	DBLa0.1,71,519,6.3e-210	CIDRa3.1,520,836,5.2e-121	DBLd1,923,1457,1.2e-167	CIDRb1,1458,1720,1.2e-107
NS_L6_18_Contig14687_frame_2	DBLd1,12,230,5.9e-56
S_L7_42_28588_frame_3	CIDRb1,1,185,6.7e-78
NS_L7_27_Contig7030_frame_-3	DBLa0.1,1,199,3.6e-99	CIDRa3.3,200,435,2.3e-98
NS_L8_54_Contig9640_frame_-1	NTSB,32,97,3.7e-14	DBLa0.11,98,539,4.1e-201	CIDRa2.2,540,788,2e-101	DBLd1,866,1275,5.7e-115
NS_L1_84_Contig9679_frame_-3	DBLg3,1,327,1.4e-164	DBLz4,336,504,1.9e-66
NS_L6_21_Contig3575_frame_3	CIDRa3.1,4,42,2.7e-08	CIDRa3.1,87,107,7.8	DBLd1,140,180,3.4e-09
NS_L1_73_Contig25106_frame_3	DBLb8,4,127,9.5e-41	DBLg13,141,206,7.7e-22
NS_L6_20_Contig14692_frame_-2	CIDRa5,1,199,2.1e-100
S_L8_68_Contig5764_frame_3	DBLa0.1,2,248,3.5e-111
NS_L8_60_Contig17892_frame_1	DBLd4,1,186,8.2e-82
S_L6_19_Contig12077_frame_-1	DBLa0.8,1,204,8e-97
NS_L6_18_Contig16079_frame_1	DBLd1,4,208,2.2e-76	CIDRb1,210,484,5.9e-106
NS_L6_21_Contig11189_frame_3	DBLa0.1,1,147,9.9e-66	CIDRa3.1,148,458,2.4e-131	CIDRa3.1,488,512,8.5	DBLd1,535,691,3.9e-42
NS_L8_50_Contig7146_frame_-3	DBLa0.19,2,77,2.5e-20	CIDRa2.9,78,366,9.7e-121	CIDRa3.1,405,421,5.2	DBLd1,465,500,9.9e-08
S_L6_19_Contig12451_frame_-2	CIDRa3.1,20,320,5.1e-121
S_L7_16_27122_frame_3	DBLd5,12,181,2.4e-70	CIDRb4,183,428,1e-110	CIDRa3.1,491,511,9.3
S_L8_68_132394_frame_1	DBLb12,17,206,8.9e-59
S_L7_16_Contig5060_frame_3	DBLe3,1,179,4.7e-89
NS_L6_18_Contig11694_frame_2	CIDRa6,3,175,3e-87
NS_L7_29_Contig7166_frame_-2	NTSB,22,87,1.6e-10	DBLa0.1,88,463,9.8e-173
NS_L1_80_Contig35390_frame_-1	CIDRa2.2,6,254,2.2e-113	DBLd1,333,430,7.3e-25
S_L8_56_33545_frame_2	DBLe2,1,92,3e-34	DBLe7,104,387,3.2e-138	DBLe3,432,731,3.1e-157
NS_L7_19_30593_frame_-1	DBLepam5,1,134,1.6e-75	DBLe10,182,263,7.9e-45
NS_L7_32_Contig8422_frame_-1	DBLe4,1,313,2.9e-118
S_L8_68_Contig6755_frame_-1	DBLz5,2,216,5.2e-113
S_L8_68_Contig4170_frame_1	DBLd1,34,184,1.2e-43
S_L7_20_Contig5284_frame_1	DBLd1,3,106,1.5e-36	CIDRb6,108,241,8.3e-57
NS_L7_27_Contig4394_frm2_orf45	DBLa0.1,5,142,8.2e-50	CIDRa3.4,143,199,1.6e-19
NS_L7_44_Contig10343_frame_-2	DBLa0.18,1,82,3.6e-23	CIDRa4,83,334,7.9e-76	DBLd1,406,919,6.5e-167	CIDRb1,920,1169,5.6e-99
NS_L1_88_Contig16877_frame_-1	CIDRa2.10,1,51,7.6e-12	DBLd1,148,195,2.6e-11
NS_L6_21_Contig5720_frame_-3	NTSA,51,121,1e-17	DBLa1.5,122,510,2.8e-193	CIDRd1,511,664,5.4e-82
S_L8_56_Contig6307_frame_2	DBLa0.16,1,204,9.6e-100
S_L8_68_Contig5984_frame_3	DBLd1,8,185,8.5e-70	CIDRb1,186,435,1.5e-101
NS_L7_35_Contig6372_frm3_orf2	NTSB,5,78,3e-14	DBLa0.1,79,530,1.9e-198	CIDRa3.1,531,845,9.4e-129	DBLd1,919,1454,8.2e-175	CIDRb1,1455,1708,4.2e-108
NS_L6_20_Contig14611_frm-2_orf0	CIDRa3.2,2,55,4.3e-12	CIDRa3.1,84,99,13.0	DBLd1,129,609,3.8e-155
NS_L6_21_84875_frame_-3	DBLd1,1,145,5.7e-52	CIDRb6,146,192,2.1e-13
NS_L7_44_Contig10286_frame_2	DBLd1,14,306,2.3e-97	CIDRb1,307,474,8e-74
NS_L1_95_Contig8056_frame_-2	CIDRa3.1,2,148,1.6e-43	DBLd1,217,602,9.2e-140
S_L7_42_Contig4491_frm-2_orf0	DBLg10,81,468,5.6e-157
NS_L8_59_Contig5292_frame_1	DBLd1,93,272,3.6e-67
NS_L8_54_Contig7141_frame_-2	CIDRa2.1,1,168,1.1e-67	DBLb12,182,288,4.8e-26
NS_L1_80_Contig36088_frame_2	DBLd1,1,297,8.8e-87
NS_L8_54_35666_frame_3	DBLa0.5,1,278,2e-130
NS_L8_55_Contig1108_frame_3	CIDRa3.1,1,198,2.3e-81
NS_L1_73_Contig32275_frm3_orf14	DBLg11,14,165,3.1e-62
NS_L6_24_Contig8810_frame_-2	NTSB,27,81,8.6e-13	DBLa0.16,82,507,1.4e-214	CIDRa3.4,508,669,2.5e-70
NS_L1_88_Contig13659_frame_1	DBLe6,1,122,1.6e-54
NS_L7_29_Contig2885_frame_-1	DBLg13,39,180,2.6e-54
S_L7_20_Contig5270_frame_3	CIDRg5,1,91,1.4e-27
NS_L8_50_Contig6551_frame_2	DBLb2,4,67,5.4e-21	DBLg13,78,432,5.3e-142	DBLz1,456,878,3e-184	DBLe14,884,1228,5e-166
NS_L1_80_Contig33236_frame_-3	DBLd1,2,202,1.4e-76
NS_L6_21_Contig12472_frame_-1	DBLd1,1,429,3.7e-151
NS_L1_80_Contig828_frm3_orf5	NTSA,11,87,3.5e-23	DBLa1.1,88,486,9.8e-238	CIDRa1.2,487,738,1.3e-181	DBLb11,747,1238,0.0	DBLg1,1255,1534,3.2e-151
NS_L7_32_40746_frame_1	DBLd4,1,36,4.3e-08	CIDRg7,37,299,5.2e-125
S_L8_68_Contig6836_frame_-1	NTSB,24,79,4.6e-13	DBLa0.13,86,523,1.4e-210	CIDRa2.3,524,781,6.1e-98	DBLd1,867,908,1.4e-09
S_L8_68_Contig6837_frame_1	DBLa0.19,2,69,9.3e-17	CIDRa2.2,70,323,7e-113	DBLd1,408,946,3.8e-159
S_L3_13_Contig7207_frame_3	DBLg3,4,28,0.0014	DBLd1,52,551,1.3e-153
NS_L1_88_Contig16723_frame_-3	DBLb8,86,181,6.3e-23
S_L8_56_Contig7337_frame_-3	DBLg10,1,230,2.5e-94	DBLd7,250,269,0.0014
S_L7_20_Contig2094_frame_-3	CIDRa2.5,2,94,1.8e-28	DBLd1,174,293,2.7e-42
S_L8_68_Contig6790_frame_-1	DBLa0.1,1,124,1.8e-41	CIDRa3.2,125,300,4.1e-78
NS_L7_32_Contig14776_frame_-2	CIDRa1.8,13,115,1.2e-38	DBLb12,121,244,1.4e-43
NS_L1_95_Contig9211_frame_3	CIDRb1,4,166,3.1e-69	CIDRa3.1,174,213,1.1
S_L6_19_Contig11227_frame_-2	DBLd1,1,543,1.1e-147	CIDRb1,544,799,1e-111
NS_L1_84_Contig9319_frm-2_orf0	DBLd1,1,146,9.7e-55	CIDRb6,147,303,1.4e-74
S_L8_56_Contig7355_frame_2	DBLd1,16,229,4.1e-69
NS_L1_88_Contig11666_frm2_orf4	NTSB,8,62,6.6e-15	DBLa0.23,64,162,1.1e-35
NS_L1_84_Contig10090_frame_2	DBLd1,4,207,2e-75	CIDRb6,209,454,4.4e-106
NS_L7_19_Contig10736_frame_-3	CIDRb1,1,43,5.3e-11
S_L6_19_Contig7752_frame_2	DBLa1.6,2,164,3.5e-69
NS_L8_59_Contig2200_frame_-2	CIDRpam,1,138,1.2e-87	DBLpam3,157,283,8.1e-81
NS_L1_80_Contig35991_frame_-1	DBLb10,2,81,1e-28	DBLd1,160,250,7.7e-24
NS_L1_80_Contig36176_frm-3_orf5	NTSA,9,82,1.2e-26	DBLa1.7,83,344,1.5e-134
S_L6_19_Contig12431_frm-2_orf5	CIDRa1.4,6,43,1.9e-14	DBLb3,52,453,1.8e-172
NS_L8_59_Contig5608_frame_3	CIDRb1,1,130,5.2e-51	DBLz6,178,618,2.8e-209	DBLe6,623,946,1.8e-144
NS_L8_51_57038_frame_-1	NTSB,20,79,1.3e-16	DBLa0.9,80,200,1.8e-63
NS_L6_21_Contig12246_frame_-3	CIDRa3.1,2,65,4e-18	CIDRa3.1,92,116,1.3	CIDRa3.2,118,174,3.2
NS_L6_24_Contig8808_frame_3	CIDRa3.2,1,165,5.4e-81	CIDRa3.1,188,210,10.0	DBLd1,248,635,1.1e-119
NS_L7_29_Contig7918_frame_2	DBLz4,1,47,1.6e-19
NS_L7_19_Contig10827_frame_-2	DBLd1,1,121,5.2e-43	CIDRb1,124,378,7.3e-100
NS_L1_95_Contig9174_frame_3	DBLe5,1,146,5e-92
S_L8_56_Contig2425_frame_1	CIDRb1,2,115,1.5e-42	CIDRa3.4,146,175,0.29
NS_L6_24_Contig8721_frame_-3	DBLe7,1,195,1.7e-99
S_L7_16_Contig1407_frame_-1	CIDRa1.1,2,170,1.3e-95	DBLb12,180,452,9.6e-108
NS_L8_65_24616_frame_1	NTSB,40,95,5.6e-14	DBLa0.15,100,238,1.2e-57
S_L8_56_Contig5160_frame_3	DBLb1,6,219,1.1e-97	DBLb6,237,685,3.2e-202	DBLg11,702,794,3.4e-35
S_L7_20_Contig6485_frame_2	DBLg11,1,234,1e-79	DBLd5,261,300,4.9e-13
NS_L7_29_31053_frame_3	DBLd4,1,52,4.8e-13	CIDRg2,53,302,2.2e-116
NS_L1_84_Contig10081_frame_2	CIDRa2.1,1,147,2.1e-71	DBLd1,225,484,1.6e-74
S_L3_13_39356_frame_-2	DBLd1,2,430,4.9e-154	CIDRb1,433,665,2.8e-93
S_L8_56_Contig7455_frame_2	CIDRa3.2,1,143,4.7e-58	CIDRa3.1,172,198,5.0	DBLd1,235,803,2.3e-174	CIDRb1,804,1069,9e-96
NS_L8_54_Contig10512_frame_-2	NTSB,83,138,8.4e-12	DBLa0.18,141,538,5.8e-190	CIDRa5,539,789,6.8e-109	DBLb5,813,1280,9.7e-187	DBLg3,1294,1663,3.4e-163	DBLz4,1672,2091,2.6e-216
S_L8_68_Contig6693_frame_-2	DBLd1,1,173,2.1e-60
NS_L1_84_Contig10111_frm1_orf3	NTSB,10,72,8.8e-12	DBLa0.11,73,506,9.2e-203	CIDRa2.4,507,748,7e-110	DBLd1,830,1292,3.5e-173	CIDRg7,1293,1559,1.9e-111
S_L7_16_Contig4758_frame_-2	DBLd1,1,152,2.6e-56	CIDRb1,153,276,1.1e-50
NS_L1_95_Contig9170_frame_-1	CIDRg10,2,136,1e-51
S_L7_16_Contig2380_frame_1	CIDRg3,1,154,1.4e-72	DBLb6,187,219,0.021
NS_L7_35_Contig6369_frame_3	NTSB,47,109,3.6e-17	DBLa0.9,110,523,3.1e-199	CIDRa2.1,524,777,7.3e-99	DBLd1,847,1080,7.2e-68
NS_L6_24_Contig8685_frame_-3	CIDRg10,1,45,4.3e-10
NS_L8_59_27658_frame_-2	NTSB,33,87,1.5e-11	DBLa0.16,89,533,1.2e-211	CIDRa3.4,534,850,2.4e-142	DBLd1,930,1315,7.2e-120
NS_L8_50_Contig3802_frame_-3	DBLa0.8,1,94,1.9e-32	CIDRa5,95,189,1.3e-33
NS_L1_73_Contig25134_frame_-3	DBLd5,1,254,2.9e-86
NS_L7_27_Contig7066_frame_-2	DBLb3,22,378,1.5e-151	DBLg2,394,786,1.5e-146	DBLg4,794,1165,1.3e-152	CIDRa3.1,1179,1225,18.0	DBLd1,1326,1815,5.6e-160	CIDRb1,1817,2045,3.9e-97
S_L7_42_Contig5450_frame_2	DBLb6,41,388,4.4e-147	DBLg2,405,786,1.2e-150	DBLg4,803,826,0.17
NS_L7_19_Contig10826_frame_-2	DBLd1,1,118,3.9e-39	CIDRb6,119,365,2.3e-109
NS_L1_88_Contig17028_frm1_orf41	DBLa0.4,1,159,9.6e-65	CIDRa4,160,414,6.7e-107	DBLb5,436,912,5.7e-181	DBLg9,926,1298,4.4e-137
NS_L7_29_Contig7187_frame_3	DBLa0.19,1,107,3.2e-34	CIDRa2.8,108,372,1.1e-107	CIDRa3.1,409,428,16.0	DBLd1,469,929,1.1e-159	CIDRb1,931,1186,3.3e-98
S_L7_20_Contig3401_frm-3_orf0	DBLa1.4,1,162,2.7e-79	CIDRa1.7,163,379,1.7e-115
NS_L6_21_Contig12494_frame_-2	DBLd1,1,370,1.3e-133	CIDRb1,371,578,3.7e-86
NS_L8_65_Contig5599_frame_3	DBLa0.15,2,197,2.7e-102	CIDRa3.2,198,490,5e-125	DBLd1,572,1099,6e-163	CIDRb1,1102,1352,4.4e-97	DBLg10,1455,1837,4.6e-158
S_L7_42_Contig1237_frame_-2	DBLd1,1,168,1.4e-56	CIDRb1,169,422,2.2e-102
NS_L6_18_Contig15992_frame_-2	DBLa0.5,77,404,1.6e-157
NS_L8_51_81035_frame_1	DBLa0.15,1,166,4.5e-65	CIDRa2.5,167,477,2.3e-109	CIDRa3.1,505,530,17.0	DBLd1,564,651,1.1e-23
S_L7_20_Contig5317_frame_3	NTSB,23,81,2.5e-16	DBLa0.23,88,285,1.7e-103
NS_L7_17_Contig2246_frame_3	DBLd4,1,140,5.6e-47	CIDRg9,141,411,4.8e-121
S_L7_42_Contig1116_frm-3_orf8	NTSA,11,87,6.1e-27	DBLa1.2,88,123,9.3e-13
NS_L1_80_Contig20957_frame_3	NTSB,43,109,4.2e-17	DBLa0.9,110,522,8.1e-204	CIDRa2.4,523,772,5.9e-97	DBLg10,820,1198,3e-148	DBLd1,1224,1716,3.6e-166	CIDRb1,1717,1879,1.5e-73
NS_L7_17_Contig2843_frame_1	DBLd5,9,176,1e-55
NS_L6_24_Contig7854_frame_3	DBLb12,6,222,9.5e-113
S_L3_13_Contig6073_frame_-1	DBLb1,1,87,2.6e-23	DBLb6,106,584,9.3e-194	DBLg2,602,994,1.1e-165	DBLd1,1158,1260,3.4e-34
NS_L7_29_Contig7941_frame_-3	CIDRb6,1,82,9.9e-23
NS_L7_17_Contig2738_frame_-3	DBLg13,8,185,3.8e-84
S_L3_13_Contig4559_frame_-2	DBLa0.11,2,110,4.5e-44	CIDRa2.4,111,345,3.6e-102	CIDRa3.1,368,392,12.0	DBLd1,431,480,7.6e-09
NS_L7_17_Contig5411_frame_-3	CIDRb3,1,179,5.6e-76
NS_L7_29_Contig7183_frame_-2	DBLd1,3,465,1.8e-151	CIDRg2,466,714,1e-107
NS_L1_80_Contig36095_frame_1	DBLd1,2,304,2.7e-89
S_L8_56_Contig5962_frame_-3	DBLz2,1,242,2.9e-129
NS_L7_29_Contig7184_frame_-2	DBLg14,1,219,3.1e-108	DBLz5,228,655,6e-223	DBLe4,661,967,3.2e-136
NS_L8_59_Contig6320_frame_-3	DBLa0.6,1,141,3.8e-64	CIDRa3.2,142,205,7e-24
S_L8_56_Contig2419_frame_3	CIDRb3,2,50,2.5e-13
NS_L8_54_Contig4345_frame_3	CIDRa3.4,3,145,2.2e-56	DBLd1,230,319,3.6e-25
NS_L6_24_Contig8830_frm-2_orf5	NTSA,11,88,5.4e-22	DBLa1.4,89,484,4.7e-219	CIDRa1.3,485,736,5.1e-184	DBLb1,745,1226,4.4e-267	DBLg15,1246,1591,1.9e-206	DBLe1,1609,1945,1e-180	DBLg8,2047,2423,2.9e-229	DBLz1,2447,2867,1.4e-269	DBLe5,2874,3198,2.2e-204
NS_L1_80_Contig33701_frame_-2	CIDRa2.10,3,131,4.2e-48	CIDRa3.1,165,189,0.59	DBLd1,213,715,2.8e-170	CIDRg7,716,975,9.2e-120
S_L8_56_Contig7119_frame_1	DBLg1,1,13,0.012	DBLe1,32,392,5.3e-209	DBLg8,475,541,1.4e-38
S_L7_42_Contig6289_frame_1	DBLa0.9,1,387,3.2e-188	CIDRa2.1,388,629,1.6e-102	DBLd1,708,1256,3.2e-169	CIDRb1,1257,1403,1.3e-56
NS_L8_50_Contig5582_frame_2	CIDRa3.1,1,108,5.8e-27	DBLd1,190,671,1.4e-164	CIDRg4,672,934,4.2e-126
NS_L7_44_Contig6921_frame_3	DBLg8,1,286,7.9e-160	DBLz1,310,597,4.2e-179
NS_L7_29_31263_frame_3	CIDRa5,1,110,4.8e-52	DBLb5,128,597,2.8e-197
NS_L1_80_Contig36427_frame_-1	DBLb1,1,462,2.1e-190	DBLg12,490,838,9.3e-141	DBLd5,843,1257,3.5e-193	CIDRb3,1259,1510,5.5e-108	DBLb6,1543,1908,1.1e-174
NS_L1_73_Contig13523_frame_1	CIDRg9,1,106,2e-44
NS_L1_95_Contig4336_frame_2	DBLd1,1,66,2.2e-14	CIDRb1,69,313,1.9e-99
S_L7_16_26740_frame_1	DBLa0.11,2,234,4.5e-114
S_L7_20_Contig6534_frame_-3	DBLd1,5,340,5.1e-123	CIDRb1,341,445,1.9e-40
NS_L1_80_Contig36299_frame_-2	DBLd1,1,77,4.9e-19	CIDRb7,81,330,8.4e-109
NS_L8_65_Contig5594_frame_3	DBLa0.7,1,176,1.2e-83	CIDRa4,177,454,1.3e-115	DBLd1,537,1026,3e-173	CIDRb1,1028,1281,2.1e-105
S_L7_42_Contig4481_frame_3	DBLa1.8,19,95,2.3e-26	CIDRg3,96,343,2.1e-107
NS_L8_65_Contig4009_frame_2	CIDRa2.1,1,102,1.6e-32	DBLb12,113,377,1.2e-113
S_L6_19_Contig8032_frame_1	NTSB,53,116,2e-10	DBLa2,125,516,1.4e-159	CIDRa1.1,517,767,3.6e-141	DBLb3,777,1227,8.4e-156	DBLg13,1280,1652,1e-139	DBLz1,1676,2093,6.8e-222	DBLe6,2099,2415,5.1e-123
S_L7_20_Contig662_frame_3	CIDRb6,1,92,3.1e-26
NS_L7_29_Contig2769_frame_-3	NTSB,35,91,2.6e-12	DBLa0.11,99,373,2.2e-143
NS_L7_19_Contig10636_frame_1	CIDRg12,1,150,6.3e-68	DBLg3,212,583,1.8e-175	DBLz4,592,1012,7.2e-222
S_L8_56_Contig7268_frame_-2	DBLe5,1,96,6.4e-59
S_L3_13_Contig2242_frame_1	DBLb2,1,367,1.1e-167	DBLg10,383,563,7.7e-76
NS_L1_73_Contig12776_frame_2	DBLb6,1,181,3.4e-81
NS_L7_19_Contig7722_frame_1	CIDRa2.8,3,145,7.6e-51	DBLb5,152,627,5.4e-195	CIDRa3.4,659,683,13.0	DBLd1,713,1181,5.4e-160	CIDRb1,1182,1327,2.3e-58
NS_L1_80_Contig7540_frame_3	NTSB,9,68,4.4e-15	DBLa0.9,69,472,1.4e-182	CIDRa6,473,724,1e-119	DBLb5,744,1063,5.5e-126
NS_L8_54_36384_frame_-3	DBLd1,2,171,2.4e-59	CIDRb5,174,420,3e-108
NS_L1_95_Contig7759_frame_-1	DBLa0.7,16,182,2.2e-79	CIDRa4,183,368,1.2e-92
NS_L8_65_25202_frame_3	DBLg9,2,35,0.0036	DBLz2,49,482,4.6e-163	DBLe4,489,793,1.7e-123
S_L7_20_Contig3345_frame_3	NTSB,42,101,7.3e-16	DBLa0.8,102,537,4.8e-209	CIDRa5,538,790,4.3e-114	CIDRa3.1,851,890,8.6	DBLd1,910,1388,7.2e-137
NS_L1_80_226053_frm-1_orf10	DBLa0.17,5,122,1.5e-45
S_L3_13_Contig7146_frame_3	DBLa0.15,24,297,1.6e-133
S_L8_56_Contig7420_frame_2	CIDRa3.4,1,130,4.8e-56	DBLd1,144,144,8.6	CIDRa3.3,156,196,14.0	DBLd1,211,595,1.9e-115
NS_L8_65_Contig5566_frame_-2	NTSB,56,116,1.1e-12	DBLa0.1,119,354,4.6e-100
S_L7_42_Contig6248_frame_-2	NTSB,33,102,5.2e-17	DBLa0.9,103,378,4.6e-135
S_L6_19_Contig8027_frame_2	CIDRb1,1,139,1.2e-53
NS_L7_29_Contig2285_frame_1	DBLd8,2,202,6.9e-111
S_L8_56_33397_frame_3	DBLd1,9,68,5.9e-15	CIDRb1,69,324,8.2e-101
NS_L6_21_43015_frame_3	DBLd1,3,66,1.2e-11	CIDRb1,69,321,1.1e-103
NS_L1_80_Contig36306_frame_1	DBLepam5,1,134,3e-76	DBLe10,181,489,7.3e-148
NS_L1_84_Contig9838_frame_2	CIDRb1,1,258,6.9e-103
S_L7_20_Contig3188_frame_-1	DBLa0.22,2,116,4.3e-38	CIDRa3.1,117,257,1.2e-50
NS_L6_20_Contig16284_frm3_orf8	NTSB,5,75,1.8e-13	DBLa0.5,77,524,7.1e-218	CIDRa2.3,525,685,5.6e-76
S_L7_42_Contig5459_frm-1_orf25	DBLe7,136,236,5e-12
S_L7_20_Contig5311_frame_3	DBLb9,2,175,6.9e-82	DBLg4,192,276,1.3e-29
S_L8_68_Contig6700_frame_-2	DBLb3,2,347,4.5e-143	DBLg5,366,588,2.9e-85
NS_L8_55_Contig3549_frame_1	NTSB,59,119,2.3e-14	DBLa0.9,120,535,4.8e-197	CIDRa2.1,536,792,4.5e-103	DBLd1,877,1395,5.7e-175
NS_L1_88_Contig11761_frame_-3	DBLg2,7,235,3.3e-91	DBLg4,252,334,3.7e-32
NS_L8_65_Contig1872_frame_-1	CIDRb5,1,167,5.5e-90
NS_L1_88_Contig11716_frame_1	DBLa1.2,42,272,3.1e-104
NS_L1_84_Contig10112_frame_1	NTSB,14,78,1.2e-13	DBLa0.19,82,512,2.8e-195	CIDRa2.8,513,783,2.1e-120	DBLd1,865,1418,7.4e-164	CIDRb1,1419,1665,2e-95	DBLg10,1749,2121,3.8e-155
NS_L8_59_Contig6389_frame_-1	DBLa1.1,2,101,4.3e-48	CIDRa1.7,102,352,1.2e-137	DBLb1,361,398,6.6e-08
S_L8_68_Contig4093_frame_1	CIDRg7,1,188,2.4e-93
S_L7_20_Contig5274_frame_3	CIDRg2,2,43,5.2e-10	DBLg17,90,431,9.6e-149	DBLz4,448,868,3.8e-230
NS_L7_19_Contig6101_frm1_orf13	DBLb1,4,82,9.5e-26
S_L7_16_Contig5052_frame_-3	DBLd1,4,324,1.1e-114
S_L7_20_Contig1361_frame_1	DBLe3,49,341,4.7e-76
S_L7_20_Contig6515_frame_3	DBLa0.20,1,140,2.3e-54	CIDRa3.3,141,456,9.1e-134	DBLd1,538,877,6.9e-98
NS_L6_20_Contig17316_frame_2	DBLz6,1,149,3.2e-79	DBLe6,154,274,3.4e-48
NS_L1_80_Contig36309_frame_3	CIDRa2.3,1,60,1.6e-17	DBLb13,66,518,3.5e-192
S_L8_68_Contig6781_frame_3	DBLg11,1,282,1.9e-115
NS_L6_18_Contig14779_frame_2	DBLd1,3,206,6.1e-74	CIDRg7,207,393,2.2e-95
NS_L7_32_Contig13941_frame_2	DBLd1,4,484,1.3e-173	CIDRg4,485,648,1.4e-81
S_L3_13_Contig7199_frame_2	DBLb3,1,331,2e-116	DBLg5,360,472,1.6e-39
S_L7_42_28850_frame_3	NTSB,25,92,2.4e-15	DBLa0.1,93,528,1.7e-206	CIDRa3.1,529,587,2.3e-20
NS_L1_80_Contig33545_frame_1	DBLd4,2,16,0.14	CIDRg1,17,270,1.8e-122
NS_L8_55_Contig5768_frm-1_orf4	NTSB,8,61,9.5e-12	DBLa0.4,67,483,8.2e-181	CIDRa6,484,730,7e-88	DBLd1,821,1323,3.6e-174	CIDRb1,1325,1573,3.3e-97
NS_L1_80_Contig34846_frame_-3	CIDRb6,1,131,2.6e-57
S_L7_42_Contig6186_frame_2	NTSB,34,97,4.6e-14	DBLa0.1,99,238,3.1e-53
NS_L7_29_30823_frame_-1	DBLa0.16,1,169,3.1e-84	CIDRa3.4,170,328,2.3e-64
S_L3_13_Contig6034_frame_3	DBLd1,1,88,3.1e-20	CIDRb1,89,321,1.7e-98
NS_L8_59_34999_frame_2	NTSA,2,73,3.1e-24	DBLa1.2,74,222,3.8e-78
S_L3_13_Contig7185_frame_1	DBLe6,2,307,2.2e-131
NS_L1_80_Contig18175_frame_2	DBLg14,3,236,1.6e-98
NS_L7_29_Contig7982_frame_1	CIDRa3.1,5,30,1.1e-05	DBLd1,98,475,2.1e-118
NS_L1_80_Contig35678_frame_-1	NTSB,28,86,1.3e-15	DBLa0.11,87,180,5.2e-43
NS_L1_95_Contig9232_frame_-2	CIDRb1,2,242,8.5e-97
NS_L1_80_Contig36316_frame_1	DBLd4,1,164,6.1e-65	CIDRg1,165,453,4.2e-95
NS_L8_54_Contig4264_frame_3	DBLa2,2,123,2.5e-51	CIDRa1.1,124,376,4.5e-146	DBLb12,385,405,0.011
S_L8_68_Contig3147_frm-2_orf3	NTSB,11,65,1.7e-09	DBLa0.3,67,188,1.2e-55
S_L6_19_Contig11179_frame_1	DBLd1,2,307,2.5e-92
S_L6_19_Contig7931_frame_3	CIDRg9,1,39,1.1e-10
NS_L8_59_Contig2278_frame_1	DBLa0.1,2,107,2.2e-35	CIDRa5,108,373,2.5e-85
NS_L8_54_Contig10320_frame_-3	CIDRb1,1,183,9.2e-69
S_L8_68_Contig3196_frame_-3	DBLe4,13,317,4.5e-139
NS_L7_29_Contig8014_frame_3	DBLg5,4,217,3.6e-83	DBLd1,257,773,1.1e-178	CIDRb1,774,1031,8.6e-106
NS_L1_80_Contig33443_frm-2_orf0	DBLa0.1,2,164,9.1e-70
NS_L1_88_Contig17071_frame_-2	CIDRa1.4,1,93,8e-44	DBLb3,102,623,1.5e-204	DBLg2,669,1051,6.3e-154	DBLg4,1067,1439,7.6e-159
NS_L8_54_Contig3686_frame_2	CIDRpam,1,42,2.4e-22	DBLpam3,61,402,1.4e-223
NS_L7_29_Contig7053_frame_3	CIDRb6,3,71,1.4e-19
NS_L1_80_Contig32317_frame_1	DBLd1,1,172,1.9e-64	CIDRb1,173,432,1e-110	DBLz2,445,506,0.38
NS_L6_21_59419_frm2_orf0	DBLz6,2,324,8.9e-179
S_L8_56_Contig2627_frame_3	CIDRa2.4,29,129,1.7e-31	DBLd1,229,630,3.9e-130
S_L7_42_Contig6255_frame_-2	DBLd5,4,220,2e-76	CIDRb3,221,478,2.6e-106
NS_L6_21_Contig12301_frame_-2	DBLd1,1,85,1e-26	CIDRb1,86,200,1.5e-38
NS_L1_84_Contig7124_frame_-2	DBLg8,1,169,5.5e-81	DBLz1,193,592,1.5e-226
NS_L6_18_155418_frame_3	DBLepam4,1,138,4.3e-98	DBLb13,146,198,0.052	DBLepam5,215,238,2.7e-10
NS_L6_24_Contig5895_frame_3	DBLd4,4,260,1.2e-91	CIDRg1,261,443,6.7e-86
NS_L1_95_Contig9243_frame_3	DBLd1,2,74,6e-15	CIDRb1,75,334,1.4e-110
NS_L8_51_Contig7781_frame_2	DBLb5,1,149,1.1e-49	DBLd1,168,520,1.3e-119
NS_L7_35_Contig1641_frm1_orf0	CIDRa1.1,1,148,4.3e-86
NS_L1_88_Contig17049_frame_-1	DBLd7,1,161,5.8e-63	CIDRb6,162,416,7.8e-105
S_L8_56_Contig6045_frame_-3	CIDRb1,1,175,1.9e-81
NS_L6_20_Contig17195_frame_-1	DBLa0.24,25,166,7.4e-67
NS_L1_73_Contig15740_frame_-2	DBLd1,105,521,3.7e-136
NS_L1_80_Contig23933_frm2_orf22	DBLd2,12,64,2.6e-22	CIDRg6,65,321,2.7e-130
NS_L7_44_Contig7799_frame_-3	CIDRb1,1,191,3.9e-83
NS_L7_29_Contig7680_frame_1	DBLa0.1,5,92,4.9e-35	CIDRa3.2,93,230,1.8e-49
NS_L8_54_Contig4253_frame_-2	NTSB,5,54,1.5e-13	DBLa0.4,59,286,4.7e-107
NS_L8_65_Contig5587_frame_3	DBLd1,2,493,4.4e-171	CIDRg1,494,732,7.7e-103
NS_L1_88_Contig15628_frame_-1	CIDRa3.2,29,191,7.6e-64
S_L7_20_Contig6455_frame_-3	CIDRb1,1,136,2.1e-52
S_L7_20_33300_frame_-3	DBLa0.11,1,325,3.3e-141	CIDRa2.1,326,538,4.2e-88
NS_L6_18_Contig14573_frame_-2	DBLa0.12,1,171,1.6e-74
NS_L7_29_Contig7976_frame_-2	DBLb3,4,72,4.2e-19	DBLb1,73,368,2.7e-130
NS_L7_27_Contig6979_frame_-1	CIDRa3.1,1,153,9.8e-61	DBLd1,222,275,3.9e-11
NS_L1_95_Contig8065_frame_2	NTSB,14,77,1.6e-15	DBLa0.12,83,497,4.4e-187	CIDRa6,498,744,2.3e-101	DBLb8,761,812,2e-07
NS_L1_84_Contig8286_frame_2	DBLe1,1,99,5e-51
NS_L1_95_37773_frame_-1	DBLg1,3,110,3.2e-54	DBLe1,129,486,2.3e-202	DBLg8,581,950,1.1e-214	DBLz2,964,1387,4.2e-217	DBLe5,1393,1585,4.2e-94
S_L8_68_Contig6797_frame_-2	CIDRb1,1,144,1.9e-54
NS_L7_29_Contig3879_frame_3	CIDRa6,1,54,1.3e-09	DBLb5,86,535,4.8e-177
S_L7_20_Contig5302_frame_1	DBLd1,3,265,5.4e-84
S_L8_68_Contig6757_frame_-3	CIDRa2.1,1,97,9.5e-38	DBLb4,126,220,2.2e-31
NS_L7_27_Contig4022_frame_1	NTSB,2,108,1.9e-17	DBLa2,113,516,5.5e-174	CIDRa1.1,517,768,2.9e-142	DBLb12,777,1239,3.6e-224	DBLg4,1256,1620,1e-170	DBLd1,1750,2227,8.2e-164	CIDRb1,2228,2480,1.8e-99
NS_L7_27_Contig2285_frame_2	DBLd1,114,308,6.6e-67
NS_L1_80_Contig23256_frame_-3	DBLd1,31,76,2.6	DBLd1,81,341,2.6e-93
S_L8_56_Contig5607_frame_-3	CIDRa2.4,3,255,5.9e-122	CIDRa3.1,286,311,3.1	DBLd3,350,371,0.011
S_L6_19_Contig12372_frame_-1	NTSB,52,111,7.3e-14	DBLa0.8,112,418,1.4e-167
S_L8_68_Contig6009_frame_1	DBLd1,1,157,3.8e-60	CIDRb5,158,408,3.2e-115
S_L8_56_Contig6271_frame_2	DBLa0.17,1,144,6e-61	CIDRa3.3,145,183,2.8e-07
NS_L1_80_Contig36126_frame_2	CIDRa3.2,2,185,1.7e-84	DBLd1,289,326,3.5e-08
NS_L8_59_Contig5582_frame_-2	DBLa2,39,433,5.3e-173	CIDRa1.1,434,464,2.5e-09
S_L7_20_Contig6382_frame_-2	DBLd1,1,162,1.8e-59	CIDRb6,163,209,3.2e-09
NS_L8_51_Contig3009_frame_1	DBLa0.7,2,111,2.2e-44	CIDRa3.5,112,375,4.3e-88	DBLd1,467,630,2e-26
NS_L7_32_Contig14771_frame_-2	DBLg2,1,225,9.7e-102
NS_L8_51_Contig7718_frame_2	DBLz4,1,80,1.7e-41
NS_L6_18_Contig8208_frame_1	CIDRa2.2,5,52,8.1e-11	DBLd1,160,234,9.8e-25
NS_L6_21_Contig12477_frame_1	NTSB,36,88,1e-13	DBLa0.15,101,535,1.2e-199	CIDRa3.2,536,687,7.4e-62
S_L8_56_Contig6413_frame_1	NTSA,3,78,3.7e-20	DBLa1.1,79,475,3.2e-201	CIDRa1.4,476,674,4.7e-100
NS_L7_29_Contig7186_frame_1	DBLa0.20,1,189,3.8e-95	CIDRa3.1,190,492,6.2e-138	DBLd1,581,1068,3.7e-165	CIDRb5,1069,1118,2.1e-08
NS_L8_59_Contig6401_frame_3	DBLa0.5,1,396,6.3e-184	CIDRa2.3,397,522,1.7e-55
NS_L1_95_37763_frame_-3	DBLa0.1,5,420,1.8e-174	CIDRa3.2,421,712,7.8e-112	DBLg10,733,1101,1.4e-126	DBLd1,1126,1473,1.5e-101
S_L3_13_Contig6970_frame_-2	NTSB,33,104,1.4e-14	DBLa0.18,108,169,6.9e-28
NS_L7_17_Contig3822_frame_-2	DBLd1,2,218,4.7e-67
S_L8_68_Contig2153_frame_-3	NTSB,8,69,1.9e-12	DBLa0.21,72,475,1.4e-254	CIDRa2.1,476,523,6.3e-13
S_L8_56_Contig6375_frame_2	DBLg12,1,138,1.1e-77	DBLd5,143,283,5.2e-69
NS_L6_20_Contig17434_frame_2	DBLa0.22,1,132,2.5e-49	CIDRa3.1,133,451,4.1e-121	DBLd1,533,1108,2.8e-169	CIDRb1,1111,1254,6.5e-58
NS_L8_50_Contig5508_frame_-1	DBLd1,57,244,4.5e-57
NS_L8_50_Contig6329_frame_-1	DBLg10,1,300,3.5e-121
NS_L6_24_34089_frame_1	DBLd4,1,12,2.0	CIDRg1,13,250,3.3e-108	DBLe2,296,642,1e-171	DBLe7,654,744,3.4e-41
NS_L8_59_Contig2263_frame_1	DBLg9,2,158,2.1e-68	DBLz2,172,352,4.4e-79
NS_L1_73_Contig10741_frame_-2	DBLb12,1,218,5.6e-100	DBLg6,237,324,9.3e-32
NS_L1_80_Contig35921_frame_2	DBLpam3,1,261,9.5e-165
S_L7_20_Contig6519_frame_-1	CIDRa1.4,1,65,1.3e-28	DBLb1,74,378,1.8e-145
NS_L1_80_Contig35852_frame_2	CIDRa2.8,2,220,1.7e-103
NS_L8_65_24644_frame_-3	DBLe4,1,120,1.3e-23
NS_L6_21_Contig11207_frame_1	DBLd1,5,465,2.6e-153	CIDRb6,468,572,4.2e-36
S_L3_13_94600_frame_3	CIDRa3.1,2,140,8.3e-41
NS_L1_84_Contig10003_frame_-2	DBLe4,7,183,4.5e-79
NS_L1_95_Contig8037_frame_1	DBLd4,6,295,5.8e-145	CIDRg1,296,415,1.3e-60
NS_L6_24_Contig6789_frame_-2	DBLd1,2,163,1.2e-67	CIDRb1,164,308,1.4e-61
NS_L1_80_Contig36069_frame_3	CIDRg4,1,146,1.4e-62
NS_L8_50_Contig788_frame_-3	DBLb13,2,134,7.8e-52	DBLd1,226,637,4.3e-143
NS_L7_32_Contig14856_frame_-1	DBLb8,1,54,1.9e-19	DBLd1,180,426,2.9e-74
NS_L8_51_Contig3190_frame_1	NTSB,48,102,1.8e-14	DBLa0.15,110,544,8.8e-197	CIDRa3.1,545,842,1.8e-131	DBLd1,925,1325,2.2e-107
NS_L8_50_Contig5336_frame_-3	DBLd5,2,28,0.0009	CIDRb1,29,280,2e-111
NS_L7_29_Contig7978_frame_-1	DBLb3,2,293,4.7e-118	DBLg2,303,370,4.2e-22
S_L6_19_Contig11207_frame_2	NTSB,31,87,4.2e-15	DBLa0.22,94,413,2.3e-161
S_L3_13_Contig7201_frame_2	DBLd1,2,405,7.8e-143	CIDRg4,406,483,1.7e-24
NS_L7_32_Contig13866_frame_-2	CIDRg6,1,131,3.1e-49
NS_L1_80_Contig15336_frame_2	CIDRg6,2,160,3.5e-65	DBLz6,199,627,1.8e-221	DBLe9,633,949,7.3e-130
S_L7_16_63175_frame_3	DBLd1,1,234,6.1e-78
NS_L8_55_Contig1809_frame_-1	CIDRa3.3,11,72,1.2e-20	CIDRa3.4,111,137,17.0
NS_L8_54_37036_frame_-1	NTSB,32,97,3.7e-14	DBLa0.11,98,539,4.1e-201	CIDRa2.2,540,788,2e-101	DBLd1,866,1278,1.6e-117
NS_L8_59_Contig3435_frame_1	DBLpam2,69,258,3.3e-106
S_L3_13_Contig4040_frame_3	NTSB,25,77,1.7e-13	DBLa0.8,80,497,6.4e-183	CIDRa3.5,498,745,8.3e-150	DBLd1,831,1042,2.8e-67
NS_L7_29_Contig3471_frm1_orf5	NTSA,11,86,2.1e-21	DBLa1.1,87,484,3.2e-239	CIDRa1.2,485,736,9.1e-181	DBLb11,745,1236,0.0	DBLg1,1253,1610,1.1e-207	DBLe1,1629,1986,5.3e-202	DBLg8,2081,2450,2.6e-214	DBLz2,2464,2749,3.7e-145
NS_L7_32_154335_frame_-3	DBLb3,1,56,4.7e-14	DBLb6,57,182,4.2e-54
S_L6_19_Contig11034_frame_-1	CIDRa1.7,39,117,7.1e-21	DBLb12,126,193,4.6e-20
NS_L1_80_Contig23209_frame_1	DBLa0.1,1,172,4.3e-74	CIDRa3.1,173,202,9.2e-07
NS_L7_17_Contig2936_frm1_orf0	CIDRa3.2,13,216,9.8e-93
S_L8_56_Contig6067_frame_-1	DBLa0.11,1,196,1.1e-94
NS_L6_21_Contig11079_frame_-3	DBLa0.17,7,113,1.3e-35	CIDRa3.1,114,192,9.8e-26
NS_L8_55_Contig5859_frame_-3	DBLg5,1,123,1.9e-40	DBLd5,168,578,3.3e-160	CIDRb2,580,830,1.7e-102	DBLe4,884,1206,2.9e-134
S_L8_56_Contig2396_frame_3	NTSB,3,60,6.7e-15	DBLa0.24,76,184,1.2e-43
S_L3_13_Contig7216_frm3_orf1	NTSB,17,76,3.6e-16	DBLa0.22,89,323,1.1e-103
NS_L1_80_Contig36361_frame_-1	NTSB,18,77,7.3e-15	DBLa0.16,84,523,5.6e-207	CIDRa3.4,524,701,6.5e-75
NS_L1_80_Contig35916_frame_2	DBLa0.12,1,115,2.2e-41	CIDRa2.4,116,225,1.9e-43
NS_L8_51_Contig7782_frame_-3	NTSB,21,81,1.6e-17	DBLa0.7,82,334,1.8e-127
NS_L6_24_Contig7912_frame_1	DBLg14,1,308,9.7e-162	DBLz5,317,744,4.1e-223	DBLe4,750,775,0.00035
NS_L8_55_Contig2839_frame_1	DBLb10,45,186,2.3e-59
NS_L7_19_32249_frame_-3	DBLd1,1,161,3.7e-58	CIDRg5,162,434,1.2e-129
S_L7_20_32568_frame_2	CIDRpam,1,170,1.9e-107	DBLpam3,189,235,9.5e-27
NS_L1_80_Contig33156_frame_3	DBLa2,2,184,9.8e-77
NS_L1_95_37299_frame_-2	DBLd4,5,66,6.5e-16	CIDRg5,67,335,1e-131
NS_L8_55_26673_frame_2	NTSB,22,77,4.1e-15	DBLa0.16,80,532,8e-221
NS_L1_84_29434_frame_3	CIDRa2.2,1,85,1.2e-21	DBLd1,181,226,1.5e-09
NS_L8_65_Contig4857_frame_-1	NTSB,1,47,4.7e-12	DBLa0.15,52,168,3.1e-44
S_L7_20_Contig5896_frame_-1	DBLb5,35,180,8.7e-59
S_L8_56_Contig7404_frame_3	CIDRg12,1,155,4e-76
NS_L6_18_Contig7639_frame_1	DBLd4,2,100,5.3e-31	CIDRg9,101,179,1.3e-29
NS_L7_35_Contig2385_frame_1	DBLb7,3,387,4.2e-197
NS_L1_88_Contig17041_frame_2	DBLd1,6,246,3.1e-72	CIDRb1,247,396,2.2e-59
S_L8_56_Contig5477_frame_-3	CIDRg5,1,147,2.2e-54
NS_L1_80_99863_frame_-2	DBLd4,6,236,5.5e-84	CIDRd1,237,265,0.016
NS_L1_88_Contig17088_frm2_orf1	NTSB,10,65,3.2e-12	DBLa0.12,66,476,1.2e-197	CIDRa2.4,477,724,1.3e-114	DBLd1,831,1366,1e-177	CIDRg4,1367,1632,2.9e-126	DBLd1,1680,1727,7.4
NS_L7_27_Contig5966_frame_2	DBLd1,1,168,5.9e-62
NS_L7_19_Contig2129_frm-1_orf7	CIDRa2.4,6,149,9.9e-56	CIDRa3.1,188,206,12.0
NS_L1_80_92869_frame_-1	DBLg3,1,180,6.2e-86
NS_L6_20_Contig15856_frame_3	CIDRa2.10,4,141,1.5e-50	DBLb8,170,635,1.2e-181	DBLd1,718,844,2.4e-33
S_L7_42_28998_frame_-1	CIDRa3.2,1,259,1.4e-116	DBLd1,332,942,1.4e-162	CIDRb1,943,1200,1.2e-104
NS_L1_84_Contig10110_frame_-2	DBLa0.11,1,175,6.1e-83	CIDRa2.4,176,423,1.7e-110	DBLd1,517,1012,1.8e-172	CIDRg4,1013,1267,9.1e-117
S_L8_56_Contig6312_frame_-3	CIDRa1.6,1,88,4.9e-35	DBLb3,97,318,1.8e-82
NS_L7_32_Contig9612_frm2_orf0	CIDRa5,1,142,1.9e-64	DBLb5,167,648,7.9e-194	DBLg10,690,1061,1.2e-152
NS_L1_80_Contig11814_frame_3	DBLd4,2,268,7.1e-94	CIDRd1,269,409,2.6e-60
NS_L8_60_Contig7519_frame_1	DBLa0.5,7,184,3e-91
NS_L8_51_Contig3269_frame_-2	DBLg12,3,254,4.4e-91	DBLd1,262,732,3e-155	CIDRb7,734,977,1.1e-104	DBLe2,1014,1278,1.2e-126
NS_L1_95_Contig8044_frame_-1	DBLb1,1,206,2.2e-75	DBLb9,230,454,1.4e-80
S_L8_56_Contig2374_frame_3	CIDRb6,5,177,9.7e-78
NS_L6_20_Contig12929_frm1_orf3	DBLa0.1,97,178,3.1e-26
S_L3_13_Contig6081_frame_-2	DBLa0.14,3,351,1.5e-174	CIDRa4,352,604,7e-118	DBLd1,676,761,9.2e-18
S_L7_20_Contig5343_frame_2	NTSB,14,73,3.2e-14	DBLa0.1,79,335,1.5e-118
S_L3_13_Contig707_frame_2	NTSA,15,55,1.9e-09	DBLa0.18,62,471,1.8e-200	CIDRa4,472,738,4.9e-118	DBLb5,759,1155,1.2e-159
S_L7_20_33504_frame_-2	NTSB,48,110,1.1e-13	DBLa0.5,119,546,5.1e-190	CIDRa2.9,547,844,7.1e-104	DBLd1,925,1261,1.3e-116
NS_L1_95_Contig7953_frame_3	DBLd4,2,25,0.18	CIDRa2.4,26,230,6.5e-89
NS_L1_95_Contig2924_frame_-1	CIDRd1,1,150,3.9e-83
S_L3_13_Contig6055_frame_-2	DBLa0.4,1,190,2.8e-83	CIDRa6,191,423,7.5e-91
NS_L7_44_Contig5623_frame_-3	DBLz5,1,268,1.8e-134	DBLe4,274,380,2.8e-40
S_L8_56_Contig7067_frame_1	CIDRg10,2,122,1.7e-42
S_L3_13_Contig7217_frame_-3	DBLb5,1,294,2.1e-127	DBLg10,314,671,5.2e-140
NS_L7_19_Contig10042_frame_-3	DBLd1,3,240,1.6e-95
NS_L1_88_Contig16945_frame_-1	DBLd1,4,203,1.2e-74	CIDRb1,205,353,1.3e-57
NS_L6_21_Contig8416_frame_2	NTSB,34,92,8.9e-14	DBLa0.8,93,532,6.6e-202	CIDRa2.2,533,784,7.1e-111	DBLd1,870,1265,9.8e-115
S_L8_68_Contig5990_frame_2	CIDRa3.2,1,263,1.1e-103
S_L7_16_Contig4982_frame_-2	DBLd1,7,218,1.3e-78	CIDRb4,219,312,7.3e-34
NS_L8_59_Contig6391_frame_-2	NTSB,62,121,7.1e-15	DBLa0.17,125,415,1.2e-145
S_L7_42_28642_frm-3_orf3	NTSA,32,105,1.1e-30	DBLa1.3,106,306,1.6e-108
NS_L1_80_Contig32929_frame_2	DBLg4,1,253,9.8e-111
NS_L7_19_Contig10587_frame_2	DBLd1,1,166,1.1e-64	CIDRg7,167,432,3e-108
NS_L1_95_Contig8024_frame_-2	DBLd1,1,146,2.7e-50	CIDRb1,147,317,9.7e-72
S_L6_19_Contig7979_frame_1	DBLd1,1,168,1.6e-61	CIDRb1,169,285,2.1e-43
NS_L1_80_Contig35936_frame_2	DBLa0.5,1,113,1.4e-44	CIDRa2.8,114,232,3.7e-55
NS_L1_80_106069_frame_-2	DBLg8,1,152,1.8e-84	DBLz2,166,516,3.2e-186
NS_L8_51_Contig7459_frame_2	CIDRb5,3,230,1.5e-100
NS_L8_55_26793_frame_1	DBLg8,2,81,5.4e-34	DBLz1,105,525,2.2e-243	DBLe5,532,856,2.6e-196
NS_L7_29_Contig2726_frm3_orf3	NTSB,9,63,1.4e-10	DBLa0.18,64,149,2.5e-35
S_L8_68_Contig5982_frame_2	DBLa0.1,1,169,1.5e-66	CIDRa3.1,170,471,6e-129	CIDRa3.4,497,539,14.0	DBLd1,545,1026,3.2e-174	CIDRg7,1027,1287,1.5e-129
NS_L6_21_Contig8211_frame_3	NTSB,15,65,1e-12	DBLa0.15,81,514,3.8e-198	CIDRa3.2,515,665,8e-58
NS_L1_95_Contig9223_frame_3	NTSB,56,112,1.8e-10	DBLa0.4,113,521,4.1e-192	CIDRa5,522,664,3.7e-50
S_L3_13_Contig5955_frame_1	DBLg2,1,72,1.9e-25	DBLg4,85,211,5.8e-60
NS_L8_55_Contig3449_frm1_orf0	CIDRb1,2,42,6.1e-09	DBLg3,101,203,3.6e-39
S_L8_56_Contig7419_frame_-2	DBLd1,1,162,4e-59	CIDRb1,163,375,7.2e-89
NS_L6_24_Contig8773_frame_-3	DBLe6,1,247,1.2e-112
NS_L1_88_Contig17048_frame_-2	DBLa0.1,13,192,1.8e-50	CIDRa4,193,471,3.2e-92	CIDRa3.4,508,556,0.84	DBLd1,568,1052,6.7e-171	CIDRb1,1053,1296,3.6e-101
NS_L7_17_Contig3844_frame_-1	DBLb10,147,404,7.9e-101
S_L8_56_Contig2721_frm-3_orf5	NTSA,11,75,1.7e-19	DBLa1.7,82,478,9.1e-183	CIDRa1.4,479,730,2.5e-120	DBLb3,739,995,1.1e-107
NS_L1_88_Contig4250_frame_1	DBLb5,1,273,6.1e-112	DBLg3,286,655,6.8e-171
NS_L6_24_Contig8829_frame_1	DBLa0.9,1,375,3.9e-182	CIDRa2.4,376,627,2e-111	DBLd1,717,1204,4.8e-172	CIDRb1,1206,1448,3.8e-92
NS_L1_84_Contig4171_frame_2	DBLd1,18,504,5.2e-165
S_L6_19_50270_frame_-3	CIDRg6,2,191,2.5e-72	DBLz6,230,677,2.6e-203	DBLe6,682,1024,5e-150
S_L8_56_32715_frame_-2	DBLd1,23,226,7.1e-67
S_L7_20_Contig2765_frame_2	DBLd4,1,105,5.7e-30	CIDRg12,106,198,2.4e-35
S_L6_19_Contig8151_frame_3	CIDRa4,2,124,1.5e-51	DBLb5,144,489,8.2e-152
NS_L1_84_Contig3852_frame_-2	DBLd1,12,192,3.3e-52
S_L8_56_Contig6872_frame_2	DBLa0.18,2,254,4.1e-110	CIDRa5,255,364,2.3e-36
NS_L7_27_Contig7015_frame_1	CIDRg12,1,149,1.6e-71
NS_L1_80_98277_frame_-1	DBLd1,1,103,3e-33	CIDRg7,104,239,8.3e-62
S_L6_19_Contig7605_frame_2	DBLd1,1,270,1.1e-87	CIDRb5,271,407,3.4e-59
S_L7_16_Contig1654_frm1_orf10	NTSA,11,85,9.3e-24	DBLa1.2,87,484,1.5e-217	CIDRa1.1,485,736,1.8e-142	DBLb12,745,1203,4.2e-212	DBLg12,1221,1577,3.2e-147	DBLg4,1596,1970,7.5e-155
NS_L1_95_Contig8625_frame_2	DBLa0.15,1,189,2.3e-88	CIDRa3.2,190,492,1e-126	DBLd1,593,1095,1.3e-170	CIDRb1,1096,1347,3.4e-100
S_L7_20_32974_frame_-3	DBLd7,2,70,5.5e-14	CIDRb1,71,306,3.9e-99
S_L8_68_Contig6017_frame_2	DBLg18,2,174,2.4e-60	DBLe14,201,539,7.7e-131	DBLe3,574,875,1.5e-155
NS_L8_59_27688_frame_-2	NTSB,31,92,3.2e-10	DBLa0.6,93,523,7.9e-201	CIDRa3.1,524,842,1.9e-136	DBLd1,901,1462,3.7e-163	CIDRg2,1463,1724,1.3e-110
NS_L8_59_Contig3342_frame_1	CIDRg6,2,43,3.4e-11
S_L7_20_Contig6404_frm-3_orf4	DBLb8,119,270,1.2e-50
NS_L1_80_Contig5265_frame_2	NTSpam,33,83,2.2e-34	DBLpam1,84,462,8.9e-238	DBLe11,475,561,8.0	DBLpam2,563,1013,4.6e-264	CIDRpam,1022,1040,0.0004
NS_L1_84_Contig4086_frame_-2	CIDRb5,1,139,2.1e-63	CIDRa1.5,143,191,4.0
S_L7_20_Contig6591_frame_-2	DBLb8,1,242,1.3e-93	DBLd1,333,844,9.2e-167	CIDRg4,845,1115,1.5e-127
NS_L6_21_43523_frame_1	DBLa0.15,25,459,3e-198	CIDRa3.2,460,613,1.3e-60
S_L7_42_29006_frame_-1	DBLa1.2,1,184,2.1e-92	CIDRa1.5,185,437,3.1e-123	DBLb3,453,893,1.3e-183	DBLg2,908,1272,5.4e-138	DBLg4,1289,1351,3.1e-23
NS_L6_21_Contig12328_frame_3	DBLd1,3,72,1.2e-15	CIDRb1,73,213,5.5e-60
NS_L1_80_Contig33646_frame_2	CIDRa3.3,1,140,4.4e-74	CIDRa3.1,171,187,15.0	DBLd1,225,590,4.3e-121
S_L8_68_Contig3354_frame_1	DBLa0.16,3,82,1.4e-26	CIDRa5,83,331,2.2e-114	DBLb3,352,803,2.6e-173	DBLg3,812,1186,3.3e-174	DBLz4,1195,1614,5.4e-232
S_L8_56_Contig6389_frame_-3	CIDRg4,1,178,6.9e-81	CIDRb7,190,247,4.5
NS_L7_27_Contig2579_frame_3	DBLpam1,10,300,6.7e-192
S_L3_13_39322_frame_3	DBLa0.5,1,356,1.2e-185	CIDRa2.6,357,664,2.1e-132
NS_L7_44_Contig5688_frame_2	NTSB,8,74,2.1e-17	DBLa0.7,78,171,9.8e-42
NS_L8_59_Contig5612_frame_3	CIDRa3.1,1,169,3.1e-75	DBLd1,228,789,1.3e-163	CIDRg2,790,1051,6.3e-111
S_L8_68_Contig5851_frame_1	DBLa1.1,1,318,1.7e-159	CIDRa1.4,319,568,4e-141	DBLb1,577,1049,5.9e-209	DBLg11,1067,1437,1.2e-153
S_L7_20_Contig5601_frame_-2	NTSB,29,88,8.9e-12	DBLa0.1,92,537,1.9e-205	CIDRa3.1,538,841,1.7e-130	DBLd1,936,1397,3.6e-149
NS_L1_80_Contig22742_frame_2	DBLa0.9,1,175,9.8e-92
NS_L1_80_288128_frame_-2	DBLd1,101,190,6e-26
S_L8_56_33571_frame_2	DBLd1,2,297,6.8e-98	CIDRb1,298,556,7e-107	CIDRb2,842,890,16.0
S_L7_20_Contig6470_frame_-2	DBLd4,4,130,5.9e-48	CIDRg7,131,279,6e-76
[truncated: 4,469 more rows]

## Sheet: rask block
Transcript	Annotation 1	Annotation 2	Annotation 3	Annotation 4	Annotation 5	Annotation 6	Annotation 7	Annotation 8	Annotation 9	Annotation 10	Annotation 11	Annotation 12	Annotation 13	Annotation 14	Annotation 15	Annotation 16	Annotation 17	Annotation 18	Annotation 19	Annotation 20	Annotation 21	Annotation 22	Annotation 23	Annotation 24	Annotation 25	Annotation 26	Annotation 27	Annotation 28	Annotation 29	Annotation 30	Annotation 31	Annotation 32	Annotation 33	Annotation 34	Annotation 35	Annotation 36	Annotation 37	Annotation 38	Annotation 39	Annotation 40	Annotation 41	Annotation 42	Annotation 43	Annotation 44	Annotation 45	Annotation 46	Annotation 47	Annotation 48	Annotation 49
NS_L7_29_Contig7986_frame_-1	Rask_block_6,17,40,1.6e-11	Rask_block_149,43,59,3e-08	Rask_block_50,61,88,5.9e-07	Rask_block_22,91,113,7.8e-11	Rask_block_83,115,126,0.11	Rask_block_8,129,162,4.4e-16	Rask_block_1,171,196,2.1e-12	Rask_block_24,209,247,7.2e-14	Rask_block_10,257,283,4.2e-09	Rask_block_31,302,319,0.00012	Rask_block_33,363,379,0.0039	Rask_block_21,386,410,3.8e-09	Rask_block_41,412,429,0.0024
S_L8_68_Contig6018_frame_-2	Rask_block_10,34,61,1.4e-05	Rask_block_141,62,79,2.3e-07	Rask_block_65,104,138,4e-16	Rask_block_53,151,168,0.015	Rask_block_4,182,198,3.6e-07	Rask_block_189,199,212,3.5e-05	Rask_block_13,216,237,1.1e-07	Rask_block_234,239,257,1.4e-07	Rask_block_3,258,275,4.5e-09	Rask_block_457,276,287,3.4e-08	Rask_block_14,288,311,2e-06	Rask_block_5,322,340,1.8e-09	Rask_block_605,342,354,2.8e-08	Rask_block_183,355,368,2.4e-10	Rask_block_2,369,386,1e-09	Rask_block_59,387,407,6.1e-10	Rask_block_604,408,421,5.1e-10	Rask_block_1,422,447,6.2e-07	Rask_block_62,466,488,1.7e-05	Rask_block_61,508,533,1e-10	Rask_block_18,541,560,2.5e-07	Rask_block_15,584,607,1.2e-06	Rask_block_139,613,626,3.9e-05	Rask_block_4,628,644,3.8e-07	Rask_block_11,657,677,7e-10	Rask_block_16,683,697,0.0046	Rask_block_3,699,716,1.2e-07	Rask_block_86,717,737,4.4e-07	Rask_block_5,750,769,4.5e-09	Rask_block_94,785,801,3.1e-07	Rask_block_2,802,819,3.3e-09	Rask_block_364,820,841,1.1e-14	Rask_block_1,844,869,7.7e-09	Rask_block_352,873,982,4.4e-54	Rask_block_583,1007,1017,9.7e-07	Rask_block_11,1018,1038,1.8e-05	Rask_block_353,1045,1059,3.7e-07	Rask_block_3,1061,1077,4.6e-08	Rask_block_260,1079,1104,1.4e-14	Rask_block_5,1119,1138,8.9e-09	Rask_block_380,1147,1167,3.4e-12	Rask_block_2,1171,1185,2.6e-10	Rask_block_48,1186,1204,6.2e-05	Rask_block_1,1213,1238,1.9e-08	Rask_block_45,1251,1286,9.2e-08	Rask_block_18,1297,1315,1.9e-06	Rask_block_49,1320,1337,0.018	Rask_block_551,1342,1352,0.00032	Rask_block_33,1353,1373,0.0039
NS_L6_21_Contig3455_frame_1	Rask_block_415,1,23,5.4e-12	Rask_block_2,25,41,2.1e-09	Rask_block_48,42,61,2e-05	Rask_block_1,70,93,0.033	Rask_block_45,104,128,2.4e-07	Rask_block_463,153,199,5.9e-31	Rask_block_4,203,216,2.1e-05	Rask_block_11,231,245,0.064
NS_L7_44_Contig6987_frm1_orf5	Rask_block_264,11,30,5.6e-09	Rask_block_20,31,51,2.6e-05	Rask_block_17,57,94,2.5e-11	Rask_block_19,102,129,1.8e-10	Rask_block_4,139,154,1.6e-08	Rask_block_13,165,186,7.2e-10	Rask_block_513,187,193,0.028	Rask_block_3,194,211,4.9e-07	Rask_block_219,212,222,2.3e-05	Rask_block_14,223,246,6.8e-05	Rask_block_179,249,257,0.00031	Rask_block_5,258,277,5.1e-08	Rask_block_60,287,312,9e-10	Rask_block_2,313,330,4.5e-11	Rask_block_12,331,343,0.099	Rask_block_7,351,376,2.7e-09	Rask_block_1,378,403,4.5e-06	Rask_block_70,404,428,4e-06	Rask_block_9,429,455,2.7e-07	Rask_block_536,458,468,4.3e-05	Rask_block_6,471,495,9.6e-13	Rask_block_150,500,518,7.7e-08	Rask_block_23,520,543,7.6e-11	Rask_block_57,554,573,2.3e-08	Rask_block_8,584,617,8.5e-16	Rask_block_1,625,650,2.6e-09	Rask_block_121,655,694,1.3e-21	Rask_block_10,711,738,3.5e-07	Rask_block_141,739,756,2.8e-06	Rask_block_65,780,815,2e-16	Rask_block_53,828,845,0.018	Rask_block_4,860,875,6e-07	Rask_block_189,876,890,0.0015	Rask_block_13,893,914,1.4e-07	Rask_block_234,916,934,1.6e-07	Rask_block_3,935,952,5.5e-09	Rask_block_457,953,964,4.1e-08	Rask_block_14,965,988,1.3e-06	Rask_block_5,999,1017,4e-10	Rask_block_605,1019,1031,1.5e-05	Rask_block_183,1032,1045,2.9e-10	Rask_block_2,1046,1063,1.2e-09	Rask_block_48,1065,1081,7.7e-05	Rask_block_604,1083,1096,6.2e-10	Rask_block_1,1097,1122,1.2e-06	Rask_block_62,1141,1163,0.00019	Rask_block_61,1183,1208,1.4e-10	Rask_block_18,1216,1235,1.6e-06	Rask_block_15,1259,1282,9.2e-06
NS_L1_84_Contig9353_frame_-3	Rask_block_23,18,39,0.00079	Rask_block_116,64,76,3e-05	Rask_block_8,79,111,6.2e-14	Rask_block_1,120,145,5.5e-12	Rask_block_32,152,189,2.2e-09	Rask_block_10,202,227,0.023	Rask_block_26,257,271,5.1e-06	Rask_block_30,291,312,0.14	Rask_block_15,313,336,9.1e-09	Rask_block_35,339,354,8.7e-06	Rask_block_4,356,373,6.4e-07	Rask_block_73,390,404,0.15	Rask_block_11,411,431,4e-11	Rask_block_77,432,450,9.5e-06	Rask_block_16,456,471,0.00032	Rask_block_3,472,489,1e-07	Rask_block_573,490,498,0.00036	Rask_block_82,500,520,7.2e-05	Rask_block_5,534,553,4.4e-10	Rask_block_55,561,579,6.6e-06	Rask_block_29,595,611,0.0003	Rask_block_87,618,633,0.016	Rask_block_2,635,651,7.8e-08	Rask_block_12,652,671,5.1e-07	Rask_block_7,677,702,1.2e-09	Rask_block_1,704,729,8.3e-10	Rask_block_72,730,746,4.8e-07	Rask_block_9,752,776,1.8e-07	Rask_block_496,779,786,0.11	Rask_block_6,788,811,1.4e-08
S_L7_20_39453_frame_2	Rask_block_24,23,64,3.9e-15	Rask_block_10,71,96,7.4e-11	Rask_block_31,115,136,1.8e-07	Rask_block_56,139,157,3.8e-05	Rask_block_137,166,174,0.034	Rask_block_95,177,198,0.0017
NS_L8_54_Contig7929_frame_-2	Rask_block_11,49,69,2.8e-12	Rask_block_77,70,87,1e-05	Rask_block_16,94,110,6.5e-05	Rask_block_3,111,128,5.3e-08	Rask_block_27,146,166,0.0023	Rask_block_5,178,197,4.2e-05	Rask_block_55,198,216,0.0011	Rask_block_29,221,241,2.5e-05	Rask_block_2,258,274,1.6e-07	Rask_block_12,275,289,0.0064	Rask_block_7,293,317,2.1e-09	Rask_block_1,319,344,2.3e-10	Rask_block_9,360,382,0.00028	Rask_block_6,394,418,6.4e-10	Rask_block_243,425,437,1.5e-05	Rask_block_50,439,466,4.5e-12	Rask_block_22,469,491,4.8e-09	Rask_block_8,508,541,6.9e-16	Rask_block_1,546,569,1.4e-08	Rask_block_24,581,620,3.1e-12	Rask_block_10,631,655,0.00037	Rask_block_31,672,691,0.056	Rask_block_261,704,741,1e-20	Rask_block_4,742,759,0.0053	Rask_block_11,774,794,1.6e-06	Rask_block_3,818,833,0.00013	Rask_block_265,835,861,5e-05	Rask_block_5,873,892,2.1e-07	Rask_block_2,913,930,1.1e-09	Rask_block_48,931,951,1.7e-05	Rask_block_1,959,984,1.7e-08	Rask_block_45,993,1018,3.2e-08	Rask_block_463,1042,1088,8.1e-33	Rask_block_4,1092,1105,0.00012	Rask_block_11,1120,1139,0.00071	Rask_block_3,1145,1162,1.2e-07	Rask_block_27,1165,1187,0.00014	Rask_block_5,1194,1211,2.2e-10	Rask_block_213,1212,1228,5.6e-08	Rask_block_2,1230,1247,2.7e-08	Rask_block_1,1280,1305,0.0053	Rask_block_97,1316,1334,8.5e-06	Rask_block_206,1335,1375,5.8e-20	Rask_block_76,1387,1420,9.6e-07	Rask_block_4,1421,1433,0.0012	Rask_block_160,1447,1468,4.3e-07	Rask_block_3,1475,1491,0.0001	Rask_block_126,1493,1510,6.7e-07	Rask_block_5,1517,1536,2.2e-10
NS_L8_59_Contig5475_frm-1_orf3	Rask_block_20,22,44,1.1e-10	Rask_block_17,49,80,1.6e-08	Rask_block_19,87,116,2.6e-14	Rask_block_4,122,139,1.1e-08
NS_L1_88_Contig7416_frame_1	Rask_block_11,6,25,4.4e-08	Rask_block_16,27,42,0.00097	Rask_block_3,44,61,1e-07	Rask_block_82,64,84,3.4e-05	Rask_block_5,100,119,6.7e-10	Rask_block_94,132,153,1.4e-08	Rask_block_2,154,171,5.6e-11	Rask_block_99,173,204,6.6e-05	Rask_block_1,206,231,1.4e-10	Rask_block_45,241,281,4e-09	Rask_block_18,284,303,2.5e-05	Rask_block_28,305,316,0.2	Rask_block_49,327,345,0.22	Rask_block_30,391,409,0.2	Rask_block_15,427,448,1.7e-06	Rask_block_35,454,469,2.5e-06	Rask_block_4,493,509,0.00011	Rask_block_106,527,541,0.091	Rask_block_11,543,563,4.4e-09	Rask_block_77,564,582,3.8e-06	Rask_block_16,588,602,0.00029	Rask_block_3,604,619,3e-08	Rask_block_27,639,656,0.00017	Rask_block_5,670,689,2.6e-08	Rask_block_90,690,703,0.16	Rask_block_29,709,728,0.19	Rask_block_2,737,754,2e-10	Rask_block_12,755,773,7e-08	Rask_block_7,776,800,7.4e-11	Rask_block_1,803,828,1.8e-08	Rask_block_151,829,846,0.00094	Rask_block_9,853,873,1e-07	Rask_block_6,884,906,1.4e-05	Rask_block_50,927,954,6.9e-08	Rask_block_22,958,980,6.5e-11	Rask_block_8,996,1028,1.4e-16	Rask_block_1,1038,1063,8.2e-09	Rask_block_24,1075,1112,0.00014	Rask_block_10,1123,1150,3.2e-06	Rask_block_31,1159,1177,0.21	Rask_block_30,1193,1206,0.3	Rask_block_26,1230,1241,1.6e-08	Rask_block_341,1251,1272,1.6e-09	Rask_block_295,1275,1292,3e-07	Rask_block_21,1293,1310,2.9e-05
NS_L6_24_Contig7907_frame_-1	Rask_block_12,7,21,0.001	Rask_block_7,24,49,2e-11	Rask_block_1,51,75,1e-09	Rask_block_34,81,98,0.01	Rask_block_9,102,128,2.6e-07	Rask_block_348,129,149,9e-13	Rask_block_6,150,175,1.7e-14	Rask_block_68,176,195,3.8e-08	Rask_block_23,197,220,5.6e-08	Rask_block_104,221,233,3e-05	Rask_block_63,241,260,2.7e-11	Rask_block_114,263,278,0.2	Rask_block_67,280,291,6.5e-06	Rask_block_333,294,305,0.036	Rask_block_8,308,322,0.0014
NS_L8_59_Contig6384_frame_3	Rask_block_2,3,20,1.1e-12	Rask_block_12,21,39,2.7e-07	Rask_block_7,42,66,1.4e-11	Rask_block_1,69,94,4e-08	Rask_block_34,109,126,3.3e-05	Rask_block_9,130,157,8.5e-11	Rask_block_75,164,179,3.2e-08	Rask_block_6,187,211,2.1e-15	Rask_block_68,217,237,4.1e-08	Rask_block_23,239,261,8.3e-10	Rask_block_391,262,268,0.0052	Rask_block_63,275,295,1.6e-11	Rask_block_110,305,316,0.033	Rask_block_67,320,331,1.7e-05	Rask_block_77,332,342,0.12	Rask_block_8,348,367,2.1e-08
NS_L7_27_Contig4688_frm2_orf0	Rask_block_65,46,76,2.2e-11	Rask_block_53,93,113,0.045	Rask_block_4,124,141,1.1e-08	Rask_block_13,155,176,1.5e-09	Rask_block_3,185,202,5.9e-11	Rask_block_544,203,211,0.023	Rask_block_14,215,223,0.23
NS_L7_19_Contig9525_frame_1	Rask_block_9,1,22,4.2e-07	Rask_block_118,23,37,4.1e-05	Rask_block_6,42,62,7.7e-09	Rask_block_23,88,111,8e-09	Rask_block_57,119,134,1.6e-05	Rask_block_116,141,150,0.0013	Rask_block_8,156,188,2.1e-16	Rask_block_1,197,222,5.5e-09	Rask_block_32,234,265,1.9e-06
NS_L6_21_Contig8434_frame_-1	Rask_block_45,1,16,9.9e-05	Rask_block_78,22,43,1e-11	Rask_block_26,73,88,2.2e-07	Rask_block_127,98,126,0.00096	Rask_block_15,144,166,8.8e-10	Rask_block_35,168,183,2.4e-07	Rask_block_34,190,207,0.0024
S_L6_19_Contig12368_frame_3	Rask_block_107,1,13,7.4e-05	Rask_block_8,14,47,8.9e-18	Rask_block_1,56,81,2e-14	Rask_block_24,94,132,8.2e-13	Rask_block_10,141,167,2.4e-06	Rask_block_491,169,179,0.066	Rask_block_31,183,201,2.9e-07	Rask_block_56,203,221,0.011	Rask_block_33,239,253,0.0084
NS_L1_88_Contig11535_frame_-3	Rask_block_75,1,11,0.00016	Rask_block_6,21,44,9.6e-14	Rask_block_68,48,66,3.8e-09	Rask_block_23,70,92,1.8e-08	Rask_block_391,93,101,1.9e-05	Rask_block_63,102,121,5.1e-10	Rask_block_110,129,143,3.5e-07	Rask_block_67,145,156,1e-05	Rask_block_8,162,184,5.1e-11
NS_L6_21_Contig12521_frame_1	Rask_block_8,1,27,8.8e-12	Rask_block_1,36,61,2.2e-12	Rask_block_32,76,115,4.2e-13	Rask_block_10,132,159,8.4e-07	Rask_block_26,187,202,6.2e-08	Rask_block_15,244,266,8e-08	Rask_block_35,272,287,5.3e-05	Rask_block_4,306,323,1e-05	Rask_block_81,335,352,0.38	Rask_block_11,354,374,3.5e-10	Rask_block_109,375,385,0.066	Rask_block_16,398,413,1e-05	Rask_block_3,414,429,4.7e-08	Rask_block_27,463,483,4.3e-05	Rask_block_5,494,513,1.5e-11	Rask_block_301,515,529,0.0023	Rask_block_29,543,563,9.5e-05	Rask_block_2,579,596,4.1e-10	Rask_block_12,597,615,6.8e-06	Rask_block_7,617,641,2.4e-08	Rask_block_1,644,669,4.9e-08	Rask_block_72,671,686,7.2e-06	Rask_block_9,692,714,0.0033	Rask_block_6,729,752,7.1e-06	Rask_block_50,773,798,3.7e-09	Rask_block_22,802,824,4e-15	Rask_block_107,826,834,0.18	Rask_block_8,840,873,9.4e-16	Rask_block_1,878,901,3.4e-06	Rask_block_24,914,957,4.4e-15	Rask_block_10,966,992,2e-06	Rask_block_31,1010,1032,2e-05	Rask_block_205,1051,1063,6.6e-06	Rask_block_95,1071,1089,0.085	Rask_block_21,1095,1107,0.032
S_L7_20_Contig6181_frame_3	Rask_block_2,4,21,4.2e-12	Rask_block_12,22,40,2.7e-07	Rask_block_7,43,67,1.7e-06	Rask_block_1,70,95,2e-12	Rask_block_34,102,120,0.0014	Rask_block_9,124,150,2.7e-06	Rask_block_118,151,165,1.2e-05	Rask_block_6,169,193,8.4e-16	Rask_block_438,194,212,2.5e-09	Rask_block_23,215,238,1.8e-06	Rask_block_57,249,268,1.1e-06	Rask_block_8,279,311,2.3e-11	Rask_block_1,319,344,4.3e-12	Rask_block_32,356,392,2.1e-08	Rask_block_10,409,434,2.3e-05	Rask_block_15,537,559,5.2e-05	Rask_block_35,565,580,2.2e-06	Rask_block_132,585,607,4.1e-07	Rask_block_4,609,626,1.1e-05	Rask_block_11,664,684,1.8e-11	Rask_block_77,686,702,0.01	Rask_block_16,708,723,0.00073	Rask_block_3,724,741,1.7e-09	Rask_block_82,746,764,5.5e-05	Rask_block_433,768,778,0.14	Rask_block_5,779,798,3.4e-10	Rask_block_55,804,822,0.00012	Rask_block_29,845,865,3.7e-05	Rask_block_87,881,892,0.017	Rask_block_2,894,910,1.3e-07	Rask_block_12,912,929,0.00011	Rask_block_7,933,957,3e-10	Rask_block_1,960,985,8.3e-10	Rask_block_9,1003,1025,0.00064	Rask_block_178,1031,1045,0.0052	Rask_block_6,1048,1067,4.6e-09	Rask_block_148,1083,1108,3.1e-11	Rask_block_22,1111,1130,6.4e-10	Rask_block_522,1134,1154,8.7e-09	Rask_block_8,1157,1188,4.4e-10	Rask_block_1,1196,1209,0.0038
S_L8_56_Contig2308_frame_2	Rask_block_168,2,11,0.029	Rask_block_10,23,50,8.3e-10	Rask_block_26,84,97,0.00027	Rask_block_30,111,137,3.4e-05	Rask_block_15,138,159,2.2e-06	Rask_block_35,163,178,6.4e-06	Rask_block_34,183,201,0.035	Rask_block_4,205,222,9.4e-06	Rask_block_73,239,250,0.31	Rask_block_11,255,275,5.7e-10	Rask_block_77,276,288,0.00012	Rask_block_16,299,315,0.00037	Rask_block_3,316,333,2.3e-09	Rask_block_253,335,343,0.00039	Rask_block_27,359,374,0.11	Rask_block_5,389,408,1.4e-07	Rask_block_55,413,430,0.00015	Rask_block_29,437,453,0.00055	Rask_block_105,474,484,0.0075	Rask_block_2,487,501,2e-07	Rask_block_12,503,520,4.2e-05	Rask_block_7,525,549,2.5e-10	Rask_block_1,552,577,9.1e-09	Rask_block_122,578,589,0.019	Rask_block_9,592,613,8.4e-08	Rask_block_178,615,633,8.5e-08	Rask_block_6,635,657,5.4e-12	Rask_block_103,663,678,0.00023	Rask_block_85,682,700,1.7e-11	Rask_block_22,707,726,1e-08	Rask_block_83,732,744,0.001	Rask_block_8,746,781,2.5e-10	Rask_block_1,791,814,7.2e-10	Rask_block_24,827,867,7.6e-07	Rask_block_10,876,897,7e-07	Rask_block_31,917,938,3.8e-05	Rask_block_56,942,961,0.00019	Rask_block_28,978,988,0.036	Rask_block_21,1012,1028,0.00042
NS_L1_95_Contig3127_frame_3	Rask_block_323,17,25,0.007	Rask_block_20,30,52,3.2e-09	Rask_block_17,56,85,7.4e-06	Rask_block_19,93,125,1.7e-18	Rask_block_4,132,149,6.1e-07	Rask_block_13,156,177,9.4e-12	Rask_block_3,192,208,2.3e-07
NS_L6_18_Contig14788_frame_1	Rask_block_27,3,19,0.0019	Rask_block_5,33,52,9.3e-12	Rask_block_55,61,80,0.00013	Rask_block_29,101,117,1.1e-05	Rask_block_198,129,137,0.00043	Rask_block_2,139,155,2.9e-08	Rask_block_12,156,174,9.1e-06	Rask_block_7,177,202,1.5e-13	Rask_block_1,204,229,2.5e-10	Rask_block_122,230,246,1.4e-05	Rask_block_9,248,270,0.00038	Rask_block_454,272,284,0.00081	Rask_block_6,286,310,4e-10	Rask_block_103,323,337,1.4e-05	Rask_block_85,340,359,4e-09	Rask_block_22,365,384,2.4e-08	Rask_block_83,390,402,4.8e-05	Rask_block_8,405,439,7.9e-12
NS_L6_20_Contig16273_frame_-2	Rask_block_1,2,23,3.3e-08	Rask_block_34,34,52,1.2e-06	Rask_block_9,56,83,3.2e-09	Rask_block_75,87,103,2.9e-07	Rask_block_6,108,131,3.5e-12	Rask_block_23,153,176,3.1e-09	Rask_block_154,182,196,8.1e-06	Rask_block_57,224,238,1.4e-05	Rask_block_263,242,250,0.005	Rask_block_8,259,291,2.7e-15	Rask_block_1,301,327,5.9e-14	Rask_block_334,329,340,0.0053	Rask_block_32,342,379,4.1e-14	Rask_block_125,389,404,7.7e-07	Rask_block_10,405,431,2.5e-07	Rask_block_26,457,473,4.4e-06	Rask_block_15,524,545,5.3e-06	Rask_block_35,547,562,7.9e-05	Rask_block_4,570,587,5.6e-06	Rask_block_81,593,607,0.0019	Rask_block_11,610,630,5.3e-11	Rask_block_77,631,646,0.15	Rask_block_16,696,711,0.00043	Rask_block_3,712,728,3e-08	Rask_block_156,732,744,0.00022	Rask_block_27,748,768,0.0018	Rask_block_5,780,799,5.8e-11	Rask_block_55,805,822,0.0049	Rask_block_448,824,832,0.21	Rask_block_29,833,853,5.7e-06	Rask_block_105,878,888,0.0001	Rask_block_2,889,905,3e-07
NS_L8_65_Contig5571_frm-1_orf5	Rask_block_20,23,44,1.9e-10	Rask_block_17,47,74,5.4e-06	Rask_block_19,82,116,1.8e-16	Rask_block_4,122,139,7.1e-07	Rask_block_13,148,168,1.6e-09	Rask_block_233,171,183,6.5e-07	Rask_block_3,185,201,4.3e-07	Rask_block_54,202,213,0.22	Rask_block_14,224,245,0.00013	Rask_block_345,251,261,6.1e-06	Rask_block_5,262,279,2.9e-10	Rask_block_36,285,316,5.6e-12	Rask_block_153,325,331,0.0023	Rask_block_2,332,345,3.3e-08
NS_L8_54_Contig8338_frame_-1	Rask_block_16,2,10,0.11	Rask_block_3,12,28,9.1e-10	Rask_block_98,30,48,1.4e-09	Rask_block_5,59,78,7e-09	Rask_block_90,79,93,0.0024	Rask_block_94,101,122,9.2e-08	Rask_block_2,123,139,9.2e-10	Rask_block_136,141,164,3.2e-12
S_L7_20_Contig6330_frame_1	Rask_block_14,8,30,3.2e-05	Rask_block_5,38,56,1e-11	Rask_block_183,70,82,1.9e-10	Rask_block_2,83,100,1.1e-11	Rask_block_59,101,120,5.3e-10	Rask_block_1,135,160,1.2e-09	Rask_block_119,161,173,9.2e-05
NS_L7_17_Contig5348_frame_-2	Rask_block_65,24,57,4.3e-09	Rask_block_53,70,89,1e-07	Rask_block_4,99,116,1.2e-08	Rask_block_444,117,128,2.4e-05	Rask_block_13,129,150,8.8e-09	Rask_block_266,153,164,0.033	Rask_block_3,168,185,2.1e-10	Rask_block_174,186,195,8.9e-05	Rask_block_14,199,220,0.0012	Rask_block_5,232,249,1.5e-10	Rask_block_589,259,270,0.0032	Rask_block_2,271,288,7e-11	Rask_block_59,289,309,2.4e-08	Rask_block_1,316,341,2.7e-09	Rask_block_62,359,381,4.9e-07	Rask_block_61,386,411,7.8e-15	Rask_block_18,427,442,4.1e-06	Rask_block_28,455,466,0.00033	Rask_block_26,490,505,0.15	Rask_block_26,532,540,2.4e-06	Rask_block_26,542,556,0.005
S_L8_68_Contig6808_frame_3	Rask_block_50,2,28,5.5e-09	Rask_block_22,31,53,2.3e-09	Rask_block_417,55,63,0.00032	Rask_block_8,68,101,5.4e-17	Rask_block_445,102,109,0.00023	Rask_block_1,110,135,1.1e-12	Rask_block_24,147,188,1e-13	Rask_block_10,200,223,5.4e-09	Rask_block_31,237,258,2.6e-06	Rask_block_127,260,289,5.3e-08	Rask_block_21,328,350,3.9e-11	Rask_block_41,352,370,7.1e-05
NS_L1_80_Contig33401_frame_-3	Rask_block_8,1,33,1.1e-16	Rask_block_1,38,61,4.1e-11	Rask_block_24,74,112,9.6e-13	Rask_block_10,119,145,1.2e-12	Rask_block_459,148,159,8.1e-06	Rask_block_56,186,202,3.3e-05	Rask_block_28,239,250,0.0031
NS_L8_59_Contig5568_frame_3	Rask_block_251,24,36,0.002	Rask_block_23,41,64,4.2e-09	Rask_block_57,71,91,7.6e-07	Rask_block_223,93,102,0.019	Rask_block_8,105,138,3.5e-16	Rask_block_226,139,147,0.087	Rask_block_1,149,174,1.3e-11	Rask_block_32,190,227,4.9e-16	Rask_block_10,242,269,3.7e-07	Rask_block_49,274,287,0.16	Rask_block_26,293,307,0.0015
S_L6_19_50212_frame_2	Rask_block_4,14,28,1.1e-05	Rask_block_11,38,58,4.8e-12	Rask_block_16,87,102,3.8e-05	Rask_block_3,103,118,1.8e-07	Rask_block_156,123,135,6.6e-05	Rask_block_27,139,158,0.088	Rask_block_5,176,194,1.8e-10	Rask_block_55,200,218,2.2e-05	Rask_block_29,221,242,0.0045	Rask_block_198,246,254,0.00076	Rask_block_2,255,272,1.1e-06	Rask_block_12,273,292,0.00072	Rask_block_7,296,321,1.6e-05	Rask_block_1,323,348,1.8e-11	Rask_block_72,349,364,1.2e-05	Rask_block_9,370,392,0.021	Rask_block_6,407,432,7.6e-12	Rask_block_173,433,447,0.00036	Rask_block_50,454,481,1.7e-12	Rask_block_22,485,507,2e-14	Rask_block_247,508,520,3.4e-08	Rask_block_8,525,557,3.6e-14	Rask_block_1,562,585,1.5e-09	Rask_block_24,597,638,1.5e-12	Rask_block_10,646,672,1.6e-05	Rask_block_31,686,706,2.5e-05	Rask_block_56,709,723,0.13	Rask_block_137,733,745,1.1e-06	Rask_block_30,748,768,0.22	Rask_block_21,777,790,0.0076
NS_L7_32_Contig13829_frame_-3	Rask_block_15,9,33,4.7e-07	Rask_block_74,39,53,3.5e-06	Rask_block_4,56,73,6e-08	Rask_block_11,82,102,1e-13	Rask_block_77,103,120,1.2e-06	Rask_block_16,126,142,3.3e-06	Rask_block_3,143,159,1e-09	Rask_block_98,161,179,2.3e-06
NS_L8_59_27328_frame_-3	Rask_block_20,68,89,4.4e-11	Rask_block_17,92,123,1.7e-06	Rask_block_19,130,163,1.4e-14	Rask_block_4,170,186,1.3e-05	Rask_block_13,198,219,6.4e-12	Rask_block_215,220,232,0.0022	Rask_block_3,234,250,1.5e-06	Rask_block_79,251,266,3.7e-09	Rask_block_14,267,289,6.5e-05	Rask_block_64,294,307,0.00013	Rask_block_5,309,328,4.3e-10	Rask_block_36,330,357,7.2e-15	Rask_block_2,362,379,1.2e-12	Rask_block_12,380,397,0.001
NS_L6_18_Contig14800_frm-2_orf5	Rask_block_264,11,30,4.8e-12	Rask_block_20,32,53,0.00024	Rask_block_17,56,95,4.8e-12	Rask_block_19,103,130,3.1e-10	Rask_block_4,140,155,2.7e-08	Rask_block_13,166,187,1.2e-09	Rask_block_513,188,194,0.049	Rask_block_3,195,212,8.3e-07	Rask_block_219,213,223,4e-05	Rask_block_14,224,247,0.00034	Rask_block_5,259,278,3.5e-08	Rask_block_60,288,313,1.2e-08	Rask_block_2,314,331,7.7e-11	Rask_block_12,332,348,0.00032	Rask_block_7,352,377,1.6e-10	Rask_block_1,379,404,7.7e-06	Rask_block_70,405,429,6.8e-06	Rask_block_9,430,456,1.6e-07	Rask_block_536,459,469,0.0077	Rask_block_6,472,495,1.3e-13	Rask_block_150,501,519,8.5e-07	Rask_block_23,521,544,2.6e-09	Rask_block_57,555,574,3.9e-08	Rask_block_8,585,618,1.5e-15	Rask_block_1,626,651,4.4e-09	Rask_block_121,656,695,2.2e-21	Rask_block_10,712,739,5.9e-07	Rask_block_141,740,757,4.7e-06	Rask_block_65,781,816,4.3e-15	Rask_block_4,861,876,7.4e-07	Rask_block_189,877,890,0.017	Rask_block_13,894,915,2.3e-07	Rask_block_234,917,935,1.1e-07	Rask_block_3,936,953,9.3e-09	Rask_block_457,954,965,7.1e-08	Rask_block_14,966,989,2.6e-06	Rask_block_5,1000,1018,6.8e-10	Rask_block_605,1020,1032,2.2e-07	Rask_block_183,1033,1046,4.9e-10	Rask_block_2,1047,1064,2.1e-09	Rask_block_59,1065,1085,1.3e-09	Rask_block_604,1086,1099,5e-07	Rask_block_1,1100,1125,2e-06	Rask_block_62,1144,1166,0.00053	Rask_block_61,1187,1211,2e-09	Rask_block_18,1219,1238,3.7e-07	Rask_block_15,1262,1284,0.00017	Rask_block_139,1291,1304,3.6e-05	Rask_block_4,1306,1322,7.9e-07
NS_L8_59_Contig5572_frame_3	Rask_block_2,1,12,0.00019	Rask_block_12,13,32,2.8e-05	Rask_block_7,39,63,7.8e-08	Rask_block_1,65,90,2.7e-09	Rask_block_72,98,114,3.5e-05	Rask_block_9,115,136,6.6e-07	Rask_block_443,143,151,0.078	Rask_block_6,152,175,2.3e-11	Rask_block_180,178,192,1.6e-06	Rask_block_50,196,223,3.4e-09	Rask_block_22,228,250,1.6e-12	Rask_block_107,252,266,1.4e-07	Rask_block_8,273,304,2.9e-17	Rask_block_1,311,332,2.4e-08	Rask_block_516,333,343,1.4e-06
S_L7_20_33508_frame_-3	Rask_block_65,9,44,1.1e-16	Rask_block_53,53,73,1.1e-07	Rask_block_4,82,99,2.2e-07	Rask_block_13,117,138,2.2e-08	Rask_block_3,147,164,1.6e-08	Rask_block_174,165,174,0.00017	Rask_block_14,177,200,6.6e-07	Rask_block_5,211,229,1.9e-11	Rask_block_183,243,256,8.9e-11	Rask_block_2,257,274,1.1e-10	Rask_block_59,275,295,5.2e-08	Rask_block_1,306,331,6.4e-07	Rask_block_62,350,373,2.7e-05	Rask_block_61,413,439,4.3e-13	Rask_block_18,447,465,3.8e-09	Rask_block_101,474,490,8.2e-05	Rask_block_65,518,549,5.2e-15	Rask_block_53,557,574,0.00042	Rask_block_4,583,600,1.2e-05	Rask_block_13,618,639,2.4e-09	Rask_block_3,648,665,3.4e-06	Rask_block_272,666,675,0.00022	Rask_block_14,677,700,4.8e-07	Rask_block_5,713,731,8.4e-10	Rask_block_183,745,757,4.6e-10	Rask_block_2,758,775,1.1e-10	Rask_block_59,776,796,2.1e-08	Rask_block_1,808,833,5.2e-11	Rask_block_62,848,869,7.7e-05	Rask_block_61,873,898,1.5e-14	Rask_block_18,905,924,5.4e-09	Rask_block_612,927,939,2e-05	Rask_block_15,944,970,1.5e-07	Rask_block_74,974,987,0.00014	Rask_block_4,990,1007,1.4e-07	Rask_block_11,1016,1036,2.9e-11	Rask_block_16,1044,1056,0.002	Rask_block_3,1057,1074,3.1e-09	Rask_block_86,1075,1097,2.1e-05	Rask_block_5,1109,1128,2.7e-09	Rask_block_90,1129,1143,0.00099	Rask_block_2,1170,1187,1.1e-11	Rask_block_48,1188,1208,5.3e-06	Rask_block_1,1216,1241,1.8e-10	Rask_block_45,1253,1283,3.1e-05
NS_L6_24_Contig7649_frame_-2	Rask_block_75,1,12,0.0014	Rask_block_6,18,35,1.4e-11	Rask_block_143,44,59,0.00025	Rask_block_23,63,86,0.033	Rask_block_57,105,125,1.3e-05	Rask_block_223,127,135,0.0036	Rask_block_8,140,172,2.8e-14	Rask_block_1,179,204,5.6e-10	Rask_block_32,220,258,7.2e-08	Rask_block_10,277,302,1.6e-05	Rask_block_26,330,343,0.00056	Rask_block_15,377,399,5.1e-07	Rask_block_35,401,416,4e-06	Rask_block_34,450,464,0.11	Rask_block_4,474,491,1.3e-05	Rask_block_106,493,506,0.017	Rask_block_11,512,532,2.1e-10	Rask_block_158,533,550,5.5e-09	Rask_block_16,561,577,3e-06	Rask_block_3,578,595,2.3e-09	Rask_block_253,597,605,0.0029	Rask_block_27,617,633,0.11	Rask_block_398,645,652,0.036	Rask_block_5,656,675,3.9e-09	Rask_block_29,702,722,2e-08	Rask_block_2,742,759,7.9e-08	Rask_block_12,760,776,0.029	Rask_block_7,778,800,0.00051	Rask_block_1,804,829,2.4e-09	Rask_block_72,830,846,0.00011	Rask_block_9,847,869,1.2e-06	Rask_block_6,881,906,7.6e-10	Rask_block_50,924,949,3.1e-08	Rask_block_22,952,974,6e-13	Rask_block_159,975,986,7.4e-06	Rask_block_8,997,1029,2.2e-16	Rask_block_1,1034,1057,2.7e-08	Rask_block_24,1069,1109,4.6e-13	Rask_block_10,1115,1141,2.3e-08	Rask_block_31,1157,1174,5.7e-06	Rask_block_127,1177,1198,0.00011	Rask_block_137,1222,1234,4e-06	Rask_block_120,1236,1243,0.31	Rask_block_21,1244,1269,1.2e-11
NS_L1_95_Contig9131_frame_3	Rask_block_22,3,25,4.3e-13	Rask_block_159,26,39,8.8e-08	Rask_block_8,42,74,1.1e-15	Rask_block_1,83,109,7.1e-10	Rask_block_24,124,162,1.6e-11	Rask_block_10,171,194,7.8e-12	Rask_block_31,211,228,2.7e-05
S_L3_13_Contig7167_frame_1	Rask_block_20,33,54,3e-08	Rask_block_17,59,90,0.00014	Rask_block_19,94,128,7.4e-13	Rask_block_4,138,154,1.3e-05	Rask_block_13,164,185,3.9e-08	Rask_block_3,197,214,7.5e-07	Rask_block_79,215,230,8.8e-09	Rask_block_14,231,253,3.1e-06	Rask_block_210,258,270,0.066	Rask_block_5,271,289,5.2e-10	Rask_block_36,293,321,8.2e-13	Rask_block_88,327,333,0.0019	Rask_block_2,334,343,0.0015
S_L8_68_Contig5815_frame_-1	Rask_block_16,29,44,8.1e-06	Rask_block_3,45,62,9.3e-10	Rask_block_27,65,85,0.00065	Rask_block_5,98,117,1.9e-11	Rask_block_90,118,131,8.5e-05	Rask_block_96,139,155,0.00038	Rask_block_2,164,181,2.6e-12	Rask_block_166,183,195,0.00046
S_L7_42_Contig5437_frame_-2	Rask_block_439,41,49,0.29	Rask_block_20,53,75,2.2e-07	Rask_block_17,78,109,1.4e-12	Rask_block_19,112,145,6.4e-13	Rask_block_4,152,169,9e-07	Rask_block_13,178,199,9.2e-11	Rask_block_616,202,210,0.013	Rask_block_3,211,228,3.4e-08	Rask_block_204,229,239,8e-07	Rask_block_14,242,262,0.00013	Rask_block_5,269,287,4.6e-09	Rask_block_2,323,340,1.2e-12	Rask_block_12,341,360,1.5e-05	Rask_block_7,364,389,1.4e-10	Rask_block_1,391,412,7e-07
NS_L1_73_Contig35666_frame_2	Rask_block_20,65,87,6.2e-06	Rask_block_17,90,122,7.1e-10	Rask_block_19,124,157,3.5e-15	Rask_block_4,164,180,6.3e-05	Rask_block_13,189,210,2.7e-11	Rask_block_3,221,238,9.6e-07	Rask_block_204,239,249,7.5e-06	Rask_block_5,279,298,8.2e-09	Rask_block_36,301,328,2.1e-08	Rask_block_2,333,349,3.6e-11	Rask_block_12,351,370,6.8e-05	Rask_block_7,373,397,6e-06	Rask_block_1,400,425,1e-07	Rask_block_70,426,452,2e-06	Rask_block_9,453,478,1e-09	Rask_block_6,494,515,9.1e-12	Rask_block_23,545,567,1.9e-06	Rask_block_57,579,597,3.8e-08	Rask_block_8,607,637,1.2e-12	Rask_block_1,649,674,1.2e-12	Rask_block_32,684,719,1.3e-08	Rask_block_10,734,759,5.4e-06	Rask_block_101,769,793,1.2e-09	Rask_block_52,799,815,0.003	Rask_block_65,820,854,6.2e-11	Rask_block_53,862,881,0.11	Rask_block_4,891,908,1.1e-06	Rask_block_13,925,946,4.1e-05	Rask_block_3,959,975,2.3e-09	Rask_block_174,976,986,0.0067	Rask_block_14,988,1010,0.17	Rask_block_5,1024,1042,1.2e-10	Rask_block_187,1045,1057,0.00023	Rask_block_2,1058,1075,2.9e-10	Rask_block_59,1076,1096,4.8e-08	Rask_block_1,1108,1133,3.3e-08	Rask_block_119,1134,1146,0.06	Rask_block_62,1150,1171,3.1e-06	Rask_block_61,1186,1211,6.3e-14	Rask_block_18,1227,1245,1.5e-05	Rask_block_15,1260,1282,1.1e-05	Rask_block_74,1288,1301,0.0001	Rask_block_4,1304,1321,1e-06	Rask_block_11,1330,1350,7.8e-07	Rask_block_16,1353,1368,0.00041	Rask_block_3,1369,1385,6.1e-08	Rask_block_86,1387,1407,0.00016	Rask_block_5,1417,1436,7.2e-09	Rask_block_167,1455,1469,0.0017
S_L7_16_27226_frame_2	Rask_block_8,1,27,7.5e-12	Rask_block_1,35,60,1.4e-11	Rask_block_32,73,109,3.6e-10	Rask_block_10,123,147,5.5e-07	Rask_block_26,177,186,0.009	Rask_block_15,218,237,0.0047	Rask_block_35,243,252,0.0019	Rask_block_4,280,296,4.1e-05	Rask_block_81,302,321,0.0036	Rask_block_11,327,347,2.6e-10	Rask_block_237,348,359,0.0025	Rask_block_16,375,390,0.0065	Rask_block_3,391,408,2.7e-09	Rask_block_452,434,449,0.00015	Rask_block_5,466,485,9.7e-10	Rask_block_29,513,531,0.11	Rask_block_498,538,547,6.8e-05	Rask_block_2,548,565,2.9e-08	Rask_block_12,566,585,3.4e-06	Rask_block_7,587,612,2.1e-08	Rask_block_1,614,639,2.3e-11	Rask_block_151,640,656,7.9e-07	Rask_block_9,659,684,0.00013	Rask_block_6,695,720,2.1e-12	Rask_block_477,722,744,1.9e-07	Rask_block_22,770,792,4.4e-08	Rask_block_176,795,807,0.0068	Rask_block_8,809,841,4.5e-13	Rask_block_1,852,877,4.3e-13	Rask_block_24,889,927,8.4e-08	Rask_block_10,940,965,7.2e-06	Rask_block_31,988,1007,0.0028	Rask_block_261,1020,1056,1.2e-17	Rask_block_4,1057,1074,0.014	Rask_block_11,1087,1107,2.3e-06	Rask_block_383,1109,1125,1.1e-09	Rask_block_3,1129,1145,5.8e-05	Rask_block_265,1147,1179,2.8e-13	Rask_block_5,1187,1204,1e-05	Rask_block_415,1205,1228,1.3e-13	Rask_block_2,1230,1246,7.5e-08	Rask_block_48,1247,1266,0.00015	Rask_block_1,1275,1300,0.00065	Rask_block_45,1310,1332,2.8e-06	Rask_block_363,1338,1356,4.6e-09	Rask_block_463,1360,1405,2.8e-23	Rask_block_4,1409,1424,6.4e-05	Rask_block_11,1436,1455,0.034	Rask_block_3,1461,1478,1.1e-07
S_L8_68_Contig3237_frame_3	Rask_block_8,1,20,2.5e-05	Rask_block_1,28,53,7.2e-13	Rask_block_32,65,98,2.9e-08	Rask_block_10,112,138,7.3e-07	Rask_block_26,175,186,0.004	Rask_block_30,205,215,0.098	Rask_block_15,226,248,0.0002	Rask_block_35,253,268,1.5e-06	Rask_block_4,297,313,1e-05	Rask_block_81,359,375,0.0026	Rask_block_11,378,398,1e-10	Rask_block_109,399,410,0.00044	Rask_block_16,421,437,0.00064	Rask_block_3,439,456,1.1e-09	Rask_block_253,458,466,0.00047	Rask_block_27,470,487,0.0018	Rask_block_5,503,523,1.4e-08	Rask_block_249,524,535,6.3e-05	Rask_block_96,561,577,0.0017	Rask_block_2,584,601,7.2e-10	Rask_block_12,602,618,0.0083	Rask_block_7,625,651,3.9e-11
S_L7_42_Contig6031_frame_-2	Rask_block_19,2,23,1.4e-09	Rask_block_4,33,50,8.5e-08	Rask_block_13,59,80,6.9e-11	Rask_block_3,92,109,1.6e-06	Rask_block_79,110,124,2.4e-08	Rask_block_14,126,147,8.7e-05	Rask_block_210,155,167,0.0029	Rask_block_5,168,187,3.6e-10	Rask_block_60,197,221,1.8e-09	Rask_block_2,222,239,1.2e-11	Rask_block_12,241,258,0.00014	Rask_block_7,260,284,2.5e-09	Rask_block_1,287,312,2e-09	Rask_block_70,314,337,1.4e-07	Rask_block_9,338,364,6.3e-10	Rask_block_399,367,375,0.0082	Rask_block_6,381,403,2.2e-14	Rask_block_150,408,425,1e-06	Rask_block_23,427,450,6.6e-11	Rask_block_57,462,481,8e-10	Rask_block_8,491,524,2.5e-15	Rask_block_1,533,556,7.7e-12	Rask_block_121,564,601,1.9e-20	Rask_block_10,618,643,1.3e-07	Rask_block_52,668,685,0.0011	Rask_block_65,691,721,4.2e-14
NS_L6_21_Contig11164_frame_1	Rask_block_50,1,22,4.3e-07	Rask_block_22,24,46,6.6e-12	Rask_block_107,48,62,7.3e-05	Rask_block_8,66,99,2.1e-18	Rask_block_1,108,133,2.5e-14	Rask_block_24,144,185,1.2e-14	Rask_block_10,194,221,1.1e-07	Rask_block_207,224,230,0.014	Rask_block_31,233,251,6.2e-08	Rask_block_205,274,282,0.0029
NS_L6_24_Contig8692_frame_-3	Rask_block_4,1,15,1.1e-05	Rask_block_13,24,43,8.2e-10	Rask_block_215,46,58,2.8e-06	Rask_block_3,60,76,7e-07	Rask_block_54,77,91,1e-05	Rask_block_14,96,114,3.1e-06	Rask_block_161,128,137,9.5e-06	Rask_block_5,138,156,1e-09	Rask_block_36,160,185,2.9e-11	Rask_block_88,191,197,0.0011	Rask_block_2,198,215,2.2e-13
S_L6_19_Contig12439_frame_-2	Rask_block_2,1,16,2.3e-11	Rask_block_12,18,33,0.057	Rask_block_7,41,65,8.9e-09	Rask_block_1,68,93,2.8e-09	Rask_block_70,94,120,6.8e-06	Rask_block_9,121,146,8.1e-11	Rask_block_6,162,186,1.3e-14	Rask_block_23,212,235,1.1e-11	Rask_block_57,247,264,5.1e-05	Rask_block_8,274,304,1.3e-13	Rask_block_1,316,341,2.9e-13	Rask_block_32,352,386,1.3e-08	Rask_block_10,401,426,1.1e-06	Rask_block_101,436,457,3.2e-08	Rask_block_52,465,480,0.0043	Rask_block_65,486,519,5.7e-17	Rask_block_53,529,549,7.5e-08	Rask_block_4,559,576,4.9e-08	Rask_block_189,577,590,0.0019	Rask_block_13,594,615,5.8e-09	Rask_block_3,631,647,8e-08	Rask_block_146,648,659,2.8e-05	Rask_block_14,660,683,7.4e-07	Rask_block_5,693,712,6.1e-11	Rask_block_400,726,739,8.1e-08	Rask_block_2,741,758,6.3e-11
NS_L1_88_Contig15770_frame_-2	Rask_block_20,28,49,6.1e-06	Rask_block_17,53,84,1.6e-05	Rask_block_19,87,120,1.5e-13	Rask_block_4,127,144,3.7e-07	Rask_block_13,153,174,8.6e-09	Rask_block_416,175,185,1.7e-06	Rask_block_3,186,203,8.3e-07	Rask_block_204,204,214,3e-06	Rask_block_14,217,236,3.6e-06	Rask_block_5,253,271,1.1e-09	Rask_block_60,283,306,0.00015	Rask_block_2,307,324,1.1e-12	Rask_block_12,325,344,1.7e-06	Rask_block_7,348,372,2.4e-08
NS_L7_19_Contig5910_frame_3	Rask_block_68,1,18,4.6e-05	Rask_block_23,24,43,7.4e-05	Rask_block_63,58,79,1.4e-11	Rask_block_67,95,107,1.3e-05	Rask_block_8,113,145,1.4e-16	Rask_block_1,155,180,1.7e-11	Rask_block_32,189,224,2.5e-12	Rask_block_10,239,266,1.1e-08	Rask_block_26,283,296,0.001	Rask_block_15,333,355,0.0015	Rask_block_35,358,373,6.5e-07	Rask_block_4,381,398,4.9e-07	Rask_block_73,442,455,0.026	Rask_block_11,460,480,6.6e-10	Rask_block_158,481,502,1.9e-07	Rask_block_16,522,537,4.7e-05	Rask_block_3,538,553,8.6e-07	Rask_block_510,559,571,9.4e-05	Rask_block_419,572,581,0.0001	Rask_block_27,586,605,0.0006	Rask_block_5,627,646,4.6e-05	Rask_block_249,647,664,0.2
NS_L8_51_Contig2312_frame_2	Rask_block_3,1,11,0.0015	Rask_block_386,12,20,0.00024	Rask_block_14,25,45,4.2e-08	Rask_block_64,48,59,0.016	Rask_block_5,63,80,1.1e-09	Rask_block_36,85,111,1.5e-11	Rask_block_2,116,133,1.6e-12	Rask_block_12,134,153,5.9e-08	Rask_block_7,157,181,2.1e-08	Rask_block_1,184,209,4.6e-08	Rask_block_184,212,232,1e-06	Rask_block_9,235,261,2e-10	Rask_block_6,278,303,1.7e-13	Rask_block_438,305,323,9.9e-06	Rask_block_23,326,349,1.2e-08	Rask_block_57,360,373,4.8e-05	Rask_block_8,399,429,5.3e-10	Rask_block_1,438,463,1.7e-14	Rask_block_32,478,509,6.1e-08
NS_L1_80_Contig36107_frame_-1	Rask_block_287,8,21,4.4e-08	Rask_block_8,22,55,1.4e-17	Rask_block_1,64,89,7.1e-13	Rask_block_24,100,140,4.5e-19	Rask_block_10,148,174,7.2e-10	Rask_block_31,194,210,0.0018	Rask_block_56,213,230,0.00015	Rask_block_28,253,260,0.17	Rask_block_21,286,311,5.8e-15
S_L8_56_33521_frame_3	Rask_block_15,23,47,2.7e-05	Rask_block_4,65,81,2.6e-07	Rask_block_11,92,111,2.2e-08	Rask_block_16,113,128,0.00048	Rask_block_3,130,147,5.2e-08	Rask_block_82,150,171,2.5e-07	Rask_block_5,186,205,3.4e-10	Rask_block_94,218,240,2e-09	Rask_block_2,241,258,2.8e-12	Rask_block_48,259,277,0.013	Rask_block_1,295,320,2.5e-07	Rask_block_45,330,368,2.9e-12	Rask_block_18,372,391,2.2e-08	Rask_block_28,395,407,0.0096	Rask_block_49,414,433,0.00099	Rask_block_49,439,458,0.0091	Rask_block_26,486,497,0.13	Rask_block_30,499,524,0.069	Rask_block_15,526,550,4e-06	Rask_block_35,555,571,4.1e-07	Rask_block_4,581,595,1.7e-05	Rask_block_11,605,625,8.4e-11	Rask_block_289,627,639,9e-05	Rask_block_16,652,667,1.7e-05	Rask_block_3,668,685,3.3e-09
S_L8_68_Contig5943_frame_-1	Rask_block_8,1,23,8.4e-10	Rask_block_1,33,58,6.3e-13	Rask_block_516,59,69,1.7e-05	Rask_block_24,70,111,1e-17	Rask_block_10,116,140,5.3e-11	Rask_block_31,159,181,1.8e-06	Rask_block_127,183,209,7.6e-05
NS_L7_19_Contig9846_frame_-2	Rask_block_87,20,34,0.0014	Rask_block_2,38,52,4.2e-07	Rask_block_12,53,70,7.6e-07	Rask_block_7,74,98,7.4e-07	Rask_block_1,101,126,4.9e-10	Rask_block_458,175,181,0.17	Rask_block_6,182,206,6.6e-12	Rask_block_149,209,224,0.0096	Rask_block_50,226,253,2.6e-08	Rask_block_22,261,283,3.8e-12	Rask_block_8,299,331,5.1e-15	Rask_block_1,340,365,3.8e-13	Rask_block_24,378,418,2.5e-10	Rask_block_10,425,448,1.5e-10	Rask_block_224,456,466,0.0055	Rask_block_31,472,495,1.3e-09	Rask_block_56,497,515,0.0014	Rask_block_205,518,531,5.1e-09	Rask_block_33,539,555,0.14	Rask_block_21,567,592,2.7e-12
S_L6_19_126527_frame_3	Rask_block_9,8,33,4.9e-14	Rask_block_449,38,44,0.066	Rask_block_6,49,72,4.8e-14	Rask_block_150,75,93,0.038	Rask_block_23,97,113,2.8e-05	Rask_block_57,129,148,1.3e-10	Rask_block_8,160,192,5.4e-15	Rask_block_1,201,226,3.7e-11	Rask_block_121,233,259,7.9e-15
NS_L8_59_Contig5606_frame_3	Rask_block_20,44,65,1.2e-05	Rask_block_17,68,97,4.6e-08	Rask_block_19,101,133,1.6e-14	Rask_block_4,142,159,9.8e-06	Rask_block_13,168,189,5.3e-09	Rask_block_3,203,220,2.7e-06	Rask_block_171,221,231,7.9e-05	Rask_block_14,234,256,2e-07	Rask_block_64,264,277,5.4e-05	Rask_block_5,279,298,9.3e-12	Rask_block_60,308,332,2.3e-05	Rask_block_2,333,350,3.9e-12	Rask_block_12,351,369,1.9e-07	Rask_block_7,371,395,1.6e-08	Rask_block_1,397,422,5.9e-10	Rask_block_70,423,451,4.7e-09	Rask_block_9,452,478,1.1e-12	Rask_block_268,479,490,2.4e-05	Rask_block_6,493,517,6.4e-11	Rask_block_23,541,562,0.0021	Rask_block_57,573,583,0.0041	Rask_block_116,593,602,0.016	Rask_block_8,607,640,8.1e-16	Rask_block_1,647,670,1.1e-10	Rask_block_32,682,717,1.2e-08	Rask_block_10,730,756,1.2e-06	Rask_block_26,800,816,1.4e-05	Rask_block_15,818,841,1.8e-08	Rask_block_139,847,861,0.00015	Rask_block_4,863,880,5e-08	Rask_block_11,888,908,3.5e-10	Rask_block_16,916,926,0.027	Rask_block_3,927,943,1.1e-06	Rask_block_86,945,965,1.3e-08	Rask_block_5,979,998,2.1e-11	Rask_block_133,999,1024,8.1e-15	Rask_block_427,1025,1033,0.004	Rask_block_2,1036,1052,3.8e-11	Rask_block_48,1053,1069,0.0011	Rask_block_1,1080,1105,9.5e-06
S_L7_20_Contig3354_frame_3	Rask_block_264,22,41,1.5e-09	Rask_block_20,42,63,1e-09	Rask_block_17,68,105,6.5e-10	Rask_block_19,110,141,3.7e-12	Rask_block_4,151,168,1.9e-08	Rask_block_13,177,198,2.6e-09	Rask_block_464,199,209,3.2e-07	Rask_block_3,210,227,2.8e-07	Rask_block_486,228,234,0.0021
NS_L8_59_27644_frm1_orf3	Rask_block_20,20,41,6.4e-10	Rask_block_17,44,75,3.5e-10	Rask_block_19,79,112,1.7e-13	Rask_block_4,119,136,3e-05	Rask_block_13,145,166,1.7e-09	Rask_block_3,180,197,1.2e-06	Rask_block_54,198,212,3.4e-06	Rask_block_14,215,234,1.2e-05	Rask_block_345,240,250,1.8e-05	Rask_block_5,251,269,5.7e-10	Rask_block_36,276,301,2.6e-09	Rask_block_2,306,323,3.9e-12	Rask_block_12,325,342,1.8e-07	Rask_block_7,346,371,7.5e-11	Rask_block_1,373,398,1.7e-07	Rask_block_70,399,426,1.5e-12	Rask_block_9,427,453,2.2e-13	Rask_block_413,456,467,0.036	Rask_block_6,471,495,7.7e-12	Rask_block_251,498,515,1.4e-06	Rask_block_23,517,538,3.6e-07	Rask_block_57,551,564,0.0001	Rask_block_8,585,618,1.7e-13	Rask_block_1,627,652,1.1e-13	Rask_block_32,661,697,1.4e-10	Rask_block_10,712,739,5.3e-10	Rask_block_52,758,775,0.041	Rask_block_65,783,815,1.4e-15	Rask_block_53,825,843,2.4e-05	Rask_block_4,854,870,8.8e-08	Rask_block_13,886,907,5.1e-10	Rask_block_3,916,933,3.4e-09	Rask_block_14,946,968,0.00078	Rask_block_5,979,998,1.7e-08	Rask_block_2,1012,1029,2.9e-11	Rask_block_59,1031,1050,5.7e-07	Rask_block_1,1066,1091,1.1e-07	Rask_block_614,1092,1106,5.6e-07
NS_L1_73_Contig35658_frame_-1	Rask_block_13,10,31,1.1e-08	Rask_block_215,32,42,0.0092	Rask_block_3,43,60,2.3e-06	Rask_block_79,61,76,3.4e-08	Rask_block_14,77,97,4.9e-05	Rask_block_64,103,115,5.4e-05	Rask_block_5,117,136,1.5e-08	Rask_block_36,139,166,2.5e-12	Rask_block_2,171,188,3.4e-12	Rask_block_12,189,205,1.2e-05	Rask_block_7,211,236,2.4e-09	Rask_block_1,238,263,5.4e-12	Rask_block_70,264,288,3.9e-07	Rask_block_9,289,314,2.3e-10	Rask_block_118,316,330,1.9e-05	Rask_block_6,335,357,1.1e-11	Rask_block_181,362,377,0.015	Rask_block_23,380,402,1.5e-07	Rask_block_57,411,429,1.9e-05	Rask_block_8,440,472,1.7e-13	Rask_block_1,481,506,2.8e-12	Rask_block_32,514,542,7.7e-07	Rask_block_10,565,592,5.6e-09	Rask_block_49,597,611,0.11	Rask_block_506,617,635,3e-07	Rask_block_15,670,690,5.5e-05	Rask_block_35,696,711,8.4e-07	Rask_block_4,724,741,1e-05	Rask_block_11,768,788,3.4e-12	Rask_block_77,789,806,1.7e-05	Rask_block_16,812,827,6.3e-05	Rask_block_3,828,845,1.8e-09	Rask_block_27,857,874,0.011	Rask_block_5,889,907,5.7e-10	Rask_block_29,931,949,0.054	Rask_block_498,956,965,2.4e-05	Rask_block_2,967,983,8.4e-08
S_L7_20_Contig5757_frame_3	Rask_block_7,1,19,3.8e-07	Rask_block_1,21,46,3.9e-11	Rask_block_151,47,64,9.4e-07	Rask_block_9,65,91,7.2e-12	Rask_block_6,102,126,2e-12	Rask_block_202,128,172,3.3e-27	Rask_block_22,176,196,1.8e-09
NS_L8_50_Contig4193_frame_-2	Rask_block_5,2,17,4.5e-11	Rask_block_92,39,55,9.1e-07	Rask_block_2,56,73,2.4e-10	Rask_block_99,74,105,6.2e-15	Rask_block_1,107,132,3.1e-08	Rask_block_592,134,181,6.5e-21	Rask_block_93,187,204,3.4e-08	Rask_block_18,212,230,6.8e-06	Rask_block_76,247,283,1.1e-08
NS_L1_88_Contig15734_frame_1	Rask_block_12,1,18,1.5e-07	Rask_block_7,24,49,6e-10	Rask_block_1,51,75,7.9e-10	Rask_block_34,81,99,0.00033	Rask_block_9,107,133,1.1e-05	Rask_block_596,136,146,1.4e-05	Rask_block_6,155,179,1.3e-14	Rask_block_23,205,228,5.8e-12	Rask_block_57,238,258,3e-08	Rask_block_8,268,298,1.1e-09	Rask_block_1,310,335,7e-12	Rask_block_32,344,379,1.4e-13	Rask_block_10,394,421,6.9e-09	Rask_block_101,423,446,1.7e-09	Rask_block_52,453,468,0.014	Rask_block_65,473,507,9.7e-13	Rask_block_53,516,535,0.11	Rask_block_4,545,562,9.7e-08	Rask_block_520,563,575,2.3e-07	Rask_block_13,576,597,5.2e-09	Rask_block_3,610,626,1.4e-08	Rask_block_146,627,638,1.7e-06	Rask_block_14,639,654,6.3e-05
S_L7_20_Contig6536_frame_2	Rask_block_1,1,20,2.5e-07	Rask_block_72,21,37,4.1e-05	Rask_block_9,39,61,4.3e-06	Rask_block_6,78,101,4.3e-10	Rask_block_180,104,118,0.0011	Rask_block_50,121,147,9.2e-11	Rask_block_22,150,172,2.4e-13	Rask_block_107,174,188,7.3e-05	Rask_block_8,192,224,2.9e-15	Rask_block_1,234,259,7.9e-13	Rask_block_24,269,308,3.3e-15	Rask_block_10,320,342,0.00017	Rask_block_271,354,360,0.076	Rask_block_31,361,377,1.2e-06	Rask_block_56,382,398,0.0077	Rask_block_21,445,457,0.022
NS_L6_24_Contig5820_frame_2	Rask_block_24,2,24,0.0004	Rask_block_10,35,61,4.8e-09	Rask_block_31,77,97,0.0057	Rask_block_26,136,148,3.7e-07	Rask_block_341,157,174,4.3e-09	Rask_block_295,177,194,5.8e-09	Rask_block_21,195,220,1.5e-13
NS_L1_84_Contig9992_frame_-3	Rask_block_61,1,16,5.1e-06	Rask_block_18,29,47,4.1e-07	Rask_block_612,50,61,0.005	Rask_block_15,64,88,0.00016	Rask_block_139,94,107,1.6e-05	Rask_block_4,109,124,8.1e-08	Rask_block_11,138,158,4.2e-10	Rask_block_16,161,177,4.1e-05	Rask_block_3,178,194,1.4e-07	Rask_block_86,196,216,1.4e-07	Rask_block_5,229,248,2e-09	Rask_block_609,249,254,0.34
NS_L7_27_Contig6898_manual_selection_frame_3	Rask_block_10,2,19,0.00029	Rask_block_491,34,44,0.00044	Rask_block_31,45,63,3.3e-05	Rask_block_30,115,134,0.1	Rask_block_95,136,151,9.8e-05	Rask_block_21,154,179,1.1e-12
NS_L1_88_Contig17037_frame_1	Rask_block_61,1,14,0.00027	Rask_block_18,24,42,5.4e-08	Rask_block_26,84,96,0.0071	Rask_block_332,126,140,8.1e-05	Rask_block_15,141,162,4.4e-08	Rask_block_132,182,203,7.2e-06	Rask_block_4,204,221,2.9e-06	Rask_block_11,269,289,3.8e-11	Rask_block_158,290,309,3.7e-09	Rask_block_16,322,337,0.0061	Rask_block_3,338,355,1.4e-08
NS_L6_24_Contig5394_frame_1	Rask_block_451,5,25,7.3e-13	Rask_block_23,27,49,5.7e-09	Rask_block_57,60,80,2.8e-10	Rask_block_8,91,123,2.9e-12	Rask_block_1,132,157,1.3e-14	Rask_block_121,162,194,8.5e-14
NS_L8_55_Contig5800_manual_selection_frame_1	Rask_block_39,1,22,1.4e-13	Rask_block_40,32,46,2.6e-10	Rask_block_38,49,109,1.5e-35	Rask_block_44,111,133,2.1e-12	Rask_block_113,135,142,0.0011	Rask_block_203,145,153,8.6e-06	Rask_block_46,171,198,3e-19	Rask_block_152,199,209,2.8e-05	Rask_block_111,211,219,8e-06	Rask_block_69,220,231,7.6e-08	Rask_block_80,232,238,0.0053
S_L7_20_33016_frame_-1	Rask_block_13,1,13,0.0056	Rask_block_102,14,24,0.011	Rask_block_3,28,44,1.9e-07	Rask_block_79,45,60,5e-07	Rask_block_14,61,83,7.2e-09	Rask_block_64,86,99,6.9e-06	Rask_block_5,101,119,1.2e-10	Rask_block_36,123,152,3.6e-15	Rask_block_153,153,158,0.042	Rask_block_2,159,176,9.2e-13	Rask_block_12,177,195,3.3e-07	Rask_block_7,200,225,2.3e-10	Rask_block_1,227,252,7.6e-12	Rask_block_34,263,281,0.037	Rask_block_9,285,311,3.1e-13
S_L7_16_Contig4303_frame_-2	Rask_block_26,20,31,0.061	Rask_block_26,40,51,0.21	Rask_block_332,64,78,8.8e-06	Rask_block_15,79,100,7.3e-07	Rask_block_35,106,122,1.1e-06	Rask_block_4,148,165,1.4e-06	Rask_block_106,179,190,0.00078	Rask_block_11,194,214,6.4e-12	Rask_block_109,215,234,0.00042	Rask_block_16,239,255,3.2e-06	Rask_block_3,256,272,1.7e-08	Rask_block_156,276,288,1.3e-05	Rask_block_27,292,308,0.0024	Rask_block_5,344,361,1.5e-10	Rask_block_29,393,415,0.0078	Rask_block_198,421,429,0.0004	Rask_block_2,430,442,2.2e-05
NS_L1_80_Contig9593_frame_-1	Rask_block_20,56,75,1.2e-07	Rask_block_17,81,115,9.6e-12	Rask_block_19,117,150,3.5e-13	Rask_block_4,156,171,3e-08
S_L7_20_33216_frame_-3	Rask_block_23,3,25,4.6e-08	Rask_block_63,36,53,4.7e-10	Rask_block_114,55,71,2.6e-08	Rask_block_67,72,84,3.4e-07	Rask_block_8,100,133,1.5e-16	Rask_block_1,142,167,1.7e-12	Rask_block_512,169,187,3.9e-07	Rask_block_32,191,227,3.1e-14	Rask_block_10,239,266,2.2e-09	Rask_block_49,271,288,0.0048	Rask_block_26,293,309,0.0001	Rask_block_30,320,345,0.0037	Rask_block_15,346,368,6e-10	Rask_block_35,372,389,1.3e-05	Rask_block_4,397,413,8.9e-06	Rask_block_81,418,436,8.4e-05
S_L8_68_Contig5969_frame_2	Rask_block_2,1,10,0.014	Rask_block_12,11,26,0.0022	Rask_block_7,34,59,1e-11	Rask_block_1,61,86,8e-11	Rask_block_122,87,105,1e-08	Rask_block_9,108,131,1.2e-06	Rask_block_458,135,145,5.1e-05	Rask_block_6,146,171,7.9e-13	Rask_block_103,180,197,1.7e-07	Rask_block_85,200,220,7.5e-11	Rask_block_22,232,253,6.3e-10
S_L7_20_Contig6335_frame_3	Rask_block_52,10,26,0.00053	Rask_block_65,31,66,4.7e-19	Rask_block_53,75,94,4.6e-09	Rask_block_4,105,122,6.3e-09	Rask_block_584,123,139,7e-08	Rask_block_13,140,161,1.7e-09	Rask_block_3,170,186,2e-08
NS_L1_80_Contig33400_frame_-3	Rask_block_8,1,36,3.4e-14	Rask_block_1,45,69,5.7e-10	Rask_block_24,84,124,1.7e-15	Rask_block_10,132,156,1.5e-08	Rask_block_224,163,173,7.7e-05	Rask_block_31,175,193,6.2e-08	Rask_block_56,196,213,2.1e-05	Rask_block_33,245,263,0.00057
NS_L1_84_Contig8374_frame_3	Rask_block_407,10,22,1.3e-07	Rask_block_76,26,60,2.6e-09	Rask_block_4,61,76,4.8e-05	Rask_block_3,114,131,8.1e-08	Rask_block_274,143,159,0.0054	Rask_block_5,163,182,4e-10	Rask_block_2,204,220,1.5e-11
NS_L1_80_Contig32245_frame_1	Rask_block_449,6,16,1.3e-05	Rask_block_6,18,42,3.7e-15	Rask_block_150,47,62,0.00061	Rask_block_23,66,89,6.2e-09	Rask_block_173,90,97,0.21	Rask_block_57,100,118,2.6e-10	Rask_block_8,130,163,1.8e-15	Rask_block_1,172,197,1.2e-09	Rask_block_121,203,241,3.7e-22	Rask_block_10,257,284,1e-06	Rask_block_141,285,302,6.1e-08	Rask_block_52,304,318,0.011	Rask_block_65,327,362,4.5e-16	Rask_block_53,371,391,7.1e-05
NS_L8_59_Contig2319_frame_1	Rask_block_4,3,20,2.5e-05	Rask_block_189,25,35,0.16	Rask_block_13,37,58,1.1e-08	Rask_block_3,67,84,4e-06	Rask_block_174,85,95,0.00014	Rask_block_14,97,119,5.1e-06	Rask_block_5,129,146,2.1e-10	Rask_block_259,153,165,2e-05	Rask_block_2,166,183,1.4e-10	Rask_block_59,184,204,3.2e-09	Rask_block_1,213,238,4.7e-12	Rask_block_62,250,270,3e-05	Rask_block_61,276,301,3.2e-13	Rask_block_18,317,336,3.4e-06	Rask_block_15,351,374,1.8e-07	Rask_block_4,393,410,3.7e-07	Rask_block_11,420,440,8.3e-12	Rask_block_16,448,461,0.00027	Rask_block_3,462,479,2.7e-07	Rask_block_86,480,500,0.00011	Rask_block_5,515,534,2.9e-10	Rask_block_90,535,549,4.8e-05	Rask_block_167,551,568,4.7e-08	Rask_block_2,569,585,4.2e-10	Rask_block_1,614,639,6.8e-08	Rask_block_45,655,686,4.4e-09	Rask_block_18,699,717,1.6e-05	Rask_block_612,721,729,0.063	Rask_block_15,732,754,5.5e-06	Rask_block_4,774,789,6e-07	Rask_block_11,803,823,5.9e-09	Rask_block_16,829,844,0.0011	Rask_block_3,845,862,1.3e-06	Rask_block_82,865,885,9.1e-05	Rask_block_5,899,918,2.6e-07	Rask_block_167,934,951,2.1e-06	Rask_block_2,953,969,4.7e-11	Rask_block_48,971,989,9.7e-06	Rask_block_1,999,1024,1.7e-10	Rask_block_45,1038,1070,3.8e-13	Rask_block_18,1080,1099,1.3e-05	Rask_block_169,1102,1110,0.027	Rask_block_49,1124,1143,0.0012	Rask_block_49,1150,1168,0.0022	Rask_block_26,1187,1199,0.00018	Rask_block_15,1240,1261,4.7e-06	Rask_block_35,1265,1281,2.4e-07	Rask_block_34,1283,1299,0.14	Rask_block_4,1306,1323,6.4e-06
NS_L1_80_Contig33598_frame_-1	Rask_block_16,1,11,0.012	Rask_block_3,12,29,1.2e-08	Rask_block_228,30,41,5.5e-06	Rask_block_27,42,61,0.00036	Rask_block_5,73,92,6e-10	Rask_block_55,102,119,5.4e-06	Rask_block_29,123,145,1.9e-07	Rask_block_2,158,174,6.8e-11	Rask_block_12,175,191,4e-05	Rask_block_7,197,220,5.6e-08	Rask_block_1,223,248,1.5e-11	Rask_block_72,250,265,0.00014	Rask_block_9,266,289,4.6e-07	Rask_block_6,304,329,4.2e-11	Rask_block_243,335,346,0.0012	Rask_block_50,348,374,1.4e-08	Rask_block_22,378,400,3.5e-11	Rask_block_172,402,411,0.00056	Rask_block_8,419,451,5.1e-14	Rask_block_1,460,478,1.5e-08
NS_L6_21_Contig12433_frame_3	Rask_block_35,13,30,1.9e-07	Rask_block_4,36,53,3.3e-06	Rask_block_81,65,82,0.00023	Rask_block_81,83,94,0.11	Rask_block_11,108,128,6.4e-10	Rask_block_158,129,151,5.6e-11	Rask_block_16,152,167,0.00015	Rask_block_3,168,185,4.9e-10	Rask_block_228,186,195,0.0099	Rask_block_82,199,219,2.1e-05	Rask_block_5,233,252,6.4e-11	Rask_block_55,253,272,0.17	Rask_block_29,283,303,4.2e-07	Rask_block_87,312,324,0.0015
NS_L7_29_Contig7083_frame_1	Rask_block_4,1,15,0.0013	Rask_block_13,27,48,3.6e-09	Rask_block_3,60,77,2.4e-07	Rask_block_79,78,93,1.5e-06	Rask_block_14,94,117,3e-07	Rask_block_345,118,128,0.0025	Rask_block_5,129,147,6.1e-11	Rask_block_36,150,177,3.5e-13	Rask_block_153,188,194,0.0018	Rask_block_2,195,212,3e-13	Rask_block_130,213,226,7.3e-11	Rask_block_7,235,259,2.2e-10	Rask_block_1,262,277,0.015
NS_L1_95_Contig7955_frame_-3	Rask_block_4,1,14,0.00021	Rask_block_13,26,47,7.8e-12	Rask_block_3,62,78,7.6e-07	Rask_block_54,79,93,1.2e-06	Rask_block_14,96,115,6.8e-06	Rask_block_64,122,135,0.00034	Rask_block_5,137,155,2.4e-10	Rask_block_36,162,192,4.1e-16	Rask_block_493,194,200,0.065	Rask_block_153,202,208,0.0014	Rask_block_2,209,226,6.1e-13
NS_L7_19_Contig5715_frame_2	Rask_block_13,1,20,7.3e-07	Rask_block_3,35,51,2e-06	Rask_block_54,52,66,5.4e-06	Rask_block_14,69,92,0.0016	Rask_block_5,103,120,5.2e-09	Rask_block_36,125,154,1.9e-13	Rask_block_2,159,175,1.1e-11	Rask_block_12,177,196,4.4e-08	Rask_block_7,198,223,4.6e-10	Rask_block_1,225,250,5.6e-11	Rask_block_70,251,275,7.3e-06	Rask_block_9,277,303,4.1e-11	Rask_block_118,305,318,6.2e-05	Rask_block_6,320,344,2.4e-10	Rask_block_23,367,390,3.8e-06	Rask_block_57,400,419,3.2e-08	Rask_block_8,430,462,2.2e-10	Rask_block_1,470,495,9.4e-13	Rask_block_32,507,543,2.8e-09	Rask_block_10,559,584,1.9e-05	Rask_block_26,623,633,0.14	Rask_block_30,654,678,0.035	Rask_block_15,679,700,6.3e-05	Rask_block_35,706,720,4e-05	Rask_block_4,743,760,1.4e-06	Rask_block_106,784,798,0.00097	Rask_block_11,804,824,1.2e-10	Rask_block_16,854,868,0.0002	Rask_block_3,869,885,3.4e-08	Rask_block_156,889,901,1.2e-06	Rask_block_27,905,925,0.013	Rask_block_5,928,946,1.2e-05	Rask_block_29,974,995,0.0004	Rask_block_105,1002,1012,0.0002	Rask_block_2,1013,1029,3.6e-08
NS_L1_84_100612_frame_3	Rask_block_86,10,30,0.00011	Rask_block_5,45,64,1.4e-10	Rask_block_133,65,89,0.0011	Rask_block_2,99,115,2.5e-11	Rask_block_136,116,139,5.5e-12	Rask_block_1,144,169,0.0011	Rask_block_45,183,207,6.2e-08	Rask_block_78,212,232,4.7e-08	Rask_block_15,240,266,6.3e-06	Rask_block_35,271,286,0.0002	Rask_block_4,322,337,3.5e-06	Rask_block_11,347,367,9.9e-08
NS_L6_18_Contig14787_frame_-2	Rask_block_20,11,29,2.4e-05	Rask_block_17,36,70,1.1e-11	Rask_block_19,72,104,6.5e-13	Rask_block_4,111,128,5.3e-09	Rask_block_13,137,158,9.5e-11	Rask_block_3,172,189,1.4e-07	Rask_block_54,190,201,0.016	Rask_block_14,202,224,1.4e-09	Rask_block_64,230,240,0.0042	Rask_block_5,242,261,1.9e-10	Rask_block_60,272,295,3.1e-07	Rask_block_2,296,313,1.3e-12	Rask_block_12,314,333,1.4e-08	Rask_block_7,335,360,2.1e-09	Rask_block_1,362,387,3.5e-10	Rask_block_70,388,413,2.5e-12	Rask_block_9,414,439,7.7e-10
S_L3_13_Contig6074_frame_-2	Rask_block_210,11,24,0.00068	Rask_block_5,25,43,3.8e-10	Rask_block_36,46,74,5.5e-15	Rask_block_163,76,82,0.0041	Rask_block_2,83,100,7.7e-13	Rask_block_12,102,119,3.3e-05	Rask_block_7,122,146,9.2e-10	Rask_block_1,149,174,2.2e-09	Rask_block_9,206,232,1.5e-10	Rask_block_75,237,253,5.2e-09	Rask_block_6,256,281,6e-16	Rask_block_143,284,301,1.5e-06	Rask_block_23,302,325,5.8e-08	Rask_block_154,328,343,1.5e-05	Rask_block_63,372,391,7.4e-10	Rask_block_116,402,414,0.00011	Rask_block_8,417,449,5.7e-16	Rask_block_226,450,459,0.021	Rask_block_1,460,485,8.3e-10	Rask_block_32,503,539,5e-13	Rask_block_10,556,580,2.4e-07
S_L3_13_Contig5997_frm2_orf5	Rask_block_71,11,21,0.37	Rask_block_20,23,45,1.6e-06	Rask_block_17,48,78,4.6e-06	Rask_block_19,85,117,8.3e-14	Rask_block_4,123,140,8.6e-09	Rask_block_13,149,170,1e-11	Rask_block_3,184,201,2.2e-07	Rask_block_204,202,212,2e-06	Rask_block_14,215,226,0.043	Rask_block_5,243,261,3.1e-11
NS_L8_59_Contig5949_frame_1	Rask_block_1,19,43,1.2e-12	Rask_block_212,45,97,7.7e-28	Rask_block_10,104,128,2.6e-07	Rask_block_491,136,146,5.1e-06	Rask_block_31,149,167,0.00023	Rask_block_127,170,207,0.0051	Rask_block_33,220,237,0.00038	Rask_block_21,248,272,4.3e-14	Rask_block_41,274,291,0.00051
NS_L1_84_Contig4170_frame_2	Rask_block_9,12,35,3.6e-06	Rask_block_6,51,76,8.3e-15	Rask_block_477,79,100,6.1e-12	Rask_block_85,102,117,0.00043	Rask_block_22,137,148,0.0015	Rask_block_176,151,163,0.00038	Rask_block_8,164,197,9.9e-18	Rask_block_1,208,233,3.5e-09	Rask_block_24,245,284,1.8e-12
NS_L1_95_Contig6801_frame_3	Rask_block_20,36,58,4.9e-10	Rask_block_17,70,101,5.5e-08	Rask_block_19,106,142,1e-13	Rask_block_4,148,165,3.7e-08	Rask_block_13,172,193,1.4e-11	Rask_block_381,195,204,0.0013	Rask_block_3,206,222,1.3e-06	Rask_block_79,223,238,1.9e-09	Rask_block_14,239,261,0.0001	Rask_block_64,266,279,0.0068	Rask_block_5,281,300,7.4e-10	Rask_block_36,303,328,4e-11	Rask_block_88,337,343,0.0019	Rask_block_2,344,354,0.00012
NS_L7_27_Contig2230_frame_3	Rask_block_19,1,22,1.4e-06	Rask_block_4,31,45,2.2e-06	Rask_block_13,56,77,7.2e-09	Rask_block_3,85,102,5.6e-07	Rask_block_219,103,112,0.00014	Rask_block_14,114,137,0.00013	Rask_block_179,140,148,4.9e-05	Rask_block_5,149,167,1.2e-09	Rask_block_367,169,177,0.00043	Rask_block_60,179,203,0.00098	Rask_block_2,204,221,6e-12	Rask_block_12,222,241,9.5e-07	Rask_block_7,245,270,2.7e-11	Rask_block_1,272,297,2.2e-12
NS_L7_29_Contig7939_frm-3_orf3	Rask_block_20,14,35,8.2e-09	Rask_block_17,40,72,4.5e-09	Rask_block_19,79,115,4.3e-15	Rask_block_4,121,138,1.9e-08	Rask_block_13,145,166,4.8e-11	Rask_block_102,167,179,1.4e-05	Rask_block_3,180,197,3.6e-07	Rask_block_79,198,206,0.024
NS_L1_84_Contig10103_frame_-2	Rask_block_34,20,37,0.001	Rask_block_9,41,66,6.6e-10	Rask_block_348,68,88,2.4e-13	Rask_block_6,90,114,1.4e-13	Rask_block_68,116,134,4.4e-06	Rask_block_23,136,159,6.6e-07	Rask_block_63,165,184,4.4e-10	Rask_block_67,202,212,0.00018	Rask_block_316,221,231,0.00024	Rask_block_8,233,264,5.6e-15	Rask_block_1,274,299,3.9e-12	Rask_block_334,301,312,0.00068	Rask_block_32,315,353,3e-15	Rask_block_125,380,391,0.036	Rask_block_10,392,414,1.8e-07	Rask_block_26,438,449,0.12	Rask_block_30,462,487,0.095	Rask_block_15,488,510,1.4e-05	Rask_block_35,514,529,0.00074	Rask_block_4,547,564,1.1e-05	Rask_block_11,605,625,3.9e-10	Rask_block_16,651,665,0.0022	Rask_block_3,667,682,1.6e-07	Rask_block_437,688,702,4.9e-05	Rask_block_177,704,713,0.0012	Rask_block_27,716,735,2.8e-06	Rask_block_5,745,764,4.3e-12	Rask_block_29,800,820,3.4e-06	Rask_block_87,829,842,0.0012	Rask_block_2,843,859,2e-08
NS_L8_59_27480_frame_2	Rask_block_2,1,14,9.6e-06	Rask_block_12,15,30,0.0022	Rask_block_7,35,59,0.004	Rask_block_1,61,86,8.3e-10	Rask_block_72,87,103,4.9e-05	Rask_block_9,104,125,9.6e-05	Rask_block_6,139,161,4.9e-12	Rask_block_50,180,207,3.3e-06	Rask_block_22,210,231,4.8e-11	Rask_block_287,235,252,0.00088	Rask_block_8,253,286,1.9e-17	Rask_block_1,295,320,6.8e-11	Rask_block_24,333,373,9.1e-17	Rask_block_10,381,408,1.1e-11	Rask_block_31,423,446,4.2e-05	Rask_block_56,448,464,0.0068	Rask_block_21,517,541,4.5e-11
NS_L8_50_Contig7616_frame_1	Rask_block_22,1,16,1.3e-05	Rask_block_555,17,25,8.5e-06	Rask_block_8,32,65,4e-18	Rask_block_1,74,99,3.2e-14	Rask_block_24,110,151,2.5e-15	Rask_block_10,158,183,1e-11	Rask_block_31,193,215,1.1e-06	Rask_block_593,234,246,0.45	Rask_block_33,288,304,0.043	Rask_block_21,316,332,0.00049
S_L7_20_Contig5286_frame_2	Rask_block_8,1,18,2.3e-05	Rask_block_1,28,53,4.4e-12	Rask_block_24,65,105,1.7e-17	Rask_block_10,112,138,1e-11	Rask_block_31,148,166,3.9e-06	Rask_block_127,169,191,1.8e-06	Rask_block_33,204,222,0.0042	Rask_block_21,234,259,2.5e-12
NS_L1_95_Contig9050_frame_3	Rask_block_430,3,10,0.075	Rask_block_62,15,38,0.00022	Rask_block_61,44,68,4.5e-15	Rask_block_18,83,102,2.9e-07	Rask_block_95,107,122,0.00086	Rask_block_28,131,143,1.6e-05	Rask_block_49,162,180,0.0011
S_L7_42_Contig2208_frm2_orf6	Rask_block_378,6,15,6e-05	Rask_block_20,23,44,2.6e-06	Rask_block_17,48,80,3.6e-09	Rask_block_19,82,115,7.7e-16	Rask_block_4,122,139,2.4e-06	Rask_block_13,148,169,2.2e-08	Rask_block_416,170,180,3.7e-07	Rask_block_3,181,198,3.3e-07	Rask_block_54,199,213,6.9e-07	Rask_block_14,216,239,1.2e-05	Rask_block_556,240,250,1.1e-06	Rask_block_5,251,270,2.3e-10	Rask_block_36,273,301,8.3e-13	Rask_block_2,306,323,9.8e-13	Rask_block_12,324,336,0.024
NS_L6_24_Contig5763_frame_2	Rask_block_1,13,38,3.3e-10	Rask_block_122,39,54,1.4e-05	Rask_block_9,61,83,2.5e-05	Rask_block_6,97,118,1.4e-08	Rask_block_103,129,145,1.4e-08	Rask_block_85,147,167,4.2e-12	Rask_block_571,168,180,0.023	Rask_block_22,181,202,1.9e-09	Rask_block_83,206,215,0.06
S_L8_56_101559_frame_-1	Rask_block_2,2,16,1.9e-07	Rask_block_312,22,49,5.3e-20	Rask_block_1,52,77,7.1e-12	Rask_block_351,79,96,2.9e-05	Rask_block_115,97,114,2.5e-05	Rask_block_335,116,301,2.7e-70	Rask_block_13,335,355,0.00072	Rask_block_620,356,365,2.5e-05	Rask_block_3,367,383,1e-06	Rask_block_325,384,394,9.1e-07	Rask_block_14,395,423,6e-06	Rask_block_5,430,449,5.3e-07	Rask_block_328,468,489,2.7e-11	Rask_block_2,491,507,3.3e-07	Rask_block_343,508,684,2.8e-104	Rask_block_18,686,704,0.00013	Rask_block_344,705,723,1.9e-15	Rask_block_553,724,737,1.4e-06	Rask_block_342,741,829,2.9e-53	Rask_block_1,832,857,2.1e-10	Rask_block_329,864,999,9.3e-84	Rask_block_4,1002,1018,4.5e-05	Rask_block_307,1021,1062,5.2e-30	Rask_block_484,1074,1095,3.1e-12	Rask_block_3,1096,1113,0.0012	Rask_block_314,1114,1149,3.8e-26	Rask_block_5,1153,1171,5.6e-05	Rask_block_313,1174,1196,9.5e-17	Rask_block_2,1198,1214,7.9e-06	Rask_block_306,1215,1227,3.8e-09	Rask_block_428,1230,1251,3.8e-17	Rask_block_1,1252,1277,4.8e-12	Rask_block_305,1281,1370,1.1e-60	Rask_block_4,1373,1387,1.3e-05	Rask_block_401,1391,1404,9.4e-08	Rask_block_11,1405,1424,0.0034	Rask_block_3,1438,1455,0.00051	Rask_block_311,1456,1492,6.9e-28	Rask_block_327,1512,1532,2.5e-16	Rask_block_326,1541,1553,2e-10	Rask_block_2,1556,1570,2.3e-07	Rask_block_304,1572,1600,6.9e-22	Rask_block_1,1601,1626,1.4e-07	Rask_block_310,1627,1757,3.3e-83	Rask_block_76,1763,1799,1.6e-13	Rask_block_4,1800,1813,0.00051	Rask_block_404,1819,1826,0.061	Rask_block_11,1827,1847,3.6e-05	Rask_block_3,1855,1872,2.7e-05
S_L8_68_Contig3141_frame_-3	Rask_block_579,22,38,6.2e-10	Rask_block_1,39,64,1.1e-13	Rask_block_45,78,110,5.1e-10	Rask_block_18,122,141,2.4e-07	Rask_block_355,144,169,2.9e-16
NS_L7_27_Contig6888_frame_-3	Rask_block_10,1,26,0.00074	Rask_block_207,32,39,0.0009	Rask_block_31,44,66,2.2e-08	Rask_block_56,69,85,0.021	Rask_block_30,112,137,0.00079	Rask_block_21,139,164,6.6e-13	Rask_block_182,167,174,0.16
S_L8_68_Contig1970_frame_-2	Rask_block_19,23,56,1.2e-14	Rask_block_4,69,86,1.9e-08	Rask_block_13,95,116,0.00092	Rask_block_3,128,144,5e-08	Rask_block_171,145,155,2.7e-05	Rask_block_129,156,169,0.0018	Rask_block_161,185,192,0.0071	Rask_block_5,193,211,4e-10	Rask_block_36,215,240,6.4e-06	Rask_block_2,246,263,1e-12	Rask_block_130,264,277,2.9e-08	Rask_block_7,287,312,2.2e-08	Rask_block_1,314,339,3.4e-11
NS_L7_29_Contig3243_frame_1	Rask_block_23,3,25,0.00037	Rask_block_57,32,42,0.00046	Rask_block_8,61,94,9.1e-15	Rask_block_1,103,128,6.4e-12	Rask_block_32,137,173,1.4e-11	Rask_block_10,187,214,2.6e-07	Rask_block_101,219,243,1.5e-10	Rask_block_52,246,263,0.01	Rask_block_65,268,303,3.9e-18	Rask_block_53,313,332,2.3e-08	Rask_block_4,344,359,1.3e-07	Rask_block_13,385,406,3.5e-07	Rask_block_3,418,435,5e-10	Rask_block_174,436,446,0.0002	Rask_block_14,448,471,4.6e-06	Rask_block_5,482,500,1.6e-11	Rask_block_183,514,527,9.3e-10	Rask_block_2,528,545,1.1e-10	Rask_block_59,546,566,4.6e-06	Rask_block_1,580,605,4.4e-07	Rask_block_119,607,618,0.025	Rask_block_62,625,645,6.7e-07	Rask_block_209,649,670,1.8e-08	Rask_block_61,671,697,2.6e-13	Rask_block_18,702,721,2.2e-07	Rask_block_557,724,735,5.1e-05	Rask_block_15,736,759,2.3e-07	Rask_block_74,764,778,0.00047	Rask_block_4,781,798,3.5e-08	Rask_block_11,807,827,4e-10	Rask_block_16,833,848,0.002	Rask_block_3,849,866,1.5e-08	Rask_block_86,867,886,0.032	Rask_block_461,892,903,0.016	Rask_block_5,904,923,1.1e-10	Rask_block_133,924,949,8e-09	Rask_block_427,951,959,0.024	Rask_block_2,962,978,4.8e-11	Rask_block_48,979,999,3e-07	Rask_block_1,1008,1033,3.6e-08	Rask_block_45,1050,1081,2.1e-07	Rask_block_581,1082,1092,5.4e-05	Rask_block_18,1093,1112,2.2e-05	Rask_block_52,1120,1137,0.00016	Rask_block_315,1143,1207,2.8e-11	Rask_block_4,1213,1230,8.5e-08	Rask_block_13,1239,1259,8.8e-05	Rask_block_3,1271,1288,1.1e-09
NS_L6_18_Contig15989_frame_-1	Rask_block_4,2,18,2.5e-07	Rask_block_11,27,47,1.7e-10	Rask_block_77,48,65,1.1e-05	Rask_block_16,70,86,1.2e-06	Rask_block_3,87,104,3.4e-09	Rask_block_27,107,127,7e-05	Rask_block_5,136,155,2.1e-11	Rask_block_90,156,169,7.8e-05	Rask_block_96,174,194,4.7e-06	Rask_block_409,203,212,0.017	Rask_block_2,215,231,6.4e-08	Rask_block_12,233,250,4.3e-06	Rask_block_7,253,277,8e-09	Rask_block_1,280,296,8.1e-06
NS_L6_18_Contig15105_frame_2	Rask_block_27,6,28,6.5e-05	Rask_block_5,33,51,1.7e-11	Rask_block_55,55,73,0.0004	Rask_block_29,80,102,9.8e-08	Rask_block_105,108,118,3.5e-06	Rask_block_2,119,136,4.8e-09	Rask_block_12,137,155,6.2e-05	Rask_block_7,161,186,1.8e-10	Rask_block_1,188,213,3.6e-09	Rask_block_72,216,229,0.088	Rask_block_9,239,261,2.1e-07	Rask_block_6,271,296,1.1e-12	Rask_block_50,319,340,3.5e-07	Rask_block_22,343,365,3.2e-13	Rask_block_159,366,372,0.11
NS_L8_55_Contig5863_frm2_orf0	Rask_block_327,1,15,1e-09	Rask_block_326,24,36,4.7e-10	Rask_block_2,39,53,1.3e-07	Rask_block_304,55,83,2.4e-20	Rask_block_1,84,109,8.2e-08	Rask_block_310,110,240,1.5e-84	Rask_block_76,246,282,2.5e-13	Rask_block_4,283,296,0.00029	Rask_block_404,302,309,0.02	Rask_block_11,310,330,2.1e-05	Rask_block_586,332,339,0.25	Rask_block_3,346,363,1.6e-05	Rask_block_108,364,383,6.5e-08	Rask_block_5,395,413,1e-10	Rask_block_142,418,432,1.9e-07	Rask_block_2,433,450,5.1e-08	Rask_block_371,451,478,1.8e-16	Rask_block_1,481,504,0.025	Rask_block_97,522,540,3.1e-07	Rask_block_206,541,580,1.1e-19	Rask_block_76,590,623,2e-10	Rask_block_4,624,636,0.071	Rask_block_160,644,672,2.3e-18	Rask_block_3,680,695,2.4e-07	Rask_block_126,697,713,2.7e-07	Rask_block_5,722,741,6.2e-10	Rask_block_222,742,759,6.6e-11	Rask_block_2,762,777,5.6e-10	Rask_block_48,779,799,6.8e-06	Rask_block_1,807,832,6.1e-08	Rask_block_45,837,863,2.9e-09	Rask_block_78,868,889,1.4e-11	Rask_block_21,899,923,7.5e-11	Rask_block_41,925,975,9.5e-30	Rask_block_473,976,984,9.2e-05	Rask_block_43,987,1025,2e-25	Rask_block_25,1027,1046,2.9e-05	Rask_block_42,1048,1063,1.5e-08	Rask_block_39,1073,1104,5.3e-14	Rask_block_40,1123,1137,2.2e-08	Rask_block_38,1140,1197,2e-33	Rask_block_44,1200,1222,2.2e-06
NS_L7_29_Contig7950_frame_2	Rask_block_8,1,22,0.00027	Rask_block_1,31,55,1.7e-12	Rask_block_423,56,67,1.4e-06	Rask_block_24,68,108,1.4e-12	Rask_block_10,115,142,1.7e-10	Rask_block_195,145,156,0.00048	Rask_block_31,157,175,3.2e-05	Rask_block_56,179,193,3e-05	Rask_block_28,214,225,0.0019	Rask_block_21,237,261,2.1e-12	Rask_block_41,263,280,0.0015
S_L8_56_Contig1969_frm1_orf0	Rask_block_14,9,29,1.1e-05	Rask_block_64,31,43,2.5e-05	Rask_block_5,45,63,5.2e-12	Rask_block_36,67,94,9.9e-16	Rask_block_2,99,114,9e-11
NS_L1_95_Contig8060_frame_1	Rask_block_264,9,28,9.1e-07	Rask_block_20,30,49,0.0011	Rask_block_17,53,92,2.5e-12	Rask_block_19,100,127,1.6e-10	Rask_block_4,137,152,1.4e-08	Rask_block_13,163,184,6.6e-10	Rask_block_513,185,191,0.026	Rask_block_3,192,209,2e-07	Rask_block_219,210,220,2.1e-05	Rask_block_14,221,244,0.0002	Rask_block_179,247,255,0.00028	Rask_block_5,256,275,1.9e-08	Rask_block_60,285,310,1.1e-10	Rask_block_2,311,328,4.1e-11	Rask_block_12,329,345,0.00047	Rask_block_7,349,374,4.2e-10	Rask_block_1,376,401,1.7e-06	Rask_block_70,402,426,1.3e-07	Rask_block_9,427,453,3.4e-08	Rask_block_399,456,467,1.7e-05	Rask_block_6,471,491,2.9e-11	Rask_block_150,497,515,4.2e-07	Rask_block_23,517,540,1.4e-09	Rask_block_57,551,570,2.1e-08	Rask_block_8,581,614,7.8e-16	Rask_block_1,622,647,2.3e-09	Rask_block_121,652,691,1.1e-21	Rask_block_10,708,735,3.1e-07	Rask_block_141,736,753,2.5e-06	Rask_block_65,777,812,2.3e-15	Rask_block_53,825,843,0.0073	Rask_block_4,856,872,4e-07	Rask_block_189,873,886,0.0089	Rask_block_13,890,911,1.3e-07	Rask_block_234,913,931,5.9e-08	Rask_block_3,932,949,5e-09	Rask_block_457,950,961,3.8e-08	Rask_block_14,962,985,1.4e-06	Rask_block_5,996,1014,3.6e-10	Rask_block_605,1016,1028,5.1e-08	Rask_block_183,1029,1042,2.7e-10	Rask_block_2,1043,1060,1.1e-09	Rask_block_59,1061,1079,3e-09	Rask_block_604,1082,1095,8e-11	Rask_block_1,1096,1121,1.1e-06	Rask_block_62,1140,1161,0.00048	Rask_block_61,1182,1207,6.2e-10	Rask_block_18,1215,1234,7.8e-06	Rask_block_15,1251,1274,0.0001
S_L8_56_Contig4566_frame_1	Rask_block_194,58,67,0.32	Rask_block_20,76,98,6.1e-11	Rask_block_17,102,132,1.2e-05	Rask_block_19,136,170,1.4e-13	Rask_block_4,178,195,2.8e-05	Rask_block_13,205,226,2.6e-08	Rask_block_135,227,239,8.3e-07	Rask_block_3,241,257,8e-07	Rask_block_54,258,270,0.0044	Rask_block_14,271,293,7.7e-06	Rask_block_5,305,322,4e-11	Rask_block_36,328,356,3e-14	Rask_block_163,364,370,0.0088	Rask_block_2,371,388,1.6e-12	Rask_block_130,389,402,3.8e-10	Rask_block_7,412,437,5.2e-09	Rask_block_1,439,464,7.7e-10	Rask_block_34,477,495,0.00011	Rask_block_9,502,530,4.9e-11	Rask_block_75,532,543,0.0026	Rask_block_6,561,584,1.1e-13	Rask_block_23,609,632,1.4e-09	Rask_block_104,633,645,0.03	Rask_block_63,651,670,9.1e-10	Rask_block_67,686,698,9.1e-06	Rask_block_8,707,740,6e-17	Rask_block_441,741,751,3.8e-06	Rask_block_1,752,778,7.6e-10	Rask_block_32,793,833,1.6e-14	Rask_block_10,849,876,1.4e-07	Rask_block_26,903,916,1.6e-06	Rask_block_30,937,959,0.12	Rask_block_15,965,986,8e-07	Rask_block_35,992,1007,1.5e-06	Rask_block_4,1030,1047,1.1e-05	Rask_block_81,1059,1076,0.039	Rask_block_73,1081,1092,0.25	Rask_block_11,1099,1119,4.2e-10	Rask_block_16,1147,1164,5.5e-06	Rask_block_3,1165,1182,7.6e-09
NS_L7_27_Contig7038_frm-2_orf0	Rask_block_2,4,21,7.1e-13	Rask_block_7,42,67,2.5e-11	Rask_block_1,69,94,1.6e-07	Rask_block_70,95,119,8.1e-11	Rask_block_9,120,145,1.1e-07	Rask_block_399,148,159,0.00012	Rask_block_6,161,184,2.2e-11	Rask_block_150,189,205,3.3e-06	Rask_block_23,209,232,1e-06	Rask_block_57,240,260,2.4e-09	Rask_block_8,270,302,6.2e-12	Rask_block_1,312,335,2.6e-10	Rask_block_121,342,381,8.1e-21
NS_L8_65_Contig5579_frame_1	Rask_block_63,27,46,1.4e-10	Rask_block_67,66,76,0.00018	Rask_block_8,83,113,1.2e-13	Rask_block_1,125,150,6.9e-12	Rask_block_32,158,194,1.6e-11	Rask_block_10,209,234,9.8e-05	Rask_block_52,273,289,0.11	Rask_block_65,294,330,7.5e-16	Rask_block_53,338,357,1.4e-05	Rask_block_4,369,385,5.1e-08	Rask_block_13,403,424,2.5e-07	Rask_block_234,425,441,0.22	Rask_block_3,442,459,3.3e-10	Rask_block_14,472,494,0.0003	Rask_block_199,500,507,0.052	Rask_block_5,508,527,2e-11	Rask_block_2,541,558,2.2e-10	Rask_block_59,559,578,1e-07	Rask_block_1,591,612,6.7e-05	Rask_block_119,618,629,0.034	Rask_block_62,634,655,1.3e-08	Rask_block_209,657,676,4.4e-11	Rask_block_61,677,702,2.2e-14	Rask_block_18,708,725,1.4e-06	Rask_block_588,728,739,3.3e-05	Rask_block_15,740,765,2.8e-05	Rask_block_4,782,797,3.4e-07	Rask_block_11,808,828,1.4e-11	Rask_block_16,835,849,0.0036	Rask_block_3,850,867,2.9e-09	Rask_block_86,868,891,1.5e-07	Rask_block_5,902,921,6.8e-09	Rask_block_90,922,936,0.0026	Rask_block_167,943,958,0.0025	Rask_block_2,960,976,4.4e-10	Rask_block_59,977,992,8.5e-05	Rask_block_1,1011,1036,3.4e-08	Rask_block_129,1039,1070,3.2e-10	Rask_block_61,1073,1100,3e-11	Rask_block_18,1106,1124,5.6e-07	Rask_block_15,1133,1156,0.17	Rask_block_74,1163,1177,0.00037	Rask_block_4,1180,1196,1.9e-06	Rask_block_11,1206,1226,1.4e-12	Rask_block_406,1228,1238,1.8e-06	Rask_block_16,1249,1264,4.4e-06	Rask_block_3,1265,1282,2.1e-09	Rask_block_27,1289,1305,0.0004	Rask_block_5,1318,1337,3e-11
S_L7_42_Contig6295_frame_3	Rask_block_1,1,23,1.9e-06	Rask_block_62,41,62,2.6e-06	Rask_block_61,77,102,4.8e-13	Rask_block_18,108,125,0.00026	Rask_block_612,128,139,0.0056	Rask_block_15,142,166,1.4e-08	Rask_block_74,172,185,0.082	Rask_block_4,190,207,1.6e-06	Rask_block_11,217,237,1.6e-11	Rask_block_77,238,256,3.7e-05	Rask_block_16,268,284,0.00015	Rask_block_3,285,302,3.5e-09	Rask_block_27,316,335,0.00043	Rask_block_5,343,362,7.5e-11	Rask_block_55,363,382,0.0015	Rask_block_448,383,393,0.27	Rask_block_29,400,422,4.5e-05	Rask_block_2,430,446,4e-09	Rask_block_12,447,465,6.3e-05	Rask_block_7,469,494,4.4e-13	Rask_block_1,496,521,7.3e-09	Rask_block_122,522,537,7.9e-06	Rask_block_9,539,560,0.15	Rask_block_178,566,584,2.9e-09	Rask_block_6,585,608,1.8e-11	Rask_block_148,627,647,0.034	Rask_block_22,650,671,1.2e-09	Rask_block_522,673,687,4.7e-08	Rask_block_8,690,722,1.7e-09	Rask_block_1,724,747,2.6e-11	Rask_block_24,759,796,3.1e-08	Rask_block_10,811,837,1.3e-06	Rask_block_31,846,870,0.00024	Rask_block_15,883,907,6.2e-07	Rask_block_139,912,925,0.0024	Rask_block_4,927,941,6.2e-06	Rask_block_11,956,976,1.6e-09	Rask_block_16,982,997,0.00037	Rask_block_3,998,1014,2.2e-08	Rask_block_86,1016,1038,0.00034	Rask_block_5,1050,1069,6.5e-09	Rask_block_29,1082,1101,1.4e-05	Rask_block_2,1109,1125,2.2e-10	Rask_block_48,1126,1146,7.3e-05	Rask_block_1,1154,1179,1.9e-09	Rask_block_45,1195,1227,1.2e-10	Rask_block_18,1239,1258,6e-06	Rask_block_52,1266,1283,0.0031	Rask_block_123,1284,1304,1.2e-06
S_L7_42_Contig5303_frame_-1	Rask_block_10,3,28,2.7e-11	Rask_block_459,30,41,6.7e-06	Rask_block_56,68,87,4.4e-05	Rask_block_28,103,113,0.001	Rask_block_21,141,166,6.9e-14
NS_L1_88_49720_frame_-2	Rask_block_23,12,34,2.5e-09	Rask_block_104,37,48,0.23	Rask_block_63,55,73,3.2e-10	Rask_block_67,88,99,4.4e-06	Rask_block_354,102,112,8.8e-07	Rask_block_8,114,146,1.5e-15	Rask_block_1,158,177,3e-09
S_L3_13_Contig6981_frame_-1	Rask_block_48,7,23,0.0006	Rask_block_579,26,40,4.4e-05	Rask_block_1,43,68,2.6e-12	Rask_block_45,81,114,2.9e-12	Rask_block_18,125,144,1.2e-07	Rask_block_355,147,168,3.3e-12
NS_L7_19_Contig6754_frame_3	Rask_block_6,4,28,5.4e-13	Rask_block_226,29,38,0.00075	Rask_block_50,46,72,7.9e-12	Rask_block_22,75,97,2.9e-12	Rask_block_8,113,144,2.8e-16	Rask_block_1,155,180,3.1e-13	Rask_block_24,191,232,1.4e-19	Rask_block_10,239,265,1.5e-11	Rask_block_31,284,302,4.9e-05	Rask_block_56,306,324,1.6e-05	Rask_block_28,339,350,0.077	Rask_block_21,381,405,1.6e-11
NS_L6_20_Contig16267_frame_1	Rask_block_2,1,17,1.7e-11	Rask_block_130,18,31,3.5e-10	Rask_block_7,38,63,1e-09	Rask_block_1,65,90,1e-10	Rask_block_34,101,119,0.00013	Rask_block_9,123,151,2.2e-11	Rask_block_75,154,165,0.031	Rask_block_245,174,183,0.00037	Rask_block_6,187,210,5.5e-13	Rask_block_68,217,237,1.2e-06	Rask_block_23,238,261,1.3e-08	Rask_block_208,262,273,1.1e-05	Rask_block_63,290,309,1.9e-09	Rask_block_114,311,327,0.00015	Rask_block_67,329,340,5.9e-06	Rask_block_8,350,382,1.1e-18	Rask_block_1,393,419,6.4e-10	Rask_block_292,421,437,5.6e-06	Rask_block_32,439,482,3.8e-15	Rask_block_560,492,501,0.096	Rask_block_10,503,527,3.6e-07	Rask_block_26,556,567,0.00059	Rask_block_15,608,630,2e-06	Rask_block_35,636,651,1.2e-07
NS_L8_59_Contig5842_frame_3	Rask_block_4,1,18,8.4e-08	Rask_block_13,35,56,6.4e-07	Rask_block_234,58,76,0.018	Rask_block_3,77,94,9.6e-09	Rask_block_146,95,106,0.011	Rask_block_14,108,129,0.0011	Rask_block_5,137,155,7.5e-11	Rask_block_187,159,171,3.2e-05	Rask_block_2,172,182,0.0023	Rask_block_1,217,235,0.00023	Rask_block_62,259,281,4.2e-05	Rask_block_61,305,320,0.00096	Rask_block_26,365,380,7.4e-09	Rask_block_15,406,429,0.00011	Rask_block_74,433,447,0.0021	Rask_block_4,450,461,9.3e-05	Rask_block_11,479,499,3.8e-10	Rask_block_16,505,520,0.0011	Rask_block_3,521,537,8.8e-06	Rask_block_86,539,561,7.9e-05	Rask_block_5,574,593,1e-11	Rask_block_94,610,630,6.5e-06	Rask_block_2,632,648,5e-12	Rask_block_48,649,668,2.4e-06	Rask_block_1,678,703,6.8e-12	Rask_block_45,720,752,1.6e-10
S_L7_16_26954_frame_-1	Rask_block_19,1,33,1.9e-10	Rask_block_4,38,54,5e-05	Rask_block_13,65,86,1e-10	Rask_block_102,87,98,4.4e-05	Rask_block_3,105,121,3.9e-07	Rask_block_524,125,134,6.7e-05	Rask_block_14,136,158,3.1e-06	Rask_block_5,168,185,2.5e-10	Rask_block_36,193,219,8e-11	Rask_block_153,221,227,0.0021	Rask_block_2,228,245,9.3e-13	Rask_block_130,246,259,8.7e-11	Rask_block_7,266,291,2.5e-11	Rask_block_1,293,318,1.3e-08
NS_L7_29_31289_frame_-3	Rask_block_1,14,39,0.0031	Rask_block_119,40,52,0.0058	Rask_block_62,61,80,7.6e-06	Rask_block_255,86,108,2.1e-12	Rask_block_61,117,143,7.9e-11	Rask_block_18,147,166,4.2e-05	Rask_block_101,174,191,0.0005	Rask_block_52,196,213,0.00019	Rask_block_65,221,255,3.2e-17	Rask_block_53,263,282,1.5e-07	Rask_block_4,292,309,3.8e-09	Rask_block_584,310,326,7.9e-10	Rask_block_13,327,348,1.6e-09	Rask_block_3,364,380,1.1e-06	Rask_block_174,381,390,0.00012	Rask_block_14,397,416,0.00023	Rask_block_5,426,443,6.6e-12	Rask_block_2,460,477,5.1e-11	Rask_block_59,478,496,1.1e-06	Rask_block_250,500,508,0.028	Rask_block_1,510,535,2.2e-08	Rask_block_129,538,569,1.8e-05	Rask_block_61,574,598,3.3e-14	Rask_block_18,605,624,7.7e-07
NS_L1_88_54374_frame_-1	Rask_block_2,1,14,3.5e-07	Rask_block_59,15,35,1.2e-07	Rask_block_1,48,73,8.7e-07	Rask_block_62,91,109,2.9e-05	Rask_block_61,122,147,1.5e-11	Rask_block_18,163,182,1.4e-07	Rask_block_52,232,248,0.0017	Rask_block_65,253,286,0.00012	Rask_block_53,297,316,0.088	Rask_block_4,325,342,1.1e-06	Rask_block_278,347,354,0.032	Rask_block_13,355,376,1.1e-08	Rask_block_3,386,402,1.4e-08	Rask_block_146,403,412,0.016	Rask_block_14,415,434,0.0088	Rask_block_436,438,448,0.00012	Rask_block_5,449,468,3.3e-11	Rask_block_400,469,489,2.6e-09	Rask_block_2,490,507,4.5e-11	Rask_block_59,508,528,2.3e-06	Rask_block_1,540,565,1.6e-06	Rask_block_62,583,600,3.1e-06	Rask_block_209,603,622,1.8e-06	Rask_block_61,623,648,3.3e-15	Rask_block_18,655,674,1.2e-07	Rask_block_426,680,697,0.00042	Rask_block_26,710,725,0.0013	Rask_block_593,738,751,0.19	Rask_block_30,766,788,0.026	Rask_block_15,795,817,9.8e-09	Rask_block_35,821,835,7e-05	Rask_block_4,843,860,1.2e-05	Rask_block_81,871,889,0.19	Rask_block_11,898,918,2.5e-10	Rask_block_77,919,936,7.7e-05	Rask_block_16,942,958,2.6e-05	Rask_block_3,959,976,1.1e-08	Rask_block_82,979,1000,0.018	Rask_block_5,1018,1037,1e-10	Rask_block_55,1043,1061,0.001	Rask_block_29,1074,1093,2.2e-05	Rask_block_105,1112,1122,0.00026	Rask_block_2,1123,1140,2.7e-07	Rask_block_12,1141,1159,8.9e-05	Rask_block_7,1160,1185,1.4e-06	Rask_block_1,1187,1212,1e-08	Rask_block_72,1220,1236,8.1e-05	Rask_block_9,1242,1265,9.2e-07	Rask_block_6,1282,1306,9.8e-11
S_L3_13_Contig7200_frame_1	Rask_block_1,17,30,0.046	Rask_block_9,49,72,0.012	Rask_block_298,74,85,0.002	Rask_block_6,87,110,9.7e-13	Rask_block_50,131,158,9.2e-11	Rask_block_22,161,182,2.8e-12	Rask_block_276,184,195,0.027	Rask_block_8,199,232,1.1e-15	Rask_block_1,240,260,5e-07	Rask_block_24,272,313,2.6e-17	Rask_block_10,320,345,2.6e-11	Rask_block_31,359,382,0.00046	Rask_block_56,386,401,0.051	Rask_block_30,404,424,0.057	Rask_block_33,432,447,0.16	Rask_block_21,455,480,3.9e-09
NS_L1_95_Contig9067_frame_-1	Rask_block_9,2,18,0.00089	Rask_block_458,22,31,2.1e-06	Rask_block_6,35,54,2.2e-10	Rask_block_103,67,81,0.00077	Rask_block_85,85,104,1.3e-11	Rask_block_22,115,136,4.4e-10	Rask_block_83,140,152,2.9e-05	Rask_block_8,154,179,1.6e-10
S_L3_13_Contig7235_frame_3	Rask_block_16,9,21,0.0012	Rask_block_3,22,38,6.2e-07	Rask_block_86,40,60,3.1e-05	Rask_block_5,71,90,3.7e-09	Rask_block_29,97,120,1.1e-07	Rask_block_2,125,141,1.4e-10	Rask_block_48,142,160,2.8e-05	Rask_block_1,169,194,1e-08	Rask_block_45,207,239,7.2e-11	Rask_block_18,258,277,1.3e-06	Rask_block_318,285,366,1.1e-37	Rask_block_4,378,395,5.2e-06	Rask_block_13,403,424,1.8e-06	Rask_block_3,436,453,3.8e-09	Rask_block_14,463,485,2e-05	Rask_block_5,497,514,8.3e-11	Rask_block_92,537,549,1e-06	Rask_block_2,550,567,1e-08	Rask_block_403,568,597,2e-20	Rask_block_1,600,625,7.5e-08	Rask_block_115,643,657,0.00017	Rask_block_93,664,680,8.9e-05	Rask_block_18,686,705,1.6e-07	Rask_block_407,706,718,6.3e-05	Rask_block_76,722,755,2.3e-07	Rask_block_4,757,769,0.00036	Rask_block_11,784,804,0.041	Rask_block_3,812,827,1.4e-08	Rask_block_5,861,880,1.3e-09	Rask_block_293,885,897,2e-06	Rask_block_2,901,915,1.6e-09	Rask_block_48,916,936,0.00076	Rask_block_1,945,970,1.4e-07	Rask_block_45,978,1002,0.00031	Rask_block_78,1008,1029,1.5e-13	Rask_block_21,1043,1068,1e-11
S_L7_20_Contig341_frame_1	Rask_block_5,4,21,5.5e-11	Rask_block_589,31,43,8.9e-07	Rask_block_2,44,61,1.2e-10	Rask_block_59,62,82,3.8e-06	Rask_block_1,95,120,1.1e-08	Rask_block_62,138,157,2.7e-05	Rask_block_396,158,173,3.1e-08	Rask_block_61,176,201,4e-14	Rask_block_18,206,225,3.5e-07	Rask_block_15,245,268,3e-08	Rask_block_286,271,280,0.00027	Rask_block_4,286,302,5.2e-07	Rask_block_11,313,331,6.6e-08	Rask_block_16,336,350,0.00051	Rask_block_3,351,368,3.2e-09	Rask_block_82,371,393,2.3e-05	Rask_block_5,409,426,1e-08	Rask_block_133,427,452,0.0012	Rask_block_427,453,462,0.00036	Rask_block_2,464,480,7.9e-11	Rask_block_136,481,503,9.3e-05	Rask_block_1,508,533,1.1e-10	Rask_block_45,556,577,4.3e-08	Rask_block_257,582,605,1.9e-10	Rask_block_28,614,624,0.059	Rask_block_49,638,657,0.0031	Rask_block_30,702,725,0.34	Rask_block_530,732,740,0.019	Rask_block_15,742,763,0.013	Rask_block_35,766,782,9.9e-07	Rask_block_4,805,818,5.6e-05	Rask_block_11,832,852,1.3e-10	Rask_block_273,853,870,1e-09	Rask_block_16,886,899,0.0012	Rask_block_3,901,916,2.6e-07	Rask_block_437,926,936,3.7e-05	Rask_block_177,938,947,0.002	Rask_block_27,950,969,4e-06	Rask_block_5,984,1002,2.2e-10	Rask_block_55,1008,1026,0.00043	Rask_block_29,1042,1063,3.4e-08	Rask_block_87,1071,1085,4.9e-07	Rask_block_2,1087,1103,1.4e-07	Rask_block_12,1104,1121,0.0033	Rask_block_7,1123,1147,0.00024	Rask_block_1,1149,1174,1.4e-08	Rask_block_9,1193,1216,2.7e-05	Rask_block_6,1227,1250,5.9e-11	Rask_block_180,1253,1267,0.0003
S_L3_13_Contig6318_frm1_orf43	Rask_block_1,7,32,7.6e-08	Rask_block_45,48,81,1.3e-10	Rask_block_18,103,120,0.0028	Rask_block_28,121,131,0.0023	Rask_block_28,164,175,0.00036	Rask_block_49,182,199,0.087	Rask_block_134,239,246,0.28	Rask_block_110,261,263,0.19	Rask_block_26,264,269,3.2e-06	Rask_block_26,285,297,0.024	Rask_block_205,300,307,0.12	Rask_block_95,311,330,0.0057
NS_L7_29_Contig7294_frame_-2	Rask_block_34,27,45,1.4e-05	Rask_block_9,49,76,8.1e-09	Rask_block_75,79,94,1.8e-05	Rask_block_6,121,145,4.2e-13	Rask_block_68,149,167,1.7e-07	Rask_block_23,170,191,4.1e-08	Rask_block_63,213,233,2e-10	Rask_block_110,240,254,4.1e-05	Rask_block_67,255,267,3.2e-05	Rask_block_354,275,282,0.079	Rask_block_8,285,318,5.6e-16	Rask_block_1,327,352,4.5e-09	Rask_block_32,364,411,2e-07	Rask_block_168,412,424,0.022	Rask_block_611,426,438,0.00044	Rask_block_10,439,466,1.6e-05	Rask_block_101,467,490,2.2e-08	Rask_block_52,495,512,0.0048	Rask_block_65,517,551,1.4e-14	Rask_block_375,552,561,0.009	Rask_block_53,562,581,7.4e-07	Rask_block_4,593,609,1.1e-07	Rask_block_515,610,621,0.016	Rask_block_13,623,643,3.4e-06	Rask_block_234,645,660,5.3e-05	Rask_block_3,661,678,3e-08	Rask_block_146,679,689,0.0014	Rask_block_14,691,713,8.1e-06	Rask_block_5,726,745,5.6e-11	Rask_block_231,751,760,1.4e-05	Rask_block_2,761,778,1.9e-10	Rask_block_59,779,799,1.6e-06	Rask_block_1,811,836,7.1e-09	Rask_block_62,854,877,4.2e-09	Rask_block_61,892,917,1.2e-15	Rask_block_18,921,940,2.2e-07	Rask_block_15,957,981,0.0013	Rask_block_139,987,1000,0.049	Rask_block_4,1002,1017,9.4e-07	Rask_block_11,1031,1051,1.3e-09	Rask_block_16,1054,1069,0.0023	Rask_block_3,1070,1086,3.8e-08	Rask_block_86,1088,1110,4.2e-05	Rask_block_5,1123,1142,2.9e-09	Rask_block_468,1143,1155,4.2e-07	Rask_block_29,1157,1173,0.0031	Rask_block_2,1182,1199,1.7e-09	Rask_block_48,1200,1220,8.5e-06	Rask_block_1,1228,1253,9.5e-09
S_L8_56_Contig2636_frame_-1	Rask_block_138,12,26,1.4e-05	Rask_block_50,30,57,3.7e-11	Rask_block_22,60,82,8.3e-12	Rask_block_287,85,98,8e-07	Rask_block_8,100,133,6.7e-18	Rask_block_1,144,169,2.1e-13	Rask_block_24,181,221,1.3e-20	Rask_block_10,228,253,2e-11	Rask_block_31,267,288,3.7e-06	Rask_block_56,290,304,0.055	Rask_block_221,310,332,1.9e-13	Rask_block_33,335,355,0.00081	Rask_block_21,364,388,1.3e-11
NS_L7_29_Contig2112_frm1_orf0	Rask_block_65,17,47,1.8e-11	Rask_block_53,64,84,0.037	Rask_block_4,95,112,8.8e-09	Rask_block_13,126,147,1.3e-09	Rask_block_3,156,173,4.9e-11	Rask_block_544,174,182,0.019	Rask_block_14,186,194,0.2
NS_L1_84_31566_frame_-2	Rask_block_2,1,14,4.3e-08	Rask_block_12,15,34,1.6e-07	Rask_block_7,35,60,8.9e-11	Rask_block_1,62,87,1.1e-10	Rask_block_70,89,117,8.3e-07	Rask_block_9,118,144,6.7e-09	Rask_block_6,161,183,1.3e-11	Rask_block_23,208,228,0.0045	Rask_block_57,242,258,0.00014	Rask_block_116,265,275,0.026	Rask_block_8,280,312,8.6e-13	Rask_block_1,321,346,4.7e-14	Rask_block_32,358,395,1.4e-09	Rask_block_10,408,435,0.00042	Rask_block_26,470,482,9.8e-06	Rask_block_30,508,534,0.031	Rask_block_35,558,574,1.3e-06	Rask_block_4,623,637,7.3e-06	Rask_block_11,662,682,2.9e-11	Rask_block_16,710,726,2.4e-05	Rask_block_3,727,744,2.6e-09	Rask_block_185,745,757,0.012	Rask_block_82,760,779,0.00016	Rask_block_5,794,813,4.7e-11	Rask_block_55,814,832,0.0022	Rask_block_29,846,868,8e-07	Rask_block_87,876,889,0.11	Rask_block_2,890,907,5.4e-08	Rask_block_12,908,927,2e-05	Rask_block_7,930,955,8.8e-10	Rask_block_1,957,982,2.3e-10	Rask_block_122,983,994,0.0065	Rask_block_9,1000,1022,0.00021	Rask_block_178,1025,1043,0.043	Rask_block_6,1046,1068,5.7e-12	Rask_block_477,1070,1090,0.2	Rask_block_85,1092,1111,6e-05	Rask_block_22,1118,1140,0.00014	Rask_block_8,1163,1195,2.2e-09	Rask_block_1,1197,1220,0.0002	Rask_block_24,1232,1273,2.1e-15	Rask_block_10,1284,1308,3.3e-10	Rask_block_271,1315,1324,2.7e-05	Rask_block_56,1345,1362,0.36	Rask_block_21,1410,1424,0.0011
NS_L1_80_Contig33359_frame_1	Rask_block_30,2,17,0.2	Rask_block_15,18,40,1.4e-06	Rask_block_35,43,58,0.00014	Rask_block_4,82,99,1.2e-05	Rask_block_106,107,120,0.096	Rask_block_11,123,143,5.7e-12	Rask_block_77,144,159,7.7e-06	Rask_block_16,173,189,7.4e-06	Rask_block_3,190,207,2.9e-08	Rask_block_359,213,222,0.004	Rask_block_27,225,245,0.0054	Rask_block_5,259,277,6.5e-07	Rask_block_55,283,301,4.1e-07	Rask_block_29,306,323,6e-05
NS_L7_29_31331_frame_2	Rask_block_86,1,18,0.00017	Rask_block_624,19,31,5.7e-09	Rask_block_5,32,51,5.2e-10	Rask_block_90,52,65,0.0025	Rask_block_96,70,90,8.2e-05	Rask_block_2,98,114,1e-10	Rask_block_136,115,140,1.3e-05	Rask_block_1,147,172,8.3e-09	Rask_block_45,183,210,1.7e-09	Rask_block_78,215,236,1.7e-08	Rask_block_15,240,263,1.1e-05	Rask_block_585,269,286,0.27	Rask_block_4,287,304,1.4e-06	Rask_block_11,315,334,3.6e-10	Rask_block_77,335,347,0.0028	Rask_block_3,370,387,1.6e-10	Rask_block_98,388,406,0.00032	Rask_block_5,417,435,6.5e-09	Rask_block_90,436,450,9e-05	Rask_block_96,454,471,6.7e-05	Rask_block_2,478,493,4.2e-09	Rask_block_12,495,514,7.5e-06	Rask_block_7,516,540,7.7e-08	Rask_block_1,542,567,6.4e-09	Rask_block_9,591,609,0.00035	Rask_block_6,622,645,8.8e-12	Rask_block_50,673,691,0.0022
NS_L1_95_Contig9209_frame_-1	Rask_block_20,25,46,3.3e-10	Rask_block_17,51,80,1.6e-06	Rask_block_19,84,115,4.3e-11	Rask_block_4,119,136,9.4e-08	Rask_block_13,148,168,2.7e-09	Rask_block_135,170,181,1.2e-06	Rask_block_3,186,202,4e-07	Rask_block_79,203,218,1.4e-05	Rask_block_14,219,240,2.5e-06	Rask_block_64,243,256,2.3e-05	Rask_block_5,258,276,2.3e-11	Rask_block_36,280,305,1.3e-11	Rask_block_88,314,320,0.0018	Rask_block_2,321,334,3.2e-08
S_L8_56_Contig6225_frame_-2	Rask_block_8,8,41,2.3e-16	Rask_block_472,44,51,7e-05	Rask_block_1,54,79,1.5e-13	Rask_block_32,97,134,4.7e-16	Rask_block_10,165,191,3.9e-06	Rask_block_49,194,208,0.16	Rask_block_26,226,241,7e-05	Rask_block_15,275,297,1.8e-06	Rask_block_35,302,317,1.9e-07	Rask_block_34,321,337,0.0076	Rask_block_4,344,361,4e-06
S_L7_20_Contig6477_frame_-2	Rask_block_8,7,40,2.7e-18	Rask_block_1,49,74,2.7e-14	Rask_block_24,85,126,1.2e-15	Rask_block_10,134,159,7.8e-10	Rask_block_31,183,198,0.0017	Rask_block_56,202,219,3.8e-05	Rask_block_33,242,261,0.0058	Rask_block_21,269,290,1.1e-09
S_L7_20_Contig5289_frame_-1	Rask_block_10,18,45,5.2e-09	Rask_block_26,74,87,4.2e-06	Rask_block_15,121,143,2e-08	Rask_block_35,149,165,8.5e-08	Rask_block_4,170,186,2.1e-06	Rask_block_106,224,238,0.00049
S_L7_20_Contig6418_frame_1	Rask_block_1,6,31,4e-11	Rask_block_24,43,84,1.3e-18	Rask_block_10,91,117,5.2e-13	Rask_block_195,119,129,0.15	Rask_block_31,135,159,6.6e-05	Rask_block_127,164,188,5.1e-09	Rask_block_21,213,229,5.2e-06
S_L7_42_Contig6172_frame_3	Rask_block_22,1,13,0.00037	Rask_block_107,15,27,2.9e-07	Rask_block_8,36,68,1.6e-17	Rask_block_1,77,102,2.2e-11	Rask_block_24,114,155,4.2e-18	Rask_block_10,166,192,1.1e-08	Rask_block_224,195,205,0.0018	Rask_block_31,210,223,1.6e-05
NS_L1_95_Contig3467_frame_3	Rask_block_72,13,26,0.017	Rask_block_9,29,52,0.00033	Rask_block_244,58,70,3.9e-07	Rask_block_6,71,95,1.4e-11	Rask_block_180,97,110,0.0037	Rask_block_50,117,146,5.4e-11	Rask_block_22,149,171,5.9e-14	Rask_block_107,173,187,3.5e-08	Rask_block_8,188,221,1.8e-18	Rask_block_1,235,255,1.2e-09	Rask_block_24,268,308,2e-18	Rask_block_10,317,339,6.2e-10
NS_L8_55_Contig5862_frame_-3	Rask_block_19,14,45,4.6e-09	Rask_block_4,51,68,6e-07	Rask_block_13,80,101,6.7e-10	Rask_block_3,114,130,5.1e-06	Rask_block_79,131,146,2.7e-07	Rask_block_14,147,169,6.2e-08	Rask_block_64,173,184,0.0079	Rask_block_5,188,206,1.4e-09	Rask_block_36,209,240,1e-13	Rask_block_153,249,255,0.0088	Rask_block_2,256,273,4.1e-12	Rask_block_12,275,293,1.7e-07	Rask_block_7,295,319,1.2e-08	Rask_block_1,322,347,3e-08	Rask_block_239,348,357,3.8e-05	Rask_block_34,360,376,0.00015	Rask_block_9,380,408,1.8e-11	Rask_block_75,412,428,4.3e-06	Rask_block_6,435,460,2.6e-11	Rask_block_23,482,505,2.7e-08	Rask_block_57,520,540,4.8e-07	Rask_block_626,541,549,0.0039	Rask_block_8,553,586,1e-15	Rask_block_1,595,619,9.5e-10	Rask_block_32,632,668,7.7e-08	Rask_block_10,681,708,5.1e-05	Rask_block_26,737,747,0.00096	Rask_block_15,772,794,3.2e-06	Rask_block_35,798,814,0.00011	Rask_block_132,821,844,4.1e-06	Rask_block_4,846,862,3.2e-05	Rask_block_517,892,903,8.1e-07	Rask_block_11,904,924,4.7e-10	Rask_block_77,925,942,0.0015	Rask_block_16,944,959,0.0032	Rask_block_3,961,978,2.7e-08	Rask_block_228,979,990,4.5e-05	Rask_block_27,992,1011,7.8e-06	Rask_block_398,1015,1023,0.005	Rask_block_5,1027,1046,3.5e-11	Rask_block_55,1053,1070,0.0012	Rask_block_29,1090,1112,9.6e-05	Rask_block_2,1120,1137,2.6e-10	Rask_block_12,1138,1157,1.9e-06	Rask_block_7,1159,1178,0.00076
NS_L6_18_Contig7103_frame_2	Rask_block_130,7,20,4.6e-09	Rask_block_7,28,53,7.8e-09	Rask_block_1,55,80,2e-10	Rask_block_9,106,132,5.4e-13	Rask_block_6,149,171,1.4e-12	Rask_block_23,196,213,0.002
NS_L7_29_Contig2112_frm3_orf51	Rask_block_5,1,15,7.7e-05	Rask_block_2,32,48,1.1e-08	Rask_block_200,50,110,4.6e-07	Rask_block_97,135,152,4.9e-05
NS_L1_84_Contig7915_frame_3	Rask_block_14,5,25,3.5e-10	Rask_block_64,29,41,0.00025	Rask_block_5,43,61,5.1e-10	Rask_block_36,66,90,5.6e-12	Rask_block_153,99,105,0.001	Rask_block_2,106,123,9e-13	Rask_block_12,125,142,1.9e-06	Rask_block_7,145,169,7.7e-12
NS_L8_59_Contig6434_frame_-3	Rask_block_88,1,7,0.012	Rask_block_2,8,25,6.7e-12	Rask_block_12,26,45,4.8e-07	Rask_block_7,49,74,8.9e-12	Rask_block_1,76,101,5.7e-08	Rask_block_70,102,126,5.4e-06	Rask_block_9,127,153,7.1e-10	Rask_block_268,154,165,0.0061	Rask_block_6,171,187,2e-07	Rask_block_23,220,240,2.2e-05	Rask_block_391,242,248,0.26	Rask_block_63,252,271,3.6e-11	Rask_block_8,289,322,6.3e-15	Rask_block_1,331,356,6.1e-14	Rask_block_32,371,407,2.1e-09	Rask_block_10,421,448,8.5e-08	Rask_block_26,474,488,2.9e-06	Rask_block_15,490,512,1.4e-06	Rask_block_139,521,534,1.4e-05	Rask_block_4,536,553,1.5e-09	Rask_block_11,562,582,1.1e-11	Rask_block_16,585,599,0.023	Rask_block_3,602,618,4.3e-07	Rask_block_86,620,642,8.9e-05	Rask_block_5,655,674,2.1e-07	Rask_block_29,681,702,0.00012	Rask_block_2,710,726,4.5e-11	Rask_block_59,727,747,3.3e-08	Rask_block_382,750,759,0.00036	Rask_block_1,760,785,1.5e-07	Rask_block_62,803,826,1.6e-08	Rask_block_209,827,846,1.8e-10	Rask_block_61,849,875,5.6e-14	Rask_block_18,879,896,5.7e-07	Rask_block_15,925,945,0.0003	Rask_block_35,951,966,4.7e-06	Rask_block_4,1005,1022,4.5e-06	Rask_block_11,1048,1068,1.6e-10	Rask_block_273,1069,1087,4.6e-11	Rask_block_16,1096,1111,0.00028	Rask_block_3,1112,1129,5.7e-08	Rask_block_27,1145,1163,0.0011	Rask_block_5,1175,1194,3.4e-10	Rask_block_55,1200,1218,3.9e-05	Rask_block_29,1222,1239,0.011	Rask_block_105,1248,1258,0.0002	Rask_block_2,1259,1276,9e-08	Rask_block_12,1277,1294,0.00042	Rask_block_7,1300,1324,1.1e-07
NS_L6_20_52605_frame_-2	Rask_block_20,19,41,4.8e-10	Rask_block_17,44,74,5e-09	Rask_block_19,80,115,3.9e-13	Rask_block_4,121,138,8.6e-08	Rask_block_13,150,169,9.2e-10	Rask_block_3,186,202,1.2e-06	Rask_block_79,203,218,6.6e-09	Rask_block_14,219,237,3.2e-06	Rask_block_210,248,260,2.3e-06	Rask_block_5,261,279,1.5e-08	Rask_block_36,282,313,7e-16	Rask_block_88,318,324,0.0018	Rask_block_2,325,341,5.5e-12
NS_L1_95_Contig3046_frame_-3	Rask_block_436,10,20,6.7e-06	Rask_block_5,21,40,2e-12	Rask_block_231,47,56,4.7e-07	Rask_block_2,57,74,2e-11	Rask_block_59,75,95,6e-08	Rask_block_250,99,108,0.00057	Rask_block_1,109,134,2.8e-08	Rask_block_119,135,147,0.00046	Rask_block_62,151,171,6.9e-07	Rask_block_61,184,197,5e-06
NS_L7_29_Contig7159_frame_2	Rask_block_2,5,22,1.2e-12	Rask_block_130,23,36,1.1e-10	Rask_block_7,46,71,1.2e-11	Rask_block_1,73,98,2e-10	Rask_block_34,110,128,1.5e-05	Rask_block_9,135,161,2.3e-10	Rask_block_75,165,181,1.1e-06	Rask_block_542,183,192,0.00013	Rask_block_6,208,232,8.5e-14	Rask_block_68,235,255,4.3e-08	Rask_block_23,258,279,2.2e-09	Rask_block_104,280,292,0.0021	Rask_block_63,297,317,2.6e-10	Rask_block_114,318,335,4.5e-06	Rask_block_67,337,348,6.9e-06	Rask_block_8,354,388,2e-18
S_L7_42_Contig1427_frame_-2	Rask_block_35,14,28,1.1e-05	Rask_block_4,35,52,1e-05	Rask_block_81,56,70,0.015	Rask_block_11,71,91,7.9e-11	Rask_block_273,92,103,7.7e-05	Rask_block_16,120,135,4.9e-06	Rask_block_3,136,153,2e-06	Rask_block_5,199,218,1.6e-11	Rask_block_55,224,240,0.00016	Rask_block_29,264,285,8.2e-09	Rask_block_105,298,308,1e-05	Rask_block_2,310,325,5e-07	Rask_block_12,328,344,0.00064	Rask_block_7,347,371,9.8e-09	Rask_block_1,373,398,9.9e-08	Rask_block_9,421,442,0.011	Rask_block_6,453,478,2e-12	Rask_block_138,479,493,5.2e-07	Rask_block_50,497,524,3.1e-09	Rask_block_22,528,550,3.1e-13	Rask_block_159,551,561,2.4e-05	Rask_block_8,575,608,6.5e-19	Rask_block_1,619,644,2e-12	Rask_block_24,656,697,1.4e-14	Rask_block_10,708,734,1.7e-08	Rask_block_31,747,771,2.4e-07	Rask_block_56,773,793,0.033	Rask_block_254,818,838,0.079	Rask_block_33,856,873,0.0098	Rask_block_21,882,907,1.1e-07	Rask_block_41,909,959,1.5e-27	Rask_block_43,966,1007,9.7e-28	Rask_block_25,1011,1030,4.9e-06	Rask_block_42,1033,1048,7.2e-09	Rask_block_164,1049,1057,4.1e-05	Rask_block_84,1058,1070,9.2e-06	Rask_block_39,1074,1102,1e-14	Rask_block_117,1105,1125,7.1e-10	Rask_block_40,1134,1148,6.9e-08	Rask_block_38,1149,1207,2.6e-36	Rask_block_44,1209,1231,3.9e-12	Rask_block_25,1235,1256,0.00021	Rask_block_203,1257,1266,2.5e-06	Rask_block_46,1268,1294,2.3e-15	Rask_block_47,1311,1335,1.2e-08	Rask_block_51,1339,1350,8.5e-05
S_L6_19_65316_frame_2	Rask_block_13,9,30,2e-10	Rask_block_3,45,62,6.4e-11	Rask_block_544,63,73,2.1e-06	Rask_block_14,75,97,1.7e-07	Rask_block_5,109,127,4.2e-11	Rask_block_259,134,148,7.1e-09	Rask_block_2,149,166,1.7e-11	Rask_block_59,167,187,1.3e-07	Rask_block_1,201,226,7.9e-08	Rask_block_119,228,239,0.11	Rask_block_62,243,262,1.7e-05	Rask_block_61,274,300,7.1e-15	Rask_block_18,304,321,2.9e-09	Rask_block_557,326,338,7e-06	Rask_block_15,339,363,5.7e-09	Rask_block_139,367,381,0.00013	Rask_block_4,383,399,5.7e-07	Rask_block_11,410,429,1.1e-07	Rask_block_16,435,447,0.016	Rask_block_3,448,465,1.6e-10	Rask_block_82,468,489,6.6e-08	Rask_block_5,496,513,1.3e-06	Rask_block_29,522,541,4e-05	Rask_block_2,551,567,9.6e-12	Rask_block_48,568,584,8.9e-05	Rask_block_1,601,626,3.2e-07	Rask_block_45,639,678,6.5e-09	Rask_block_18,683,700,2.8e-05
NS_L8_51_Contig6948_frame_-2	Rask_block_20,66,86,5.3e-09	Rask_block_17,90,124,5.6e-13	Rask_block_19,129,161,7.2e-16	Rask_block_4,168,183,1.6e-06	Rask_block_13,193,213,1.2e-08	Rask_block_3,228,245,4.5e-07	Rask_block_79,246,258,1.2e-05	Rask_block_14,259,277,1.7e-06	Rask_block_64,280,295,0.0098	Rask_block_5,297,316,3.7e-10	Rask_block_36,318,344,6.2e-13	Rask_block_2,349,366,1.5e-12	Rask_block_130,367,380,9.5e-09	Rask_block_7,387,412,7.5e-11	Rask_block_1,414,438,1.5e-09	Rask_block_34,443,461,6.6e-06
NS_L1_80_102341_frame_-3	Rask_block_20,34,55,3.3e-08	Rask_block_17,60,93,4.4e-11	Rask_block_19,95,128,3.3e-13	Rask_block_4,135,152,1.5e-07	Rask_block_13,161,182,2.2e-09	Rask_block_188,183,195,0.00013	Rask_block_3,197,213,3.9e-07	Rask_block_54,214,228,0.00011	Rask_block_14,229,249,1.7e-06	Rask_block_161,254,263,0.0003	Rask_block_5,264,282,4e-10	Rask_block_36,285,311,7.1e-11	Rask_block_2,316,331,1.3e-10
S_L7_42_Contig6285_frame_3	Rask_block_2,7,24,3.5e-11	Rask_block_59,25,45,5e-09	Rask_block_250,49,57,0.03	Rask_block_1,59,84,6.1e-11	Rask_block_62,97,120,6.5e-07	Rask_block_255,121,136,0.0011	Rask_block_61,139,165,2.6e-13	Rask_block_18,172,187,0.00051	Rask_block_49,199,213,0.089	Rask_block_26,222,235,2.9e-06	Rask_block_537,254,263,1.4e-05	Rask_block_261,264,300,8.7e-18	Rask_block_4,301,318,0.0099	Rask_block_11,331,350,3.1e-06	Rask_block_383,353,367,0.054	Rask_block_3,374,389,6.5e-06	Rask_block_265,391,419,2.1e-09	Rask_block_5,429,448,1.4e-07	Rask_block_415,449,471,3.1e-11	Rask_block_2,472,489,1.4e-08	Rask_block_48,490,509,6.3e-05	Rask_block_45,552,575,4e-06	Rask_block_363,581,599,3.3e-10	Rask_block_76,622,657,2.8e-08	Rask_block_4,658,672,0.015	Rask_block_11,685,704,0.033	Rask_block_3,714,728,4e-07	Rask_block_5,761,779,5.6e-09	Rask_block_293,785,796,7.7e-06	Rask_block_2,797,814,2.2e-07	Rask_block_200,815,867,6.2e-21	Rask_block_97,876,893,9.6e-08	Rask_block_206,894,934,4e-21	Rask_block_465,935,943,0.00021	Rask_block_76,946,979,8.6e-12	Rask_block_4,980,993,0.00015	Rask_block_160,1006,1027,6e-07	Rask_block_3,1034,1050,2e-07	Rask_block_126,1052,1059,0.21	Rask_block_5,1076,1095,1.9e-10	Rask_block_222,1096,1113,1.4e-12	Rask_block_2,1116,1131,1.8e-09	Rask_block_48,1133,1153,1.6e-06	Rask_block_1,1162,1187,4.8e-09	Rask_block_414,1188,1213,1.6e-18	Rask_block_78,1217,1238,1.1e-07	Rask_block_95,1269,1284,0.24	Rask_block_21,1287,1312,1.3e-10	Rask_block_41,1314,1332,0.0056
S_L8_68_Contig6734_frame_-3	Rask_block_1,1,26,2.4e-11	Rask_block_258,27,36,0.047	Rask_block_45,39,66,7.9e-09	Rask_block_257,70,93,2.1e-12	Rask_block_30,106,131,0.012	Rask_block_15,132,153,3.1e-08	Rask_block_35,157,172,2.5e-07	Rask_block_132,175,193,0.1	Rask_block_4,195,212,1.3e-06	Rask_block_11,241,261,5.1e-13	Rask_block_158,262,280,9.1e-11	Rask_block_16,316,332,3.6e-06	Rask_block_3,333,349,3.8e-07
NS_L7_29_86610_frame_1	Rask_block_24,1,35,5.5e-10	Rask_block_10,43,72,3.9e-09	Rask_block_606,80,92,5.4e-09	Rask_block_31,94,117,2.6e-08	Rask_block_56,119,134,5.2e-05	Rask_block_137,140,153,0.014	Rask_block_366,169,177,0.004
NS_L7_29_Contig7169_frame_-1	Rask_block_8,1,30,7e-12	Rask_block_1,40,64,3e-11	Rask_block_121,74,110,0.00019	Rask_block_101,162,176,0.012	Rask_block_52,181,198,6.6e-05	Rask_block_65,212,245,1.2e-08	Rask_block_53,253,270,1.6e-07	Rask_block_4,281,298,1.8e-08	Rask_block_444,299,308,0.0023	Rask_block_13,311,332,6.1e-09	Rask_block_3,342,358,1.6e-08	Rask_block_146,359,370,7.7e-05	Rask_block_14,371,393,4e-08	Rask_block_5,403,420,3e-11	Rask_block_259,429,441,4e-06	Rask_block_2,442,459,3.8e-11	Rask_block_59,460,480,1.5e-09
NS_L7_29_Contig3358_frm2_orf57	Rask_block_1,20,45,2e-08	Rask_block_34,60,76,0.3	Rask_block_9,82,109,2.8e-12	Rask_block_6,129,152,1.1e-12	Rask_block_68,154,173,2e-05	Rask_block_23,179,198,9.8e-06	Rask_block_63,201,219,0.0015	Rask_block_26,223,239,8.6e-06	Rask_block_67,243,255,0.0025
S_L7_42_Contig5941_frame_-1	Rask_block_2,1,13,3.5e-06	Rask_block_12,15,33,4.3e-06	Rask_block_7,36,61,4.7e-11	Rask_block_1,63,88,9.8e-13	Rask_block_370,91,106,5e-10	Rask_block_9,110,132,0.00033	Rask_block_6,149,173,2.4e-12	Rask_block_148,194,229,0.005	Rask_block_22,238,257,1.4e-09	Rask_block_522,261,278,1.9e-07	Rask_block_8,281,312,8.2e-12	Rask_block_1,315,338,1.1e-12	Rask_block_24,351,389,1.3e-09	Rask_block_10,402,427,1.1e-08	Rask_block_31,440,461,0.0038
NS_L6_20_Contig16231_frame_3	Rask_block_172,4,15,1.9e-05	Rask_block_8,18,49,7.6e-14	Rask_block_1,59,84,6.4e-12	Rask_block_24,97,137,1.4e-12	Rask_block_10,147,172,9.1e-06	Rask_block_31,199,219,0.00073	Rask_block_127,224,250,4.1e-07	Rask_block_21,290,311,2.2e-09
S_L7_20_Contig5334_frame_3	Rask_block_8,1,15,0.002	Rask_block_1,22,47,1.9e-11	Rask_block_32,58,96,3.6e-17	Rask_block_10,110,137,7.1e-08	Rask_block_241,139,147,0.13	Rask_block_26,177,191,6.8e-08	Rask_block_30,211,237,0.00072	Rask_block_15,238,260,1.7e-07	Rask_block_35,265,280,3.2e-06	Rask_block_4,296,313,1.7e-07
S_L7_20_Contig5384_frame_-1	Rask_block_20,49,70,2.8e-09	Rask_block_17,73,103,1.4e-05	Rask_block_19,107,139,4.5e-13	Rask_block_4,152,169,4.1e-08	Rask_block_13,178,195,1.6e-08	Rask_block_3,211,227,1.5e-07	Rask_block_79,228,243,1.6e-05	Rask_block_14,244,267,5e-09	Rask_block_5,277,295,3.7e-09	Rask_block_36,299,324,2.1e-09	Rask_block_2,330,347,4.7e-12	Rask_block_12,348,366,7.6e-07	Rask_block_7,369,394,1.8e-10	Rask_block_1,396,421,7.2e-10	Rask_block_184,424,443,0.0018	Rask_block_9,446,471,3.2e-09	Rask_block_350,478,490,4e-07	Rask_block_6,493,518,5.4e-15	Rask_block_23,540,563,1.5e-06	Rask_block_57,577,596,0.00017	Rask_block_8,606,638,1.3e-12	Rask_block_1,648,673,1.7e-13	Rask_block_32,682,718,1.4e-10	Rask_block_10,735,756,2.5e-07	Rask_block_26,783,795,3.4e-05	Rask_block_30,811,837,0.041	Rask_block_15,839,861,1.6e-06	Rask_block_35,863,879,4.8e-07	Rask_block_132,886,905,0.2
NS_L7_35_Contig4670_frm-1_orf0	Rask_block_4,9,25,5.1e-06	Rask_block_11,34,54,2.6e-11	Rask_block_16,75,87,0.00036	Rask_block_3,88,105,8.9e-12	Rask_block_27,110,125,0.00062	Rask_block_5,133,152,3.7e-10	Rask_block_90,153,166,2.2e-05	Rask_block_96,172,192,0.069	Rask_block_2,201,218,3.2e-10
S_L8_68_Contig4326_frame_1	Rask_block_71,45,59,0.41	Rask_block_20,62,84,3.3e-11	Rask_block_17,89,119,4.7e-09	Rask_block_19,126,159,2.4e-12	Rask_block_4,165,182,2.1e-08	Rask_block_13,194,215,4.9e-13	Rask_block_381,218,226,0.13
NS_L6_18_Contig11248_frame_-2	Rask_block_76,19,54,7.1e-12	Rask_block_4,64,76,0.0004	Rask_block_11,89,108,1.2e-05	Rask_block_3,115,132,3e-08	Rask_block_5,165,183,1.1e-07	Rask_block_213,184,200,2.6e-09	Rask_block_2,202,213,1.7e-05
NS_L6_21_43643_frame_2	Rask_block_27,14,33,0.0013	Rask_block_5,48,66,2.6e-09	Rask_block_249,67,84,1.4e-06	Rask_block_29,90,111,0.017	Rask_block_170,118,129,0.0029	Rask_block_2,131,147,8.5e-08	Rask_block_12,148,163,0.0061	Rask_block_7,171,195,2.3e-10	Rask_block_1,197,222,1.6e-12	Rask_block_122,223,235,0.0095	Rask_block_9,242,264,5.6e-07	Rask_block_178,267,285,1.4e-06	Rask_block_6,288,310,4.6e-12	Rask_block_103,325,338,4.6e-06	Rask_block_85,343,361,1.4e-11	Rask_block_22,373,394,3.6e-10	Rask_block_83,399,411,0.029	Rask_block_8,413,446,4.4e-12	Rask_block_1,455,478,6.2e-08	Rask_block_212,481,530,3.5e-23	Rask_block_31,586,605,0.0018	Rask_block_137,630,642,4.1e-07	Rask_block_95,649,664,0.0016	Rask_block_21,670,682,0.019
NS_L1_95_Contig9259_frame_-2	Rask_block_12,7,24,7.9e-06	Rask_block_7,26,51,4e-12	Rask_block_1,53,78,7e-10	Rask_block_239,81,89,0.0013	Rask_block_9,115,143,3e-13	Rask_block_348,144,164,7.8e-14	Rask_block_6,165,189,4.4e-14	Rask_block_68,192,212,1e-08	Rask_block_23,213,236,0.0016	Rask_block_480,239,246,0.051	Rask_block_71,251,264,0.063	Rask_block_63,280,299,1.8e-10	Rask_block_67,317,329,3.1e-06	Rask_block_8,339,370,4.4e-15	Rask_block_1,380,405,9.6e-11	Rask_block_32,414,452,1.7e-14	Rask_block_10,474,500,4.1e-07	Rask_block_52,537,554,4.7e-05	Rask_block_65,561,594,9.5e-14	Rask_block_53,601,619,2.4e-06
NS_L1_88_Contig11786_frm-3_orf0	Rask_block_1,5,28,3.3e-09	Rask_block_24,39,78,1.6e-13	Rask_block_10,86,112,4.2e-09	Rask_block_195,118,128,0.27	Rask_block_31,130,151,6.1e-07	Rask_block_56,155,171,0.0056	Rask_block_21,225,249,6.7e-13
S_L7_20_Contig6499_frame_-2	Rask_block_22,1,10,0.0082	Rask_block_417,12,20,0.00018	Rask_block_8,25,58,9.9e-17	Rask_block_1,67,93,9e-10	Rask_block_24,105,145,5.8e-17	Rask_block_10,155,184,2.6e-10	Rask_block_31,199,218,0.0001	Rask_block_56,222,236,0.002	Rask_block_221,243,261,0.0017	Rask_block_21,288,313,1.9e-13	Rask_block_41,315,329,0.058
NS_L7_19_Contig9667_frame_-1	Rask_block_1,2,27,5.7e-09	Rask_block_239,28,38,0.0015	Rask_block_34,39,56,9.4e-05	Rask_block_9,60,88,7.9e-13	Rask_block_75,94,110,1.7e-09	Rask_block_6,116,139,3.5e-13	Rask_block_143,142,159,3.8e-07	Rask_block_23,161,184,2.3e-09
NS_L1_80_Contig12000_frm-2_orf0	Rask_block_3,1,17,1.6e-08	Rask_block_82,20,42,0.00017	Rask_block_5,53,71,8.5e-10	Rask_block_133,72,97,1.9e-09	Rask_block_2,109,125,5.6e-11	Rask_block_48,126,145,4.1e-05	Rask_block_1,154,179,9.2e-10	Rask_block_45,197,228,1e-09	Rask_block_18,247,266,0.00085	Rask_block_318,274,354,1.9e-35	Rask_block_4,366,383,5.6e-08	Rask_block_13,393,412,0.00011	Rask_block_3,426,442,9.9e-09	Rask_block_14,453,471,0.0037	Rask_block_5,487,505,1.7e-08	Rask_block_549,507,519,2.2e-05	Rask_block_92,524,541,1.4e-08	Rask_block_2,542,558,1.1e-09	Rask_block_1,598,623,3.6e-08	Rask_block_18,680,698,1.3e-05	Rask_block_4,738,753,0.00056	Rask_block_3,813,830,8.2e-07	Rask_block_5,862,880,2.1e-07	Rask_block_2,904,919,8.4e-09	Rask_block_48,921,940,0.053	Rask_block_1,949,974,3.6e-07	Rask_block_45,981,1005,0.013	Rask_block_18,1015,1028,0.17	Rask_block_355,1031,1056,8.3e-17	Rask_block_76,1074,1110,7.1e-10	Rask_block_4,1111,1123,0.00024	Rask_block_160,1131,1158,7.7e-12	Rask_block_3,1167,1182,5.1e-07	Rask_block_126,1184,1201,8.2e-09	Rask_block_5,1208,1226,7.3e-08	Rask_block_2,1246,1262,1.2e-10	Rask_block_48,1264,1283,0.019	Rask_block_1,1293,1318,0.00023	Rask_block_45,1333,1350,0.0038	Rask_block_78,1356,1375,1.2e-09	Rask_block_95,1380,1397,0.0074	Rask_block_21,1400,1425,1.5e-11
NS_L7_19_Contig9885_frame_1	Rask_block_6,4,21,2.1e-09	Rask_block_477,28,44,0.0073	Rask_block_85,50,69,0.00035	Rask_block_22,76,97,7.3e-10	Rask_block_176,101,113,5.3e-06	Rask_block_8,115,148,6.7e-18	Rask_block_1,161,186,6.2e-11	Rask_block_24,198,235,1.5e-10	Rask_block_10,247,271,7.3e-10
NS_L1_80_Contig33538_frame_1	Rask_block_2,1,16,8.4e-11	Rask_block_12,17,36,5.1e-06	Rask_block_7,41,66,2.3e-09	Rask_block_1,68,93,7e-10	Rask_block_34,103,122,7.4e-06	Rask_block_9,126,153,1.7e-10	Rask_block_75,156,171,9.8e-07	Rask_block_245,187,196,0.00078	Rask_block_6,199,223,4.6e-13	Rask_block_68,230,250,1.2e-10	Rask_block_23,253,274,1.8e-08	Rask_block_63,283,301,2.5e-06	Rask_block_114,303,320,7.2e-06	Rask_block_67,322,333,3.6e-06	Rask_block_354,337,347,0.05	Rask_block_8,349,382,1.7e-16	Rask_block_1,390,415,1.7e-10	Rask_block_32,429,476,6.5e-13	Rask_block_595,484,495,0.0013	Rask_block_10,496,522,1.2e-07	Rask_block_26,556,571,0.00048	Rask_block_30,582,607,0.085	Rask_block_15,610,629,0.0019	Rask_block_35,633,649,4.9e-07	Rask_block_34,656,674,0.25	Rask_block_4,678,695,2.1e-06	Rask_block_81,704,722,0.24	Rask_block_11,726,746,2.3e-10	Rask_block_158,747,769,1.5e-07	Rask_block_16,780,796,2e-06	Rask_block_3,797,813,5.3e-07	Rask_block_156,819,830,0.00043	Rask_block_27,835,855,0.14	Rask_block_5,869,888,2.2e-10	Rask_block_29,927,948,0.0015	Rask_block_87,952,964,0.00014	Rask_block_2,966,977,0.0038
S_L7_20_Contig5347_frame_2	Rask_block_194,21,30,0.04	Rask_block_20,89,109,1.2e-06	Rask_block_17,113,148,4.7e-07	Rask_block_19,152,185,1.5e-14	Rask_block_4,195,212,2e-06	Rask_block_13,221,242,1.2e-08	Rask_block_3,254,271,1.3e-07	Rask_block_54,272,286,9.1e-05	Rask_block_14,289,307,6.5e-08	Rask_block_161,322,331,0.00058	Rask_block_5,332,350,1.2e-09	Rask_block_36,354,379,1.5e-08	Rask_block_163,380,386,0.01	Rask_block_2,387,404,4.9e-12	Rask_block_12,405,423,5.2e-05	Rask_block_7,426,451,4.9e-08	Rask_block_1,453,478,3.6e-07	Rask_block_70,479,507,1.4e-10	Rask_block_9,508,535,5e-11	Rask_block_6,555,577,2.9e-09	Rask_block_23,601,624,4.4e-08	Rask_block_57,632,648,4.2e-07	Rask_block_223,649,657,0.099	Rask_block_8,661,693,1.6e-14	Rask_block_1,700,725,6.9e-10	Rask_block_32,735,768,3.7e-05	Rask_block_10,784,811,2.6e-05	Rask_block_26,835,848,1.7e-06	Rask_block_26,859,872,0.12	Rask_block_30,911,937,0.0035	Rask_block_15,938,959,9.4e-05	Rask_block_35,963,978,4.2e-05	Rask_block_4,991,1008,7.3e-06	Rask_block_469,1013,1020,0.23	Rask_block_73,1045,1060,0.35	Rask_block_11,1065,1085,2e-09	Rask_block_158,1086,1104,8.7e-10	Rask_block_16,1112,1129,2.9e-05	Rask_block_3,1130,1147,2.5e-09	Rask_block_573,1148,1156,0.026	Rask_block_27,1160,1178,0.00016	Rask_block_5,1191,1209,3.5e-06	Rask_block_55,1217,1234,0.048	Rask_block_29,1238,1259,2.9e-07	Rask_block_105,1267,1277,0.00021	Rask_block_2,1279,1295,1.9e-07	Rask_block_12,1296,1314,0.088	Rask_block_7,1317,1342,2.7e-08	Rask_block_1,1344,1369,3.2e-08
NS_L7_32_Contig13937_frame_-3	Rask_block_1,1,23,2.8e-08	Rask_block_32,32,70,4.6e-15	Rask_block_10,82,109,1.3e-08	Rask_block_26,136,150,0.00065	Rask_block_15,190,212,2.5e-08	Rask_block_35,218,227,0.00047	Rask_block_132,239,262,0.027	Rask_block_4,263,280,2.3e-06	Rask_block_73,339,353,0.00047	Rask_block_11,360,380,2.6e-11	Rask_block_16,408,424,0.0047	Rask_block_3,425,442,2.1e-09	Rask_block_228,445,454,0.004	Rask_block_27,456,474,0.0021	Rask_block_5,493,511,5.1e-11	Rask_block_249,512,527,0.00021	Rask_block_369,539,551,1.9e-05	Rask_block_29,553,575,4.1e-09	Rask_block_105,587,596,0.0004	Rask_block_2,599,615,1.2e-07	Rask_block_12,616,633,0.0067	Rask_block_7,635,658,0.0027	Rask_block_1,661,686,5.2e-09	Rask_block_72,689,703,0.075	Rask_block_9,712,732,9.1e-06	Rask_block_443,740,750,0.00052	Rask_block_6,751,776,7.7e-09	Rask_block_243,784,792,0.029	Rask_block_50,797,822,7.3e-11	Rask_block_22,825,847,7e-13	Rask_block_247,848,860,0.2	Rask_block_8,864,895,8.6e-15	Rask_block_1,901,924,1e-07	Rask_block_24,936,977,7.3e-13	Rask_block_10,985,1010,1e-09	Rask_block_31,1025,1043,0.0013	Rask_block_127,1051,1077,2.5e-07	Rask_block_33,1088,1108,0.00046	Rask_block_21,1116,1141,1.1e-13
S_L8_68_Contig3125_frm3_orf6	Rask_block_5,26,45,4e-11	Rask_block_380,65,77,0.008	Rask_block_2,79,94,1.7e-10	Rask_block_48,102,118,0.0054
NS_L7_27_Contig2001_frame_3	Rask_block_1,9,25,5.4e-05	Rask_block_121,32,71,6.3e-23	Rask_block_10,89,114,5.9e-07	Rask_block_141,117,131,2.2e-06	Rask_block_52,139,156,0.0008	Rask_block_65,162,195,9e-16
NS_L6_18_Contig16093_frame_-2	Rask_block_1,1,23,1.1e-09	Rask_block_122,24,41,7e-06	Rask_block_9,42,64,0.00054	Rask_block_178,68,86,1.1e-06	Rask_block_6,88,111,1e-10	Rask_block_22,160,182,0.00052	Rask_block_8,199,230,2.2e-10	Rask_block_1,238,263,2.3e-11	Rask_block_24,275,314,7.1e-10	Rask_block_10,325,352,3.6e-09	Rask_block_31,362,382,0.0004	Rask_block_52,384,400,0.00056	Rask_block_315,404,469,4.7e-09	Rask_block_4,476,491,0.00034	Rask_block_13,501,521,0.011	Rask_block_3,533,550,4.5e-09	Rask_block_587,551,562,3.7e-07	Rask_block_311,563,582,0.15	Rask_block_5,597,616,1.2e-10	Rask_block_559,617,636,6.7e-08	Rask_block_92,640,655,2.9e-07	Rask_block_2,656,673,9.1e-09	Rask_block_99,675,704,1.8e-11	Rask_block_1,706,731,0.004	Rask_block_592,733,788,2.8e-22	Rask_block_93,793,810,3.9e-06	Rask_block_18,830,849,1.2e-08	Rask_block_124,851,864,6.6e-05	Rask_block_76,869,905,9.9e-13	Rask_block_4,906,920,2.1e-05	Rask_block_11,933,953,0.0001	Rask_block_3,960,976,3.5e-08	Rask_block_108,977,996,2.5e-06	Rask_block_5,1008,1027,5.3e-12	Rask_block_142,1034,1047,2.2e-05	Rask_block_2,1048,1064,2.4e-09	Rask_block_48,1066,1086,4.6e-05	Rask_block_1,1095,1114,0.00049	Rask_block_45,1126,1152,2.6e-09	Rask_block_78,1157,1177,4.2e-09	Rask_block_529,1179,1195,0.014	Rask_block_95,1200,1216,0.009	Rask_block_21,1219,1244,3.5e-10
NS_L6_18_Contig14695_frame_3	Rask_block_22,1,20,1.9e-11	Rask_block_159,21,34,7.3e-07	Rask_block_8,37,70,2.2e-14	Rask_block_1,75,98,3e-09	Rask_block_387,102,108,0.19	Rask_block_24,111,151,1.7e-12	Rask_block_10,160,186,1.9e-11	Rask_block_31,194,215,8.6e-05	Rask_block_56,219,238,1.4e-06	Rask_block_33,279,295,0.02	Rask_block_21,303,322,1.3e-06
S_L7_20_Contig6524_frame_2	Rask_block_50,12,30,6.1e-08	Rask_block_22,34,56,4e-13	Rask_block_159,57,64,0.021	Rask_block_8,72,104,5.4e-14	Rask_block_1,114,139,1e-11	Rask_block_24,150,190,1.4e-15	Rask_block_10,197,223,2.3e-08	Rask_block_31,241,263,1.6e-06	Rask_block_33,299,318,0.0063	Rask_block_376,321,327,0.066	Rask_block_21,328,353,1.4e-11	Rask_block_182,356,363,0.38	Rask_block_182,387,395,0.069
NS_L1_80_Contig21795_frame_3	Rask_block_8,1,17,0.00023	Rask_block_1,28,51,3.5e-12	Rask_block_121,58,99,7.3e-15	Rask_block_450,103,114,0.0005	Rask_block_10,115,142,1.4e-08	Rask_block_141,143,160,7.6e-05	Rask_block_52,163,180,0.011	Rask_block_65,185,220,1.2e-16	Rask_block_53,229,249,0.0013	Rask_block_4,259,276,7.1e-08	Rask_block_189,277,289,0.00057	Rask_block_13,295,316,4.9e-06	Rask_block_3,328,345,4.1e-08	Rask_block_174,346,356,0.00027	Rask_block_14,358,381,0.0033	Rask_block_5,395,414,3.1e-11	Rask_block_187,418,429,1.9e-05	Rask_block_2,430,447,0.00029	Rask_block_1,475,494,2.3e-05	Rask_block_62,517,539,0.0001	Rask_block_61,563,577,0.022	Rask_block_26,621,633,2.3e-05	Rask_block_15,656,678,0.00052	Rask_block_139,687,700,4.7e-05	Rask_block_4,702,716,1.3e-06	Rask_block_11,731,751,2.7e-10	Rask_block_16,754,769,0.005	Rask_block_3,770,786,3.7e-06	Rask_block_86,788,810,0.0058	Rask_block_5,828,842,7.5e-05	Rask_block_94,861,881,1.2e-05	Rask_block_2,883,899,3.5e-10	Rask_block_48,900,919,4e-07	Rask_block_1,931,954,5e-08	Rask_block_45,964,1003,2.9e-12	Rask_block_397,1004,1020,8.7e-14	Rask_block_18,1026,1045,3.9e-07	Rask_block_227,1046,1063,5.4e-15	Rask_block_123,1074,1094,5.2e-09	Rask_block_235,1096,1115,1.1e-07	Rask_block_53,1118,1137,4e-06	Rask_block_4,1147,1161,0.00031	Rask_block_13,1172,1193,0.00021	Rask_block_393,1194,1203,0.0016	Rask_block_3,1204,1221,5.2e-09	Rask_block_14,1238,1256,0.063	Rask_block_5,1268,1287,5.2e-10	Rask_block_489,1288,1304,2.9e-11	Rask_block_92,1305,1322,5e-10
NS_L7_35_Contig5583_frame_3	Rask_block_1,15,38,1.5e-08	Rask_block_24,50,90,6.4e-15	Rask_block_10,101,127,1.3e-12	Rask_block_31,139,157,1.5e-05	Rask_block_56,162,176,0.0021	Rask_block_254,196,215,0.0035	Rask_block_21,235,256,1.2e-08
NS_L8_51_Contig3284_frame_-3	Rask_block_15,19,43,2.6e-09	Rask_block_74,48,62,1.5e-06	Rask_block_4,66,80,3.3e-06	Rask_block_11,91,111,7e-11	Rask_block_16,127,142,0.053	Rask_block_3,143,159,4.8e-09	Rask_block_86,161,184,1.9e-08	Rask_block_5,195,214,1.7e-09	Rask_block_167,223,240,6.5e-08	Rask_block_2,242,258,3.5e-11	Rask_block_48,259,279,0.003	Rask_block_1,290,315,9.3e-11	Rask_block_586,316,322,0.29	Rask_block_45,338,363,8.4e-10	Rask_block_18,375,394,5.2e-06	Rask_block_318,397,484,1.6e-09	Rask_block_4,497,508,0.0061	Rask_block_13,523,543,5.4e-06	Rask_block_393,544,553,2.8e-05	Rask_block_3,554,571,5.3e-10	Rask_block_387,572,582,1e-06	Rask_block_14,583,602,0.018	Rask_block_5,610,628,8e-12	Rask_block_284,631,651,6.7e-13
NS_L7_17_Contig5060_frm-1_orf0	Rask_block_13,1,18,3.8e-06	Rask_block_3,33,50,8.1e-10	Rask_block_174,51,61,5.4e-05	Rask_block_14,64,85,0.0042	Rask_block_5,97,114,1.2e-09	Rask_block_589,121,133,2.7e-06	Rask_block_2,134,151,1.1e-09	Rask_block_59,152,170,9.9e-06	Rask_block_1,183,208,1.2e-09	Rask_block_62,225,247,3.7e-07	Rask_block_61,252,276,6.7e-17	Rask_block_18,285,302,0.00042	Rask_block_15,312,335,1.2e-05	Rask_block_139,340,354,2.8e-05	Rask_block_4,356,373,8.4e-09	Rask_block_11,383,402,2.5e-08	Rask_block_16,405,419,0.0054	Rask_block_3,421,438,6.9e-09	Rask_block_82,441,462,3.6e-07	Rask_block_5,473,490,1.7e-06	Rask_block_519,491,509,5e-10	Rask_block_2,512,528,6.4e-12	Rask_block_48,529,546,0.002	Rask_block_1,560,585,1.1e-08	Rask_block_45,597,636,5.6e-10	Rask_block_18,641,660,2.9e-05	Rask_block_26,699,711,0.013	Rask_block_26,768,781,1.5e-05	Rask_block_33,831,848,0.056	Rask_block_21,865,890,2.3e-13
NS_L1_95_Contig9044_frame_-3	Rask_block_8,2,33,3.1e-13	Rask_block_1,41,66,2.6e-12	Rask_block_24,79,117,1.2e-12	Rask_block_10,130,156,8.1e-08
NS_L1_80_Contig21326_frame_1	Rask_block_5,7,26,3.3e-11	Rask_block_55,39,57,0.0019	Rask_block_29,64,83,3.8e-06	Rask_block_498,87,96,1.6e-05	Rask_block_2,97,113,5.1e-08	Rask_block_12,116,134,3.7e-08	Rask_block_7,138,162,5.3e-06	Rask_block_1,165,190,3e-10	Rask_block_122,191,207,1.5e-06	Rask_block_9,209,231,0.0033	Rask_block_178,233,251,2.8e-05	Rask_block_6,252,275,1.7e-10	Rask_block_148,299,317,5.6e-09	Rask_block_22,335,355,2.9e-09	Rask_block_8,373,406,1.2e-15	Rask_block_1,417,442,1.6e-13	Rask_block_24,454,496,5.5e-12	Rask_block_10,507,531,9.5e-07	Rask_block_254,568,584,0.075	Rask_block_33,606,626,0.00033	Rask_block_21,632,657,1.5e-13
S_L7_20_Contig6441_frame_-2	Rask_block_194,52,60,0.2	Rask_block_20,73,93,1.9e-09	Rask_block_17,97,132,3.2e-06	Rask_block_19,137,169,9.5e-15	Rask_block_4,180,197,1.9e-07	Rask_block_13,206,227,6.1e-10
NS_L8_50_Contig3872_frame_3	Rask_block_173,6,20,1.4e-07	Rask_block_50,26,48,1e-06	Rask_block_22,56,78,7.1e-12	Rask_block_107,80,94,1.3e-05	Rask_block_8,101,133,2.3e-16	Rask_block_1,138,159,9.3e-09	Rask_block_10,220,243,2.2e-07	Rask_block_459,249,254,0.14	Rask_block_31,261,284,1.8e-08	Rask_block_56,287,305,2.5e-06	Rask_block_137,318,329,4.1e-07	Rask_block_21,357,374,5.3e-05
NS_L7_27_Contig6121_frm2_orf3	Rask_block_20,23,45,1.5e-05	Rask_block_17,52,82,0.023	Rask_block_19,84,117,1.5e-15	Rask_block_4,123,140,1e-05	Rask_block_13,149,170,1.3e-10	Rask_block_3,181,198,2.7e-07	Rask_block_204,199,209,7.7e-06	Rask_block_14,212,232,0.003	Rask_block_5,239,257,1.2e-08	Rask_block_36,261,287,7.5e-10	Rask_block_2,292,309,1.1e-11	Rask_block_12,310,328,0.00013	Rask_block_7,331,356,1.2e-10	Rask_block_1,358,383,1.4e-10	Rask_block_34,397,415,0.00048	Rask_block_9,419,446,3.7e-10	Rask_block_75,449,465,1.6e-07	Rask_block_6,470,493,4.9e-16	Rask_block_23,518,541,5.9e-08	Rask_block_57,552,570,8.1e-06	Rask_block_8,581,611,4.2e-14	Rask_block_1,623,648,3.4e-11	Rask_block_32,657,692,5e-13	Rask_block_10,708,735,1.7e-08	Rask_block_101,740,761,1.9e-08	Rask_block_52,770,785,0.048	Rask_block_65,791,824,2.1e-12	Rask_block_53,832,851,0.043	Rask_block_4,860,877,8.3e-07	Rask_block_13,892,913,1.4e-07	Rask_block_3,926,943,1.2e-07	Rask_block_174,944,954,0.00062	Rask_block_14,956,979,0.00098	Rask_block_5,990,1009,1.4e-11	Rask_block_400,1010,1030,6e-11	Rask_block_2,1031,1048,1.8e-10	Rask_block_59,1049,1069,1e-07	Rask_block_250,1073,1081,0.0046	Rask_block_1,1083,1108,4.4e-07	Rask_block_119,1109,1121,0.0048	Rask_block_61,1152,1176,5.9e-13	Rask_block_18,1180,1198,7.1e-08	Rask_block_15,1217,1239,1.8e-06	Rask_block_139,1248,1262,0.041	Rask_block_4,1265,1281,1.7e-06	Rask_block_11,1290,1310,3.6e-10	Rask_block_16,1323,1338,0.00021	Rask_block_3,1339,1356,3.2e-06	Rask_block_86,1357,1377,1.9e-07
NS_L1_73_286889_frame_3	Rask_block_1,2,27,1.5e-11	Rask_block_45,43,75,3e-09	Rask_block_18,87,106,9.1e-07	Rask_block_52,114,131,0.0011	Rask_block_123,132,152,3.1e-07	Rask_block_338,154,174,1.6e-12	Rask_block_53,176,194,6.1e-05	Rask_block_4,207,223,9.4e-06	Rask_block_13,232,252,8.7e-05	Rask_block_462,254,263,0.00016	Rask_block_3,264,281,5.8e-10	Rask_block_14,292,306,0.0083	Rask_block_5,318,336,6.4e-12	Rask_block_549,338,352,3.2e-11	Rask_block_92,355,372,1e-08	Rask_block_2,373,390,1.8e-10	Rask_block_99,391,422,2e-16	Rask_block_1,424,449,3.7e-06	Rask_block_115,463,479,1.3e-05	Rask_block_93,485,502,2.3e-07	Rask_block_18,508,527,6.2e-07	Rask_block_124,531,545,1.7e-06	Rask_block_76,546,582,3.2e-14	Rask_block_4,583,598,6e-06	Rask_block_475,601,609,5.8e-05	Rask_block_11,610,630,0.00029	Rask_block_3,638,653,1.9e-07	Rask_block_126,655,672,2.2e-05	Rask_block_5,679,698,1.7e-10	Rask_block_142,705,718,0.00049
NS_L7_35_Contig2482_frm1_orf15	Rask_block_264,11,32,2.9e-12	Rask_block_20,34,55,2.1e-05	Rask_block_17,58,97,1.6e-10	Rask_block_19,103,134,7.1e-14	Rask_block_4,143,158,3.2e-08	Rask_block_13,169,190,1.9e-08	Rask_block_3,202,219,7.4e-07	Rask_block_248,221,231,0.00013	Rask_block_14,234,252,2.9e-05	Rask_block_5,261,279,1.4e-05	Rask_block_60,294,314,4.8e-08	Rask_block_2,315,332,9.3e-11	Rask_block_12,333,350,4.3e-05	Rask_block_7,353,378,8.4e-10	Rask_block_1,380,405,1.1e-08	Rask_block_70,406,430,4.2e-08	Rask_block_9,437,457,1.1e-07	Rask_block_6,471,496,8.6e-11	Rask_block_150,500,518,3.4e-07	Rask_block_23,520,543,1.2e-09	Rask_block_57,554,574,6.9e-12	Rask_block_8,584,617,5.4e-15	Rask_block_1,626,651,2.6e-10	Rask_block_121,657,695,5.4e-19	Rask_block_368,697,710,2.1e-07	Rask_block_10,713,737,3.5e-06	Rask_block_141,739,756,4.9e-06	Rask_block_52,757,773,0.002	Rask_block_65,780,815,1.7e-15	Rask_block_53,824,843,1.5e-05	Rask_block_4,854,871,4e-07	Rask_block_13,890,911,2.1e-07	Rask_block_3,920,937,2.1e-06	Rask_block_146,938,949,3.6e-06	Rask_block_14,950,972,0.00019	Rask_block_5,983,1002,1.3e-10	Rask_block_470,1003,1014,2.9e-06	Rask_block_183,1015,1028,2.4e-10	Rask_block_2,1029,1046,4.3e-08	Rask_block_59,1047,1067,9.3e-08	Rask_block_1,1081,1106,0.014	Rask_block_62,1124,1147,5.9e-06	Rask_block_61,1168,1193,6.5e-16	Rask_block_18,1209,1227,0.00022	Rask_block_15,1247,1271,1.9e-05	Rask_block_74,1277,1291,3.2e-06	Rask_block_4,1294,1311,2.3e-05	Rask_block_11,1321,1339,7.1e-09	Rask_block_16,1350,1363,0.056
NS_L1_84_Contig8069_frame_-2	Rask_block_83,4,16,1.4e-05	Rask_block_8,18,53,7.7e-14	Rask_block_1,62,86,4.7e-07	Rask_block_24,97,140,3.7e-16	Rask_block_10,149,176,1.6e-13	Rask_block_543,177,186,0.0084	Rask_block_31,189,205,0.00033	Rask_block_56,210,226,8.3e-05	Rask_block_28,239,249,0.18
NS_L7_17_23732_frame_1	Rask_block_72,13,29,0.00019	Rask_block_9,36,58,3.8e-06	Rask_block_6,69,93,4.6e-14	Rask_block_50,114,140,1.6e-09	Rask_block_22,144,166,7.9e-13	Rask_block_159,167,179,5.3e-08	Rask_block_8,183,215,1.2e-19	Rask_block_1,220,245,7.2e-10	Rask_block_24,257,292,1.3e-11
NS_L8_65_Contig5580_frame_1	Rask_block_20,67,87,2e-06	Rask_block_17,91,122,1.6e-10	Rask_block_19,124,157,2.8e-12	Rask_block_4,166,183,1.6e-06	Rask_block_13,192,213,1.2e-08	Rask_block_3,227,244,1.9e-06	Rask_block_171,245,255,0.00042	Rask_block_14,258,281,0.004	Rask_block_5,292,311,3.4e-10	Rask_block_60,322,345,5.2e-05	Rask_block_2,346,363,6.2e-12	Rask_block_12,364,383,6.1e-05	Rask_block_7,387,412,2.3e-11	Rask_block_1,414,439,8.3e-12	Rask_block_70,440,464,1.9e-07	Rask_block_9,465,491,3.4e-08	Rask_block_268,492,503,0.00087	Rask_block_6,508,525,1.4e-09	Rask_block_23,555,578,1.3e-07	Rask_block_104,579,592,0.0011	Rask_block_63,597,615,2.6e-09	Rask_block_8,634,667,1.1e-14	Rask_block_1,675,700,2.2e-11	Rask_block_32,715,751,1e-10	Rask_block_10,765,790,9.9e-08	Rask_block_101,795,820,3.2e-10	Rask_block_52,823,839,0.17	Rask_block_65,844,877,1.3e-13	Rask_block_53,887,906,0.001	Rask_block_4,915,932,1.2e-05	Rask_block_13,948,969,0.00018	Rask_block_3,979,996,6.4e-09	Rask_block_146,997,1008,0.073	Rask_block_14,1009,1029,0.016	Rask_block_5,1038,1055,2.5e-11	Rask_block_231,1063,1072,5.5e-06	Rask_block_2,1073,1090,4.6e-11	Rask_block_59,1091,1111,3.9e-08	Rask_block_1,1123,1148,3e-09	Rask_block_61,1199,1224,1.8e-17	Rask_block_18,1238,1256,2.4e-09	Rask_block_15,1270,1294,0.00012	Rask_block_4,1316,1332,3.1e-07	Rask_block_11,1341,1361,7.2e-10	Rask_block_232,1363,1379,4.8e-06	Rask_block_3,1380,1392,0.025	Rask_block_86,1398,1418,0.0042	Rask_block_5,1429,1448,2.3e-09	Rask_block_2,1484,1497,6.4e-07
NS_L7_27_Contig7028_frame_2	Rask_block_3,4,19,1.1e-06	Rask_block_358,26,44,3.4e-14	Rask_block_27,50,70,1.2e-05	Rask_block_5,85,103,9.8e-11	Rask_block_96,128,147,1.3e-06	Rask_block_2,155,171,3.7e-08	Rask_block_12,172,186,0.0077	Rask_block_7,194,216,0.00012	Rask_block_1,220,245,9.8e-12	Rask_block_72,246,262,2.6e-06	Rask_block_9,263,288,6.5e-09	Rask_block_361,291,299,0.00026	Rask_block_6,302,326,3e-05	Rask_block_226,327,338,0.0043	Rask_block_50,348,372,3.2e-09	Rask_block_22,378,400,2.9e-12
S_L3_13_Contig1989_frame_1	Rask_block_20,47,69,4.7e-10	Rask_block_17,74,104,1.5e-08	Rask_block_19,107,141,7.8e-15	Rask_block_4,146,163,7.8e-09	Rask_block_13,173,194,2.5e-07	Rask_block_3,209,224,5.1e-06	Rask_block_79,226,241,1.6e-07	Rask_block_14,242,260,0.0002	Rask_block_5,269,286,2.7e-08	Rask_block_36,290,317,2.8e-13	Rask_block_153,332,338,0.0022
NS_L1_80_Contig33183_frame_3	Rask_block_10,11,35,0.0002	Rask_block_340,54,82,3.1e-20	Rask_block_30,92,117,0.00022	Rask_block_15,118,141,7.6e-06	Rask_block_35,145,160,3.3e-07	Rask_block_4,181,190,0.00076
NS_L1_80_Contig32971_frame_1	Rask_block_24,13,52,1.9e-12	Rask_block_10,58,84,8.1e-11	Rask_block_31,96,116,0.00037	Rask_block_56,118,136,0.0063	Rask_block_28,146,154,0.038
S_L7_16_Contig5070_frame_1	Rask_block_4,1,15,0.0019	Rask_block_81,20,41,1.1e-05	Rask_block_11,47,67,3.4e-10	Rask_block_77,68,86,1.1e-06	Rask_block_16,95,110,0.00023	Rask_block_3,111,128,9.1e-08	Rask_block_27,143,160,0.00059	Rask_block_5,175,193,4.4e-11	Rask_block_55,205,222,0.0028	Rask_block_29,228,247,0.00021	Rask_block_105,263,273,1.8e-05	Rask_block_2,275,291,3.2e-08
NS_L6_21_Contig10948_frame_2	Rask_block_61,3,11,0.082	Rask_block_18,26,45,1.3e-09	Rask_block_15,66,90,1.5e-06	Rask_block_139,95,108,5.1e-06	Rask_block_4,110,127,5.8e-10	Rask_block_11,136,156,2.2e-11	Rask_block_16,169,184,1.3e-05
NS_L6_24_Contig6786_frame_-1	Rask_block_9,4,27,5.8e-06	Rask_block_244,37,49,0.0016	Rask_block_6,50,74,1.9e-11	Rask_block_50,94,120,4.2e-07	Rask_block_22,124,146,9.9e-13	Rask_block_159,147,154,0.028	Rask_block_8,162,179,3.3e-06
S_L8_68_Contig6577_frame_3	Rask_block_5,6,25,1.6e-12	Rask_block_29,40,62,2e-05	Rask_block_2,67,83,7.2e-12	Rask_block_48,84,103,1.1e-07	Rask_block_1,113,138,1.6e-10	Rask_block_45,150,189,9.7e-13	Rask_block_397,190,206,1e-14	Rask_block_18,212,231,4.3e-08	Rask_block_227,232,249,6.4e-16
NS_L6_20_Contig17440_frame_-3	Rask_block_8,1,26,1.6e-09	Rask_block_1,35,60,9e-13	Rask_block_32,73,109,6.1e-09	Rask_block_10,123,148,4.1e-06	Rask_block_246,150,165,0.13	Rask_block_26,196,209,0.0014	Rask_block_15,239,261,4.9e-07	Rask_block_35,263,277,5.1e-05	Rask_block_4,280,297,6.2e-06	Rask_block_165,308,327,1.1e-06	Rask_block_11,328,348,2.2e-10	Rask_block_16,375,392,1.3e-06	Rask_block_3,393,408,1.2e-07	Rask_block_177,421,430,0.00068	Rask_block_27,433,453,0.00065	Rask_block_5,465,484,2.3e-07	Rask_block_55,492,509,0.00025	Rask_block_29,525,548,2e-06	Rask_block_105,560,570,8.3e-06	Rask_block_2,573,587,1.8e-07	Rask_block_12,589,606,0.0015	Rask_block_7,609,633,9e-08	Rask_block_1,635,660,1.1e-11	Rask_block_9,682,700,0.0021	Rask_block_6,712,737,3.8e-10	Rask_block_243,742,754,0.00012	Rask_block_50,755,780,1.2e-10	Rask_block_22,786,808,9e-13	Rask_block_172,810,822,7.8e-06	Rask_block_8,825,858,2.5e-15	Rask_block_1,863,886,2.6e-05	Rask_block_24,898,937,6.4e-12	Rask_block_10,945,972,2.3e-08	Rask_block_31,992,1011,0.0006	Rask_block_56,1014,1032,0.0039	Rask_block_21,1114,1135,5.6e-09
NS_L1_84_Contig9270_frame_-3	Rask_block_12,11,29,1.8e-05	Rask_block_7,32,56,9.1e-09	Rask_block_1,59,84,3.7e-09	Rask_block_72,86,101,0.00081	Rask_block_9,109,129,0.0026	Rask_block_6,149,171,9e-13	Rask_block_149,173,185,0.21	Rask_block_50,190,217,4.6e-13	Rask_block_22,220,242,3.2e-14	Rask_block_8,258,289,2.9e-14	Rask_block_1,300,325,9.2e-11	Rask_block_24,338,378,1.3e-14	Rask_block_10,387,414,4.9e-07	Rask_block_31,426,444,2.5e-06	Rask_block_127,449,473,1.2e-09	Rask_block_21,534,558,8.8e-11
NS_L1_84_31554_frame_-3	Rask_block_57,22,40,2e-05	Rask_block_116,45,57,0.0004	Rask_block_8,60,91,1.9e-14	Rask_block_472,93,100,0.00026	Rask_block_1,102,128,1.3e-11	Rask_block_32,138,175,5.9e-12	Rask_block_372,188,200,0.042	Rask_block_10,203,228,4.5e-06	Rask_block_26,261,275,5.3e-05	Rask_block_15,305,326,6.7e-05	Rask_block_35,331,347,2.3e-06	Rask_block_132,350,367,0.0047	Rask_block_4,368,385,5.5e-05	Rask_block_517,427,438,5.3e-07	Rask_block_11,439,459,7.6e-11	Rask_block_77,460,477,0.00011	Rask_block_16,488,504,2.1e-05	Rask_block_3,505,522,7.7e-09	Rask_block_27,535,554,0.00058	Rask_block_5,568,586,1.4e-10	Rask_block_301,596,607,0.11	Rask_block_29,618,630,0.12	Rask_block_105,648,658,0.00026	Rask_block_2,660,676,1.6e-07	Rask_block_12,677,695,7.5e-05	Rask_block_7,697,719,5.6e-08	Rask_block_1,723,748,3.1e-12	Rask_block_9,763,787,4.5e-06	Rask_block_6,807,828,2.1e-11	Rask_block_180,832,846,8.2e-07	Rask_block_50,850,876,2.3e-08	Rask_block_22,881,903,4.7e-13	Rask_block_107,905,919,1.6e-05	Rask_block_8,926,958,4.9e-15	Rask_block_1,963,986,3.4e-05	Rask_block_24,996,1037,4.9e-16	Rask_block_10,1046,1068,3.3e-06	Rask_block_31,1092,1110,0.00015	Rask_block_127,1115,1142,7.4e-09	Rask_block_21,1169,1194,1.2e-11
S_L7_20_Contig6458_frame_3	Rask_block_8,1,32,1.8e-15	Rask_block_1,43,60,3.2e-07	Rask_block_24,72,112,1.7e-16	Rask_block_10,120,145,1.1e-08	Rask_block_31,163,180,8.2e-06	Rask_block_56,184,199,0.055	Rask_block_205,202,214,4.1e-06	Rask_block_30,221,236,0.36	Rask_block_21,242,265,1.1e-10
NS_L6_21_Contig9856_frame_2	Rask_block_1,1,19,4.7e-06	Rask_block_24,30,71,5.9e-16	Rask_block_10,73,86,0.00094
NS_L8_54_Contig9534_frame_2	Rask_block_24,19,58,9.3e-17	Rask_block_10,66,95,2.9e-06	Rask_block_207,101,108,0.001	Rask_block_31,113,135,2.6e-08	Rask_block_56,138,154,0.0019	Rask_block_28,174,185,0.038
NS_L7_29_Contig7994_frame_2	Rask_block_1,2,27,1.6e-10	Rask_block_122,28,44,0.0039	Rask_block_9,47,69,4.9e-05	Rask_block_6,85,110,8.7e-13	Rask_block_103,117,133,2.1e-06	Rask_block_85,140,158,3.5e-10	Rask_block_22,164,184,4.6e-09	Rask_block_83,189,201,9.4e-06	Rask_block_8,203,236,2.8e-13	Rask_block_1,245,268,4.7e-08	Rask_block_212,271,320,2.6e-23	Rask_block_31,375,393,0.00012	Rask_block_28,399,406,0.0082	Rask_block_366,434,443,0.0027	Rask_block_21,446,470,6.1e-13
S_L3_13_Contig6053_frame_2	Rask_block_1,10,35,8.7e-14	Rask_block_34,40,55,0.014	Rask_block_9,64,89,2.9e-11	Rask_block_75,95,109,0.0026	Rask_block_245,112,121,0.00011	Rask_block_6,127,144,3.4e-11	Rask_block_23,175,197,2.6e-09	Rask_block_480,200,208,0.099	Rask_block_63,214,234,1.2e-11	Rask_block_67,250,262,6.6e-06	Rask_block_8,271,304,2.2e-17	Rask_block_441,305,315,1.5e-06	Rask_block_1,316,342,2.9e-10	Rask_block_32,357,397,3.7e-15	Rask_block_10,413,439,1.6e-08	Rask_block_26,466,478,0.00021
NS_L1_84_Contig9256_frame_2	Rask_block_13,15,36,5.6e-10	Rask_block_215,39,49,1.1e-05	Rask_block_3,51,67,2.8e-07	Rask_block_54,68,83,0.0029	Rask_block_14,86,108,3e-10	Rask_block_64,115,127,0.0016	Rask_block_5,129,146,4.6e-09	Rask_block_36,155,181,1.4e-09	Rask_block_163,185,191,0.0012
NS_L6_24_Contig8726_frame_-3	Rask_block_8,16,47,2e-16	Rask_block_1,58,83,2.3e-13	Rask_block_24,94,135,9.6e-20	Rask_block_10,142,168,1.1e-11	Rask_block_31,183,206,3.5e-06	Rask_block_127,211,237,1.4e-09	Rask_block_21,269,294,1.4e-10	Rask_block_41,296,314,0.00018
NS_L1_80_104167_frame_2	Rask_block_178,1,14,8.6e-07	Rask_block_6,16,40,7.6e-13	Rask_block_148,59,81,2.3e-13	Rask_block_22,84,103,1.1e-08	Rask_block_522,107,124,1.6e-07	Rask_block_8,127,158,3e-11	Rask_block_1,166,191,2.6e-11	Rask_block_24,203,242,3.9e-16	Rask_block_10,255,281,7.2e-10	Rask_block_224,283,293,0.00052	Rask_block_31,294,315,4.7e-06	Rask_block_56,319,337,0.0006	Rask_block_137,354,366,1.2e-06	Rask_block_21,381,403,2.6e-09
NS_L7_35_Contig6337_frame_1	Rask_block_20,69,88,2.7e-07	Rask_block_17,94,128,2.7e-10	Rask_block_19,130,163,1.2e-13	Rask_block_4,169,186,1.1e-08	Rask_block_13,195,216,7.7e-11	Rask_block_3,230,247,1.1e-07	Rask_block_14,260,281,3.2e-07	Rask_block_64,282,294,0.0072	Rask_block_5,296,315,3.9e-10	Rask_block_36,317,342,3.3e-12	Rask_block_88,345,351,0.002	Rask_block_2,352,367,3.8e-10
NS_L6_21_Contig12495_frame_2	Rask_block_1,1,19,1.4e-05	Rask_block_62,31,53,8.6e-07	Rask_block_61,58,82,4.6e-14	Rask_block_18,89,108,6.5e-05	Rask_block_15,122,142,0.00017	Rask_block_139,148,159,0.00035	Rask_block_4,161,178,1.8e-06	Rask_block_11,186,206,1.5e-10	Rask_block_3,232,248,1.9e-08	Rask_block_98,250,268,0.0011	Rask_block_5,280,299,7.3e-07	Rask_block_167,316,332,1.4e-07	Rask_block_2,333,350,4.1e-11	Rask_block_59,351,369,0.00016	Rask_block_579,375,390,8.4e-11	Rask_block_1,391,416,8.1e-11	Rask_block_45,432,471,1.8e-09	Rask_block_18,476,495,4.6e-07	Rask_block_355,499,523,2.6e-16	Rask_block_21,544,566,1.5e-10
S_L6_19_48730_frame_2	Rask_block_104,28,38,0.38	Rask_block_20,46,67,1.2e-08	Rask_block_17,70,104,1.4e-09	Rask_block_19,106,139,4e-13	Rask_block_4,145,162,2.3e-09	Rask_block_13,171,192,4.1e-11	Rask_block_3,206,223,6.3e-08
NS_L7_27_Contig6092_frame_-2	Rask_block_20,7,27,4.3e-08	Rask_block_17,34,64,4e-12	Rask_block_19,68,101,4.6e-14	Rask_block_4,108,125,8.8e-06	Rask_block_13,134,155,4.4e-11	Rask_block_3,169,186,1.8e-07	Rask_block_54,187,201,2.6e-05	Rask_block_14,204,227,0.00032	Rask_block_161,230,237,0.096	Rask_block_5,238,255,3.4e-10	Rask_block_36,261,286,1.2e-11	Rask_block_163,294,300,0.0025	Rask_block_2,301,318,4.5e-13	Rask_block_12,320,338,1.9e-07	Rask_block_7,342,366,1.2e-10
NS_L7_32_Contig11360_frame_2	Rask_block_1,15,40,9.2e-12	Rask_block_34,51,69,0.00051	Rask_block_9,76,102,3.4e-12	Rask_block_350,107,120,8.6e-06	Rask_block_6,124,148,6.2e-12	Rask_block_68,154,173,6.9e-06	Rask_block_23,179,198,0.044	Rask_block_63,218,235,6e-08	Rask_block_110,244,255,0.0068	Rask_block_67,261,273,1.4e-05	Rask_block_8,291,322,2.2e-14	Rask_block_1,332,357,9e-12	Rask_block_512,359,374,0.00029	Rask_block_32,380,416,2e-14	Rask_block_125,426,440,0.13	Rask_block_10,449,474,3.6e-07	Rask_block_26,503,519,3e-07	Rask_block_15,552,575,9.1e-07	Rask_block_35,581,590,0.00091	Rask_block_34,601,619,0.18	Rask_block_4,628,644,1.7e-06	Rask_block_106,664,678,0.00038	Rask_block_11,682,702,2.9e-10	Rask_block_158,709,722,0.21	Rask_block_16,732,747,0.00027	Rask_block_3,748,765,1.3e-09	Rask_block_253,767,773,0.1	Rask_block_27,776,795,6e-06	Rask_block_5,810,829,1.2e-11	Rask_block_55,838,857,5.4e-05	Rask_block_29,869,889,6.9e-05	Rask_block_2,907,923,2.2e-07
S_L7_42_69238_frame_3	Rask_block_55,12,30,9.6e-07	Rask_block_105,60,70,2.8e-05	Rask_block_2,71,87,1.5e-08	Rask_block_12,89,107,9.9e-06	Rask_block_7,108,130,3.1e-05	Rask_block_1,134,159,1.1e-07	Rask_block_72,160,175,1.3e-05	Rask_block_9,179,198,0.00027	Rask_block_6,215,230,2.2e-05
S_L8_68_Contig6801_frame_-1	Rask_block_4,3,20,3e-07	Rask_block_165,39,58,0.0043	Rask_block_11,61,80,5.6e-09	Rask_block_296,81,95,0.066	Rask_block_16,103,119,7.1e-08	Rask_block_3,120,136,2.2e-08	Rask_block_358,140,158,4.6e-14	Rask_block_27,164,184,2.3e-07	Rask_block_503,203,212,4.1e-05	Rask_block_5,214,232,1.1e-09	Rask_block_301,234,255,1.6e-05	Rask_block_29,266,285,1.7e-06	Rask_block_87,303,315,0.00059	Rask_block_2,316,333,1.3e-08
NS_L7_19_Contig9769_frame_-3	Rask_block_32,8,47,0.0044	Rask_block_10,59,86,4.8e-10	Rask_block_26,127,141,3.3e-05	Rask_block_30,156,179,0.0013	Rask_block_15,180,204,1e-08	Rask_block_35,207,220,1.8e-05	Rask_block_435,247,256,0.063	Rask_block_4,258,274,3.7e-06	Rask_block_11,300,320,3.9e-11	Rask_block_16,358,374,5.5e-07	Rask_block_3,375,391,2.2e-08	Rask_block_156,395,407,4e-05	Rask_block_27,411,431,0.0032	Rask_block_433,436,442,0.33	Rask_block_5,443,462,1.5e-10	Rask_block_29,493,514,1.6e-05	Rask_block_105,531,541,0.00041	Rask_block_2,542,556,0.00024
NS_L7_44_Contig10172_frame_-1	Rask_block_2,1,15,1.1e-08	Rask_block_59,16,36,2.2e-08	Rask_block_1,49,74,9.9e-08	Rask_block_62,90,110,8.9e-09	Rask_block_209,112,131,1.3e-08	Rask_block_61,134,159,9.1e-15	Rask_block_18,162,179,6.6e-08	Rask_block_49,186,204,0.0076	Rask_block_26,214,229,0.011
NS_L7_35_Contig5513_frame_2	Rask_block_441,16,21,0.16	Rask_block_1,22,47,2.1e-13	Rask_block_32,56,100,9.5e-15	Rask_block_168,101,113,0.015	Rask_block_10,121,148,2.4e-08	Rask_block_26,166,179,0.00046
S_L8_68_27917_frame_3	Rask_block_2,1,16,2.4e-07	Rask_block_12,17,35,0.00065	Rask_block_7,42,66,1.2e-08	Rask_block_1,68,93,2.3e-09	Rask_block_72,94,110,1.5e-06	Rask_block_9,112,132,0.003	Rask_block_6,146,171,8.4e-12	Rask_block_138,175,188,4.6e-06	Rask_block_50,201,219,1.1e-05	Rask_block_22,223,245,2e-14	Rask_block_159,247,257,0.00055
NS_L7_27_Contig7059_frame_2	Rask_block_1,2,25,3.4e-08	Rask_block_184,37,56,0.2	Rask_block_9,59,84,9.8e-13	Rask_block_75,88,104,0.00054	Rask_block_6,107,132,7.9e-15	Rask_block_68,136,155,3.9e-09	Rask_block_23,158,180,1.5e-08	Rask_block_208,181,192,1.5e-05	Rask_block_63,199,218,3.8e-10	Rask_block_114,223,237,8.2e-05	Rask_block_67,238,248,0.00059	Rask_block_8,254,288,5.7e-17	Rask_block_1,297,323,4.1e-11	Rask_block_292,324,341,1.7e-05	Rask_block_32,344,380,5.7e-13	Rask_block_10,392,419,7.8e-09	Rask_block_30,471,492,0.014	Rask_block_15,493,514,5.6e-05	Rask_block_35,519,533,0.00025	Rask_block_4,539,556,5.5e-06	Rask_block_165,571,589,9.2e-06	Rask_block_11,592,612,4.6e-10	Rask_block_289,614,633,0.00063	Rask_block_16,636,652,0.0006	Rask_block_3,653,670,3.1e-09	Rask_block_228,671,680,0.012	Rask_block_27,683,701,5.6e-05	Rask_block_5,714,733,2.5e-11	Rask_block_29,758,781,4.9e-06	Rask_block_170,793,806,0.0032	Rask_block_2,807,824,1e-07	Rask_block_12,825,844,8.2e-05	Rask_block_7,848,870,0.0032	Rask_block_1,874,899,8.1e-09	Rask_block_72,900,915,1.3e-05	Rask_block_9,917,940,8.4e-07	Rask_block_6,954,976,5.8e-13	Rask_block_180,979,993,0.0012	Rask_block_50,997,1024,6.7e-11	Rask_block_22,1027,1049,7.3e-14	Rask_block_417,1051,1059,0.0027	Rask_block_8,1064,1096,2.8e-18	Rask_block_445,1098,1105,0.00097	Rask_block_1,1106,1131,9e-13	Rask_block_24,1144,1184,8.2e-09	Rask_block_10,1192,1218,7.3e-11	Rask_block_31,1232,1251,9.5e-06	Rask_block_56,1253,1269,0.0018	Rask_block_205,1275,1285,0.011
S_L8_56_Contig6367_frame_-2	Rask_block_413,12,25,4.4e-09	Rask_block_6,27,50,7.7e-13	Rask_block_181,53,70,1.5e-07	Rask_block_23,73,96,3.7e-06	Rask_block_57,104,121,5.1e-07	Rask_block_116,126,138,6.8e-05	Rask_block_8,141,172,2.5e-14	Rask_block_1,182,207,9e-13	Rask_block_32,218,252,6.4e-07	Rask_block_535,253,262,0.067	Rask_block_10,266,292,1.8e-06	Rask_block_101,294,319,6.6e-10	Rask_block_52,323,338,0.00011	Rask_block_65,347,383,1.8e-19	Rask_block_53,389,409,3.8e-08	Rask_block_4,418,435,9.3e-09	Rask_block_189,436,450,1.9e-06	Rask_block_13,453,474,9.6e-09	Rask_block_3,481,498,2.5e-10	Rask_block_317,500,509,8.2e-05	Rask_block_14,511,524,0.011
S_L7_16_27170_frame_-1	Rask_block_61,18,43,3.4e-15	Rask_block_18,57,76,3.9e-08	Rask_block_15,91,114,3.2e-08	Rask_block_4,133,149,7.6e-07	Rask_block_11,159,179,4.2e-12	Rask_block_16,190,203,0.12	Rask_block_3,204,220,9e-08	Rask_block_86,222,242,8.8e-08	Rask_block_624,243,255,1.7e-08	Rask_block_5,256,275,6.7e-10	Rask_block_623,276,288,2.8e-09	Rask_block_94,295,315,6.8e-08	Rask_block_2,317,332,1e-09	Rask_block_59,334,350,0.00076	Rask_block_1,368,393,3.8e-11	Rask_block_62,402,423,3.3e-05	Rask_block_61,431,457,2.4e-11	Rask_block_18,466,484,5.7e-10	Rask_block_15,500,525,1.1e-06	Rask_block_139,528,540,0.16	Rask_block_4,544,558,2e-05	Rask_block_11,569,588,7e-08	Rask_block_16,591,606,0.0032	Rask_block_3,607,624,2e-10	Rask_block_82,627,649,1.6e-06	Rask_block_5,663,682,8.9e-08	Rask_block_90,683,696,9.1e-05	Rask_block_94,705,725,2.5e-07	Rask_block_2,726,743,1.3e-11	Rask_block_48,744,761,0.093	Rask_block_1,784,809,1.1e-09	Rask_block_45,819,844,0.0036
S_L7_20_Contig6584_frame_-2	Rask_block_12,1,15,0.011	Rask_block_7,19,44,1.3e-08	Rask_block_1,46,71,6.7e-12	Rask_block_70,75,96,4.6e-06	Rask_block_9,97,122,3.5e-09	Rask_block_118,124,138,4.7e-05	Rask_block_6,141,166,4e-16	Rask_block_438,167,185,1e-09	Rask_block_23,188,211,2.1e-08	Rask_block_57,226,245,3.3e-06	Rask_block_526,251,260,0.033	Rask_block_8,265,296,4.8e-12	Rask_block_1,305,330,1.9e-11	Rask_block_32,350,376,1.7e-06	Rask_block_10,389,414,0.00012	Rask_block_49,423,442,0.0035	Rask_block_26,461,475,9e-05	Rask_block_15,496,518,3.7e-07	Rask_block_35,521,536,6.5e-07	Rask_block_132,542,563,2.4e-06	Rask_block_4,564,581,2e-05	Rask_block_81,593,612,0.034	Rask_block_11,620,640,1.1e-11	Rask_block_77,642,657,3.6e-05	Rask_block_16,664,679,0.00015	Rask_block_3,680,695,1.1e-07	Rask_block_177,706,715,0.00096	Rask_block_27,717,736,0.001	Rask_block_5,752,770,2e-09	Rask_block_55,784,802,0.00062	Rask_block_448,804,811,0.012	Rask_block_29,815,836,1.7e-06	Rask_block_105,852,862,7.7e-06	Rask_block_2,864,880,1.4e-07	Rask_block_12,881,898,0.0029	Rask_block_7,900,921,1e-06	Rask_block_1,925,950,5.8e-08	Rask_block_9,969,994,1e-07	Rask_block_496,997,1004,0.14	Rask_block_6,1005,1030,1.2e-11	Rask_block_180,1032,1046,3.1e-05
S_L7_16_Contig1649_frm3_orf8	Rask_block_264,11,30,3.8e-07	Rask_block_20,32,53,5.2e-05	Rask_block_17,56,95,1e-12	Rask_block_19,103,130,6.7e-11	Rask_block_4,140,155,6e-09	Rask_block_13,166,187,2.7e-10	Rask_block_513,188,194,0.011	Rask_block_3,195,212,1.9e-07	Rask_block_219,213,223,9e-06	Rask_block_14,224,247,0.00011	Rask_block_179,250,258,0.00012	Rask_block_5,259,278,7.8e-09	Rask_block_60,288,313,2.7e-09	Rask_block_2,314,331,1.7e-11	Rask_block_12,332,348,7e-05	Rask_block_7,352,377,4.1e-11	Rask_block_1,379,404,6.9e-07	Rask_block_70,405,429,1.5e-05	Rask_block_9,430,456,7.2e-11	Rask_block_536,459,469,4.1e-06	Rask_block_6,472,496,1.1e-13	Rask_block_150,501,519,2.9e-08	Rask_block_23,521,544,2.8e-11	Rask_block_57,555,574,8.5e-09	Rask_block_8,585,618,3.2e-16	Rask_block_1,626,651,2.5e-09	Rask_block_121,656,695,2e-22
S_L8_68_Contig6802_frame_-1	Rask_block_12,1,14,0.017	Rask_block_7,17,41,9.6e-10	Rask_block_1,44,69,8.6e-13	Rask_block_239,72,80,0.24	Rask_block_184,83,100,2e-06	Rask_block_9,104,130,6.8e-15	Rask_block_75,133,149,1.1e-08	Rask_block_6,154,178,7.7e-16	Rask_block_68,181,201,6.5e-07	Rask_block_23,202,225,2.6e-10	Rask_block_104,226,235,0.0083	Rask_block_63,244,264,3.3e-11	Rask_block_67,282,294,5.3e-07	Rask_block_8,307,338,3.7e-15
NS_L8_59_Contig5532_frame_2	Rask_block_8,1,23,1.3e-09	Rask_block_1,32,57,1.7e-11	Rask_block_121,62,101,1.6e-23	Rask_block_368,103,116,1e-07	Rask_block_10,117,144,3.1e-09	Rask_block_141,145,162,8.4e-08	Rask_block_52,166,183,5.4e-05	Rask_block_65,188,222,2.6e-18	Rask_block_53,229,247,1.6e-05
NS_L8_50_Contig5466_frame_2	Rask_block_5,1,12,0.00078	Rask_block_213,13,29,0.14	Rask_block_2,31,47,1.6e-11	Rask_block_48,49,68,0.0013	Rask_block_1,78,98,0.00091	Rask_block_45,112,135,3.3e-10	Rask_block_78,140,161,2.7e-13	Rask_block_529,162,183,1.1e-09	Rask_block_28,187,195,0.0018
NS_L7_27_Contig6996_frame_-1	Rask_block_8,1,19,0.00019	Rask_block_1,28,52,1.3e-09	Rask_block_24,64,105,2.2e-18	Rask_block_10,117,140,1.8e-07	Rask_block_31,157,174,6.9e-07	Rask_block_127,178,203,3.4e-12	Rask_block_137,235,247,3.7e-07	Rask_block_28,249,257,0.18	Rask_block_21,266,289,1.1e-11
NS_L7_29_Contig7906_frame_3	Rask_block_8,1,24,1.3e-09	Rask_block_1,33,58,3.7e-12	Rask_block_32,66,103,4.2e-13	Rask_block_125,116,126,0.0086	Rask_block_10,129,156,4.3e-07	Rask_block_49,159,175,0.096	Rask_block_26,195,210,2.4e-07
NS_L7_32_Contig9247_frm3_orf5	Rask_block_20,28,49,6.2e-07	Rask_block_17,53,92,5.2e-10	Rask_block_19,99,128,3.1e-12	Rask_block_4,138,152,8.8e-07	Rask_block_13,163,184,1e-10	Rask_block_513,185,191,0.0098	Rask_block_3,192,209,1.7e-07	Rask_block_486,210,217,0.0009	Rask_block_14,219,242,9.4e-07	Rask_block_179,245,252,0.038	Rask_block_5,253,271,1.7e-08	Rask_block_60,282,306,4.8e-10	Rask_block_2,307,324,2.1e-11	Rask_block_12,325,344,1.8e-07	Rask_block_7,345,370,7.7e-11	Rask_block_1,372,397,9.8e-07	Rask_block_9,423,449,5.2e-10	Rask_block_379,454,460,0.071	Rask_block_6,463,488,2.8e-14	Rask_block_150,492,508,3.7e-06	Rask_block_23,512,535,2.4e-08	Rask_block_57,546,564,3e-08	Rask_block_8,579,608,2.9e-10	Rask_block_1,619,644,9.3e-11
S_L8_56_33605_frm2_orf0	Rask_block_1,12,37,8.5e-10	Rask_block_239,40,48,0.00021	Rask_block_34,51,69,0.00025	Rask_block_9,73,99,4.3e-14	Rask_block_348,100,120,3.3e-12	Rask_block_6,121,146,6.3e-13	Rask_block_68,147,167,8.3e-07	Rask_block_23,168,191,3.1e-07	Rask_block_104,192,200,0.0048	Rask_block_63,213,231,8.5e-11	Rask_block_288,235,247,2.1e-06	Rask_block_67,248,260,1.6e-06	Rask_block_8,276,307,1.7e-16	Rask_block_1,317,342,8.8e-14	Rask_block_32,351,389,9.1e-16
NS_L8_65_Contig5585_frame_2	Rask_block_8,1,34,1.3e-16	Rask_block_1,43,68,1.2e-11	Rask_block_32,83,130,2.2e-12	Rask_block_10,149,176,2.5e-07	Rask_block_26,211,227,4e-06	Rask_block_30,240,266,0.00082	Rask_block_15,267,289,2e-05	Rask_block_35,292,308,5.1e-07	Rask_block_132,311,331,0.027	Rask_block_4,332,349,4.8e-06	Rask_block_81,408,422,0.33	Rask_block_11,423,443,2.1e-12	Rask_block_77,444,461,0.00046	Rask_block_16,468,483,4.8e-06	Rask_block_3,484,500,1.2e-07	Rask_block_156,504,516,9e-06	Rask_block_27,522,539,0.00088	Rask_block_5,571,590,1.5e-11	Rask_block_249,591,607,5.3e-06	Rask_block_29,613,633,7.3e-05	Rask_block_87,642,656,0.00047	Rask_block_2,657,674,6.9e-08	Rask_block_7,694,718,7.6e-07	Rask_block_1,720,745,1.1e-08	Rask_block_72,746,762,1.9e-06	Rask_block_9,768,790,0.00097	Rask_block_443,791,804,1.6e-07	Rask_block_6,805,830,8.2e-12	Rask_block_138,831,843,0.0021	Rask_block_50,854,875,7.3e-07	Rask_block_22,878,900,2.7e-12	Rask_block_172,902,913,0.042	Rask_block_8,917,949,6.5e-15	Rask_block_1,954,977,1.5e-06	Rask_block_24,990,1030,1.8e-14	Rask_block_10,1042,1064,1.9e-07	Rask_block_31,1082,1099,3.1e-06	Rask_block_127,1102,1124,1.8e-09	Rask_block_33,1144,1160,0.096	Rask_block_21,1165,1189,1.5e-11
NS_L1_95_Contig3432_frame_1	Rask_block_1,10,35,6.5e-09	Rask_block_62,53,75,1.7e-06	Rask_block_61,81,106,4.7e-13	Rask_block_18,110,128,6.5e-09	Rask_block_15,144,169,5.4e-06	Rask_block_74,171,184,0.0011	Rask_block_4,188,203,1.1e-06	Rask_block_11,215,234,2.3e-09	Rask_block_16,236,250,0.13	Rask_block_3,253,270,1.9e-10	Rask_block_82,273,295,9.7e-05	Rask_block_5,310,323,2.6e-05
S_L7_20_Contig6489_frame_-2	Rask_block_8,4,37,1e-17	Rask_block_1,48,71,3.6e-10	Rask_block_456,73,82,7.6e-06	Rask_block_24,83,124,5e-19	Rask_block_10,133,157,4.4e-10	Rask_block_31,176,196,0.00092	Rask_block_56,197,216,8.6e-05	Rask_block_30,231,257,2e-05	Rask_block_366,272,281,0.0015	Rask_block_21,284,304,8.9e-10
NS_L1_95_Contig8063_frame_2	Rask_block_6,5,28,3e-11	Rask_block_148,52,87,0.0016	Rask_block_22,91,112,1.8e-11	Rask_block_8,130,162,6.9e-12	Rask_block_1,170,195,3.2e-11	Rask_block_24,208,246,2.3e-13	Rask_block_10,260,284,1.7e-07	Rask_block_76,341,378,1e-13	Rask_block_4,384,398,0.00027	Rask_block_11,411,430,9.4e-05	Rask_block_3,437,454,2.1e-07	Rask_block_126,456,472,0.00018	Rask_block_5,492,508,1.4e-07	Rask_block_213,509,525,1.3e-05	Rask_block_2,527,544,3.5e-07	Rask_block_200,545,604,2.1e-25	Rask_block_97,614,632,0.007	Rask_block_274,634,665,7.4e-17	Rask_block_21,724,749,6.9e-12
NS_L6_18_Contig14587_frame_-3	Rask_block_26,9,21,0.00027	Rask_block_15,56,79,6.2e-06	Rask_block_4,104,118,0.00021	Rask_block_11,129,149,1.4e-09	Rask_block_77,150,166,1.7e-06
NS_L8_50_Contig5424_frame_3	Rask_block_35,7,22,1e-06	Rask_block_4,37,54,9e-06	Rask_block_81,68,80,0.047	Rask_block_11,91,111,8.9e-11	Rask_block_16,130,143,4.5e-05	Rask_block_3,146,161,1.9e-07	Rask_block_27,181,201,0.00011	Rask_block_5,217,236,4.6e-11	Rask_block_55,240,258,0.00013	Rask_block_29,279,301,2.5e-06	Rask_block_87,305,315,0.14	Rask_block_2,316,333,6e-08	Rask_block_12,334,351,8.1e-05	Rask_block_7,358,383,2.4e-07	Rask_block_1,385,410,3.8e-10	Rask_block_72,411,427,4.8e-07	Rask_block_9,433,456,1.7e-07	Rask_block_6,475,499,9.6e-11	Rask_block_50,522,549,1.3e-06	Rask_block_22,552,574,5.2e-14	Rask_block_8,590,623,5.2e-18	Rask_block_1,632,657,4.5e-12	Rask_block_24,666,706,3.5e-18	Rask_block_10,715,741,8e-13	Rask_block_31,752,770,2.3e-05	Rask_block_56,772,791,0.0029	Rask_block_33,825,839,0.037	Rask_block_21,854,878,2.1e-11
NS_L1_73_Contig29054_frame_-3	Rask_block_23,9,32,3.9e-09	Rask_block_57,42,60,1.1e-07	Rask_block_8,72,105,4.9e-13	Rask_block_1,113,138,5e-14	Rask_block_32,149,185,2.2e-11	Rask_block_10,199,225,4.9e-08
NS_L7_32_Contig14761_frm1_orf10	Rask_block_12,60,78,1.3e-06	Rask_block_7,81,106,5.4e-10	Rask_block_1,108,133,6.5e-12	Rask_block_34,141,159,1.2e-05	Rask_block_9,166,194,2.1e-12	Rask_block_75,197,213,1.8e-06	Rask_block_245,214,223,0.0002	Rask_block_6,229,251,4.7e-14	Rask_block_68,254,273,1.2e-08	Rask_block_23,275,298,2.2e-10	Rask_block_104,301,311,0.0098	Rask_block_63,319,339,1.8e-10	Rask_block_67,358,370,3.6e-06	Rask_block_316,372,382,4e-06	Rask_block_8,384,417,3.5e-18	Rask_block_441,418,428,1.3e-06	Rask_block_1,429,445,8.5e-07
S_L8_56_33637_frame_1	Rask_block_17,27,67,1.3e-10	Rask_block_19,72,103,1e-10	Rask_block_4,112,129,1.2e-07	Rask_block_13,138,159,4.3e-09	Rask_block_3,168,184,7.2e-06	Rask_block_219,185,194,0.0044	Rask_block_14,196,219,9.2e-06	Rask_block_179,221,229,0.00081	Rask_block_5,230,248,4.6e-08	Rask_block_60,260,284,1.6e-11	Rask_block_2,285,302,4.2e-11	Rask_block_12,304,320,0.038	Rask_block_7,323,348,3.6e-12	Rask_block_1,350,375,1.4e-07	Rask_block_9,394,422,7.4e-10	Rask_block_6,434,455,3.3e-08	Rask_block_8,540,571,4.3e-14	Rask_block_1,582,607,2.6e-11	Rask_block_24,619,657,0.00062	Rask_block_10,670,695,1.5e-05	Rask_block_52,732,748,0.096	Rask_block_65,753,786,6.4e-11	Rask_block_28,790,799,0.081	Rask_block_26,827,842,5.4e-05	Rask_block_30,849,874,0.00033	Rask_block_15,891,915,2.7e-05	Rask_block_74,921,934,0.00031	Rask_block_4,937,954,2.6e-08	Rask_block_11,963,983,1.9e-12	Rask_block_16,989,1004,5e-06	Rask_block_3,1005,1021,2.7e-07	Rask_block_86,1023,1046,7.8e-08	Rask_block_5,1057,1076,1.4e-07	Rask_block_90,1077,1090,0.15	Rask_block_94,1100,1117,0.00019	Rask_block_2,1119,1135,1.9e-10	Rask_block_136,1138,1160,7.8e-09	Rask_block_1,1167,1192,3.6e-09	Rask_block_45,1203,1230,1.2e-09	Rask_block_78,1235,1256,2.6e-08	Rask_block_15,1260,1284,2.3e-06	Rask_block_4,1305,1321,8.5e-06	Rask_block_11,1331,1351,3.9e-10	Rask_block_16,1371,1386,0.0014	Rask_block_3,1387,1404,1.3e-09	Rask_block_27,1410,1428,0.18	Rask_block_5,1441,1460,1.3e-09	Rask_block_90,1461,1475,0.0019	Rask_block_29,1478,1494,0.00051
S_L7_20_Contig19_frame_-3	Rask_block_5,19,38,1.6e-11	Rask_block_90,39,52,0.015	Rask_block_29,58,78,8.7e-06	Rask_block_409,83,93,0.008	Rask_block_2,94,111,9.7e-10	Rask_block_12,112,130,1.4e-06	Rask_block_7,133,158,5.9e-09	Rask_block_1,160,176,1.7e-05
NS_L7_35_Contig6343_frm-3_orf3	Rask_block_20,23,45,3.5e-09	Rask_block_17,50,80,7.8e-09	Rask_block_19,83,117,3.3e-10	Rask_block_4,122,139,1.5e-06	Rask_block_13,149,170,1.3e-09	Rask_block_135,171,183,2.2e-07	Rask_block_3,185,201,5.8e-07	Rask_block_54,202,216,1e-05	Rask_block_64,241,254,3.9e-05	Rask_block_5,256,274,3.3e-09	Rask_block_36,279,304,2e-10	Rask_block_163,312,318,0.0021	Rask_block_2,319,334,3.4e-10
NS_L7_44_Contig6045_frame_-2	Rask_block_136,1,21,3.3e-07	Rask_block_1,26,51,3.5e-06	Rask_block_45,62,89,1.1e-10	Rask_block_78,94,115,6.7e-11	Rask_block_15,119,143,4.4e-07	Rask_block_585,149,164,7.3e-05	Rask_block_4,165,181,3e-07	Rask_block_11,190,210,6e-10	Rask_block_77,211,223,0.22	Rask_block_16,230,244,0.0015
NS_L6_18_Contig7677_frame_1	Rask_block_18,1,12,0.0026	Rask_block_124,16,30,3.3e-07	Rask_block_76,31,67,1.1e-14	Rask_block_4,68,83,1.1e-06	Rask_block_475,86,94,1.2e-05	Rask_block_11,95,115,5.2e-05	Rask_block_3,123,138,3.5e-08	Rask_block_126,140,155,1.7e-08	Rask_block_5,164,181,1e-09
S_L7_20_53118_frame_3	Rask_block_9,1,13,0.012	Rask_block_6,29,52,4.1e-14	Rask_block_150,55,73,0.032	Rask_block_23,77,93,2.4e-05	Rask_block_57,109,128,1.1e-10	Rask_block_8,140,172,2.2e-15	Rask_block_1,181,204,1.1e-08	Rask_block_121,211,229,1.4e-07
NS_L1_84_42818_frame_1	Rask_block_83,8,20,1.6e-05	Rask_block_8,22,57,8.4e-14	Rask_block_1,66,90,5.1e-07	Rask_block_24,101,144,4e-16	Rask_block_10,153,180,1.8e-13	Rask_block_543,181,190,0.009	Rask_block_31,193,209,0.00036	Rask_block_56,214,230,8.9e-05	Rask_block_28,244,253,0.15
S_L3_13_Contig2295_frame_1	Rask_block_8,8,39,3.2e-15	Rask_block_1,49,74,2.1e-12	Rask_block_24,83,124,7.4e-13	Rask_block_10,133,157,2.9e-08	Rask_block_31,173,191,0.0049	Rask_block_56,195,214,0.051	Rask_block_593,240,257,0.039	Rask_block_33,288,304,0.038	Rask_block_21,315,339,1.2e-10	Rask_block_41,341,359,0.0013
NS_L1_73_Contig37677_frame_2	Rask_block_73,6,21,0.083	Rask_block_11,27,47,7.6e-10	Rask_block_158,48,63,1.4e-07	Rask_block_16,76,91,4.2e-05	Rask_block_3,92,109,9.1e-09	Rask_block_27,127,146,0.0083	Rask_block_5,157,176,5.7e-10	Rask_block_55,184,201,0.015	Rask_block_29,215,232,9.4e-06	Rask_block_198,236,244,0.089	Rask_block_2,246,262,5.4e-08	Rask_block_12,263,282,0.22	Rask_block_7,289,314,1.1e-08	Rask_block_1,316,341,6.5e-10	Rask_block_72,343,357,2.1e-05	Rask_block_9,359,384,9.8e-10	Rask_block_6,404,429,5.3e-13	Rask_block_138,430,441,2.1e-05	Rask_block_50,448,475,3.2e-11
NS_L6_24_Contig5933_frame_3	Rask_block_2,1,14,4.3e-08	Rask_block_12,15,32,1.1e-06	Rask_block_7,39,63,5.8e-11	Rask_block_1,66,91,5.4e-08	Rask_block_34,105,124,0.022	Rask_block_9,128,152,1.8e-07	Rask_block_118,154,168,1.8e-06	Rask_block_6,171,196,6.8e-11	Rask_block_68,199,219,3.2e-06	Rask_block_23,220,243,2.4e-08	Rask_block_63,265,285,3.2e-09	Rask_block_110,288,302,0.044	Rask_block_67,303,315,2.1e-05	Rask_block_8,332,365,4.1e-16	Rask_block_1,374,399,1.2e-11	Rask_block_32,414,457,2.7e-14	Rask_block_125,465,475,0.22	Rask_block_10,476,502,4.8e-08	Rask_block_26,529,544,0.031	Rask_block_332,562,577,0.00016	Rask_block_15,578,598,0.0089	Rask_block_35,601,618,2.1e-05	Rask_block_4,648,665,1.3e-05	Rask_block_81,677,697,0.0072	Rask_block_11,698,718,9.4e-10	Rask_block_77,719,735,0.054	Rask_block_16,766,782,0.0016	Rask_block_3,783,800,2.6e-09	Rask_block_228,801,813,0.00013	Rask_block_27,815,831,0.034	Rask_block_561,837,846,0.00024	Rask_block_5,849,867,1.1e-09	Rask_block_55,873,890,0.0002	Rask_block_29,903,923,5.9e-07	Rask_block_105,931,941,0.00024	Rask_block_2,942,958,1.1e-07	Rask_block_12,960,976,0.0097	Rask_block_7,980,1002,0.0019	Rask_block_1,1006,1031,5.8e-08	Rask_block_72,1032,1048,0.0022	Rask_block_9,1052,1072,0.0025	Rask_block_6,1085,1110,6.5e-12	Rask_block_173,1113,1127,2.9e-05	Rask_block_50,1133,1161,4.8e-09	Rask_block_22,1164,1186,7.9e-13	Rask_block_172,1188,1200,0.00089	Rask_block_8,1204,1237,3.8e-17	Rask_block_1,1245,1265,1.7e-06	Rask_block_24,1276,1317,1.1e-15
NS_L6_18_Contig9047_frm-3_orf12	Rask_block_3,11,28,7.6e-10	Rask_block_544,30,39,8.8e-05
S_L3_13_Contig6052_frame_-2	Rask_block_5,13,31,3.2e-09	Rask_block_36,34,62,4.5e-13	Rask_block_163,70,76,0.01	Rask_block_2,77,94,4.8e-12	Rask_block_12,95,114,1.5e-08	Rask_block_7,118,143,3e-09	Rask_block_1,145,170,1e-08	Rask_block_34,184,203,1.5e-06	Rask_block_9,207,232,6e-09	Rask_block_118,233,247,1.3e-07	Rask_block_6,250,273,1.3e-11	Rask_block_68,277,296,2.6e-06	Rask_block_23,298,321,1.5e-08	Rask_block_63,338,357,8.8e-11	Rask_block_110,362,376,1e-05	Rask_block_67,377,389,1.2e-05	Rask_block_8,395,429,3.3e-16	Rask_block_1,440,465,1.4e-13	Rask_block_299,474,483,0.063	Rask_block_32,489,525,1.7e-11	Rask_block_10,541,568,8.4e-08	Rask_block_26,593,604,0.029	Rask_block_30,624,648,0.31	Rask_block_15,651,673,5.1e-06	Rask_block_35,677,693,7.3e-09	Rask_block_4,719,735,1e-05	Rask_block_11,749,769,2e-09	Rask_block_16,804,820,0.00026	Rask_block_3,821,837,1.1e-07	Rask_block_156,841,853,4.7e-05	Rask_block_27,854,873,0.04	Rask_block_5,890,908,1.2e-07	Rask_block_55,913,932,6.1e-07	Rask_block_29,943,964,1.8e-06	Rask_block_105,970,980,0.00021	Rask_block_2,983,997,2.7e-07	Rask_block_12,999,1015,0.11	Rask_block_7,1018,1042,7.8e-05	Rask_block_1,1044,1069,1.1e-08	Rask_block_9,1082,1104,0.00011	Rask_block_6,1118,1141,3.9e-10	Rask_block_138,1144,1158,5.6e-05	Rask_block_50,1162,1189,1e-12	Rask_block_22,1192,1214,1.4e-13	Rask_block_8,1230,1263,9.5e-15	Rask_block_1,1272,1297,2.7e-12	Rask_block_24,1308,1349,8.2e-11	Rask_block_10,1358,1372,0.00019
NS_L6_21_Contig11171_frame_2	Rask_block_79,9,24,2.4e-09	Rask_block_14,25,45,0.00019	Rask_block_64,48,61,0.00027	Rask_block_5,63,82,2e-10	Rask_block_36,84,112,7.1e-13	Rask_block_493,114,120,0.11	Rask_block_153,122,128,0.0023	Rask_block_2,129,146,4.1e-13	Rask_block_12,148,166,5.5e-07	Rask_block_7,170,194,1.1e-06	Rask_block_1,197,222,1.9e-10	Rask_block_492,225,232,0.00085	Rask_block_34,238,255,0.00064	Rask_block_9,259,285,1.3e-13	Rask_block_75,289,304,7.4e-05	Rask_block_6,309,334,3.8e-15	Rask_block_143,338,354,3.7e-09
S_L7_20_Contig5132_frame_3	Rask_block_3,14,31,6.1e-07	Rask_block_54,32,46,0.076	Rask_block_14,49,68,0.0033	Rask_block_5,76,95,3e-09	Rask_block_60,105,129,1.1e-11	Rask_block_2,130,147,4.6e-12	Rask_block_12,148,166,0.00011	Rask_block_7,168,193,4.9e-08	Rask_block_1,195,220,2e-10	Rask_block_70,222,244,6.5e-06	Rask_block_9,246,272,2e-08	Rask_block_399,275,286,8e-05	Rask_block_6,287,311,4.2e-10	Rask_block_150,316,334,1e-06	Rask_block_23,336,358,4e-05	Rask_block_57,370,388,9e-07	Rask_block_8,399,432,2.9e-13	Rask_block_1,441,464,3.8e-10	Rask_block_121,471,509,6.3e-20	Rask_block_368,511,524,0.0035	Rask_block_10,527,551,0.0001	Rask_block_141,553,570,3e-08	Rask_block_52,572,589,0.24	Rask_block_65,594,628,3.9e-14	Rask_block_4,666,683,4.3e-08	Rask_block_13,698,718,5.7e-09	Rask_block_3,726,743,6.4e-09	Rask_block_174,744,754,0.00013	Rask_block_14,756,779,7.6e-06	Rask_block_5,790,809,8.6e-10	Rask_block_187,812,824,1.3e-07	Rask_block_2,825,842,1.9e-10	Rask_block_59,843,862,2.7e-09	Rask_block_1,877,902,7.7e-09	Rask_block_614,904,917,3.8e-06	Rask_block_62,921,942,0.00012	Rask_block_61,964,989,7.6e-12	Rask_block_18,994,1012,7.7e-06	Rask_block_190,1026,1041,1.9e-05	Rask_block_26,1076,1092,0.0023	Rask_block_15,1114,1139,1.1e-06	Rask_block_74,1145,1159,0.037	Rask_block_4,1162,1178,5.9e-06	Rask_block_11,1189,1208,2.6e-07	Rask_block_16,1210,1226,0.0015	Rask_block_3,1227,1244,5.3e-10	Rask_block_5,1272,1290,1.5e-09	Rask_block_55,1296,1314,2.6e-05	Rask_block_29,1315,1336,2.3e-05
NS_L1_95_Contig3422_frm-1_orf0	Rask_block_10,14,40,3.1e-10	Rask_block_31,57,77,5.3e-06	Rask_block_127,81,107,5.1e-13	Rask_block_137,118,129,1.9e-06	Rask_block_33,146,164,0.00065	Rask_block_21,171,195,1.4e-10
NS_L1_95_Contig8962_frame_3	Rask_block_8,15,47,4.1e-16	Rask_block_1,52,75,2.6e-08	Rask_block_24,86,127,4.3e-15	Rask_block_10,135,161,4.3e-12	Rask_block_195,165,176,0.0047	Rask_block_31,180,196,4.5e-05	Rask_block_56,200,218,0.0003	Rask_block_137,228,239,3.4e-06	Rask_block_21,280,304,7.4e-10	Rask_block_418,305,314,5.2e-06	Rask_block_182,347,356,0.026	Rask_block_182,366,375,0.00029
NS_L8_50_Contig7608_frm-1_orf0	Rask_block_20,7,27,4.2e-07	Rask_block_17,31,65,1.1e-07	Rask_block_19,71,102,3.8e-14	Rask_block_4,108,125,1.7e-06	Rask_block_13,134,155,7e-11	Rask_block_616,157,166,6.5e-05	Rask_block_3,167,184,5e-08	Rask_block_204,185,195,2.3e-06	Rask_block_14,198,214,9.8e-05	Rask_block_5,225,243,6.7e-11	Rask_block_60,257,277,1.3e-06	Rask_block_2,278,295,3.5e-13
NS_L7_32_Contig13379_frame_3	Rask_block_396,16,31,9.2e-07	Rask_block_61,34,59,1.6e-13	Rask_block_18,65,81,3.1e-06	Rask_block_15,100,125,2.9e-07	Rask_block_74,131,137,0.019	Rask_block_4,147,164,5.3e-08	Rask_block_11,173,193,1.6e-12	Rask_block_16,207,217,0.13	Rask_block_3,218,234,7.3e-09	Rask_block_27,238,258,1.9e-05	Rask_block_5,267,285,6.6e-09
NS_L8_65_Contig5064_frame_-3	Rask_block_16,2,18,1.2e-06	Rask_block_3,19,36,8.7e-10	Rask_block_82,39,60,0.0013	Rask_block_5,78,97,8.6e-10	Rask_block_55,104,123,1.4e-05	Rask_block_29,127,150,5e-06	Rask_block_2,167,183,1.3e-08
S_L3_13_Contig7237_frame_3	Rask_block_3,11,28,4.6e-10	Rask_block_14,40,60,0.0081	Rask_block_5,71,88,3.8e-09	Rask_block_589,95,107,8.1e-05	Rask_block_2,108,125,5.6e-10	Rask_block_59,126,144,5.4e-07	Rask_block_1,159,184,6.5e-10	Rask_block_119,185,197,0.024	Rask_block_62,201,221,3.8e-07	Rask_block_209,225,242,3.1e-06	Rask_block_61,243,268,1.1e-13	Rask_block_18,284,302,1.4e-07	Rask_block_15,320,342,2.1e-07	Rask_block_35,344,360,2.6e-07	Rask_block_4,368,385,2e-05	Rask_block_453,396,407,0.032	Rask_block_106,411,425,0.00055	Rask_block_11,428,448,1.2e-10	Rask_block_16,478,492,0.00089	Rask_block_3,494,511,5.2e-08	Rask_block_27,521,541,0.06	Rask_block_433,547,557,6.1e-05	Rask_block_5,558,577,5.5e-11	Rask_block_55,584,601,0.024	Rask_block_29,604,626,4.2e-07	Rask_block_2,647,662,9.9e-07	Rask_block_7,686,709,1.9e-06	Rask_block_1,712,737,4.1e-11	Rask_block_9,752,769,0.0012	Rask_block_6,787,811,2.7e-11	Rask_block_138,815,829,0.0055	Rask_block_50,833,860,2e-07	Rask_block_22,863,885,1.7e-12	Rask_block_172,887,897,0.00049	Rask_block_8,901,933,4.9e-13	Rask_block_1,938,961,2e-07	Rask_block_24,972,1012,1.2e-15	Rask_block_10,1020,1045,1.5e-11	Rask_block_271,1056,1065,2.2e-05	Rask_block_31,1066,1086,8.7e-07	Rask_block_56,1092,1109,0.0059	Rask_block_205,1113,1120,0.16	Rask_block_28,1158,1169,0.0011	Rask_block_21,1172,1187,0.0023
NS_L8_54_Contig10457_frame_-2	Rask_block_1,9,34,4.8e-11	Rask_block_492,35,44,5.9e-06	Rask_block_34,45,64,0.00011	Rask_block_9,68,94,4.8e-10	Rask_block_75,98,114,2.6e-08	Rask_block_245,127,134,0.01	Rask_block_6,137,162,9.1e-15	Rask_block_68,166,186,1.7e-07	Rask_block_23,187,210,1.2e-08	Rask_block_104,211,219,0.097	Rask_block_63,231,250,4.1e-11	Rask_block_110,257,268,0.097	Rask_block_67,274,286,1.8e-05
NS_L1_95_Contig7974_frame_3	Rask_block_85,5,24,1.7e-08	Rask_block_22,33,54,3.1e-10	Rask_block_83,58,70,3.8e-05	Rask_block_8,72,107,5.3e-12	Rask_block_1,116,140,1e-07	Rask_block_24,153,193,2.9e-13	Rask_block_10,195,217,4e-09
S_L8_56_33595_frame_-3	Rask_block_1,7,32,2e-10	Rask_block_70,33,62,3.7e-10	Rask_block_9,63,89,2.9e-12	Rask_block_350,94,107,0.017	Rask_block_6,110,135,1.1e-13	Rask_block_68,140,160,8.4e-06	Rask_block_23,161,184,8.5e-10	Rask_block_63,202,219,4e-07	Rask_block_339,226,239,0.0082	Rask_block_67,241,252,9.9e-05	Rask_block_8,263,294,2.4e-13	Rask_block_1,304,329,3.1e-13	Rask_block_32,350,388,1.2e-14	Rask_block_240,396,405,0.057	Rask_block_10,406,433,3e-09	Rask_block_26,458,469,0.19	Rask_block_30,491,517,0.018	Rask_block_15,518,539,5.9e-06	Rask_block_35,544,559,2.4e-06	Rask_block_4,561,578,3.5e-06	Rask_block_11,608,628,2e-10	Rask_block_296,633,647,0.07	Rask_block_16,663,680,3e-05	Rask_block_3,681,698,2.3e-09	Rask_block_82,709,726,0.0012	Rask_block_5,739,758,1.7e-07	Rask_block_301,760,778,3.7e-07	Rask_block_29,783,799,0.051	Rask_block_2,826,842,1.8e-06	Rask_block_12,843,858,1.5e-05	Rask_block_7,861,885,4.1e-08	Rask_block_1,887,912,2e-09	Rask_block_497,918,926,0.075	Rask_block_9,932,952,2.4e-05	Rask_block_6,966,988,7.4e-13	Rask_block_50,1009,1036,4.3e-10	Rask_block_22,1040,1061,8.3e-07	Rask_block_172,1064,1076,9.3e-06	Rask_block_8,1079,1111,4.5e-13	Rask_block_1,1116,1139,1.6e-06	Rask_block_24,1151,1191,7.5e-16	Rask_block_10,1202,1221,0.00057	Rask_block_31,1250,1271,1.6e-06
S_L6_19_Contig12451_frame_-2	Rask_block_6,7,30,9.3e-15	Rask_block_68,37,56,2.6e-05	Rask_block_23,58,80,1.9e-08	Rask_block_63,88,105,8.7e-08	Rask_block_114,106,121,0.00013	Rask_block_67,123,135,7.5e-06	Rask_block_8,149,182,9.1e-18	Rask_block_1,194,219,8.3e-10	Rask_block_32,228,271,6.2e-12	Rask_block_168,272,284,0.00072	Rask_block_10,300,327,2.5e-08	Rask_block_49,331,350,1.9e-05	Rask_block_26,351,363,0.00083	Rask_block_30,381,392,0.12	Rask_block_33,464,483,0.027	Rask_block_21,493,517,6.6e-09	Rask_block_41,519,569,7.1e-31	Rask_block_128,570,577,0.00071
NS_L7_19_Contig9601_frame_2	Rask_block_35,6,22,4.8e-06	Rask_block_4,53,70,1.7e-06	Rask_block_165,90,103,0.0022	Rask_block_11,105,125,4.3e-11	Rask_block_77,126,142,0.21	Rask_block_16,150,164,0.0037	Rask_block_3,165,180,5.9e-09
S_L6_19_Contig12460_frame_-2	Rask_block_1,10,35,2.4e-09	Rask_block_351,37,52,1.6e-08	Rask_block_115,53,67,0.0046	Rask_block_335,72,266,1.1e-107	Rask_block_4,269,284,0.018	Rask_block_13,301,321,0.0007	Rask_block_620,323,329,0.14	Rask_block_3,334,350,1.1e-06	Rask_block_325,351,361,2.4e-07	Rask_block_14,362,390,3.5e-06	Rask_block_5,397,416,5.6e-07	Rask_block_328,418,437,1.3e-07	Rask_block_2,439,455,3.5e-07	Rask_block_343,456,631,1e-99	Rask_block_18,633,651,0.00014	Rask_block_344,652,670,2e-15	Rask_block_342,687,775,6e-48	Rask_block_1,778,803,1.5e-09	Rask_block_329,812,945,5.8e-82	Rask_block_4,948,964,4.7e-05	Rask_block_307,967,1008,3.2e-31	Rask_block_484,1020,1040,5.5e-16	Rask_block_3,1041,1058,0.0012	Rask_block_314,1059,1093,1.2e-20	Rask_block_5,1097,1115,0.051	Rask_block_313,1118,1140,1e-17	Rask_block_2,1142,1158,2.4e-07	Rask_block_306,1159,1171,4e-09	Rask_block_428,1180,1195,9.7e-11	Rask_block_1,1196,1221,9e-12	Rask_block_305,1225,1314,1.3e-61	Rask_block_4,1317,1331,1.4e-05	Rask_block_401,1335,1348,0.17	Rask_block_11,1349,1369,0.018	Rask_block_431,1370,1381,1.1e-07	Rask_block_3,1382,1399,0.00053	Rask_block_311,1400,1437,1.8e-30	Rask_block_390,1438,1450,0.13	Rask_block_327,1457,1477,1.4e-14	Rask_block_326,1486,1498,1.2e-09	Rask_block_2,1501,1515,2.4e-07	Rask_block_304,1517,1545,4.6e-23	Rask_block_1,1546,1571,9.8e-07	Rask_block_310,1572,1702,8.1e-85	Rask_block_76,1708,1744,4.7e-14	Rask_block_4,1745,1758,0.00054	Rask_block_11,1772,1792,0.00014	Rask_block_586,1793,1806,5.3e-09	Rask_block_3,1807,1824,2.9e-05
NS_L7_32_Contig12622_frame_2	Rask_block_487,16,27,0.11	Rask_block_5,28,47,3.1e-11	Rask_block_249,48,66,1.5e-06	Rask_block_29,73,92,0.27	Rask_block_509,101,109,0.00094	Rask_block_2,110,126,5.3e-08	Rask_block_12,128,147,0.00017	Rask_block_7,148,170,0.00038	Rask_block_1,174,199,9.1e-11	Rask_block_9,212,236,9.4e-07	Rask_block_6,250,272,8.7e-10	Rask_block_180,276,290,0.00027	Rask_block_50,294,321,8.5e-09	Rask_block_22,325,347,5.3e-11	Rask_block_8,362,395,8.7e-17	Rask_block_1,400,423,4.2e-10	Rask_block_24,435,475,2.5e-15	Rask_block_10,483,510,1.4e-10	Rask_block_31,527,549,6e-06	Rask_block_56,552,570,0.094	Rask_block_205,573,586,6.6e-08	Rask_block_28,593,604,0.053	Rask_block_21,616,641,4.3e-10	Rask_block_182,723,732,0.1
NS_L1_95_Contig4499_frame_-3	Rask_block_352,25,134,4.3e-55	Rask_block_583,159,169,1.1e-06	Rask_block_11,170,190,0.00036	Rask_block_3,209,225,1.3e-07	Rask_block_260,227,252,1.6e-14	Rask_block_5,267,286,1.9e-09	Rask_block_380,304,326,2e-14	Rask_block_2,330,344,4.9e-09	Rask_block_48,350,365,0.0094	Rask_block_1,371,396,1.9e-10	Rask_block_45,409,442,1.3e-05	Rask_block_18,447,466,1.1e-07	Rask_block_308,520,528,0.035	Rask_block_308,541,550,0.062	Rask_block_15,561,585,1.8e-06	Rask_block_74,589,603,0.0002	Rask_block_4,606,623,1.4e-07	Rask_block_11,636,655,3.3e-08	Rask_block_3,674,691,8.6e-09	Rask_block_82,696,715,0.00095	Rask_block_5,730,745,9.2e-05	Rask_block_167,761,776,2.6e-06	Rask_block_2,777,794,1.7e-11	Rask_block_48,795,815,1.4e-07	Rask_block_1,821,846,3e-10	Rask_block_425,847,860,3.4e-09	Rask_block_45,865,895,9.7e-11	Rask_block_18,911,930,3.4e-06	Rask_block_318,938,1018,6.8e-37	Rask_block_4,1030,1047,1.6e-06	Rask_block_13,1057,1076,0.0013	Rask_block_3,1088,1105,1.9e-07	Rask_block_568,1106,1116,4.8e-05	Rask_block_5,1151,1169,2.5e-09	Rask_block_275,1172,1186,0.00032	Rask_block_92,1188,1205,2.2e-07	Rask_block_2,1206,1223,1.3e-09	Rask_block_99,1224,1256,2.9e-19	Rask_block_1,1258,1283,2e-07	Rask_block_62,1294,1316,0.0069	Rask_block_93,1322,1339,2.9e-07	Rask_block_18,1349,1367,2.8e-06	Rask_block_124,1370,1383,1.5e-05	Rask_block_76,1386,1422,9.7e-14	Rask_block_4,1423,1438,2.1e-05	Rask_block_3,1477,1493,2.1e-07	Rask_block_5,1528,1546,1.9e-08	Rask_block_142,1554,1568,5.3e-06	Rask_block_2,1570,1581,0.0003
S_L8_56_Contig6073_frame_1	Rask_block_61,41,66,1.4e-18	Rask_block_18,71,87,1.3e-06	Rask_block_15,117,141,4.8e-08	Rask_block_139,143,156,1.4e-05	Rask_block_4,158,168,6.5e-06
NS_L1_80_Contig23406_frame_-2	Rask_block_18,28,47,1.3e-06	Rask_block_28,60,64,0.24	Rask_block_28,96,105,0.19	Rask_block_30,157,177,0.21	Rask_block_15,181,200,0.00037	Rask_block_35,204,220,1.2e-07
NS_L8_54_Contig9641_frame_-2	Rask_block_4,7,24,7e-07	Rask_block_106,42,56,0.00015	Rask_block_11,60,80,5.8e-12	Rask_block_109,81,97,0.0043	Rask_block_16,106,121,6.4e-05	Rask_block_3,122,139,9.5e-10	Rask_block_27,152,170,0.00046	Rask_block_5,180,199,1.2e-10	Rask_block_55,211,227,5.1e-05	Rask_block_448,228,239,9.7e-05	Rask_block_29,251,272,5.1e-06	Rask_block_105,288,298,8.8e-06	Rask_block_2,299,315,6e-08	Rask_block_12,317,329,0.0065	Rask_block_7,336,360,6.9e-08	Rask_block_1,362,387,4.5e-11	Rask_block_72,388,399,0.063	Rask_block_9,404,426,3.3e-05	Rask_block_496,431,439,0.00022	Rask_block_6,440,464,8.2e-10	Rask_block_138,470,481,0.0028	Rask_block_50,488,516,8.1e-09	Rask_block_22,519,541,4.1e-12	Rask_block_159,542,555,3.8e-06	Rask_block_8,559,591,2.5e-17	Rask_block_1,596,619,4.9e-11	Rask_block_24,632,672,2e-17	Rask_block_10,681,699,0.00011
NS_L1_80_Contig35807_frame_-1	Rask_block_1,2,20,2.2e-06	Rask_block_70,21,49,9.2e-13	Rask_block_9,50,75,6.2e-10	Rask_block_118,77,91,1.1e-06	Rask_block_6,96,115,2.4e-12	Rask_block_181,120,137,1.1e-07	Rask_block_23,140,161,0.25	Rask_block_57,172,189,5.6e-07	Rask_block_116,194,205,0.006	Rask_block_8,209,230,1.8e-08
S_L8_68_Contig4461_frame_3	Rask_block_7,1,18,0.032	Rask_block_1,20,45,1.2e-08	Rask_block_9,71,96,2.1e-08	Rask_block_536,103,110,0.017	Rask_block_6,112,137,6.1e-14	Rask_block_150,141,157,8.7e-07	Rask_block_23,161,184,6.5e-09	Rask_block_57,195,216,3e-06	Rask_block_8,227,260,1.2e-14	Rask_block_1,269,294,2.3e-12	Rask_block_121,299,338,4.3e-24
NS_L7_17_23972_frm3_orf14	Rask_block_1,2,14,0.01	Rask_block_32,27,64,2.8e-09	Rask_block_10,85,110,6.6e-09	Rask_block_26,138,154,1.6e-05	Rask_block_15,176,197,3.9e-05	Rask_block_35,201,217,3.3e-06	Rask_block_4,230,247,6.4e-06	Rask_block_11,273,293,7.1e-09	Rask_block_237,294,306,0.0011	Rask_block_16,321,336,0.00049	Rask_block_3,337,354,6.8e-08	Rask_block_27,369,389,0.00082	Rask_block_561,394,401,0.067	Rask_block_5,404,423,1.2e-11	Rask_block_55,434,453,0.0095	Rask_block_29,467,489,1.8e-07	Rask_block_87,496,510,0.0015	Rask_block_2,511,528,3.4e-08	Rask_block_12,529,548,8e-05	Rask_block_7,551,577,2.4e-11	Rask_block_1,579,604,1.1e-10	Rask_block_370,607,622,1.7e-10	Rask_block_9,624,646,0.00026	Rask_block_178,648,666,2.7e-10	Rask_block_6,669,691,2e-12	Rask_block_103,701,718,2e-08	Rask_block_85,721,741,7.1e-12	Rask_block_22,753,774,1.2e-10	Rask_block_83,778,790,4.3e-06	Rask_block_8,793,812,5.3e-06
S_L7_42_Contig4316_frm1_orf12	Rask_block_20,23,44,6e-08	Rask_block_17,47,83,2.9e-09	Rask_block_19,91,122,1.9e-09	Rask_block_4,132,146,2.6e-09	Rask_block_13,157,177,1.6e-08	Rask_block_3,190,207,3.6e-08	Rask_block_219,208,218,1.1e-06
NS_L8_59_27398_frame_-2	Rask_block_1,2,20,1.9e-07	Rask_block_72,21,34,0.021	Rask_block_9,35,57,2.4e-06	Rask_block_244,59,69,0.0028	Rask_block_6,71,94,1.5e-11	Rask_block_50,115,142,1.7e-08	Rask_block_22,145,167,3e-15	Rask_block_159,168,181,4.7e-08	Rask_block_8,184,216,1e-18	Rask_block_1,231,251,3.8e-07	Rask_block_456,253,260,0.015	Rask_block_24,265,303,7.8e-14	Rask_block_10,313,339,5.4e-14	Rask_block_31,353,377,0.00052	Rask_block_56,378,396,5.9e-06
NS_L1_84_Contig9213_frame_2	Rask_block_10,30,59,1.2e-10	Rask_block_31,71,92,5.4e-06	Rask_block_127,95,120,1.6e-14	Rask_block_254,121,138,0.00011	Rask_block_21,158,171,0.0098
NS_L8_59_Contig6421_frame_3	Rask_block_3,1,14,0.00015	Rask_block_386,15,23,0.00025	Rask_block_14,28,46,0.00015	Rask_block_5,55,72,1.2e-09	Rask_block_36,78,107,1.7e-11	Rask_block_163,115,121,0.008	Rask_block_2,122,139,3.8e-12	Rask_block_130,140,153,1.1e-08	Rask_block_7,161,186,3.5e-09	Rask_block_1,188,213,7.1e-10	Rask_block_492,214,223,0.01	Rask_block_34,226,244,2.3e-05	Rask_block_9,248,273,2.9e-10	Rask_block_75,277,291,3.3e-06	Rask_block_6,336,358,1.6e-12	Rask_block_68,362,381,1.7e-07	Rask_block_23,385,406,1.8e-07	Rask_block_104,407,414,0.18	Rask_block_63,424,443,5.2e-12	Rask_block_339,450,460,0.00012	Rask_block_67,465,476,2.8e-05	Rask_block_316,483,491,0.00025	Rask_block_8,493,525,4.5e-17	Rask_block_1,534,559,4.7e-11	Rask_block_299,566,578,0.0023	Rask_block_32,583,626,3e-13	Rask_block_372,636,648,0.012	Rask_block_10,651,677,2.1e-07	Rask_block_26,709,722,2.6e-05	Rask_block_30,736,760,0.049	Rask_block_15,761,783,1.6e-06	Rask_block_35,789,804,1.1e-06	Rask_block_132,817,837,0.00018	Rask_block_4,845,861,1e-05	Rask_block_165,880,892,0.00067	Rask_block_11,893,913,4.8e-10	Rask_block_77,914,931,0.00014	Rask_block_16,936,952,3.7e-06	Rask_block_3,953,969,4.6e-08	Rask_block_358,975,993,2.4e-13	Rask_block_27,997,1014,0.0065	Rask_block_5,1022,1040,3.6e-11	Rask_block_55,1050,1068,0.00074
S_L7_20_Contig3327_frame_-3	Rask_block_2,6,23,5.2e-12	Rask_block_130,24,37,6.6e-10	Rask_block_7,44,69,1.5e-10	Rask_block_1,71,96,2.9e-10	Rask_block_239,99,107,0.014	Rask_block_34,110,128,1.8e-05	Rask_block_9,132,159,7.4e-10	Rask_block_75,163,179,5e-07	Rask_block_6,190,215,1.2e-13	Rask_block_68,220,238,2.1e-05	Rask_block_23,239,262,1.2e-10	Rask_block_104,263,275,0.0039	Rask_block_63,277,297,1.1e-09	Rask_block_114,299,314,0.22	Rask_block_67,315,327,2.7e-05	Rask_block_8,333,367,9.9e-18	Rask_block_1,378,403,1.2e-11	Rask_block_32,418,460,3.9e-14	Rask_block_10,481,508,1.1e-07	Rask_block_49,515,531,0.11	Rask_block_26,535,548,2.3e-05	Rask_block_30,566,592,3.3e-05	Rask_block_15,593,615,7.7e-07	Rask_block_35,619,635,2.3e-07	Rask_block_4,655,672,5.9e-06	Rask_block_11,702,722,9e-11	Rask_block_16,756,771,0.00028	Rask_block_3,772,788,1.4e-07	Rask_block_156,792,804,0.00034	Rask_block_27,808,828,2.3e-05	Rask_block_5,838,856,1.5e-10	Rask_block_29,883,902,0.0016	Rask_block_87,909,921,0.00071	Rask_block_2,923,939,2e-07	Rask_block_12,940,959,2.6e-07	Rask_block_7,971,996,3.2e-09	Rask_block_1,998,1023,4.7e-09	Rask_block_497,1028,1037,0.0019	Rask_block_9,1041,1061,0.04	Rask_block_298,1064,1073,0.004	Rask_block_6,1075,1098,1.1e-10	Rask_block_180,1101,1115,5.9e-05	Rask_block_50,1120,1144,2.3e-10	Rask_block_22,1149,1171,1.4e-12	Rask_block_8,1188,1221,1.2e-15	Rask_block_1,1230,1255,1.8e-08	Rask_block_24,1266,1307,5.5e-15	Rask_block_10,1316,1342,1.5e-08	Rask_block_31,1360,1378,2.8e-06
S_L8_68_Contig4465_frm1_orf0	Rask_block_5,2,15,8.2e-06	Rask_block_2,36,52,8.5e-12	Rask_block_48,54,73,0.017	Rask_block_1,83,108,1.8e-09	Rask_block_45,115,141,1.4e-09	Rask_block_78,145,165,1.6e-12	Rask_block_21,235,259,3.6e-12
NS_L8_54_Contig9618_frame_2	Rask_block_289,2,15,0.026	Rask_block_16,24,38,0.00016	Rask_block_3,39,56,6.2e-10	Rask_block_253,58,66,0.00011	Rask_block_27,74,93,1.2e-05	Rask_block_5,104,123,2.4e-11	Rask_block_301,125,145,3.3e-06	Rask_block_29,149,168,9.8e-08	Rask_block_2,189,206,1.2e-08	Rask_block_12,207,225,7.9e-05	Rask_block_7,237,262,7.3e-12	Rask_block_1,264,289,3.1e-09	Rask_block_9,302,327,4.6e-09
NS_L1_88_166787_frame_-3	Rask_block_3,18,34,2.5e-08	Rask_block_325,35,45,5.9e-08	Rask_block_14,46,74,7.7e-06	Rask_block_328,99,121,5.8e-08	Rask_block_2,123,139,8.4e-08	Rask_block_343,140,303,1.4e-91	Rask_block_18,305,323,3.3e-05	Rask_block_344,324,342,3.6e-14	Rask_block_342,359,447,2.7e-51	Rask_block_1,450,475,5.7e-12	Rask_block_329,482,616,1.9e-84	Rask_block_4,620,629,0.084
NS_L1_73_Contig25585_frame_3	Rask_block_3,1,15,6.2e-08	Rask_block_27,18,38,0.0067	Rask_block_5,47,64,1e-08	Rask_block_90,65,79,1.5e-05	Rask_block_29,87,103,0.00084	Rask_block_2,112,128,3e-09	Rask_block_166,130,147,0.001	Rask_block_7,150,174,1.4e-06	Rask_block_1,176,201,3.5e-10	Rask_block_9,220,245,1.5e-07	Rask_block_6,257,280,3.2e-07	Rask_block_50,301,327,9.8e-08	Rask_block_22,330,351,1.4e-11	Rask_block_8,368,401,5.4e-17	Rask_block_1,412,435,6e-08	Rask_block_508,436,446,0.0034	Rask_block_24,448,484,7.8e-11	Rask_block_10,496,522,1.4e-10	Rask_block_76,590,626,5.5e-13	Rask_block_4,633,647,0.00049	Rask_block_11,660,679,0.0026	Rask_block_3,686,703,1.8e-06	Rask_block_126,705,721,0.0005	Rask_block_5,736,753,7.2e-06	Rask_block_2,775,790,3.5e-08	Rask_block_200,793,846,0.00021	Rask_block_45,850,878,7.6e-10	Rask_block_78,882,902,1.1e-11	Rask_block_21,957,982,5.6e-11	Rask_block_41,984,1002,0.0012
NS_L1_95_Contig9037_frame_3	Rask_block_97,33,50,6.7e-09	Rask_block_206,51,90,2.3e-21	Rask_block_76,100,133,3.3e-12	Rask_block_4,134,146,0.0092	Rask_block_160,154,177,1.1e-14
S_L7_20_Contig3408_frame_1	Rask_block_55,13,32,1.9e-06	Rask_block_29,34,54,0.009	Rask_block_87,66,75,0.3	Rask_block_2,77,93,1.4e-07	Rask_block_12,94,111,0.0014	Rask_block_7,116,140,0.00025	Rask_block_1,143,168,1.1e-12	Rask_block_370,171,186,1.6e-09	Rask_block_9,189,211,0.00069	Rask_block_178,215,232,2e-07	Rask_block_6,233,258,4.2e-13	Rask_block_477,261,282,1.6e-05	Rask_block_85,287,299,0.022	Rask_block_22,319,330,0.0092	Rask_block_8,346,379,2.1e-15	Rask_block_1,390,415,1.1e-10	Rask_block_24,427,466,2.7e-14	Rask_block_10,479,505,3.9e-05	Rask_block_31,517,541,1e-05	Rask_block_52,543,560,0.099	Rask_block_235,581,601,6e-11	Rask_block_53,603,623,2e-09	Rask_block_4,633,649,1.7e-05	Rask_block_13,658,678,1.3e-07	Rask_block_385,680,689,6e-05	Rask_block_3,690,707,5.1e-09	Rask_block_429,708,719,0.019	Rask_block_14,720,743,0.00043	Rask_block_5,754,773,6.6e-11	Rask_block_291,774,788,1.6e-07	Rask_block_92,796,813,1.1e-07	Rask_block_2,814,831,1e-08	Rask_block_99,833,862,5.4e-11	Rask_block_1,864,889,0.0046	Rask_block_592,891,946,2.6e-24	Rask_block_93,952,967,1.4e-05	Rask_block_18,975,994,2e-08	Rask_block_124,996,1010,1.5e-05	Rask_block_76,1012,1048,3.4e-15	Rask_block_4,1049,1063,1.5e-05	Rask_block_11,1076,1096,0.00053	Rask_block_3,1103,1119,4e-08	Rask_block_108,1120,1139,1.2e-06	Rask_block_5,1151,1168,1.6e-10	Rask_block_142,1178,1188,0.14	Rask_block_2,1189,1205,1.7e-09	Rask_block_48,1207,1224,0.035	Rask_block_1,1236,1261,1.6e-05	Rask_block_45,1269,1293,2.5e-05
S_L7_16_Contig1605_frm-1_orf12	Rask_block_3,11,28,7.6e-10	Rask_block_544,30,39,8.8e-05
NS_L7_27_Contig2716_frame_3	Rask_block_23,1,20,1.2e-06	Rask_block_57,31,51,1.3e-06	Rask_block_8,61,94,8.5e-13	Rask_block_1,103,125,2.6e-09	Rask_block_121,134,172,2.5e-16	Rask_block_10,189,214,2.9e-06	Rask_block_267,247,272,2.4e-11	Rask_block_139,279,293,1.6e-06	Rask_block_4,295,309,1.5e-06	Rask_block_11,324,344,3e-06	Rask_block_16,352,365,0.0022	Rask_block_3,366,383,5.7e-08	Rask_block_86,384,404,0.0028	Rask_block_5,417,436,2.1e-10	Rask_block_133,437,462,1.9e-11	Rask_block_427,463,472,5.4e-05	Rask_block_2,474,490,3.3e-10	Rask_block_136,491,514,1.9e-11	Rask_block_1,519,544,2.9e-06	Rask_block_45,561,582,8.9e-07	Rask_block_78,587,608,1.2e-09	Rask_block_15,612,635,2.4e-05	Rask_block_585,641,658,0.029	Rask_block_4,659,676,1.8e-05	Rask_block_11,685,705,7.9e-10	Rask_block_77,706,718,0.0027	Rask_block_3,741,758,1e-06	Rask_block_27,761,780,0.0014	Rask_block_5,791,810,1.8e-09	Rask_block_90,811,825,7.4e-05	Rask_block_29,831,850,5.2e-05	Rask_block_2,865,881,9.5e-10	Rask_block_12,882,900,2.8e-06	Rask_block_7,902,926,2.7e-06	Rask_block_1,929,954,9.1e-09	Rask_block_151,955,972,0.0019	Rask_block_9,978,996,0.00026	Rask_block_6,1008,1033,6.3e-11	Rask_block_50,1052,1079,1e-05	Rask_block_22,1083,1105,6.7e-11	Rask_block_276,1106,1118,0.16	Rask_block_8,1121,1135,0.029
S_L3_13_Contig7195_frm3_orf0	Rask_block_61,14,39,7.9e-14	Rask_block_18,55,73,3e-08	Rask_block_26,113,129,0.0007	Rask_block_30,157,182,9.1e-05	Rask_block_15,183,208,2.3e-07	Rask_block_35,212,228,3.1e-07	Rask_block_4,237,254,1.6e-06	Rask_block_106,296,310,0.00019	Rask_block_11,313,333,4.2e-11	Rask_block_273,334,342,0.00074	Rask_block_16,368,383,0.11	Rask_block_3,384,401,3.6e-11	Rask_block_27,404,424,5.7e-08	Rask_block_5,437,454,7.8e-09
NS_L8_55_71548_frame_1	Rask_block_49,10,26,0.085	Rask_block_26,41,54,1.9e-06	Rask_block_30,61,87,0.0031	Rask_block_15,88,109,4.4e-09	Rask_block_35,115,127,0.00012	Rask_block_4,155,172,7.3e-07	Rask_block_11,187,199,0.0014
S_L6_19_Contig7160_frm3_orf22	Rask_block_81,82,96,0.15	Rask_block_463,131,172,0.05	Rask_block_11,212,225,0.031
NS_L1_80_Contig34733_frame_-1	Rask_block_19,6,38,4.5e-16	Rask_block_4,46,63,1.1e-06	Rask_block_13,72,92,1.4e-11	Rask_block_135,94,106,2.9e-07	Rask_block_3,108,124,8.7e-08	Rask_block_54,125,136,0.026	Rask_block_14,137,160,1.6e-06	Rask_block_5,170,183,3.5e-07
NS_L6_21_Contig12059_frame_-1	Rask_block_11,22,41,0.00013	Rask_block_3,47,64,2.2e-08	Rask_block_108,65,84,0.00011	Rask_block_5,94,113,1.7e-12	Rask_block_213,114,130,2e-07	Rask_block_2,132,149,3.1e-09	Rask_block_97,219,236,1.1e-07	Rask_block_206,237,277,3.4e-20	Rask_block_76,289,322,1.5e-07	Rask_block_4,323,335,0.00022
NS_L1_80_Contig35957_frame_-2	Rask_block_1,4,27,1.6e-08	Rask_block_24,40,79,3.3e-16	Rask_block_10,89,115,8.1e-09	Rask_block_31,127,143,2e-05	Rask_block_127,147,172,2.5e-05	Rask_block_30,182,203,0.0012	Rask_block_33,204,224,0.0035
S_L3_13_45835_frame_-1	Rask_block_1,1,19,1.7e-09	Rask_block_9,46,72,7.8e-09	Rask_block_6,85,110,2.8e-13	Rask_block_150,117,133,8e-05	Rask_block_23,135,158,1e-06	Rask_block_57,168,183,0.02	Rask_block_8,196,223,4.7e-10
NS_L1_95_37719_frame_-3	Rask_block_9,6,21,0.00067	Rask_block_75,25,41,7.3e-06	Rask_block_6,59,84,4.5e-15	Rask_block_68,88,106,1e-07	Rask_block_23,108,131,2.2e-09	Rask_block_391,132,140,0.0001	Rask_block_63,142,160,2.3e-07	Rask_block_110,164,178,6.8e-07	Rask_block_67,179,191,1.3e-05	Rask_block_8,200,233,2e-16	Rask_block_1,244,269,2.8e-14	Rask_block_32,279,318,2.4e-14	Rask_block_527,319,329,0.24	Rask_block_10,335,360,2.1e-07	Rask_block_26,393,408,1.8e-05	Rask_block_30,413,436,0.008	Rask_block_15,437,462,1.1e-06	Rask_block_35,465,482,1.3e-06	Rask_block_435,508,516,0.034	Rask_block_4,522,539,5.8e-06	Rask_block_11,556,576,2.1e-10	Rask_block_273,577,594,2.1e-09	Rask_block_16,603,619,0.00014	Rask_block_3,620,636,6e-07	Rask_block_437,646,665,6.3e-13	Rask_block_27,676,695,9.8e-06	Rask_block_5,705,724,2.6e-11	Rask_block_55,733,751,0.00027	Rask_block_29,758,779,0.00026	Rask_block_87,787,801,1.2e-05	Rask_block_2,802,818,1.8e-07	Rask_block_12,820,838,0.0093	Rask_block_7,850,875,2.7e-05	Rask_block_1,877,902,9.8e-09	Rask_block_72,903,919,0.0017	Rask_block_9,925,947,6e-05	Rask_block_6,961,983,1.8e-10	Rask_block_226,985,997,1.5e-05	Rask_block_50,1001,1028,9.1e-11	Rask_block_22,1031,1053,7.9e-11	Rask_block_8,1071,1089,3.3e-05
S_L7_20_Contig6453_frame_3	Rask_block_8,1,24,2.2e-09	Rask_block_1,30,53,2.4e-09	Rask_block_24,65,105,9.7e-16	Rask_block_10,112,135,9.1e-07	Rask_block_31,160,178,3e-06	Rask_block_56,180,199,0.0011	Rask_block_137,210,222,2.5e-05	Rask_block_28,223,234,0.084	Rask_block_21,249,261,0.011
NS_L8_65_Contig4969_frame_2	Rask_block_12,4,23,7.6e-09	Rask_block_7,24,49,7.3e-13	Rask_block_1,51,76,1.4e-09	Rask_block_70,77,101,1.1e-10	Rask_block_9,102,127,1.3e-09	Rask_block_6,143,168,1.3e-12	Rask_block_23,191,211,0.19	Rask_block_57,222,235,0.00014	Rask_block_8,259,291,3.3e-16	Rask_block_1,300,325,7.2e-12	Rask_block_32,337,372,7e-08	Rask_block_10,389,413,0.00024	Rask_block_26,441,457,3.1e-07	Rask_block_15,490,512,1.7e-06	Rask_block_35,514,527,9.7e-06	Rask_block_4,569,585,7.4e-06	Rask_block_73,592,606,0.22	Rask_block_11,611,631,9.9e-11	Rask_block_77,632,644,0.0012	Rask_block_16,659,672,0.0027	Rask_block_3,673,688,1.9e-07	Rask_block_358,691,715,0.03	Rask_block_27,721,738,0.00024	Rask_block_5,746,765,6.7e-11	Rask_block_55,779,797,0.011	Rask_block_29,800,820,0.0024	Rask_block_105,823,833,0.00023	Rask_block_2,834,849,3e-05
NS_L8_65_25194_frame_-1	Rask_block_20,30,51,4.8e-09	Rask_block_17,63,95,6.5e-06	Rask_block_19,99,138,3.4e-14	Rask_block_4,147,164,2.2e-06	Rask_block_13,174,195,8.9e-10	Rask_block_188,196,204,0.14	Rask_block_3,209,226,8.5e-07	Rask_block_79,227,240,1.4e-05	Rask_block_14,243,265,1.2e-07	Rask_block_64,271,283,0.0023	Rask_block_5,285,303,4.8e-09	Rask_block_36,307,335,9.2e-13	Rask_block_163,344,349,0.13	Rask_block_2,350,367,2.7e-12	Rask_block_12,368,387,3.4e-08	Rask_block_7,392,416,1e-08	Rask_block_1,419,444,7e-11	Rask_block_34,464,481,0.0049	Rask_block_9,485,511,7.8e-10	Rask_block_75,517,531,0.00037	Rask_block_6,548,571,9.3e-14	Rask_block_68,573,591,7.2e-09	Rask_block_23,595,617,8.8e-09	Rask_block_63,622,641,1.9e-09	Rask_block_67,661,670,0.00068	Rask_block_354,674,684,6e-06	Rask_block_8,686,719,6.7e-17	Rask_block_1,730,755,8.8e-12	Rask_block_32,765,805,9.4e-12	Rask_block_346,806,813,0.14
NS_L6_18_155418_frame_3	Rask_block_326,7,19,1.7e-11	Rask_block_2,22,36,1.8e-08	Rask_block_304,38,66,2.5e-23	Rask_block_1,67,92,1e-08	Rask_block_310,93,222,2e-85
NS_L1_88_Contig11633_frame_2	Rask_block_388,10,20,1.7e-05	Rask_block_16,37,51,3e-05	Rask_block_3,52,69,3e-10	Rask_block_126,85,97,0.034	Rask_block_5,110,129,1.8e-11	Rask_block_96,150,171,0.00021	Rask_block_2,179,195,4e-11	Rask_block_12,196,209,0.0017
NS_L6_18_Contig10917_frame_-3	Rask_block_2,6,23,4.9e-12	Rask_block_59,24,42,9.9e-09	Rask_block_1,58,83,1.8e-10	Rask_block_62,97,118,1.9e-08	Rask_block_209,121,140,6.5e-12	Rask_block_61,141,166,2.6e-16	Rask_block_18,179,198,9.6e-10	Rask_block_15,215,240,0.0037
NS_L8_51_Contig7772_frame_3	Rask_block_4,10,27,3.6e-09	Rask_block_13,36,57,7.6e-12	Rask_block_135,58,70,4.7e-07	Rask_block_3,74,90,1.5e-07	Rask_block_54,91,105,6.3e-06	Rask_block_14,108,126,3.2e-08	Rask_block_345,135,145,1.9e-06	Rask_block_5,146,163,4.8e-10	Rask_block_36,168,198,2.2e-12	Rask_block_163,199,205,0.0017	Rask_block_2,206,223,3e-13	Rask_block_12,224,243,4.6e-08	Rask_block_7,247,272,3.7e-11
S_L6_19_125563_frame_2	Rask_block_32,21,68,3e-13	Rask_block_372,81,93,0.0044	Rask_block_10,96,121,2.7e-06	Rask_block_49,124,138,0.15	Rask_block_26,140,153,3.4e-07	Rask_block_30,181,207,4.6e-05
NS_L6_21_43041_frame_3	Rask_block_1,1,13,0.085	Rask_block_72,14,30,4.5e-07	Rask_block_9,37,58,1.5e-05	Rask_block_504,64,73,0.0013	Rask_block_6,75,99,2.5e-10	Rask_block_173,104,116,0.0025	Rask_block_50,122,149,3e-10	Rask_block_22,151,173,1e-11	Rask_block_107,175,189,0.00011	Rask_block_8,193,226,3.3e-18	Rask_block_1,235,260,3.8e-14	Rask_block_24,271,312,2e-14	Rask_block_10,321,348,1.7e-07	Rask_block_207,351,357,0.02	Rask_block_31,360,378,9.3e-08	Rask_block_205,401,409,0.0043
NS_L7_19_Contig8777_frame_-1	Rask_block_13,15,35,2e-05	Rask_block_3,47,64,1.4e-09	Rask_block_5,111,129,7.1e-11	Rask_block_92,152,166,1.7e-07	Rask_block_2,167,184,2.3e-09	Rask_block_403,185,214,4.3e-21	Rask_block_1,217,242,3.6e-09	Rask_block_115,259,275,7.2e-08	Rask_block_93,281,298,1.7e-06	Rask_block_18,303,322,8.2e-08	Rask_block_407,323,335,1.1e-05	Rask_block_76,338,373,1.4e-11	Rask_block_4,376,387,0.0048	Rask_block_11,401,421,5.7e-05	Rask_block_3,427,436,0.085
NS_L8_59_Contig2299_frm-2_orf0	Rask_block_20,6,27,2.3e-08	Rask_block_17,32,62,1.2e-09	Rask_block_19,66,97,4.4e-10	Rask_block_4,103,118,0.0018	Rask_block_13,128,148,2.9e-09	Rask_block_188,149,157,0.071	Rask_block_3,170,179,0.0034	Rask_block_79,180,195,3.3e-09	Rask_block_14,196,214,0.00029	Rask_block_64,221,232,0.0087	Rask_block_5,236,252,3.6e-08	Rask_block_36,260,290,2.6e-07	Rask_block_2,305,315,0.0017
NS_L1_80_Contig14433_frame_1	Rask_block_45,26,58,4.1e-10	Rask_block_18,70,89,2.6e-07	Rask_block_52,97,114,0.0039	Rask_block_123,115,135,4e-09	Rask_block_338,137,157,1.4e-13	Rask_block_53,159,179,7.5e-06	Rask_block_4,190,206,5.6e-10	Rask_block_13,217,235,0.0083	Rask_block_393,237,245,0.00017	Rask_block_3,247,264,9.4e-10	Rask_block_14,276,292,0.031	Rask_block_5,303,318,4.3e-09
NS_L6_21_Contig12484_frame_2	Rask_block_8,1,34,5.3e-16	Rask_block_1,43,68,1.8e-11	Rask_block_512,70,85,0.077	Rask_block_32,91,130,1.2e-09	Rask_block_10,147,173,5e-06	Rask_block_246,174,187,0.017	Rask_block_30,236,260,0.028	Rask_block_15,261,283,2.2e-09	Rask_block_35,286,301,2.4e-05	Rask_block_4,306,323,2.4e-06	Rask_block_453,339,348,0.11	Rask_block_11,380,400,3.5e-11	Rask_block_77,401,416,0.00041	Rask_block_16,423,438,0.001	Rask_block_3,439,455,4.8e-08	Rask_block_156,459,471,0.00013	Rask_block_27,475,494,4.9e-05	Rask_block_5,504,523,4.5e-11	Rask_block_96,544,565,3.5e-07	Rask_block_2,574,590,1.9e-10	Rask_block_12,591,609,0.00016	Rask_block_1,643,668,1.7e-09	Rask_block_9,685,708,2e-07	Rask_block_6,722,745,8.4e-13	Rask_block_243,751,762,0.00043	Rask_block_50,764,790,1.3e-09	Rask_block_22,793,815,3.1e-12	Rask_block_8,831,864,4.2e-15	Rask_block_1,873,898,5.5e-10	Rask_block_24,910,951,3.8e-14	Rask_block_10,963,992,2e-07	Rask_block_31,1004,1023,0.00027	Rask_block_56,1024,1042,0.00037	Rask_block_33,1049,1059,0.061	Rask_block_21,1095,1120,5.1e-13
S_L7_20_Contig6595_frame_-3	Rask_block_1,8,33,4.1e-10	Rask_block_34,46,62,0.067	Rask_block_9,66,92,6.3e-10	Rask_block_75,95,111,2.8e-07	Rask_block_245,123,132,0.00043	Rask_block_6,136,160,4.1e-15	Rask_block_68,166,184,1.1e-09	Rask_block_23,187,210,4.7e-09	Rask_block_63,226,245,6.5e-10	Rask_block_114,247,259,0.0034	Rask_block_67,261,271,7.3e-05	Rask_block_8,285,317,3.9e-17	Rask_block_1,326,351,8.8e-11	Rask_block_32,372,410,6.1e-14	Rask_block_240,421,430,0.14	Rask_block_10,431,457,4.4e-07	Rask_block_52,483,500,0.098	Rask_block_65,506,542,1.4e-15	Rask_block_53,551,570,1e-07	Rask_block_4,582,598,8.6e-07	Rask_block_13,616,635,1.5e-06	Rask_block_3,655,672,2.4e-08	Rask_block_146,673,684,1.9e-05	Rask_block_14,685,708,1.9e-07	Rask_block_5,718,737,1.5e-10	Rask_block_2,751,768,4.8e-11	Rask_block_59,769,789,6.9e-08	Rask_block_382,791,800,0.00055	Rask_block_1,801,826,2.8e-05	Rask_block_62,844,867,2.5e-08	Rask_block_209,868,887,1.8e-10	Rask_block_61,890,915,3e-13	Rask_block_18,919,936,5e-07	Rask_block_15,954,978,6.7e-05	Rask_block_139,983,996,0.002	Rask_block_4,998,1015,6.4e-08	Rask_block_11,1023,1042,8.7e-09	Rask_block_3,1062,1079,1.3e-06	Rask_block_82,1082,1104,7.8e-08	Rask_block_5,1114,1132,2.6e-10	Rask_block_519,1134,1152,7.1e-10	Rask_block_2,1154,1169,4.5e-10	Rask_block_136,1171,1192,5e-07	Rask_block_1,1199,1224,9.8e-11	Rask_block_45,1243,1270,3.4e-09	Rask_block_257,1274,1297,6.1e-14	Rask_block_28,1304,1314,0.028	Rask_block_15,1332,1353,2.4e-06	Rask_block_35,1358,1371,9.7e-05
NS_L8_55_Contig2211_frame_1	Rask_block_328,1,19,9.2e-13	Rask_block_2,21,36,1e-07	Rask_block_343,38,214,2.2e-97	Rask_block_18,216,232,0.00056
NS_L8_51_Contig7805_frame_-3	Rask_block_20,43,62,4.7e-08	Rask_block_17,69,101,1e-05	Rask_block_19,109,143,1.6e-15	Rask_block_4,149,166,6.5e-07	Rask_block_13,176,197,2e-09	Rask_block_3,214,230,8.3e-06	Rask_block_79,231,246,1.8e-07	Rask_block_14,247,268,2.2e-06	Rask_block_5,292,310,6.5e-10	Rask_block_36,314,339,2.5e-11	Rask_block_88,349,355,0.012	Rask_block_2,356,373,6.3e-12	Rask_block_12,375,393,1e-06	Rask_block_7,397,421,0.046	Rask_block_1,424,449,1.3e-07	Rask_block_34,458,476,0.021	Rask_block_9,482,507,8.4e-11	Rask_block_118,509,523,2e-06	Rask_block_6,526,549,8.7e-13	Rask_block_143,552,569,6.1e-09	Rask_block_23,571,592,0.0007	Rask_block_57,652,670,3.3e-05	Rask_block_116,675,687,0.00064	Rask_block_8,690,721,3e-14	Rask_block_472,723,730,0.00041	Rask_block_1,732,758,3.4e-11	Rask_block_32,768,805,1.9e-11	Rask_block_372,820,832,7.7e-05	Rask_block_10,835,860,5.2e-07	Rask_block_26,888,900,0.0017	Rask_block_30,917,942,0.023	Rask_block_15,944,966,1.8e-05	Rask_block_35,969,983,2.2e-06	Rask_block_4,1014,1031,4.2e-06	Rask_block_81,1046,1064,0.00039	Rask_block_11,1067,1087,3.3e-10	Rask_block_16,1112,1128,1.8e-05	Rask_block_3,1129,1146,4.3e-09	Rask_block_27,1157,1175,2.9e-06	Rask_block_5,1194,1212,5.8e-10	Rask_block_55,1213,1232,0.0027	Rask_block_29,1238,1257,3e-05	Rask_block_87,1266,1279,0.00029	Rask_block_2,1282,1296,0.00034	Rask_block_7,1319,1344,3.6e-11	Rask_block_1,1346,1367,1.7e-05	Rask_block_72,1380,1396,5.2e-05	Rask_block_9,1407,1424,0.004	Rask_block_6,1435,1460,6.9e-11
S_L8_56_Contig1830_frame_2	Rask_block_5,4,23,7.2e-08	Rask_block_301,25,46,2.4e-06	Rask_block_29,60,78,8.8e-07	Rask_block_105,92,102,1.3e-06	Rask_block_2,103,119,1.8e-08	Rask_block_12,121,139,0.00014	Rask_block_7,144,169,2e-12	Rask_block_1,171,182,0.027
NS_L7_29_Contig7951_frame_2	Rask_block_1,1,19,8.8e-06	Rask_block_72,20,29,0.058	Rask_block_184,39,52,0.0012	Rask_block_9,56,84,8.3e-12	Rask_block_75,87,98,0.0027	Rask_block_6,113,137,9.1e-16	Rask_block_68,142,161,1.2e-08	Rask_block_23,163,185,6.8e-11	Rask_block_63,200,220,3.6e-10	Rask_block_110,231,242,0.00098	Rask_block_67,243,254,2.9e-05	Rask_block_8,261,281,5.8e-09
NS_L1_95_Contig1832_frame_2	Rask_block_20,10,31,0.016	Rask_block_17,35,70,4.6e-13	Rask_block_19,74,107,1.5e-16	Rask_block_4,114,131,2.1e-05	Rask_block_13,140,161,2.8e-07	Rask_block_215,163,174,0.003	Rask_block_3,176,192,1.2e-06	Rask_block_79,193,207,3.8e-05	Rask_block_14,209,231,2.8e-08	Rask_block_5,249,267,3.6e-11	Rask_block_36,271,297,2.4e-08	Rask_block_2,302,319,9.5e-13	Rask_block_346,320,327,0.052
NS_L8_54_37036_frame_-1	Rask_block_20,48,70,2.5e-07	Rask_block_17,73,105,1.4e-09	Rask_block_19,110,146,1.2e-13	Rask_block_4,156,173,6.5e-07	Rask_block_13,185,206,8.7e-09	Rask_block_215,209,219,0.0065	Rask_block_3,221,237,5.6e-06	Rask_block_79,238,252,6.1e-07	Rask_block_14,254,273,7.2e-07	Rask_block_64,276,290,0.0013	Rask_block_5,292,310,6.8e-10	Rask_block_36,314,340,3.6e-10	Rask_block_153,350,356,0.0096	Rask_block_2,357,374,4.5e-12	Rask_block_12,375,394,2.5e-05	Rask_block_7,396,421,2.2e-11	Rask_block_1,423,448,2.3e-09	Rask_block_70,449,478,4.4e-05	Rask_block_9,479,504,7.8e-07	Rask_block_6,526,548,4.5e-10	Rask_block_251,551,568,2.8e-05	Rask_block_23,570,593,4.5e-05	Rask_block_154,596,605,0.054	Rask_block_57,607,626,9.2e-08	Rask_block_8,637,668,1.3e-12	Rask_block_1,678,703,3.7e-11	Rask_block_32,715,750,0.019	Rask_block_10,764,790,1.7e-05	Rask_block_49,796,814,0.054	Rask_block_26,818,829,0.00063	Rask_block_157,831,839,0.035	Rask_block_15,866,887,1.8e-07	Rask_block_35,892,907,2.5e-06	Rask_block_4,958,975,1.3e-06	Rask_block_81,999,1020,0.019	Rask_block_165,1022,1036,0.01	Rask_block_11,1041,1061,1.9e-09	Rask_block_77,1062,1079,0.0051	Rask_block_16,1085,1100,0.0097	Rask_block_3,1101,1117,1.2e-07	Rask_block_156,1121,1133,0.00011	Rask_block_27,1137,1157,0.0038	Rask_block_5,1172,1191,2.5e-10	Rask_block_55,1195,1213,4.6e-06	Rask_block_29,1225,1248,3.1e-07	Rask_block_105,1250,1259,0.014	Rask_block_2,1261,1277,1.7e-07
S_L8_68_Contig3144_frame_3	Rask_block_315,4,58,7.3e-16	Rask_block_4,64,81,3e-07	Rask_block_13,90,111,5.3e-07	Rask_block_3,122,139,1e-10	Rask_block_544,140,146,0.13	Rask_block_14,152,175,1.2e-07
S_L7_42_Contig2285_frm-3_orf6	Rask_block_73,3,14,0.00092	Rask_block_246,53,63,0.058
S_L3_13_Contig7128_frame_2	Rask_block_7,32,57,4.4e-12	Rask_block_1,59,84,3.9e-09	Rask_block_72,86,100,6.4e-05	Rask_block_9,102,122,0.0017	Rask_block_6,139,164,2e-13	Rask_block_50,186,213,1.6e-10	Rask_block_22,216,238,9.1e-13	Rask_block_159,239,252,3.7e-08	Rask_block_8,254,274,3.2e-09
NS_L7_44_Contig8030_frame_3	Rask_block_2,4,21,2.5e-12	Rask_block_12,22,38,1.7e-06	Rask_block_7,44,69,1.1e-11	Rask_block_1,71,96,4.9e-11	Rask_block_70,98,125,8e-12	Rask_block_9,126,152,5.1e-11	Rask_block_268,153,162,0.069	Rask_block_6,167,186,2.8e-11	Rask_block_23,215,236,0.0058	Rask_block_57,249,257,0.084	Rask_block_8,288,320,3.9e-16	Rask_block_1,329,354,1.3e-10	Rask_block_32,361,397,1.2e-06	Rask_block_10,411,437,4.3e-06	Rask_block_30,489,512,0.0032	Rask_block_15,517,538,0.00034	Rask_block_35,543,558,8.6e-05	Rask_block_34,560,573,0.2	Rask_block_4,585,601,1.2e-05	Rask_block_11,651,671,1.5e-10	Rask_block_16,693,707,0.00099	Rask_block_3,709,724,1.3e-07	Rask_block_437,734,744,0.0031
S_L8_68_Contig2025_frame_1	Rask_block_292,7,17,0.012	Rask_block_32,19,59,9e-12	Rask_block_10,82,108,6.8e-06	Rask_block_26,144,155,0.014	Rask_block_30,172,197,8e-07	Rask_block_15,199,221,1.6e-07	Rask_block_35,223,236,0.00076	Rask_block_4,251,268,3.9e-05	Rask_block_11,301,321,2.7e-09	Rask_block_77,322,339,0.032	Rask_block_16,376,392,3.6e-06	Rask_block_3,393,409,6.1e-07	Rask_block_156,416,427,0.0076	Rask_block_27,432,452,0.0066	Rask_block_5,466,485,4.3e-11	Rask_block_55,486,505,0.0003	Rask_block_29,516,532,0.00065	Rask_block_2,560,576,1.2e-06	Rask_block_12,577,596,0.00067	Rask_block_7,602,627,1.1e-07	Rask_block_1,629,654,2.4e-11	Rask_block_72,656,671,0.0016	Rask_block_9,677,701,8.4e-06	Rask_block_443,704,712,0.33	Rask_block_6,713,738,3.1e-13	Rask_block_138,739,752,0.0037	Rask_block_50,759,782,0.00011	Rask_block_22,785,807,2.7e-08	Rask_block_555,808,816,3.3e-05	Rask_block_8,823,856,4.9e-16	Rask_block_1,865,890,6.1e-10	Rask_block_24,903,942,3.9e-17	Rask_block_10,950,975,3.9e-08	Rask_block_31,991,1010,0.00053	Rask_block_127,1012,1040,0.00014	Rask_block_366,1077,1085,0.14	Rask_block_21,1088,1112,3.7e-13
NS_L1_84_Contig10104_frm3_orf6	Rask_block_73,72,86,0.00042	Rask_block_28,152,160,0.043
S_L7_16_Contig5108_frm2_orf30	Rask_block_1,24,37,0.00056	Rask_block_32,57,94,2.9e-13	Rask_block_10,110,137,3.9e-10	Rask_block_26,165,179,4.3e-08	Rask_block_30,202,224,0.00075	Rask_block_15,225,246,0.0001	Rask_block_35,252,268,1.3e-07	Rask_block_236,280,288,0.26	Rask_block_4,292,309,1.5e-05	Rask_block_11,351,370,2.2e-09	Rask_block_77,372,387,0.0003	Rask_block_16,392,407,2.3e-05	Rask_block_3,408,425,5.1e-09	Rask_block_359,431,440,0.19	Rask_block_27,443,463,0.0087	Rask_block_5,476,495,1e-12	Rask_block_55,503,521,0.00011	Rask_block_29,525,547,0.00096	Rask_block_2,554,571,1.5e-10	Rask_block_12,572,586,0.00028	Rask_block_7,590,614,4.3e-08	Rask_block_1,616,641,3.3e-11	Rask_block_9,655,675,0.0044	Rask_block_6,687,711,7.6e-08	Rask_block_138,717,729,8.7e-05	Rask_block_50,733,759,8.2e-08	Rask_block_22,762,784,9e-12	Rask_block_172,786,798,6.8e-05	Rask_block_8,801,827,6.4e-10
S_L7_16_Contig5105_frame_-2	Rask_block_13,18,39,5.2e-10	Rask_block_102,40,51,0.00022	Rask_block_3,58,74,2e-06	Rask_block_524,78,87,0.00034	Rask_block_14,89,111,1.6e-05	Rask_block_5,121,138,1.3e-09	Rask_block_36,146,172,4.4e-10	Rask_block_153,174,180,0.01	Rask_block_2,181,198,4.7e-12	Rask_block_130,199,212,4.4e-10	Rask_block_7,219,244,1.4e-10	Rask_block_1,246,271,7.2e-08	Rask_block_34,279,295,0.0025	Rask_block_9,299,325,7.4e-11	Rask_block_75,328,344,5e-08	Rask_block_245,348,357,0.0028	Rask_block_6,360,385,2.5e-13	Rask_block_68,393,408,9.9e-07	Rask_block_23,411,433,4.9e-10	Rask_block_208,434,445,4.3e-07	Rask_block_63,452,471,2.9e-10	Rask_block_110,477,491,0.00028	Rask_block_67,492,504,1.2e-06	Rask_block_333,506,518,0.11	Rask_block_8,520,553,3.4e-15	Rask_block_1,564,590,3e-11	Rask_block_32,605,649,6.4e-13	Rask_block_10,663,685,2e-05	Rask_block_26,741,756,0.21	Rask_block_332,783,792,0.0034	Rask_block_15,793,814,0.25	Rask_block_35,819,833,1.5e-06	Rask_block_4,867,884,7.1e-06	Rask_block_73,931,944,0.053	Rask_block_11,948,968,3.4e-10	Rask_block_77,969,984,0.00032	Rask_block_16,992,1008,0.0098	Rask_block_3,1009,1026,2.3e-08	Rask_block_27,1038,1057,0.0012	Rask_block_5,1069,1088,4.6e-09	Rask_block_55,1099,1115,4.4e-05	Rask_block_29,1126,1143,0.00033	Rask_block_2,1170,1185,9.2e-07	Rask_block_12,1187,1206,1.8e-05	Rask_block_7,1208,1232,2.6e-08	Rask_block_1,1234,1259,1.4e-09	Rask_block_72,1260,1276,0.00077	Rask_block_9,1277,1299,2e-05	Rask_block_6,1318,1343,5.9e-12
NS_L1_95_37099_frame_2	Rask_block_1,1,22,4.5e-08	Rask_block_184,38,51,0.0024	Rask_block_9,55,81,3.4e-14	Rask_block_75,84,100,4.4e-07	Rask_block_6,105,129,1.3e-13	Rask_block_143,132,149,5.7e-10	Rask_block_23,151,173,1.5e-06	Rask_block_154,176,192,4.4e-06	Rask_block_57,211,227,0.0001	Rask_block_263,231,244,9.6e-08	Rask_block_8,248,279,4.6e-15	Rask_block_1,289,314,1.3e-11	Rask_block_532,315,322,0.3	Rask_block_32,326,363,2.8e-13	Rask_block_10,378,399,1.5e-07
NS_L7_44_Contig9614_frame_-2	Rask_block_52,12,28,6.2e-05	Rask_block_65,48,82,4.2e-13	Rask_block_53,92,110,2.8e-05	Rask_block_4,120,137,1.3e-07	Rask_block_13,155,176,1.5e-08	Rask_block_3,185,202,2.1e-08	Rask_block_14,214,233,3.6e-05	Rask_block_5,252,269,2.4e-10	Rask_block_2,286,303,5.7e-11	Rask_block_59,304,323,2.8e-05	Rask_block_1,338,360,1.1e-06	Rask_block_62,380,400,1e-05	Rask_block_61,410,435,1.4e-11	Rask_block_18,438,457,3.1e-06	Rask_block_49,467,482,0.13	Rask_block_26,491,506,0.00041	Rask_block_30,521,544,0.00028	Rask_block_15,545,565,4.6e-05	Rask_block_35,571,586,2.9e-07	Rask_block_34,589,602,0.099	Rask_block_4,615,631,7.2e-06	Rask_block_165,642,656,0.0032	Rask_block_11,658,678,3.5e-09	Rask_block_109,680,701,0.0017	Rask_block_16,706,722,4.7e-06	Rask_block_3,723,740,2.6e-09	Rask_block_253,742,750,0.00072	Rask_block_27,761,777,0.28	Rask_block_5,795,813,1.6e-10	Rask_block_55,827,845,0.0002	Rask_block_29,855,874,6.6e-06	Rask_block_498,876,885,3.7e-05	Rask_block_2,888,902,1.1e-06	Rask_block_12,904,923,0.00018	Rask_block_7,926,950,2.2e-09	Rask_block_1,952,977,2e-09	Rask_block_72,978,994,0.0006	Rask_block_9,1006,1022,0.13	Rask_block_6,1035,1058,8e-10	Rask_block_243,1064,1078,5e-05	Rask_block_50,1080,1107,3.5e-12	Rask_block_22,1111,1133,9.5e-13	Rask_block_159,1134,1142,0.021	Rask_block_8,1150,1182,1.2e-15	Rask_block_1,1187,1210,4.4e-07	Rask_block_24,1222,1261,5.5e-17	Rask_block_10,1271,1296,2.1e-09	Rask_block_224,1298,1308,0.00032	Rask_block_31,1310,1325,0.014
NS_L8_60_Contig8492_frame_-2	Rask_block_246,27,44,0.024	Rask_block_340,74,93,1.7e-10	Rask_block_15,136,157,2.4e-05	Rask_block_35,160,174,6e-06	Rask_block_4,209,226,1.6e-05	Rask_block_453,246,258,4.1e-05	Rask_block_11,264,284,1.7e-10	Rask_block_77,285,302,1.2e-05	Rask_block_16,312,328,0.0043	Rask_block_3,329,345,1.2e-08	Rask_block_156,349,361,1.3e-05	Rask_block_27,365,385,3.4e-05
S_L8_56_Contig2721_frm-3_orf5	Rask_block_20,29,50,0.00048	Rask_block_17,55,89,4.5e-12	Rask_block_19,95,127,6.1e-12	Rask_block_4,136,153,3.4e-08	Rask_block_13,162,181,4.2e-05	Rask_block_3,191,208,1.7e-06	Rask_block_54,209,220,0.033	Rask_block_14,226,245,0.0018	Rask_block_5,253,272,1.7e-08	Rask_block_60,282,307,7.4e-09	Rask_block_2,308,324,2.3e-09	Rask_block_12,327,344,1.1e-05	Rask_block_7,346,370,1.6e-09	Rask_block_1,373,398,1.6e-08	Rask_block_70,401,423,0.016	Rask_block_9,424,450,1e-09	Rask_block_6,466,489,1.7e-14	Rask_block_150,493,509,0.00012	Rask_block_23,513,536,3.2e-10	Rask_block_57,547,566,6.3e-10	Rask_block_8,578,610,2.4e-12	Rask_block_1,619,642,2.1e-10	Rask_block_121,650,688,1.6e-20	Rask_block_10,706,730,4.8e-07	Rask_block_141,732,749,0.0074	Rask_block_52,754,770,0.00028	Rask_block_65,776,810,4e-17	Rask_block_53,818,833,0.0019	Rask_block_4,847,864,1e-05	Rask_block_13,878,899,2e-09	Rask_block_3,914,931,9.5e-11	Rask_block_457,932,943,2.3e-08	Rask_block_14,944,967,7.5e-07	Rask_block_5,978,995,4.9e-10
S_L8_56_Contig6306_frame_2	Rask_block_1,5,30,4.5e-11	Rask_block_24,42,84,7.9e-16	Rask_block_10,91,118,4.5e-12	Rask_block_31,131,149,0.00069	Rask_block_127,154,180,0.018	Rask_block_30,210,230,0.054
S_L6_19_Contig11203_frame_-3	Rask_block_20,30,51,1.3e-09	Rask_block_17,54,86,2e-08	Rask_block_19,94,127,9.4e-13	Rask_block_4,134,151,2.2e-06	Rask_block_13,162,183,1.2e-10	Rask_block_3,196,212,4.8e-07	Rask_block_79,213,226,3.1e-07	Rask_block_14,229,251,0.00015	Rask_block_210,256,268,1.7e-06	Rask_block_5,269,286,4.3e-09	Rask_block_36,292,317,8.5e-11	Rask_block_163,325,331,0.0026	Rask_block_2,332,349,1.2e-12	Rask_block_12,350,368,2.8e-07	Rask_block_7,371,395,2.8e-10
NS_L7_35_Contig6329_frame_1	Rask_block_27,7,20,0.022	Rask_block_5,47,63,9.2e-08	Rask_block_249,64,80,0.0013	Rask_block_29,86,108,4.7e-07	Rask_block_170,112,124,1.3e-05	Rask_block_2,126,142,2.5e-08	Rask_block_12,143,162,2.2e-05	Rask_block_7,168,193,2.5e-08	Rask_block_1,195,220,1.9e-10	Rask_block_72,221,237,0.00016	Rask_block_9,242,267,1.6e-06	Rask_block_6,285,310,5.8e-12	Rask_block_138,314,326,0.049
NS_L7_29_Contig5997_frame_2	Rask_block_20,34,55,3.2e-09	Rask_block_17,58,88,8e-09	Rask_block_19,92,126,4.8e-12	Rask_block_4,132,149,1.6e-07	Rask_block_13,157,178,1.6e-09	Rask_block_3,195,211,5.6e-06	Rask_block_79,212,227,3.5e-09	Rask_block_14,228,245,9.4e-05	Rask_block_64,257,269,0.0023	Rask_block_5,271,288,1.2e-08	Rask_block_36,294,323,2.2e-11	Rask_block_2,328,345,3.5e-11	Rask_block_12,346,365,6e-08	Rask_block_7,368,392,4.3e-09	Rask_block_1,395,420,1.5e-11	Rask_block_9,449,475,1.1e-09	Rask_block_186,478,495,2e-09	Rask_block_6,498,519,1.6e-13	Rask_block_68,526,545,3.3e-08	Rask_block_23,548,570,1.1e-08	Rask_block_104,571,581,0.0042	Rask_block_63,592,611,1.8e-09	Rask_block_288,621,633,0.00023	Rask_block_67,634,646,4.5e-05	Rask_block_8,651,685,6.8e-18	Rask_block_1,694,719,7.6e-14	Rask_block_32,734,777,2.5e-13	Rask_block_125,785,795,0.2	Rask_block_10,796,823,1.4e-06	Rask_block_26,839,852,7.4e-05	Rask_block_15,900,921,0.0058	Rask_block_35,924,939,1.6e-06	Rask_block_4,964,981,2.8e-06	Rask_block_73,1032,1046,0.028	Rask_block_11,1050,1070,1.1e-11	Rask_block_109,1071,1089,1.6e-05	Rask_block_16,1095,1110,1.5e-05	Rask_block_3,1111,1127,9.9e-08	Rask_block_156,1131,1143,9.2e-06	Rask_block_27,1147,1163,0.0084	Rask_block_5,1184,1202,0.0012	Rask_block_301,1204,1221,0.26	Rask_block_29,1225,1244,0.00015	Rask_block_2,1264,1281,7.3e-08
NS_L7_29_Contig7039_frm-1_orf5	Rask_block_20,16,37,7.9e-07	Rask_block_17,40,71,5e-10	Rask_block_19,73,106,5.8e-08	Rask_block_4,113,125,0.00045
NS_L1_95_Contig7773_frame_2	Rask_block_2,1,18,9.3e-13	Rask_block_130,19,32,3.5e-10	Rask_block_7,40,64,3.5e-09	Rask_block_1,67,92,3.5e-10	Rask_block_34,98,114,0.0008	Rask_block_9,118,146,1.9e-12	Rask_block_75,150,166,0.0004	Rask_block_6,171,195,3.1e-13	Rask_block_23,220,241,8.1e-11	Rask_block_57,254,272,2e-07	Rask_block_8,282,314,6.5e-12
NS_L8_59_Contig5587_frame_-1	Rask_block_14,5,27,7.2e-07	Rask_block_161,29,38,0.00044	Rask_block_5,39,58,1.5e-10	Rask_block_60,69,92,6.6e-10	Rask_block_2,93,110,1.4e-12	Rask_block_12,111,128,3.8e-07	Rask_block_7,134,158,7.4e-10	Rask_block_1,161,186,5e-11	Rask_block_70,187,216,1.4e-08	Rask_block_9,217,242,7.5e-09	Rask_block_75,248,262,1.6e-06	Rask_block_6,276,301,1.3e-15	Rask_block_68,308,328,2.9e-11	Rask_block_23,329,352,1.6e-09	Rask_block_104,353,364,0.0005	Rask_block_63,372,391,1.7e-10	Rask_block_110,398,412,1.7e-05	Rask_block_67,413,425,4.8e-06	Rask_block_482,427,439,1.5e-06	Rask_block_8,441,456,9e-06
NS_L7_19_Contig10843_frame_3	Rask_block_1,20,45,2.2e-13	Rask_block_32,59,96,1.9e-14	Rask_block_578,101,113,2.8e-05	Rask_block_10,114,141,4.5e-08	Rask_block_26,171,182,0.00071	Rask_block_254,212,227,0.11	Rask_block_15,231,253,3.8e-05	Rask_block_35,255,271,5.7e-09	Rask_block_4,300,317,7.9e-06	Rask_block_11,349,369,1.9e-10	Rask_block_77,370,384,6.8e-05	Rask_block_16,420,436,4e-07	Rask_block_3,437,454,2.6e-08	Rask_block_253,456,464,0.00034	Rask_block_27,482,498,0.0022	Rask_block_5,518,536,1.2e-10	Rask_block_324,537,544,0.0026	Rask_block_29,561,583,5.4e-08	Rask_block_87,587,601,0.0007	Rask_block_2,603,619,5.6e-08	Rask_block_12,620,638,0.0037	Rask_block_7,647,672,8.7e-07	Rask_block_1,674,699,3.2e-09	Rask_block_72,707,723,0.0003	Rask_block_9,724,746,5.3e-05	Rask_block_6,760,785,2.7e-10	Rask_block_50,802,827,1.4e-07	Rask_block_22,830,852,7.6e-14	Rask_block_159,853,859,0.17	Rask_block_8,868,895,1e-11
NS_L1_80_Contig35671_frame_1	Rask_block_35,1,12,0.00011	Rask_block_132,21,36,0.24	Rask_block_4,42,59,5.9e-07	Rask_block_81,97,106,0.21	Rask_block_11,116,136,3.4e-11	Rask_block_77,137,154,1.5e-06
S_L3_13_94278_frame_-2	Rask_block_609,6,11,0.22	Rask_block_29,17,37,4.4e-06	Rask_block_460,38,43,0.16	Rask_block_2,46,62,1.7e-11	Rask_block_48,63,81,3.2e-06	Rask_block_1,90,115,1.1e-09	Rask_block_45,128,160,7.1e-12
NS_L7_17_Contig4928_frame_2	Rask_block_29,1,14,0.039	Rask_block_509,18,29,2.6e-08	Rask_block_2,32,46,5.7e-08	Rask_block_12,49,65,0.00044	Rask_block_7,73,97,0.00033	Rask_block_1,99,124,2e-12	Rask_block_72,125,141,0.00023	Rask_block_9,148,170,4.7e-06	Rask_block_6,181,205,5.7e-14	Rask_block_50,226,252,2e-09	Rask_block_22,256,278,9.8e-13	Rask_block_159,279,291,6.4e-08	Rask_block_8,295,327,1.5e-19	Rask_block_1,332,345,0.036
S_L8_68_Contig6304_frame_-3	Rask_block_5,3,12,0.0048	Rask_block_96,55,73,5e-06	Rask_block_2,84,100,5.8e-08	Rask_block_12,101,116,0.0034	Rask_block_7,120,143,1.5e-05	Rask_block_1,146,171,4.7e-09	Rask_block_72,172,188,7.2e-06	Rask_block_9,189,213,1.9e-08	Rask_block_6,224,249,9.8e-12	Rask_block_138,253,264,6.3e-05	Rask_block_50,272,299,7.3e-09	Rask_block_22,302,324,1.9e-10	Rask_block_8,349,382,7e-16	Rask_block_1,391,414,4.6e-11	Rask_block_24,429,470,2.3e-12	Rask_block_10,479,504,1.2e-11	Rask_block_459,507,518,2.3e-05	Rask_block_56,545,561,9.8e-05	Rask_block_28,589,598,0.18	Rask_block_21,612,636,5.5e-11
S_L6_19_Contig11000_frame_-2	Rask_block_13,4,25,7.4e-10	Rask_block_3,37,53,2.2e-08	Rask_block_446,54,65,1.9e-08	Rask_block_14,66,80,4e-06	Rask_block_64,92,104,6.8e-05	Rask_block_5,106,124,1e-11	Rask_block_36,128,153,3.7e-06	Rask_block_2,159,175,5.3e-13
NS_L1_80_Contig36383_frame_-3	Rask_block_3,9,26,7.4e-11	Rask_block_467,27,36,2.2e-05	Rask_block_14,38,60,6.6e-06	Rask_block_5,73,91,1.9e-11	Rask_block_183,105,117,2.8e-10	Rask_block_2,118,135,9.8e-11	Rask_block_59,136,156,0.0021	Rask_block_1,166,191,1.9e-10	Rask_block_62,205,227,0.0094	Rask_block_61,233,257,6e-16	Rask_block_18,265,283,4.6e-09	Rask_block_15,300,323,1.3e-09	Rask_block_4,342,358,9.6e-08	Rask_block_11,366,386,3.9e-12	Rask_block_16,391,406,0.0005	Rask_block_3,407,424,1.2e-08	Rask_block_27,439,449,0.17	Rask_block_5,460,479,0.0002	Rask_block_623,480,492,2.6e-09	Rask_block_94,499,518,2.3e-11	Rask_block_2,519,536,5.9e-11	Rask_block_59,537,559,3e-07	Rask_block_1,567,592,2.8e-12	Rask_block_62,602,623,0.034	Rask_block_61,630,654,1.1e-11	Rask_block_18,659,678,7.7e-09	Rask_block_15,695,719,1.5e-05	Rask_block_139,724,737,1e-05	Rask_block_4,739,755,2.3e-07	Rask_block_11,766,785,4.8e-08
NS_L6_24_Contig8720_frame_-1	Rask_block_1,2,15,0.0048	Rask_block_32,28,76,8.5e-14	Rask_block_10,95,121,1.6e-07	Rask_block_49,124,136,0.17	Rask_block_26,144,152,0.027	Rask_block_30,180,204,0.024	Rask_block_15,205,227,3.6e-06	Rask_block_35,233,249,8.5e-08
S_L7_20_Contig2951_frame_2	Rask_block_23,12,33,0.22	Rask_block_57,44,61,2e-08	Rask_block_116,66,76,0.011	Rask_block_8,81,113,1.6e-15	Rask_block_1,122,147,8.4e-11	Rask_block_32,158,192,8.6e-11	Rask_block_10,207,234,3e-10	Rask_block_52,253,270,0.032
S_L8_68_Contig6843_frame_2	Rask_block_3,1,18,6.2e-10	Rask_block_174,19,29,0.0042	Rask_block_436,58,68,0.31	Rask_block_5,69,87,2.3e-11	Rask_block_2,104,121,4.2e-11	Rask_block_59,122,142,3.2e-08	Rask_block_382,145,154,0.00031	Rask_block_1,155,180,9.1e-08	Rask_block_62,200,218,8.9e-07	Rask_block_61,228,254,2.7e-13	Rask_block_18,261,276,0.00082	Rask_block_557,278,294,0.016	Rask_block_15,295,319,2.1e-07	Rask_block_286,325,338,2.9e-09	Rask_block_4,339,356,5.9e-08	Rask_block_11,364,384,1.8e-08	Rask_block_16,393,406,0.015	Rask_block_3,407,423,7.1e-06	Rask_block_86,425,445,1.4e-05	Rask_block_5,457,476,7.5e-10	Rask_block_29,484,505,1e-05	Rask_block_2,513,528,1e-10	Rask_block_48,535,549,0.0058	Rask_block_1,557,582,4.1e-11	Rask_block_45,599,630,7.5e-10	Rask_block_18,651,669,0.0018	Rask_block_15,684,706,4.3e-05	Rask_block_35,712,728,3.1e-07	Rask_block_4,740,755,0.0002	Rask_block_165,763,778,0.062	Rask_block_11,780,800,5.4e-10	Rask_block_16,824,838,0.033	Rask_block_3,840,855,1.2e-07	Rask_block_177,878,887,0.0069	Rask_block_27,891,909,0.22	Rask_block_5,918,937,1.3e-10	Rask_block_29,967,989,4.5e-08	Rask_block_87,993,1006,0.00012	Rask_block_2,1008,1024,2.2e-07	Rask_block_12,1025,1044,1.4e-05	Rask_block_7,1051,1075,4.5e-09	Rask_block_1,1077,1102,3.2e-09	Rask_block_72,1103,1119,1.8e-05	Rask_block_9,1125,1149,1.4e-07	Rask_block_6,1163,1188,2.1e-12	Rask_block_243,1193,1205,0.0013	Rask_block_50,1207,1233,3.8e-08	Rask_block_22,1237,1259,1.4e-12	Rask_block_107,1261,1275,6.2e-07
NS_L7_29_Contig7952_frame_-3	Rask_block_12,4,23,1.7e-05	Rask_block_7,26,49,1e-07	Rask_block_1,53,78,6.1e-10	Rask_block_9,95,118,4.1e-08	Rask_block_6,132,155,1.7e-13	Rask_block_243,161,172,9.2e-05	Rask_block_50,174,201,2.2e-11	Rask_block_22,205,227,2.5e-11	Rask_block_107,229,240,1.5e-06	Rask_block_8,250,282,1.1e-14
NS_L7_44_Contig6675_frame_-3	Rask_block_1,10,35,1.4e-15	Rask_block_32,46,79,1.1e-14	Rask_block_10,94,121,5.1e-08	Rask_block_101,122,146,7.8e-10	Rask_block_52,150,167,0.018	Rask_block_65,173,208,6.5e-17	Rask_block_53,214,232,3.5e-06	Rask_block_4,244,260,1.2e-07	Rask_block_189,261,275,0.00019	Rask_block_13,278,299,2.8e-09	Rask_block_234,300,315,0.042	Rask_block_3,317,334,1.8e-10	Rask_block_146,335,346,0.00015	Rask_block_14,349,370,0.00049
S_L7_42_Contig5459_frm-3_orf0	Rask_block_65,41,71,2.2e-11	Rask_block_53,88,108,0.044	Rask_block_4,119,136,1e-08	Rask_block_13,150,171,1.5e-09	Rask_block_3,180,197,5.7e-11	Rask_block_544,198,206,0.022	Rask_block_14,210,218,0.23
NS_L7_44_Contig7837_frame_2	Rask_block_268,9,20,0.0044	Rask_block_6,24,47,4.9e-14	Rask_block_68,51,71,8.2e-09	Rask_block_23,72,95,1e-09	Rask_block_104,96,109,0.098	Rask_block_63,111,130,3.8e-09	Rask_block_110,137,151,2.1e-06	Rask_block_67,152,164,4.6e-06	Rask_block_333,168,179,0.00021	Rask_block_8,181,214,6.4e-16	Rask_block_1,225,250,5.4e-12	Rask_block_32,272,310,4.6e-13	Rask_block_10,324,351,1.6e-08	Rask_block_26,371,384,2.9e-07	Rask_block_30,399,425,0.00053	Rask_block_15,426,448,6.6e-05	Rask_block_35,454,469,1.3e-05	Rask_block_4,473,490,1.3e-05	Rask_block_106,508,521,0.001
NS_L8_59_Contig6355_frame_2	Rask_block_71,25,37,0.013	Rask_block_20,39,59,6.1e-09	Rask_block_17,63,94,1.1e-07	Rask_block_19,99,131,2.2e-16	Rask_block_4,138,155,3.1e-07	Rask_block_13,166,187,1e-10	Rask_block_188,188,200,1e-05	Rask_block_3,202,218,1.3e-07	Rask_block_54,219,233,9.5e-07	Rask_block_14,236,252,1.3e-05
NS_L7_29_Contig8010_frame_2	Rask_block_20,44,64,1.3e-09	Rask_block_17,70,100,0.00023	Rask_block_19,108,145,3.5e-16	Rask_block_4,151,168,7e-06	Rask_block_13,178,198,3.4e-07	Rask_block_494,200,211,2.9e-05	Rask_block_3,213,230,1.1e-06	Rask_block_54,231,245,0.00023	Rask_block_14,248,268,8.3e-08	Rask_block_5,285,303,6.7e-11	Rask_block_36,305,331,1.2e-09	Rask_block_153,333,339,0.0072	Rask_block_2,340,357,3.3e-12	Rask_block_12,358,374,2.3e-06	Rask_block_7,377,398,9e-09	Rask_block_1,403,428,2.4e-09	Rask_block_492,430,438,0.0012	Rask_block_34,442,459,0.036	Rask_block_9,463,490,7.7e-09	Rask_block_6,508,526,9.3e-09	Rask_block_143,532,548,0.22	Rask_block_23,550,573,6.7e-07	Rask_block_154,575,590,0.059	Rask_block_57,592,612,2.9e-07	Rask_block_626,613,621,0.0026	Rask_block_8,625,658,1e-17	Rask_block_1,669,695,4.6e-13	Rask_block_32,705,741,5.4e-14	Rask_block_10,776,802,9.1e-07	Rask_block_49,806,822,0.077	Rask_block_26,831,845,0.0002	Rask_block_30,870,895,0.067	Rask_block_15,896,916,0.15	Rask_block_35,922,938,1.5e-06	Rask_block_34,946,963,0.015	Rask_block_4,972,981,0.01
NS_L6_24_Contig8511_frame_1	Rask_block_35,6,22,4.4e-06	Rask_block_4,32,49,4.3e-06	Rask_block_81,68,85,0.001	Rask_block_11,87,107,3.9e-12	Rask_block_388,109,122,0.00018	Rask_block_16,127,143,3.4e-06	Rask_block_3,144,161,5.7e-09	Rask_block_253,163,171,7.8e-05	Rask_block_27,182,201,2.9e-05	Rask_block_5,213,232,8.6e-12
NS_L6_18_Contig15779_frame_-3	Rask_block_1,1,22,2.1e-09	Rask_block_24,36,76,1.4e-17	Rask_block_10,83,107,2.5e-12	Rask_block_271,112,119,0.0078	Rask_block_31,124,142,4.3e-06	Rask_block_56,146,164,2e-05	Rask_block_33,190,209,6.7e-05	Rask_block_21,215,236,2e-08
S_L7_16_48446_frame_-1	Rask_block_5,12,31,1.3e-10	Rask_block_222,32,49,1.1e-12	Rask_block_2,52,68,2.3e-10	Rask_block_48,69,89,1.2e-06	Rask_block_1,98,123,3.6e-08	Rask_block_414,124,149,2.8e-20	Rask_block_78,154,174,3e-11	Rask_block_30,179,200,0.032	Rask_block_21,207,232,1.8e-11
NS_L8_65_Contig1802_frame_1	Rask_block_156,10,22,1.5e-06	Rask_block_27,26,45,0.00025	Rask_block_5,69,86,1.2e-08	Rask_block_55,87,106,0.00051	Rask_block_29,110,133,4.5e-09	Rask_block_105,147,157,0.0023	Rask_block_2,159,175,3.5e-08	Rask_block_12,176,195,3.4e-06	Rask_block_7,198,222,5.3e-07	Rask_block_1,224,249,9.5e-12	Rask_block_72,251,261,0.011
NS_L1_88_Contig11773_frame_1	Rask_block_20,43,63,1.4e-07	Rask_block_17,71,96,1.2e-06	Rask_block_19,108,140,5.7e-14	Rask_block_4,148,163,8.1e-05	Rask_block_13,174,194,1.3e-07	Rask_block_102,196,208,0.0012	Rask_block_3,209,226,1.4e-06	Rask_block_54,227,241,0.0089	Rask_block_14,244,265,3.6e-07	Rask_block_64,272,286,0.00033	Rask_block_5,288,306,4.6e-08	Rask_block_36,308,336,1.3e-14	Rask_block_153,350,356,0.0094	Rask_block_2,357,374,4.4e-12	Rask_block_12,375,394,1.6e-08	Rask_block_7,395,420,5.9e-12	Rask_block_1,422,447,3.9e-11	Rask_block_70,448,476,1.4e-08	Rask_block_9,477,503,2.1e-07	Rask_block_118,504,518,2.7e-05	Rask_block_6,521,545,5e-11	Rask_block_23,569,589,0.0022	Rask_block_57,604,620,2e-05	Rask_block_116,624,635,0.0051	Rask_block_8,640,672,3e-11	Rask_block_1,681,706,5.5e-11	Rask_block_32,714,750,5.1e-11	Rask_block_10,765,790,0.0038	Rask_block_49,802,821,0.13	Rask_block_26,830,846,1.7e-07	Rask_block_30,860,878,0.023	Rask_block_15,879,902,9.5e-06	Rask_block_4,923,938,0.0001	Rask_block_165,941,956,0.00093	Rask_block_11,957,977,2.2e-09	Rask_block_77,978,995,7.9e-05	Rask_block_16,998,1013,0.00032	Rask_block_3,1014,1030,5.3e-08	Rask_block_27,1046,1062,0.018	Rask_block_5,1079,1097,9.6e-10	Rask_block_29,1120,1140,5.8e-05	Rask_block_619,1151,1167,6.5e-09	Rask_block_2,1168,1185,1.3e-08	Rask_block_12,1187,1205,5.2e-07	Rask_block_7,1206,1231,1.7e-11	Rask_block_1,1233,1249,0.00033
NS_L1_80_Contig32162_frame_-1	Rask_block_11,19,38,4.2e-07	Rask_block_3,46,62,1.3e-07	Rask_block_5,89,106,3e-11	Rask_block_213,107,123,0.00032	Rask_block_2,128,141,2.6e-08	Rask_block_48,144,163,1.2e-06	Rask_block_1,171,196,9.2e-06	Rask_block_45,203,228,1e-07	Rask_block_78,234,254,8.4e-10	Rask_block_95,269,286,9.9e-07	Rask_block_21,290,314,1.8e-10	Rask_block_41,316,339,9.7e-08
NS_L1_80_Contig32950_frame_-2	Rask_block_1,1,22,3.7e-08	Rask_block_24,31,71,2e-17	Rask_block_10,79,102,4.4e-08	Rask_block_31,118,135,2.6e-06	Rask_block_127,141,164,0.00014	Rask_block_366,202,211,0.0012
S_L8_56_32499_frame_-3	Rask_block_3,8,25,1.9e-08	Rask_block_524,29,38,3.9e-05	Rask_block_14,39,57,2.1e-08	Rask_block_64,71,83,4.8e-06	Rask_block_5,85,102,4.1e-10	Rask_block_60,114,138,8.5e-11	Rask_block_2,139,156,5.1e-12	Rask_block_12,157,175,1.2e-05	Rask_block_7,177,202,4.5e-12
NS_L8_59_Contig6428_frame_-1	Rask_block_8,1,27,4.7e-11	Rask_block_1,39,64,8.2e-11	Rask_block_32,73,108,7.7e-11	Rask_block_10,123,148,5.5e-05	Rask_block_347,167,178,1.3e-05	Rask_block_52,180,196,0.0044	Rask_block_65,202,238,1.4e-17	Rask_block_53,246,265,7.1e-06	Rask_block_558,268,274,0.017	Rask_block_4,276,293,4e-09	Rask_block_189,294,308,0.25	Rask_block_13,310,331,1.2e-07	Rask_block_3,349,366,6.1e-09	Rask_block_146,367,378,1.4e-06	Rask_block_14,379,402,3.7e-07	Rask_block_5,411,430,1.2e-10	Rask_block_2,444,461,1.2e-10	Rask_block_59,462,482,8.2e-06	Rask_block_1,495,520,7.9e-10	Rask_block_119,521,533,0.044	Rask_block_62,541,560,2.5e-05	Rask_block_61,579,604,1.3e-13	Rask_block_18,619,638,2e-08	Rask_block_15,655,678,2.1e-05	Rask_block_4,697,712,5.6e-08	Rask_block_11,723,743,3.6e-10	Rask_block_16,747,762,0.0012	Rask_block_3,763,779,3.1e-06	Rask_block_86,781,801,9.5e-07	Rask_block_5,816,835,6.8e-09	Rask_block_94,847,866,1.3e-05	Rask_block_2,868,885,5.9e-12	Rask_block_59,887,903,0.0068	Rask_block_579,906,920,0.00016	Rask_block_1,922,947,4.9e-07	Rask_block_45,962,1001,0.00018	Rask_block_18,1007,1025,4.3e-06	Rask_block_15,1045,1067,5.4e-06	Rask_block_35,1071,1087,3.6e-07	Rask_block_4,1098,1113,7.2e-05	Rask_block_11,1123,1143,2.8e-10	Rask_block_16,1182,1196,0.0021	Rask_block_3,1198,1215,2.1e-09	Rask_block_573,1216,1224,0.00066	Rask_block_82,1226,1246,0.00031	Rask_block_5,1271,1290,2.9e-12	Rask_block_55,1301,1318,5.7e-05	Rask_block_29,1334,1356,8.3e-08	Rask_block_87,1366,1380,4.6e-05
S_L7_16_Contig4293_frm3_orf12	Rask_block_20,24,45,2.1e-09	Rask_block_17,50,80,0.0018	Rask_block_19,86,116,1.7e-13	Rask_block_4,125,140,1.1e-05	Rask_block_13,151,172,3.8e-10	Rask_block_102,173,185,0.0045	Rask_block_3,186,203,1.6e-08	Rask_block_79,204,220,0.00015
NS_L1_84_Contig9273_frame_-2	Rask_block_125,12,28,4.7e-07	Rask_block_10,29,54,4.4e-10	Rask_block_49,68,83,0.037	Rask_block_26,84,100,1.3e-06	Rask_block_30,114,137,0.18	Rask_block_15,138,160,1.5e-06	Rask_block_35,163,176,1.7e-06	Rask_block_4,207,214,0.064
NS_L1_84_Contig270_frame_2	Rask_block_29,41,61,3.1e-06	Rask_block_2,93,109,2.1e-08	Rask_block_12,110,126,0.00012	Rask_block_7,129,153,1.9e-09	Rask_block_1,155,180,8.7e-10	Rask_block_72,181,194,6.5e-05	Rask_block_9,204,227,1.1e-05	Rask_block_6,241,265,1.4e-12	Rask_block_226,267,280,0.00013	Rask_block_50,285,313,1.8e-07	Rask_block_22,316,337,1.7e-12
NS_L7_27_Contig6917_frame_3	Rask_block_9,15,42,6.4e-07	Rask_block_118,43,57,6.5e-07	Rask_block_6,61,84,3.6e-16	Rask_block_150,92,105,0.023	Rask_block_23,107,129,3.5e-05	Rask_block_154,160,174,0.0044
NS_L1_80_Contig36431_frame_-2	Rask_block_2,1,10,0.0072	Rask_block_59,11,31,5.4e-10	Rask_block_1,45,70,6.6e-11	Rask_block_523,72,81,0.0011	Rask_block_62,83,104,0.00046	Rask_block_61,126,151,4.2e-14	Rask_block_18,157,174,9.2e-07	Rask_block_15,190,214,4.5e-07	Rask_block_74,220,234,0.0034	Rask_block_4,237,254,1.1e-05	Rask_block_11,262,282,2.4e-10	Rask_block_77,284,295,0.011	Rask_block_16,305,320,0.047	Rask_block_3,321,338,1.1e-10	Rask_block_27,341,360,0.0049	Rask_block_5,367,386,7.3e-08	Rask_block_96,401,422,1.4e-05	Rask_block_2,431,447,2.1e-11	Rask_block_12,448,467,4e-06	Rask_block_7,469,494,2.1e-09	Rask_block_1,496,521,3.6e-11	Rask_block_9,537,562,3.8e-05	Rask_block_6,574,598,2.4e-10	Rask_block_22,649,671,8.2e-13	Rask_block_440,672,686,0.0011	Rask_block_8,687,720,8.8e-15	Rask_block_1,729,754,6.9e-08	Rask_block_24,767,806,0.00027	Rask_block_10,813,835,0.0017	Rask_block_15,887,911,3.8e-08	Rask_block_74,913,925,0.0019	Rask_block_4,928,942,6.3e-07	Rask_block_11,957,977,1.2e-10	Rask_block_16,995,1008,0.00043	Rask_block_3,1009,1026,3.2e-08	Rask_block_82,1029,1049,0.00049	Rask_block_5,1059,1076,3.4e-10	Rask_block_167,1092,1107,3e-06	Rask_block_2,1109,1125,6.8e-11	Rask_block_48,1126,1146,0.00022	Rask_block_1,1155,1180,1.7e-08	Rask_block_45,1203,1228,6.2e-09	Rask_block_18,1240,1259,8.5e-07	Rask_block_52,1267,1284,0.029	Rask_block_123,1285,1305,3.1e-08	Rask_block_338,1307,1327,1.1e-12	Rask_block_53,1329,1349,5.8e-05	Rask_block_4,1360,1376,4.2e-09	Rask_block_13,1387,1405,0.063
S_L8_56_Contig2176_frame_2	Rask_block_62,10,33,3.3e-09	Rask_block_209,34,53,3.4e-10	Rask_block_61,56,81,2.3e-16	Rask_block_18,95,114,2.6e-10	Rask_block_15,131,154,2.4e-09	Rask_block_286,160,174,9e-09	Rask_block_4,175,190,8.1e-08
NS_L6_21_Contig12372_frame_-1	Rask_block_1,23,47,1.4e-09	Rask_block_423,48,59,0.00022	Rask_block_24,60,101,5.6e-13	Rask_block_10,106,133,6.4e-10	Rask_block_31,149,167,0.00015	Rask_block_56,170,184,0.00017	Rask_block_30,196,214,0.019	Rask_block_28,216,228,0.013	Rask_block_21,236,253,4.4e-07
NS_L8_55_Contig5855_frm3_orf208	Rask_block_1,5,18,0.02	Rask_block_497,32,40,0.068	Rask_block_9,45,66,1.6e-05	Rask_block_6,81,106,1.7e-11	Rask_block_173,107,118,0.011	Rask_block_50,126,153,2.9e-10	Rask_block_22,156,178,2.3e-12	Rask_block_107,180,194,7.5e-09	Rask_block_8,201,233,2.8e-17	Rask_block_1,242,267,8.7e-13	Rask_block_24,279,319,2.1e-16	Rask_block_10,326,353,8.6e-10	Rask_block_207,357,366,0.0034	Rask_block_31,378,399,0.0015	Rask_block_127,404,432,1.8e-05	Rask_block_21,474,499,1e-13
S_L8_68_Contig6727_frame_-3	Rask_block_2,1,13,1.7e-06	Rask_block_12,15,33,9.2e-09	Rask_block_7,37,60,1.4e-05	Rask_block_1,63,88,1.2e-11	Rask_block_72,89,105,4.4e-07	Rask_block_9,106,131,1.1e-08	Rask_block_6,149,173,4.2e-14	Rask_block_243,179,191,1e-06	Rask_block_50,192,205,0.002
NS_L7_32_Contig14837_frame_2	Rask_block_4,10,27,3.4e-06	Rask_block_11,52,72,3.3e-11	Rask_block_77,73,88,0.00019	Rask_block_16,106,122,3e-06	Rask_block_3,123,140,9e-09	Rask_block_253,142,148,0.07	Rask_block_27,151,169,0.017	Rask_block_461,170,183,0.00025	Rask_block_5,184,203,9.3e-12	Rask_block_55,212,231,0.00023	Rask_block_29,244,263,0.00011	Rask_block_87,267,280,0.0012	Rask_block_2,281,298,1.3e-08	Rask_block_12,299,317,5.9e-05	Rask_block_7,321,346,4.7e-10
NS_L7_32_Contig13932_frame_-1	Rask_block_26,8,17,1.1e-05	Rask_block_26,24,36,7.3e-05	Rask_block_101,43,60,0.055	Rask_block_33,75,89,0.22	Rask_block_134,93,101,0.1	Rask_block_30,113,138,0.0012	Rask_block_15,139,158,0.0074	Rask_block_35,163,178,8.8e-07	Rask_block_4,211,228,4.3e-06	Rask_block_81,235,254,1.2e-06	Rask_block_11,255,275,7.3e-12	Rask_block_77,276,293,3.9e-06	Rask_block_16,300,315,0.012	Rask_block_3,316,333,8.6e-11	Rask_block_27,352,370,0.0082	Rask_block_5,399,416,2.9e-10	Rask_block_90,417,430,0.0087	Rask_block_96,436,456,5.7e-05	Rask_block_2,463,480,6.9e-11	Rask_block_12,481,500,2e-07	Rask_block_7,502,514,0.0014
S_L8_68_Contig6825_frame_1	Rask_block_4,3,20,5.2e-07	Rask_block_11,46,66,2.8e-11	Rask_block_77,67,85,2.4e-05	Rask_block_16,90,106,6.6e-07	Rask_block_3,107,124,7.6e-08	Rask_block_82,129,142,0.0048	Rask_block_5,156,175,3.5e-10	Rask_block_96,184,205,1e-05	Rask_block_409,214,225,7.5e-05	Rask_block_2,227,243,6.6e-09	Rask_block_12,244,261,0.002	Rask_block_7,263,288,8.2e-08	Rask_block_1,290,315,3e-10	Rask_block_72,316,332,5.5e-05	Rask_block_9,333,356,6.4e-07	Rask_block_298,358,369,0.00038	Rask_block_6,370,395,4.4e-12	Rask_block_138,398,412,0.00079	Rask_block_50,416,443,1.7e-07	Rask_block_22,447,469,8.6e-13	Rask_block_172,471,482,3.7e-05	Rask_block_8,485,516,1.6e-13	Rask_block_1,526,546,4.8e-10
S_L8_68_Contig6410_frame_1	Rask_block_54,7,21,7.8e-07	Rask_block_14,24,47,0.0002	Rask_block_5,58,75,5.1e-13	Rask_block_92,96,113,1.8e-08	Rask_block_2,114,131,1.5e-10	Rask_block_99,132,163,3.7e-15	Rask_block_1,165,190,1.9e-08
NS_L6_21_Contig9986_frame_3	Rask_block_9,31,57,2.1e-09	Rask_block_6,72,91,3.3e-11	Rask_block_103,99,111,0.083	Rask_block_85,117,137,7.6e-08	Rask_block_22,147,164,0.068	Rask_block_83,166,177,7.4e-06	Rask_block_8,180,213,7e-11	Rask_block_1,220,245,2.6e-07	Rask_block_212,247,296,2.8e-11	Rask_block_15,388,410,3.4e-07	Rask_block_139,419,433,0.0082	Rask_block_4,436,452,3.3e-07	Rask_block_11,461,470,0.14
S_L3_13_Contig5919_frame_2	Rask_block_1,4,28,1.6e-13	Rask_block_9,55,81,2.7e-09	Rask_block_6,94,116,4.2e-15	Rask_block_150,125,142,1.8e-05	Rask_block_23,144,164,1.1e-05	Rask_block_57,178,191,0.00021
NS_L1_84_Contig10106_frame_-1	Rask_block_1,19,44,9.8e-11	Rask_block_492,45,53,0.0082	Rask_block_34,60,78,0.0098	Rask_block_9,82,108,1.5e-13	Rask_block_75,111,127,6e-06	Rask_block_6,143,167,1.1e-14	Rask_block_68,170,189,2.5e-11	Rask_block_23,192,214,8.1e-08	Rask_block_391,215,223,0.00026	Rask_block_63,245,266,2.9e-08	Rask_block_110,274,288,0.00047	Rask_block_67,289,300,7.6e-05	Rask_block_8,307,341,2.2e-16	Rask_block_1,352,378,7.6e-12	Rask_block_32,391,429,2.3e-13	Rask_block_560,439,453,2.7e-05	Rask_block_10,454,481,1.2e-07	Rask_block_101,485,511,1.4e-11	Rask_block_52,515,531,0.0028	Rask_block_65,536,570,1.4e-14	Rask_block_53,583,601,0.0082	Rask_block_4,613,628,1.4e-07	Rask_block_189,631,645,0.33	Rask_block_13,647,668,1.3e-07	Rask_block_234,669,684,0.4	Rask_block_3,686,703,1.2e-10	Rask_block_467,704,713,0.0025	Rask_block_14,715,737,5.8e-06	Rask_block_436,740,750,4.1e-05	Rask_block_5,751,768,2.2e-10	Rask_block_183,783,796,2.5e-08	Rask_block_2,797,814,1e-10	Rask_block_59,815,835,1e-08	Rask_block_382,838,847,0.2	Rask_block_1,848,873,1.1e-08	Rask_block_62,894,913,8.4e-08	Rask_block_61,923,948,5.1e-15
S_L3_13_Contig3878_frame_3	Rask_block_18,18,37,1.6e-07	Rask_block_15,46,68,6.9e-07	Rask_block_4,87,103,6.4e-09	Rask_block_11,113,133,1.3e-13	Rask_block_16,136,150,0.041	Rask_block_3,152,169,7.1e-09
NS_L1_84_Contig7840_frame_2	Rask_block_239,6,14,0.00024	Rask_block_34,17,33,0.00011	Rask_block_9,40,66,2e-11	Rask_block_350,69,86,2.5e-05	Rask_block_6,87,111,1.8e-14	Rask_block_68,113,133,1.6e-05	Rask_block_23,135,157,1e-06	Rask_block_104,158,167,0.3	Rask_block_63,174,194,7.6e-12	Rask_block_114,195,210,6.4e-08	Rask_block_67,212,224,3e-06	Rask_block_354,226,236,2.3e-06	Rask_block_8,238,269,4e-15	Rask_block_1,279,304,3.1e-14	Rask_block_299,311,323,0.00033	Rask_block_32,328,351,3.4e-07
S_L3_13_Contig4037_frame_3	Rask_block_20,25,47,1.2e-09	Rask_block_17,50,80,1.7e-05	Rask_block_19,83,120,2.4e-15	Rask_block_4,127,144,1.3e-06	Rask_block_13,151,172,1.1e-08	Rask_block_188,173,181,0.033	Rask_block_3,187,203,1.2e-06	Rask_block_79,204,219,6.5e-09	Rask_block_14,220,242,3.5e-05	Rask_block_210,246,258,0.00018	Rask_block_5,259,276,2.4e-09	Rask_block_36,282,307,4.8e-10	Rask_block_163,315,321,0.0063	Rask_block_2,322,339,3e-12	Rask_block_12,340,358,3.3e-06	Rask_block_7,362,387,2e-09	Rask_block_1,389,414,3.3e-11	Rask_block_34,422,441,0.00012	Rask_block_9,445,472,8.4e-13	Rask_block_75,475,491,8.3e-09	Rask_block_245,497,506,0.00021	Rask_block_6,510,534,9.2e-14	Rask_block_68,538,558,1.9e-09	Rask_block_23,560,582,6e-08	Rask_block_208,583,594,7.6e-06	Rask_block_63,600,620,1.7e-12	Rask_block_114,623,639,5.6e-06	Rask_block_67,641,652,7.6e-05	Rask_block_8,666,699,4.9e-17	Rask_block_1,708,733,3e-13	Rask_block_299,740,751,0.011	Rask_block_32,756,792,8.9e-16	Rask_block_10,807,833,4.5e-08	Rask_block_26,864,878,1.3e-05
S_L3_13_Contig5979_frame_1	Rask_block_20,38,59,9.7e-05	Rask_block_17,63,94,3.8e-05	Rask_block_19,97,130,9.8e-12	Rask_block_4,138,155,0.00016	Rask_block_13,164,185,7.6e-09	Rask_block_416,186,196,0.0001	Rask_block_3,197,214,4.6e-07	Rask_block_54,215,229,2.6e-06
S_L6_19_Contig12385_frame_3	Rask_block_8,1,23,4.1e-11	Rask_block_1,37,57,8.4e-10	Rask_block_24,72,108,1.2e-12	Rask_block_10,119,143,1.4e-12	Rask_block_271,153,158,0.25	Rask_block_31,159,178,4.3e-06	Rask_block_221,194,218,7.6e-06	Rask_block_33,221,241,0.0026	Rask_block_21,250,274,1.4e-13
NS_L6_21_Contig12243_frame_3	Rask_block_83,4,16,0.00022	Rask_block_8,18,53,1.7e-13	Rask_block_1,62,86,2.4e-12	Rask_block_24,99,139,4.9e-17	Rask_block_10,144,174,1e-08	Rask_block_543,175,184,4e-05	Rask_block_31,188,207,0.00015	Rask_block_56,209,229,0.00089	Rask_block_33,236,256,0.059
S_L3_13_Contig2233_frame_2	Rask_block_20,1,20,2e-06	Rask_block_17,25,56,5e-12	Rask_block_19,61,93,8.2e-14	Rask_block_4,100,115,3.2e-06	Rask_block_13,126,147,6.8e-08	Rask_block_3,158,175,1.3e-06	Rask_block_171,176,186,2.8e-05	Rask_block_14,189,210,3.1e-05	Rask_block_64,212,223,0.0028	Rask_block_5,225,242,2.6e-09	Rask_block_36,247,272,2.6e-08	Rask_block_2,279,296,2e-11	Rask_block_12,298,316,1.6e-05	Rask_block_7,320,345,4.4e-07
S_L8_56_Contig1855_frame_3	Rask_block_3,5,22,5.2e-09	Rask_block_98,23,41,8.4e-10	Rask_block_5,52,71,1.2e-08	Rask_block_519,72,91,6e-14	Rask_block_2,92,109,7.6e-11	Rask_block_48,110,130,2.9e-06	Rask_block_1,137,162,1.6e-09	Rask_block_45,179,210,6.1e-05	Rask_block_18,227,245,1.6e-06	Rask_block_28,250,261,0.0075
NS_L6_21_Contig12522_frame_-3	Rask_block_1,4,29,3.5e-10	Rask_block_122,32,45,0.0019	Rask_block_9,47,69,0.0017	Rask_block_178,71,88,1.6e-06	Rask_block_6,90,111,7.9e-10	Rask_block_477,116,138,4.3e-08	Rask_block_85,140,159,1.6e-05	Rask_block_22,164,186,8.3e-11	Rask_block_176,189,201,0.0032	Rask_block_8,203,235,4.5e-15	Rask_block_1,246,271,7e-12	Rask_block_24,283,322,1.1e-12	Rask_block_10,333,357,1.3e-06	Rask_block_318,393,481,1.4e-08	Rask_block_4,491,508,0.00014	Rask_block_13,519,538,0.00077	Rask_block_462,539,548,6.9e-05	Rask_block_3,549,566,4.3e-09	Rask_block_429,567,578,0.047	Rask_block_14,579,602,0.0032	Rask_block_5,613,632,1.2e-11	Rask_block_291,633,647,3e-07	Rask_block_92,648,665,6.1e-08	Rask_block_2,666,683,4.7e-10	Rask_block_99,684,716,3.8e-18	Rask_block_1,718,743,2.2e-09	Rask_block_534,744,753,2.7e-05	Rask_block_115,754,771,9.1e-06	Rask_block_93,775,792,1.5e-10	Rask_block_18,798,817,7.8e-09	Rask_block_124,819,833,1.9e-05	Rask_block_76,836,865,3.5e-07	Rask_block_4,871,886,1.1e-06	Rask_block_11,898,918,1.7e-08	Rask_block_3,925,941,4.4e-07	Rask_block_108,942,961,6.3e-08	Rask_block_5,973,992,3e-11	Rask_block_142,998,1012,2.3e-07	Rask_block_2,1017,1030,7.4e-08	Rask_block_48,1032,1052,4.3e-07	Rask_block_1,1061,1086,1.6e-05	Rask_block_78,1123,1144,4.6e-12	Rask_block_28,1147,1158,0.056	Rask_block_405,1161,1170,0.0012	Rask_block_21,1171,1196,1.4e-11
NS_L7_17_Contig4280_frame_3	Rask_block_11,10,30,6.9e-07	Rask_block_3,35,52,7.5e-10	Rask_block_108,53,67,0.0078	Rask_block_5,84,103,3e-12	Rask_block_142,109,123,0.00015	Rask_block_2,124,140,5e-08	Rask_block_48,142,162,7.4e-07	Rask_block_1,171,196,3.6e-07	Rask_block_414,197,214,0.0079	Rask_block_78,233,254,1.7e-07	Rask_block_28,277,284,0.0077	Rask_block_21,288,312,1.5e-11
S_L8_68_Contig6819_frame_-2	Rask_block_75,1,15,1.5e-07	Rask_block_125,17,27,0.16	Rask_block_6,30,53,8e-14	Rask_block_68,59,78,4.8e-09	Rask_block_23,79,102,5.4e-11	Rask_block_63,141,159,3.6e-09	Rask_block_114,162,177,0.0003	Rask_block_67,179,190,1.5e-05	Rask_block_333,193,204,0.034	Rask_block_8,206,239,9.6e-18	Rask_block_1,249,274,2.6e-12	Rask_block_32,295,333,1.2e-12	Rask_block_10,350,377,3.1e-08	Rask_block_49,391,407,0.006	Rask_block_26,417,431,0.0021	Rask_block_30,443,466,0.039
NS_L7_17_Contig2987_frame_1	Rask_block_126,9,26,9e-05	Rask_block_5,42,61,1.4e-10	Rask_block_293,66,78,5.4e-08	Rask_block_2,79,96,9.3e-11	Rask_block_48,97,116,1e-05	Rask_block_1,125,150,4.7e-06	Rask_block_45,156,182,1e-05	Rask_block_78,187,208,7e-14
S_L7_20_Contig1337_frame_2	Rask_block_15,7,31,2.4e-05	Rask_block_4,48,61,0.00061	Rask_block_11,77,97,2e-06	Rask_block_16,104,118,0.012	Rask_block_3,119,136,3.5e-09	Rask_block_86,137,157,3e-06	Rask_block_5,171,190,5.5e-12	Rask_block_29,200,219,1.6e-05	Rask_block_2,225,241,8.1e-11	Rask_block_59,242,262,1.4e-08	Rask_block_1,272,297,8.2e-08	Rask_block_62,312,333,3.2e-06
NS_L7_44_Contig8024_frame_-1	Rask_block_5,7,24,2.8e-09	Rask_block_133,25,50,1.8e-09	Rask_block_2,62,78,5.5e-11	Rask_block_48,79,98,4.1e-05	Rask_block_1,107,132,9.1e-10	Rask_block_45,150,181,1.3e-10	Rask_block_18,204,223,0.00084	Rask_block_318,231,311,1.9e-35	Rask_block_4,323,340,7.2e-07	Rask_block_13,349,370,4.2e-05	Rask_block_3,384,400,2.1e-07	Rask_block_14,414,433,4.3e-05	Rask_block_5,446,464,7e-11	Rask_block_275,467,481,0.0057	Rask_block_92,484,500,1.3e-06	Rask_block_2,501,518,2e-10	Rask_block_99,521,551,3.2e-05	Rask_block_1,553,578,9.3e-07	Rask_block_93,612,629,7.1e-06	Rask_block_18,644,660,7.6e-05	Rask_block_4,700,715,7.3e-05	Rask_block_3,784,798,3.7e-06	Rask_block_5,828,847,4.2e-08	Rask_block_2,871,886,2.1e-08	Rask_block_1,924,941,4.8e-05	Rask_block_45,957,973,0.028	Rask_block_18,983,996,0.0093	Rask_block_355,999,1024,8.9e-16	Rask_block_76,1042,1078,7e-10	Rask_block_4,1079,1091,0.00024	Rask_block_160,1099,1127,4.1e-12	Rask_block_3,1134,1150,0.00011	Rask_block_126,1152,1169,1.5e-07	Rask_block_5,1179,1195,3.9e-08	Rask_block_142,1205,1215,0.021	Rask_block_2,1216,1232,1.2e-10	Rask_block_48,1234,1253,0.0011	Rask_block_1,1263,1288,0.00023	Rask_block_45,1293,1320,4.3e-05	Rask_block_78,1324,1344,4.1e-09	Rask_block_21,1366,1388,1.7e-07	Rask_block_41,1392,1442,3.8e-31	Rask_block_128,1443,1450,0.0019
NS_L7_27_Contig4104_frame_2	Rask_block_32,21,64,1.9e-11	Rask_block_10,85,111,6e-08	Rask_block_26,140,156,1.7e-06	Rask_block_30,172,198,0.00016	Rask_block_15,199,219,1.6e-05	Rask_block_35,223,239,1.3e-06	Rask_block_4,243,252,0.0062
NS_L1_80_Contig9056_frame_-3	Rask_block_3,1,16,3.3e-06	Rask_block_204,17,27,1.2e-06	Rask_block_14,30,51,9.9e-09	Rask_block_64,57,69,0.092	Rask_block_5,71,89,4.6e-10	Rask_block_36,95,118,3.8e-06	Rask_block_2,124,140,5.7e-12	Rask_block_12,142,161,1.1e-06	Rask_block_7,165,189,6.6e-09	Rask_block_1,192,217,5.8e-10	Rask_block_70,218,250,4.2e-13	Rask_block_9,251,276,1.2e-08	Rask_block_413,278,291,1.1e-05	Rask_block_6,295,316,7.6e-09	Rask_block_23,340,361,0.0023	Rask_block_57,370,382,0.00051	Rask_block_116,393,404,0.0019	Rask_block_8,408,439,3.1e-16	Rask_block_1,446,471,3.2e-11	Rask_block_32,479,515,0.0023	Rask_block_10,527,553,2e-07
S_L7_20_Contig5355_frm-1_orf0	Rask_block_11,1,13,3.8e-05	Rask_block_16,20,34,0.0005	Rask_block_3,35,51,1.8e-09	Rask_block_86,53,75,0.00029	Rask_block_5,87,106,7.8e-11	Rask_block_29,113,133,9.7e-06	Rask_block_2,141,157,1e-12	Rask_block_59,158,176,0.0051	Rask_block_579,180,195,1.3e-07	Rask_block_1,196,221,3.1e-08	Rask_block_45,233,273,2.7e-10	Rask_block_18,280,298,3.2e-06	Rask_block_355,301,326,4e-14	Rask_block_21,345,369,4.7e-11	Rask_block_182,373,380,0.39	Rask_block_182,392,400,0.23
NS_L7_19_Contig10831_frame_-1	Rask_block_8,1,29,1e-08	Rask_block_1,38,63,4.4e-14	Rask_block_32,74,107,5e-08	Rask_block_10,122,149,3.1e-06	Rask_block_49,164,179,0.31	Rask_block_26,189,203,7.5e-06	Rask_block_15,237,259,7.2e-08	Rask_block_35,262,277,4.2e-06	Rask_block_132,293,308,0.16	Rask_block_4,313,329,1.2e-05	Rask_block_81,335,349,0.0046	Rask_block_11,350,370,6.3e-10	Rask_block_77,371,388,2.1e-06	Rask_block_16,395,410,0.021	Rask_block_3,411,428,3.3e-09	Rask_block_27,441,459,0.00042	Rask_block_5,471,490,9.7e-12	Rask_block_55,491,508,0.07	Rask_block_29,520,540,0.00023	Rask_block_460,544,553,1.6e-05
NS_L1_84_31564_frame_-2	Rask_block_2,1,14,4.3e-08	Rask_block_12,15,33,4e-07	Rask_block_7,38,58,1.3e-08	Rask_block_1,64,89,2.6e-07	Rask_block_492,92,99,0.004	Rask_block_184,107,121,0.00072	Rask_block_9,124,150,4.3e-09	Rask_block_6,168,188,9.3e-09	Rask_block_23,214,237,5.3e-08	Rask_block_57,248,257,0.003	Rask_block_116,273,285,0.00011	Rask_block_8,287,320,6.1e-16	Rask_block_1,329,354,7.8e-10	Rask_block_32,365,403,1.4e-14	Rask_block_125,413,422,0.15	Rask_block_10,423,450,1.1e-08	Rask_block_26,476,492,5.8e-06	Rask_block_30,503,526,0.37	Rask_block_15,528,551,0.00014	Rask_block_35,554,569,1.6e-05	Rask_block_4,582,599,6.8e-05	Rask_block_517,682,693,0.14	Rask_block_11,694,714,9.1e-11	Rask_block_109,715,733,0.0053	Rask_block_16,736,753,0.00042	Rask_block_3,754,769,1.2e-07	Rask_block_27,791,809,0.0018	Rask_block_5,822,841,1.6e-10	Rask_block_55,850,869,0.00014	Rask_block_29,878,898,3e-06	Rask_block_87,908,920,0.00076	Rask_block_2,921,937,1.3e-07	Rask_block_7,963,988,5.9e-11	Rask_block_1,990,1015,9.1e-09	Rask_block_72,1024,1038,4.3e-05	Rask_block_9,1042,1064,5.4e-07	Rask_block_6,1076,1099,1.2e-10	Rask_block_226,1101,1109,0.0065	Rask_block_50,1118,1142,9.1e-10	Rask_block_22,1146,1168,4.3e-14	Rask_block_107,1170,1184,3.4e-06	Rask_block_8,1185,1217,1.4e-16	Rask_block_1,1229,1252,7.2e-09	Rask_block_456,1254,1263,4.3e-05	Rask_block_24,1264,1305,3.9e-17	Rask_block_10,1311,1338,2.9e-11	Rask_block_195,1339,1350,1.7e-05	Rask_block_31,1353,1370,0.025	Rask_block_127,1376,1402,1.6e-07
S_L8_68_Contig4603_frame_2	Rask_block_2,1,12,6.5e-06	Rask_block_1,39,64,8.9e-07	Rask_block_45,79,112,1e-13	Rask_block_18,120,138,3.4e-05	Rask_block_33,139,159,0.00073	Rask_block_26,230,245,0.0005	Rask_block_15,271,293,2.5e-07	Rask_block_35,296,311,1.9e-06	Rask_block_4,340,357,3.4e-06	Rask_block_66,360,367,0.18	Rask_block_11,388,408,2.1e-10	Rask_block_77,409,422,1e-05	Rask_block_16,431,446,0.00023	Rask_block_3,447,464,5.9e-09	Rask_block_27,484,504,0.00054	Rask_block_5,514,533,9.4e-11	Rask_block_90,534,548,0.00011	Rask_block_29,552,563,0.11	Rask_block_2,578,595,6.7e-10	Rask_block_12,596,613,2.7e-05	Rask_block_7,616,641,4.6e-07	Rask_block_1,643,668,6.2e-11	Rask_block_151,669,686,0.084	Rask_block_9,689,712,0.0014	Rask_block_6,725,748,3.4e-09	Rask_block_149,750,766,0.013	Rask_block_50,774,795,0.0021	Rask_block_22,798,820,2.2e-10	Rask_block_276,821,835,7.8e-07	Rask_block_8,836,869,6.2e-18	Rask_block_1,878,903,7.2e-13	Rask_block_24,916,941,2.3e-08
NS_L8_54_Contig10450_frame_2	Rask_block_1,9,34,4.6e-11	Rask_block_34,41,60,3.2e-05	Rask_block_9,64,90,1.1e-06	Rask_block_75,94,110,2.3e-09	Rask_block_6,133,152,5.2e-13	Rask_block_68,158,178,2.6e-08	Rask_block_23,180,202,1.1e-07	Rask_block_208,203,214,6e-07	Rask_block_63,223,242,2.8e-10	Rask_block_288,249,260,0.0017	Rask_block_67,261,273,1.7e-05
S_L3_13_Contig7142_frame_-3	Rask_block_12,1,13,0.22	Rask_block_7,16,40,5.2e-10	Rask_block_1,43,68,1.9e-07	Rask_block_70,69,93,1.2e-08	Rask_block_9,94,120,8.2e-13	Rask_block_6,139,154,6.1e-10	Rask_block_23,182,205,2.3e-09	Rask_block_57,214,232,6.9e-08	Rask_block_8,246,275,3e-13
NS_L1_84_Contig9926_frame_1	Rask_block_19,2,21,2.1e-08	Rask_block_4,28,45,3e-09	Rask_block_13,54,75,5.3e-07	Rask_block_3,89,106,4.6e-07	Rask_block_54,107,121,4.2e-05	Rask_block_14,124,146,1.7e-07	Rask_block_5,159,176,2.5e-10	Rask_block_36,182,207,4.2e-12	Rask_block_88,213,219,0.0012	Rask_block_2,220,232,1.7e-07
S_L7_20_Contig4920_frame_1	Rask_block_4,3,19,1.6e-05	Rask_block_73,37,51,0.0011	Rask_block_11,56,76,1.1e-12	Rask_block_16,107,120,0.00039	Rask_block_3,121,138,1.5e-09	Rask_block_359,144,153,0.0011	Rask_block_27,156,176,8.2e-06	Rask_block_5,191,210,8.9e-10	Rask_block_29,248,268,1.8e-09	Rask_block_105,276,286,2.1e-06
NS_L7_32_Contig11321_frame_1	Rask_block_2,1,17,9.1e-12	Rask_block_12,22,37,0.00023	Rask_block_7,39,64,1.7e-12	Rask_block_1,66,90,1.4e-09	Rask_block_70,92,116,9.3e-08	Rask_block_9,117,142,4.5e-09	Rask_block_6,157,181,3.5e-14	Rask_block_23,206,229,1.7e-10	Rask_block_57,240,259,1.3e-08
NS_L7_27_Contig7034_frame_3	Rask_block_6,11,35,1.1e-11	Rask_block_138,37,51,3.5e-08	Rask_block_50,55,82,1.4e-11	Rask_block_22,86,108,6.9e-11	Rask_block_172,110,118,0.00057	Rask_block_8,124,156,1.8e-15	Rask_block_1,165,190,3.5e-11	Rask_block_24,201,242,2.9e-15	Rask_block_10,251,274,1.1e-06	Rask_block_31,288,304,0.0062	Rask_block_77,324,335,0.00058	Rask_block_21,398,422,2e-11
NS_L8_65_Contig3229_frame_1	Rask_block_20,55,77,2.3e-07	Rask_block_17,80,112,0.00016	Rask_block_19,123,157,8.1e-14	Rask_block_4,162,179,2.3e-07	Rask_block_13,187,208,1.3e-05	Rask_block_215,210,221,0.00018	Rask_block_3,223,239,7.9e-06	Rask_block_79,240,255,5.4e-08	Rask_block_14,256,277,5.3e-07	Rask_block_64,285,296,0.048	Rask_block_5,298,317,1.2e-09	Rask_block_36,319,350,1.2e-13	Rask_block_2,355,372,2.5e-12	Rask_block_12,374,392,3e-05	Rask_block_7,396,420,9.7e-09	Rask_block_1,423,447,2e-08	Rask_block_34,453,471,0.0089	Rask_block_9,478,504,3.5e-10	Rask_block_75,508,524,0.00032	Rask_block_6,529,553,2.6e-13	Rask_block_143,555,571,2.7e-06	Rask_block_23,572,595,3e-08	Rask_block_57,634,654,8.6e-08	Rask_block_223,655,664,0.0025	Rask_block_8,668,700,2.7e-15	Rask_block_1,708,733,7.3e-09	Rask_block_32,750,787,1e-12	Rask_block_10,806,832,3.9e-06	Rask_block_30,865,885,0.025	Rask_block_15,906,927,2.8e-05	Rask_block_35,932,947,3.6e-06	Rask_block_4,979,996,3e-06	Rask_block_11,1018,1038,2.6e-09	Rask_block_77,1039,1056,0.00033	Rask_block_16,1062,1077,0.0027	Rask_block_3,1078,1095,3.5e-05	Rask_block_5,1125,1144,4e-10	Rask_block_55,1152,1171,1.3e-05	Rask_block_96,1190,1207,9.6e-05	Rask_block_2,1216,1233,1.6e-10	Rask_block_12,1234,1250,0.0032	Rask_block_7,1253,1277,3.7e-07	Rask_block_1,1279,1304,5.5e-08	Rask_block_9,1320,1343,0.011	Rask_block_6,1356,1381,4.9e-10	Rask_block_50,1403,1430,6.7e-09	Rask_block_22,1433,1455,5.6e-12	Rask_block_172,1457,1469,1e-05	Rask_block_8,1476,1508,1.9e-12
NS_L7_44_Contig10192_frame_-3	Rask_block_20,33,54,1.4e-10	Rask_block_17,57,87,1.9e-09	Rask_block_19,91,124,2.8e-13	Rask_block_4,130,147,5.6e-08	Rask_block_13,154,175,2.4e-09	Rask_block_102,176,188,1.5e-05	Rask_block_3,189,206,6.6e-07	Rask_block_79,207,222,1.9e-09	Rask_block_14,223,243,2.4e-08	Rask_block_64,248,261,0.00062	Rask_block_5,263,280,1.5e-11	Rask_block_36,286,316,1.2e-12	Rask_block_88,317,323,0.0018	Rask_block_2,324,334,0.00011
S_L8_68_Contig4195_frame_1	Rask_block_184,1,21,0.0003	Rask_block_9,24,50,2.7e-10	Rask_block_6,71,94,1.7e-13	Rask_block_23,119,142,3.9e-06	Rask_block_57,156,175,0.063	Rask_block_8,185,217,6.6e-15	Rask_block_1,227,252,1.2e-09	Rask_block_32,260,296,4.1e-13
NS_L1_95_Contig9278_frame_3	Rask_block_4,17,34,1.8e-06	Rask_block_13,52,73,1.6e-09	Rask_block_3,93,110,1.4e-10	Rask_block_467,111,120,8.9e-05	Rask_block_14,122,145,0.0016	Rask_block_5,155,172,7.2e-10	Rask_block_589,182,194,1.2e-05	Rask_block_2,195,212,3.5e-11	Rask_block_59,214,232,1.9e-05	Rask_block_1,250,275,3.2e-09	Rask_block_119,276,288,3.6e-05	Rask_block_62,292,314,8.3e-08	Rask_block_61,325,350,1.1e-12	Rask_block_18,355,374,2.3e-08	Rask_block_26,405,419,9.2e-06	Rask_block_30,441,466,0.0018	Rask_block_15,467,488,2.8e-05	Rask_block_35,493,506,5.6e-05	Rask_block_132,523,535,0.17	Rask_block_4,536,553,1.4e-05	Rask_block_165,571,584,0.0043	Rask_block_11,586,606,3.8e-10	Rask_block_16,627,641,0.022	Rask_block_3,643,660,1.5e-09	Rask_block_252,661,671,1.2e-06	Rask_block_452,678,692,0.00053	Rask_block_5,719,738,2.1e-10	Rask_block_96,765,784,1.9e-06	Rask_block_2,794,811,4.6e-08	Rask_block_12,812,829,0.012	Rask_block_7,836,861,1.1e-08	Rask_block_1,863,888,1e-08	Rask_block_72,890,905,0.18	Rask_block_9,912,933,0.0036	Rask_block_6,946,969,1.3e-12	Rask_block_243,973,984,0.00016	Rask_block_50,987,1014,1.8e-11	Rask_block_22,1017,1039,1.3e-11	Rask_block_287,1042,1057,0.00034	Rask_block_8,1058,1076,3.3e-05
NS_L8_59_Contig5471_frame_3	Rask_block_61,1,14,9.7e-06	Rask_block_18,23,40,0.032	Rask_block_557,45,57,0.007	Rask_block_101,68,76,0.099	Rask_block_52,85,102,0.004	Rask_block_65,113,147,2.4e-14	Rask_block_53,155,173,7.3e-06
NS_L7_44_24475_frame_1	Rask_block_19,1,32,9e-15	Rask_block_4,44,61,8.8e-09	Rask_block_13,71,92,8.5e-11	Rask_block_215,95,105,0.00025	Rask_block_3,107,123,8.5e-07	Rask_block_79,124,139,2.2e-08	Rask_block_14,140,154,9.3e-05	Rask_block_64,165,177,0.00027	Rask_block_5,179,197,8.6e-10	Rask_block_36,204,235,2.4e-15	Rask_block_2,240,250,8e-05
NS_L8_50_Contig5452_frame_-3	Rask_block_20,3,24,2.4e-07	Rask_block_17,28,59,2.4e-08	Rask_block_19,62,95,4.8e-14	Rask_block_4,102,119,4.5e-06	Rask_block_13,128,149,8.8e-09	Rask_block_416,150,160,1.2e-06	Rask_block_3,161,178,1.9e-07	Rask_block_54,179,191,0.00038	Rask_block_14,192,211,8.1e-05
NS_L1_84_Contig8146_frame_3	Rask_block_1,2,19,1.8e-05	Rask_block_24,31,72,1.4e-10	Rask_block_10,80,105,8.9e-12	Rask_block_195,115,126,4.1e-05	Rask_block_31,127,144,7.4e-07	Rask_block_56,148,165,0.0042	Rask_block_21,207,225,1.7e-05
S_L6_19_Contig12457_frame_-3	Rask_block_16,3,19,0.0028	Rask_block_3,20,35,2.1e-06	Rask_block_27,42,59,0.00042	Rask_block_5,86,105,1.3e-10	Rask_block_55,109,128,0.00012	Rask_block_29,151,172,3.1e-07	Rask_block_2,188,204,2.4e-08	Rask_block_12,206,225,0.00024	Rask_block_7,227,249,0.0009	Rask_block_1,253,278,7.3e-11	Rask_block_72,280,295,3.4e-05	Rask_block_9,297,319,0.0026	Rask_block_244,323,333,0.33	Rask_block_6,334,359,5.3e-12	Rask_block_138,360,374,0.00012	Rask_block_50,379,405,2.6e-09	Rask_block_22,410,432,1.5e-10	Rask_block_107,434,446,1.1e-06	Rask_block_8,455,487,8.9e-15	Rask_block_1,496,521,6.4e-12	Rask_block_24,531,572,3.9e-16	Rask_block_10,578,605,1.3e-10	Rask_block_31,618,635,1.6e-07	Rask_block_56,638,658,0.00038	Rask_block_137,669,679,0.00056	Rask_block_120,681,688,0.19	Rask_block_21,689,714,9.2e-11
NS_L7_32_Contig13912_frame_2	Rask_block_50,1,29,9.3e-07	Rask_block_22,32,54,8.3e-14	Rask_block_417,56,64,0.00031	Rask_block_8,72,104,2.2e-17	Rask_block_1,115,140,3.1e-12	Rask_block_24,153,193,1.8e-16	Rask_block_10,200,226,1.5e-08	Rask_block_271,229,238,5.9e-06	Rask_block_31,242,260,4.2e-07	Rask_block_56,262,280,1.3e-05	Rask_block_28,293,304,0.0031	Rask_block_21,332,357,1.4e-13
[truncated: 6,173 more rows]
[truncated: 81 more columns]

## Sheet: thill domain
Transcript	Annotation 1	Annotation 2	Annotation 3	Annotation 4	Annotation 5	Annotation 6	Annotation 7	Annotation 8
NS_L7_29_Contig7986_frame_-1	IFM26_S8_Contig648_frame_-2_CIDRb4_domNum2,32,277,2.1e-78,NA
S_L8_68_Contig6018_frame_-2	IFC66_S31_L002_Contig1860_frame_1_DBLb11_domNum2,67,558,0.0,NA	SFC16_S6_L001_Contig1789_frm-2_orf5_DBLg1_domNum5,582,936,8.3e-222,NA	IFC66_S31_L002_Contig1860_frame_1_DBLe1_domNum4,955,1313,1.1e-221,NA
NS_L6_21_Contig3455_frame_1	IFM26_S8_Contig222_frame_-3_DBLe2_domNum1,1,150,1.1e-41,NA	IFM26_S8_Contig222_frame_-3_DBLe7_domNum2,162,245,8.3e-26,NA
NS_L7_44_Contig6987_frm1_orf5	SFC16_S6_L001_Contig1789_frm-2_orf5_DBLa1.1_domNum2,87,485,5e-252,NA	SFC16_S6_L001_Contig1789_frm-2_orf5_CIDRa1.2_domNum3,486,737,6.6e-157,NA	SFM-1_S11_L001_5068_soapGraphK61_frame_-2_DBLb11_domNum2,746,1235,7.5e-298,NA	SFC16_S6_L001_Contig1789_frm-2_orf5_DBLg1_domNum5,1259,1613,1.2e-212,NA
NS_L1_84_Contig9353_frame_-3	SFC22_S9_L001_Contig2114_frame_1_CIDRa2.4_domNum2,1,218,2e-78,NA	IFM-049_S6_Contig41218_frame_-1_DBLd1_domNum3,313,801,1.7e-145,NA
S_L7_20_39453_frame_2	IFM12_S16_Contig821_frame_3_CIDRb1_domNum1,1,91,1.4e-29,NA
[truncated: 6,407 more rows]

## Sheet: thill segment
Transcript	Annotation 1	Annotation 2	Annotation 3	Annotation 4	Annotation 5	Annotation 6	Annotation 7	Annotation 8	Annotation 9	Annotation 10	Annotation 11	Annotation 12	Annotation 13	Annotation 14	Annotation 15	Annotation 16	Annotation 17	Annotation 18	Annotation 19	Annotation 20	Annotation 21	Annotation 22	Annotation 23	Annotation 24	Annotation 25	Annotation 26	Annotation 27	Annotation 28	Annotation 29	Annotation 30	Annotation 31	Annotation 32	Annotation 33	Annotation 34	Annotation 35	Annotation 36	Annotation 37	Annotation 38	Annotation 39	Annotation 40	Annotation 41	Annotation 42	Annotation 43	Annotation 44	Annotation 45	Annotation 46	Annotation 47	Annotation 48	Annotation 49
[truncated: 6,405 more rows]
[truncated: 58 more columns]
