# Supplementary material for: Gene expression profiling of malaria parasites reveals common virulence gene expression in adult first-time infected patients and severe cases
Source: bioRxiv preprint, doi:10.1101/2020.11.13.381137, version 3 (2021-03-23)
Supplement: Table S7 [file 381137_file24.xlsx]

## Sheet: final
					Hits against var database Otto et al. with identity > 99%		Hits against var genes from PacBio references Otto et al. (> 1kb overlap and identity > 98%)
Contig ID	Patient ID	Length in bp	Mapped reads on contig	RPKM	# Hits with overlap > 500 bp	# Hits > 500 bp and overlap 80% of contigs		Rask domain prediction	Rask block prediction
NS_L8_50_21122	#10	1170	113	2.57209				DBLd1-CIDRb1-	block_3-block_27-block_5-block_55-block_29-block_87-block_2-block_12-block_7-block_1-block_9-block_244-block_6-block_180-block_50-block_22-
NS_L8_50_Contig1847	#10	8254	6379	20.5817	33			NTSpam-DBLpam1-DBLpam2-CIDRpam-DBLpam3-DBLepam4-DBLepam5-DBLe10-	block_309-block_65-block_302-block_4-block_13-block_3-block_131-block_5-block_303-block_60-block_2-block_312-block_1-block_351-block_115-block_335-block_13-block_620-block_3-block_325-block_14-block_5-block_328-block_2-block_343-block_18-block_344-block_342-block_1-block_329-block_4-block_307-block_484-block_3-block_314-block_5-block_313-block_2-block_306-block_428-block_1-block_305-block_4-block…
NS_L8_50_Contig2108	#10	690	35	1.35087				DBLa0.15-	block_7-block_12-block_2-block_60-block_5-block_14-block_54-block_3-block_381-block_13-
NS_L8_50_Contig2189	#10	1046	73	1.85859				CIDRa3.4-DBLd1-	block_73-block_4-block_132-block_35-block_15-block_26-block_49-block_10-block_447-block_32-block_512-block_1-
NS_L8_50_Contig2340	#10	502	25	1.32626				DBLb10-DBLd1-	block_61-block_18-block_15-block_35-block_34-block_4-
NS_L8_50_Contig2618	#10	788	57	1.92638	2	2		DBLa0.5-CIDRa2.10-	block_2-block_12-block_7-block_1-block_34-block_9-block_75-block_6-block_23-block_154-
NS_L8_50_Contig28	#10	580	59	2.70905	2	2		CIDRg2-	block_1-block_24-block_10-block_31-block_52-
NS_L8_50_Contig3151	#10	1024	64	1.66446	2	1		DBLb2-DBLg5-	block_16-block_11-block_4-block_15-block_77-block_18-block_61-block_62-block_1-block_59-block_2-block_499-
NS_L8_50_Contig3237	#10	514	31	1.60617	8	8
NS_L8_50_Contig3321	#10	515	49	2.53386	8	8		DBLa0.19-	block_2-block_36-block_5-block_64-block_14-block_79-block_3-block_13-
NS_L8_50_Contig3676	#10	525	24	1.21743	8	8		DBLb3-	block_14-block_272-block_3-block_13-block_4-block_53-
NS_L8_50_Contig3696	#10	542	17	0.835301	55	55			block_10-block_224-block_31-block_56-block_127-block_28-block_21-
NS_L8_50_Contig3726	#10	543	38	1.86371				DBLa0.11-	block_36-block_5-block_64-block_14-block_79-block_3-block_381-block_13-
NS_L8_50_Contig3741	#10	656	57	2.31401	17	17		DBLe2-DBLz3-	block_363-block_52-block_315-block_4-block_13-block_3-
NS_L8_50_Contig3752	#10	549	12	0.582106				DBLb5-	block_52-block_65-block_53-block_4-block_290-block_13-block_3-block_146-
NS_L8_50_Contig3802	#10	570	16	0.747547	105	105		DBLa0.8-CIDRa5-	block_57-block_23-block_6-block_9-block_34-block_1-
NS_L8_50_Contig3838	#10	585	34	1.54781				DBLd1-CIDRb1-	block_9-block_244-block_6-block_50-block_22-block_107-block_8-
NS_L8_50_Contig3872	#10	1126	132	3.12197				CIDRb1-CIDRa3.1-	block_173-block_50-block_22-block_107-block_8-block_1-block_10-block_459-block_31-block_56-block_137-block_21-
NS_L8_50_Contig3973	#10	995	111	2.97094	9			CIDRa3.2-DBLd1-	block_34-block_35-block_15-block_30-block_26-block_10-block_32-block_1-block_8-block_572-
NS_L8_50_Contig3975	#10	664	53	2.1257				DBLa0.8-CIDRa3.5-	block_1-block_184-block_9-block_75-block_6-block_68-block_23-block_63-
NS_L8_50_Contig4095	#10	1113	68	1.62707	5	5		CIDRa2.6-DBLb5-	block_59-block_2-block_5-block_14-block_146-block_3-block_13-block_4-block_53-block_65-block_52-block_10-block_560-
NS_L8_50_Contig4152	#10	817	36	1.17348	1	1		CIDRa5-DBLb5-	block_32-block_10-block_52-block_65-block_53-block_4-block_319-block_13-
NS_L8_50_Contig4193	#10	861	52	1.6084	440	356		DBLa1.3-DBLe8-	block_76-block_18-block_93-block_592-block_1-block_99-block_2-block_92-block_5-
NS_L8_50_Contig4415	#10	1191	56	1.25219	26	22	PfSD01_070029000	DBLz6-DBLe6-	block_2-block_99-block_1-block_592-block_93-block_18-block_124-block_76-block_4-block_11-block_3-block_108-block_5-block_213-block_2-
NS_L8_50_Contig4928	#10	635	44	1.84532	1			DBLa0.15-	block_14-block_64-block_5-block_36-block_163-block_2-block_12-block_7-block_1-
NS_L8_50_Contig5292	#10	565	32	1.50833				DBLz6-	block_13-block_4-block_53-block_235-block_123-block_52-block_31-block_10-
NS_L8_50_Contig5336	#10	1241	223	4.78549	1			DBLd5-CIDRb1-	block_28-block_31-block_10-block_24-block_1-block_8-block_159-block_22-block_50-block_173-block_6-
NS_L8_50_Contig5357	#10	964	78	2.15482				DBLd1-	block_106-block_11-block_158-block_16-block_3-block_437-block_177-block_27-block_5-block_55-block_448-block_29-block_87-block_2-
NS_L8_50_Contig5394	#10	706	55	2.07468	4	4		DBLd1-	block_3-block_16-block_11-block_4-block_35-block_15-block_30-block_26-
NS_L8_50_Contig5397	#10	572	58	2.70038				DBLd7-CIDRb1-	block_107-block_22-block_50-block_6-block_9-block_72-
NS_L8_50_Contig5406	#10	2108	309	3.90374				CIDRa5-DBLd1-	block_23-block_57-block_8-block_1-block_32-block_10-block_49-block_26-block_30-block_15-block_35-block_4-block_11-block_16-block_3-block_27-block_5-block_249-block_29-block_105-block_2-
NS_L8_50_Contig5414	#10	503	22	1.16479				CIDRg1-	block_6-block_148-block_22-block_8-block_1-
NS_L8_50_Contig5416	#10	1778	249	3.72959				DBLd1-CIDRb5-	block_21-block_33-block_56-block_31-block_10-block_24-block_1-block_8-block_172-block_22-block_50-block_6-block_244-block_9-block_72-block_1-block_7-block_12-block_2-
NS_L8_50_Contig5417	#10	507	21	1.10307				DBLa0.13-	block_19-block_4-block_13-block_215-block_3-block_79-block_14-block_64-block_5-
NS_L8_50_Contig5424	#10	2743	645	6.26221				DBLd1-CIDRb1-	block_35-block_4-block_81-block_11-block_16-block_3-block_27-block_5-block_55-block_29-block_87-block_2-block_12-block_7-block_1-block_72-block_9-block_6-block_50-block_22-block_8-block_1-block_24-block_10-block_31-block_56-block_33-block_21-
NS_L8_50_Contig5425	#10	515	19	0.982517				DBLg9-	block_45-block_18-block_355-block_21-
NS_L8_50_Contig5448	#10	551	40	1.93331	25	25		DBLe4-	block_21-block_294-block_33-block_78-block_45-block_1-block_48-
NS_L8_50_Contig5452	#10	640	51	2.12219	371	371		NTSB-DBLa0.4-	block_14-block_54-block_3-block_416-block_13-block_4-block_19-block_17-block_20-
NS_L8_50_Contig5466	#10	608	49	2.14628				DBLe6-	block_5-block_213-block_2-block_48-block_1-block_45-block_78-block_529-block_28-
NS_L8_50_Contig5468	#10	616	60	2.59396	2	2		NTSB-DBLa0.16-	block_194-block_20-block_17-block_19-block_4-block_13-block_215-
NS_L8_50_Contig5471	#10	882	52	1.5701				CIDRa2.4-DBLd1-	block_73-block_4-block_35-block_15-block_205-block_26-block_10-block_32-block_1-block_8-
NS_L8_50_Contig5473	#10	628	20	0.848133	3	3		DBLe12-	block_531-block_21-block_95-block_274-block_97-block_200-block_2-block_142-
NS_L8_50_Contig5475	#10	662	62	2.49418	1	1		CIDRg10-	block_1-block_24-block_10-block_491-block_31-block_127-block_33-
NS_L8_50_Contig5477	#10	643	31	1.28394				DBLd1-	block_1-block_7-block_12-block_2-block_96-block_90-block_5-block_27-block_185-block_3-
NS_L8_50_Contig5484	#10	664	18	0.721935				DBLd1-	block_11-block_109-block_16-block_3-block_27-block_461-block_5-block_55-block_29-block_87-
NS_L8_50_Contig5487	#10	877	81	2.45968				DBLa0.13-	block_34-block_1-block_7-block_12-block_2-block_88-block_36-block_5-block_64-block_14-block_79-block_3-block_494-block_13-
NS_L8_50_Contig5500	#10	711	58	2.17246	3	3		DBLb5-	block_61-block_209-block_62-block_1-block_59-block_2-block_499-block_5-block_436-block_14-
NS_L8_50_Contig5502	#10	989	73	1.96571	94	4			block_43-block_41-block_21-block_33-block_254-block_56-block_31-block_10-
NS_L8_50_Contig5505	#10	796	35	1.17098	23	22		NTSB-DBLa0.1-	block_14-block_79-block_3-block_13-block_4-block_19-block_17-block_20-
NS_L8_50_Contig5508	#10	735	52	1.88412				DBLd1-	block_3-block_16-block_289-block_11-block_4-block_34-block_35-block_15-block_30-block_26-
NS_L8_50_Contig5524	#10	855	82	2.55412				DBLd1-	block_9-block_72-block_1-block_7-block_12-block_2-block_105-block_29-block_5-block_82-block_573-
NS_L8_50_Contig5534	#10	965	216	5.96101
NS_L8_50_Contig5548	#10	5099	2454	12.8169	12			NTSB-DBLa0.8-CIDRa3.1-DBLd1-CIDRb1-	block_20-block_17-block_19-block_4-block_13-block_215-block_3-block_171-block_14-block_210-block_5-block_36-block_163-block_2-block_12-block_7-block_1-block_34-block_9-block_118-block_6-block_68-block_23-block_71-block_49-block_26-block_15-block_35-block_4-block_11-block_109-block_16-block_3-block_27-block_5-block_55-block_29-block_2-block_12-block_7-block_1-block_72-block_9-block_6-block_173-blo…
NS_L8_50_Contig5549	#10	1575	328	5.54609	1	1		DBLd1-CIDRb1-	block_21-block_28-block_56-block_31-block_195-block_10-block_24-block_1-block_8-block_107-block_22-block_50-block_6-block_9-block_72-block_1-block_7-block_12-block_2-
NS_L8_50_Contig5562	#10	1405	119	2.25561	30			CIDRg1-DBLe2-	block_48-block_2-block_415-block_5-block_265-block_3-block_11-block_4-block_261-block_537-block_31-block_10-block_24-block_1-block_8-
NS_L8_50_Contig5580	#10	2635	335	3.38577	7			DBLa0.16-CIDRa3.4-CIDRa3.1-DBLd1-	block_3-block_16-block_289-block_11-block_4-block_35-block_15-block_26-block_10-block_168-block_32-block_1-block_8-block_354-block_67-block_110-block_63-block_104-block_23-block_68-block_6-block_186-block_9-block_34-block_1-block_7-block_12-block_2-block_36-block_5-block_14-
NS_L8_50_Contig5582	#10	3210	837	6.94407	33	4		CIDRa3.1-DBLd1-CIDRg4-	block_1-block_32-block_10-block_26-block_15-block_35-block_132-block_4-block_11-block_16-block_3-block_228-block_27-block_5-block_55-block_29-block_87-block_2-block_12-block_7-block_1-block_122-block_9-block_178-block_6-block_103-block_85-block_22-block_83-block_8-block_1-block_554-block_24-block_10-block_31-block_33-block_21-
NS_L8_50_Contig5591	#10	684	48	1.86887	1	1		CIDRa2.8-	block_32-block_1-block_8-block_526-block_57-block_23-block_251-block_6-
NS_L8_50_Contig5636	#10	1258	153	3.23895	2	1		DBLd1-CIDRb1-	block_374-block_10-block_24-block_1-block_8-block_107-block_22-block_50-block_180-block_6-block_9-block_497-block_1-block_7-block_12-block_2-
NS_L8_50_Contig5714	#10	544	27	1.32178				DBLd1-	block_177-block_27-block_5-block_55-block_29-block_87-block_2-
NS_L8_50_Contig6226	#10	573	25	1.16193	4	4		CIDRa6-	block_68-block_23-block_8-block_1-block_32-
NS_L8_50_Contig6246	#10	507	24	1.26066				DBLa0.19-CIDRa2.3-	block_8-block_57-block_23-block_143-block_6-block_118-block_9-
NS_L8_50_Contig6261	#10	529	16	0.805486				DBLd4-CIDRg1-	block_9-block_6-block_148-block_22-block_8-
NS_L8_50_Contig6286	#10	533	20	0.999301	7	7		DBLd3-CIDRg2-	block_9-block_518-block_6-block_477-block_85-block_22-block_176-block_8-
NS_L8_50_Contig6329	#10	901	27	0.798054	6	6		DBLg10-	block_45-block_1-block_579-block_48-block_2-block_29-block_5-block_86-block_3-block_16-block_11-
NS_L8_50_Contig6359	#10	620	51	2.19064	34	34		CIDRa2.4-	block_57-block_116-block_8-block_1-block_32-block_10-
NS_L8_50_Contig6403	#10	687	59	2.28712	7	7		DBLg3-DBLz4-	block_53-block_338-block_123-block_52-block_18-block_45-block_1-block_48-
NS_L8_50_Contig6423	#10	5852	5207	23.6961	8			NTSB-DBLa0.12-CIDRa2.11-DBLd1-CIDRb1-	block_20-block_17-block_19-block_4-block_13-block_188-block_3-block_54-block_14-block_64-block_5-block_36-block_2-block_12-block_7-block_1-block_70-block_9-block_118-block_6-block_23-block_57-block_8-block_1-block_32-block_10-block_49-block_26-block_530-block_15-block_35-block_34-block_4-block_106-block_11-block_289-block_16-block_3-block_5-block_55-block_369-block_29-block_2-block_12-block_1-blo…
NS_L8_50_Contig6446	#10	816	35	1.14228				DBLg5-DBLd4-DBLd5-	block_2-block_136-block_1-block_45-block_257-block_15-block_74-block_4-block_4-
NS_L8_50_Contig6551	#10	3973	907	6.0797	84	2		DBLb2-DBLg13-DBLz1-DBLe14-	block_61-block_481-block_18-block_15-block_4-block_11-block_16-block_3-block_86-block_5-block_2-block_48-block_1-block_45-block_18-block_550-block_19-block_4-block_13-block_545-block_3-block_14-block_5-block_549-block_92-block_2-block_99-block_1-block_62-block_93-block_18-block_124-block_76-block_4-block_3-block_5-block_142-block_2-block_48-block_1-block_45-block_78-block_33-block_294-block_21-bl…
NS_L8_50_Contig6606	#10	1737	177	2.71373	3			DBLd1-CIDRb1-	block_1-block_445-block_8-block_417-block_22-block_50-block_243-block_6-block_9-block_72-block_1-block_7-block_12-block_2-block_87-block_29-block_55-block_5-block_433-block_27-block_3-block_16-block_77-
NS_L8_50_Contig6685	#10	947	60	1.68731	10			DBLz6-DBLe6-	block_3-block_14-block_5-block_291-block_92-block_2-block_99-block_1-block_115-block_93-block_18-block_124-block_76-
NS_L8_50_Contig7006	#10	1065	95	2.37557				CIDRb1-	block_21-block_33-block_28-block_56-block_31-block_10-block_24-block_1-block_8-block_107-
NS_L8_50_Contig7035	#10	570	33	1.54182				NTSB-DBLa0.16-	block_4-block_19-block_17-block_20-
NS_L8_50_Contig7087_manual_selection	#10	535	69	3.4347					block_41-block_21-block_33-block_56-block_31-block_606-
NS_L8_50_Contig7096	#10	666	47	1.87939	1	1		DBLd1-CIDRb1-	block_22-block_50-block_6-block_9-block_72-block_1-block_7-
NS_L8_50_Contig7100	#10	669	48	1.91077				DBLd1-	block_11-block_106-block_4-block_35-block_15-block_26-block_49-
NS_L8_50_Contig7105	#10	598	22	0.979749				DBLd1-	block_4-block_435-block_35-block_15-block_30-block_26-block_49-
NS_L8_50_Contig7115	#10	1559	194	3.31397	1			CIDRa2.3-DBLd1-DBLd1-	block_3-block_3-block_16-block_77-block_11-block_81-block_4-block_34-block_35-block_15-block_33-block_114-block_10-block_125-block_32-block_1-block_472-block_8-block_223-
NS_L8_50_Contig7125	#10	912	70	2.04407				CIDRa3.3-DBLd1-	block_1-block_32-block_10-block_26-block_15-block_35-block_34-
NS_L8_50_Contig7133	#10	2241	266	3.16106				CIDRa2.9-DBLd1-	block_8-block_1-block_32-block_10-block_26-block_30-block_15-block_35-block_4-block_81-block_11-block_262-block_575-block_16-block_3-block_510-block_27-block_561-block_5-block_55-block_29-block_87-block_2-block_12-block_7-block_1-block_72-block_9-
NS_L8_50_Contig7143	#10	866	146	4.48981				CIDRb1-	block_8-block_1-block_24-block_10-block_31-block_56-block_28-block_21-
NS_L8_50_Contig7145	#10	951	94	2.63233	1	1		DBLa0.5-CIDRa2.3-	block_163-block_2-block_12-block_7-block_1-block_239-block_9-block_118-block_6-block_251-block_23-block_57-block_223-block_8-
NS_L8_50_Contig7146	#10	1508	266	4.69758	5	1		DBLa0.19-CIDRa2.9-CIDRa3.1-DBLd1-	block_35-block_15-block_30-block_26-block_10-block_372-block_32-block_1-block_8-block_263-block_57-block_23-block_143-block_6-block_118-block_9-block_34-
NS_L8_50_Contig7153	#10	1145	150	3.48883	12	12		DBLd1-CIDRb6-	block_10-block_24-block_1-block_8-block_172-block_22-block_50-block_173-block_6-block_298-block_9-block_1-block_7-
NS_L8_50_Contig7154	#10	1160	88	2.02031				DBLd1-CIDRb1-	block_22-block_50-block_180-block_6-block_244-block_9-block_1-block_7-block_12-block_2-block_87-block_29-block_55-block_5-block_27-block_3-
NS_L8_50_Contig7157	#10	1393	118	2.25592	12			DBLa0.8-DBLa0.22-CIDRa5-	block_19-block_4-block_13-block_381-block_3-block_171-block_14-block_64-block_5-block_36-block_2-block_12-block_7-block_1-block_34-block_9-block_75-block_6-block_23-
NS_L8_50_Contig7171	#10	1921	235	3.25787	4	2		DBLz6-DBLe9-	block_5-block_559-block_92-block_2-block_99-block_1-block_115-block_93-block_18-block_76-block_4-block_11-block_3-block_108-block_5-block_2-block_48-block_1-block_45-block_78-block_95-block_21-
NS_L8_50_Contig7190	#10	895	95	2.82679	1	1		DBLd1-CIDRb1-	block_1-block_497-block_9-block_244-block_6-block_226-block_50-block_22-block_417-block_8-block_1-block_24-
NS_L8_50_Contig7401	#10	1607	209	3.46357				DBLd4-CIDRg11-CIDRa5-	block_12-block_7-block_1-block_122-block_9-block_178-block_6-block_103-block_85-block_22-block_83-block_8-block_1-block_554-block_24-block_10-block_31-block_56-block_137-block_21-
NS_L8_50_Contig7426	#10	1539	176	3.04556	1	1		CIDRa3.5-DBLb8-	block_1-block_512-block_32-block_10-block_52-block_65-block_53-block_4-block_13-block_3-block_467-block_14-block_5-block_499-block_2-block_59-block_604-block_1-block_119-
NS_L8_50_Contig7444	#10	612	28	1.21843				DBLa0.16-CIDRa3.1-	block_239-block_1-block_9-block_350-block_6-block_68-block_23-block_104-
NS_L8_50_Contig7527	#10	3830	483	3.35847	4			CIDRa2.6-DBLd1-CIDRb1-	block_57-block_116-block_8-block_1-block_32-block_10-block_26-block_15-block_35-block_4-block_81-block_11-block_289-block_16-block_3-block_27-block_5-block_55-block_29-block_619-block_2-block_12-block_7-block_1-block_72-block_9-block_6-block_180-block_50-block_22-block_107-block_8-block_1-block_516-block_24-block_10-block_31-block_77-block_21-
NS_L8_50_Contig7529	#10	1056	153	3.85852	146	136		DBLa0.4-CIDRa4-	block_1-block_8-block_63-block_23-block_6-block_75-block_9-block_184-block_1-block_7-block_12-block_2-
NS_L8_50_Contig7530	#10	503	53	2.80609				DBLd1-	block_29-block_105-block_2-block_12-block_7-block_1-block_9-
NS_L8_50_Contig7562	#10	568	71	3.32892	21	21		DBLz3-	block_2-block_92-block_92-block_476-block_5-block_14-block_574-block_3-block_13-
NS_L8_50_Contig7563	#10	573	49	2.27738				DBLd1-	block_12-block_2-block_87-block_29-block_55-block_5-block_452-
NS_L8_50_Contig7569	#10	594	59	2.6452				CIDRb6-	block_137-block_56-block_271-block_10-block_24-block_1-
NS_L8_50_Contig7580	#10	630	81	3.42403				DBLd1-	block_105-block_2-block_12-block_7-block_1-block_72-block_9-block_443-block_6-block_173-
NS_L8_50_Contig7585	#10	837	111	3.53176	2	1		CIDRb1-	block_8-block_1-block_24-block_10-block_195-block_31-block_56-block_21-
NS_L8_50_Contig7595	#10	824	98	3.16732				CIDRb1-	block_41-block_21-block_33-block_31-block_10-block_24-block_1-
NS_L8_50_Contig7607	#10	930	99	2.83495	2	2		DBLe6-	block_11-block_3-block_108-block_5-block_213-block_2-block_48-block_1-block_45-block_78-block_529-block_95-block_21-
NS_L8_50_Contig7608	#10	4378	970	5.90051	1			NTSB-DBLa0.3-DBLa0.1-CIDRa3.2-DBLd1-CIDRb1-	block_22-block_50-block_243-block_6-block_9-block_72-block_1-block_7-block_12-block_2-block_498-block_29-block_55-block_5-block_561-block_27-block_177-block_437-block_3-block_16-block_77-block_11-block_165-block_4-block_34-block_35-block_15-block_30-block_28-block_26-block_49-block_10-block_240-block_32-block_1-block_8-block_67-block_114-block_63-block_208-block_23-block_68-block_6-block_75-block…
NS_L8_50_Contig7611	#10	1089	214	5.23335	3			CIDRb1-	block_22-block_276-block_8-block_1-block_24-block_10-block_195-block_31-block_56-block_33-block_21-
NS_L8_50_Contig7616	#10	999	360	9.59689	4	2		CIDRb3-DBLg11-	block_22-block_555-block_8-block_1-block_24-block_10-block_31-block_593-block_33-block_21-
NS_L8_50_Contig7631	#10	5204	822	4.20657	86	10		DBLa0.6-CIDRa3.1-CIDRa3.1-DBLd1-CIDRg9-	block_21-block_56-block_31-block_10-block_24-block_1-block_8-block_22-block_148-block_6-block_178-block_9-block_370-block_1-block_7-block_12-block_2-block_170-block_29-block_5-block_27-block_228-block_3-block_16-block_77-block_11-block_106-block_81-block_4-block_132-block_35-block_15-block_26-block_10-block_32-block_1-block_8-block_333-block_67-block_110-block_63-block_208-block_23-block_68-block…
NS_L8_50_Contig7636	#10	1520	242	4.23999	25	21		DBLz3-DBLe3-	block_21-block_78-block_45-block_1-block_48-block_2-block_142-block_5-block_126-block_3-block_160-block_4-block_76-block_124-block_18-block_93-block_62-block_1-block_99-
NS_L8_50_Contig7642	#10	1607	552	9.1478			PF3D7_0221900 PfGB4_020024550 PfIT_020026350 PF3D7_0323900	DBLb1-	block_544-block_3-
NS_L8_50_Contig7661	#10	6042	8203	36.1564	18			DBLa0.4-CIDRa6-DBLb5-DBLd1-CIDRb1-	block_41-block_21-block_56-block_31-block_10-block_24-block_1-block_8-block_159-block_22-block_50-block_180-block_6-block_361-block_9-block_72-block_1-block_7-block_12-block_2-block_87-block_29-block_55-block_5-block_27-block_3-block_16-block_158-block_11-block_4-block_74-block_15-block_18-block_61-block_209-block_62-block_1-block_59-block_2-block_5-block_199-block_14-block_3-block_13-block_278-b…
NS_L8_50_Contig788	#10	1916	222	3.08568				DBLb13-DBLd1-	block_1-block_7-block_2-block_87-block_29-block_55-block_5-block_185-block_3-block_16-block_11-block_165-block_4-block_35-block_15-block_30-block_26-block_49-block_18-block_61-block_62-block_1-
NS_L8_50_Contig996	#10	522	25	1.27545				DBLa0.5-	block_1-block_7-block_12-block_2-block_88-block_36-block_5-block_64-
NS_L8_50_53653	#10	537	22	1.09104					block_10-block_33-block_31-block_56-block_21-
NS_L8_50_69719	#10	1030	36	0.930805				DBLg10-	block_21-block_355-block_18-block_45-block_1-block_579-block_48-block_2-block_29-block_5-block_86-
NS_L8_50_75243	#10	599	14	0.622436	5	5		DBLa0.8-CIDRa3.5-	block_184-block_9-block_75-block_6-block_68-block_23-block_63-
NS_L8_50_76217	#10	780	21	0.716998				CIDRa5-DBLb5-	block_32-block_10-block_52-block_65-block_53-block_4-
NS_L8_50_77271	#10	1229	86	1.86355	11			DBLd4-CIDRg9-	block_12-block_7-block_1-block_122-block_9-block_178-block_6-block_148-block_22-block_8-block_1-block_24-
NS_L8_55_26049	#11	679	48	1.56013	1	1		DBLa0.16-CIDRa6-	block_1-block_239-block_9-block_350-block_6-block_68-block_23-block_57-block_8-
NS_L8_55_26489	#11	1085	152	3.09173				NTSB-DBLa0.16-	block_323-block_20-block_17-block_19-block_4-block_13-block_215-block_3-block_54-block_14-block_64-block_5-block_36-block_2-
NS_L8_55_26673	#11	1663	151	2.00388				NTSB-DBLa0.16-	block_20-block_17-block_19-block_4-block_13-block_381-block_3-block_79-block_14-block_64-block_5-block_36-block_163-block_2-block_12-block_7-block_1-block_34-block_9-block_75-block_6-
NS_L8_55_26793	#11	3096	1861	13.2658	454	67	PfGA01_050037000 PfSN01_050037600	DBLg8-DBLz1-DBLe5-	block_45-block_18-block_546-block_52-block_550-block_53-block_4-block_3-block_14-block_5-block_549-block_92-block_2-block_99-block_1-block_115-block_93-block_18-block_124-block_76-block_4-block_475-block_11-block_3-block_126-block_5-block_2-block_200-block_466-block_97-block_274-block_474-block_21-block_41-block_196-block_43-
NS_L8_55_26819	#11	5284	3069	12.8181	1			NTSB-DBLa0.11-CIDRa2.4-DBLg2-DBLd1-	block_1-block_7-block_12-block_2-block_87-block_29-block_5-block_82-block_3-block_16-block_77-block_11-block_73-block_106-block_81-block_4-block_35-block_15-block_30-block_18-block_61-block_62-block_1-block_59-block_2-block_29-block_5-block_86-block_3-block_16-block_11-block_4-block_139-block_15-block_26-block_10-block_32-block_1-block_8-block_57-block_23-block_181-block_6-block_118-block_9-block…
NS_L8_55_33122	#11	641	33	1.13617				CIDRb1-	block_22-block_107-block_8-block_1-
NS_L8_55_47134	#11	840	19	0.499186					block_73-
NS_L8_55_Contig1108	#11	598	34	1.25477				CIDRa3.1-	block_63-block_110-block_67-block_8-block_1-block_32-
NS_L8_55_Contig1592	#11	1104	61	1.21941	14	12		CIDRb1-	block_226-block_50-block_22-block_8-block_1-block_24-block_10-block_31-block_254-block_28-block_21-
NS_L8_55_Contig1749	#11	617	27	0.965754				CIDRa3.4-DBLd1-	block_10-block_49-block_26-block_30-block_15-block_35-block_4-
NS_L8_55_Contig1785	#11	1174	139	2.61297				NTSB-DBLa0.1-	block_20-block_17-block_19-block_4-block_13-block_3-block_54-block_14-block_5-block_36-block_153-block_2-block_130-block_7-
NS_L8_55_Contig1809	#11	505	23	1.00514				CIDRa3.3-CIDRa3.4-	block_30-block_49-block_10-block_32-
NS_L8_55_Contig1924	#11	506	21	0.915918
NS_L8_55_Contig2009	#11	543	23	0.934794	6	6		DBLd1-CIDRb1-	block_7-block_1-block_72-block_9-block_6-block_138-
NS_L8_55_Contig2053	#11	1289	80	1.3697	8			DBLd1-CIDRb1-	block_9-block_6-block_500-block_50-block_22-block_8-block_1-block_24-block_10-block_31-block_56-block_33-
NS_L8_55_Contig2096	#11	593	20	0.744326	7	7		CIDRa2.9-	block_8-block_1-block_32-
NS_L8_55_Contig2211	#11	698	67	2.1184				DBLpam2-	block_328-block_2-block_343-block_18-
NS_L8_55_Contig2228	#11	7306	15123	45.6821	565	2	PfSN01_050037600 PfSD01_050037500	NTSA-DBLa1.1-CIDRa1.2-DBLb11-DBLg1-DBLe1-DBLg8-	block_264-block_20-block_17-block_19-block_4-block_13-block_513-block_3-block_219-block_14-block_179-block_5-block_60-block_2-block_12-block_7-block_1-block_70-block_9-block_536-block_6-block_150-block_23-block_57-block_8-block_1-block_121-block_10-block_141-block_65-block_53-block_4-block_189-block_13-block_234-block_3-block_457-block_14-block_5-block_605-block_183-block_2-block_48-block_604-blo…
NS_L8_55_Contig2370	#11	1093	130	2.62489	1	1		CIDRpam-DBLpam3-	block_344-block_553-block_342-block_1-block_329-block_4-block_307-
NS_L8_55_Contig2371	#11	1092	72	1.45512	2	2		DBLz4-	block_14-block_5-block_284-block_92-block_2-block_99-block_1-block_283-block_93-block_18-block_280-block_21-
NS_L8_55_Contig2458	#11	6493	1137	3.86459	6			DBLa0.18-CIDRa4-DBLb5-DBLg13-DBLd1-CIDRb1-	block_1-block_9-block_6-block_23-block_63-block_8-block_1-block_32-block_10-block_101-block_52-block_65-block_53-block_4-block_13-block_3-block_174-block_14-block_5-block_605-block_183-block_2-block_59-block_1-block_62-block_61-block_18-block_557-block_15-block_74-block_4-block_11-block_16-block_3-block_98-block_5-block_90-block_167-block_2-block_1-block_45-block_18-block_15-block_74-block_4-bloc…
NS_L8_55_Contig2489	#11	2814	323	2.53318	14	9		DBLe2-DBLz3-DBLe3-	block_3-block_265-block_5-block_2-block_48-block_45-block_363-block_315-block_4-block_13-block_3-block_574-block_14-block_5-block_476-block_92-block_2-block_99-block_1-block_62-block_93-block_124-block_76-block_4-block_160-block_3-block_126-block_5-block_222-block_2-block_48-
NS_L8_55_Contig2494	#11	6533	9049	30.5686	575	2	PfSN01_050037600 PfSD01_050037500	DBLa1.1-CIDRa1.2-DBLb11-DBLg1-DBLe1-DBLg8-	block_3-block_219-block_14-block_179-block_5-block_60-block_2-block_12-block_7-block_1-block_70-block_9-block_536-block_6-block_150-block_23-block_57-block_8-block_1-block_121-block_10-block_141-block_65-block_53-block_4-block_189-block_13-block_234-block_3-block_457-block_14-block_5-block_605-block_183-block_2-block_48-block_604-block_1-block_62-block_61-block_18-block_15-block_139-block_4-block…
NS_L8_55_Contig2839	#11	564	34	1.33042				DBLb10-	block_29-block_2-block_59-block_1-block_119-block_62-block_61-
NS_L8_55_Contig3099	#11	530	41	1.70725				DBLa0.1-	block_75-block_9-block_34-block_492-block_1-block_7-block_12-
NS_L8_55_Contig3449	#11	1857	74	0.879443	8			CIDRb1-DBLg3-DBLg3-DBLz4-	block_10-block_31-block_56-block_15-block_74-block_4-block_11-block_16-block_3-block_86-block_5-block_94-block_2-block_48-block_1-block_45-block_18-block_52-block_123-block_338-block_53-block_4-
NS_L8_55_Contig3451	#11	553	36	1.4367	8	8		DBLd1-	block_29-block_105-block_2-block_12-block_7-block_1-block_72-block_9-
NS_L8_55_Contig3470	#11	589	27	1.01166				DBLd1-	block_55-block_5-block_27-block_185-block_3-block_16-
NS_L8_55_Contig3473	#11	595	25	0.92728	4	4		DBLa0.18-	block_36-block_5-block_210-block_14-block_171-block_3-block_13-block_4-block_19-
NS_L8_55_Contig3509	#11	714	35	1.08183				DBLd1-	block_4-block_66-block_469-block_73-block_11-block_16-block_3-block_252-block_452-block_5-
NS_L8_55_Contig3513	#11	1613	251	3.43421	2	2		NTSB-DBLa0.1-	block_20-block_17-block_19-block_4-block_13-block_135-block_3-block_54-block_14-block_5-block_36-block_153-block_2-block_12-block_7-block_1-block_34-block_9-block_75-
NS_L8_55_Contig3548	#11	5369	1300	5.34365	9			NTSB-DBLa0.15-CIDRa2.5-CIDRa3.1-DBLd1-CIDRb1-	block_20-block_17-block_19-block_4-block_13-block_215-block_3-block_171-block_14-block_210-block_5-block_36-block_163-block_2-block_12-block_7-block_1-block_9-block_118-block_6-block_143-block_23-block_154-block_57-block_263-block_8-block_1-block_32-block_10-block_26-block_30-block_15-block_35-block_4-block_81-block_11-block_16-block_3-block_253-block_27-block_5-block_55-block_29-block_87-block_2…
NS_L8_55_Contig3549	#11	4240	16818	87.538	8			NTSB-DBLa0.9-CIDRa2.1-DBLd1-	block_216-block_20-block_17-block_19-block_4-block_13-block_188-block_3-block_54-block_14-block_64-block_5-block_36-block_2-block_12-block_7-block_1-block_70-block_9-block_118-block_6-block_23-block_57-block_116-block_8-block_1-block_32-block_10-block_49-block_506-block_15-block_35-block_4-block_11-block_16-block_3-block_510-block_27-block_5-block_55-block_29-block_87-block_2-block_12-block_7-blo…
NS_L8_55_Contig3562	#11	1576	1178	16.4959			PF3D7_0221900 PfGB4_020024550 PfIT_020026350 PfIT_030028700	DBLb1-	block_3-block_544-
NS_L8_55_Contig3628	#11	2155	250	2.56024				CIDRa2.2-DBLd1-	block_8-block_1-block_32-block_10-block_26-block_15-block_35-block_4-block_106-block_11-block_109-block_16-block_3-block_27-block_5-block_55-block_29-block_198-block_2-block_12-block_7-block_1-
NS_L8_55_Contig3776	#11	1180	8089	151.287	4			DBLd1-CIDRb5-	block_29-block_105-block_2-block_12-block_7-block_1-block_72-block_9-block_6-block_50-block_22-block_172-block_8-
NS_L8_55_Contig4119	#11	534	17	0.70258				DBLb8-	block_62-block_1-block_59-block_2-block_5-block_436-block_14-
NS_L8_55_Contig4171	#11	989	45	1.00416				CIDRa3.1-CIDRa3.1-DBLd1-	block_1-block_32-block_10-block_26-block_30-block_15-block_35-block_4-
NS_L8_55_Contig4308	#11	3037	1642	11.9321	453	67	PfGA01_050037000 PfSN01_050037600	DBLg8-DBLz1-DBLe5-	block_43-block_196-block_41-block_21-block_474-block_274-block_97-block_466-block_200-block_2-block_5-block_126-block_3-block_11-block_475-block_4-block_76-block_124-block_18-block_93-block_115-block_1-block_99-block_2-block_92-block_549-block_5-block_14-block_3-block_4-block_53-block_550-block_52-block_546-block_18-block_45-
NS_L8_55_Contig5091	#11	904	27	0.659149				DBLd1-	block_12-block_2-block_87-block_29-block_55-block_5-block_27-block_3-block_16-block_237-block_11-
NS_L8_55_Contig5111	#11	595	76	2.81893				NTSB-DBLa0.16-	block_323-block_20-block_17-block_19-block_4-block_13-block_215-
NS_L8_55_Contig5132	#11	659	40	1.33956	1	1		DBLa0.16-CIDRa6-	block_1-block_239-block_9-block_350-block_6-block_68-block_23-block_57-
NS_L8_55_Contig5139	#11	686	31	0.997299				NTSB-DBLa0.16-	block_217-block_20-block_17-block_19-block_4-block_13-block_381-block_3-block_79-
NS_L8_55_Contig5181	#11	1471	11985	179.81				DBLd1-CIDRb5-	block_1-block_72-block_9-block_244-block_6-block_50-block_22-block_172-block_8-block_1-block_24-block_10-block_31-block_56-block_21-
NS_L8_55_Contig5182	#11	4182	14518	76.6145	25			NTSB-DBLa0.11-CIDRa2.2-DBLd1-	block_71-block_28-block_20-block_17-block_19-block_4-block_13-block_220-block_3-block_54-block_14-block_64-block_5-block_36-block_88-block_2-block_12-block_7-block_1-block_70-block_9-block_118-block_6-block_23-block_57-block_526-block_8-block_1-block_32-block_10-block_28-block_26-block_15-block_35-block_4-block_11-block_273-block_16-block_3-block_27-block_5-block_55-block_29-block_2-block_12-bloc…
NS_L8_55_Contig5185	#11	3177	9138	63.4778				DBLa0.9-DBLa0.16-CIDRa3.2-DBLd1-	block_5-block_27-block_3-block_16-block_158-block_11-block_165-block_4-block_35-block_15-block_30-block_389-block_49-block_10-block_32-block_1-block_441-block_8-block_354-block_67-block_110-block_63-block_23-block_68-block_6-block_348-block_9-block_70-block_1-block_7-block_12-block_2-block_36-block_5-block_64-block_14-block_54-block_3-block_215-
NS_L8_55_Contig5188	#11	1981	4747	52.8838	2			NTSB-DBLa0.23-CIDRa3.2-	block_354-block_67-block_63-block_208-block_23-block_68-block_6-block_75-block_9-block_34-block_492-block_1-block_7-block_12-block_2-block_36-block_5-block_64-block_14-block_386-block_3-block_102-block_13-block_4-block_19-block_17-block_20-
NS_L8_55_Contig5191	#11	5356	3262	13.441	1			NTSB-DBLa0.11-CIDRa2.4-DBLg2-DBLd1-	block_71-block_20-block_17-block_19-block_4-block_13-block_3-block_171-block_14-block_210-block_5-block_36-block_2-block_12-block_7-block_1-block_70-block_9-block_118-block_6-block_181-block_23-block_57-block_8-block_1-block_32-block_10-block_26-block_15-block_139-block_4-block_11-block_16-block_3-block_86-block_5-block_29-block_2-block_59-block_1-block_62-block_61-block_18-block_30-block_15-bloc…
NS_L8_55_Contig5221	#11	3974	1212	6.73074	8			DBLa0.17-CIDRa3.1-CIDRa3.1-DBLd1-CIDRb1-	block_75-block_6-block_68-block_23-block_63-block_110-block_67-block_482-block_8-block_226-block_1-block_32-block_10-block_26-block_30-block_15-block_35-block_4-block_490-block_165-block_11-block_289-block_16-block_3-block_27-block_5-block_301-block_29-block_87-block_2-block_12-block_7-block_1-block_72-block_9-block_6-block_50-block_22-block_107-block_8-block_1-block_24-block_10-block_31-block_56…
NS_L8_55_Contig5446	#11	735	137	4.11359				CIDRg10-	block_24-block_10-block_195-block_31-block_127-block_33-block_376-block_21-
NS_L8_55_Contig5548	#11	1677	252	3.31631				DBLa0.16-CIDRa3.4-	block_32-block_1-block_8-block_67-block_63-block_208-block_23-block_68-block_6-block_75-block_9-block_34-block_1-block_7-block_12-block_2-block_163-block_36-block_5-block_64-block_14-
NS_L8_55_Contig5752	#11	587	386	14.5123	1	1		DBLd1-CIDRb6-	block_22-block_50-block_173-block_6-block_9-block_1-
NS_L8_55_Contig5768	#11	5075	9872	42.9296	8			NTSB-DBLa0.4-CIDRa6-DBLd1-CIDRb1-	block_127-block_31-block_10-block_24-block_1-block_8-block_417-block_22-block_50-block_226-block_6-block_443-block_9-block_72-block_1-block_7-block_12-block_2-block_198-block_29-block_55-block_5-block_27-block_3-block_11-block_4-block_35-block_15-block_30-block_26-block_10-block_32-block_1-block_8-block_57-block_23-block_6-block_348-block_9-block_184-block_1-block_7-block_12-block_2-block_60-bloc…
NS_L8_55_Contig5783	#11	816	135	3.65117	3	2		DBLd1-CIDRb1-	block_1-block_8-block_247-block_22-block_50-block_173-block_6-block_9-block_1-
NS_L8_55_Contig5800_manual_selection	#11	715	5788	178.653					block_39-block_40-block_38-block_44-block_113-block_203-block_46-block_152-block_111-block_69-block_80-
NS_L8_55_Contig5801	#11	614	4262	153.191				CIDRb6-	block_21-block_33-block_56-block_31-block_271-block_10-block_24-
NS_L8_55_Contig5813	#11	655	1113	37.5009	3	3		DBLd1-CIDRb6-	block_1-block_9-block_6-block_226-block_50-block_22-block_172-block_8-
NS_L8_55_Contig5830	#11	825	2622	70.1401	2	1		CIDRb6-	block_21-block_28-block_127-block_31-block_10-block_24-block_1-block_8-
NS_L8_55_Contig5835	#11	1326	316	5.25934				DBLd4-CIDRg6-	block_21-block_205-block_169-block_31-block_10-block_24-block_1-block_8-block_83-block_22-block_85-block_6-block_178-block_9-block_370-
NS_L8_55_Contig5840	#11	892	411	10.1687				CIDRb1-	block_41-block_21-block_137-block_56-block_31-block_10-block_24-block_1-block_8-
NS_L8_55_Contig5843	#11	945	906	21.1585				CIDRb5-	block_8-block_1-block_24-block_10-block_31-block_127-block_95-block_21-
NS_L8_55_Contig5844	#11	1006	173	3.79521				DBLa0.5-	block_1-block_7-block_12-block_2-block_36-block_5-block_64-block_14-block_79-block_3-block_215-block_13-block_4-block_19-
NS_L8_55_Contig5845	#11	1026	1022	21.9832	4	2		CIDRb1-	block_243-block_50-block_22-block_287-block_8-block_1-block_24-block_10-block_231-block_31-block_127-
NS_L8_55_Contig5846	#11	1108	599	11.9309	19	4		CIDRb6-	block_22-block_172-block_8-block_1-block_24-block_10-block_31-block_56-block_28-block_21-block_531-
NS_L8_55_Contig5848	#11	1194	9919	183.338	10			CIDRb1-CIDRa2.7-	block_41-block_21-block_33-block_205-block_31-block_10-block_24-block_1-block_8-block_287-block_22-block_50-block_243-
NS_L8_55_Contig5853	#11	2438	279	2.52556				DBLa0.20-CIDRa3.2-CIDRa3.1-DBLd1-	block_2-block_29-block_5-block_27-block_253-block_3-block_16-block_77-block_11-block_165-block_4-block_35-block_30-block_26-block_10-block_32-block_1-block_8-block_67-block_63-block_71-block_208-block_23-block_68-block_6-block_75-
NS_L8_55_Contig5854	#11	2194	1884	18.951	7	2		NTSB-DBLa0.9-CIDRa2.7-	block_20-block_17-block_19-block_4-block_13-block_3-block_171-block_14-block_64-block_5-block_36-block_2-block_12-block_7-block_1-block_34-block_9-block_413-block_6-block_181-block_23-block_57-block_116-block_8-block_1-block_32-
NS_L8_55_Contig5855	#11	6072	24147	87.7646	1			DBLd1-CIDRb1-CIDRg2-NTSB-DBLa0.22-CIDRa3.3-CIDRa3.1-DBLd1-	block_71-block_20-block_17-block_19-block_4-block_13-block_3-block_54-block_14-block_64-block_5-block_36-block_163-block_2-block_12-block_7-block_1-block_239-block_34-block_9-block_75-block_6-block_68-block_23-block_63-block_110-block_67-block_8-block_1-block_32-block_10-block_26-block_15-block_35-block_132-block_4-block_81-block_11-block_273-block_16-block_3-block_358-block_433-block_5-block_55-…
NS_L8_55_Contig5858	#11	2515	707	6.20397				CIDRa3.4-DBLd1-CIDRb1-	block_1-block_32-block_168-block_10-block_26-block_30-block_15-block_35-block_4-block_73-block_11-block_16-block_3-block_27-block_5-block_55-block_29-block_2-block_7-block_1-block_72-block_9-block_6-block_173-block_50-block_22-block_107-block_8-
NS_L8_55_Contig5859	#11	4235	845	4.40343	74			DBLg5-DBLd5-CIDRb2-DBLe4-	block_66-block_43-block_128-block_41-block_21-block_78-block_45-block_1-block_48-block_2-block_213-block_5-block_126-block_3-block_11-block_4-block_76-block_31-block_10-block_1-block_8-block_22-block_50-block_149-block_6-block_9-block_1-block_7-block_12-block_2-block_96-block_5-block_27-block_3-block_16-block_77-block_11-block_4-block_74-block_15-block_257-block_45-block_1-
NS_L8_55_Contig5860	#11	3048	6871	49.75	6			CIDRa2.7-DBLd1-CIDRb1-	block_32-block_10-block_49-block_340-block_15-block_35-block_132-block_4-block_81-block_11-block_16-block_3-block_156-block_27-block_5-block_29-block_170-block_2-block_12-block_7-block_1-block_9-block_6-block_50-block_22-block_417-block_8-block_1-block_24-block_10-block_31-block_56-block_405-block_21-
NS_L8_55_Contig5861	#11	3472	1154	7.33524	11			CIDRa2.4-DBLb5-DBLd1-CIDRb6-	block_22-block_50-block_243-block_6-block_9-block_497-block_1-block_7-block_12-block_2-block_619-block_249-block_5-block_228-block_3-block_16-block_77-block_11-block_4-block_132-block_35-block_15-block_30-block_26-block_49-block_18-block_61-block_209-block_62-block_119-block_1-block_604-block_59-block_2-block_5-block_14-block_3-block_13-block_4-block_53-block_65-block_52-block_101-block_10-
NS_L8_55_Contig5862	#11	3537	1763	11.0003	2			DBLa0.5-CIDRa2.2-DBLd1-	block_7-block_12-block_2-block_29-block_55-block_5-block_398-block_27-block_228-block_3-block_16-block_77-block_11-block_517-block_4-block_132-block_35-block_15-block_26-block_10-block_32-block_1-block_8-block_626-block_57-block_23-block_6-block_75-block_9-block_34-block_239-block_1-block_7-block_12-block_2-block_153-block_36-block_5-block_64-block_14-block_79-block_3-block_13-block_4-block_19-
NS_L8_55_Contig5863	#11	4055	1964	10.689	931		PfSN01_120006400 PfGB4_000008200 PfGA01_120060200 PfGA01_100005800 PfGA01_000009600 PfKH01_000031900	DBLepam4-DBLb13-DBLepam5-DBLe10-CIDRa5-DBLz4-	block_327-block_326-block_2-block_304-block_1-block_310-block_76-block_4-block_404-block_11-block_586-block_3-block_108-block_5-block_142-block_2-block_371-block_1-block_97-block_206-block_76-block_4-block_160-block_3-block_126-block_5-block_222-block_2-block_48-block_1-block_45-block_78-block_21-block_41-block_473-block_43-block_25-block_42-block_39-block_40-block_38-block_44-
NS_L8_55_Contig5864	#11	4352	3295	16.7092	12			CIDRa3.4-DBLb10-DBLd1-CIDRb1-	block_32-block_10-block_101-block_52-block_17-block_375-block_4-block_278-block_13-block_3-block_14-block_199-block_5-block_2-block_59-block_1-block_523-block_62-block_209-block_61-block_18-block_15-block_35-block_4-block_11-block_16-block_3-block_253-block_27-block_5-block_55-block_29-block_2-block_12-block_7-block_1-block_72-block_9-block_244-block_6-block_50-block_22-block_107-block_8-block_1-…
NS_L8_55_Contig5865	#11	4601	2424	11.627	5			DBLa0.11-CIDRa2.9-DBLb8-DBLd1-	block_6-block_9-block_497-block_1-block_7-block_12-block_2-block_105-block_29-block_55-block_5-block_27-block_510-block_3-block_16-block_158-block_11-block_4-block_132-block_35-block_15-block_26-block_18-block_61-block_209-block_62-block_1-block_59-block_2-block_400-block_5-block_14-block_146-block_3-block_13-block_4-block_53-block_17-block_52-block_10-block_125-block_32-block_1-block_8-block_116…
NS_L8_55_Contig5866	#11	5310	6859	28.5072	16			NTSB-DBLa0.12-CIDRa2.4-CIDRa3.1-DBLd1-CIDRg4-	block_20-block_17-block_19-block_4-block_13-block_3-block_54-block_14-block_64-block_5-block_36-block_153-block_2-block_12-block_7-block_1-block_70-block_9-block_413-block_6-block_57-block_116-block_8-block_1-block_32-block_10-block_26-block_15-block_35-block_4-block_11-block_16-block_3-block_27-block_5-block_55-block_29-block_105-block_2-block_12-block_7-block_1-block_122-block_9-block_178-block…
NS_L8_55_Contig5867	#11	8403	20472	53.7668	22			NTSB-DBLa0.16-CIDRa6-DBLg5-DBLd5-CIDRb4-DBLz6-DBLe6-	block_20-block_19-block_4-block_13-block_215-block_3-block_54-block_14-block_161-block_5-block_36-block_88-block_2-block_130-block_7-block_1-block_34-block_9-block_350-block_6-block_23-block_57-block_8-block_1-block_32-block_10-block_241-block_15-block_4-block_11-block_16-block_3-block_86-block_5-block_133-block_411-block_2-block_48-block_1-block_45-block_18-block_15-block_4-block_11-block_77-blo…
NS_L8_55_Contig820	#11	1382	209	3.33754	7	1		DBLpam3-DBLepam4-	block_484-block_3-block_314-block_5-block_313-block_2-block_306-block_428-block_1-block_305-block_4-block_401-block_11-block_431-block_3-block_311-block_327-
NS_L8_55_71548	#11	598	50	1.84526				DBLd1-	block_49-block_26-block_30-block_15-block_35-block_4-block_11-
NS_L8_55_72476	#11	999	473	10.4492	1	1		DBLg4-DBLd3-	block_11-block_4-block_35-block_15-block_18-block_45-block_1-block_48-block_2-block_411-block_133-block_5-
NS_L8_55_72740	#11	1409	1140	17.8559	3	3		DBLd1-CIDRg12-	block_105-block_2-block_12-block_7-block_1-block_122-block_9-block_178-block_6-block_103-block_85-block_22-block_83-block_8-block_1-block_567-block_24-block_10-
NS_L1_84_100612	#12	1116	86	2.09091	1			DBLg6-DBLd4-	block_86-block_5-block_133-block_2-block_136-block_1-block_45-block_78-block_15-block_35-block_4-block_11-
NS_L1_84_100768	#12	1197	58	1.31472	4	4		DBLz6-DBLe6-	block_78-block_45-block_1-block_48-block_2-block_213-block_5-block_108-block_3-block_11-block_4-block_76-block_124-block_18-block_93-block_115-
NS_L1_84_101292	#12	1549	102	1.78669	126			DBLz5-DBLe11-	block_92-block_2-block_1-block_93-block_18-block_261-block_4-block_3-block_5-block_2-block_48-block_1-block_45-
NS_L1_84_28794	#12	606	26	1.16413	2	2		DBLa0.12-	block_5-block_36-block_2-block_12-block_7-block_1-block_70-block_9-
NS_L1_84_29328	#12	699	12	0.465805	1	1		CIDRb1-	block_22-block_107-block_8-block_1-block_24-block_10-block_459-
NS_L1_84_29434	#12	726	28	1.04646				CIDRa2.2-DBLd1-	block_32-block_10-block_26-block_30-block_15-block_35-
NS_L1_84_29604	#12	764	96	3.4094	1			DBLz4-	block_280-block_582-block_18-block_93-block_283-block_1-block_99-block_2-block_92-
NS_L1_84_30326	#12	978	51	1.41492	4	2		DBLd1-CIDRb6-	block_2-block_12-block_7-block_1-block_9-block_6-block_138-block_50-block_22-block_172-block_8-block_1-
NS_L1_84_30456	#12	1030	102	2.68697	7	7		NTSB-DBLa0.15-	block_20-block_17-block_19-block_4-block_13-block_215-block_3-block_54-block_14-block_64-block_5-block_36-block_163-block_2-
NS_L1_84_30494	#12	1050	54	1.39542				DBLg3-DBLz4-	block_2-block_48-block_1-block_279-block_45-block_18-block_52-block_123-block_338-block_53-block_4-block_13-block_393-block_3-
NS_L1_84_30500	#12	1054	194	4.99415	2			DBLd1-CIDRg2-	block_27-block_5-block_55-block_29-block_424-block_2-block_12-block_7-block_1-block_122-block_9-block_178-block_6-block_477-block_85-
NS_L1_84_30624	#12	1123	291	7.03094				NTSB-DBLa0.11-	block_2-block_88-block_36-block_5-block_64-block_14-block_54-block_3-block_188-block_13-block_4-block_19-block_17-block_20-
NS_L1_84_30778	#12	1230	374	8.25024	4			DBLd7-CIDRb1-	block_21-block_56-block_31-block_271-block_10-block_24-block_1-block_8-block_287-block_22-block_50-block_226-block_6-block_443-
NS_L1_84_31020	#12	1429	163	3.09496				DBLd1-CIDRb1-	block_1-block_72-block_9-block_6-block_243-block_50-block_22-block_287-block_8-block_1-block_24-block_10-block_31-block_127-block_254-block_21-
NS_L1_84_31170	#12	1649	340	5.59446				DBLd4-CIDRg10-	block_21-block_294-block_137-block_56-block_31-block_271-block_10-block_24-block_1-block_8-block_83-block_22-block_85-block_103-block_6-block_178-block_9-block_122-block_1-block_7-block_12-
NS_L1_84_31466	#12	2486	253	2.76134	18			DBLa0.5-CIDRa2.6-DBLd1-	block_163-block_2-block_12-block_7-block_1-block_34-block_9-block_75-block_6-block_251-block_23-block_514-block_57-block_116-block_8-block_1-block_334-block_32-block_372-block_10-block_26-block_30-block_15-block_35-block_132-block_4-block_11-block_77-block_16-block_3-block_82-
NS_L1_84_31532	#12	3016	945	8.5016	5			CIDRa3.3-CIDRa3.4-DBLd1-CIDRg4-	block_10-block_26-block_30-block_15-block_35-block_4-block_81-block_11-block_16-block_3-block_510-block_419-block_27-block_5-block_29-block_2-block_12-block_7-block_1-block_9-block_458-block_6-block_85-block_22-block_83-block_8-block_1-block_24-block_10-block_31-block_56-block_33-block_21-
NS_L1_84_31550	#12	3464	441	3.45431	1			DBLa0.11-CIDRa2.4-DBLd1-	block_6-block_496-block_9-block_72-block_1-block_7-block_12-block_2-block_87-block_29-block_55-block_5-block_82-block_573-block_3-block_16-block_77-block_11-block_73-block_4-block_35-block_15-block_30-block_26-block_10-block_32-block_1-block_8-block_116-block_23-block_6-block_9-block_70-block_1-block_7-block_12-block_2-block_153-block_36-block_5-block_64-block_14-block_171-block_3-block_102-
NS_L1_84_31554	#12	3616	641	4.80983	22			CIDRa2.5-DBLd1-CIDRb1-	block_21-block_127-block_31-block_10-block_24-block_1-block_8-block_107-block_22-block_50-block_180-block_6-block_9-block_1-block_7-block_12-block_2-block_105-block_29-block_301-block_5-block_27-block_3-block_16-block_77-block_11-block_517-block_4-block_132-block_35-block_15-block_26-block_10-block_372-block_32-block_1-block_472-block_8-block_116-block_57-
NS_L1_84_31564	#12	4246	2967	18.96	21			DBLa0.19-CIDRa2.3-DBLd1-CIDRb1-	block_127-block_31-block_195-block_10-block_24-block_456-block_1-block_8-block_107-block_22-block_50-block_226-block_6-block_9-block_72-block_1-block_7-block_2-block_87-block_29-block_55-block_5-block_27-block_3-block_16-block_109-block_11-block_517-block_4-block_35-block_15-block_30-block_26-block_10-block_125-block_32-block_1-block_8-block_116-block_57-block_23-block_6-block_9-block_184-block_4…
NS_L1_84_31566	#12	4276	932	5.91396	10			DBLa0.11-CIDRa2.4-DBLd1-CIDRg2-	block_21-block_56-block_271-block_10-block_24-block_1-block_8-block_22-block_85-block_477-block_6-block_178-block_9-block_122-block_1-block_7-block_12-block_2-block_87-block_29-block_55-block_5-block_82-block_185-block_3-block_16-block_11-block_4-block_35-block_30-block_26-block_10-block_32-block_1-block_8-block_116-block_57-block_23-block_6-block_9-block_70-block_1-block_7-block_12-block_2-
NS_L1_84_41568	#12	591	19	0.872301				CIDRb1-	block_24-block_10-block_31-block_56-block_137-block_120-
NS_L1_84_41754	#12	614	25	1.10477	7	7		DBLg10-	block_86-block_5-block_133-block_2-block_48-block_1-block_45-
NS_L1_84_42818	#12	804	51	1.72113	4			CIDRg10-	block_83-block_8-block_1-block_24-block_10-block_543-block_31-block_56-block_28-
NS_L1_84_43112	#12	883	37	1.13695	2			DBLa0.12-	block_3-block_54-block_14-block_161-block_5-block_36-block_2-block_12-block_7-block_1-block_70-block_9-
NS_L1_84_44506	#12	1836	216	3.19213	3	3		DBLa0.11-CIDRa2.1-NTSB-DBLa0.12-	block_20-block_17-block_19-block_4-block_13-block_3-block_54-block_14-block_64-block_5-block_36-block_2-block_12-block_7-block_1-block_70-block_9-block_6-block_23-block_57-block_8-
NS_L1_84_44840	#12	4274	994	6.31033	10			DBLa0.11-CIDRa2.4-DBLd1-CIDRg2-	block_21-block_56-block_271-block_10-block_24-block_1-block_8-block_22-block_85-block_477-block_6-block_178-block_9-block_122-block_1-block_7-block_12-block_2-block_87-block_29-block_55-block_5-block_82-block_185-block_3-block_16-block_11-block_4-block_35-block_30-block_26-block_10-block_32-block_1-block_8-block_116-block_57-block_23-block_6-block_9-block_70-block_1-block_7-block_12-block_2-
NS_L1_84_44844	#12	4375	3269	20.2739	25			DBLa0.19-CIDRa2.3-DBLd1-CIDRb1-	block_12-block_7-block_1-block_492-block_184-block_9-block_6-block_23-block_57-block_116-block_8-block_1-block_32-block_125-block_10-block_26-block_15-block_35-block_4-block_517-block_11-block_109-block_16-block_3-block_27-block_5-block_55-block_29-block_87-block_2-block_7-block_1-block_72-block_9-block_6-block_226-block_50-block_22-block_107-block_8-block_1-block_456-block_24-block_10-block_195-…
NS_L1_84_64465	#12	640	21	0.890306	4	4		DBLa0.5-	block_14-block_64-block_5-block_36-block_153-block_2-block_12-block_7-block_1-block_239-
NS_L1_84_Contig10000	#12	734	109	4.02931				CIDRb6-	block_1-block_24-block_10-block_31-block_56-block_21-
NS_L1_84_Contig10003	#12	750	124	4.48601	6	3		DBLe4-	block_41-block_21-block_608-block_78-block_45-block_1-block_48-block_2-block_293-block_5-
NS_L1_84_Contig10005	#12	892	54	1.64259	1			DBLd1-	block_433-block_5-block_29-block_2-block_12-block_7-block_1-block_72-block_9-block_6-
NS_L1_84_Contig10009	#12	777	304	10.6158				DBLa0.19-CIDRa2.5-	block_8-block_116-block_57-block_71-block_23-block_181-block_6-block_118-block_9-block_34-block_1-
NS_L1_84_Contig10014	#12	830	71	2.32103				CIDRg12-	block_41-block_21-block_56-block_31-block_10-block_24-block_1-
NS_L1_84_Contig10020	#12	1746	209	3.2479	73			DBLd1-CIDRb1-	block_16-block_3-block_156-block_27-block_5-block_55-block_29-block_87-block_2-block_12-block_7-block_1-block_72-block_9-block_6-block_243-block_50-block_22-block_287-block_8-block_1-block_24-
NS_L1_84_Contig10025	#12	879	113	3.48811				CIDRg7-	block_83-block_8-block_1-block_24-block_10-block_31-block_56-block_28-
NS_L1_84_Contig10026	#12	1237	7765	170.322	1	1		DBLd1-CIDRb1-	block_443-block_6-block_226-block_50-block_22-block_8-block_1-block_24-block_10-block_271-block_31-block_56-block_21-
NS_L1_84_Contig10037	#12	4631	732	4.28881	1			DBLa0.4-CIDRa6-DBLd1-CIDRb5-	block_531-block_21-block_33-block_56-block_31-block_10-block_24-block_1-block_8-block_577-block_22-block_50-block_138-block_6-block_9-block_1-block_7-block_12-block_2-block_87-block_29-block_55-block_5-block_433-block_27-block_3-block_16-block_273-block_11-block_4-block_132-block_35-block_15-block_30-block_26-block_49-block_32-block_1-block_8-block_57-block_23-block_6-block_350-block_9-block_184-…
NS_L1_84_Contig10039	#12	1067	241	6.12848				NTSB-DBLa0.13-	block_20-block_17-block_19-block_4-block_13-block_215-block_3-block_79-block_14-block_64-block_5-block_36-block_163-block_2-block_12-block_7-
NS_L1_84_Contig10041	#12	963	116	3.26837	1			CIDRb1-	block_287-block_287-block_8-block_1-block_24-block_10-block_491-block_31-block_56-block_30-block_366-block_21-
NS_L1_84_Contig10048	#12	6650	2028	8.27459	26			NTSB-DBLa0.13-CIDRa2.3-DBLd5-CIDRb4-DBLb9-DBLg9-	block_5-block_86-block_3-block_232-block_11-block_4-block_139-block_18-block_61-block_62-block_1-block_59-block_2-block_5-block_14-block_146-block_3-block_13-block_4-block_65-block_52-block_331-block_10-block_24-block_1-block_8-block_22-block_6-block_9-block_1-block_7-block_12-block_2-block_96-block_5-block_27-block_3-block_16-block_11-block_4-block_74-block_15-block_26-block_10-block_32-block_1-…
NS_L1_84_Contig10056	#12	1095	295	7.30984	3	2		NTSB-DBLa0.11-	block_2-block_88-block_36-block_5-block_64-block_14-block_79-block_3-block_102-block_13-block_4-block_19-block_17-block_20-block_323-
NS_L1_84_Contig10057	#12	1231	196	4.32014	6	1		CIDRb1-	block_50-block_22-block_107-block_8-block_1-block_24-block_10-block_374-block_31-block_56-block_28-block_21-
NS_L1_84_Contig10060	#12	1127	881	21.2106	3	1		CIDRb1-CIDRg2-	block_50-block_22-block_8-block_1-block_24-block_10-block_271-block_31-block_205-block_33-block_21-
NS_L1_84_Contig10061	#12	2161	349	4.38198	2	1		NTSB-DBLa0.14-DBLa0.22-CIDRa3.2-	block_20-block_17-block_19-block_4-block_13-block_102-block_3-block_79-block_14-block_556-block_5-block_36-block_163-block_2-block_12-block_7-block_1-block_184-block_9-block_75-block_6-block_68-block_23-block_104-block_63-block_110-block_67-block_8-
NS_L1_84_Contig10062	#12	1151	377	8.88722				NTSB-DBLa0.15-	block_7-block_12-block_2-block_88-block_36-block_5-block_64-block_14-block_171-block_3-block_13-block_4-block_19-block_17-block_20-
NS_L1_84_Contig10063	#12	1181	340	7.8114	2			CIDRg2-	block_22-block_8-block_1-block_24-block_10-block_31-block_56-block_30-block_21-
NS_L1_84_Contig10064	#12	1189	319	7.27962				CIDRb1-	block_50-block_22-block_107-block_8-block_1-block_24-block_10-block_31-block_28-block_21-block_41-
NS_L1_84_Contig10066	#12	1205	1180	26.5702				NTSB-DBLa0.16-	block_20-block_17-block_19-block_4-block_13-block_494-block_3-block_54-block_14-block_5-block_36-block_153-block_2-
NS_L1_84_Contig10067	#12	2419	202	2.26577	8	1		DBLz6-DBLe6-	block_21-block_529-block_78-block_45-block_1-block_48-block_2-block_213-block_5-block_108-block_3-block_11-block_4-block_76-block_124-block_18-block_93-block_115-block_1-block_99-block_2-block_92-block_559-block_5-block_601-block_14-block_587-block_3-block_13-block_4-block_53-block_235-
NS_L1_84_Contig10069	#12	1256	281	6.07039				NTSB-DBLa0.5-	block_1-block_12-block_2-block_88-block_36-block_5-block_64-block_14-block_171-block_3-block_616-block_13-block_4-block_19-block_17-block_20-block_194-
NS_L1_84_Contig10070	#12	1309	180	3.73107	3	3		DBLa0.11-CIDRa2.1-	block_8-block_57-block_23-block_6-block_9-block_70-block_1-block_7-block_12-block_2-block_36-block_5-block_64-block_14-block_54-block_3-
NS_L1_84_Contig10071	#12	2105	242	3.11934				DBLa0.12-CIDRa2.2-DBLd1-	block_5-block_27-block_156-block_3-block_16-block_158-block_11-block_4-block_35-block_15-block_30-block_49-block_10-block_32-block_1-block_8-block_526-block_57-block_23-block_181-block_6-block_118-block_9-
NS_L1_84_Contig10074	#12	2597	608	6.35231	117	24		DBLz5-DBLe11-DBLe3-	block_21-block_95-block_78-block_45-block_1-block_48-block_2-block_5-block_126-block_3-block_160-block_4-block_76-block_355-block_18-block_45-block_1-block_48-block_2-block_5-block_3-block_4-block_18-block_93-block_1-
NS_L1_84_Contig10075	#12	1364	454	9.03112	3			DBLd7-CIDRb5-	block_21-block_30-block_137-block_56-block_31-block_10-block_24-block_1-block_445-block_8-block_107-block_22-block_50-block_226-block_6-block_9-block_72-
NS_L1_84_Contig10079	#12	1417	170	3.25521	1			CIDRa3.4-CIDRa3.4-DBLd1-	block_168-block_10-block_26-block_30-block_15-block_35-block_4-block_106-block_11-block_109-block_16-block_3-block_27-block_398-block_5-block_29-block_87-block_2-
NS_L1_84_Contig10081	#12	1459	422	7.84797	1			CIDRa2.1-DBLd1-	block_8-block_1-block_32-block_10-block_26-block_30-block_15-block_35-block_4-block_81-block_11-block_77-block_16-block_3-block_27-
NS_L1_84_Contig10086	#12	2133	319	4.05789	41	29		DBLb2-DBLg13-DBLz2-	block_275-block_5-block_14-block_3-block_13-block_4-block_318-block_18-block_45-block_1-block_48-block_2-block_133-block_5-block_86-block_3-block_201-block_11-block_4-block_15-block_18-block_481-block_61-
NS_L1_84_Contig10090	#12	1815	304	4.54461	2	1		DBLd1-CIDRb6-	block_29-block_105-block_2-block_12-block_7-block_1-block_72-block_9-block_496-block_6-block_173-block_50-block_22-block_172-block_8-block_1-block_24-block_10-block_31-block_56-block_33-block_366-block_21-
NS_L1_84_Contig10094	#12	4562	793	4.71648	2			DBLa0.1-CIDRa3.1-DBLd1-CIDRg7-	block_41-block_21-block_56-block_31-block_10-block_24-block_1-block_8-block_83-block_22-block_85-block_103-block_6-block_178-block_9-block_1-block_7-block_12-block_2-block_87-block_29-block_301-block_5-block_461-block_27-block_3-block_16-block_158-block_11-block_106-block_4-block_35-block_15-block_26-block_10-block_32-block_292-block_1-block_8-block_67-block_110-block_63-block_23-block_68-block_6…
NS_L1_84_Contig10095	#12	2294	623	7.36876	106	75	PfIT_070016600 PfDd2_070015900	DBLb2-DBLd9-CIDRg9-DBLg3-	block_18-block_15-block_74-block_4-block_11-block_16-block_3-block_27-block_5-block_90-block_96-block_2-block_166-block_7-block_1-block_9-block_6-block_148-block_22-block_176-block_8-block_1-block_24-block_10-block_31-block_15-block_74-block_4-
NS_L1_84_Contig10096	#12	2273	2482	29.628	6	3		NTSB-DBLa0.15-CIDRa2.6-	block_8-block_116-block_57-block_154-block_245-block_71-block_23-block_143-block_6-block_118-block_9-block_34-block_1-block_7-block_12-block_2-block_163-block_36-block_5-block_64-block_14-block_79-block_3-block_13-block_4-block_19-block_17-block_20-block_71-
NS_L1_84_Contig10097	#12	2293	1106	13.0873	16			DBLg2-DBLd1-CIDRb6-	block_2-block_59-block_1-block_129-block_61-block_18-block_28-block_15-block_35-block_132-block_4-block_81-block_11-block_77-block_16-block_3-block_359-block_27-block_5-block_29-block_2-block_12-block_7-block_1-block_497-block_9-block_443-block_6-block_226-
NS_L1_84_Contig10099	#12	4239	13656	87.4098	2			NTSB-DBLa0.18-CIDRa3.1-DBLd1-	block_9-block_1-block_7-block_12-block_2-block_29-block_301-block_5-block_433-block_27-block_253-block_3-block_16-block_11-block_73-block_4-block_34-block_35-block_15-block_26-block_426-block_10-block_168-block_32-block_1-block_8-block_333-block_339-block_63-block_104-block_23-block_68-block_6-block_9-block_70-block_1-block_7-block_12-block_2-block_36-block_5-block_64-block_14-block_171-block_3-b…
NS_L1_84_Contig10101	#12	4045	933	6.2584	4			DBLa0.12-CIDRa2.2-DBLd1-CIDRb1-	block_1-block_70-block_9-block_118-block_6-block_23-block_57-block_526-block_8-block_1-block_32-block_10-block_26-block_15-block_35-block_435-block_4-block_11-block_16-block_3-block_253-block_27-block_5-block_29-block_2-block_12-block_7-block_1-block_72-block_9-block_6-block_243-block_50-block_22-block_159-block_8-block_1-block_24-block_10-block_271-block_31-block_205-block_28-block_21-
NS_L1_84_Contig10102	#12	2522	628	6.75639	18			DBLa0.1-CIDRa3.1-DBLd1-	block_163-block_2-block_12-block_7-block_1-block_9-block_75-block_6-block_68-block_23-block_63-block_114-block_67-block_316-block_8-block_1-block_299-block_32-block_372-block_10-block_26-block_15-block_35-block_4-block_81-block_11-block_109-block_3-
NS_L1_84_Contig10103	#12	2610	775	8.05678	1			DBLa0.16-CIDRa3.4-DBLd1-	block_2-block_87-block_29-block_5-block_27-block_177-block_437-block_3-block_16-block_11-block_4-block_35-block_15-block_30-block_26-block_10-block_125-block_32-block_334-block_1-block_8-block_316-block_67-block_63-block_23-block_68-block_6-block_348-block_9-block_34-
NS_L1_84_Contig10104	#12	3339	824	6.69593				DBLa0.5-DBLa0.13-CIDRa2.9-CIDRa3.4-DBLd1-	block_2-block_29-block_448-block_55-block_5-block_27-block_156-block_3-block_16-block_11-block_4-block_35-block_15-block_30-block_26-block_73-block_10-block_28-block_32-block_1-block_472-block_8-block_116-block_63-block_154-block_23-block_143-block_6-block_75-block_9-block_34-block_1-block_7-block_12-block_2-block_36-block_5-block_345-block_14-block_79-block_3-block_215-block_13-
NS_L1_84_Contig10106	#12	2856	739	7.02079	3	1		DBLa0.22-CIDRa3.1-DBLb5-	block_61-block_62-block_1-block_382-block_59-block_2-block_183-block_5-block_436-block_14-block_467-block_3-block_234-block_13-block_189-block_4-block_53-block_65-block_52-block_101-block_10-block_560-block_32-block_1-block_8-block_67-block_110-block_63-block_391-block_23-block_68-block_6-block_75-block_9-block_34-block_492-block_1-
NS_L1_84_Contig10107	#12	2964	4661	42.6679	3			CIDRa3.4-DBLd1-CIDRb1-	block_10-block_26-block_530-block_15-block_35-block_4-block_490-block_165-block_11-block_109-block_16-block_3-block_253-block_27-block_5-block_55-block_29-block_87-block_2-block_12-block_7-block_1-block_72-block_9-block_443-block_6-block_173-block_50-block_22-block_8-block_1-block_10-block_31-block_56-block_33-block_376-block_21-
NS_L1_84_Contig10109	#12	5413	2348	11.7696	12			NTSB-DBLa0.16-CIDRa3.4-DBLd1-CIDRb1-	block_21-block_137-block_205-block_56-block_31-block_10-block_24-block_1-block_8-block_107-block_22-block_50-block_6-block_9-block_1-block_7-block_12-block_2-block_198-block_29-block_55-block_5-block_27-block_3-block_16-block_109-block_11-block_453-block_4-block_35-block_15-block_30-block_26-block_10-block_71-block_32-block_1-block_8-block_354-block_67-block_63-block_104-block_23-block_68-block_6…
NS_L1_84_Contig10110	#12	4220	1752	11.2648	5			DBLa0.11-CIDRa2.4-DBLd1-CIDRg4-	block_21-block_33-block_56-block_543-block_10-block_24-block_1-block_8-block_83-block_22-block_85-block_103-block_6-block_458-block_9-block_1-block_7-block_12-block_2-block_87-block_55-block_5-block_27-block_156-block_3-block_16-block_158-block_11-block_81-block_4-block_35-block_15-block_332-block_49-block_32-block_1-block_8-block_116-block_57-block_23-block_6-block_118-block_9-block_70-block_1-b…
NS_L1_84_Contig10111	#12	5479	2403	11.9002	44	14		NTSB-DBLa0.11-CIDRa2.4-DBLd1-CIDRg7-	block_525-block_20-block_17-block_19-block_4-block_13-block_102-block_3-block_54-block_14-block_64-block_5-block_36-block_88-block_2-block_12-block_7-block_1-block_70-block_9-block_118-block_6-block_181-block_57-block_8-block_1-block_32-block_10-block_49-block_30-block_15-block_35-block_4-block_81-block_11-block_16-block_3-block_253-block_27-block_5-block_55-block_29-block_2-block_12-block_7-bloc…
NS_L1_84_Contig10112	#12	6642	2379	9.71842	7			NTSB-DBLa0.19-CIDRa2.8-DBLd1-CIDRb1-DBLg10-	block_323-block_20-block_17-block_19-block_4-block_13-block_494-block_3-block_54-block_14-block_64-block_5-block_36-block_163-block_2-block_12-block_7-block_1-block_492-block_34-block_9-block_268-block_6-block_181-block_23-block_154-block_57-block_626-block_8-block_1-block_32-block_10-block_26-block_15-block_35-block_4-block_73-block_11-block_16-block_3-block_252-block_452-block_5-block_55-block_…
NS_L1_84_Contig10113	#12	5252	1679	8.67413	6			NTSB-DBLa0.14-CIDRa4-DBLd1-CIDRb1-	block_21-block_56-block_31-block_10-block_24-block_1-block_8-block_159-block_22-block_50-block_173-block_6-block_9-block_1-block_7-block_12-block_2-block_87-block_29-block_55-block_5-block_27-block_3-block_256-block_406-block_11-block_4-block_34-block_35-block_15-block_26-block_10-block_32-block_1-block_8-block_63-block_23-block_6-block_9-block_70-block_1-block_7-block_12-block_2-block_36-block_5…
NS_L1_84_Contig10114	#12	6003	10492	47.4231	42			NTSB-DBLa0.15-CIDRa3.2-DBLd1-CIDRb6-	block_20-block_17-block_19-block_4-block_13-block_188-block_3-block_79-block_14-block_210-block_5-block_36-block_88-block_2-block_12-block_7-block_1-block_34-block_9-block_75-block_6-block_68-block_23-block_63-block_110-block_67-block_316-block_8-block_1-block_32-block_10-block_26-block_30-block_15-block_35-block_4-block_11-block_77-block_16-block_3-block_27-block_5-block_55-block_29-block_87-blo…
NS_L1_84_Contig1143	#12	501	19	1.029				NTSB-DBLa0.4-	block_13-block_4-block_19-block_17-block_20-
NS_L1_84_Contig1407	#12	640	48	2.03499				DBLd1-	block_16-block_3-block_228-block_82-block_5-block_55-block_448-block_29-block_105-
NS_L1_84_Contig1668	#12	622	38	1.65765				DBLa0.12-CIDRa2.4-	block_2-block_12-block_7-block_1-block_70-block_9-block_118-block_6-
NS_L1_84_Contig2140	#12	913	66	1.96143				DBLd1-	block_5-block_398-block_27-block_228-block_3-block_16-block_77-block_11-block_81-block_4-block_35-block_15-block_593-
NS_L1_84_Contig270	#12	1026	62	1.63962	3			DBLd1-CIDRb1-	block_29-block_2-block_12-block_7-block_1-block_72-block_9-block_6-block_226-block_50-block_22-
NS_L1_84_Contig2786	#12	569	35	1.669				DBLa0.11-CIDRa2.6-	block_12-block_7-block_1-block_70-block_9-block_118-block_6-block_143-
NS_L1_84_Contig2898	#12	686	78	3.08511	4	1		NTSB-DBLa0.24-	block_20-block_17-block_19-block_4-block_13-block_381-block_3-block_54-
NS_L1_84_Contig3121	#12	528	32	1.64443				NTSB-DBLa0.8-	block_20-block_17-block_19-block_4-
NS_L1_84_Contig3204	#12	1333	170	3.46034				DBLd1-	block_30-block_15-block_35-block_4-block_11-block_273-block_16-block_3-block_228-block_82-block_5-block_55-block_448-block_29-block_105-block_2-block_12-
NS_L1_84_Contig3502	#12	597	37	1.68162				DBLd3-DBLd1-	block_10-block_26-block_30-block_15-block_35-block_4-
NS_L1_84_Contig3511	#12	564	20	0.962168	3	3		CIDRa6-DBLb5-	block_1-block_32-block_10-block_101-block_52-block_65-
NS_L1_84_Contig3577	#12	706	12	0.461187				DBLb5-	block_146-block_14-block_5-block_400-block_2-block_59-block_1-block_62-block_209-
NS_L1_84_Contig3601	#12	594	46	2.10122	9	9		DBLd1-	block_16-block_3-block_27-block_5-block_55-block_29-
NS_L1_84_Contig3663	#12	536	38	1.92362	7	7		DBLa0.4-CIDRa6-	block_1-block_9-block_455-block_6-block_23-
NS_L1_84_Contig3722	#12	579	33	1.54645				CIDRg5-	block_24-block_10-block_195-block_31-block_56-
NS_L1_84_Contig373	#12	3532	501	3.84873	102	61	PfIT_070016600 PfDd2_070015900	DBLa0.3-CIDRa5-DBLb5-	block_17-block_19-block_4-block_13-block_3-block_204-block_14-block_5-block_60-block_2-block_12-block_7-block_1-block_70-block_9-block_455-block_6-block_23-block_57-block_8-block_1-block_32-block_10-block_101-block_52-block_65-block_53-block_4-block_13-block_3-block_467-block_14-block_199-block_5-block_400-block_2-block_59-block_1-block_523-block_62-block_61-block_18-
NS_L1_84_Contig3763	#12	571	28	1.33052				CIDRb5-	block_24-block_10-block_31-block_56-block_137-block_120-
NS_L1_84_Contig3777	#12	578	32	1.50218	6	6		CIDRg5-	block_458-block_6-block_103-block_85-block_22-block_83-block_8-block_1-
NS_L1_84_Contig3794	#12	588	47	2.16881	6	6		DBLz2-	block_318-block_4-block_13-block_3-
NS_L1_84_Contig3834	#12	606	39	1.74619	4	4		DBLb6-	block_174-block_3-block_13-block_4-block_53-block_65-block_52-
NS_L1_84_Contig3848	#12	623	25	1.08881				CIDRg10-	block_33-block_56-block_31-block_10-block_24-block_1-
NS_L1_84_Contig3852	#12	615	32	1.41181				DBLd1-	block_29-block_55-block_5-block_27-block_177-block_3-block_16-
NS_L1_84_Contig3950	#12	678	77	3.08149	31	30		DBLe7-	block_3-block_108-block_5-block_213-block_2-
NS_L1_84_Contig3964	#12	687	34	1.34283	3	2		DBLe10-	block_4-block_160-block_3-block_126-block_5-block_222-block_2-block_48-block_1-
NS_L1_84_Contig4069	#12	766	140	4.95906	8	5		CIDRg2-	block_10-block_24-block_1-block_8-block_22-block_85-block_477-block_6-
NS_L1_84_Contig4086	#12	772	53	1.86277	3			CIDRb5-CIDRa1.5-	block_28-block_127-block_31-block_606-block_10-block_24-block_1-block_8-
NS_L1_84_Contig4092	#12	1046	57	1.47857	18			DBLa0.13-CIDRa2.6-	block_1-block_34-block_9-block_75-block_6-block_251-block_23-block_514-block_57-block_116-block_8-block_1-block_334-block_32-
NS_L1_84_Contig4096	#12	3325	548	4.47187				CIDRa2.2-DBLd1-CIDRb1-	block_32-block_10-block_26-block_15-block_35-block_4-block_357-block_11-block_77-block_16-block_3-block_27-block_5-block_55-block_369-block_29-block_2-block_12-block_7-block_1-block_72-block_9-block_6-block_138-block_50-block_22-block_159-block_8-block_1-block_24-block_10-block_31-block_56-block_28-block_21-
NS_L1_84_Contig4170	#12	856	68	2.15544	15	15		DBLd4-CIDRg2-	block_9-block_6-block_477-block_85-block_22-block_176-block_8-block_1-block_24-
NS_L1_84_Contig4171	#12	1520	1067	19.0467				DBLd1-	block_15-block_35-block_4-block_106-block_11-block_16-block_3-block_228-block_27-block_561-block_5-block_55-block_448-block_2-block_12-block_7-block_1-block_72-block_9-
NS_L1_84_Contig4179	#12	1079	114	2.86671	1			NTSB-DBLa0.5-	block_20-block_17-block_19-block_4-block_13-block_135-block_3-block_79-block_14-block_64-block_5-block_36-block_88-block_2-block_12-
NS_L1_84_Contig4185	#12	913	60	1.78312				DBLd1-	block_4-block_11-block_158-block_16-block_3-block_510-block_177-block_27-block_5-block_55-block_29-block_105-block_2-block_12-
NS_L1_84_Contig4355	#12	1056	77	1.97846				DBLd1-	block_4-block_81-block_106-block_11-block_158-block_16-block_3-block_156-block_27-block_5-block_55-block_29-block_2-
NS_L1_84_Contig4362	#12	1132	1142	27.3728	1			CIDRg11-	block_1-block_567-block_24-block_10-block_31-block_56-block_28-block_366-block_21-block_182-block_182-
NS_L1_84_Contig4501	#12	1326	356	7.28461	2			DBLd7-CIDRb1-	block_30-block_137-block_56-block_31-block_10-block_24-block_1-block_445-block_8-block_107-block_22-block_50-block_226-block_6-block_9-block_72-
NS_L1_84_Contig4513	#12	1356	968	19.3694	18	3		DBLd1-CIDRb1-	block_2-block_7-block_1-block_72-block_9-block_6-block_226-block_50-block_22-block_107-block_8-block_1-block_456-block_24-block_10-block_195-block_31-
NS_L1_84_Contig4614	#12	1660	122	1.99412	8			DBLb7-DBLd1-	block_16-block_77-block_11-block_165-block_81-block_4-block_35-block_15-block_28-block_18-block_61-block_62-block_119-block_1-block_382-block_59-block_2-block_5-block_436-block_14-block_272-block_3-block_266-block_13-
NS_L1_84_Contig4642	#12	2285	224	2.65988				CIDRa2.2-DBLd1-CIDRb1-	block_1-block_32-block_10-block_114-block_15-block_35-block_4-block_106-block_11-block_158-block_16-block_3-block_185-block_27-block_5-block_29-block_87-block_2-block_12-block_7-block_1-block_9-block_443-block_6-
NS_L1_84_Contig4646	#12	1806	175	2.62918	5	3		DBLb9-DBLg2-	block_182-block_21-block_169-block_18-block_61-block_129-block_1-block_59-block_2-block_29-block_5-block_98-block_3-block_16-block_11-block_4-block_139-block_18-block_61-block_62-
NS_L1_84_Contig4729	#12	7496	2234	8.08637	67	1		CIDRg1-DBLe2-DBLe4-CIDRa6-DBLb5-DBLg12-DBLd4-CIDRg1-	block_57-block_8-block_1-block_32-block_10-block_101-block_52-block_65-block_53-block_4-block_13-block_3-block_146-block_14-block_5-block_187-block_2-block_59-block_1-block_62-block_61-block_18-block_15-block_4-block_11-block_16-block_3-block_86-block_5-block_29-block_2-block_136-block_1-block_45-block_78-block_15-block_35-block_4-block_11-block_77-block_16-block_3-block_82-block_5-block_96-block…
NS_L1_84_Contig4731	#12	2521	1032	11.1073	11			NTSB-DBLa0.21-CIDRa2.1-	block_26-block_10-block_32-block_1-block_8-block_116-block_57-block_23-block_181-block_6-block_413-block_9-block_70-block_1-block_7-block_12-block_2-block_36-block_5-block_210-block_14-block_54-block_3-block_13-block_4-block_19-block_17-block_20-
NS_L1_84_Contig4754	#12	3146	601	5.18341	2			DBLa0.11-CIDRa2.4-DBLd1-	block_12-block_7-block_1-block_70-block_9-block_6-block_23-block_57-block_116-block_8-block_1-block_32-block_10-block_26-block_30-block_35-block_4-block_11-block_16-block_3-block_185-block_82-block_5-block_55-block_29-block_87-block_2-block_12-block_7-block_1-block_122-block_9-block_178-
NS_L1_84_Contig52	#12	720	38	1.43203				DBLd1-	block_73-block_11-block_158-block_16-block_3-block_27-block_5-block_55-
NS_L1_84_Contig5306	#12	940	38	1.09687	1			DBLb5-DBLg10-	block_133-block_5-block_86-block_3-block_16-block_11-block_4-block_74-block_15-block_18-block_61-block_209-
NS_L1_84_Contig5368	#12	716	45	1.7053	935	923		CIDRa1.3-DBLb1-CIDRa1.3-	block_57-block_8-block_1-block_121-block_368-block_10-block_141-block_52-block_65-
NS_L1_84_Contig5620	#12	592	13	0.595829				DBLz6-	block_53-block_4-block_13-block_385-block_3-block_429-block_14-block_5-block_92-
NS_L1_84_Contig644	#12	883	120	3.6874				DBLd4-CIDRg4-	block_2-block_12-block_7-block_1-block_122-block_9-block_178-block_6-block_103-block_85-block_22-block_83-block_8-
NS_L1_84_Contig6931	#12	1137	111	2.64888				CIDRa2.4-DBLd1-	block_1-block_32-block_10-block_26-block_30-block_15-block_35-block_4-block_11-block_16-
NS_L1_84_Contig7124	#12	1778	573	8.74426	472	384	PfGA01_050037000 PfSN01_050037600	DBLg8-DBLz1-	block_93-block_115-block_1-block_99-block_2-block_92-block_549-block_5-block_14-block_3-block_4-block_53-block_550-block_52-block_546-block_18-block_45-block_425-block_1-block_48-block_2-block_427-
NS_L1_84_Contig739	#12	630	74	3.18707	4	4		DBLz5-DBLe4-	block_92-block_2-block_403-block_1-block_430-block_115-block_93-block_18-block_407-
NS_L1_84_Contig7399	#12	1563	431	7.48201	261	152	PfKH01_050037900	DBLz1-DBLe5-	block_18-block_124-block_76-block_4-block_475-block_11-block_3-block_126-block_5-block_142-block_2-block_200-block_466-block_97-block_274-block_474-block_21-block_41-block_196-block_43-
NS_L1_84_Contig7508	#12	548	61	3.02029				CIDRg10-	block_24-block_10-block_271-block_31-block_56-block_137-block_294-block_21-
NS_L1_84_Contig7798	#12	531	20	1.02196				CIDRa3.1-	block_1-block_299-block_32-block_10-block_110-
NS_L1_84_Contig7840	#12	1055	73	1.87746				DBLa0.1-CIDRa3.4-	block_239-block_34-block_9-block_350-block_6-block_68-block_23-block_104-block_63-block_114-block_67-block_354-block_8-block_1-block_299-block_32-
NS_L1_84_Contig7868	#12	545	61	3.03692	1	1		NTSB-DBLa0.11-	block_71-block_20-block_17-block_19-block_4-block_13-
NS_L1_84_Contig7912	#12	844	41	1.31808	12	9		DBLg2-	block_10-block_62-block_1-block_59-block_2-block_29-block_5-block_86-block_3-block_16-
NS_L1_84_Contig7915	#12	522	13	0.67573	4	4		DBLa0.5-	block_14-block_64-block_5-block_36-block_153-block_2-block_12-block_7-
NS_L1_84_Contig7999	#12	676	28	1.12386	8	5		DBLg10-	block_5-block_29-block_2-block_48-block_579-block_1-block_45-block_18-
NS_L1_84_Contig8069	#12	758	27	0.966484	4	3		CIDRg10-	block_28-block_56-block_31-block_543-block_10-block_24-block_1-block_8-block_83-
NS_L1_84_Contig8146	#12	678	47	1.88091				CIDRb6-	block_1-block_24-block_10-block_195-block_31-block_56-block_21-
NS_L1_84_Contig8155	#12	584	14	0.650452				DBLd1-DBLd1-	block_26-block_30-block_33-block_15-block_35-block_4-block_73-
NS_L1_84_Contig8175	#12	511	672	35.6819	4	4		CIDRa2.5-	block_57-block_116-block_8-block_226-block_1-block_32-
NS_L1_84_Contig8223	#12	572	22	1.04358				CIDRa3.3-	block_6-block_68-block_23-block_104-block_63-block_114-block_67-block_8-
NS_L1_84_Contig8256	#12	2767	1630	15.9837	7			DBLa0.19-CIDRa2.3-CIDRa3.4-DBLd1-	block_12-block_7-block_1-block_492-block_184-block_9-block_6-block_127-block_23-block_57-block_116-block_8-block_1-block_32-block_125-block_10-block_26-block_30-block_15-block_35-block_4-block_517-block_11-block_109-block_16-block_3-block_27-block_5-block_55-block_29-block_87-block_2-
NS_L1_84_Contig8286	#12	530	19	0.972697	83	83		DBLe1-	block_1-block_45-block_18-block_612-
NS_L1_84_Contig8290	#12	710	40	1.52863	2	2		CIDRa5-DBLb5-	block_65-block_52-block_101-block_10-block_32-block_1-block_8-
NS_L1_84_Contig8336	#12	713	41	1.56025				DBLd1-CIDRb1-	block_7-block_1-block_72-block_9-block_6-block_500-block_50-block_22-block_287-
NS_L1_84_Contig8374	#12	690	78	3.06722	132	130		DBLe4-	block_407-block_76-block_4-block_3-block_274-block_5-block_2-
NS_L1_84_Contig8377	#12	1153	50	1.17663	7			CIDRa2.9-CIDRa3.1-DBLd1-	block_132-block_35-block_15-block_30-block_26-block_10-block_372-block_32-block_1-block_8-block_116-block_63-
NS_L1_84_Contig8394	#12	747	21	0.762779				CIDRa4-	block_63-block_110-block_67-block_8-block_1-block_32-block_10-
NS_L1_84_Contig8426	#12	3836	4104	29.0288	12			DBLa0.1-CIDRa3.1-DBLd1-CIDRg8-	block_8-block_83-block_22-block_85-block_103-block_6-block_178-block_9-block_370-block_1-block_7-block_12-block_2-block_87-block_29-block_301-block_5-block_487-block_3-block_16-block_11-block_106-block_81-block_4-block_35-block_15-block_30-block_26-block_10-block_32-block_1-block_8-block_67-block_110-block_63-block_71-block_23-block_68-block_6-block_75-block_9-block_34-block_1-block_7-block_12-
NS_L1_84_Contig8440	#12	1128	120	2.8865	27	25		NTSB-DBLa0.4-	block_217-block_20-block_17-block_19-block_4-block_13-block_3-block_171-block_14-block_5-block_2-block_12-block_7-
NS_L1_84_Contig8497	#12	789	125	4.29866				CIDRg7-	block_1-block_24-block_10-block_606-block_31-block_56-block_33-block_21-
NS_L1_84_Contig9003	#12	782	102	3.53911	1	1		DBLa0.23-	block_19-block_4-block_13-block_102-block_3-block_386-block_14-block_64-block_5-block_36-block_153-block_2-
NS_L1_84_Contig9022	#12	720	36	1.35666				CIDRb1-	block_8-block_1-block_24-block_10-block_606-block_31-block_56-block_137-
NS_L1_84_Contig9093	#12	914	35	1.03902	4
NS_L1_84_Contig9204	#12	516	35	1.84043	1	1		DBLb2-DBLg5-	block_61-block_18-block_15-block_4-
NS_L1_84_Contig9207	#12	508	14	0.747764				CIDRa3.3-	block_67-block_114-block_63-block_104-block_23-block_68-block_6-
NS_L1_84_Contig9213	#12	515	63	3.3192				CIDRb1-	block_10-block_31-block_127-block_254-block_21-
NS_L1_84_Contig9218	#12	518	35	1.83332				NTSB-DBLa0.24-	block_71-block_20-block_17-block_19-block_4-
NS_L1_84_Contig9223	#12	530	38	1.94539				DBLd1-	block_82-block_3-block_16-block_77-block_11-block_81-block_4-
NS_L1_84_Contig9230	#12	538	12	0.6052				DBLz4-	block_52-block_123-block_338-block_53-block_4-block_13-block_393-block_3-
NS_L1_84_Contig9237	#12	551	88	4.33342				NTSB-DBLa0.5-	block_323-block_20-block_17-block_19-block_4-block_13-
NS_L1_84_Contig9240	#12	574	62	2.93076				DBLz4-	block_2-block_99-block_1-block_283-block_93-block_18-block_280-
NS_L1_84_Contig9241	#12	557	68	3.31248				DBLa0.16-	block_3-block_215-block_13-block_4-block_19-block_17-block_20-
NS_L1_84_Contig9253	#12	591	61	2.80054	1	1		DBLd4-CIDRg7-	block_1-block_370-block_9-block_178-block_6-block_103-block_85-block_571-block_22-block_83-
NS_L1_84_Contig9254	#12	605	64	2.87028	3	3		DBLd1-CIDRg7-	block_1-block_122-block_9-block_6-block_103-block_85-block_571-block_22-
NS_L1_84_Contig9256	#12	597	39	1.77252	7	7		DBLa0.11-	block_13-block_215-block_3-block_54-block_14-block_64-block_5-block_36-block_163-
NS_L1_84_Contig9262	#12	613	45	1.99183				CIDRa2.8-DBLd1-	block_35-block_15-block_30-block_26-block_246-block_10-block_372-block_32-
NS_L1_84_Contig9270	#12	1710	648	10.282	1			DBLd1-CIDRb3-DBLb3-	block_21-block_127-block_31-block_10-block_24-block_1-block_8-block_22-block_50-block_149-block_6-block_9-block_72-block_1-block_7-block_12-
NS_L1_84_Contig9273	#12	645	44	1.85094	3	1		CIDRa2.5-DBLd1-	block_4-block_35-block_15-block_30-block_26-block_49-block_10-block_125-
NS_L1_84_Contig9279	#12	1152	63	1.48384				DBLz4-	block_18-block_93-block_283-block_1-block_99-block_2-block_92-block_284-block_5-block_14-
NS_L1_84_Contig9281	#12	1088	148	3.69091	1055	1012	PfKH01_050037900 PF3D7_0533100 PfGB4_050038700	NTSA-DBLa1.4-	block_264-block_20-block_17-block_19-block_4-block_13-block_464-block_3-block_248-block_14-block_5-block_60-block_2-block_12-
NS_L1_84_Contig9283	#12	687	21	0.829397	1	1		CIDRb1-	block_22-block_107-block_8-block_1-block_24-block_10-block_459-
NS_L1_84_Contig9284	#12	964	31	0.872539	2			CIDRa2.2-DBLd1-	block_35-block_15-block_30-block_26-block_10-block_32-block_1-block_8-block_526-
NS_L1_84_Contig9285	#12	737	491	18.0765				DBLg2-	block_21-block_28-block_18-block_61-block_129-block_1-block_59-block_2-block_609-
NS_L1_84_Contig9287	#12	744	57	2.07875	1			DBLz4-	block_280-block_582-block_18-block_93-block_283-block_1-block_99-block_2-block_92-
NS_L1_84_Contig9290	#12	748	34	1.23332	1			DBLg8-DBLz1-	block_2-block_48-block_1-block_425-block_45-block_18-block_546-block_52-block_550-block_19-
NS_L1_84_Contig9295	#12	1381	184	3.61513	30	19		CIDRg1-DBLe2-	block_8-block_1-block_24-block_10-block_31-block_261-block_4-block_11-block_3-block_265-block_5-block_415-block_2-
NS_L1_84_Contig9303	#12	2996	839	7.59837	5			CIDRa3.3-CIDRa3.4-DBLd1-CIDRg4-	block_21-block_33-block_56-block_31-block_10-block_24-block_1-block_8-block_83-block_22-block_85-block_6-block_458-block_9-block_1-block_7-block_12-block_2-block_29-block_5-block_27-block_419-block_510-block_3-block_16-block_11-block_81-block_4-block_35-block_15-block_30-block_26-block_10-
NS_L1_84_Contig9306	#12	872	69	2.147				CIDRg11-	block_8-block_1-block_24-block_10-block_31-block_56-block_137-block_612-block_21-block_41-
NS_L1_84_Contig9309	#12	939	60	1.73375	11	11		DBLa0.10-	block_2-block_36-block_5-block_64-block_14-block_54-block_3-block_135-block_13-block_4-
NS_L1_84_Contig9319	#12	958	67	1.89762	4	2		DBLd1-CIDRb6-	block_1-block_8-block_172-block_22-block_50-block_138-block_6-block_9-block_1-block_7-block_12-block_2-
NS_L1_84_Contig9321	#12	982	117	3.23277	2	1		DBLa0.5-CIDRa2.3-	block_7-block_1-block_395-block_34-block_9-block_118-block_6-block_23-block_57-block_526-block_8-block_1-
NS_L1_84_Contig9323	#12	4374	6373	39.5335	243	59	PfHB3_050037800	NTSA-DBLa1.1-CIDRa1.2-DBLb11-DBLg1-	block_86-block_3-block_16-block_11-block_4-block_139-block_15-block_18-block_61-block_62-block_1-block_604-block_59-block_2-block_183-block_605-block_5-block_14-block_457-block_3-block_234-block_13-block_189-block_4-block_53-block_65-block_141-block_10-block_121-block_1-block_8-block_57-block_23-block_6-block_536-block_9-block_70-block_1-block_7-block_12-block_2-block_60-block_5-block_14-block_21…
NS_L1_84_Contig9325	#12	999	60	1.62962				DBLd1-	block_16-block_3-block_177-block_27-block_5-block_301-block_29-block_2-block_12-block_7-block_1-block_72-block_9-block_6-block_243-
NS_L1_84_Contig9326	#12	1021	164	4.35831				DBLa0.16-	block_34-block_492-block_1-block_7-block_12-block_2-block_163-block_36-block_5-block_64-block_14-block_54-block_3-block_215-block_13-block_4-block_19-
NS_L1_84_Contig9327	#12	1034	100	2.62409	2			DBLd1-CIDRg2-	block_27-block_5-block_55-block_29-block_424-block_2-block_12-block_7-block_1-block_122-block_9-block_178-block_6-block_477-block_85-
NS_L1_84_Contig9332	#12	1104	199	4.89085				NTSB-DBLa0.11-	block_2-block_88-block_36-block_5-block_64-block_14-block_54-block_3-block_188-block_13-block_4-block_19-block_17-block_20-
NS_L1_84_Contig9333	#12	1110	746	18.2354				NTSB-DBLa0.15-	block_323-block_20-block_17-block_19-block_4-block_13-block_233-block_3-block_79-block_14-block_345-block_5-block_60-block_2-
NS_L1_84_Contig9336	#12	1217	395	8.80657	4			DBLd7-CIDRb1-	block_443-block_6-block_226-block_50-block_22-block_287-block_8-block_1-block_24-block_10-block_271-block_31-block_56-block_21-
NS_L1_84_Contig9338	#12	2793	1352	13.1343	105	74	PfIT_070016600 PfDd2_070015900	DBLg11-DBLz4-	block_182-block_21-block_280-block_582-block_18-block_93-block_283-block_1-block_99-block_2-block_92-block_284-block_5-block_14-block_387-block_3-block_462-block_13-block_4-block_53-block_338-block_123-block_52-block_18-block_45-block_1-block_48-block_2-block_94-block_5-block_98-block_3-block_16-block_11-block_4-
NS_L1_84_Contig9353	#12	2443	258	2.86547	1			CIDRa2.4-DBLd1-	block_6-block_496-block_9-block_72-block_1-block_7-block_12-block_2-block_87-block_29-block_55-block_5-block_82-block_573-block_3-block_16-block_77-block_11-block_73-block_4-block_35-block_15-block_30-block_26-block_10-block_32-block_1-block_8-block_116-block_23-
NS_L1_84_Contig9354	#12	3556	595	4.53999	22			CIDRa2.5-DBLd1-CIDRb1-	block_57-block_116-block_8-block_472-block_1-block_32-block_372-block_10-block_26-block_15-block_35-block_132-block_4-block_517-block_11-block_77-block_16-block_3-block_27-block_5-block_301-block_29-block_105-block_2-block_12-block_7-block_1-block_9-block_6-block_180-block_50-block_22-block_107-block_8-block_1-block_24-block_10-block_31-block_127-block_21-
NS_L1_84_Contig9546	#12	1714	1244	19.6929	2	1		DBLd1-CIDRb1-CIDRa3.4-	block_12-block_7-block_1-block_9-block_6-block_180-block_50-block_22-block_107-block_8-block_1-block_24-block_10-block_31-block_56-block_127-block_21-block_41-
NS_L1_84_Contig9580	#12	668	87	3.53381	12	12		DBLa0.13-CIDRa2.4-	block_1-block_239-block_34-block_9-block_75-block_6-block_181-block_23-block_57-block_116-
NS_L1_84_Contig9669	#12	2790	246	2.39238	12			CIDRa2.4-DBLd1-CIDRb1-	block_8-block_159-block_22-block_50-block_138-block_6-block_9-block_72-block_1-block_7-block_12-block_2-block_87-block_29-block_249-block_5-block_27-block_228-block_3-block_16-block_109-block_11-block_4-block_35-block_15-block_30-block_26-block_10-block_1-block_8-block_116-block_23-block_181-
NS_L1_84_Contig9679	#12	1515	184	3.29538	3	2		DBLg3-DBLz4-	block_3-block_13-block_4-block_315-block_52-block_18-block_581-block_45-block_279-block_1-block_48-block_2-block_167-block_5-block_98-block_3-block_16-block_11-block_4-
NS_L1_84_Contig9689	#12	1824	197	2.9305	1			CIDRa2.1-DBLd1-	block_8-block_1-block_32-block_10-block_49-block_506-block_15-block_35-block_4-block_81-block_106-block_11-block_16-block_3-block_27-block_398-block_5-block_55-block_29-block_87-block_2-
NS_L1_84_Contig9702	#12	828	44	1.44186
NS_L1_84_Contig9731	#12	787	28	0.965347	225	217		DBLz1-	block_546-block_52-block_550-block_19-block_4-block_13-block_545-block_3-block_603-block_14-block_602-block_5-
NS_L1_84_Contig9809	#12	777	47	1.64126	2	2		DBLb1-	block_62-block_119-block_1-block_59-block_2-block_499-block_5-block_14-block_146-block_3-
NS_L1_84_Contig9835	#12	3422	1021	8.09554	6			CIDRa3.1-DBLd1-CIDRg1-	block_8-block_1-block_512-block_32-block_10-block_26-block_30-block_15-block_35-block_132-block_4-block_66-block_11-block_109-block_16-block_3-block_437-block_177-block_27-block_5-block_479-block_29-block_2-block_12-block_7-block_1-block_9-block_6-block_22-block_522-block_8-block_1-block_24-block_10-block_606-block_31-block_33-block_21-
NS_L1_84_Contig9838	#12	1191	148	3.37171	2			CIDRb1-	block_173-block_50-block_22-block_159-block_8-block_1-block_24-block_10-block_271-block_31-block_56-block_137-block_33-block_21-
NS_L1_84_Contig9841	#12	765	52	1.84434				DBLd1-CIDRb1-	block_1-block_72-block_9-block_6-block_243-block_50-block_22-block_107-block_8-
NS_L1_84_Contig9856	#12	2911	1591	14.8296	145	11	PfHB3_050037800	DBLg1-DBLe1-DBLg8-	block_3-block_86-block_5-block_94-block_2-block_364-block_1-block_352-block_583-block_11-block_353-block_3-block_260-block_5-block_380-block_2-block_48-block_1-block_45-block_18-block_308-block_15-block_74-block_4-block_11-block_16-block_3-block_82-block_5-block_133-block_2-block_48-
NS_L1_84_Contig9871	#12	590	70	3.21919	2	2		DBLe4-	block_531-block_21-block_28-block_97-block_1-
NS_L1_84_Contig9901	#12	586	35	1.62058	1032	1032		DBLb1-	block_59-block_2-block_183-block_470-block_5-block_14-block_146-block_3-block_13-
NS_L1_84_Contig9926	#12	697	41	1.59607				DBLa0.16-	block_19-block_4-block_13-block_3-block_54-block_14-block_5-block_36-block_88-block_2-
NS_L1_84_Contig9928	#12	524	58	3.00329	9	9			block_21-block_95-block_56-block_31-block_10-
NS_L1_84_Contig9947	#12	571	61	2.89864	1	1		CIDRa2.9-	block_8-block_223-block_57-block_154-block_71-block_23-block_143-block_6-
NS_L1_84_Contig9948	#12	572	24	1.13845	2	2		NTSB-DBLa0.12-	block_54-block_3-block_13-block_4-block_19-block_17-block_20-
NS_L1_84_Contig9949	#12	576	84	3.95692	6	6		DBLd1-CIDRb5-	block_50-block_149-block_6-block_9-block_72-block_1-block_7-block_12-
NS_L1_84_Contig9972	#12	685	227	8.99157				DBLd1-	block_27-block_5-block_301-block_29-block_2-block_12-block_7-block_1-block_72-
NS_L1_84_Contig9974	#12	1629	178	2.96482	2			DBLa0.16-CIDRa3.1-	block_391-block_23-block_68-block_6-block_186-block_9-block_239-block_1-block_7-block_12-block_2-block_163-block_36-block_5-block_64-block_14-block_54-block_3-block_494-block_13-block_4-block_19-block_17-
NS_L1_84_Contig9987	#12	798	57	1.93808	1			CIDRb1-	block_8-block_1-block_24-block_10-block_491-block_31-block_56-block_33-block_21-
NS_L1_84_Contig9988	#12	696	66	2.57297	1	1		DBLe1-DBLg8-	block_45-block_18-block_49-block_551-block_308-block_15-block_74-block_4-block_11-
NS_L1_84_Contig9992	#12	776	233	8.14693	10	4		DBLb3-DBLg5-	block_609-block_5-block_86-block_3-block_16-block_11-block_4-block_139-block_15-block_612-block_18-block_61-
NS_L1_84_89166	#12	619	19	0.832843				DBLb5-DBLg10-	block_11-block_4-block_74-block_15-block_18-block_61-block_209-
NS_L1_84_89845	#12	707	127	4.87399	523	341		DBLz1-DBLe5-	block_2-block_142-block_5-block_126-block_3-block_11-block_475-block_4-block_76-block_124-block_18-
S_L7_42_28272	#13	745	251	8.37968	2	2		DBLa0.19-	block_2-block_163-block_36-block_5-block_64-block_14-block_79-block_3-block_13-block_4-block_19-
S_L7_42_28314	#13	777	262	8.38668	21	4		DBLa0.15-	block_75-block_9-block_34-block_492-block_1-block_7-block_12-block_2-block_163-block_36-block_5-
S_L7_42_28334	#13	788	314	9.91091				DBLa0.1-CIDRa3.1-	block_23-block_68-block_6-block_75-block_9-block_34-block_239-block_1-block_7-block_130-block_2-
S_L7_42_28562	#13	1011	151	3.7148	5	5		NTSB-DBLa0.16-	block_36-block_5-block_64-block_14-block_79-block_3-block_13-block_4-block_19-block_17-block_20-block_216-
S_L7_42_28578	#13	1028	148	3.58079	1	1		NTSB-DBLa0.6-	block_20-block_17-block_19-block_4-block_13-block_360-block_3-block_171-block_14-block_64-block_5-block_36-block_2-
S_L7_42_28588	#13	1043	8486	202.362	28	16		CIDRb1-	block_22-block_159-block_8-block_1-block_607-block_24-block_10-block_31-block_56-block_28-block_21-block_41-
S_L7_42_28616	#13	1069	160	3.72265				DBLd1-	block_2-block_105-block_29-block_55-block_5-block_27-block_253-block_3-block_16-block_77-block_11-block_73-block_4-block_35-block_15-
S_L7_42_28642	#13	1084	243	5.57554	454			NTSA-DBLa1.3-	block_5-block_179-block_14-block_219-block_3-block_13-block_4-block_610-block_19-block_17-block_20-
S_L7_42_28662	#13	1115	352	7.85195	1	1		CIDRb1-CIDRa3.1-	block_1-block_516-block_24-block_10-block_31-block_56-block_205-block_26-block_341-block_295-block_21-block_41-block_128-block_43-
S_L7_42_28704	#13	1205	191	3.94236	8	3		DBLb3-	block_65-block_4-block_13-block_234-block_3-block_174-block_14-block_5-block_259-block_2-block_59-block_1-block_119-block_62-
S_L7_42_28724	#13	1243	513	10.2649	21	11		DBLa2-CIDRa1.4-DBLb12-	block_65-block_52-block_141-block_10-block_121-block_1-block_8-block_57-block_23-block_150-block_6-block_9-block_70-
S_L7_42_28766	#13	1395	726	12.9441				DBLd1-CIDRb1-	block_31-block_606-block_10-block_24-block_1-block_8-block_107-block_22-block_50-block_6-block_244-block_9-block_72-block_1-block_7-block_12-block_2-
S_L7_42_28802	#13	1496	2079	34.5647	7	3		DBLb5-DBLg11-	block_1-block_62-block_61-block_18-block_15-block_139-block_4-block_11-block_232-block_3-block_86-block_5-block_94-block_2-block_48-block_1-block_425-block_45-
S_L7_42_28840	#13	1675	746	11.0773	15			DBLd1-CIDRb1-CIDRa3.1-	block_196-block_41-block_21-block_295-block_341-block_26-block_56-block_31-block_10-block_24-block_1-block_8-block_159-block_22-block_50-block_243-block_6-block_244-block_9-block_1-
S_L7_42_28850	#13	1766	544	7.66158	244	15		NTSB-DBLa0.1-CIDRa3.1-	block_20-block_17-block_19-block_4-block_13-block_3-block_54-block_14-block_5-block_36-block_163-block_2-block_12-block_7-block_1-block_34-block_9-block_75-block_6-block_68-block_23-
S_L7_42_28852	#13	1766	175	2.46466	134	5		CIDRa3.3-DBLd1-CIDRb4-	block_6-block_9-block_1-block_7-block_12-block_2-block_5-block_27-block_3-block_16-block_77-block_11-block_4-block_236-block_35-block_15-block_30-block_241-block_10-block_32-
S_L7_42_28868	#13	1842	959	12.9491	3			DBLd1-CIDRb6-	block_2-block_12-block_7-block_1-block_72-block_9-block_6-block_138-block_50-block_22-block_107-block_8-block_1-block_24-block_10-block_31-block_56-block_30-block_33-block_21-block_41-
S_L7_42_28890	#13	1930	177	2.281	95	42		DBLa1.7-CIDRa1.7-DBLb1-	block_4-block_13-block_3-block_54-block_14-block_5-block_60-block_2-block_12-block_7-block_1-block_70-block_9-block_536-block_6-block_23-block_57-block_8-block_1-block_121-block_368-block_10-block_141-block_52-
S_L7_42_28914	#13	2112	2560	30.1478	7	6		DBLa1.2-CIDRa1.7-DBLb3-	block_65-block_52-block_141-block_10-block_368-block_121-block_1-block_8-block_57-block_23-block_150-block_6-block_536-block_9-block_70-block_1-block_7-block_12-block_2-block_60-block_5-block_179-block_14-block_219-block_3-block_13-block_4-block_19-
S_L7_42_28928	#13	2293	840	9.1114				DBLd1-CIDRg8-	block_31-block_271-block_10-block_212-block_1-block_8-block_83-block_22-block_85-block_103-block_6-block_178-block_9-block_122-block_1-block_7-block_12-block_2-block_105-block_29-block_5-block_398-block_27-block_253-block_3-block_16-block_11-block_66-block_4-
S_L7_42_28950	#13	2542	6566	64.2444	26	5		DBLb6-DBLg2-DBLg4-	block_4-block_515-block_13-block_3-block_174-block_14-block_5-block_259-block_2-block_59-block_382-block_1-block_62-block_61-block_18-block_15-block_139-block_4-block_11-block_232-block_3-block_86-block_5-block_94-block_2-block_59-block_1-block_62-block_61-block_18-block_15-block_74-
S_L7_42_28952	#13	2548	6068	59.232	41	11		DBLg13-DBLz2-DBLe3-	block_21-block_294-block_78-block_45-block_1-block_48-block_2-block_142-block_5-block_3-block_160-block_4-block_76-block_124-block_18-block_93-block_62-block_1-block_99-block_2-block_92-block_275-block_5-block_14-block_3-block_13-block_4-block_318-block_18-
S_L7_42_28958	#13	2628	697	6.59656	8			DBLa0.1-CIDRa3.3-DBLd1-	block_1-block_492-block_34-block_9-block_75-block_6-block_68-block_23-block_63-block_114-block_67-block_8-block_1-block_32-block_10-block_26-block_30-block_15-block_35-block_4-block_106-block_11-block_16-block_3-block_177-block_27-block_5-block_55-block_29-block_105-block_2-
S_L7_42_28988	#13	3239	1174	9.01503				NTSB-DBLa0.3-CIDRa3.2-DBLd1-	block_20-block_17-block_19-block_4-block_13-block_616-block_3-block_204-block_14-block_5-block_2-block_12-block_7-block_1-block_9-block_75-block_245-block_6-block_68-block_23-block_104-block_63-block_110-block_67-block_8-block_441-block_1-block_299-block_32-block_10-block_26-block_30-block_15-block_35-block_4-
S_L7_42_28990	#13	3320	2269	16.9983	46	5		DBLa0.17-CIDRa3.1-DBLd1-CIDRb1-	block_8-block_22-block_50-block_6-block_9-block_1-block_7-block_12-block_2-block_498-block_29-block_55-block_5-block_561-block_27-block_3-block_16-block_109-block_11-block_81-block_4-block_34-block_35-block_15-block_26-block_49-block_10-block_560-block_32-block_1-block_8-block_67-block_110-block_63-block_104-block_23-block_68-block_6-block_75-block_9-
S_L7_42_28998	#13	3830	1824	11.845	87	9		CIDRa3.2-DBLd1-CIDRb1-	block_205-block_56-block_31-block_10-block_24-block_1-block_8-block_107-block_22-block_50-block_180-block_6-block_72-block_1-block_7-block_12-block_2-block_509-block_29-block_55-block_5-block_27-block_3-block_109-block_11-block_73-block_4-block_132-block_35-block_15-block_101-block_241-block_10-block_32-block_292-block_1-block_8-block_354-block_67-block_114-block_63-block_208-
S_L7_42_29006	#13	4058	1834	11.2408	16	3		DBLa1.2-CIDRa1.5-DBLb3-DBLg2-DBLg4-	block_4-block_74-block_15-block_18-block_61-block_62-block_1-block_59-block_2-block_519-block_5-block_82-block_3-block_11-block_4-block_286-block_15-block_18-block_481-block_61-block_62-block_1-block_59-block_2-block_259-block_5-block_14-block_3-block_13-block_444-block_4-block_53-block_65-block_52-block_121-block_1-block_8-block_57-block_23-block_150-block_6-block_449-block_9-block_1-block_7-blo…
S_L7_42_29026	#13	4622	1761	9.47631	224	2		CIDRb4-DBLe13-DBLz2-DBLe4-CIDRpam-	block_1-block_24-block_10-block_31-block_56-block_4-block_3-block_260-block_5-block_2-block_48-block_1-block_45-block_18-block_318-block_4-block_13-block_3-block_5-block_92-block_2-block_403-block_1-block_115-block_93-block_18-block_407-block_76-block_4-block_11-block_3-block_126-block_5-block_293-block_2-block_48-block_1-block_45-block_78-block_21-block_41-block_43-block_140-block_42-
S_L7_42_29034	#13	5330	2079	9.70146	144	41		DBLg10-DBLd5-CIDRb2-DBLe13-DBLz4-	block_1-block_45-block_18-block_15-block_74-block_4-block_11-block_201-block_3-block_5-block_90-block_96-block_409-block_2-block_12-block_7-block_1-block_9-block_6-block_50-block_22-block_440-block_8-block_1-block_24-block_10-block_4-block_3-block_5-block_2-block_48-block_1-block_45-block_18-block_52-block_123-block_356-block_53-block_4-block_13-block_3-block_14-block_5-block_284-block_92-block_2…
S_L7_42_34079	#13	584	2038	86.7963	36	36		DBLg4-	block_2-block_133-block_5-block_82-block_3-block_16-block_11-
S_L7_42_35357	#13	1568	2249	35.6741	10	3		DBLb5-DBLg11-	block_1-block_62-block_61-block_18-block_15-block_139-block_4-block_11-block_232-block_3-block_86-block_5-block_94-block_2-block_48-block_1-block_425-block_45-
S_L7_42_Contig1060	#13	617	55	2.21711				NTSB-DBLa0.20-	block_20-block_17-block_19-block_4-block_13-block_135-block_3-
S_L7_42_Contig1082	#13	8146	1978	6.03937	193			DBLa1.1-CIDRa1.7-DBLb3-DBLg10-DBLd5-CIDRb2-DBLe13-DBLz4-	block_19-block_4-block_13-block_3-block_219-block_14-block_179-block_5-block_60-block_2-block_12-block_7-block_1-block_70-block_9-block_6-block_150-block_23-block_57-block_8-block_1-block_121-block_10-block_141-block_52-block_65-block_53-block_4-block_584-block_13-block_3-block_174-block_14-block_5-block_2-block_59-block_1-block_62-block_61-block_18-block_15-block_139-block_4-block_11-block_3-blo…
S_L7_42_Contig1116	#13	563	481	21.2494				NTSA-DBLa1.2-	block_19-block_17-block_20-block_264-
S_L7_42_Contig1237	#13	1436	827	14.3239				DBLd1-CIDRb1-	block_127-block_31-block_606-block_10-block_24-block_1-block_8-block_107-block_22-block_50-block_6-block_244-block_9-block_72-block_1-block_7-block_12-block_2-
S_L7_42_Contig1427	#13	4116	2219	13.4089	454		PF3D7_0412400	DBLd1-CIDRb1-DBLz5-	block_51-block_47-block_46-block_203-block_25-block_44-block_38-block_40-block_117-block_39-block_84-block_164-block_42-block_25-block_43-block_41-block_21-block_33-block_254-block_56-block_31-block_10-block_24-block_1-block_8-block_159-block_22-block_50-block_138-block_6-block_9-block_1-block_7-block_12-block_2-block_105-block_29-block_55-block_5-block_3-block_16-block_273-block_11-block_81-bloc…
S_L7_42_Contig1531	#13	532	74	3.45963	7	7		NTSA-DBLa1.4-	block_20-block_17-block_19-block_4-block_13-
S_L7_42_Contig1633	#13	3150	1120	8.84336	3			DBLa0.1-CIDRa3.2-DBLd1-	block_14-block_5-block_36-block_493-block_153-block_2-block_130-block_7-block_1-block_492-block_34-block_9-block_75-block_6-block_68-block_23-block_63-block_288-block_67-block_316-block_8-block_1-block_32-block_168-block_10-block_49-block_26-block_15-block_35-block_4-block_73-block_11-block_77-block_16-block_3-block_228-block_27-block_5-block_55-block_29-block_198-block_2-
S_L7_42_Contig1712	#13	1907	360	4.69528	465	106	PfKH01_040026500 PfIT_040025100	DBLd6-CIDRb2-	block_2-block_12-block_7-block_1-block_9-block_6-block_50-block_22-block_440-block_8-block_1-block_508-block_24-block_10-block_31-block_33-block_21-block_41-block_377-block_43-
S_L7_42_Contig172	#13	714	747	26.0215				DBLd1-	block_81-block_165-block_11-block_109-block_16-block_3-block_27-block_5-block_55-
S_L7_42_Contig2025	#13	1180	89	1.87594	1	1		NTSB-DBLa0.6-	block_7-block_12-block_2-block_60-block_5-block_14-block_54-block_3-block_616-block_13-block_4-block_19-block_17-block_20-
S_L7_42_Contig2033	#13	598	45	1.87164	6	6		NTSB-DBLa0.23-	block_20-block_17-block_19-block_4-block_13-block_188-block_3-
S_L7_42_Contig2054	#13	624	79	3.14885				NTSA-DBLa1.3-	block_20-block_17-block_19-
S_L7_42_Contig2059	#13	619	75	3.01356				DBLd1-CIDRb1-	block_2-block_12-block_7-block_1-block_72-block_9-block_6-block_173-
S_L7_42_Contig2072	#13	971	107	2.74078				NTSB-DBLa0.11-	block_20-block_17-block_19-block_4-block_13-block_3-block_171-block_14-block_64-block_5-block_36-block_163-
S_L7_42_Contig2108	#13	5246	4190	19.8653	2			NTSB-DBLa0.9-CIDRa2.1-DBLd1-CIDRg5-CIDRb5-	block_20-block_17-block_19-block_4-block_13-block_102-block_3-block_54-block_14-block_64-block_5-block_36-block_2-block_12-block_7-block_1-block_70-block_9-block_6-block_23-block_57-block_116-block_8-block_1-block_32-block_10-block_506-block_30-block_15-block_35-block_4-block_11-block_77-block_16-block_3-block_437-block_177-block_27-block_433-block_5-block_55-block_105-block_2-block_12-block_7-bl…
S_L7_42_Contig2125	#13	1069	276	6.42157	2	2		NTSB-DBLa0.15-	block_20-block_17-block_19-block_4-block_13-block_188-block_3-block_14-block_64-block_5-block_36-block_2-
S_L7_42_Contig2126	#13	4444	2113	11.8259	11			NTSB-DBLa0.5-CIDRa2.6-DBLd1-CIDRb5-	block_20-block_17-block_19-block_4-block_13-block_3-block_79-block_14-block_64-block_5-block_36-block_2-block_12-block_7-block_1-block_34-block_9-block_118-block_6-block_23-block_154-block_57-block_116-block_8-block_1-block_32-block_372-block_10-block_26-block_15-block_35-block_4-block_11-block_109-block_16-block_3-block_253-block_27-block_5-block_301-block_29-block_87-block_2-block_12-block_7-bl…
S_L7_42_Contig2163	#13	862	4310	124.36	16	1		CIDRb1-	block_182-block_418-block_21-block_28-block_56-block_31-block_10-block_24-block_607-block_1-
S_L7_42_Contig2201	#13	827	62	1.86464	2			NTSB-DBLa0.18-	block_20-block_17-block_19-block_4-block_13-block_3-block_524-block_14-block_161-block_5-
S_L7_42_Contig2208	#13	1261	2113	41.6768	133			NTSB-DBLa0.4-	block_378-block_20-block_17-block_19-block_4-block_13-block_416-block_3-block_54-block_14-block_556-block_5-block_36-block_2-block_12-
S_L7_42_Contig2248	#13	3111	1778	14.2148	14			DBLa0.11-CIDRa3.3-DBLd1-CIDRb1-	block_1-block_70-block_9-block_118-block_6-block_68-block_23-block_63-block_110-block_67-block_333-block_8-block_1-block_32-block_10-block_26-block_30-block_15-block_35-block_4-block_106-block_11-block_77-block_16-block_3-block_177-block_27-block_5-block_55-block_29-block_198-block_2-block_7-block_1-block_72-block_9-block_6-block_180-
S_L7_42_Contig2257	#13	1000	940	23.3796	7	5		DBLb5-DBLg5-	block_1-block_62-block_61-block_18-block_15-block_139-block_4-block_11-block_232-block_3-block_86-block_5-
S_L7_42_Contig2285	#13	2877	2690	23.2553	7			NTSA-DBLa1.5-CIDRb4-	block_155-block_20-block_17-block_19-block_4-block_13-block_3-block_54-block_14-block_5-block_60-block_2-block_12-block_7-block_1-block_151-block_9-block_379-block_6-block_50-block_22-block_8-block_1-block_24-block_10-block_622-block_190-block_246-block_49-block_26-block_73-block_21-block_41-
S_L7_42_Contig2322	#13	1777	683	9.55968	3	2		DBLa0.11-CIDRa2.7-DBLd1-	block_12-block_7-block_1-block_70-block_9-block_118-block_6-block_438-block_23-block_57-block_116-block_8-block_1-block_32-block_10-block_30-block_15-block_35-block_4-
S_L7_42_Contig2330	#13	2891	2587	22.2566	1882	14	PF3D7_0937600 PfGB4_090005700 PfSN01_130075400 PfCD01_000010500 PfCD01_040005200 PfSN01_140087500 PfGB4_000006700 PfGB4_070037400 PfGN01_080038200 PfCD01_120058300 PfSN01_040005400	NTSA-DBLa1.3-DBLe8-	block_97-block_200-block_2-block_142-block_5-block_108-block_3-block_11-block_4-block_76-block_18-block_93-block_592-block_1-block_99-block_2-block_92-block_5-block_14-block_402-block_3-block_13-block_4-block_610-block_19-block_17-block_20-
S_L7_42_Contig2331	#13	3832	849	5.51051	10			NTSB-DBLa0.7-CIDRa3.5-DBLd1-	block_20-block_17-block_19-block_4-block_13-block_616-block_3-block_54-block_14-block_5-block_36-block_2-block_12-block_7-block_1-block_34-block_9-block_75-block_6-block_8-block_1-block_32-block_10-block_26-block_30-block_15-block_35-block_4-block_11-block_77-block_16-block_3-block_253-block_27-block_5-block_55-block_29-block_2-block_7-block_1-
S_L7_42_Contig2336	#13	7544	5277	17.3978	384	3		CIDRa1.2-DBLb11-DBLg1-DBLe1-DBLg8-DBLz1-NTSA-DBLa1.1-CIDRa1.2-	block_264-block_20-block_17-block_19-block_4-block_13-block_513-block_3-block_219-block_14-block_5-block_60-block_2-block_12-block_7-block_1-block_70-block_9-block_536-block_6-block_150-block_23-block_57-block_8-block_1-block_121-block_10-block_141-block_65-block_53-block_4-block_189-block_13-block_234-block_3-block_457-block_14-block_5-block_605-block_183-block_2-block_59-block_604-block_1-block…
S_L7_42_Contig2378	#13	8504	34640	101.313	33			NTSpam-DBLpam1-DBLpam2-CIDRpam-DBLpam3-DBLepam4-DBLepam5-DBLe10-	block_309-block_65-block_302-block_4-block_13-block_3-block_131-block_5-block_303-block_60-block_2-block_312-block_1-block_351-block_115-block_335-block_13-block_620-block_3-block_325-block_14-block_5-block_328-block_2-block_343-block_18-block_344-block_342-block_1-block_329-block_4-block_307-block_484-block_3-block_314-block_5-block_313-block_2-block_306-block_428-block_1-block_305-block_4-block…
S_L7_42_Contig3825	#13	2636	853	8.04847	3			DBLa0.9-CIDRa2.2-DBLd1-	block_3-block_16-block_11-block_165-block_81-block_4-block_35-block_15-block_30-block_26-block_32-block_1-block_8-block_57-block_23-block_438-block_6-block_413-block_9-block_70-block_1-block_7-block_12-block_2-block_36-block_5-block_64-block_14-block_446-block_3-
S_L7_42_Contig3851	#13	594	90	3.76848	3	3		NTSB-DBLa0.23-	block_13-block_4-block_19-block_17-block_20-
S_L7_42_Contig4316	#13	989	245	6.1614	4			NTSA-DBLa1.1-	block_20-block_17-block_19-block_4-block_13-block_3-block_219-
S_L7_42_Contig4481	#13	1124	117	2.58898	10	10		DBLa1.8-CIDRg3-	block_9-block_6-block_85-block_22-block_83-block_8-block_1-block_212-block_10-block_622-block_190-
S_L7_42_Contig4491	#13	1892	2795	36.7427	22	7		DBLg10-	block_21-block_355-block_18-block_45-block_1-block_579-block_48-block_2-block_5-block_86-block_3-block_16-block_11-block_4-block_74-block_15-block_56-block_31-
S_L7_42_Contig4493	#13	1520	431	7.05251				DBLe3-	block_76-block_4-block_160-block_3-block_108-block_5-block_2-block_1-block_97-
S_L7_42_Contig4999	#13	522	155	7.38535				NTSB-DBLa0.24-	block_217-block_20-block_17-block_19-
S_L7_42_Contig5171	#13	543	75	3.43535				DBLa0.1-	block_7-block_12-block_2-block_153-block_36-block_5-block_210-block_14-
S_L7_42_Contig5193	#13	950	1316	34.4542
S_L7_42_Contig5290	#13	533	178	8.30621	10	10		CIDRb1-	block_205-block_56-block_31-block_10-block_24-block_1-
S_L7_42_Contig5303	#13	676	363	13.3558					block_21-block_28-block_56-block_459-block_10-
S_L7_42_Contig5307	#13	533	133	6.20632				DBLa0.1-CIDRa3.1-	block_1-block_239-block_34-block_9-block_75-block_6-block_68-block_23-
S_L7_42_Contig5362	#13	6748	1485	5.47345	8			DBLa0.12-CIDRa2.2-DBLd3-CIDRg2-DBLz6-DBLe6-DBLa0.9-	block_524-block_14-block_161-block_5-block_36-block_2-block_12-block_7-block_1-block_70-block_9-block_118-block_6-block_438-block_23-block_57-block_8-block_1-block_32-block_10-block_506-block_30-block_15-block_35-block_4-block_357-block_106-block_11-block_273-block_3-block_27-block_5-block_90-block_96-block_2-block_12-block_7-block_1-block_151-block_9-block_518-block_6-block_477-block_85-block_22…
S_L7_42_Contig5374	#13	690	83	2.99184	3	3		DBLb3-	block_62-block_119-block_1-block_59-block_2-block_259-block_5-block_14-block_174-block_3-
S_L7_42_Contig5380	#13	714	50	1.74173	116	69		DBLd4-	block_11-block_77-block_16-block_3-block_27-block_5-block_2-block_12-block_7-
S_L7_42_Contig5382	#13	718	73	2.52876	4	4			block_73-
S_L7_42_Contig5394	#13	759	166	5.43972	3	3		CIDRg8-	block_85-block_22-block_83-block_8-block_1-block_212-block_10-block_271-
S_L7_42_Contig5396	#13	781	343	10.9233	66	65		DBLz1-	block_549-block_5-block_602-block_14-block_603-block_3-block_13-block_4-block_19-block_550-block_52-
S_L7_42_Contig5400	#13	785	309	9.79036	28	28		DBLa0.1-	block_5-block_64-block_14-block_79-block_3-block_135-block_13-block_4-block_19-block_17-block_20-
S_L7_42_Contig5408	#13	877	215	6.09746	1			DBLg11-	block_45-block_425-block_1-block_48-block_2-block_29-block_90-block_5-block_86-block_3-block_16-block_11-
S_L7_42_Contig5410	#13	902	1277	35.2123	10	10		CIDRb1-	block_21-block_33-block_56-block_31-block_10-block_24-block_607-block_1-
S_L7_42_Contig5414	#13	913	206	5.61185				DBLd1-	block_2-block_105-block_29-block_55-block_5-block_398-block_27-block_253-block_3-block_16-block_11-block_73-block_66-
S_L7_42_Contig5416	#13	934	65	1.73092	26	9		DBLa1.7-	block_4-block_13-block_3-block_54-block_14-block_5-block_60-block_2-block_12-block_7-block_1-block_70-block_9-
S_L7_42_Contig5423	#13	990	250	6.2808				DBLa0.22-CIDRa3.1-	block_1-block_9-block_75-block_245-block_6-block_68-block_23-block_104-block_63-block_110-block_67-block_8-block_441-
S_L7_42_Contig5424	#13	991	123	3.08703	5	5		NTSB-DBLa0.16-	block_216-block_20-block_17-block_19-block_4-block_13-block_3-block_79-block_14-block_64-block_5-block_36-
S_L7_42_Contig5425	#13	1008	135	3.33107	1	1		NTSB-DBLa0.6-	block_20-block_17-block_19-block_4-block_13-block_360-block_3-block_171-block_14-block_64-block_5-block_36-block_2-
S_L7_42_Contig5428	#13	1027	65	1.57417	120	84		DBLa2-CIDRa1.7-DBLb1-	block_9-block_536-block_6-block_150-block_23-block_57-block_8-block_1-block_121-block_368-block_10-block_141-block_52-
S_L7_42_Contig5429	#13	2790	1695	15.1104				DBLb5-DBLd1-	block_10-block_211-block_26-block_52-block_65-block_53-block_4-block_13-block_3-block_146-block_14-block_436-block_5-block_2-block_59-block_1-block_62-block_61-block_18-block_49-block_26-block_15-block_35-block_4-block_507-block_106-
S_L7_42_Contig5431	#13	1688	372	5.48126	13	4		CIDRb4-DBLe13-	block_45-block_1-block_48-block_2-block_5-block_260-block_3-block_4-block_56-block_31-block_10-block_24-block_1-
S_L7_42_Contig5433	#13	1095	397	9.0175				CIDRa3.2-DBLd1-	block_1-block_299-block_32-block_10-block_262-block_30-block_30-block_15-block_35-block_4-
S_L7_42_Contig5434	#13	1109	362	8.11871	1			CIDRb1-CIDRa3.1-	block_1-block_516-block_24-block_10-block_31-block_56-block_205-block_26-block_341-block_295-block_21-block_41-block_128-block_43-
S_L7_42_Contig5435	#13	2609	1007	9.59987	41	2		NTSA-DBLa1.7-CIDRa1.4-DBLb12-	block_52-block_141-block_10-block_121-block_1-block_8-block_57-block_23-block_150-block_6-block_9-block_70-block_1-block_7-block_12-block_2-block_60-block_5-block_14-block_54-block_3-block_13-block_4-block_19-block_17-block_20-
S_L7_42_Contig5437	#13	1240	224	4.493				NTSB-DBLa0.3-	block_1-block_7-block_12-block_2-block_5-block_14-block_204-block_3-block_616-block_13-block_4-block_19-block_17-block_20-block_439-
S_L7_42_Contig5438	#13	2739	374	3.39617	2			DBLa0.9-CIDRa2.1-DBLd1-	block_19-block_4-block_13-block_102-block_3-block_54-block_14-block_5-block_36-block_2-block_12-block_7-block_1-block_70-block_9-block_118-block_6-block_23-block_57-block_8-block_1-block_32-block_10-block_26-block_15-block_35-block_4-block_73-block_11-block_77-block_16-block_3-
S_L7_42_Contig5439	#13	1343	788	14.5935	60	56		DBLz4-	block_3-block_568-block_14-block_5-block_284-block_92-block_2-block_99-block_1-block_115-block_93-block_18-block_280-block_21-block_41-
S_L7_42_Contig5442	#13	1590	563	8.80686	19			NTSB-DBLa0.1-	block_20-block_17-block_19-block_4-block_13-block_233-block_3-block_54-block_14-block_161-block_5-block_36-block_88-block_2-block_12-block_7-block_1-
S_L7_42_Contig5444	#13	1655	654	9.82856	15			DBLd1-CIDRb1-CIDRa3.1-	block_1-block_9-block_244-block_6-block_243-block_50-block_22-block_159-block_8-block_1-block_24-block_10-block_31-block_56-block_26-block_341-block_295-block_21-block_41-block_196-
S_L7_42_Contig5445	#13	1746	453	6.45303	244	15		NTSB-DBLa0.1-CIDRa3.1-	block_20-block_17-block_19-block_4-block_13-block_3-block_54-block_14-block_5-block_36-block_163-block_2-block_12-block_7-block_1-block_34-block_9-block_75-block_6-block_68-block_23-
S_L7_42_Contig5446	#13	1788	679	9.44522	3			DBLd1-CIDRb6-	block_2-block_12-block_7-block_1-block_72-block_9-block_6-block_138-block_50-block_22-block_107-block_8-block_1-block_24-block_10-block_31-block_56-block_30-block_33-block_21-
S_L7_42_Contig5447	#13	2082	2277	27.2015	7	6		DBLa1.2-CIDRa1.7-DBLb3-	block_65-block_52-block_141-block_10-block_368-block_121-block_1-block_8-block_57-block_23-block_150-block_6-block_536-block_9-block_70-block_1-block_7-block_12-block_2-block_60-block_5-block_179-block_14-block_219-block_3-block_13-block_4-block_19-
S_L7_42_Contig5449	#13	2448	5798	58.9083	38	11		DBLz2-DBLe3-	block_318-block_4-block_13-block_3-block_14-block_5-block_275-block_92-block_2-block_99-block_1-block_62-block_93-block_18-block_124-block_76-block_4-block_160-block_3-block_5-block_142-block_2-block_48-block_1-block_45-block_78-block_294-block_21-
S_L7_42_Contig5450	#13	2480	5902	59.1912	20	5		DBLb6-DBLg2-DBLg4-	block_4-block_515-block_13-block_3-block_174-block_14-block_5-block_259-block_2-block_59-block_382-block_1-block_62-block_61-block_18-block_15-block_139-block_4-block_11-block_232-block_3-block_86-block_5-block_94-block_2-block_59-block_1-block_62-block_61-block_18-block_15-
S_L7_42_Contig5451	#13	2608	594	5.66485	8			DBLa0.1-CIDRa3.3-DBLd1-	block_105-block_29-block_55-block_5-block_27-block_177-block_3-block_16-block_11-block_106-block_4-block_35-block_15-block_30-block_26-block_10-block_32-block_1-block_8-block_67-block_114-block_63-block_23-block_68-block_6-block_75-block_9-block_34-block_492-block_1-
S_L7_42_Contig5452	#13	2771	961	8.62575	224	12		DBLz2-DBLe4-	block_318-block_4-block_13-block_3-block_5-block_92-block_2-block_403-block_1-block_115-block_93-block_18-block_407-block_76-block_4-block_11-block_3-block_126-block_5-block_293-block_2-block_48-block_1-block_45-block_78-block_21-block_41-block_43-
S_L7_42_Contig5453	#13	2868	31506	273.227	34	4		DBLg4-DBLd1-CIDRb1-	block_22-block_50-block_173-block_6-block_9-block_72-block_1-block_7-block_12-block_2-block_87-block_29-block_55-block_5-block_27-block_3-block_16-block_77-block_11-block_4-block_35-block_15-block_30-block_49-block_30-block_26-block_26-block_49-block_18-block_45-block_1-block_48-block_2-
S_L7_42_Contig5454	#13	2863	1208	10.4943	6			DBLd1-CIDRb1-DBLd5-	block_21-block_28-block_127-block_31-block_195-block_10-block_24-block_1-block_8-block_159-block_22-block_50-block_243-block_6-block_443-block_497-block_1-block_7-block_12-block_2-block_96-block_55-block_5-block_27-block_358-block_3-block_256-block_11-block_4-block_435-block_35-block_15-block_30-block_26-
S_L7_42_Contig5455	#13	3060	2013	16.3618	47	5		CIDRa3.1-DBLd1-CIDRb1-	block_8-block_22-block_50-block_6-block_9-block_1-block_7-block_12-block_2-block_498-block_29-block_55-block_5-block_561-block_27-block_3-block_16-block_109-block_11-block_81-block_4-block_34-block_35-block_15-block_26-block_49-block_10-block_560-block_32-block_1-block_8-block_67-block_110-block_63-block_104-block_23-block_68-
S_L7_42_Contig5456	#13	3282	1350	10.2307	85	9		CIDRa3.2-DBLd1-CIDRb1-	block_208-block_63-block_114-block_67-block_354-block_8-block_1-block_292-block_32-block_10-block_241-block_101-block_15-block_35-block_132-block_4-block_73-block_11-block_109-block_3-block_27-block_5-block_55-block_29-block_509-block_2-block_12-block_7-block_1-block_72-block_6-block_180-block_50-block_22-block_107-block_8-
S_L7_42_Contig5457	#13	3593	5502	38.0867	12			NTSA-DBLa0.18-CIDRa5-DBLb5-	block_264-block_20-block_17-block_19-block_610-block_4-block_13-block_3-block_171-block_14-block_210-block_5-block_36-block_2-block_7-block_1-block_70-block_9-block_379-block_6-block_23-block_57-block_8-block_1-block_32-block_10-block_101-block_52-block_65-block_53-block_4-block_13-block_3-block_317-block_14-block_199-block_5-block_400-block_2-block_59-
S_L7_42_Contig5458	#13	4038	1635	10.0707	16	3		DBLa1.2-CIDRa1.5-DBLb3-DBLg2-DBLg4-	block_4-block_74-block_15-block_18-block_61-block_62-block_1-block_59-block_2-block_519-block_5-block_82-block_3-block_11-block_4-block_286-block_15-block_18-block_481-block_61-block_62-block_1-block_59-block_2-block_259-block_5-block_14-block_3-block_13-block_444-block_4-block_53-block_65-block_52-block_121-block_1-block_8-block_57-block_23-block_150-block_6-block_449-block_9-block_1-block_7-blo…
S_L7_42_Contig5459	#13	4291	991	5.74414	877		PF3D7_0402800 PfIT_040007200	DBLb3-DBLe7-DBLe4-DBLe1-	block_39-block_600-block_42-block_140-block_43-block_41-block_21-block_97-block_200-block_2-block_5-block_11-block_463-block_81-block_28-block_18-block_45-block_48-block_2-block_380-block_5-block_14-block_544-block_3-block_13-block_4-block_53-block_65-
S_L7_42_Contig5817	#13	546	95	4.32754	5	5		DBLa0.17-CIDRa3.1-	block_8-block_333-block_67-block_288-block_63-block_23-block_68-block_6-
S_L7_42_Contig5941	#13	1421	444	7.77139	4	2		DBLd4-CIDRg1-	block_31-block_10-block_24-block_1-block_8-block_522-block_22-block_148-block_6-block_9-block_370-block_1-block_7-block_12-block_2-
S_L7_42_Contig5950	#13	857	179	5.19496				NTSB-DBLa0.24-	block_19-block_17-block_20-
S_L7_42_Contig6031	#13	2166	2586	29.6948	9	3		DBLa2-CIDRa1.8-DBLb12-	block_65-block_52-block_10-block_121-block_1-block_8-block_57-block_23-block_150-block_6-block_399-block_9-block_70-block_1-block_7-block_12-block_2-block_60-block_5-block_210-block_14-block_79-block_3-block_13-block_4-block_19-
S_L7_42_Contig6088	#13	508	158	7.73577	6	6		DBLb2-	block_1-block_382-block_59-block_2-block_231-block_5-block_64-block_14-block_79-
S_L7_42_Contig6096	#13	1432	430	7.46853	25	21		DBLa0.22-CIDRa3.3-DBLa0.22-	block_5-block_36-block_2-block_12-block_7-block_1-block_34-block_9-block_75-block_6-block_68-block_23-block_104-block_63-block_288-block_67-block_8-block_1-
S_L7_42_Contig6097	#13	584	2022	86.1149	36	36		DBLg4-	block_11-block_16-block_3-block_82-block_5-block_133-block_2-
S_L7_42_Contig6119	#13	551	737	33.2679	1	1		CIDRg7-	block_21-block_56-block_31-block_195-block_10-block_24-
S_L7_42_Contig6121	#13	554	85	3.81609	1	1		DBLa0.20-	block_75-block_9-block_34-block_239-block_1-block_7-block_12-
S_L7_42_Contig6136	#13	579	588	25.2586				CIDRg7-	block_24-block_10-block_31-block_56-block_127-block_28-block_21-
S_L7_42_Contig6140	#13	585	148	6.29239	5	5		DBLa1.5-CIDRb4-	block_7-block_1-block_151-block_9-block_6-block_50-block_22-
S_L7_42_Contig6151	#13	629	463	18.308				NTSB-	block_19-block_17-block_20-block_217-
S_L7_42_Contig6159	#13	651	599	22.8853	2	2		CIDRb6-CIDRa3.4-	block_8-block_1-block_24-block_10-block_31-block_56-block_205-
S_L7_42_Contig6160	#13	702	1528	54.1372				DBLb12-	block_187-block_5-block_14-block_544-block_3-block_13-block_4-block_53-block_65-
S_L7_42_Contig6172	#13	690	2722	98.1181	3	3		CIDRb1-	block_22-block_107-block_8-block_1-block_24-block_10-block_224-block_31-
S_L7_42_Contig6176	#13	1360	341	6.23628	12	1		DBLd1-CIDRg5-	block_1-block_122-block_9-block_178-block_6-block_103-block_85-block_22-block_83-block_8-block_1-block_423-block_24-block_10-block_374-block_31-block_56-block_95-block_21-
S_L7_42_Contig6178	#13	703	272	9.62329	1	1		DBLd1-CIDRb1-	block_8-block_159-block_22-block_50-block_180-block_6-block_9-block_72-block_1-block_7-
S_L7_42_Contig6180	#13	706	520	18.3193	7	5		CIDRb1-	block_21-block_221-block_56-block_31-block_224-block_10-block_24-block_1-
S_L7_42_Contig6186	#13	717	159	5.51554	4	4		NTSB-DBLa0.1-	block_20-block_17-block_19-block_4-block_13-block_3-
S_L7_42_Contig6187	#13	727	294	10.0583	5	5		DBLb5-DBLg5-	block_1-block_119-block_62-block_209-block_61-block_18-block_588-block_15-block_139-block_4-block_11-
S_L7_42_Contig6188	#13	718	209	7.23989	1			CIDRa3.3-CIDRa3.1-	block_1-block_32-block_10-block_26-block_114-block_30-block_15-
S_L7_42_Contig6191	#13	4795	4864	25.2299	10	1		DBLa0.1-CIDRa3.2-CIDRa3.2-DBLd1-CIDRb5-	block_471-block_4-block_13-block_233-block_3-block_79-block_14-block_5-block_36-block_163-block_2-block_12-block_7-block_1-block_239-block_34-block_9-block_75-block_245-block_6-block_68-block_23-block_208-block_63-block_339-block_67-block_8-block_1-block_1-block_32-block_10-block_49-block_26-block_26-block_15-block_35-block_132-block_4-block_106-block_11-block_77-block_16-block_3-block_156-block_…
S_L7_42_Contig6195	#13	3187	686	5.35367	1			DBLa0.1-CIDRa3.2-DBLd1-CIDRb6-	block_50-block_226-block_6-block_9-block_72-block_1-block_7-block_12-block_2-block_29-block_55-block_5-block_27-block_3-block_16-block_77-block_11-block_4-block_34-block_35-block_15-block_332-block_26-block_394-block_10-block_32-block_1-block_8-block_67-block_110-block_63-block_208-block_23-block_68-block_6-block_186-block_9-block_34-block_492-
S_L7_42_Contig6197	#13	740	352	11.831				CIDRg10-	block_1-block_24-block_10-block_224-block_31-block_56-block_21-
S_L7_42_Contig6199	#13	752	304	10.0546	7	3		DBLa0.1-	block_471-block_4-block_13-block_3-block_54-block_14-block_64-block_5-block_36-block_153-block_2-
S_L7_42_Contig6206	#13	768	274	8.87359	16	15		DBLz1-	block_549-block_5-block_14-block_3-block_545-block_13-block_4-block_19-block_550-block_52-
S_L7_42_Contig6211	#13	814	470	14.361	1	1		CIDRb1-	block_8-block_1-block_24-block_10-block_207-block_31-block_56-block_137-block_28-block_21-
S_L7_42_Contig6217	#13	835	437	13.0168	1	1		DBLd1-	block_4-block_106-block_11-block_16-block_3-block_5-block_55-block_29-block_87-block_2-
S_L7_42_Contig6221	#13	908	905	24.7898				DBLd1-CIDRb1-	block_1-block_72-block_9-block_6-block_243-block_50-block_22-block_159-block_8-block_1-block_24-
S_L7_42_Contig6222	#13	930	1165	31.1568	2	2		DBLd1-CIDRb1-	block_1-block_72-block_9-block_6-block_243-block_50-block_22-block_159-block_8-block_1-block_24-
S_L7_42_Contig6226	#13	998	284	7.07779	1	1		NTSB-DBLa0.16-	block_36-block_5-block_64-block_14-block_54-block_3-block_13-block_4-block_19-block_17-block_20-block_439-
S_L7_42_Contig6227	#13	1007	490	12.1025	1			DBLd1-	block_7-block_12-block_2-block_105-block_29-block_55-block_5-block_81-block_27-block_156-block_3-block_16-block_77-block_11-block_453-block_4-
S_L7_42_Contig6228	#13	2825	2272	20.0032	24		PfGN01_120046100	DBLa0.22-CIDRa3.1-DBLd1-	block_12-block_7-block_1-block_239-block_9-block_75-block_6-block_68-block_23-block_63-block_288-block_67-block_8-block_1-block_32-block_611-block_10-block_49-block_26-block_30-block_15-block_35-block_4-block_11-block_77-block_16-block_3-block_27-block_5-block_55-block_29-block_2-block_12-block_7-
S_L7_42_Contig6229	#13	1019	413	10.0806	1			CIDRb1-	block_22-block_287-block_8-block_1-block_456-block_24-block_10-block_31-block_56-block_137-block_28-block_21-
S_L7_42_Contig6230	#13	1228	1928	39.0498	8	7		CIDRb1-	block_22-block_107-block_8-block_1-block_24-block_10-block_412-block_31-block_56-block_33-block_21-
S_L7_42_Contig6232	#13	1029	436	10.5386				NTSB-DBLa0.10-	block_20-block_17-block_19-block_4-block_13-block_135-block_3-block_171-block_14-block_161-block_5-block_36-block_2-
S_L7_42_Contig6233	#13	1034	799	19.2192	7			CIDRb1-	block_50-block_22-block_159-block_8-block_1-block_607-block_24-block_10-block_31-block_56-block_30-block_28-block_21-
S_L7_42_Contig6237	#13	1050	181	4.28745				DBLa0.1-CIDRa3.1-	block_1-block_8-block_354-block_67-block_114-block_63-block_23-block_68-block_6-block_186-block_9-block_34-block_1-block_7-
S_L7_42_Contig6244	#13	1102	1052	23.7435	14	1		CIDRb1-	block_50-block_22-block_159-block_8-block_445-block_1-block_24-block_10-block_412-block_56-block_28-block_21-block_41-
S_L7_42_Contig6245	#13	1113	238	5.31853	3	3		NTSB-DBLa0.12-	block_12-block_2-block_36-block_5-block_14-block_54-block_3-block_188-block_13-block_4-block_19-block_17-block_20-
S_L7_42_Contig6248	#13	1140	361	7.87612				NTSB-DBLa0.9-	block_12-block_2-block_36-block_5-block_161-block_14-block_524-block_3-block_102-block_13-block_4-block_19-block_17-block_20-block_71-
S_L7_42_Contig6249	#13	1152	962	20.7698	5	1		CIDRb1-	block_21-block_56-block_31-block_224-block_10-block_24-block_1-block_8-block_107-block_22-block_50-block_180-block_6-
S_L7_42_Contig6251	#13	1221	1140	23.222	2	1		NTSB-DBLa0.22-	block_7-block_12-block_2-block_163-block_36-block_5-block_64-block_14-block_79-block_3-block_188-block_13-block_4-block_19-block_17-block_20-block_71-
S_L7_42_Contig6253	#13	1571	557	8.81838	6			DBLd1-CIDRb1-	block_21-block_28-block_56-block_31-block_271-block_10-block_24-block_1-block_8-block_107-block_22-block_50-block_180-block_6-block_443-block_9-block_1-
S_L7_42_Contig6254	#13	1468	820	13.8931	34	26		NTSB-DBLa0.1-	block_71-block_20-block_17-block_19-block_4-block_13-block_188-block_3-block_79-block_14-block_5-block_36-block_153-block_2-block_130-block_7-block_1-block_492-block_34-block_9-
S_L7_42_Contig6255	#13	1488	896	14.9767	19	14		DBLd5-CIDRb3-	block_459-block_10-block_24-block_1-block_8-block_22-block_50-block_149-block_6-block_9-block_151-block_1-block_7-block_12-block_2-block_87-block_29-
S_L7_42_Contig6257	#13	1504	640	10.5838	19			DBLd1-CIDRb1-DBLg5-	block_7-block_1-block_72-block_9-block_443-block_6-block_226-block_50-block_22-block_159-block_8-block_1-block_24-block_10-block_31-block_15-block_139-block_4-block_11-
S_L7_42_Contig6258	#13	1553	633	10.1378	6	1		NTSB-DBLa0.15-	block_20-block_17-block_19-block_4-block_13-block_188-block_3-block_79-block_14-block_64-block_5-block_36-block_163-block_2-block_12-block_7-block_1-block_395-block_34-block_9-block_75-
S_L7_42_Contig6259	#13	2830	5320	46.7558	2			DBLd1-CIDRb6-	block_26-block_30-block_15-block_35-block_435-block_4-block_11-block_16-block_3-block_156-block_27-block_5-block_55-block_29-block_87-block_2-block_12-block_7-block_1-block_72-block_9-block_504-block_6-block_138-block_50-block_22-block_172-block_8-block_1-block_24-block_10-block_606-block_31-block_33-block_33-block_21-
S_L7_42_Contig6260	#13	1588	818	12.8119	9	6		DBLd4-CIDRg1-CIDRa3.3-	block_21-block_137-block_56-block_31-block_10-block_24-block_1-block_8-block_384-block_22-block_85-block_6-block_178-block_9-block_1-block_7-block_12-block_2-
S_L7_42_Contig6261	#13	4981	20856	104.142	35			DBLb12-DBLg4-CIDRa3.1-DBLd1-CIDRb5-DBLz2-	block_41-block_21-block_28-block_127-block_31-block_195-block_10-block_24-block_1-block_8-block_172-block_22-block_50-block_149-block_6-block_496-block_9-block_1-block_7-block_12-block_2-block_87-block_29-block_55-block_5-block_27-block_156-block_3-block_16-block_77-block_11-block_4-block_132-block_35-block_15-block_26-block_26-block_18-block_45-block_1-block_59-block_2-block_133-block_5-block_82…
S_L7_42_Contig6262	#13	1629	955	14.5812	114	12		DBLz3-DBLe9-	block_21-block_78-block_45-block_1-block_48-block_2-block_142-block_5-block_3-block_11-block_4-block_76-block_124-block_18-block_93-block_62-block_1-block_99-block_2-
S_L7_42_Contig6263	#13	6303	2720	10.7333	14			DBLa1.2-CIDRa1.4-DBLb3-DBLb6-DBLd1-	block_13-block_3-block_54-block_14-block_5-block_60-block_2-block_12-block_7-block_1-block_9-block_6-block_150-block_23-block_57-block_8-block_1-block_121-block_368-block_10-block_141-block_52-block_65-block_53-block_4-block_584-block_13-block_3-block_174-block_14-block_5-block_297-block_2-block_59-block_1-block_62-block_255-block_61-block_18-block_52-block_17-block_53-block_4-block_13-block_3-bl…
S_L7_42_Contig6264	#13	1850	384	5.16261	1			CIDRa3.1-CIDRa3.1-DBLd1-	block_1-block_32-block_10-block_49-block_26-block_30-block_15-block_35-block_4-block_81-block_11-block_109-block_16-block_3-block_27-block_5-block_55-block_29-block_87-block_2-block_12-block_7-block_1-
S_L7_42_Contig6265	#13	1888	2238	29.4828	2			DBLa0.22-CIDRa3.1-DBLd1-	block_1-block_239-block_34-block_9-block_75-block_6-block_68-block_23-block_104-block_63-block_114-block_67-block_8-block_1-block_32-block_10-block_30-block_15-block_35-block_4-
S_L7_42_Contig6266	#13	1890	2099	27.6223				DBLd1-CIDRg7-	block_29-block_198-block_2-block_12-block_7-block_1-block_122-block_9-block_454-block_6-block_103-block_85-block_22-block_83-block_8-block_1-block_24-block_10-block_31-block_56-block_137-block_33-block_21-
S_L7_42_Contig6267	#13	1911	1689	21.9826	282	9		DBLb9-DBLg10-	block_1-block_62-block_61-block_18-block_139-block_4-block_11-block_232-block_3-block_86-block_5-block_29-block_2-block_48-block_1-block_45-block_18-block_355-block_21-block_41-
S_L7_42_Contig6268	#13	1928	981	12.6553	251	155	PfKE01_050037100	DBLz1-DBLe5-	block_549-block_92-block_2-block_99-block_1-block_115-block_93-block_18-block_124-block_76-block_4-block_475-block_11-block_3-block_126-block_5-block_142-block_2-block_200-block_466-block_97-block_274-block_474-block_21-block_41-
S_L7_42_Contig6269	#13	1952	618	7.87442	3	2		DBLb6-DBLd1-	block_4-block_35-block_15-block_26-block_28-block_28-block_18-block_61-block_62-block_430-block_1-block_59-block_2-block_183-block_5-block_14-block_174-block_3-block_13-block_4-block_53-block_65-block_52-
S_L7_42_Contig6270	#13	2083	1856	22.1615	2			DBLd1-CIDRb6-	block_11-block_77-block_16-block_3-block_437-block_177-block_27-block_5-block_55-block_448-block_29-block_87-block_2-block_12-block_7-block_1-block_72-block_9-block_6-block_138-block_50-block_22-block_287-block_8-block_1-block_24-block_10-
S_L7_42_Contig6271	#13	2043	1684	20.5014			PfCD01_030007800 PfHB3_030006200 PfIT_030007200 PfDd2_030007400 PF3D7_0302300 PfSD01_030007500 PfKH01_030007300 PfGN01_030008000 PfKH02_030007900
S_L7_42_Contig6272	#13	2076	1319	15.8026	3	1		DBLa0.15-CIDRa3.2-DBLb5-	block_6-block_68-block_23-block_104-block_63-block_110-block_67-block_333-block_8-block_441-block_1-block_32-block_10-block_101-block_52-block_65-block_53-block_4-block_290-block_13-block_234-block_3-block_146-block_14-block_5-block_2-block_59-block_1-
S_L7_42_Contig6273	#13	2184	1021	11.6274	6			DBLd1-CIDRg2-	block_27-block_5-block_55-block_29-block_105-block_2-block_12-block_7-block_1-block_9-block_6-block_85-block_22-block_176-block_8-block_1-block_24-block_10-block_606-block_31-block_127-block_28-block_137-block_21-
S_L7_42_Contig6274	#13	2091	2400	28.5474	2	2		DBLd1-CIDRb5-	block_21-block_28-block_254-block_31-block_10-block_24-block_1-block_8-block_172-block_22-block_50-block_6-block_9-block_1-block_7-block_12-block_2-block_409-block_29-block_90-block_5-block_27-
S_L7_42_Contig6275	#13	4168	19025	113.529	5			DBLa0.20-CIDRa3.1-DBLd4-CIDRg5-	block_9-block_75-block_245-block_6-block_68-block_23-block_63-block_67-block_8-block_1-block_32-block_611-block_10-block_26-block_30-block_15-block_35-block_4-block_11-block_16-block_3-block_27-block_5-block_96-block_2-block_12-block_7-block_1-block_370-block_9-block_178-block_6-block_103-block_22-block_83-block_8-block_1-block_423-block_24-block_10-block_31-block_56-block_221-block_21-block_182-
S_L7_42_Contig6276	#13	2428	1399	14.3311	1			CIDRa3.1-DBLd1-	block_72-block_1-block_7-block_12-block_2-block_498-block_29-block_55-block_5-block_82-block_3-block_16-block_77-block_11-block_73-block_4-block_35-block_15-block_26-block_49-block_10-block_168-block_32-block_1-block_8-block_67-block_110-block_63-block_208-
S_L7_42_Contig6277	#13	3378	3190	23.4877	32	1		DBLa0.19-CIDRa2.10-DBLd1-CIDRb1-	block_2-block_12-block_7-block_1-block_184-block_9-block_118-block_6-block_251-block_23-block_154-block_57-block_8-block_472-block_1-block_32-block_10-block_26-block_30-block_15-block_35-block_4-block_11-block_158-block_16-block_3-block_27-block_5-block_55-block_29-block_170-block_2-block_12-block_7-block_1-block_72-block_9-block_496-block_6-block_180-block_50-block_22-
S_L7_42_Contig6278	#13	2604	4052	38.7024				NTSB-DBLa0.5-CIDRa2.5-	block_20-block_17-block_19-block_4-block_13-block_3-block_79-block_14-block_64-block_5-block_36-block_88-block_2-block_12-block_7-block_1-block_34-block_9-block_118-block_6-block_251-block_57-block_263-block_8-block_441-block_1-block_32-block_10-block_49-
S_L7_42_Contig6279	#13	2630	1519	14.3652	39			CIDRa3.2-DBLd1-CIDRb5-	block_8-block_172-block_22-block_50-block_173-block_6-block_244-block_9-block_72-block_1-block_7-block_12-block_2-block_29-block_55-block_5-block_398-block_27-block_359-block_3-block_16-block_11-block_4-block_34-block_35-block_15-block_10-block_32-block_1-block_8-
S_L7_42_Contig6280	#13	2846	1440	12.5845				DBLa0.5-CIDRa2.6-DBLd4-	block_7-block_12-block_2-block_96-block_90-block_5-block_3-block_16-block_77-block_11-block_4-block_35-block_15-block_26-block_10-block_32-block_1-block_8-block_116-block_63-block_154-block_23-block_143-block_6-block_75-block_9-block_1-block_7-block_12-block_2-block_88-block_36-
S_L7_42_Contig6281	#13	3139	1075	8.51779	1	1		NTSB-DBLa2-CIDRa1.8-DBLb12-	block_187-block_5-block_199-block_14-block_467-block_3-block_266-block_13-block_4-block_53-block_65-block_52-block_141-block_10-block_450-block_121-block_1-block_8-block_57-block_23-block_6-block_9-block_70-block_1-block_7-block_12-block_2-block_60-block_5-block_64-block_14-block_54-block_3-block_13-block_4-block_19-block_17-block_20-block_289-
S_L7_42_Contig6282	#13	3150	3013	23.7902	199	2	PfCD01_070035800	DBLg4-DBLz3-DBLe12-	block_21-block_95-block_274-block_97-block_200-block_2-block_5-block_126-block_3-block_11-block_4-block_76-block_124-block_18-block_93-block_62-block_1-block_99-block_2-block_92-block_476-block_5-block_587-block_3-block_13-block_4-block_315-block_227-block_18-block_45-block_1-block_48-block_2-block_427-block_133-block_5-
S_L7_42_Contig6283	#13	4291	2365	13.7083	5			NTSB-DBLa0.16-CIDRa3.4-DBLd1-	block_72-block_1-block_7-block_12-block_2-block_29-block_55-block_5-block_27-block_253-block_3-block_16-block_77-block_11-block_81-block_4-block_35-block_15-block_26-block_10-block_372-block_32-block_299-block_1-block_8-block_333-block_67-block_63-block_23-block_68-block_6-block_350-block_9-block_34-block_1-block_7-block_12-block_2-block_163-block_36-block_5-block_161-block_14-block_54-block_3-bl…
S_L7_42_Contig6284	#13	3629	727	4.98262	13			DBLa0.12-CIDRa3.1-DBLd1-CIDRb1-	block_8-block_159-block_22-block_50-block_180-block_6-block_249-block_9-block_72-block_1-block_7-block_12-block_2-block_87-block_29-block_55-block_5-block_27-block_510-block_3-block_16-block_11-block_4-block_35-block_15-block_30-block_10-block_32-block_1-block_8-block_333-block_67-block_110-block_63-block_23-block_68-block_6-block_118-block_9-block_70-block_1-block_7-block_12-
S_L7_42_Contig6285	#13	4001	3031	18.842	24	7		DBLb12-DBLe2-DBLe7-DBLe3-	block_2-block_59-block_250-block_1-block_62-block_255-block_61-block_18-block_49-block_26-block_537-block_261-block_4-block_11-block_383-block_3-block_265-block_5-block_415-block_2-block_48-block_45-block_363-block_76-block_4-block_11-block_3-block_5-block_293-block_2-block_200-block_97-block_206-block_465-block_76-block_4-block_160-block_3-block_126-block_5-block_222-block_2-block_48-block_1-blo…
S_L7_42_Contig6286	#13	4036	1660	10.2298	6	3		NTSB-DBLa2-CIDRa1.1-DBLb3-DBLg4-	block_3-block_11-block_4-block_15-block_18-block_61-block_62-block_1-block_59-block_2-block_183-block_5-block_14-block_146-block_3-block_234-block_13-block_4-block_53-block_65-block_52-block_141-block_10-block_450-block_121-block_1-block_8-block_57-block_23-block_451-block_6-block_9-block_70-block_1-block_7-block_12-block_2-block_36-block_5-block_64-block_14-block_171-block_3-block_13-block_4-blo…
S_L7_42_Contig6287	#13	4135	3075	18.4961	3			DBLa0.12-CIDRa2.4-DBLd1-CIDRb1-	block_12-block_7-block_1-block_70-block_9-block_118-block_6-block_57-block_116-block_8-block_1-block_32-block_10-block_506-block_15-block_35-block_132-block_4-block_81-block_11-block_77-block_16-block_3-block_228-block_27-block_5-block_55-block_29-block_87-block_2-block_12-block_7-block_1-block_72-block_9-block_443-block_6-block_50-block_22-block_159-block_8-block_1-block_24-block_10-block_31-blo…
S_L7_42_Contig6288	#13	4191	2637	15.6496	962	11	PfCD01_060023000	DBLg10-DBLd7-CIDRb4-CIDRa6-	block_11-block_16-block_3-block_86-block_5-block_29-block_2-block_1-block_45-block_18-block_28-block_15-block_74-block_4-block_11-block_16-block_3-block_98-block_5-block_90-block_94-block_2-block_166-block_7-block_1-block_151-block_9-block_6-block_202-block_22-block_83-block_8-block_1-block_24-block_10-block_31-block_30-block_33-block_21-block_41-block_377-block_43-block_218-block_42-block_112-bl…
S_L7_42_Contig6289	#13	4210	1130	6.67585	3			DBLa0.9-CIDRa2.1-DBLd1-CIDRb1-	block_19-block_4-block_13-block_102-block_3-block_79-block_14-block_210-block_5-block_36-block_2-block_12-block_7-block_1-block_70-block_9-block_118-block_6-block_23-block_57-block_8-block_1-block_32-block_10-block_49-block_26-block_15-block_35-block_4-block_11-block_109-block_16-block_3-block_437-block_177-block_27-block_5-block_55-block_29-block_87-block_2-block_12-block_7-block_1-block_72-bloc…
S_L7_42_Contig6290	#13	4321	4980	28.6652	50			DBLa0.9-CIDRa2.2-DBLd1-CIDRb4-	block_2-block_12-block_7-block_1-block_70-block_9-block_118-block_6-block_23-block_57-block_8-block_1-block_32-block_10-block_341-block_15-block_35-block_4-block_11-block_77-block_16-block_3-block_228-block_27-block_5-block_96-block_2-block_12-block_7-block_1-block_151-block_9-block_6-block_50-block_22-block_276-block_8-block_1-block_24-block_10-block_31-block_127-block_21-
S_L7_42_Contig6291	#13	4732	3037	15.9628	8			DBLa0.5-CIDRa2.3-CIDRa3.1-DBLd1-CIDRb1-	block_36-block_88-block_2-block_12-block_7-block_1-block_184-block_9-block_75-block_6-block_438-block_23-block_154-block_57-block_8-block_1-block_32-block_10-block_157-block_332-block_15-block_35-block_4-block_453-block_11-block_158-block_16-block_3-block_253-block_27-block_5-block_369-block_29-block_170-block_2-block_12-block_7-block_1-block_9-block_6-block_180-block_50-block_22-block_159-block_…
S_L7_42_Contig6292	#13	4715	1855	9.78526	14	4		CIDRd2-DBLg2-DBLd5-CIDRb3-DBLb6-	block_59-block_2-block_259-block_5-block_14-block_174-block_3-block_13-block_4-block_53-block_65-block_331-block_10-block_24-block_1-block_8-block_22-block_50-block_6-block_9-block_1-block_7-block_12-block_2-block_29-block_90-block_5-block_98-block_3-block_77-block_11-block_4-block_585-block_15-block_18-block_61-block_129-block_1-block_59-block_2-block_96-block_5-block_86-block_3-block_16-block_1…
S_L7_42_Contig6293	#13	4720	1927	10.1543	3			NTSB-DBLa0.9-CIDRa2.7-DBLg5-DBLd1-	block_217-block_20-block_17-block_19-block_4-block_13-block_3-block_14-block_64-block_5-block_36-block_2-block_12-block_7-block_1-block_70-block_9-block_118-block_6-block_251-block_23-block_57-block_626-block_8-block_1-block_563-block_32-block_10-block_340-block_15-block_74-block_4-block_11-block_16-block_3-block_86-block_5-block_90-block_167-block_2-block_136-block_1-block_45-block_257-block_15-…
S_L7_42_Contig6294	#13	5346	12947	60.2352	108			DBLg4-DBLg11-CIDRa3.1-DBLd1-CIDRb1-	block_11-block_16-block_3-block_82-block_5-block_133-block_427-block_2-block_48-block_1-block_45-block_18-block_15-block_139-block_4-block_11-block_16-block_3-block_86-block_5-block_29-block_2-block_1-block_45-block_18-block_33-block_49-block_49-block_246-block_26-block_332-block_15-block_35-block_4-block_66-block_11-block_77-block_16-block_3-block_156-block_27-block_487-block_5-block_249-block_2…
S_L7_42_Contig6295	#13	5594	8560	38.0593	26	1		DBLb5-DBLd1-CIDRg1-DBLg3-DBLz4-	block_1-block_62-block_61-block_18-block_612-block_15-block_74-block_4-block_11-block_77-block_16-block_3-block_27-block_5-block_55-block_448-block_29-block_2-block_12-block_7-block_1-block_122-block_9-block_178-block_6-block_148-block_22-block_522-block_8-block_1-block_24-block_10-block_31-block_15-block_139-block_4-block_11-block_16-block_3-block_86-block_5-block_29-block_2-block_48-block_1-blo…
S_L7_42_Contig6296	#13	5694	12649	55.2521	31			DBLb12-DBLg2-DBLg2-CIDRa3.1-DBLd1-CIDRb6-	block_65-block_375-block_53-block_4-block_515-block_13-block_266-block_3-block_174-block_14-block_5-block_187-block_2-block_59-block_1-block_119-block_62-block_396-block_61-block_18-block_15-block_74-block_4-block_11-block_16-block_3-block_98-block_5-block_90-block_94-block_2-block_59-block_1-block_129-block_61-block_18-block_15-block_139-block_4-block_11-block_16-block_3-block_5-block_133-block_…
S_L7_42_Contig6297	#13	6285	2704	10.7007	10			NTSB-DBLa0.18-CIDRa4-DBLb5-DBLd1-CIDRb1-DBLd5-	block_20-block_17-block_19-block_4-block_13-block_3-block_171-block_14-block_64-block_5-block_36-block_2-block_7-block_1-block_9-block_6-block_23-block_63-block_8-block_1-block_32-block_10-block_101-block_52-block_65-block_53-block_4-block_278-block_13-block_3-block_146-block_14-block_5-block_2-block_59-block_1-block_119-block_62-block_61-block_18-block_28-block_15-block_35-block_4-block_11-block…
S_L7_42_Contig6298	#13	6424	5694	22.0456	141	4		NTSB-DBLa0.18-CIDRa6-DBLb4-DBLd1-CIDRb1-	block_21-block_28-block_205-block_56-block_31-block_10-block_24-block_1-block_8-block_22-block_50-block_138-block_6-block_9-block_1-block_7-block_12-block_2-block_105-block_29-block_55-block_5-block_398-block_27-block_156-block_3-block_16-block_11-block_4-block_35-block_15-block_28-block_18-block_61-block_62-block_119-block_1-block_59-block_2-block_5-block_14-block_174-block_3-block_13-block_189-…
S_L7_42_Contig6299	#13	8872	8060	22.5956	403			NTSA-DBLa1.2-CIDRa1.5-DBLg2-DBLd6-CIDRb4-DBLz3-DBLe12-	block_43-block_196-block_41-block_21-block_274-block_97-block_200-block_2-block_5-block_108-block_3-block_11-block_4-block_76-block_124-block_18-block_93-block_1-block_99-block_2-block_92-block_5-block_14-block_574-block_3-block_13-block_4-block_315-block_10-block_24-block_1-block_8-block_576-block_22-block_50-block_505-block_6-block_9-block_1-block_7-block_12-block_2-block_29-block_5-block_82-bl…
S_L7_42_Contig964	#13	2984	888	7.40157	24	3		NTSB-DBLa0.21-CIDRa2.1-DBLb2-	block_120-block_20-block_17-block_19-block_4-block_13-block_3-block_54-block_14-block_5-block_60-block_2-block_12-block_7-block_1-block_70-block_9-block_413-block_6-block_181-block_23-block_57-block_116-block_8-block_1-block_32-block_535-block_10-block_101-block_52-block_65-block_53-block_4-block_13-block_3-block_79-
S_L7_42_68396	#13	541	40	1.83896				DBLb6-	block_65-block_53-block_4-block_13-block_3-block_174-block_14-
S_L7_42_68888	#13	617	137	5.52262	26	26		DBLa0.20-CIDRa3.1-	block_75-block_6-block_68-block_23-block_63-block_288-block_67-block_8-
S_L7_42_69238	#13	695	793	28.3791				DBLd1-	block_55-block_105-block_2-block_12-block_7-block_1-block_72-block_9-block_6-
S_L7_42_69640	#13	826	111	3.34236	102	96		DBLd1-CIDRb1-	block_2-block_12-block_7-block_1-block_9-block_6-block_138-block_50-block_22-block_417-block_8-
S_L7_42_80466	#13	1030	753	18.1831	5			DBLg10-DBLd3-	block_15-block_332-block_26-block_246-block_49-block_49-block_33-block_18-block_45-block_1-block_2-
S_L7_42_80642	#13	1359	540	9.8829	1541	793	PfSN01_140087500 PfGB4_090005700 PfSN01_130075400 PfGB4_000006700 PfGB4_070037400 PF3D7_0937600 PfCD01_000010500 PfCD01_040005200 PfCD01_140086100 PfGN01_080038200 PfCD01_120058300 PF3D7_0100300 PfSN01_100005400 PfCD01_070035600	DBLa1.3-DBLe8-	block_54-block_14-block_5-block_92-block_2-block_99-block_1-block_592-block_93-block_18-block_76-block_4-block_11-block_3-block_108-block_5-
NS_L1_80_100823	#14	865	158	3.62896	7	7		CIDRg5-	block_83-block_8-block_1-block_423-block_24-block_10-block_459-block_31-block_56-block_21-
NS_L1_80_101119	#14	889	90	2.01132	15	4		DBLe10-	block_76-block_4-block_160-block_3-block_126-block_5-block_222-block_2-block_48-block_1-block_45-block_78-
NS_L1_80_101621	#14	930	155	3.31123	2	1		DBLb12-DBLg4-	block_604-block_1-block_119-block_62-block_255-block_61-block_18-block_15-block_4-block_11-block_16-block_3-
NS_L1_80_102033	#14	967	85	1.74636	4	4		DBLd5-CIDRb5-	block_1-block_9-block_6-block_50-block_22-block_172-block_8-block_1-block_24-block_10-
NS_L1_80_102333	#14	996	92	1.83514				CIDRb1-CIDRa3.1-	block_295-block_341-block_26-block_56-block_31-block_271-block_10-block_24-block_1-block_8-block_417-block_22-block_50-
NS_L1_80_102341	#14	997	123	2.45104	4	2		NTSB-DBLa0.9-	block_2-block_36-block_5-block_161-block_14-block_54-block_3-block_188-block_13-block_4-block_19-block_17-block_20-
NS_L1_80_102765	#14	1039	108	2.06514	3			NTSB-DBLa0.1-	block_20-block_17-block_19-block_4-block_13-block_233-block_3-block_54-block_14-block_64-block_5-block_36-block_2-
NS_L1_80_102915	#14	1056	1034	19.4535	1			DBLe10-	block_76-block_4-block_160-block_3-block_126-block_5-block_222-block_2-block_48-block_1-block_45-block_78-block_608-block_21-block_41-
NS_L1_80_103423	#14	1108	70	1.25516	2	1		NTSB-DBLa0.3-	block_7-block_12-block_2-block_153-block_36-block_5-block_14-block_204-block_3-block_13-block_4-block_19-block_17-block_20-
NS_L1_80_103785	#14	1155	423	7.27611	75	69	PfKH02_030005900	CIDRa1.1-DBLb12-	block_57-block_8-block_1-block_121-block_10-block_141-block_52-block_65-block_53-block_4-block_290-block_13-
NS_L1_80_104109	#14	1203	167	2.75798	1	1		DBLa0.5-CIDRa2.9-	block_13-block_135-block_3-block_79-block_14-block_5-block_36-block_153-block_2-block_12-block_7-block_1-block_34-block_9-block_75-block_6-block_143-block_23-
NS_L1_80_104167	#14	1212	430	7.04866	2			DBLd4-CIDRg1-	block_178-block_6-block_148-block_22-block_522-block_8-block_1-block_24-block_10-block_224-block_31-block_56-block_137-block_21-
NS_L1_80_104381	#14	1244	416	6.64376				DBLa0.11-	block_1-block_7-block_12-block_2-block_36-block_5-block_14-block_204-block_3-block_188-block_13-block_4-block_19-block_17-block_20-block_71-
NS_L1_80_104445	#14	1255	325	5.14494	1	1		NTSB-DBLa0.11-	block_20-block_17-block_19-block_4-block_13-block_3-block_171-block_14-block_345-block_5-block_36-block_153-block_2-block_12-block_7-block_1-
NS_L1_80_104945	#14	1335	175	2.60434	5	2		DBLa0.5-CIDRa2.6-	block_2-block_12-block_7-block_1-block_239-block_34-block_9-block_75-block_6-block_143-block_23-block_154-block_63-block_263-block_8-block_1-block_512-block_32-
NS_L1_80_105575	#14	1454	610	8.33501				CIDRa2.4-CIDRa3.1-DBLd1-	block_8-block_1-block_32-block_10-block_49-block_26-block_15-block_35-block_4-block_73-block_517-block_11-block_296-block_16-block_3-block_253-
NS_L1_80_105657	#14	1471	1159	15.6535	14			CIDRd1-DBLb3-	block_22-block_83-block_8-block_1-block_24-block_10-block_622-block_190-block_28-block_49-block_26-block_101-block_52-block_65-block_53-block_4-block_584-block_13-
NS_L1_80_106003	#14	1545	379	4.87362	1			DBLd1-CIDRg7-	block_21-block_137-block_221-block_56-block_31-block_10-block_24-block_1-block_8-block_83-block_22-block_85-block_6-block_178-block_9-block_122-block_1-
NS_L1_80_106069	#14	1561	525	6.68186	397	267	PfKH02_070015800	DBLg8-DBLz2-	block_1-block_99-block_2-block_92-block_275-block_5-block_14-block_568-block_3-block_13-block_4-block_318-block_18-block_45-block_425-block_1-block_48-block_2-
NS_L1_80_106199	#14	1593	1290	16.0885				DBLd1-CIDRb1-	block_21-block_33-block_137-block_56-block_31-block_10-block_24-block_1-block_8-block_107-block_22-block_50-block_243-block_6-block_361-block_9-block_1-
NS_L1_80_106577	#14	1688	3301	38.852	11			DBLg4-CIDRa3.1-	block_15-block_139-block_4-block_11-block_16-block_3-block_82-block_5-block_167-block_2-block_48-block_1-block_45-block_18-block_28-block_33-block_26-block_95-
NS_L1_80_106847	#14	1789	161	1.78795				DBLa0.11-CIDRa2.4-DBLd1-	block_16-block_77-block_11-block_81-block_4-block_34-block_35-block_15-block_26-block_10-block_32-block_1-block_8-block_116-block_57-block_23-block_6-block_118-block_9-block_70-
NS_L1_80_107045	#14	1850	258	2.7707	4	3		NTSB-DBLa0.3-CIDRa3.2-	block_67-block_110-block_63-block_71-block_23-block_6-block_9-block_70-block_1-block_7-block_12-block_2-block_60-block_5-block_14-block_204-block_3-block_13-block_4-block_19-block_17-block_20-
NS_L1_80_107063	#14	1854	431	4.61858				DBLd1-CIDRg1-	block_29-block_2-block_12-block_7-block_1-block_122-block_9-block_458-block_6-block_148-block_22-block_384-block_8-block_1-block_24-block_10-block_31-block_30-block_21-block_41-
NS_L1_80_107523	#14	2034	683	6.6713	4	1		DBLd1-CIDRg5-	block_10-block_24-block_1-block_8-block_83-block_22-block_85-block_6-block_9-block_122-block_1-block_7-block_12-block_2-block_105-block_29-block_5-block_27-block_156-block_3-block_16-block_158-block_11-
NS_L1_80_107841	#14	2201	687	6.20123	2			DBLd1-CIDRb1-	block_3-block_27-block_5-block_55-block_29-block_87-block_2-block_12-block_7-block_1-block_9-block_298-block_6-block_50-block_22-block_107-block_8-block_1-block_24-block_10-block_459-block_31-block_127-block_28-block_21-
NS_L1_80_107963	#14	2280	184	1.60333	113	10		CIDRa1.4-DBLb1-DBLg4-	block_133-block_5-block_3-block_16-block_11-block_4-block_74-block_18-block_61-block_62-block_1-block_59-block_2-block_183-block_5-block_199-block_14-block_457-block_3-block_234-block_13-block_4-block_53-block_65-block_52-block_141-block_10-
NS_L1_80_108023	#14	2317	262	2.24655	497	45	PF3D7_0533100	DBLg15-DBLe1-DBLg8-	block_352-block_11-block_353-block_3-block_260-block_5-block_380-block_2-block_48-block_1-block_45-block_18-block_49-block_551-block_308-block_15-block_74-block_4-block_11-block_3-block_82-block_5-block_167-block_2-
NS_L1_80_108457	#14	2709	459	3.36624	5			CIDRa3.4-DBLg2-DBLd1-	block_168-block_10-block_26-block_15-block_139-block_4-block_11-block_16-block_3-block_86-block_5-block_29-block_2-block_59-block_1-block_62-block_209-block_61-block_18-block_28-block_15-block_35-block_4-block_73-block_11-block_16-block_3-block_156-block_27-block_5-block_55-block_29-block_105-block_2-
NS_L1_80_108497	#14	2779	456	3.26	6			CIDRa3.1-DBLd1-CIDRb5-	block_366-block_33-block_56-block_31-block_195-block_10-block_24-block_1-block_8-block_172-block_22-block_50-block_149-block_6-block_9-block_1-block_7-block_12-block_2-block_619-block_29-block_55-block_5-block_27-block_3-block_16-block_77-block_11-block_4-block_35-block_15-block_26-block_49-
NS_L1_80_108779	#14	3266	1586	9.64779	8			DBLb10-DBLd1-CIDRb1-	block_2-block_59-block_1-block_523-block_62-block_61-block_18-block_49-block_15-block_35-block_4-block_11-block_77-block_16-block_3-block_228-block_27-block_5-block_55-block_29-block_2-block_12-block_7-block_1-block_72-block_9-block_6-block_138-block_50-block_22-block_107-block_8-block_1-block_24-block_10-block_491-block_31-block_56-block_137-block_33-block_21-
NS_L1_80_108799	#14	3313	770	4.61753	12			CIDRa3.3-DBLd1-CIDRb1-CIDRa3.4-	block_8-block_1-block_32-block_10-block_26-block_15-block_35-block_34-block_4-block_106-block_11-block_406-block_16-block_3-block_253-block_27-block_5-block_55-block_29-block_87-block_2-block_12-block_7-block_1-block_72-block_9-block_6-block_173-block_50-block_22-block_247-block_8-block_1-block_24-block_10-block_459-block_56-block_28-block_366-
NS_L1_80_108801	#14	3329	1687	10.068	21			CIDRa2.2-DBLd1-CIDRb1-	block_32-block_10-block_506-block_30-block_15-block_35-block_4-block_357-block_11-block_273-block_16-block_3-block_252-block_452-block_5-block_55-block_29-block_198-block_2-block_12-block_7-block_1-block_72-block_9-block_6-block_50-block_22-block_107-block_8-block_1-block_24-block_10-block_31-block_56-block_33-block_21-
NS_L1_80_108937	#14	3641	507	2.76648	4			DBLa0.19-CIDRa3.1-CIDRa4-DBLd1-CIDRb1-	block_10-block_24-block_516-block_1-block_8-block_247-block_22-block_50-block_138-block_6-block_9-block_497-block_1-block_7-block_12-block_2-block_105-block_29-block_55-block_5-block_27-block_3-block_16-block_77-block_11-block_106-block_4-block_132-block_35-block_15-block_26-block_10-block_32-block_1-block_8-block_67-block_63-block_23-block_6-block_118-block_9-block_34-block_239-
NS_L1_80_108977	#14	3784	1607	8.43734	10			DBLa0.19-CIDRa2.9-CIDRa3.1-DBLd1-CIDRg7-	block_1-block_34-block_9-block_118-block_6-block_143-block_23-block_63-block_263-block_8-block_472-block_1-block_32-block_10-block_26-block_15-block_35-block_4-block_165-block_11-block_158-block_16-block_3-block_27-block_5-block_55-block_29-block_2-block_12-block_7-block_1-block_122-block_9-block_178-block_6-block_103-block_85-block_22-block_83-block_8-block_1-block_24-block_10-
NS_L1_80_109191	#14	5383	540	1.99301	2			DBLa0.18-CIDRa5-DBLb5-DBLd1-CIDRb1-	block_7-block_1-block_70-block_9-block_455-block_6-block_23-block_57-block_8-block_1-block_32-block_10-block_101-block_52-block_65-block_53-block_4-block_290-block_13-block_3-block_146-block_14-block_5-block_400-block_2-block_59-block_1-block_119-block_62-block_61-block_18-block_26-block_15-block_35-block_4-block_11-block_16-block_3-block_177-block_27-block_5-block_479-block_29-block_170-block_2-…
NS_L1_80_109209	#14	6477	2820	8.65	61	1		DBLb3-DBLg11-DBLg9-DBLd5-CIDRb4-CIDRa3.4-	block_174-block_14-block_5-block_589-block_2-block_59-block_1-block_62-block_61-block_18-block_588-block_15-block_74-block_4-block_11-block_16-block_3-block_5-block_29-block_2-block_48-block_1-block_45-block_18-block_28-block_28-block_26-block_15-block_139-block_4-block_11-block_16-block_3-block_86-block_5-block_468-block_29-block_2-block_48-block_1-block_279-block_45-block_18-block_15-block_4-bl…
NS_L1_80_135617	#14	536	15	0.55599				DBLb5-DBLg4-	block_61-block_481-block_18-block_15-block_139-
NS_L1_80_139897	#14	647	36	1.10545				DBLa0.9-	block_5-block_36-block_2-block_12-block_7-block_1-block_239-block_9-block_118-
NS_L1_80_141155	#14	689	36	1.03806	7	7		DBLg9-	block_21-block_355-block_18-block_45-block_1-block_579-block_48-block_2-
NS_L1_80_146631	#14	1007	63	1.24294	4	1		DBLa1.6-	block_7-block_12-block_2-block_60-block_5-block_179-block_14-block_219-block_3-block_13-block_4-block_19-block_17-
NS_L1_80_222999	#14	583	80	2.72623				DBLa0.8-	block_14-block_5-block_36-block_2-block_12-block_7-block_1-
NS_L1_80_223781	#14	602	24	0.792055				DBLb4-	block_4-block_13-block_3-block_174-block_14-block_5-block_183-block_2-block_59-
NS_L1_80_226053	#14	664	21	0.628336				DBLa0.17-	block_9-block_34-block_1-
NS_L1_80_234825	#14	1184	56	0.939674	3			CIDRa3.2-DBLd1-	block_435-block_35-block_15-block_30-block_10-block_32-block_299-block_1-block_8-block_67-block_63-
NS_L1_80_240239	#14	2395	110	0.91249	28			DBLd5-CIDRb3-DBLb7-	block_16-block_3-block_5-block_90-block_29-block_2-block_12-block_7-block_1-block_9-block_6-block_149-block_50-block_22-block_8-block_1-block_24-block_10-block_331-block_52-block_65-block_53-block_4-block_278-block_13-block_3-
NS_L1_80_288128	#14	605	78	2.56142				DBLd1-	block_73-block_469-block_4-block_35-block_15-block_30-block_26-block_26-
NS_L1_80_289682	#14	643	21	0.648857	7	7		DBLd2-	block_7-block_12-block_2-block_96-block_90-block_5-block_27-block_3-block_16-
NS_L1_80_294404	#14	806	25	0.616234				DBLb10-DBLd1-	block_35-block_15-block_26-block_18-block_61-block_62-block_119-block_1-block_59-
NS_L1_80_298460	#14	525	2	0.0756853				DBLa0.18-CIDRa5-	block_67-block_63-block_23-block_6-block_9-
NS_L1_80_304510	#14	643	15	0.463469				DBLe9-	block_3-block_5-block_213-block_2-block_48-block_1-block_45-block_78-
NS_L1_80_Contig10616	#14	696	28	0.799263				DBLa0.5-	block_75-block_9-block_34-block_1-block_7-block_12-block_2-
NS_L1_80_Contig10626	#14	673	120	3.54248	9	9		DBLe4-	block_1-block_97-block_28-block_21-block_41-
NS_L1_80_Contig10793	#14	737	108	2.91137				CIDRb1-	block_1-block_24-block_10-block_31-block_56-block_333-block_95-block_21-
NS_L1_80_Contig11280	#14	527	18	0.678583	91	91		DBLd4-CIDRg2-	block_9-block_458-block_6-block_477-block_22-block_8-
NS_L1_80_Contig11372	#14	534	35	1.30217				CIDRa2.10-	block_8-block_116-block_57-block_514-block_23-block_143-block_6-
NS_L1_80_Contig11387	#14	535	41	1.52255	65	65		DBLd5-CIDRb4-	block_9-block_6-block_149-block_50-block_22-
NS_L1_80_Contig11409	#14	2093	14755	140.059	1			DBLd1-	block_6-block_30-block_504-block_9-block_72-block_1-block_7-block_12-block_2-block_87-block_29-block_5-block_27-block_3-block_16-block_11-block_66-block_4-block_34-block_35-block_15-block_26-block_426-
NS_L1_80_Contig11811	#14	2440	308	2.50785	12			CIDRa2.4-DBLd1-CIDRb1-	block_32-block_10-block_30-block_15-block_35-block_4-block_11-block_77-block_16-block_3-block_156-block_27-block_5-block_55-block_29-block_2-block_12-block_7-block_1-block_9-block_6-block_149-block_50-block_22-block_8-
NS_L1_80_Contig11814	#14	1237	396	6.36013	4	4		DBLd4-CIDRd1-	block_3-block_82-block_5-block_167-block_2-block_12-block_7-block_1-block_9-block_6-block_202-block_22-block_83-block_8-
NS_L1_80_Contig12000	#14	4857	6847	28.0074	91	2		DBLg4-DBLz2-DBLe11-DBLe3-	block_21-block_95-block_78-block_45-block_1-block_48-block_2-block_5-block_126-block_3-block_160-block_4-block_76-block_355-block_18-block_45-block_1-block_48-block_2-block_5-block_3-block_4-block_18-block_1-block_2-block_92-block_549-block_5-block_14-block_3-block_13-block_4-block_318-block_18-block_45-block_1-block_48-block_2-block_133-block_5-block_82-block_3-
NS_L1_80_Contig12154	#14	625	29	0.921847	14	14		DBLg18-	block_15-block_139-block_4-block_11-block_16-block_3-block_86-
NS_L1_80_Contig12985	#14	697	66	1.88127	7	7		DBLg18-DBLe14-	block_1-block_45-block_18-block_76-block_4-block_11-block_3-
NS_L1_80_Contig13122	#14	1390	113	1.61512	2253	1539	PfIT_120024700 PfHB3_120024400 PfKH02_120024600 PfKH02_040026550 PfKE01_120024600 PfGN01_120025550 PfGB4_120024200 PF3D7_1219400 PfSN01_120025200 PfDd2_120024000 PfGA01_120024300 PfSD01_120024500	CIDRa3.4-DBLd1-	block_10-block_15-block_35-block_4-block_11-
NS_L1_80_Contig13297	#14	738	40	1.07682	3	3		CIDRb3-CIDRa3.1-	block_341-block_26-block_31-block_10-block_24-block_1-block_8-
NS_L1_80_Contig13757	#14	970	261	5.34576	4			CIDRd1-	block_8-block_1-block_24-block_10-block_31-block_33-block_21-
NS_L1_80_Contig13861	#14	1463	284	3.85669	1			DBLd4-CIDRg1-	block_21-block_30-block_31-block_10-block_24-block_1-block_8-block_384-block_22-block_148-block_6-block_458-block_9-block_122-block_1-
NS_L1_80_Contig14317	#14	1278	44	0.68401	6	3		CIDRa5-DBLb5-	block_32-block_10-block_101-block_52-block_17-block_53-block_4-block_189-block_13-block_3-block_146-block_14-block_5-block_187-block_2-block_59-
NS_L1_80_Contig14433	#14	956	143	2.9718				DBLg3-DBLz4-	block_45-block_18-block_52-block_123-block_338-block_53-block_4-block_13-block_393-block_3-block_14-block_5-
NS_L1_80_Contig14890	#14	2196	1944	17.5875	25	13		DBLe1-DBLg8-	block_352-block_583-block_11-block_353-block_3-block_260-block_5-block_380-block_2-block_48-block_579-block_1-block_45-block_18-block_49-block_551-block_33-block_308-block_308-block_15-block_74-block_4-block_11-block_16-block_3-block_82-block_5-block_133-block_2-
NS_L1_80_Contig15336	#14	3156	550	3.46231	69			CIDRg6-DBLz6-DBLe9-	block_8-block_1-block_212-block_10-block_52-block_123-block_235-block_53-block_4-block_13-block_385-block_3-block_587-block_14-block_5-block_291-block_92-block_2-block_99-block_1-block_115-block_93-block_18-block_76-block_4-block_11-block_3-block_5-block_213-block_2-block_48-block_1-block_45-block_78-block_28-block_21-block_531-
NS_L1_80_Contig1556	#14	614	24	0.776575	289	289		DBLb4-	block_13-block_3-block_174-block_14-block_436-block_5-block_2-block_59-block_250-
NS_L1_80_Contig16506	#14	3772	399	2.10156	417		PfHB3_040024700 PfSD01_070036700 PfGN01_040026100 PfGA01_040025200	DBLb4-DBLd4-DBLd4-CIDRg1-	block_43-block_377-block_41-block_21-block_392-block_33-block_31-block_10-block_24-block_1-block_8-block_384-block_22-block_148-block_6-block_1-block_7-block_12-block_2-block_96-block_90-block_5-block_27-block_3-block_16-block_77-block_11-block_106-block_4-block_132-block_35-block_15-block_28-block_18-block_61-block_62-block_1-block_59-block_2-block_183-block_5-block_14-block_174-block_3-block_13-
NS_L1_80_Contig18136	#14	857	98	2.27188	1	1		DBLd1-CIDRb5-	block_12-block_7-block_1-block_72-block_9-block_244-block_6-block_173-block_50-block_22-block_172-block_8-
NS_L1_80_Contig18175	#14	1013	87	1.70628				DBLg14-	block_5-block_90-block_29-block_2-block_48-block_1-block_45-block_18-block_33-block_49-block_28-block_26-
NS_L1_80_Contig19258	#14	677	56	1.64339	1	1		DBLa0.13-CIDRa2.9-	block_2-block_12-block_7-block_1-block_239-block_34-block_9-block_75-block_6-block_143-
NS_L1_80_Contig19458	#14	1405	92	1.30093	4			DBLd1-	block_1-block_7-block_12-block_2-block_87-block_29-block_5-block_27-block_177-block_437-block_3-block_16-block_289-block_11-block_4-block_132-block_35-block_15-block_30-block_26-
NS_L1_80_Contig19522	#14	1039	7822	149.57	1			DBLd1-	block_1-block_7-block_12-block_2-block_105-block_29-block_249-block_5-block_27-block_3-block_16-block_109-block_11-block_81-block_4-
NS_L1_80_Contig20015	#14	1253	309	4.89946	3	1		DBLd1-	block_6-block_9-block_122-block_1-block_7-block_12-block_2-block_105-block_29-block_5-block_27-block_156-block_3-block_16-block_158-block_11-
NS_L1_80_Contig20514	#14	1765	683	7.68806				DBLd4-CIDRg4-	block_12-block_7-block_1-block_122-block_9-block_178-block_6-block_103-block_85-block_571-block_22-block_83-block_8-block_1-block_423-block_24-block_10-block_31-block_56-block_33-block_21-
NS_L1_80_Contig20624	#14	1416	112	1.57143	1			DBLd1-CIDRb6-	block_5-block_55-block_448-block_29-block_498-block_2-block_12-block_7-block_1-block_72-block_9-block_244-block_6-block_138-block_50-block_22-block_172-block_8-block_1-block_24-
NS_L1_80_Contig20792	#14	1959	269	2.72809	28			CIDRa2.1-DBLd1-	block_29-block_249-block_5-block_27-block_228-block_3-block_16-block_77-block_11-block_81-block_4-block_35-block_15-block_506-block_49-block_10-block_32-block_1-block_8-block_57-block_23-block_6-
NS_L1_80_Contig20815	#14	1092	98	1.78297	4	2		DBLd1-	block_35-block_4-block_106-block_11-block_77-block_16-block_3-block_253-block_27-block_81-block_5-block_55-block_29-block_87-block_2-block_12-
NS_L1_80_Contig20925	#14	1974	189	1.9022	6			CIDRa2.4-CIDRa2.7-DBLd1-CIDRa2.4-	block_181-block_23-block_57-block_116-block_8-block_1-block_32-block_10-block_49-block_26-block_30-block_15-block_35-block_4-block_11-block_77-block_16-block_3-block_27-block_5-block_55-block_29-block_619-block_2-
NS_L1_80_Contig20957	#14	5641	2242	7.89624	7			NTSB-DBLa0.9-CIDRa2.4-DBLg10-DBLd1-CIDRb1-	block_20-block_17-block_19-block_4-block_13-block_3-block_79-block_14-block_64-block_5-block_36-block_2-block_12-block_7-block_1-block_70-block_9-block_118-block_6-block_23-block_57-block_8-block_1-block_32-block_10-block_15-block_139-block_4-block_11-block_3-block_86-block_5-block_623-block_2-block_1-block_45-block_18-block_30-block_15-block_35-block_4-block_106-block_11-block_77-block_16-block_…
NS_L1_80_Contig21150	#14	578	34	1.16867				DBLg12-DBLd5-	block_15-block_78-block_45-block_1-block_136-block_2-block_94-
NS_L1_80_Contig21235	#14	2043	474	4.60947	7	2		DBLd7-CIDRb1-DBLg13-	block_298-block_6-block_138-block_50-block_22-block_417-block_8-block_1-block_24-block_10-block_31-block_30-block_15-block_4-block_11-block_16-block_3-block_86-block_5-block_519-block_2-block_48-block_1-block_45-
NS_L1_80_Contig21325	#14	1042	109	2.07826	3	2		CIDRa1.1-DBLb1-	block_1-block_121-block_10-block_141-block_52-block_65-block_53-block_4-block_189-block_13-block_3-block_272-
NS_L1_80_Contig21326	#14	1975	10768	108.32				DBLd1-CIDRg9-	block_5-block_55-block_29-block_498-block_2-block_12-block_7-block_1-block_122-block_9-block_178-block_6-block_148-block_22-block_8-block_1-block_24-block_10-block_254-block_33-block_21-
NS_L1_80_Contig21357	#14	1010	97	1.90806	3			NTSB-DBLa0.1-	block_20-block_17-block_19-block_4-block_13-block_233-block_3-block_54-block_14-block_64-block_5-block_36-block_2-
NS_L1_80_Contig21589	#14	534	45	1.67422	1	1		DBLg11-	block_15-block_74-block_4-block_11-block_16-block_3-block_86-
NS_L1_80_Contig21621	#14	1135	100	1.75043				DBLb5-	block_3-block_146-block_14-block_5-block_259-block_2-block_59-block_1-block_119-block_62-block_61-block_18-block_33-
NS_L1_80_Contig21795	#14	5110	637	2.47662	16		PfGB4_010019100 PfSD01_090005500	CIDRa1.1-DBLb4-DBLg14-DBLz5-DBLe4-	block_8-block_1-block_121-block_450-block_10-block_141-block_52-block_65-block_53-block_4-block_189-block_13-block_3-block_174-block_14-block_5-block_187-block_2-block_1-block_62-block_61-block_26-block_15-block_139-block_4-block_11-block_16-block_3-block_86-block_5-block_94-block_2-block_48-block_1-block_45-block_397-block_18-block_227-block_123-block_235-block_53-block_4-block_13-block_393-bloc…
NS_L1_80_Contig21910	#14	1026	28	0.54219	66	42		CIDRb3-DBLe2-	block_5-block_265-block_3-block_11-block_4-block_261-block_537-block_31-block_10-block_24-
NS_L1_80_Contig21915	#14	535	32	1.18833	3	3		DBLa2-	block_17-block_19-block_4-block_13-block_3-
NS_L1_80_Contig21960	#14	1066	213	3.96975	3	3		NTSB-DBLa0.5-	block_20-block_17-block_19-block_4-block_13-block_188-block_3-block_79-block_14-block_64-block_5-block_36-block_2-
NS_L1_80_Contig21989	#14	822	86	2.07858				DBLd1-	block_81-block_11-block_77-block_16-block_3-block_253-block_27-block_503-block_5-block_90-block_29-block_2-
NS_L1_80_Contig22161	#14	1732	180	2.06474	3			CIDRa3.1-DBLd1-	block_8-block_1-block_32-block_10-block_26-block_15-block_35-block_4-block_165-block_11-block_77-block_16-block_3-block_27-block_5-block_55-block_29-
NS_L1_80_Contig22385	#14	585	32	1.08676	6	6		NTSB-DBLa0.6-	block_20-block_17-block_19-block_4-block_13-block_102-
NS_L1_80_Contig22565	#14	748	62	1.64676				DBLb1-	block_18-block_61-block_255-block_62-block_119-block_1-block_59-block_2-block_183-block_5-
NS_L1_80_Contig22648	#14	806	90	2.21844	7	7		DBLd1-CIDRb1-	block_12-block_7-block_1-block_72-block_9-block_6-block_243-block_50-block_22-block_107-
NS_L1_80_Contig22677	#14	712	64	1.78583	2	2		DBLa0.5-CIDRa2.9-	block_23-block_143-block_6-block_118-block_9-block_184-block_239-block_1-block_7-block_12-
NS_L1_80_Contig22690	#14	1246	105	1.67422	30	22		DBLa1.1-CIDRa1.1-DBLa0.6-	block_8-block_57-block_23-block_150-block_6-block_399-block_9-block_70-block_1-block_7-block_12-block_2-block_60-block_5-block_64-block_14-block_79-
NS_L1_80_Contig22693	#14	864	1235	28.3984
NS_L1_80_Contig22700	#14	691	30	0.862549	5	5		DBLa0.16-CIDRa3.4-	block_9-block_348-block_6-block_68-block_23-block_104-block_63-block_110-block_67-block_8-
NS_L1_80_Contig22742	#14	528	97	3.64988	1	1		DBLa0.9-	block_13-block_188-block_3-block_171-block_14-block_64-block_5-block_36-block_2-
NS_L1_80_Contig22752	#14	515	35	1.35021				DBLb1-	block_14-block_317-block_3-block_13-block_4-block_53-
NS_L1_80_Contig22772	#14	556	36	1.28638				DBLa0.4-	block_60-block_2-block_12-block_7-block_1-block_184-block_9-
NS_L1_80_Contig22778	#14	515	68	2.62327	12	12		DBLpam1-	block_2-block_60-block_303-block_5-block_14-block_3-block_13-
NS_L1_80_Contig22796	#14	507	40	1.56745	25	25		CIDRa2.4-DBLg16-	block_314-block_10-block_26-block_15-block_4-
NS_L1_80_Contig22845	#14	509	17	0.663547	1	1		DBLb5-	block_61-block_209-block_62-block_119-block_1-block_514-block_59-block_2-
NS_L1_80_Contig22889	#14	586	44	1.49175	3	3		DBLb5-	block_2-block_187-block_5-block_131-block_14-block_317-block_3-block_13-block_4-
NS_L1_80_Contig22911	#14	524	23	0.872042				DBLb8-	block_10-block_125-block_1-block_604-block_59-block_2-
NS_L1_80_Contig22955	#14	547	35	1.27122	7	7		CIDRg2-	block_24-block_1-block_533-block_8-
NS_L1_80_Contig22995	#14	1165	84	1.4325	3	2		CIDRa3.3-CIDRa3.3-DBLd1-	block_32-block_615-block_10-block_26-block_30-block_15-block_35-block_34-block_4-block_81-block_11-block_388-block_16-block_3-block_27-
NS_L1_80_Contig22997	#14	555	51	1.82565				DBLd1-CIDRb5-	block_172-block_22-block_50-block_243-block_6-block_9-block_72-
NS_L1_80_Contig23034	#14	555	17	0.608551				DBLd1-	block_2-block_442-block_29-block_301-block_5-block_27-block_3-
NS_L1_80_Contig23041	#14	556	20	0.714654	12	12		DBLa0.4-	block_7-block_12-block_2-block_60-block_5-block_14-block_54-
NS_L1_80_Contig23052	#14	1041	101	1.92758	4	2		DBLg18-DBLe14-	block_5-block_3-block_4-block_76-block_18-block_45-block_1-block_48-block_2-
NS_L1_80_Contig23068	#14	692	180	5.16782				CIDRb1-CIDRa3.1-	block_1-block_24-block_10-block_31-block_56-block_205-block_26-block_341-block_295-
NS_L1_80_Contig23088	#14	574	22	0.761468				DBLa0.19-CIDRa2.5-	block_154-block_23-block_143-block_6-block_118-block_9-block_34-
NS_L1_80_Contig23108	#14	678	34	0.9963				NTSB-DBLa0.5-	block_71-block_20-block_17-block_19-block_4-block_13-block_188-block_3-block_79-
NS_L1_80_Contig23151	#14	699	637	18.1052	38	38		NTSA-DBLa1.5-	block_3-block_13-block_4-block_19-block_17-block_20-block_155-
NS_L1_80_Contig23185	#14	605	33	1.08368				DBLb7-	block_10-block_331-block_52-block_65-block_375-block_53-block_4-
NS_L1_80_Contig23209	#14	613	53	1.71774				DBLa0.1-CIDRa3.1-	block_12-block_7-block_1-block_34-block_9-block_6-block_68-
NS_L1_80_Contig23213	#14	4195	1193	5.65001	86			DBLg13-CIDRa3.1-DBLd1-CIDRb1-	block_267-block_74-block_4-block_11-block_275-block_3-block_82-block_5-block_623-block_94-block_2-block_48-block_1-block_45-block_18-block_246-block_26-block_26-block_30-block_15-block_35-block_4-block_11-block_289-block_16-block_3-block_253-block_27-block_5-block_55-block_29-block_198-block_2-block_12-block_7-block_1-block_72-block_9-block_6-block_138-block_50-block_22-block_107-block_8-block_1-…
NS_L1_80_Contig23220	#14	638	52	1.61929				DBLd1-	block_55-block_5-block_27-block_253-block_3-block_16-block_77-block_11-block_4-
NS_L1_80_Contig23256	#14	1029	419	8.08983				DBLd1-DBLd1-	block_55-block_5-block_27-block_3-block_16-block_406-block_11-block_81-block_4-block_35-block_15-block_530-block_26-block_426-
NS_L1_80_Contig23264	#14	639	81	2.5184	1	1		DBLd5-	block_1-block_7-block_12-block_2-block_90-block_5-block_27-block_3-
NS_L1_80_Contig23277	#14	643	34	1.05053				DBLa0.1-CIDRa3.1-	block_12-block_7-block_1-block_239-block_34-block_9-block_413-block_6-block_68-
NS_L1_80_Contig23327	#14	662	47	1.41052				CIDRb6-	block_1-block_24-block_10-block_31-block_56-block_30-block_137-
NS_L1_80_Contig23347	#14	719	588	16.2476	3	3		DBLa0.9-	block_19-block_4-block_13-block_188-block_3-block_171-block_14-block_64-block_5-block_36-block_2-
NS_L1_80_Contig23348	#14	674	49	1.44437	14	14		DBLa2-CIDRa1.1-	block_57-block_23-block_451-block_6-block_399-block_9-block_70-block_1-
NS_L1_80_Contig23360	#14	763	153	3.98389	7	7		DBLg9-	block_2-block_48-block_579-block_1-block_45-block_18-block_355-block_21-
NS_L1_80_Contig23406	#14	722	51	1.40338				DBLg10-DBLg11-	block_35-block_15-block_30-block_28-block_28-block_18-
NS_L1_80_Contig23421	#14	903	161	3.54225	8	8		DBLd1-CIDRb1-	block_8-block_247-block_22-block_50-block_173-block_6-block_9-block_72-block_1-block_7-block_12-block_2-
NS_L1_80_Contig23484	#14	760	45	1.17636	3	3		DBLd1-	block_198-block_29-block_369-block_448-block_55-block_5-block_185-block_3-block_16-block_77-block_11-
NS_L1_80_Contig23504	#14	753	39	1.02899				CIDRb1-	block_8-block_1-block_24-block_10-block_31-block_56-block_205-block_33-
NS_L1_80_Contig23525	#14	767	27	0.699374	1			DBLd5-	block_16-block_3-block_5-block_90-block_29-block_2-block_12-block_7-block_1-
NS_L1_80_Contig23529	#14	768	232	6.00161				DBLa0.20-CIDRa2.10-	block_1-block_472-block_8-block_223-block_57-block_154-block_23-block_181-block_6-block_75-block_9-
NS_L1_80_Contig23539	#14	775	77	1.97392	13	13		DBLa0.1-CIDRa4-	block_9-block_186-block_6-block_23-block_63-block_8-block_1-
NS_L1_80_Contig23565	#14	802	53	1.31293	1	1		DBLd4-	block_289-block_16-block_3-block_27-block_5-block_90-block_96-block_2-block_12-block_7-block_1-
NS_L1_80_Contig23571	#14	1109	2309	41.365	1			CIDRa2.4-CIDRa3.4-DBLd1-	block_8-block_30-block_1-block_32-block_10-block_26-block_15-block_35-block_34-block_4-
NS_L1_80_Contig23603	#14	835	80	1.90346	2	2		DBLa0.18-CIDRa6-	block_5-block_36-block_2-block_12-block_7-block_1-block_9-block_6-block_23-
NS_L1_80_Contig23638	#14	2067	197	1.89351	9			CIDRa2.8-DBLd1-CIDRb6-	block_10-block_26-block_30-block_15-block_35-block_4-block_81-block_11-block_109-block_16-block_3-block_437-block_177-block_27-block_398-block_5-block_90-block_96-block_2-block_12-block_7-block_1-block_72-block_9-block_6-block_138-
NS_L1_80_Contig23660	#14	1581	86	1.08071				DBLd1-CIDRb6-	block_4-block_11-block_158-block_16-block_3-block_573-block_27-block_5-block_324-block_55-block_29-block_87-block_2-block_12-block_7-block_1-block_9-block_6-block_50-block_22-
NS_L1_80_Contig23664	#14	1085	3228	59.1078	1	1		DBLg10-	block_1-block_45-block_18-block_33-block_28-block_49-block_26-block_26-block_30-block_21-block_182-block_346-
NS_L1_80_Contig23701	#14	1437	1257	17.3788				DBLd4-CIDRg4-	block_178-block_6-block_103-block_85-block_22-block_83-block_8-block_1-block_24-block_10-block_31-block_56-block_28-block_33-block_21-
NS_L1_80_Contig23713	#14	1013	77	1.51016				DBLb1-	block_53-block_4-block_515-block_13-block_266-block_3-block_146-block_14-block_5-block_183-block_2-block_59-block_1-block_119-block_62-
NS_L1_80_Contig23733	#14	1827	161	1.75077	26			DBLg12-DBLd5-CIDRb4-	block_136-block_1-block_45-block_78-block_15-block_585-block_4-block_11-block_77-block_3-block_27-block_5-block_90-block_29-block_2-block_12-block_7-block_1-block_9-block_6-block_149-block_50-block_22-
NS_L1_80_Contig23739	#14	1057	139	2.61265				CIDRa2.9-CIDRa3.1-DBLd1-	block_8-block_1-block_32-block_10-block_26-block_30-block_15-block_35-block_4-
NS_L1_80_Contig23764	#14	1091	135	2.45838	2	2		DBLa0.15-CIDRa3.2-	block_2-block_12-block_7-block_1-block_34-block_9-block_6-block_68-block_23-block_391-block_63-block_110-block_67-block_333-block_8-
NS_L1_80_Contig23765	#14	1113	7731	138.001	3	3		DBLd1-CIDRb1-	block_9-block_244-block_6-block_138-block_50-block_22-block_417-block_8-block_1-block_24-block_10-block_459-
NS_L1_80_Contig23933	#14	2762	246	1.76951	48			DBLg11-DBLd8-DBLd2-DBLd2-CIDRg6-	block_45-block_18-block_28-block_49-block_26-block_30-block_15-block_35-block_4-block_81-block_11-block_77-block_16-block_3-block_27-block_5-block_90-block_2-block_12-block_7-block_1-block_9-block_6-block_85-block_22-block_176-block_8-block_1-block_212-block_10-block_31-
NS_L1_80_Contig24286	#14	739	54	1.45174				CIDRa2.2-DBLd1-	block_32-block_10-block_26-block_30-block_15-block_35-block_4-
NS_L1_80_Contig25518	#14	829	50	1.19827	56			DBLb3-	block_14-block_544-block_3-block_13-block_4-block_53-block_65-
NS_L1_80_Contig25675	#14	1039	114	2.17987	21	18		DBLe13-	block_4-block_11-block_3-block_260-block_5-block_2-block_1-block_45-
NS_L1_80_Contig25769	#14	578	15	0.51559				DBLb12-DBLg1-	block_61-block_18-block_15-block_4-block_11-block_16-block_3-
NS_L1_80_Contig26465	#14	1970	191	1.92623	1	1		DBLd9-CIDRg3-DBLg2-	block_9-block_6-block_148-block_22-block_384-block_8-block_1-block_24-block_10-block_26-block_139-block_4-block_11-block_3-block_27-block_5-block_133-block_427-block_2-block_59-block_1-
NS_L1_80_Contig27967	#14	1067	178	3.31433				DBLz4-	block_280-block_18-block_93-block_283-block_1-block_99-block_2-block_92-block_284-block_5-block_14-block_3-
NS_L1_80_Contig28031	#14	4683	648	2.74911	77			CIDRd1-DBLb7-DBLg11-DBLe4-	block_24-block_10-block_331-block_52-block_65-block_53-block_4-block_278-block_13-block_3-block_174-block_14-block_5-block_259-block_2-block_59-block_1-block_62-block_61-block_18-block_139-block_4-block_11-block_3-block_86-block_5-block_96-block_2-block_1-block_45-block_18-block_355-block_76-block_4-block_11-block_3-block_5-block_2-block_1-block_45-block_78-block_355-block_21-block_41-block_43-bl…
NS_L1_80_Contig30134	#14	941	62	1.30901	144	137		DBLe2-DBLe8-	block_5-block_415-block_2-block_48-block_1-block_45-block_363-block_76-block_4-block_11-
NS_L1_80_Contig30993	#14	852	565	13.175				NTSB-DBLa0.5-	block_525-block_20-block_17-block_19-block_4-block_13-block_215-block_3-block_79-
NS_L1_80_Contig31141	#14	1174	157	2.65688	3	2		DBLd9-CIDRg2-	block_96-block_2-block_12-block_7-block_1-block_9-block_6-block_477-block_85-block_22-block_176-block_8-block_1-block_24-
NS_L1_80_Contig31340	#14	980	75	1.52046	2			CIDRa2.1-DBLd1-	block_32-block_10-block_506-block_26-block_15-block_35-block_4-block_81-block_11-
NS_L1_80_Contig31652	#14	583	47	1.60166				DBLa0.11-	block_7-block_12-block_2-block_36-block_5-block_161-block_14-block_54-
NS_L1_80_Contig31773	#14	783	404	10.2509	19			DBLg11-	block_48-block_2-block_167-block_5-block_98-block_3-block_16-block_11-block_4-block_74-block_15-
NS_L1_80_Contig3192	#14	1393	310	4.42131	25	5		CIDRa1.5-DBLb3-	block_174-block_3-block_13-block_189-block_4-block_53-block_65-block_10-block_121-block_1-block_8-block_57-block_23-block_150-
NS_L1_80_Contig32090	#14	1462	4088	55.5526	10			DBLg4-	block_16-block_3-block_82-block_5-block_26-block_29-block_2-block_1-block_45-block_18-block_49-block_246-block_114-block_30-
NS_L1_80_Contig32162	#14	1018	85	1.65887	271	254		DBLe6-	block_41-block_21-block_95-block_78-block_45-block_1-block_48-block_2-block_213-block_5-block_3-block_11-
NS_L1_80_Contig32245	#14	1181	70	1.17758	34			DBLa1.1-CIDRa1.4-DBLb1-	block_449-block_6-block_150-block_23-block_173-block_57-block_8-block_1-block_121-block_10-block_141-block_52-block_65-block_53-
NS_L1_80_Contig32317	#14	1817	1015	11.0982	2	1		DBLd1-CIDRb1-DBLz2-	block_2-block_12-block_7-block_1-block_72-block_9-block_6-block_173-block_50-block_22-block_8-block_1-block_24-block_10-block_31-block_127-block_33-block_28-block_21-block_41-
NS_L1_80_Contig32359	#14	898	79	1.7478	15	4			block_43-block_41-block_21-block_33-block_254-block_56-block_31-block_207-block_10-
NS_L1_80_Contig32375	#14	606	56	1.83593	40	40		DBLd1-	block_11-block_16-block_3-block_228-block_27-block_5-block_55-block_29-
NS_L1_80_Contig32406	#14	531	45	1.68368	3	3		CIDRb5-	block_26-block_205-block_31-block_412-block_10-block_24-block_1-
NS_L1_80_Contig32861	#14	3737	2276	12.1001	2			CIDRa2.4-DBLd1-CIDRb1-	block_127-block_31-block_10-block_24-block_1-block_8-block_247-block_22-block_50-block_243-block_6-block_9-block_1-block_7-block_12-block_2-block_105-block_29-block_55-block_5-block_27-block_3-block_16-block_158-block_11-block_73-block_157-block_469-block_4-block_35-block_15-block_30-block_26-block_10-block_32-block_1-block_8-block_116-block_23-
NS_L1_80_Contig32872	#14	795	105	2.62399				DBLa0.6-CIDRa3.1-	block_441-block_8-block_316-block_67-block_110-block_63-block_104-block_23-block_68-block_6-block_75-block_9-
NS_L1_80_Contig32916	#14	526	38	1.43529	24	24		DBLg11-	block_5-block_623-block_2-block_48-block_1-block_45-
NS_L1_80_Contig32929	#14	761	2583	67.4343	2	2		DBLg4-	block_16-block_3-block_82-block_5-block_94-block_2-block_48-block_1-block_45-
NS_L1_80_Contig32936	#14	1231	248	4.00253	6	1		NTSB-DBLa0.9-	block_1-block_7-block_12-block_2-block_36-block_5-block_64-block_14-block_446-block_3-block_13-block_4-block_19-block_17-block_20-block_439-
NS_L1_80_Contig32950	#14	680	51	1.49005				CIDRb1-CIDRa5-	block_366-block_127-block_31-block_10-block_24-block_1-
NS_L1_80_Contig32956	#14	519	44	1.68433				DBLd1-CIDRb1-	block_22-block_50-block_173-block_6-block_9-block_72-block_1-
NS_L1_80_Contig32971	#14	557	56	1.99744	2	2		CIDRg4-	block_24-block_10-block_31-block_56-block_28-
NS_L1_80_Contig33021	#14	618	105	3.37553				CIDRa2.4-	block_1-block_32-block_10-block_49-block_26-
NS_L1_80_Contig33024	#14	579	49	1.68135				CIDRa3.1-	block_1-block_8-block_333-block_67-block_114-block_63-block_23-block_68-block_6-
NS_L1_80_Contig33032	#14	502	48	1.89967	125	125		CIDRa3.1-	block_8-block_333-block_67-block_110-block_63-block_104-block_23-block_68-block_6-
NS_L1_80_Contig33064	#14	617	53	1.7066	6	6		DBLd1-CIDRb1-	block_1-block_9-block_298-block_6-block_243-block_50-block_22-block_417-
NS_L1_80_Contig33066	#14	2114	667	6.26847	5			NTSB-DBLa0.15-CIDRa3.2-	block_20-block_17-block_19-block_4-block_13-block_3-block_204-block_5-block_36-block_2-block_12-block_7-block_1-block_72-block_184-block_9-block_75-block_6-block_23-block_104-block_63-block_110-block_67-block_8-block_1-
NS_L1_80_Contig33072	#14	506	165	6.4785				DBLd1-CIDRb1-	block_22-block_50-block_243-block_6-block_361-block_9-
NS_L1_80_Contig33078	#14	770	34	0.877261				CIDRa2.2-DBLd1-	block_8-block_1-block_32-block_10-block_26-block_30-block_15-
NS_L1_80_Contig33089	#14	515	22	0.848704	1	1		DBLb1-	block_183-block_2-block_59-block_250-block_1-block_62-
NS_L1_80_Contig33093	#14	517	33	1.26813				DBLd1-	block_4-block_132-block_35-block_15-block_28-block_30-block_26-
NS_L1_80_Contig33101	#14	522	33	1.25598	5	5		DBLg3-	block_45-block_1-block_2-block_167-block_5-
NS_L1_80_Contig33125	#14	539	80	2.94878				DBLa0.24-	block_13-block_188-block_3-block_204-block_14-block_5-block_36-block_2-
NS_L1_80_Contig33136	#14	548	37	1.34141	6	6		DBLd1-	block_2-block_105-block_29-block_55-block_5-block_27-block_358-
NS_L1_80_Contig33150	#14	554	41	1.47033	10	10		DBLb8-DBLg4-	block_18-block_15-block_4-block_11-block_16-block_3-
NS_L1_80_Contig33156	#14	557	45	1.60509	16	16		DBLa2-	block_3-block_204-block_14-block_5-block_60-block_2-block_7-
NS_L1_80_Contig33165	#14	571	63	2.19202	5	5		DBLb4-DBLg4-	block_11-block_4-block_15-block_18-block_61-
NS_L1_80_Contig33173	#14	584	168	5.71528				NTSB-DBLa0.5-	block_71-block_20-block_17-block_19-block_4-
NS_L1_80_Contig33183	#14	573	25	0.866815				DBLd1-	block_10-block_340-block_30-block_15-block_35-block_4-
NS_L1_80_Contig33193	#14	590	43	1.44796				NTSA-DBLa1.2-	block_13-block_4-block_19-block_17-block_20-block_155-
NS_L1_80_Contig33194	#14	580	130	4.45304				CIDRg7-	block_24-block_10-block_31-block_56-block_221-block_137-block_21-
NS_L1_80_Contig33214	#14	594	95	3.17744	1	1		DBLa0.13-	block_171-block_14-block_345-block_5-block_36-block_153-block_2-block_12-block_7-block_1-
NS_L1_80_Contig33223	#14	680	307	8.96954				NTSB-DBLa0.8-	block_599-block_20-block_17-block_19-block_4-block_13-
NS_L1_80_Contig33227	#14	603	57	1.87801				NTSB-DBLa0.23-	block_20-block_17-block_19-block_4-block_13-
NS_L1_80_Contig33232	#14	619	45	1.44432	5	5		DBLg10-	block_2-block_29-block_5-block_86-block_3-block_16-block_11-block_4-
NS_L1_80_Contig33235	#14	1187	574	9.60731				DBLa0.11-	block_71-block_20-block_17-block_19-block_4-block_13-block_102-block_3-block_54-block_14-block_64-block_5-block_36-block_153-block_2-
NS_L1_80_Contig33236	#14	614	35	1.13251				DBLd1-	block_12-block_2-block_29-block_55-block_5-block_27-block_358-block_3-block_16-
NS_L1_80_Contig33237	#14	615	34	1.09836				DBLa0.11-CIDRa2.4-	block_70-block_9-block_118-block_6-block_23-block_57-block_116-block_8-
NS_L1_80_Contig33243	#14	619	42	1.34803	4	4		NTSB-DBLa0.9-	block_3-block_188-block_13-block_4-block_19-block_17-block_20-
NS_L1_80_Contig33261	#14	633	126	3.95465	12	12		DBLa0.1-CIDRa3.1-	block_23-block_68-block_6-block_75-block_9-block_34-block_1-block_7-
NS_L1_80_Contig33278	#14	646	47	1.44546	2	2		DBLa0.19-CIDRa3.1-	block_23-block_6-block_118-block_9-block_34-block_239-
NS_L1_80_Contig33290	#14	667	1008	30.0245	2	2		NTSB-DBLa0.11-	block_71-block_20-block_17-block_19-block_4-block_13-
NS_L1_80_Contig33296	#14	661	187	5.62058				CIDRg10-	block_24-block_10-block_271-block_31-block_56-block_30-block_33-block_21-
NS_L1_80_Contig33297	#14	661	73	2.19413				DBLa0.13-CIDRa2.5-	block_2-block_12-block_7-block_1-block_239-block_34-block_9-block_75-block_6-block_143-
NS_L1_80_Contig33298	#14	661	90	2.70509	5	5		DBLa0.11-CIDRa3.2-	block_67-block_110-block_63-block_71-block_23-block_6-block_9-block_70-
NS_L1_80_Contig33301	#14	728	124	3.38401				CIDRb1-	block_24-block_10-block_31-block_56-block_33-block_21-
NS_L1_80_Contig33309	#14	2277	913	7.96615	3			DBLa0.9-CIDRa2.2-DBLd1-	block_15-block_30-block_506-block_10-block_32-block_1-block_8-block_57-block_23-block_251-block_6-block_118-block_9-block_70-block_1-block_7-block_12-block_2-block_36-block_5-block_210-block_14-block_524-block_3-block_102-block_13-block_4-block_19-
NS_L1_80_Contig33320	#14	680	128	3.73974				DBLa0.19-CIDRa2.9-	block_9-block_118-block_6-block_143-block_23-block_63-block_263-block_8-block_472-
NS_L1_80_Contig33328	#14	706	47	1.32262	1	1		DBLg11-	block_16-block_3-block_82-block_5-block_90-block_29-block_2-block_48-block_1-
NS_L1_80_Contig33350	#14	719	133	3.67505	1	1		DBLd1-CIDRg7-	block_1-block_122-block_9-block_483-block_6-block_103-block_85-block_571-block_22-block_83-block_8-
NS_L1_80_Contig33356	#14	729	907	24.7184	11	10		DBLg2-DBLg6-	block_61-block_18-block_15-block_139-block_4-block_11-block_16-block_3-block_82-block_5-
NS_L1_80_Contig33359	#14	970	83	1.69999				DBLd1-	block_30-block_15-block_35-block_4-block_106-block_11-block_77-block_16-block_3-block_359-block_27-block_5-block_55-block_29-
NS_L1_80_Contig33376	#14	844	77	1.81255	19	4		CIDRa3.2-CIDRa3.1-DBLd1-	block_35-block_15-block_30-block_26-block_10-block_240-block_32-block_1-block_8-
NS_L1_80_Contig33381	#14	762	382	9.95977				CIDRg10-	block_182-block_21-block_33-block_137-block_56-block_31-block_10-block_24-
NS_L1_80_Contig33391	#14	784	201	5.09355				DBLd1-	block_16-block_296-block_11-block_517-block_73-block_4-block_35-block_15-block_157-
NS_L1_80_Contig33393	#14	786	78	1.97157	14	14		DBLd4-CIDRd1-	block_202-block_6-block_9-block_1-block_7-block_12-block_2-block_167-block_5-
NS_L1_80_Contig33399	#14	789	76	1.91372	11	10		CIDRa3.4-DBLd1-	block_168-block_10-block_49-block_26-block_30-block_15-block_35-block_34-block_4-
NS_L1_80_Contig33400	#14	847	71	1.66539	2	2		CIDRg4-	block_33-block_56-block_31-block_224-block_10-block_24-block_1-block_8-
NS_L1_80_Contig33401	#14	792	99	2.48342	5	2		CIDRb1-CIDRa3.4-	block_28-block_56-block_459-block_10-block_24-block_1-block_8-
NS_L1_80_Contig33418	#14	819	31	0.752001	55	29		DBLa0.16-CIDRa3.4-	block_12-block_7-block_1-block_239-block_34-block_9-block_348-block_6-block_68-block_23-block_63-block_339-
NS_L1_80_Contig33428	#14	840	382	9.03493	16			NTSB-DBLa2-	block_20-block_17-block_19-block_4-block_13-block_3-block_54-
NS_L1_80_Contig33429	#14	850	163	3.80986	4	4		DBLd1-CIDRb4-	block_2-block_12-block_7-block_1-block_9-block_6-block_50-block_22-block_287-block_8-
NS_L1_80_Contig33432	#14	864	136	3.12727	14	14		CIDRb6-CIDRb7-	block_1-block_24-block_10-block_31-block_56-block_28-block_21-
NS_L1_80_Contig33433	#14	842	106	2.50112	7	7		CIDRg5-	block_21-block_56-block_31-block_459-block_10-block_24-block_423-block_1-block_8-
NS_L1_80_Contig33434	#14	852	45	1.04933				DBLa0.12-CIDRa2.8-	block_32-block_1-block_8-block_626-block_57-block_23-block_438-block_6-block_118-block_9-block_70-
NS_L1_80_Contig33439	#14	853	44	1.02481	2	1		DBLa0.3-	block_2-block_153-block_36-block_5-block_14-block_204-block_3-block_13-block_4-block_19-block_17-
NS_L1_80_Contig33443	#14	860	31	0.71615	2			DBLa0.1-	block_2-block_153-block_36-block_5-block_210-block_14-block_3-
NS_L1_80_Contig33453	#14	925	97	2.08339				CIDRa6-DBLb4-	block_13-block_4-block_53-block_65-block_101-block_10-block_32-block_1-
NS_L1_80_Contig33469	#14	955	31	0.64491				CIDRa3.2-CIDRa3.1-DBLd1-	block_435-block_35-block_15-block_30-block_10-block_32-block_299-block_1-block_8-
NS_L1_80_Contig33471	#14	928	1150	24.6201				DBLg10-	block_1-block_45-block_18-block_28-block_33-block_49-block_26-block_26-block_95-
NS_L1_80_Contig33474	#14	938	32	0.677779	4	4		DBLb5-	block_2-block_187-block_5-block_14-block_146-block_3-block_13-block_189-block_4-block_53-block_17-block_52-block_101-
NS_L1_80_Contig33476	#14	949	150	3.14026	1			DBLd4-CIDRg7-	block_1-block_122-block_9-block_178-block_6-block_85-block_22-block_83-block_8-block_1-block_24-
NS_L1_80_Contig33483	#14	959	50	1.03584	1			CIDRa2.2-DBLd1-	block_252-block_3-block_16-block_273-block_11-block_81-block_4-block_435-block_35-block_15-block_593-block_26-block_49-block_10-
NS_L1_80_Contig33489	#14	973	106	2.16438	4	2		CIDRb4-	block_21-block_56-block_31-block_10-block_24-block_1-block_8-
NS_L1_80_Contig33493	#14	1104	77	1.38568	28	13		DBLg2-DBLg3-	block_5-block_609-block_94-block_2-block_59-block_1-block_129-block_61-block_18-block_169-block_15-block_74-block_4-block_11-block_16-block_3-
NS_L1_80_Contig33509	#14	1095	941	17.0733				DBLb12-DBLg4-	block_3-block_16-block_11-block_4-block_15-block_588-block_18-block_61-block_255-block_62-block_1-block_604-block_59-block_2-block_297-block_5-
NS_L1_80_Contig33516	#14	1059	55	1.03183				CIDRa2.4-DBLd1-	block_16-block_77-block_11-block_81-block_4-block_34-block_35-block_15-block_26-block_10-block_32-
NS_L1_80_Contig33524	#14	1087	76	1.38907				CIDRa3.1-CIDRa3.1-DBLd1-	block_67-block_333-block_8-block_1-block_32-block_611-block_10-block_49-block_26-block_30-block_15-block_35-block_4-
NS_L1_80_Contig33535	#14	3682	1019	5.49834				DBLa0.15-CIDRa3.2-DBLd1-CIDRb1-	block_8-block_22-block_50-block_505-block_6-block_9-block_72-block_1-block_7-block_12-block_2-block_29-block_55-block_5-block_27-block_3-block_16-block_11-block_469-block_4-block_35-block_15-block_26-block_10-block_32-block_1-block_8-block_67-block_63-block_71-block_23-block_6-block_118-block_9-block_1-block_7-block_12-block_2-
NS_L1_80_Contig33536	#14	1748	189	2.14813	8			DBLg2-DBLg5-	block_11-block_16-block_3-block_86-block_5-block_94-block_2-block_48-block_1-block_129-block_61-block_18-block_33-block_49-block_246-block_30-block_15-block_74-block_4-block_11-block_16-block_3-block_86-
NS_L1_80_Contig33538	#14	2932	2164	14.6634	10			DBLa0.1-CIDRa3.1-DBLd1-	block_2-block_12-block_7-block_1-block_34-block_9-block_75-block_245-block_6-block_68-block_23-block_63-block_114-block_67-block_354-block_8-block_1-block_32-block_595-block_10-block_26-block_30-block_15-block_35-block_34-block_4-block_81-block_11-block_158-block_16-block_3-block_156-block_27-block_5-block_29-block_87-block_2-
NS_L1_80_Contig33541	#14	2128	1035	9.66295	9	3		DBLa2-CIDRa1.1-DBLb12-	block_13-block_290-block_4-block_53-block_65-block_52-block_141-block_10-block_121-block_1-block_8-block_57-block_23-block_451-block_6-block_9-block_70-block_1-block_7-block_12-block_2-block_5-block_210-block_14-block_54-
NS_L1_80_Contig33545	#14	1162	319	5.45413	2			DBLd4-CIDRg1-	block_6-block_148-block_22-block_522-block_8-block_1-block_24-block_10-block_224-block_31-block_56-block_137-block_21-
NS_L1_80_Contig33546	#14	1166	380	6.47479	13	7		DBLg9-DBLd4-	block_90-block_5-block_27-block_3-block_16-block_77-block_11-block_4-block_35-block_15-block_18-block_45-block_279-block_1-block_48-block_2-
NS_L1_80_Contig33547	#14	1167	136	2.31531	1	1		DBLa0.5-CIDRa2.9-	block_13-block_135-block_3-block_79-block_14-block_5-block_36-block_153-block_2-block_12-block_7-block_1-block_34-block_9-block_75-block_6-block_143-
NS_L1_80_Contig33549	#14	1178	380	6.40884				DBLd1-	block_1-block_7-block_12-block_2-block_442-block_29-block_55-block_5-block_27-block_3-block_16-block_273-block_11-block_165-block_4-block_34-block_35-
NS_L1_80_Contig33559	#14	1221	107	1.74104	3	3		NTSB-DBLa0.3-	block_70-block_1-block_7-block_12-block_2-block_60-block_5-block_14-block_204-block_3-block_13-block_4-block_19-block_17-block_20-
NS_L1_80_Contig33563	#14	1244	138	2.20394	4			CIDRa2.6-DBLd1-	block_77-block_11-block_4-block_132-block_35-block_15-block_332-block_26-block_49-block_10-block_32-block_1-block_8-block_116-
NS_L1_80_Contig33568	#14	2133	306	2.85017	2	2		NTSB-DBLa0.15-CIDRa3.2-	block_71-block_20-block_17-block_19-block_4-block_13-block_135-block_3-block_54-block_14-block_5-block_36-block_163-block_2-block_12-block_7-block_1-block_34-block_9-block_6-block_68-block_23-block_391-block_63-block_110-block_67-block_333-block_8-
NS_L1_80_Contig33576	#14	1300	419	6.40341	2	1		DBLd1-CIDRb1-CIDRa3.1-	block_6-block_50-block_22-block_107-block_8-block_1-block_24-block_10-block_459-block_31-block_127-block_28-block_21-
NS_L1_80_Contig33579	#14	1315	160	2.41732	5	2		DBLa0.5-CIDRa2.6-	block_32-block_512-block_1-block_8-block_263-block_63-block_154-block_23-block_143-block_6-block_75-block_9-block_34-block_239-block_1-block_7-block_12-block_2-
NS_L1_80_Contig33585	#14	1361	305	4.45228	17	5		DBLe3-	block_206-block_76-block_4-block_160-block_3-block_126-block_5-block_222-block_2-block_48-block_1-block_414-block_78-block_28-block_294-block_21-block_41-
NS_L1_80_Contig33598	#14	1436	327	4.52412	5	4		DBLd1-CIDRb6-	block_1-block_8-block_172-block_22-block_50-block_243-block_6-block_9-block_72-block_1-block_7-block_12-block_2-block_29-block_55-block_5-block_27-block_228-block_3-block_16-
NS_L1_80_Contig33602	#14	1455	1187	16.208	14			CIDRd1-DBLb3-	block_13-block_584-block_4-block_53-block_65-block_52-block_101-block_26-block_49-block_28-block_190-block_622-block_10-block_24-block_1-block_8-block_83-block_22-
NS_L1_80_Contig33616	#14	1523	159	2.07414	2			DBLd1-CIDRb6-	block_8-block_172-block_22-block_50-block_6-block_9-block_1-block_7-block_12-block_2-block_409-block_29-block_55-block_5-block_82-block_3-block_16-block_77-block_11-
NS_L1_80_Contig33619	#14	2465	1076	8.67234	397	227	PfKH02_070015800	DBLg8-DBLz2-DBLe5-	block_2-block_48-block_1-block_425-block_45-block_18-block_318-block_4-block_13-block_3-block_568-block_14-block_5-block_275-block_92-block_2-block_99-block_1-block_62-block_93-block_18-block_124-block_76-block_4-block_3-block_5-block_142-block_2-block_200-
NS_L1_80_Contig33621	#14	1546	243	3.12275	2	2		DBLd7-CIDRb5-	block_2-block_12-block_7-block_1-block_9-block_6-block_149-block_50-block_22-block_172-block_8-block_1-block_24-block_10-block_195-block_31-block_56-block_33-
NS_L1_80_Contig33625	#14	1559	349	4.44754	18	2		DBLg10-DBLg14-	block_29-block_468-block_5-block_86-block_3-block_16-block_11-block_4-block_139-block_15-block_26-block_28-block_28-block_18-block_45-block_1-block_48-block_2-
NS_L1_80_Contig33627	#14	1577	341	4.29599	33	15		DBLb3-DBLg11-	block_174-block_14-block_5-block_589-block_2-block_59-block_250-block_1-block_62-block_61-block_18-block_588-block_15-block_74-block_4-block_11-block_16-block_3-block_5-block_29-block_2-
NS_L1_80_Contig33628	#14	1597	2132	26.523	5			DBLepam5-DBLe10-	block_21-block_608-block_78-block_45-block_1-block_48-block_2-block_222-block_5-block_126-block_3-block_160-block_4-block_76-block_206-block_97-block_1-block_371-block_2-block_142-
NS_L1_80_Contig33646	#14	1772	353	3.95778	3			CIDRa3.3-CIDRa3.1-DBLd1-	block_8-block_1-block_32-block_10-block_26-block_15-block_35-block_34-block_4-block_106-block_11-block_406-block_16-block_3-block_253-block_27-block_5-block_55-block_29-block_87-block_2-
NS_L1_80_Contig33675	#14	2150	987	9.12052	17	9		DBLd5-CIDRb4-CIDRa3.4-	block_41-block_21-block_295-block_341-block_26-block_205-block_30-block_10-block_24-block_1-block_8-block_22-block_50-block_6-block_9-block_1-block_7-block_166-block_2-block_29-block_90-
NS_L1_80_Contig33676	#14	2275	155	1.3536	1			DBLa0.18-CIDRa5-DBLb5-	block_59-block_2-block_400-block_5-block_14-block_146-block_3-block_13-block_290-block_4-block_53-block_65-block_52-block_101-block_10-block_32-block_1-block_8-block_57-block_23-block_6-block_455-block_9-block_70-block_1-block_7-block_12-block_2-
NS_L1_80_Contig33678	#14	2315	281	2.41155	3			CIDRa2.4-DBLd1-CIDRb6-	block_50-block_138-block_6-block_443-block_9-block_497-block_1-block_7-block_12-block_2-block_105-block_29-block_55-block_5-block_27-block_3-block_16-block_77-block_11-block_106-block_4-block_132-block_35-block_15-block_26-block_10-block_32-block_1-
NS_L1_80_Contig33691	#14	2606	1177	8.97311	20			DBLd1-CIDRb1-	block_21-block_33-block_56-block_31-block_10-block_24-block_1-block_8-block_107-block_22-block_50-block_6-block_9-block_72-block_1-block_7-block_12-block_2-block_198-block_29-block_55-block_5-block_452-block_252-block_3-block_16-block_273-block_11-block_357-block_4-
NS_L1_80_Contig33693	#14	2689	448	3.31	5			CIDRa3.4-DBLg2-DBLd1-	block_168-block_10-block_26-block_15-block_139-block_4-block_11-block_16-block_3-block_86-block_5-block_29-block_2-block_59-block_1-block_62-block_209-block_61-block_18-block_28-block_15-block_35-block_4-block_73-block_11-block_16-block_3-block_156-block_27-block_5-block_55-block_29-block_105-block_2-
NS_L1_80_Contig33695	#14	2799	2321	16.4745	4			DBLa0.15-CIDRa3.2-CIDRa3.1-DBLd1-	block_4-block_35-block_15-block_30-block_26-block_10-block_32-block_292-block_1-block_8-block_67-block_63-block_23-block_68-block_6-block_75-block_9-block_34-block_239-block_1-block_7-block_12-block_2-block_153-block_36-block_5-block_210-block_14-block_79-block_3-block_188-block_13-block_4-block_19-
NS_L1_80_Contig33701	#14	2929	1097	7.44094	5			CIDRa2.10-CIDRa3.1-DBLd1-CIDRg7-	block_10-block_24-block_1-block_8-block_83-block_22-block_85-block_103-block_6-block_178-block_9-block_122-block_1-block_7-block_12-block_2-block_29-block_55-block_5-block_27-block_3-block_16-block_158-block_11-block_165-block_4-block_35-block_15-block_30-block_26-block_10-block_32-block_1-block_472-
NS_L1_80_Contig33702	#14	2965	1210	8.10777				DBLa0.1-CIDRa3.2-DBLd1-	block_2-block_130-block_7-block_1-block_395-block_34-block_9-block_75-block_245-block_6-block_68-block_23-block_63-block_110-block_67-block_8-block_1-block_32-block_10-block_26-block_30-block_15-block_35-block_4-block_469-block_11-block_77-block_16-block_3-block_156-block_27-block_5-block_55-block_29-block_2-
NS_L1_80_Contig33705	#14	3074	4950	31.9921	59	1		DBLa1.5-CIDRb4-DBLb6-DBLb6-	block_2-block_12-block_7-block_1-block_151-block_9-block_379-block_6-block_50-block_22-block_440-block_8-block_1-block_24-block_10-block_101-block_434-block_389-block_28-block_52-block_65-block_53-block_4-block_13-block_3-block_174-block_14-block_5-block_625-block_2-block_59-block_1-block_62-block_61-block_18-block_557-
NS_L1_80_Contig33711	#14	3258	348	2.12212	1			DBLb10-DBLd1-CIDRb1-	block_59-block_1-block_119-block_62-block_61-block_18-block_26-block_15-block_35-block_4-block_11-block_16-block_3-block_177-block_27-block_5-block_479-block_29-block_170-block_2-block_12-block_7-block_1-block_72-block_9-block_6-block_138-block_50-block_22-block_555-block_8-block_1-block_24-block_10-block_31-block_56-block_33-block_21-
NS_L1_80_Contig33718	#14	6561	3202	9.69599	10			NTSB-DBLa0.21-CIDRa2.1-DBLb2-DBLd1-CIDRb1-	block_21-block_33-block_137-block_56-block_31-block_491-block_10-block_24-block_1-block_8-block_107-block_22-block_50-block_138-block_6-block_9-block_72-block_1-block_7-block_12-block_2-block_29-block_55-block_5-block_228-block_3-block_16-block_77-block_11-block_4-block_35-block_15-block_49-block_18-block_61-block_62-block_523-block_1-block_59-block_2-block_231-block_5-block_199-block_14-block_14…
NS_L1_80_Contig33721	#14	4499	805	3.55485	31			DBLd5-CIDRb3-DBLb7-DBLg9-CIDRa3.1-	block_3-block_5-block_90-block_29-block_2-block_12-block_7-block_1-block_9-block_6-block_50-block_22-block_8-block_1-block_24-block_10-block_331-block_52-block_65-block_53-block_4-block_515-block_3-block_174-block_14-block_5-block_589-block_2-block_59-block_1-block_62-block_61-block_18-block_15-block_74-block_4-block_11-block_232-block_3-block_86-block_5-block_167-block_2-block_48-block_1-block_4…
NS_L1_80_Contig33744	#14	502	28	1.10814	1	1		DBLd1-	block_27-block_398-block_5-block_55-block_29-block_198-block_2-
NS_L1_80_Contig33767	#14	550	25	0.903063	2	2		DBLd1-	block_2-block_87-block_29-block_55-block_5-block_27-block_3-
NS_L1_80_Contig33785	#14	907	5756	126.082	3			CIDRb1-	block_21-block_95-block_205-block_31-block_10-block_24-block_1-block_8-block_159-block_22-
NS_L1_80_Contig33807	#14	608	54	1.76454	11	11		DBLd1-CIDRb1-	block_12-block_7-block_1-block_72-block_9-block_6-block_226-block_50-
NS_L1_80_Contig34237	#14	1692	462	5.42478	121	9		DBLz3-DBLe9-	block_2-block_99-block_1-block_62-block_93-block_18-block_124-block_76-block_4-block_11-block_3-block_5-block_213-block_2-block_48-block_1-block_45-block_78-block_28-block_405-block_21-block_41-
NS_L1_80_Contig3436	#14	899	80	1.76795	448	425		DBLd1-CIDRb1-	block_24-block_1-block_8-block_107-block_22-block_50-block_226-block_6-block_9-block_72-block_1-
NS_L1_80_Contig34400	#14	1833	13956	151.265	4			DBLd1-CIDRb5-CIDRa3.1-	block_21-block_137-block_56-block_127-block_31-block_491-block_10-block_24-block_1-block_8-block_22-block_50-block_180-block_6-block_1-block_7-block_12-block_2-block_96-block_55-
NS_L1_80_Contig34594	#14	1443	127	1.74855	3			DBLd1-CIDRb1-CIDRa3.1-	block_7-block_1-block_9-block_6-block_180-block_50-block_22-block_417-block_8-block_1-block_24-block_10-block_271-block_31-block_56-block_26-block_341-block_295-
NS_L1_80_Contig34733	#14	552	30	1.07975	2	2		DBLa0.14-	block_5-block_14-block_54-block_3-block_135-block_13-block_4-block_19-
NS_L1_80_Contig34823	#14	594	34	1.13719				DBLa0.15-DBLa0.1-	block_13-block_188-block_3-block_54-block_14-block_5-block_36-
NS_L1_80_Contig34846	#14	523	42	1.59547				CIDRb6-	block_31-block_10-block_24-block_1-block_8-
NS_L1_80_Contig34887	#14	700	122	3.4626	2	2		CIDRg10-	block_24-block_10-block_31-block_30-block_137-block_120-block_21-block_531-block_182-
NS_L1_80_Contig35038	#14	1045	123	2.33846	105	64		DBLe1-	block_551-block_49-block_18-block_45-block_1-block_48-block_2-block_380-block_5-block_260-block_3-block_353-block_11-
NS_L1_80_Contig35162	#14	574	84	2.90742	6	6		DBLe14-	block_5-block_142-block_2-block_200-block_97-block_206-
NS_L1_80_Contig35377	#14	523	38	1.44352	44	44		DBLa1.7-	block_13-block_3-block_54-block_14-block_210-block_5-block_60-block_2-block_12-
NS_L1_80_Contig35390	#14	1312	116	1.75657	12	1		CIDRa2.2-DBLd1-	block_66-block_4-block_35-block_15-block_30-block_26-block_49-block_10-block_32-block_1-block_8-block_57-block_23-block_181-block_6-
NS_L1_80_Contig35476	#14	1988	182	1.81885	5	1		DBLa2-CIDRa1.8-DBLb12-	block_4-block_5-block_36-block_2-block_7-block_1-block_70-block_9-block_6-block_23-block_57-block_8-block_1-block_121-block_10-block_141-block_52-block_65-block_53-block_4-
NS_L1_80_Contig35516	#14	536	20	0.74132				DBLb5-DBLg4-	block_139-block_15-block_18-block_481-block_61-
NS_L1_80_Contig35556	#14	714	203	5.64857				DBLd1-CIDRg12-	block_8-block_176-block_22-block_85-block_103-block_6-block_483-block_9-block_370-block_1-
NS_L1_80_Contig35624	#14	1215	114	1.8641	19	16		DBLd1-CIDRg7-CIDRg4-	block_2-block_12-block_7-block_1-block_122-block_9-block_6-block_103-block_85-block_22-block_83-block_8-block_8-block_1-block_24-
NS_L1_80_Contig35625	#14	736	43	1.16073				CIDRb1-	block_21-block_33-block_137-block_56-block_31-block_195-block_10-block_24-block_1-
NS_L1_80_Contig35626	#14	502	42	1.66221	60	60		DBLa0.2-	block_2-block_153-block_36-block_5-block_161-block_14-block_79-block_3-block_135-
NS_L1_80_Contig35631	#14	504	79	3.11413				CIDRg10-	block_10-block_195-block_31-block_127-block_28-block_21-
NS_L1_80_Contig35640	#14	1278	107	1.66339	14	1		DBLa0.11-CIDRa2.2-	block_23-block_181-block_6-block_118-block_9-block_70-block_1-block_7-block_12-block_2-block_163-block_36-block_5-block_64-block_14-block_79-block_3-block_494-block_13-block_4-block_19-
NS_L1_80_Contig35648	#14	509	29	1.13193				NTSB-DBLa0.14-	block_4-block_19-block_17-block_20-block_71-
NS_L1_80_Contig35649	#14	701	105	2.97586				CIDRb5-	block_182-block_21-block_120-block_137-block_254-block_31-block_10-block_24-
NS_L1_80_Contig35650	#14	815	96	2.34021	1	1		CIDRb1-	block_8-block_1-block_24-block_10-block_195-block_31-block_56-block_33-block_21-
NS_L1_80_Contig35655	#14	513	28	1.08438				DBLd1-	block_35-block_4-block_73-block_11-block_77-block_16-block_3-
NS_L1_80_Contig35667	#14	521	493	18.7997	356	356		DBLpam3-DBLepam4-	block_306-block_428-block_1-block_305-block_4-
NS_L1_80_Contig35669	#14	1036	76	1.45745	1			NTSB-DBLa0.9-	block_2-block_36-block_5-block_161-block_14-block_54-block_3-block_220-block_13-block_4-block_19-block_17-block_20-
NS_L1_80_Contig35671	#14	523	47	1.78541				DBLd1-	block_35-block_132-block_4-block_81-block_11-block_77-
NS_L1_80_Contig35678	#14	543	47	1.71965				NTSB-DBLa0.11-	block_13-block_4-block_19-block_17-block_20-
NS_L1_80_Contig35693	#14	531	52	1.94558				CIDRb2-	block_1-block_508-block_24-block_10-block_31-block_56-
NS_L1_80_Contig35694	#14	531	96	3.59184				NTSB-DBLa0.5-	block_13-block_4-block_19-block_17-block_20-
NS_L1_80_Contig35695	#14	705	74	2.08537	2	2		DBLg4-	block_1-block_48-block_2-block_133-block_5-block_82-block_3-block_16-block_11-
NS_L1_80_Contig35699	#14	1215	114	1.8641	5			DBLb10-DBLg11-	block_94-block_5-block_82-block_3-block_16-block_11-block_4-block_15-block_18-block_61-block_62-block_119-block_1-block_382-block_59-block_2-
NS_L1_80_Contig35704	#14	536	51	1.89037	37	37		DBLd1-	block_198-block_2-block_12-block_7-block_1-block_9-block_6-
NS_L1_80_Contig35721	#14	544	936	34.1836					block_41-block_21-block_294-block_30-block_56-block_31-block_412-block_10-
NS_L1_80_Contig35727	#14	546	34	1.23716	3	3		DBLd9-CIDRg2-	block_7-block_1-block_9-block_6-block_477-block_85-
NS_L1_80_Contig35736	#14	2469	295	2.37379	46	36		DBLe13-DBLg2-	block_21-block_169-block_18-block_61-block_129-block_1-block_59-block_2-block_94-block_5-block_98-block_3-block_16-block_11-block_4-block_74-block_15-block_18-block_45-block_1-block_48-block_2-block_5-block_3-block_4-
NS_L1_80_Contig35745	#14	823	50	1.20701	1	1		DBLa0.15-	block_13-block_188-block_3-block_54-block_14-block_64-block_5-block_36-block_163-block_2-block_12-block_7-block_1-
NS_L1_80_Contig35748	#14	556	59	2.10823	11	11		DBLpam1-	block_303-block_60-block_2-block_312-block_1-block_351-block_115-block_335-
NS_L1_80_Contig35775	#14	574	374	12.945	28	28		NTSA-DBLa1.5-	block_155-block_20-block_17-block_19-block_4-block_13-
NS_L1_80_Contig35781	#14	580	104	3.56243	126	126		DBLe3-	block_5-block_126-block_3-block_160-block_4-block_76-block_355-
NS_L1_80_Contig35791	#14	587	37	1.25229	1	1		CIDRb5-CIDRg5-	block_21-block_30-block_127-block_31-block_10-block_24-
NS_L1_80_Contig35795	#14	5539	5449	19.5446	7			DBLa0.11-CIDRa2.4-DBLd1-CIDRb1-DBLg9-	block_2-block_12-block_7-block_1-block_70-block_9-block_6-block_23-block_57-block_116-block_8-block_1-block_32-block_10-block_26-block_15-block_35-block_4-block_11-block_77-block_16-block_3-block_27-block_5-block_90-block_29-block_2-block_12-block_7-block_1-block_9-block_6-block_243-block_50-block_22-block_8-block_1-block_24-block_10-block_491-block_31-block_56-block_15-block_139-block_4-block_11…
NS_L1_80_Contig35807	#14	692	438	12.575	1	1		DBLa0.11-CIDRa2.4-	block_8-block_116-block_57-block_23-block_181-block_6-block_118-block_9-block_70-block_1-
NS_L1_80_Contig35815	#14	604	22	0.723647				DBLa0.9-	block_5-block_36-block_2-block_12-block_7-block_1-block_239-block_9-
NS_L1_80_Contig35819	#14	845	780	18.3391	4	4		CIDRpam-DBLpam3-	block_344-block_342-block_1-block_329-
NS_L1_80_Contig35823	#14	2134	779	7.25243	2			CIDRa2.6-DBLb8-	block_154-block_57-block_116-block_8-block_1-block_32-block_10-block_52-block_65-block_53-block_4-block_13-block_3-block_467-block_14-block_5-block_625-block_2-block_59-block_1-block_62-block_209-block_61-block_18-block_426-
NS_L1_80_Contig35828	#14	611	123	3.99949	11	11		DBLb3-	block_65-block_53-block_4-block_13-block_234-block_3-block_457-block_14-
NS_L1_80_Contig35829_manual_selection	#14	612	64	2.07764					block_42-block_112-block_39-block_322-block_40-block_38-block_44-block_46-
NS_L1_80_Contig35830	#14	612	208	6.75232				DBLd1-	block_5-block_55-block_29-block_198-block_2-block_12-block_7-block_1-
NS_L1_80_Contig35831	#14	613	78	2.52799	1	1		CIDRg9-	block_24-block_10-block_31-block_56-block_28-block_21-
NS_L1_80_Contig35837	#14	615	3001	96.9464	8	8		DBLb1-	block_146-block_14-block_199-block_5-block_183-block_2-block_59-block_250-block_1-
NS_L1_80_Contig35852	#14	750	46	1.21853	25	25		CIDRa2.8-	block_251-block_23-block_514-block_57-block_223-block_8-block_1-block_32-block_611-
NS_L1_80_Contig35865	#14	639	123	3.82424				DBLa0.5-	block_4-block_13-block_215-block_3-block_79-block_14-block_5-block_36-block_88-block_2-
NS_L1_80_Contig35869	#14	644	140	4.319	1	1		DBLg3-DBLz5-	block_3-block_393-block_13-block_4-block_318-block_18-block_45-
NS_L1_80_Contig35878	#14	653	74	2.25143	5	5		DBLpam2-	block_14-block_325-block_3-block_620-block_13-block_4-block_335-
NS_L1_80_Contig35880	#14	654	2876	87.3679	18	18		DBLb5-	block_1-block_59-block_2-block_5-block_14-block_317-block_3-
NS_L1_80_Contig35916	#14	679	64	1.87263	1	1		DBLa0.12-CIDRa2.4-	block_1-block_70-block_9-block_118-block_6-block_181-block_23-block_57-block_8-
NS_L1_80_Contig35921	#14	786	655	16.5562	2	2		DBLpam3-	block_4-block_307-block_484-block_3-block_314-block_313-block_2-block_306-block_428-block_1-
NS_L1_80_Contig35924	#14	988	320	6.43478				DBLd1-	block_4-block_165-block_11-block_77-block_16-block_3-block_27-block_5-block_249-block_29-block_87-block_2-block_12-block_7-
NS_L1_80_Contig35926	#14	690	381	10.9703	2	2		NTSB-DBLa0.11-	block_13-block_4-block_19-block_17-block_20-
NS_L1_80_Contig35930	#14	695	178	5.08834				NTSB-DBLa0.13-	block_194-block_20-block_17-block_19-block_4-
NS_L1_80_Contig35934	#14	711	47	1.31332	5	5		DBLd1-	block_5-block_27-block_228-block_3-block_16-block_77-block_11-block_106-block_4-block_35-
NS_L1_80_Contig35936	#14	699	98	2.78541				DBLa0.5-CIDRa2.8-	block_1-block_9-block_75-block_6-block_251-block_23-block_57-block_8-
NS_L1_80_Contig35937	#14	717	73	2.02276	1	1		DBLb1-	block_5-block_187-block_2-block_59-block_1-block_62-block_61-
NS_L1_80_Contig35940	#14	1134	174	3.04844	3	2		DBLb1-DBLg18-	block_272-block_14-block_199-block_5-block_183-block_2-block_48-block_604-block_1-block_119-block_62-block_61-block_18-block_15-
NS_L1_80_Contig35953	#14	719	2064	57.0324	28	19		DBLb3-	block_10-block_491-block_52-block_65-block_53-block_4-block_584-block_13-
NS_L1_80_Contig35957	#14	723	54	1.48387	4	4		CIDRb5-	block_33-block_30-block_127-block_31-block_10-block_24-block_1-
NS_L1_80_Contig35959	#14	724	54	1.48182	4	3		CIDRg10-	block_21-block_33-block_56-block_10-block_24-block_1-
NS_L1_80_Contig35963	#14	725	2607	71.4404	20	20		DBLb5-	block_495-block_3-block_146-block_14-block_436-block_5-block_259-block_2-block_59-block_1-block_62-
NS_L1_80_Contig35969	#14	1125	139	2.45473	17			NTSA-DBLa1.2-	block_1-block_7-block_12-block_2-block_60-block_5-block_14-block_219-block_3-block_13-block_4-block_19-block_17-
NS_L1_80_Contig35970	#14	735	586	15.8399				DBLd1-	block_253-block_82-block_5-block_55-block_29-block_198-block_2-block_12-block_7-block_1-
NS_L1_80_Contig35988	#14	830	84	2.01068	15	15		CIDRb1-	block_8-block_1-block_24-block_10-block_459-block_31-block_56-block_366-block_21-
NS_L1_80_Contig35989	#14	753	204	5.3824	2	2		DBLd1-	block_1-block_7-block_12-block_2-block_105-block_29-block_55-block_5-block_487-block_27-block_253-block_3-
NS_L1_80_Contig35991	#14	755	2491	65.5492				DBLb10-DBLd1-	block_4-block_34-block_35-block_15-block_26-block_49-block_18-block_61-block_62-
NS_L1_80_Contig35994	#14	760	92	2.405	2	2		CIDRg10-	block_21-block_33-block_137-block_56-block_31-block_491-block_10-block_24-
NS_L1_80_Contig36001	#14	767	47	1.21743	1	1		DBLa1.2-	block_19-block_4-block_13-block_3-block_219-block_14-block_179-block_5-block_60-block_2-block_12-
NS_L1_80_Contig36027_manual_selection	#14	800	437	10.8526	391	318			block_44-block_38-block_40-block_242-block_39-block_84-block_164-block_42-block_25-block_321-block_43-
NS_L1_80_Contig36028	#14	801	111	2.75316				DBLb5-	block_272-block_14-block_5-block_187-block_2-block_59-block_1-block_119-block_62-block_61-
NS_L1_80_Contig36031	#14	802	185	4.58288	6	6		DBLz4-	block_93-block_283-block_1-block_99-block_2-block_92-block_284-block_5-block_3-block_393-
NS_L1_80_Contig36034	#14	805	189	4.66452	29	28		CIDRb1-CIDRa2.2-	block_8-block_1-block_24-block_10-block_195-block_31-block_56-block_33-block_21-block_418-
NS_L1_80_Contig36035	#14	808	2323	57.1187	28	16		DBLb5-	block_10-block_61-block_62-block_1-block_59-block_2-block_499-block_5-block_199-block_14-block_146-
NS_L1_80_Contig36039	#14	815	2614	63.7219				DBLb10-	block_13-block_278-block_4-block_53-block_65-block_52-block_26-block_49-block_10-block_71-
NS_L1_80_Contig36047	#14	891	147	3.27778	2	1		CIDRa3.1-DBLb5-	block_32-block_10-block_101-block_52-block_65-block_53-block_4-block_13-block_3-
NS_L1_80_Contig36050	#14	821	120	2.90388	13	8		CIDRd1-	block_1-block_24-block_10-block_31-block_56-block_28-block_21-block_41-
NS_L1_80_Contig36053	#14	857	76	1.76187	1	1		CIDRb1-	block_21-block_33-block_56-block_31-block_10-block_24-block_1-block_8-
NS_L1_80_Contig36064	#14	843	1103	25.9949	1	1		DBLa0.12-CIDRa2.4-	block_8-block_57-block_23-block_181-block_6-block_118-block_9-block_70-block_1-block_7-block_12-
NS_L1_80_Contig36066	#14	847	156	3.65916	18	17		DBLd1-CIDRb1-	block_8-block_417-block_22-block_50-block_138-block_6-block_496-block_9-block_497-block_1-block_7-block_12-block_2-
NS_L1_80_Contig36069	#14	1016	381	7.45027				CIDRg4-	block_8-block_1-block_24-block_10-block_31-block_56-block_33-block_21-block_539-
NS_L1_80_Contig36072	#14	861	3062	70.655	19	18		DBLb10-DBLb8-	block_62-block_61-block_18-block_347-block_52-block_65-block_375-block_4-block_584-block_13-
NS_L1_80_Contig36074	#14	862	347	7.99766				CIDRb1-CIDRa3.1-	block_21-block_205-block_31-block_10-block_24-block_1-block_8-
NS_L1_80_Contig36088	#14	897	374	8.28362	1			DBLd1-	block_165-block_11-block_77-block_16-block_3-block_437-block_177-block_27-block_561-block_5-block_29-block_105-block_2-
NS_L1_80_Contig36095	#14	914	76	1.65199	1			DBLd1-	block_4-block_66-block_11-block_158-block_16-block_3-block_253-block_27-block_5-block_55-block_29-block_87-
NS_L1_80_Contig36099	#14	927	139	2.97904	44	38		DBLd7-CIDRb6-	block_8-block_172-block_22-block_50-block_6-block_9-block_72-block_1-block_7-block_12-block_2-
NS_L1_80_Contig36100	#14	928	150	3.21132	18			CIDRg9-DBLg3-	block_24-block_10-block_31-block_15-block_74-block_4-block_11-block_16-block_3-block_82-block_5-
NS_L1_80_Contig36107	#14	951	115	2.40247	44	43		CIDRb1-	block_21-block_28-block_56-block_31-block_10-block_24-block_1-block_8-block_287-
NS_L1_80_Contig36109_manual_selection	#14	995	87	1.73715	330	321			block_25-block_42-block_164-block_84-block_39-block_117-block_40-block_38-block_44-block_25-block_203-block_46-block_47-
NS_L1_80_Contig36112	#14	961	61	1.26109	1			DBLd1-	block_252-block_3-block_16-block_273-block_11-block_81-block_4-block_435-block_35-block_15-block_26-block_10-
NS_L1_80_Contig36113	#14	961	355	7.33915	1			CIDRa2.3-CIDRa3.1-DBLd1-	block_4-block_35-block_15-block_30-block_26-block_49-block_10-block_447-block_32-block_1-block_472-block_8-
NS_L1_80_Contig36121	#14	2547	412	3.21373	16			DBLa0.9-CIDRa2.2-DBLd1-	block_2-block_12-block_7-block_1-block_184-block_9-block_118-block_6-block_251-block_23-block_57-block_8-block_1-block_32-block_10-block_49-block_26-block_30-block_15-block_35-block_4-block_11-block_237-block_16-block_3-block_27-block_5-block_55-block_29-block_105-block_2-
NS_L1_80_Contig36126	#14	981	94	1.9037				CIDRa3.2-DBLd1-	block_8-block_1-block_299-block_32-block_168-block_10-block_506-block_30-block_15-block_35-
NS_L1_80_Contig36134	#14	3162	563	3.53743	2			DBLa0.15-CIDRa2.3-DBLd1-	block_2-block_105-block_29-block_448-block_55-block_5-block_27-block_177-block_3-block_16-block_289-block_11-block_165-block_357-block_4-block_35-block_15-block_30-block_26-block_10-block_32-block_1-block_8-block_223-block_57-block_23-block_251-block_6-block_9-block_184-block_1-block_7-block_12-block_2-block_88-block_36-block_5-block_14-block_54-block_3-
NS_L1_80_Contig36137	#14	1011	335	6.58316	3	3		CIDRg7-CIDRb5-	block_8-block_1-block_24-block_10-block_374-block_31-block_127-block_346-block_33-block_21-
NS_L1_80_Contig36139	#14	2175	154	1.4067	4	1		DBLd3-CIDRg2-	block_376-block_254-block_31-block_10-block_24-block_1-block_533-block_8-block_176-block_22-block_85-block_6-block_9-block_151-block_1-block_7-block_12-block_2-block_90-block_5-block_27-block_3-block_16-block_11-block_165-
NS_L1_80_Contig36142	#14	1025	841	16.301				CIDRa3.4-DBLd1-	block_8-block_1-block_32-block_615-block_10-block_26-block_15-block_35-block_4-block_157-
NS_L1_80_Contig36160	#14	1080	278	5.11401	1			NTSB-DBLa0.9-	block_71-block_20-block_17-block_19-block_4-block_13-block_102-block_3-block_54-block_14-block_64-block_5-block_36-block_2-
NS_L1_80_Contig36166	#14	1088	459	8.38155	5	5		NTSB-DBLa0.15-	block_12-block_2-block_36-block_5-block_556-block_14-block_524-block_3-block_13-block_4-block_19-block_17-block_20-
NS_L1_80_Contig36169	#14	1106	2258	40.5611	31			DBLg2-	block_557-block_15-block_74-block_4-block_11-block_16-block_3-block_98-block_5-block_29-block_2-block_59-block_1-block_62-
NS_L1_80_Contig36176	#14	1136	874	15.2853	20	8		NTSA-DBLa1.7-	block_12-block_2-block_60-block_5-block_14-block_204-block_3-block_13-block_4-block_19-block_17-block_20-block_155-
NS_L1_80_Contig36179	#14	1784	407	4.53253	34	26		DBLa1.2-CIDRa1.5-DBLb3-	block_174-block_3-block_13-block_584-block_4-block_53-block_65-block_52-block_101-block_10-block_121-block_1-block_8-block_57-block_23-block_150-block_6-block_536-block_9-block_1-
NS_L1_80_Contig36180	#14	1122	310	5.48921	5	4		CIDRa3.2-DBLd1-	block_3-block_16-block_77-block_11-block_469-block_4-block_35-block_15-block_30-block_49-block_10-block_32-block_299-block_1-
NS_L1_80_Contig36185	#14	3022	413	2.71517	92	21		DBLg14-DBLz3-DBLe6-	block_94-block_2-block_48-block_1-block_45-block_18-block_318-block_4-block_13-block_3-block_5-block_92-block_2-block_99-block_1-block_115-block_93-block_18-block_124-block_76-block_4-block_11-block_3-block_108-block_5-block_213-block_2-block_48-block_1-block_45-block_78-block_28-block_405-block_21-
NS_L1_80_Contig36187	#14	1177	479	8.08537	1	1		CIDRa2.5-DBLd1-	block_4-block_35-block_15-block_30-block_26-block_10-block_125-block_32-block_1-block_226-block_8-block_263-block_154-block_23-
NS_L1_80_Contig36195	#14	1162	403	6.89033	4			CIDRa3.2-CIDRa3.1-DBLd1-	block_67-block_8-block_1-block_512-block_32-block_10-block_26-block_127-block_30-block_15-block_35-block_4-
NS_L1_80_Contig36213	#14	1226	238	3.8568	28	24		NTSA-DBLa1.2-	block_1-block_7-block_12-block_2-block_60-block_5-block_14-block_219-block_3-block_13-block_4-block_19-block_17-block_20-block_155-
NS_L1_80_Contig36214	#14	1227	269	4.35561				DBLz4-	block_3-block_14-block_5-block_284-block_92-block_2-block_99-block_1-block_283-block_93-block_18-block_582-block_280-block_21-block_41-
NS_L1_80_Contig36217	#14	1379	159	2.29073	1			DBLd4-CIDRg6-	block_11-block_158-block_16-block_3-block_27-block_5-block_90-block_96-block_2-block_12-block_7-block_1-block_9-block_458-block_6-block_85-block_22-
NS_L1_80_Contig36230	#14	1277	176	2.73818	11			NTSB-DBLa0.17-	block_71-block_20-block_17-block_19-block_4-block_13-block_135-block_3-block_446-block_14-block_64-block_5-block_36-block_88-block_2-block_130-block_7-
NS_L1_80_Contig36234	#14	1300	1094	16.7192				DBLd1-	block_157-block_11-block_109-block_16-block_3-block_156-block_27-block_5-block_55-block_29-block_105-block_2-block_12-block_7-block_1-block_122-block_9-block_178-
NS_L1_80_Contig36241	#14	1491	407	5.42322	283	8		DBLe3-	block_206-block_76-block_4-block_160-block_3-block_126-block_5-block_222-block_2-block_48-block_1-block_414-block_78-block_33-block_294-block_21-
NS_L1_80_Contig36243	#14	1322	653	9.81347	16	13		DBLa0.16-CIDRa3.1-	block_8-block_316-block_67-block_110-block_63-block_208-block_23-block_68-block_6-block_9-block_320-block_1-block_7-block_12-block_2-block_36-block_5-block_14-block_79-
NS_L1_80_Contig36244	#14	1322	6585	98.9612	26	13		CIDRg10-DBLb5-	block_10-block_491-block_52-block_65-block_53-block_4-block_13-block_3-block_14-block_436-block_5-block_2-block_59-block_1-block_119-block_62-
NS_L1_80_Contig36260	#14	1399	749	10.6367	14	3		CIDRa3.4-DBLd1-	block_253-block_3-block_16-block_11-block_73-block_4-block_35-block_15-block_332-block_26-block_26-block_49-block_10-block_125-block_168-block_32-block_334-block_1-block_8-
NS_L1_80_Contig36262	#14	1404	249	3.52349	34	31		DBLb2-DBLg13-DBLz2-	block_318-block_18-block_45-block_1-block_48-block_2-block_133-block_5-block_86-block_3-block_201-block_11-block_4-block_15-block_18-block_481-block_61-
NS_L1_80_Contig36272	#14	1533	248	3.21403	5			CIDRa2.2-DBLd1-	block_3-block_16-block_77-block_11-block_106-block_357-block_4-block_35-block_15-block_26-block_241-block_10-block_32-block_1-block_8-block_57-block_23-
NS_L1_80_Contig36280	#14	1494	3179	42.2747	29	6		DBLg13-DBLg4-	block_11-block_4-block_74-block_15-block_612-block_18-block_45-block_1-block_48-block_2-block_94-block_5-block_98-block_3-block_16-block_11-block_4-block_74-block_15-block_557-
NS_L1_80_Contig36281	#14	1522	163	2.12772	6			DBLd1-CIDRb1-	block_156-block_5-block_301-block_29-block_87-block_2-block_12-block_7-block_1-block_72-block_9-block_6-block_50-block_22-block_107-block_8-block_1-block_456-block_24-
NS_L1_80_Contig36294	#14	2192	657	5.95478	99			DBLa0.9-CIDRa2.7-CIDRa3.1-DBLd1-	block_3-block_16-block_237-block_11-block_469-block_4-block_34-block_35-block_15-block_30-block_26-block_10-block_168-block_32-block_1-block_8-block_116-block_57-block_23-block_6-block_118-block_9-block_70-block_1-
NS_L1_80_Contig36297	#14	1580	546	6.86557	8	6		NTSB-DBLa0.11-CIDRa2.4-	block_6-block_268-block_9-block_70-block_1-block_7-block_12-block_2-block_88-block_36-block_5-block_64-block_14-block_54-block_3-block_102-block_13-block_4-block_19-block_17-block_20-block_216-
NS_L1_80_Contig36299	#14	1591	1349	16.8454	2	1		DBLd1-CIDRb7-	block_21-block_127-block_31-block_10-block_24-block_1-block_8-block_287-block_22-block_50-block_243-block_6-block_9-block_72-block_1-
NS_L1_80_Contig36306	#14	1628	1562	19.062	1	1		DBLepam5-DBLe10-	block_142-block_2-block_371-block_1-block_97-block_206-block_76-block_4-block_160-block_3-block_126-block_5-block_2-block_48-block_1-block_45-block_78-block_21-block_41-
NS_L1_80_Contig36309	#14	1634	111	1.34962	37			CIDRa2.3-DBLb13-	block_32-block_10-block_347-block_52-block_65-block_53-block_4-block_278-block_13-block_495-block_3-block_146-block_14-block_5-block_183-block_2-block_59-block_1-block_62-block_61-block_18-block_28-
NS_L1_80_Contig36311	#14	1645	1550	18.72	1			DBLd1-CIDRb1-	block_41-block_21-block_120-block_127-block_31-block_271-block_10-block_24-block_607-block_1-block_8-block_159-block_22-block_50-block_6-block_9-block_72-block_1-block_7-block_12-block_2-
NS_L1_80_Contig36312	#14	1749	3719	42.2452	1			DBLd1-CIDRb1-DBLb8-	block_2-block_12-block_7-block_1-block_6-block_180-block_50-block_22-block_159-block_8-block_1-block_24-block_10-block_31-block_127-block_33-block_21-
NS_L1_80_Contig36313	#14	1651	276	3.32126	11	1		DBLd1-CIDRg9-	block_8-block_384-block_22-block_148-block_6-block_9-block_122-block_1-block_7-block_12-block_2-block_198-block_29-block_55-block_5-block_437-block_3-block_16-block_77-block_11-
NS_L1_80_Contig36315	#14	1664	404	4.82357	1			DBLd1-CIDRb1-	block_21-block_294-block_28-block_127-block_31-block_10-block_24-block_1-block_8-block_159-block_22-block_50-block_6-block_9-block_72-block_1-block_7-block_12-block_2-
NS_L1_80_Contig36316	#14	1676	1039	12.3164	1	1		DBLd4-CIDRg1-	block_2-block_12-block_7-block_1-block_122-block_9-block_458-block_6-block_148-block_22-block_522-block_8-block_1-block_24-block_10-block_224-block_31-block_127-
NS_L1_80_Contig36319	#14	1699	242	2.82985	3			CIDRa3.2-CIDRa3.1-DBLd1-	block_32-block_615-block_10-block_26-block_30-block_15-block_35-block_4-block_11-block_158-block_16-block_3-block_27-block_5-block_301-block_29-block_105-block_2-block_12-block_7-
NS_L1_80_Contig36323	#14	1752	247	2.80094	1			DBLg10-DBLd1-	block_18-block_28-block_28-block_26-block_15-block_35-block_4-block_81-block_11-block_296-block_16-block_3-block_156-block_27-block_5-block_55-block_29-block_105-block_2-
NS_L1_80_Contig36351	#14	2061	726	6.99841	10			NTSB-DBLa0.13-CIDRa2.3-	block_8-block_223-block_57-block_23-block_181-block_6-block_75-block_9-block_34-block_1-block_7-block_12-block_2-block_163-block_36-block_5-block_14-block_79-block_3-block_13-block_4-block_19-block_17-block_20-
NS_L1_80_Contig36352	#14	2045	1169	11.357	9			DBLb6-DBLg4-	block_62-block_61-block_18-block_15-block_74-block_4-block_11-block_3-block_82-block_5-block_133-block_2-block_1-block_45-block_18-block_137-block_26-block_21-
NS_L1_80_Contig36354	#14	2043	633	6.15568	21	4	PfIT_120060400	NTSB-DBLa0.23-CIDRa3.3-	block_8-block_333-block_67-block_114-block_63-block_23-block_68-block_6-block_75-block_9-block_34-block_1-block_7-block_12-block_2-block_36-block_5-block_14-block_171-block_3-block_102-block_13-block_4-block_19-block_17-block_20-block_71-
NS_L1_80_Contig36355	#14	2905	361	2.46889	3			CIDRg9-DBLz6-DBLe6-	block_21-block_529-block_78-block_45-block_1-block_48-block_2-block_213-block_5-block_108-block_3-block_11-block_4-block_76-block_124-block_18-block_93-block_115-block_1-block_99-block_2-block_92-block_559-block_5-block_3-block_13-block_4-block_123-block_52-block_31-block_10-
NS_L1_80_Contig36359	#14	3827	12949	67.2231	45			DBLb8-DBLd1-CIDRb1-	block_21-block_205-block_31-block_10-block_24-block_1-block_8-block_159-block_22-block_50-block_180-block_6-block_504-block_9-block_1-block_7-block_12-block_2-block_87-block_29-block_301-block_5-block_433-block_82-block_253-block_3-block_16-block_237-block_11-block_4-block_35-block_15-block_30-block_26-block_18-block_61-block_209-block_62-block_1-block_59-block_2-block_5-block_14-block_174-block_…
NS_L1_80_Contig36361	#14	2106	526	4.96213				NTSB-DBLa0.16-CIDRa3.4-	block_8-block_482-block_67-block_114-block_63-block_23-block_68-block_6-block_350-block_9-block_70-block_1-block_7-block_12-block_2-block_163-block_36-block_5-block_14-block_79-block_3-block_220-block_13-block_4-block_19-block_17-block_20-
NS_L1_80_Contig36366	#14	2118	335	3.14239	8			DBLb8-DBLg9-DBLz1-	block_549-block_5-block_14-block_3-block_13-block_4-block_53-block_550-block_18-block_45-block_1-block_48-block_2-block_94-block_623-block_5-block_86-block_3-block_11-block_4-block_139-block_15-block_18-block_61-
NS_L1_80_Contig36371	#14	3388	1484	8.70224	25			NTSB-DBLa0.8-CIDRa3.4-DBLd1-	block_599-block_20-block_17-block_19-block_4-block_13-block_616-block_3-block_54-block_14-block_64-block_5-block_36-block_2-block_130-block_7-block_1-block_34-block_9-block_75-block_6-block_68-block_23-block_208-block_63-block_67-block_333-block_8-block_1-block_563-block_32-block_10-block_15-block_35-block_4-block_106-block_11-block_16-block_3-
NS_L1_80_Contig36372	#14	2156	550	5.06821	2			CIDRa3.2-DBLd1-	block_483-block_9-block_370-block_1-block_7-block_12-block_2-block_170-block_29-block_55-block_5-block_27-block_358-block_3-block_16-block_158-block_11-block_73-block_507-block_4-block_35-block_15-block_26-block_49-block_10-block_32-block_1-block_441-
NS_L1_80_Contig36373	#14	2165	1402	12.8656	1	1		DBLd1-CIDRb1-	block_41-block_21-block_120-block_56-block_31-block_271-block_10-block_24-block_1-block_8-block_287-block_22-block_50-block_6-block_9-block_72-block_1-block_7-block_2-block_498-block_29-block_55-block_5-block_461-block_27-block_253-
NS_L1_80_Contig36380	#14	2258	4582	40.3155	7			CIDRd1-DBLb3-	block_22-block_83-block_8-block_1-block_617-block_24-block_10-block_622-block_190-block_30-block_141-block_52-block_65-block_53-block_4-block_319-block_13-block_3-block_457-block_14-block_5-block_589-block_2-block_59-block_250-block_1-block_614-block_62-block_61-block_18-block_557-
NS_L1_80_Contig36383	#14	2388	7264	60.4341	16	3		DBLb9-DBLg2-DBLg4-	block_11-block_4-block_139-block_15-block_18-block_61-block_62-block_1-block_59-block_2-block_94-block_623-block_5-block_27-block_3-block_16-block_11-block_4-block_15-block_18-block_61-block_62-block_1-block_59-block_2-block_183-block_5-block_14-block_467-block_3-
NS_L1_80_Contig36388	#14	2459	703	5.67986	17	6		DBLa0.8-CIDRa3.2-CIDRa3.1-DBLd1-	block_35-block_15-block_30-block_341-block_26-block_10-block_32-block_1-block_8-block_333-block_67-block_63-block_23-block_68-block_6-block_75-block_9-block_184-block_1-block_7-block_130-block_2-block_36-block_5-block_64-block_14-block_3-block_381-block_13-block_4-
NS_L1_80_Contig36389	#14	2462	3175	25.621	1			DBLd1-CIDRb1-	block_21-block_127-block_31-block_10-block_24-block_1-block_8-block_159-block_22-block_50-block_243-block_6-block_443-block_9-block_72-block_1-block_7-block_12-block_2-block_87-block_29-block_55-block_5-block_27-block_3-block_16-block_273-block_11-block_165-block_4-
NS_L1_80_Contig36393	#14	2536	1154	9.0406	591	373		DBLg8-DBLz1-DBLe5-	block_2-block_48-block_1-block_425-block_45-block_18-block_546-block_52-block_550-block_53-block_4-block_13-block_545-block_3-block_603-block_14-block_602-block_5-block_549-block_92-block_2-block_99-block_1-block_115-block_93-block_18-block_124-block_76-block_4-block_475-block_11-block_3-block_126-block_5-block_2-block_200-
NS_L1_80_Contig36404	#14	2768	4083	29.3058	3			DBLa0.10-CIDRa2.4-DBLd1-	block_2-block_12-block_7-block_1-block_70-block_9-block_118-block_6-block_181-block_23-block_57-block_8-block_1-block_32-block_10-block_506-block_15-block_35-block_435-block_4-block_11-block_273-block_16-block_3-block_177-block_27-block_5-block_29-block_87-block_2-
NS_L1_80_Contig36408	#14	2907	1003	6.85483	14	8		DBLg4-DBLz2-DBLe4-	block_1-block_48-block_2-block_293-block_5-block_3-block_11-block_4-block_76-block_407-block_18-block_93-block_115-block_1-block_403-block_2-block_92-block_5-block_14-block_3-block_13-block_4-block_318-block_18-block_45-block_1-block_48-block_2-block_167-block_90-block_5-block_82-block_3-
NS_L1_80_Contig36412	#14	2930	1048	7.10615	3			DBLa0.11-CIDRa2.1-DBLe13-	block_2-block_12-block_7-block_1-block_70-block_9-block_118-block_6-block_57-block_116-block_8-block_1-block_32-block_10-block_26-block_4-block_11-block_3-block_5-block_2-block_48-block_1-block_45-block_18-block_355-block_21-block_41-
NS_L1_80_Contig36417	#14	3197	1833	11.391	19			CIDRa3.2-DBLd1-CIDRb6-	block_21-block_56-block_31-block_521-block_10-block_24-block_1-block_8-block_172-block_22-block_50-block_243-block_6-block_244-block_9-block_497-block_1-block_7-block_12-block_2-block_96-block_90-block_5-block_27-block_3-block_16-block_77-block_11-block_4-block_35-block_15-block_30-block_10-block_32-block_1-block_8-
NS_L1_80_Contig36419	#14	3194	1246	7.7504	17	1		DBLb3-DBLg11-DBLd1-	block_174-block_14-block_5-block_2-block_59-block_1-block_62-block_61-block_18-block_28-block_15-block_74-block_4-block_11-block_16-block_3-block_86-block_5-block_90-block_29-block_2-block_48-block_1-block_45-block_18-block_26-block_26-block_15-block_35-block_4-block_81-block_11-block_109-block_16-block_3-block_253-
NS_L1_80_Contig36423	#14	5018	6799	26.9188	20			DBLa0.5-CIDRa2.10-DBLd1-CIDRb1-	block_14-block_64-block_5-block_36-block_153-block_2-block_12-block_7-block_1-block_34-block_9-block_75-block_6-block_181-block_23-block_154-block_57-block_8-block_1-block_32-block_10-block_26-block_15-block_35-block_4-block_165-block_11-block_77-block_16-block_3-block_252-block_452-block_5-block_55-block_29-block_105-block_2-block_12-block_7-block_1-block_6-block_173-block_50-block_22-block_159-…
NS_L1_80_Contig36424	#14	3391	938	5.49561	3			NTSB-DBLa0.1-CIDRa3.1-DBLd1-	block_3-block_16-block_158-block_11-block_106-block_4-block_35-block_15-block_26-block_10-block_168-block_32-block_1-block_8-block_67-block_110-block_63-block_104-block_23-block_68-block_6-block_75-block_9-block_34-block_1-block_7-block_130-block_2-block_88-block_36-block_5-block_64-block_14-block_54-block_3-block_188-block_13-block_4-block_19-block_17-block_20-
NS_L1_80_Contig36425	#14	6829	2296	6.67968	1446	330	PfGB4_050038700 PF3D7_0533100 PfKH01_050037900 PfKH01_050037900	NTSA-DBLa1.4-CIDRa1.3-DBLb1-DBLg15-DBLe1-DBLg8-	block_264-block_20-block_17-block_19-block_4-block_13-block_3-block_248-block_14-block_5-block_60-block_2-block_12-block_7-block_1-block_70-block_9-block_6-block_150-block_23-block_57-block_8-block_1-block_121-block_368-block_10-block_141-block_52-block_65-block_53-block_4-block_13-block_3-block_146-block_14-block_5-block_470-block_183-block_2-block_59-block_1-block_62-block_61-block_18-block_15-…
NS_L1_80_Contig36426	#14	3730	13974	74.4308	7			NTSB-DBLa0.19-CIDRa2.3-DBLd1-	block_71-block_20-block_17-block_19-block_4-block_13-block_494-block_3-block_54-block_14-block_5-block_60-block_2-block_12-block_7-block_1-block_34-block_9-block_118-block_6-block_143-block_23-block_57-block_223-block_8-block_1-block_32-block_10-block_241-block_26-block_15-block_35-block_4-block_397-block_165-block_11-block_296-block_16-block_3-block_437-block_177-block_27-block_5-
NS_L1_80_Contig36427	#14	5739	1232	4.26496	97			DBLb1-DBLg12-DBLd5-CIDRb3-DBLb6-	block_1-block_59-block_2-block_589-block_5-block_14-block_174-block_3-block_13-block_520-block_4-block_53-block_65-block_52-block_331-block_10-block_24-block_1-block_8-block_276-block_22-block_50-block_505-block_6-block_9-block_151-block_1-block_7-block_12-block_2-block_96-block_90-block_5-block_27-block_3-block_16-block_77-block_11-block_4-block_15-block_78-block_45-block_1-block_136-block_2-blo…
NS_L1_80_Contig36428	#14	3689	3224	17.3631				DBLa0.8-CIDRa5-DBLd1-	block_4-block_13-block_3-block_171-block_14-block_64-block_5-block_36-block_2-block_12-block_7-block_1-block_34-block_9-block_6-block_23-block_57-block_8-block_1-block_32-block_10-block_26-block_15-block_35-block_4-block_73-block_11-block_158-block_16-block_3-block_27-block_5-block_55-block_29-block_105-block_2-block_12-block_7-block_1-
NS_L1_80_Contig36431	#14	5630	1922	6.78244	30	1		DBLb5-DBLd8-CIDRb2-DBLg3-DBLz4-	block_43-block_196-block_41-block_21-block_280-block_18-block_93-block_283-block_1-block_99-block_2-block_92-block_284-block_5-block_14-block_3-block_393-block_13-block_4-block_53-block_338-block_123-block_52-block_18-block_45-block_1-block_48-block_2-block_167-block_5-block_82-block_3-block_16-block_11-block_4-block_74-block_15-block_10-block_24-block_1-block_8-block_440-block_22-block_6-block_9…
NS_L1_80_Contig36432	#14	4311	974	4.48871	12			DBLa0.12-CIDRa2.2-DBLd1-CIDRb1-	block_2-block_12-block_7-block_1-block_70-block_9-block_118-block_6-block_438-block_23-block_57-block_8-block_1-block_32-block_10-block_26-block_15-block_35-block_34-block_435-block_4-block_73-block_11-block_289-block_16-block_3-block_253-block_27-block_5-block_55-block_29-block_105-block_2-block_12-block_7-block_1-block_72-block_9-block_6-block_180-block_50-block_22-block_159-block_8-block_1-blo…
NS_L1_80_Contig36435	#14	4630	1495	6.41506	80			CIDRa2.6-DBLb5-DBLg5-DBLd1-	block_23-block_154-block_63-block_116-block_8-block_1-block_532-block_32-block_10-block_52-block_65-block_53-block_4-block_290-block_13-block_234-block_3-block_272-block_14-block_5-block_499-block_2-block_59-block_1-block_62-block_61-block_18-block_246-block_26-block_15-block_4-block_11-block_3-block_86-block_5-block_167-block_2-block_136-block_1-block_258-block_45-block_257-block_30-block_15-blo…
NS_L1_80_Contig36438	#14	5234	3796	14.409	91		PfIT_120045700	DBLd1-CIDRb1-DBLg10-DBLz3-DBLe12-	block_55-block_29-block_170-block_2-block_12-block_7-block_1-block_9-block_6-block_138-block_50-block_22-block_107-block_8-block_1-block_24-block_10-block_31-block_15-block_139-block_4-block_11-block_16-block_3-block_86-block_5-block_90-block_29-block_2-block_48-block_1-block_45-block_18-block_355-block_123-block_356-block_53-block_4-block_13-block_3-block_429-block_14-block_5-block_92-block_2-bl…
NS_L1_80_Contig36439	#14	7729	9039	23.2347	28			NTSB-DBLa0.6-CIDRa3.1-DBLb5-DBLg5-DBLd1-CIDRb5-	block_20-block_17-block_19-block_4-block_13-block_188-block_3-block_79-block_14-block_64-block_5-block_36-block_2-block_12-block_7-block_1-block_34-block_9-block_75-block_245-block_6-block_68-block_23-block_208-block_63-block_110-block_67-block_8-block_1-block_32-block_611-block_10-block_347-block_52-block_65-block_53-block_4-block_319-block_13-block_495-block_3-block_14-block_5-block_187-block_2…
NS_L1_80_Contig4612	#14	504	33	1.30084	21	21		DBLa0.16-CIDRa3.4-	block_67-block_114-block_63-block_104-block_23-block_68-block_6-block_350-
NS_L1_80_Contig5265	#14	3126	1526	9.69854	1	1		NTSpam-DBLpam1-DBLe11-DBLpam2-CIDRpam-	block_309-block_65-block_302-block_4-block_13-block_3-block_131-block_5-block_303-block_60-block_2-block_312-block_1-block_351-block_115-block_335-block_4-block_3-block_325-block_14-block_5-block_328-block_2-block_343-block_18-block_344-
NS_L1_80_Contig6705	#14	512	59	2.28941				DBLd1-	block_26-block_15-block_35-block_4-block_453-
NS_L1_80_Contig7091	#14	568	13	0.454711	1	1		DBLd1-DBLd1-	block_10-block_26-block_15-block_35-block_132-block_4-
NS_L1_80_Contig7398	#14	1036	771	14.7855
NS_L1_80_Contig7540	#14	3193	463	2.88086	8	2		NTSB-DBLa0.9-CIDRa6-DBLb5-	block_20-block_17-block_19-block_4-block_13-block_135-block_3-block_54-block_14-block_5-block_36-block_2-block_12-block_7-block_1-block_70-block_9-block_413-block_6-block_150-block_23-block_57-block_8-block_1-block_32-block_10-block_101-block_52-block_65-block_53-block_4-block_290-block_13-block_3-block_54-block_14-block_64-block_5-block_183-block_2-block_59-
NS_L1_80_Contig7900	#14	1247	125	1.99152	47	24		NTSA-DBLa1.1-	block_70-block_1-block_7-block_12-block_2-block_60-block_5-block_179-block_14-block_219-block_3-block_513-block_13-block_4-block_19-block_17-block_20-
NS_L1_80_Contig8145	#14	568	33	1.15427	2	2		DBLd1-	block_29-block_55-block_5-block_27-block_3-block_16-block_11-
NS_L1_80_Contig8258	#14	516	45	1.73262	5	5		DBLb9-DBLg4-	block_16-block_11-block_4-block_74-block_15-block_18-block_61-
NS_L1_80_Contig828	#14	4977	8896	35.5114	520	39		NTSA-DBLa1.1-CIDRa1.2-DBLb11-DBLg1-	block_264-block_20-block_17-block_19-block_4-block_13-block_513-block_3-block_219-block_14-block_179-block_5-block_60-block_2-block_12-block_7-block_1-block_70-block_9-block_536-block_6-block_150-block_23-block_57-block_8-block_1-block_121-block_10-block_141-block_65-block_53-block_4-block_189-block_13-block_234-block_3-block_457-block_14-block_5-block_605-block_183-block_2-block_59-block_604-blo…
NS_L1_80_Contig9056	#14	1764	169	1.90339	4	4		DBLa0.12-CIDRa2.4-	block_10-block_32-block_1-block_8-block_116-block_57-block_23-block_6-block_413-block_9-block_70-block_1-block_7-block_12-block_2-block_36-block_5-block_64-block_14-block_204-block_3-
NS_L1_80_Contig9354	#14	1790	125	1.38739	246	174		DBLg14-DBLz3-DBLe6-	block_18-block_318-block_4-block_3-block_587-block_14-block_5-block_92-block_2-block_99-block_1-block_62-block_93-block_18-block_124-block_76-
NS_L1_80_Contig9593	#14	516	362	13.938				NTSB-DBLa0.9-	block_4-block_19-block_17-block_20-
NS_L1_80_Contig9973	#14	920	56	1.20932	7			DBLb3-	block_13-block_3-block_174-block_14-block_5-block_259-block_2-block_59-block_1-block_62-block_61-
NS_L1_80_92869	#14	542	40	1.46623	5	5		DBLg3-	block_45-block_1-block_2-block_167-block_5-
NS_L1_80_93709	#14	564	33	1.16245	9	9		CIDRb1-	block_10-block_24-block_1-block_8-block_417-block_22-
NS_L1_80_94619	#14	589	34	1.14684	9	9		CIDRg6-	block_8-block_1-block_212-block_10-block_521-block_31-
NS_L1_80_97383	#14	681	214	6.2432				CIDRg10-	block_21-block_33-block_30-block_56-block_31-block_271-block_10-block_24-
NS_L1_80_97645	#14	692	561	16.1064	13	13		DBLa1.5-	block_3-block_54-block_14-block_179-block_5-block_60-block_2-block_12-block_7-block_1-block_151-
NS_L1_80_97713	#14	694	88	2.51921				DBLa0.13-CIDRa2.5-	block_143-block_6-block_75-block_9-block_34-block_239-block_1-block_7-block_12-block_2-
NS_L1_80_98277	#14	718	153	4.23358	1	1		DBLd1-CIDRg7-	block_8-block_83-block_22-block_571-block_85-block_103-block_6-block_483-block_9-block_122-block_1-
NS_L1_80_99863	#14	800	65	1.61423	14	14		DBLd4-CIDRd1-	block_202-block_6-block_9-block_1-block_7-block_12-block_2-block_167-block_5-
S_L7_20_Contig1109	#15	528	111	4.46679				DBLpam2-CIDRpam-	block_342-block_344-block_18-block_343-
S_L7_20_Contig1337	#15	1048	266	5.39296	10	8		DBLg2-	block_15-block_4-block_11-block_16-block_3-block_86-block_5-block_29-block_2-block_59-block_1-block_62-
S_L7_20_Contig1361	#15	1367	214	3.32623				DBLe3-	block_76-block_4-block_160-block_3-block_108-block_5-block_2-block_1-block_97-
S_L7_20_Contig1377	#15	667	27	0.860092	47	47		DBLz5-	block_14-block_5-block_489-block_92-block_2-block_403-block_1-block_430-block_115-
S_L7_20_Contig1711	#15	731	86	2.4997				CIDRb1-CIDRg1-	block_1-block_24-block_10-block_31-block_127-block_30-block_21-
S_L7_20_Contig1733	#15	1144	1053	19.5573				CIDRb1-	block_8-block_1-block_24-block_10-block_224-block_56-block_137-block_21-block_182-
S_L7_20_Contig1738	#15	1519	309	4.32223	10	4		CIDRg3-DBLb7-	block_10-block_101-block_52-block_65-block_408-block_53-block_4-block_515-block_13-block_266-block_3-block_174-block_14-block_5-block_400-block_2-block_59-block_1-block_62-block_61-
S_L7_20_Contig1741	#15	525	22	0.890369				CIDRa3.4-CIDRa2.11-	block_10-block_49-block_26-block_30-block_15-
S_L7_20_Contig1771	#15	1505	377	5.32245	35	4		CIDRd1-DBLb6-	block_8-block_621-block_1-block_617-block_24-block_10-block_101-block_52-block_65-block_190-block_53-block_4-block_13-block_3-block_544-block_14-block_5-block_625-
S_L7_20_Contig1807	#15	565	33	1.241	17	17		DBLb12-DBLg4-	block_61-block_18-block_612-block_15-block_74-block_4-block_11-block_16-
S_L7_20_Contig1812	#15	1333	374	5.9614	683	523	PfIT_070017200 PfGN01_070017900 PfGB4_070018200 PfDd2_070016500 PfHB3_070016100	NTSB-DBLa0.4-	block_378-block_20-block_17-block_19-block_4-block_13-block_416-block_3-block_54-block_14-block_556-block_5-block_36-block_2-
S_L7_20_Contig1828	#15	3509	1595	9.65793	75	6	PfGN01_140085000	DBLg14-DBLz3-DBLe12-	block_11-block_16-block_3-block_86-block_5-block_2-block_48-block_1-block_45-block_397-block_18-block_227-block_315-block_4-block_13-block_3-block_5-block_476-block_92-block_2-block_99-block_1-block_93-block_18-block_124-block_76-block_4-block_11-block_3-block_126-block_5-block_2-block_200-block_97-block_274-block_95-block_21-block_41-
S_L7_20_Contig1829	#15	580	22	0.805938	50	50		DBLz6-DBLe9-	block_18-block_124-block_76-block_4-block_11-block_3-block_108-block_5-
S_L7_20_Contig1832	#15	2375	557	4.98309	80	10		NTSA-DBLa1.7-CIDRa1.7-DBLb1-	block_20-block_17-block_19-block_4-block_13-block_3-block_54-block_14-block_5-block_60-block_2-block_12-block_7-block_1-block_70-block_9-block_399-block_6-block_150-block_23-block_57-block_8-block_1-block_121-block_368-block_10-block_141-block_52-
S_L7_20_Contig1836	#15	645	24	0.790603	2	2		DBLb8-DBLg9-	block_86-block_3-block_232-block_11-block_4-block_139-block_15-block_18-
S_L7_20_Contig19	#15	533	37	1.47496	1	1		DBLd1-	block_1-block_7-block_12-block_2-block_409-block_29-block_90-block_5-
S_L7_20_Contig1920	#15	1064	47	0.938562	8	3		DBLa0.12-CIDRa2.1-	block_7-block_1-block_70-block_9-block_6-block_181-block_23-block_57-block_526-block_8-block_1-block_32-
S_L7_20_Contig1956	#15	1885	176	1.98385				CIDRa2.4-CIDRa3.1-DBLg5-DBLd1-	block_10-block_26-block_15-block_4-block_11-block_16-block_3-block_86-block_5-block_167-block_2-block_136-block_1-block_258-block_45-block_257-block_30-block_15-block_35-
S_L7_20_Contig2018	#15	1027	3232	66.8664
S_L7_20_Contig2021	#15	1108	102	1.95599	20	12	PfSD01_100044400	CIDRb4-DBLg15-	block_8-block_1-block_24-block_10-block_26-block_15-block_4-block_11-block_16-block_3-block_98-block_5-
S_L7_20_Contig2024	#15	936	64	1.45282	412	302		DBLa1.3-DBLe8-	block_4-block_76-block_18-block_93-block_592-block_1-block_99-block_2-block_92-block_5-
S_L7_20_Contig2067	#15	4075	711	3.70722	207	70	PfSD01_060021500	NTSA-DBLa0.18-CIDRa2.1-DBLb2-DBLg10-	block_20-block_17-block_19-block_4-block_13-block_3-block_54-block_14-block_5-block_60-block_2-block_12-block_7-block_1-block_70-block_9-block_268-block_6-block_181-block_23-block_57-block_8-block_1-block_32-block_10-block_101-block_52-block_65-block_53-block_4-block_189-block_13-block_3-block_14-block_199-block_5-block_231-block_2-block_59-block_250-block_1-block_62-block_209-block_61-block_18-b…
S_L7_20_Contig2094	#15	899	66	1.55988	21	5		CIDRa2.5-DBLd1-	block_406-block_11-block_106-block_4-block_35-block_15-block_30-block_26-block_241-block_10-block_32-block_532-
S_L7_20_Contig2255	#15	768	67	1.85362				DBLb6-	block_5-block_14-block_174-block_3-block_13-block_520-block_4-block_53-block_65-block_52-block_101-
S_L7_20_Contig2378	#15	928	181	4.14417	2	2		DBLa0.5-CIDRa2.3-	block_2-block_12-block_7-block_1-block_34-block_9-block_118-block_6-block_143-block_23-block_57-block_223-block_8-
S_L7_20_Contig2512	#15	2811	1825	13.7946				CIDRa2.2-DBLd1-CIDRb1-	block_8-block_417-block_22-block_50-block_226-block_6-block_9-block_72-block_1-block_7-block_12-block_2-block_105-block_29-block_5-block_27-block_228-block_3-block_16-block_273-block_11-block_4-block_35-block_15-block_26-block_10-block_32-block_1-block_8-block_57-block_23-
S_L7_20_Contig2645	#15	519	263	10.767	106	106		DBLe6-	block_21-block_78-block_45-block_1-block_48-
S_L7_20_Contig2765	#15	598	173	6.14684	2	2		DBLd4-CIDRg12-	block_1-block_370-block_9-block_178-block_6-block_85-block_22-
S_L7_20_Contig2857	#15	558	46	1.75158	10	10		DBLa0.15-	block_14-block_64-block_5-block_36-block_163-block_2-block_12-block_7-block_1-
S_L7_20_Contig2951	#15	812	36	0.942005				CIDRa2.1-	block_23-block_57-block_116-block_8-block_1-block_32-block_10-block_52-
S_L7_20_Contig2977	#15	725	141	4.13226				DBLpam2-	block_343-block_2-block_328-block_5-block_14-block_325-block_3-
S_L7_20_Contig3007	#15	523	26	1.05628	70	70		DBLa0.1-	block_2-block_88-block_36-block_5-block_64-block_14-block_524-block_3-block_13-
S_L7_20_Contig3051	#15	1710	242	3.00695	1			DBLa0.19-CIDRa2.4-DBLd1-	block_492-block_34-block_9-block_118-block_6-block_23-block_57-block_8-block_1-block_32-block_10-block_26-block_30-block_15-block_35-block_4-block_507-block_157-
S_L7_20_Contig3072	#15	666	89	2.83937	20	20		DBLd1-	block_77-block_16-block_3-block_27-block_5-block_55-block_29-block_87-block_2-
S_L7_20_Contig3092	#15	2428	339	2.96659	2			NTSA-DBLa1.6-CIDRd1-	block_155-block_20-block_17-block_19-block_4-block_13-block_3-block_204-block_14-block_5-block_60-block_2-block_12-block_7-block_1-block_9-block_6-block_202-block_22-block_193-block_8-block_1-block_24-block_10-block_622-block_190-block_127-
S_L7_20_Contig3152	#15	2147	518	5.12631	2			NTSB-DBLa0.9-CIDRa2.1-	block_32-block_1-block_8-block_57-block_23-block_6-block_118-block_9-block_70-block_1-block_7-block_12-block_2-block_36-block_5-block_64-block_14-block_54-block_3-block_188-block_13-block_4-block_19-block_17-block_20-
S_L7_20_Contig3157	#15	705	11967	360.664
S_L7_20_Contig3179	#15	748	52	1.4771	2	2		DBLa1.7-CIDRa5-	block_6-block_23-block_57-block_8-block_1-block_32-
S_L7_20_Contig3188	#15	773	42	1.15445				DBLa0.22-CIDRa3.1-	block_67-block_339-block_63-block_23-block_68-block_6-block_75-block_9-block_34-
S_L7_20_Contig3202	#15	644	64	2.11155				CIDRg10-	block_607-block_24-block_10-block_31-block_56-block_21-
S_L7_20_Contig3209	#15	1164	4789	87.4176				DBLd1-CIDRb1-	block_9-block_496-block_6-block_243-block_50-block_22-block_107-block_8-block_1-block_24-block_10-block_10-block_491-block_31-block_56-
S_L7_20_Contig3225	#15	511	31	1.28898	3	3		DBLa0.12-	block_1-block_7-block_12-block_2-block_60-block_5-block_210-
S_L7_20_Contig3229	#15	728	63	1.83872	21	21		DBLd1-CIDRb1-	block_22-block_50-block_180-block_6-block_496-block_9-block_1-block_7-block_12-block_2-
S_L7_20_Contig3246	#15	529	18	0.722976	3	3		DBLa0.19-CIDRa2.3-	block_23-block_251-block_6-block_118-block_9-block_34-
S_L7_20_Contig3255	#15	1519	260	3.63683	5	2		DBLa0.1-CIDRa3.1-CIDRa3.1-DBLd1-	block_15-block_30-block_26-block_49-block_10-block_560-block_32-block_1-block_8-block_572-block_67-block_339-block_63-block_104-block_23-block_68-block_6-block_596-block_9-
S_L7_20_Contig3282	#15	592	16	0.574255	8	8		NTSB-DBLa0.21-	block_3-block_13-block_4-block_19-block_17-block_20-
S_L7_20_Contig3300	#15	844	62	1.56083	3	3		DBLd1-CIDRb1-	block_24-block_1-block_8-block_247-block_22-block_50-block_138-block_6-block_504-block_9-block_497-block_1-
S_L7_20_Contig3309	#15	723	30	0.881637				DBLb5-	block_5-block_146-block_3-block_13-block_4-block_53-block_65-
S_L7_20_Contig3319	#15	2441	5439	47.3433	8	6		DBLd1-CIDRb1-	block_21-block_137-block_56-block_31-block_10-block_24-block_1-block_8-block_22-block_50-block_6-block_9-block_72-block_1-block_7-block_12-block_2-block_94-block_90-block_5-block_27-block_253-block_3-block_16-block_77-block_11-block_4-block_35-
S_L7_20_Contig3323	#15	650	57	1.86324	8	8		NTSB-DBLa0.3-	block_20-block_17-block_19-block_4-block_13-block_3-block_204-
S_L7_20_Contig3327	#15	4433	1258	6.02962	119	9	PfGB4_040026000	DBLa0.1-CIDRa3.1-DBLd1-CIDRb1-	block_21-block_137-block_56-block_31-block_10-block_24-block_1-block_8-block_22-block_50-block_180-block_6-block_298-block_9-block_497-block_1-block_7-block_12-block_2-block_87-block_29-block_5-block_27-block_156-block_3-block_16-block_11-block_4-block_35-block_15-block_30-block_26-block_49-block_10-block_32-block_1-block_8-block_67-block_114-block_63-block_104-block_23-block_68-block_6-block_75-…
S_L7_20_Contig3328	#15	2511	315	2.66545	6			CIDRa3.2-DBLd1-CIDRg4-	block_10-block_506-block_30-block_15-block_35-block_4-block_165-block_11-block_16-block_3-block_437-block_27-block_5-block_249-block_2-block_12-block_7-block_1-block_122-block_9-block_178-block_6-block_103-block_85-block_22-block_83-block_8-
S_L7_20_Contig3329	#15	1138	77	1.43766	1			CIDRa2.5-CIDRa3.1-DBLd1-	block_32-block_10-block_114-block_30-block_15-block_35-block_4-block_11-block_289-block_16-block_3-
S_L7_20_Contig3332	#15	2357	287	2.5872	6	3		CIDRa3.3-DBLd1-CIDRg9-	block_168-block_10-block_49-block_30-block_15-block_35-block_34-block_4-block_11-block_158-block_16-block_3-block_437-block_177-block_27-block_5-block_29-block_105-block_2-block_12-block_7-block_1-block_122-block_9-block_178-block_6-block_148-block_22-
S_L7_20_Contig3344	#15	1219	814	14.1882				NTSB-DBLa0.5-	block_439-block_20-block_17-block_19-block_4-block_13-block_215-block_3-block_79-block_14-block_64-block_5-block_36-block_88-block_2-block_12-block_7-
S_L7_20_Contig3345	#15	4169	11638	59.3135				NTSB-DBLa0.8-CIDRa5-CIDRa3.1-DBLd1-	block_20-block_17-block_19-block_4-block_13-block_494-block_3-block_171-block_14-block_64-block_5-block_36-block_88-block_2-block_12-block_7-block_1-block_34-block_9-block_75-block_6-block_23-block_57-block_8-block_1-block_32-block_10-block_49-block_26-block_30-block_15-block_35-block_34-block_4-block_157-block_165-block_11-block_109-block_16-block_3-block_510-block_419-block_27-block_5-block_55-…
S_L7_20_Contig3354	#15	721	20	0.589388	3			NTSA-DBLa1.2-	block_264-block_20-block_17-block_19-block_4-block_13-block_464-block_3-block_486-
S_L7_20_Contig3355	#15	792	47	1.2609				CIDRa2.8-CIDRa3.3-DBLd1-	block_15-block_30-block_26-block_241-block_10-block_372-block_32-block_1-
S_L7_20_Contig3361	#15	2778	1401	10.7155	1			NTSB-DBLa0.12-CIDRa2.7-DBLd1-	block_35-block_15-block_332-block_26-block_49-block_10-block_32-block_1-block_8-block_116-block_57-block_23-block_438-block_6-block_9-block_70-block_1-block_7-block_12-block_2-block_88-block_36-block_5-block_64-block_14-block_54-block_3-block_13-block_4-block_19-block_17-block_20-
S_L7_20_Contig3368	#15	774	400	10.9806				DBLd1-CIDRb1-	block_1-block_72-block_9-block_6-block_173-block_50-block_22-block_159-block_8-
S_L7_20_Contig3376	#15	814	479	12.5031				CIDRb1-CIDRa3.3-CIDRa3.1-	block_8-block_1-block_24-block_10-block_31-block_26-block_341-block_295-
S_L7_20_Contig3378	#15	828	72	1.8476	2	2		DBLb5-	block_61-block_62-block_1-block_382-block_59-block_2-block_5-block_14-block_146-block_3-
S_L7_20_Contig3387	#15	1863	413	4.71025	1			DBLa0.22-CIDRa3.2-DBLd1-	block_35-block_15-block_530-block_26-block_10-block_32-block_1-block_8-block_333-block_288-block_63-block_23-block_68-block_6-block_75-block_9-block_1-block_7-block_12-
S_L7_20_Contig3391	#15	2040	166	1.72896	15	12		CIDRa4-DBLb5-DBLd4-	block_77-block_11-block_4-block_74-block_15-block_18-block_61-block_62-block_119-block_1-block_59-block_2-block_5-block_14-block_146-block_3-block_234-block_13-block_278-block_4-block_53-block_65-block_52-block_347-block_10-block_32-
S_L7_20_Contig3392	#15	1000	192	4.07951	11	4		CIDRg1-	block_21-block_33-block_56-block_31-block_207-block_10-block_24-block_1-block_8-block_522-
S_L7_20_Contig3400	#15	1815	299	3.50027	44	1		DBLb1-DBLg2-DBLg4-	block_255-block_61-block_18-block_15-block_286-block_4-block_11-block_3-block_82-block_5-block_133-block_2-block_59-block_1-block_62-block_61-block_18-block_15-block_74-block_4-block_11-block_16-block_3-
S_L7_20_Contig3401	#15	1283	128	2.11978	21	10		DBLa1.4-CIDRa1.7-	block_121-block_1-block_8-block_57-block_23-block_150-block_6-block_9-block_70-block_1-block_7-block_12-block_2-
S_L7_20_Contig3408	#15	4218	652	3.28434	14			DBLd1-CIDRg2-DBLz6-DBLe6-	block_55-block_29-block_87-block_2-block_12-block_7-block_1-block_370-block_9-block_178-block_6-block_477-block_85-block_22-block_8-block_1-block_24-block_10-block_31-block_52-block_235-block_53-block_4-block_13-block_385-block_3-block_429-block_14-block_5-block_291-block_92-block_2-block_99-block_1-block_592-block_93-block_18-block_124-block_76-block_4-block_11-block_3-block_108-block_5-block_14…
S_L7_20_Contig341	#15	4112	822	4.24742	36			DBLb5-DBLg6-DBLd1-CIDRb1-	block_5-block_589-block_2-block_59-block_1-block_62-block_396-block_61-block_18-block_15-block_286-block_4-block_11-block_16-block_3-block_82-block_5-block_133-block_427-block_2-block_136-block_1-block_45-block_257-block_28-block_49-block_30-block_530-block_15-block_35-block_4-block_11-block_273-block_16-block_3-block_437-block_177-block_27-block_5-block_55-block_29-block_87-block_2-block_12-bloc…
S_L7_20_Contig3410	#15	2623	1019	8.25435	4			DBLa0.1-CIDRa4-DBLd1-	block_12-block_7-block_1-block_34-block_9-block_186-block_6-block_68-block_23-block_104-block_63-block_67-block_8-block_1-block_32-block_10-block_30-block_15-block_35-block_4-block_11-block_289-block_16-block_3-block_437-block_177-block_27-block_5-block_55-block_29-block_87-block_2-
S_L7_20_Contig3412	#15	5987	1735	6.1574	399	21	PfIT_050037800 PfDd2_050037600 PfSD01_050037500	DBLg1-DBLe1-DBLg8-DBLz2-DBLe5-	block_3-block_86-block_5-block_94-block_2-block_364-block_1-block_352-block_583-block_11-block_353-block_3-block_260-block_5-block_380-block_2-block_48-block_1-block_45-block_18-block_551-block_15-block_74-block_4-block_11-block_16-block_3-block_82-block_5-block_133-block_2-block_48-block_1-block_45-block_18-block_318-block_4-block_13-block_3-block_14-block_5-block_275-block_92-block_2-block_99-b…
S_L7_20_Contig3413	#15	4034	1472	7.75316	233	20	PfSD01_100044400	DBLg15-DBLe1-DBLz3-DBLe6-	block_3-block_27-block_5-block_96-block_2-block_364-block_1-block_352-block_4-block_11-block_3-block_260-block_5-block_2-block_48-block_1-block_45-block_18-block_318-block_4-block_3-block_587-block_14-block_5-block_92-block_2-block_99-block_1-block_62-block_93-block_18-block_124-block_76-block_4-block_3-block_5-block_213-block_2-block_48-
S_L7_20_Contig3482	#15	1793	703	8.33071	31			DBLb12-DBLg4-	block_11-block_4-block_74-block_15-block_18-block_61-block_255-block_62-block_1-block_59-block_2-block_183-block_470-block_5-block_14-block_146-block_3-block_13-block_290-block_4-block_53-block_65-
S_L7_20_Contig368	#15	1389	145	2.21806	1			CIDRg3-DBLb7-	block_10-block_101-block_52-block_17-block_53-block_4-block_278-block_13-block_3-block_174-block_14-block_5-block_2-block_59-block_1-block_614-
S_L7_20_Contig3681	#15	1684	239	3.01552	8	7		DBLpam1-DBLpam2-	block_13-block_3-block_501-block_131-block_5-block_303-block_60-block_2-block_312-block_1-block_351-block_115-block_335-block_4-block_13-block_3-
S_L7_20_Contig3922	#15	4323	871	4.28095	897		PF3D7_0402800 PfIT_040007200	DBLb3-DBLe1-DBLe4-DBLe7-	block_65-block_53-block_4-block_13-block_3-block_544-block_14-block_5-block_380-block_2-block_48-block_45-block_18-block_28-block_81-block_463-block_11-block_5-block_2-block_200-block_97-block_21-block_41-block_43-block_140-block_42-block_112-block_39-
S_L7_20_Contig3956	#15	1317	854	13.7778	83	1	PfCD01_120005700	DBLpam3-DBLepam4-	block_329-block_4-block_307-block_484-block_3-block_314-block_5-block_313-block_2-block_306-block_428-block_1-block_305-block_4-block_401-block_11-
S_L7_20_Contig405	#15	1445	94	1.38219	15	14		DBLa1.5-CIDRg3-	block_5-block_60-block_2-block_12-block_7-block_1-block_9-block_6-block_148-block_22-block_176-block_8-block_1-block_24-block_10-
S_L7_20_Contig4214	#15	534	36	1.43241	2	2		DBLa0.22-CIDRa3.1-	block_23-block_68-block_6-block_245-block_75-block_9-block_34-block_239-block_1-
S_L7_20_Contig4282	#15	597	30	1.06771	3	3		DBLa0.15-CIDRa3.2-	block_7-block_1-block_184-block_9-block_118-block_6-block_68-block_23-
S_L7_20_Contig4330_manual_selection	#15	1180	492	8.85911	626	561	PF3D7_0712600		block_218-block_42-block_112-block_39-block_285-block_40-block_38-block_44-block_46-block_69-block_191-block_47-block_51-
S_L7_20_Contig4344	#15	525	42	1.6998	54	54		DBLa0.1-	block_2-block_88-block_36-block_5-block_64-block_14-block_79-block_3-block_13-
S_L7_20_Contig4614	#15	1683	14691	185.47	9			DBLd4-CIDRg2-	block_21-block_33-block_221-block_24-block_1-block_8-block_176-block_22-block_85-block_477-block_6-block_178-block_9-block_122-block_1-block_7-block_12-
S_L7_20_Contig4870	#15	623	38	1.29599	1	1		DBLa0.15-	block_6-block_9-block_34-block_1-block_7-block_12-block_2-block_88-
S_L7_20_Contig4879	#15	1523	197	2.74836	1			DBLd1-CIDRb1-	block_2-block_12-block_7-block_1-block_72-block_9-block_6-block_50-block_22-block_555-block_8-block_1-block_24-block_10-block_606-block_31-block_56-
S_L7_20_Contig4920	#15	884	98	2.35549				DBLd1-	block_4-block_73-block_11-block_16-block_3-block_359-block_27-block_5-block_29-block_105-
S_L7_20_Contig4938	#15	3037	439	3.07133	21	1		DBLa0.1-CIDRa3.1-DBLd1-CIDRb4-	block_9-block_75-block_6-block_68-block_23-block_104-block_63-block_288-block_67-block_572-block_8-block_1-block_32-block_125-block_10-block_101-block_30-block_15-block_35-block_4-block_81-block_11-block_77-block_16-block_3-block_27-block_5-block_2-block_12-block_7-block_1-block_9-block_6-
S_L7_20_Contig5009	#15	542	22	0.862443	8	8		DBLd1-CIDRb7-	block_50-block_138-block_6-block_9-block_72-block_1-block_7-
S_L7_20_Contig5088	#15	621	54	1.8476				DBLd3-	block_12-block_2-block_167-block_5-block_3-block_16-block_127-block_11-
S_L7_20_Contig5096	#15	3820	1166	6.48548	25			NTSB-DBLa0.5-CIDRa2.3-DBLd1-	block_20-block_17-block_19-block_4-block_13-block_3-block_79-block_14-block_64-block_5-block_36-block_153-block_2-block_12-block_7-block_1-block_239-block_34-block_9-block_75-block_6-block_143-block_23-block_57-block_8-block_1-block_32-block_10-block_26-block_30-block_15-block_35-block_4-block_165-block_11-block_109-block_16-block_3-block_27-block_5-block_29-block_105-block_2-
S_L7_20_Contig5132	#15	6276	1501	5.08165	41			DBLa1.2-CIDRa1.6-DBLb12-DBLg6-DBLd1-	block_3-block_54-block_14-block_5-block_60-block_2-block_12-block_7-block_1-block_70-block_9-block_399-block_6-block_150-block_23-block_57-block_8-block_1-block_121-block_368-block_10-block_141-block_52-block_65-block_4-block_13-block_3-block_174-block_14-block_5-block_187-block_2-block_59-block_1-block_614-block_62-block_61-block_18-block_190-block_26-block_15-block_74-block_4-block_11-block_16-…
S_L7_20_Contig5156	#15	544	68	2.65593	36	36		CIDRa1.4-DBLb3-	block_4-block_53-block_65-block_52-block_141-block_10-block_368-
S_L7_20_Contig5168	#15	506	42	1.76362					block_10-block_195-block_31-block_127-block_33-block_21-
S_L7_20_Contig5170	#15	509	1028	42.9123	7	7		CIDRb6-	block_6-block_243-block_50-block_22-block_172-block_8-
S_L7_20_Contig5173	#15	515	100	4.12572	1	1		DBLd1-CIDRb5-	block_496-block_6-block_173-block_50-block_22-block_172-block_8-
S_L7_20_Contig5178	#15	518	95	3.89673	3	3		DBLb3-	block_65-block_53-block_4-block_13-block_3-block_174-
S_L7_20_Contig5182	#15	601	80	2.82828	6	6		CIDRg4-	block_31-block_10-block_24-block_1-block_8-block_83-
S_L7_20_Contig5183	#15	522	33	1.34323	1	1		DBLb1-	block_62-block_61-block_18-block_28-block_331-
S_L7_20_Contig5185	#15	624	30	1.02151				DBLd1-	block_27-block_3-block_16-block_158-block_11-block_73-block_4-block_35-
S_L7_20_Contig5186	#15	528	26	1.04628	1	1		DBLa0.9-	block_9-block_70-block_1-block_7-block_12-block_2-block_36-
S_L7_20_Contig5189	#15	531	17	0.680239				DBLa0.22-CIDRa3.1-	block_68-block_6-block_245-block_75-block_9-block_34-block_492-block_1-
S_L7_20_Contig5192	#15	539	319	12.575				DBLd1-	block_3-block_185-block_27-block_5-block_55-block_29-block_105-block_2-
S_L7_20_Contig5200	#15	628	21	0.710504	3	3		CIDRb1-	block_56-block_31-block_10-block_24-block_1-block_8-
S_L7_20_Contig5202	#15	551	153	5.89993				DBLd1-	block_2-block_87-block_29-block_448-block_55-block_5-block_27-block_156-block_3-
S_L7_20_Contig5207	#15	556	36	1.37573	64	64		NTSA-DBLa1.2-	block_3-block_13-block_4-block_19-block_17-
S_L7_20_Contig5208	#15	634	29	0.971887	3	3		NTSB-DBLa0.19-	block_3-block_215-block_13-block_4-block_19-block_17-block_20-block_71-
S_L7_20_Contig5210	#15	574	35	1.29558				NTSpam-DBLpam1-	block_309-block_65-block_302-block_4-block_13-
S_L7_20_Contig5211	#15	565	31	1.16579	208	208		DBLe8-	block_142-block_2-block_200-block_97-
S_L7_20_Contig5212	#15	683	52	1.61767	8	8		DBLd4-CIDRg4-	block_8-block_83-block_22-block_85-block_103-block_6-block_483-block_9-block_122-block_1-
S_L7_20_Contig5216	#15	569	43	1.60569	50	50		DBLb3-	block_54-block_14-block_64-block_5-block_297-block_2-block_59-block_1-block_119-
S_L7_20_Contig5217	#15	589	2852	102.882				CIDRb5-	block_10-block_31-block_56-block_33-block_21-
S_L7_20_Contig5219	#15	571	86	3.20014	1	1		DBLa0.9-CIDRa2.1-	block_8-block_57-block_23-block_6-block_9-
S_L7_20_Contig5223	#15	579	70	2.56878	8	8		CIDRg7-	block_8-block_1-block_24-block_10-block_31-
S_L7_20_Contig5230	#15	589	99	3.5713	14	14		DBLb13-DBLg16-	block_61-block_18-block_557-block_15-block_4-block_11-block_16-block_3-
S_L7_20_Contig5231	#15	589	27	0.973992	1	1		DBLa0.14-CIDRa5-	block_1-block_70-block_9-block_6-block_150-block_23-block_57-
S_L7_20_Contig5236	#15	601	80	2.82828	1	1		DBLa0.16-CIDRa3.1-	block_23-block_68-block_6-block_348-block_9-block_34-block_239-block_1-block_7-
S_L7_20_Contig5237	#15	604	15	0.527669				DBLd1-	block_55-block_5-block_27-block_358-block_3-block_256-block_158-
S_L7_20_Contig5241	#15	756	77	2.16409	25	1		DBLd1-	block_5-block_27-block_177-block_437-block_3-block_16-block_77-block_11-block_4-block_435-block_35-
S_L7_20_Contig5244	#15	613	50	1.73307	2	2		DBLa0.11-CIDRa2.2-	block_8-block_57-block_23-block_181-block_6-block_118-block_9-block_70-
S_L7_20_Contig5246	#15	616	59	2.03506	7	7		DBLd1-CIDRb1-	block_9-block_6-block_138-block_50-block_22-block_417-block_8-block_1-
S_L7_20_Contig5249	#15	864	88	2.16409				CIDRa3.1-DBLd1-	block_32-block_372-block_10-block_26-block_15-block_35-block_4-block_165-
S_L7_20_Contig5255	#15	1153	109	2.00865				CIDRa3.4-DBLd1-	block_334-block_32-block_10-block_26-block_30-block_15-block_35-block_4-block_106-block_11-block_109-block_16-block_3-block_359-
S_L7_20_Contig5257	#15	671	80	2.53323	84	84		DBLa1.1-	block_13-block_3-block_402-block_14-block_5-block_60-block_2-block_12-block_7-
S_L7_20_Contig5264	#15	671	91	2.88155				CIDRg10-	block_1-block_607-block_24-block_10-block_195-block_31-block_56-block_95-
S_L7_20_Contig5267	#15	7537	6898	19.4461	23	2		NTSB-DBLa2-CIDRa1.1-DBLb12-DBLb5-CIDRa3.4-DBLd1-CIDRb7-	block_50-block_243-block_6-block_9-block_1-block_7-block_12-block_2-block_442-block_29-block_55-block_5-block_452-block_252-block_3-block_16-block_273-block_11-block_81-block_4-block_132-block_35-block_15-block_26-block_18-block_61-block_209-block_62-block_119-block_1-block_59-block_400-block_5-block_14-block_146-block_3-block_495-block_13-block_4-block_53-block_65-block_347-block_18-block_61-blo…
S_L7_20_Contig5269	#15	683	97	3.01757				DBLb5-	block_5-block_2-block_59-block_1-block_62-block_61-block_18-
S_L7_20_Contig5270	#15	688	60	1.85298				CIDRg5-	block_24-block_10-block_195-block_31-block_137-block_28-block_21-
S_L7_20_Contig5271	#15	689	51	1.57274	21	21		DBLd1-CIDRb6-	block_2-block_12-block_7-block_1-block_72-block_9-block_6-block_138-block_50-block_22-
S_L7_20_Contig5274	#15	3169	526	3.52672	100	51		CIDRg2-DBLg17-DBLz4-	block_10-block_31-block_15-block_139-block_4-block_11-block_16-block_3-block_82-block_5-block_133-block_2-block_136-block_1-block_45-block_78-block_318-block_4-block_13-block_462-block_3-block_387-block_14-block_5-block_284-block_92-block_2-block_99-block_1-block_283-block_93-block_18-block_280-block_21-block_41-block_128-block_43-
S_L7_20_Contig5276	#15	697	46	1.40227	4	4		DBLa0.5-CIDRa2.6-	block_1-block_34-block_9-block_75-block_6-block_143-block_23-block_154-block_63-
S_L7_20_Contig5278	#15	3113	914	6.23841				NTSB-DBLa0.19-CIDRa2.2-CIDRa3.1-DBLd1-	block_71-block_20-block_17-block_19-block_4-block_13-block_494-block_3-block_54-block_14-block_64-block_5-block_36-block_153-block_2-block_12-block_7-block_1-block_184-block_9-block_118-block_6-block_23-block_57-block_8-block_1-block_32-block_10-block_26-block_30-block_15-block_35-block_4-block_165-block_11-block_77-block_16-block_3-
S_L7_20_Contig5281	#15	720	839	24.7592	7	7		CIDRb5-	block_31-block_271-block_10-block_24-block_1-block_8-block_107-block_22-block_50-
S_L7_20_Contig5282	#15	766	70	1.94167	4	4		DBLa0.8-	block_19-block_4-block_13-block_3-block_171-block_14-block_64-block_5-block_36-block_153-block_2-
S_L7_20_Contig5283	#15	726	54	1.58039	1	1		DBLb1-	block_61-block_255-block_62-block_119-block_1-block_59-block_2-block_183-block_5-
S_L7_20_Contig5284	#15	726	65	1.90232	1	1		DBLd1-CIDRb6-	block_1-block_9-block_6-block_243-block_50-block_22-block_172-block_8-
S_L7_20_Contig5286	#15	800	462	12.2704				CIDRb1-	block_8-block_1-block_24-block_10-block_31-block_127-block_33-block_21-
S_L7_20_Contig5287	#15	738	57	1.64106	1	1		DBLd1-	block_1-block_7-block_12-block_2-block_619-block_29-block_55-block_5-block_27-block_3-
S_L7_20_Contig5289	#15	739	83	2.38639				CIDRa2.1-DBLd1-	block_106-block_4-block_35-block_15-block_26-block_10-
S_L7_20_Contig5290	#15	739	56	1.61009	1	1		DBLa0.12-CIDRa3.2-	block_8-block_67-block_110-block_63-block_480-block_23-block_68-block_6-block_118-block_9-block_70-
S_L7_20_Contig5293	#15	748	39	1.10782				DBLd1-CIDRg5-	block_2-block_12-block_7-block_1-block_122-block_9-block_178-block_6-block_103-block_85-block_22-
S_L7_20_Contig5294	#15	754	79	2.22619	10	8		NTSB-DBLa0.10-	block_14-block_54-block_3-block_233-block_13-block_4-block_19-block_17-block_20-block_71-
S_L7_20_Contig5298	#15	767	595	16.4827				DBLd4-CIDRg10-	block_8-block_83-block_22-block_85-block_103-block_6-block_9-block_122-block_1-
S_L7_20_Contig5299	#15	776	199	5.44877	46	41		DBLg4-	block_16-block_3-block_82-block_5-block_133-block_2-block_99-block_1-block_45-
S_L7_20_Contig5300	#15	780	2709	73.794	1	1		CIDRb1-CIDRa3.1-	block_295-block_341-block_157-block_205-block_56-block_31-block_10-block_24-block_1-
S_L7_20_Contig5302	#15	801	55	1.45894				DBLd1-	block_15-block_35-block_435-block_4-block_11-block_109-block_16-block_3-block_27-block_5-block_301-block_29-
S_L7_20_Contig5305	#15	814	216	5.63814	1			CIDRb1-CIDRa3.1-	block_295-block_341-block_26-block_205-block_56-block_31-block_374-block_10-block_24-block_1-block_8-
S_L7_20_Contig5309	#15	828	460	11.8041	4	3		DBLd1-CIDRb1-	block_107-block_22-block_50-block_180-block_6-block_504-block_9-block_72-block_1-block_7-block_12-block_2-
S_L7_20_Contig5311	#15	833	448	11.4272	3	3		DBLb9-DBLg4-	block_187-block_2-block_59-block_1-block_62-block_61-block_18-block_15-block_74-block_4-block_11-
S_L7_20_Contig5315	#15	990	75	1.60966				CIDRa3.1-DBLd3-	block_4-block_35-block_15-block_30-block_26-block_49-block_10-block_32-block_1-block_8-
S_L7_20_Contig5317	#15	860	45	1.11179	16			NTSB-DBLa0.23-	block_439-block_20-block_17-block_19-block_4-block_13-block_188-block_3-block_386-block_14-block_5-
S_L7_20_Contig5321	#15	870	911	22.2488	6	6		DBLg4-	block_11-block_3-block_82-block_5-block_133-block_2-block_1-block_45-
S_L7_20_Contig5322	#15	871	19	0.463492	34	13		DBLa1.1-CIDRa1.4-	block_70-block_9-block_6-block_150-block_23-block_57-block_8-block_1-block_121-
S_L7_20_Contig5323	#15	874	102	2.47968	3	3		DBLd1-CIDRb1-	block_159-block_22-block_50-block_180-block_6-block_298-block_9-block_72-block_1-block_7-block_12-block_2-block_105-block_29-
S_L7_20_Contig5324	#15	883	140	3.36879	5	5		CIDRa3.1-	block_68-block_23-block_104-block_63-block_110-block_67-block_8-block_1-block_512-block_32-block_125-block_10-
S_L7_20_Contig5325	#15	1763	315	3.79634	1			DBLa0.5-CIDRa2.6-	block_19-block_4-block_13-block_135-block_3-block_54-block_14-block_5-block_36-block_163-block_2-block_12-block_7-block_1-block_320-block_184-block_9-block_75-block_6-block_143-block_23-block_154-block_63-block_116-block_8-block_472-
S_L7_20_Contig5326	#15	951	191	4.26736	1			DBLa1.1-CIDRa1.4-DBLb12-	block_6-block_150-block_23-block_57-block_8-block_1-block_121-block_368-block_10-block_141-block_52-
S_L7_20_Contig5327	#15	896	61	1.44653				CIDRg10-	block_21-block_95-block_33-block_56-block_31-block_10-block_24-block_1-
S_L7_20_Contig5328	#15	900	230	5.4299				CIDRb1-	block_6-block_243-block_50-block_22-block_417-block_8-block_1-block_456-block_24-block_10-block_195-block_31-
S_L7_20_Contig5330	#15	906	117	2.74388	4	2		CIDRa1.4-DBLb1-	block_121-block_10-block_141-block_52-block_65-block_4-block_319-block_13-block_3-block_317-
S_L7_20_Contig5331	#15	911	662	15.44	3	2		DBLd7-CIDRb1-	block_24-block_1-block_8-block_107-block_22-block_50-block_138-block_6-block_9-block_72-
S_L7_20_Contig5332	#15	926	608	13.9508				DBLd1-	block_1-block_7-block_12-block_2-block_105-block_29-block_249-block_5-block_27-block_3-block_16-block_77-block_11-
S_L7_20_Contig5334	#15	975	114	2.48432				CIDRa2.3-DBLd2-DBLd1-	block_8-block_1-block_32-block_10-block_241-block_26-block_30-block_15-block_35-block_4-
S_L7_20_Contig5335	#15	949	65	1.4553	1	1		DBLd1-	block_4-block_81-block_11-block_77-block_16-block_3-block_185-block_5-block_55-block_29-block_442-block_2-block_12-block_7-
S_L7_20_Contig5337	#15	972	155	3.38823	14	4		CIDRb6-	block_50-block_22-block_172-block_8-block_1-block_24-block_10-block_195-block_31-block_56-block_137-
S_L7_20_Contig5338	#15	976	41	0.892567				DBLa0.4-	block_1-block_7-block_130-block_2-block_36-block_5-block_179-block_14-block_204-block_3-block_13-block_4-block_19-
S_L7_20_Contig5339	#15	979	61	1.3239	42	37		CIDRa1.1-DBLb11-	block_54-block_3-block_13-block_4-block_65-block_52-block_141-block_10-block_450-block_121-block_1-
S_L7_20_Contig5340	#15	2218	302	2.89303	5	2		DBLg13-DBLd1-	block_5-block_29-block_2-block_48-block_1-block_45-block_18-block_15-block_35-block_132-block_4-block_106-block_11-block_289-block_16-block_3-block_253-block_27-block_5-block_55-block_29-block_2-block_12-block_7-block_1-block_6-
S_L7_20_Contig5341	#15	994	75	1.60318	10	7		CIDRa3.2-CIDRa3.1-DBLd1-	block_1-block_512-block_32-block_10-block_49-block_26-block_30-block_15-block_35-block_4-block_81-
S_L7_20_Contig5342	#15	1056	389	7.82695	8			DBLb1-DBLb3-	block_174-block_3-block_13-block_4-block_53-block_65-block_52-block_101-block_18-block_61-block_255-block_62-
S_L7_20_Contig5343	#15	1007	165	3.48146				NTSB-DBLa0.1-	block_20-block_17-block_19-block_4-block_13-block_3-block_446-block_14-block_345-block_5-block_36-block_88-block_2-
S_L7_20_Contig5345	#15	1051	70	1.41515	3			NTSB-DBLa0.1-	block_20-block_17-block_19-block_4-block_13-block_102-block_3-block_79-block_14-block_64-block_5-block_36-block_153-block_2-
S_L7_20_Contig5346	#15	3657	1004	5.83332	5			NTSB-DBLa0.10-CIDRa2.2-DBLd1-	block_20-block_17-block_19-block_4-block_13-block_233-block_3-block_14-block_64-block_5-block_36-block_2-block_12-block_7-block_1-block_70-block_9-block_118-block_6-block_23-block_154-block_57-block_8-block_1-block_32-block_10-block_26-block_30-block_15-block_35-block_4-block_11-block_109-block_16-block_3-block_27-block_5-block_55-block_448-block_29-block_105-block_2-
S_L7_20_Contig5347	#15	4140	3495	17.9372	5			NTSB-DBLa0.12-CIDRa2.1-CIDRa3.1-DBLd1-	block_194-block_20-block_17-block_19-block_4-block_13-block_3-block_54-block_14-block_161-block_5-block_36-block_163-block_2-block_12-block_7-block_1-block_70-block_9-block_6-block_23-block_57-block_223-block_8-block_1-block_32-block_10-block_26-block_26-block_30-block_15-block_35-block_4-block_469-block_73-block_11-block_158-block_16-block_3-block_573-block_27-block_5-block_55-block_29-block_105…
S_L7_20_Contig5352	#15	1328	198	3.16792				NTSB-DBLa0.14-	block_20-block_17-block_19-block_4-block_13-block_102-block_3-block_54-block_14-block_64-block_5-block_36-block_163-block_2-block_130-block_7-block_1-
S_L7_20_Contig5353	#15	1128	1279	24.0917	6			DBLd4-CIDRg7-	block_459-block_10-block_1-block_8-block_83-block_22-block_85-block_103-block_6-block_178-block_9-block_122-block_1-
S_L7_20_Contig5354	#15	1131	79	1.48413	14			NTSB-DBLa0.5-	block_20-block_17-block_19-block_4-block_13-block_3-block_54-block_14-block_64-block_5-block_36-block_163-block_2-block_12-block_7-
S_L7_20_Contig5355	#15	1455	1619	23.6424	13			DBLg10-	block_182-block_182-block_21-block_355-block_18-block_45-block_1-block_579-block_59-block_2-block_29-block_5-block_86-block_3-block_16-block_11-
S_L7_20_Contig5356	#15	1155	265	4.87496	8			DBLa0.9-CIDRa2.2-	block_23-block_438-block_6-block_348-block_9-block_184-block_1-block_7-block_12-block_2-block_36-block_5-block_14-block_54-block_3-block_102-block_13-
S_L7_20_Contig5357	#15	2146	922	9.12868			PfCD01_030007800 PfHB3_030006200 PfIT_030007200 PfDd2_030007400 PF3D7_0302300 PfSD01_030007500 PfKH01_030007300 PfGN01_030008000 PfKH02_030007900		block_346-block_346-
S_L7_20_Contig5358	#15	1197	233	4.13589				DBLd1-	block_11-block_77-block_16-block_3-block_27-block_5-block_55-block_29-block_198-block_2-block_12-block_7-block_1-block_497-block_9-block_244-block_6-
S_L7_20_Contig5360	#15	1268	1228	20.5772	16	1		DBLb9-DBLg11-	block_45-block_1-block_48-block_2-block_167-block_90-block_5-block_86-block_3-block_16-block_11-block_4-block_74-block_15-block_612-block_18-block_61-
S_L7_20_Contig5361	#15	2740	791	6.13384	1			DBLa0.11-CIDRa2.2-DBLd1-	block_1-block_7-block_12-block_2-block_105-block_29-block_55-block_324-block_5-block_27-block_253-block_3-block_16-block_11-block_165-block_4-block_35-block_15-block_506-block_10-block_32-block_1-block_8-block_57-block_23-block_438-block_6-block_9-block_70-block_1-
S_L7_20_Contig5362	#15	1297	180	2.94876	1	1		NTSB-DBLa0.16-	block_20-block_17-block_19-block_4-block_13-block_381-block_3-block_79-block_14-block_64-block_5-block_36-block_163-block_2-block_12-block_7-
S_L7_20_Contig5363	#15	1312	122	1.97575				DBLa0.10-CIDRa2.2-DBLd1-	block_118-block_6-block_251-block_23-block_57-block_626-block_8-block_1-block_32-block_10-block_49-block_26-block_30-block_15-block_35-block_4-
S_L7_20_Contig5364	#15	1320	101	1.62575	1	1		DBLa0.9-CIDRa4-	block_19-block_4-block_13-block_3-block_54-block_14-block_64-block_5-block_36-block_2-block_12-block_7-block_1-block_70-block_9-block_118-block_6-
S_L7_20_Contig5365	#15	1345	60	0.947842	3	1		DBLa0.12-CIDRa2.2-DBLd1-	block_4-block_35-block_15-block_30-block_101-block_10-block_32-block_1-block_8-block_57-block_23-block_251-block_6-block_118-block_9-
S_L7_20_Contig5366	#15	1359	555	8.67722				CIDRa3.4-DBLd1-	block_8-block_1-block_299-block_32-block_10-block_26-block_30-block_15-block_35-block_4-block_81-block_11-block_237-block_16-block_3-
S_L7_20_Contig5367	#15	1431	245	3.63775	3			DBLa0.8-CIDRa3.5-	block_13-block_215-block_3-block_54-block_14-block_64-block_5-block_36-block_2-block_12-block_7-block_1-block_184-block_9-block_75-block_6-block_68-block_23-block_63-block_8-
S_L7_20_Contig5368	#15	1520	319	4.45917	11			DBLa0.20-CIDRa3.1-	block_2-block_130-block_7-block_1-block_34-block_9-block_75-block_6-block_68-block_23-block_104-block_63-block_114-block_67-block_8-block_1-block_512-block_32-block_125-block_10-
S_L7_20_Contig5369	#15	1540	169	2.3317				CIDRa3.2-CIDRa3.1-DBLd1-	block_29-block_55-block_5-block_82-block_3-block_16-block_77-block_11-block_4-block_15-block_30-block_26-block_10-block_32-block_1-block_8-
S_L7_20_Contig5370	#15	1548	762	10.459	2	1		DBLb1-DBLb3-	block_59-block_1-block_62-block_61-block_18-block_101-block_52-block_65-block_53-block_4-block_13-block_3-block_272-block_14-block_5-block_183-block_2-
S_L7_20_Contig5371	#15	1560	731	9.95634	6			DBLd5-CIDRb5-	block_21-block_28-block_205-block_31-block_10-block_24-block_1-block_8-block_555-block_22-block_50-block_226-block_6-block_9-block_497-block_1-block_7-block_12-
S_L7_20_Contig5372	#15	1573	277	3.7416	8	6		DBLb6-DBLg2-DBLg6-	block_61-block_18-block_15-block_139-block_4-block_11-block_16-block_3-block_86-block_5-block_90-block_29-block_2-block_59-block_1-block_62-block_61-block_18-block_15-block_74-
S_L7_20_Contig5373	#15	1618	1142	14.9967	11	9	PfKE01_040019700	CIDRa2.10-CIDRa3.1-DBLd1-	block_2-block_96-block_55-block_5-block_27-block_3-block_16-block_11-block_81-block_4-block_35-block_15-block_26-block_10-block_372-block_32-block_1-block_472-
S_L7_20_Contig5374	#15	1704	110	1.37161				DBLb3-DBLg5-	block_65-block_53-block_4-block_189-block_13-block_3-block_146-block_14-block_5-block_187-block_2-block_1-block_62-block_61-block_30-block_15-block_139-block_4-block_11-
S_L7_20_Contig5375	#15	1807	190	2.2341				DBLd1-CIDRg12-	block_4-block_73-block_11-block_77-block_16-block_3-block_252-block_452-block_5-block_55-block_29-block_105-block_2-block_12-block_7-block_1-block_122-block_9-block_483-block_6-block_103-block_85-block_22-block_83-
S_L7_20_Contig5376	#15	4464	6661	31.7046	1			NTSB-DBLa0.8-CIDRa3.5-DBLd1-CIDRb1-	block_20-block_17-block_19-block_4-block_13-block_3-block_386-block_14-block_64-block_5-block_60-block_2-block_12-block_7-block_1-block_9-block_186-block_6-block_8-block_1-block_32-block_10-block_49-block_332-block_15-block_35-block_4-block_11-block_77-block_16-block_3-block_27-block_5-block_301-block_29-block_87-block_2-block_12-block_7-block_1-block_9-block_6-block_50-block_22-block_555-block_8…
S_L7_20_Contig5377	#15	2056	1254	12.9593	1			DBLa0.19-CIDRa2.3-DBLd1-	block_3-block_16-block_77-block_11-block_106-block_4-block_35-block_15-block_389-block_26-block_10-block_447-block_32-block_1-block_8-block_223-block_57-block_154-block_23-block_6-block_118-block_9-block_34-block_1-
S_L7_20_Contig5378	#15	2138	1041	10.3455	300	183	PfIT_050037800	CIDRa1.2-DBLb11-DBLg1-	block_3-block_16-block_11-block_4-block_139-block_15-block_18-block_61-block_62-block_1-block_604-block_59-block_2-block_183-block_605-block_5-block_14-block_457-block_3-block_234-block_13-block_189-block_4-block_53-block_65-block_141-block_10-
S_L7_20_Contig5379	#15	3287	2989	19.3212	3	2		NTSB-DBLa2-CIDRa1.8-DBLb12-	block_71-block_20-block_17-block_19-block_4-block_13-block_616-block_3-block_54-block_14-block_64-block_5-block_60-block_2-block_12-block_7-block_1-block_70-block_9-block_6-block_150-block_23-block_57-block_8-block_1-block_121-block_10-block_141-block_52-block_65-block_53-block_4-block_13-block_234-block_3-block_146-block_14-block_5-block_187-
S_L7_20_Contig5380	#15	2189	4969	48.2314	259	167		NTSA-DBLa1.1-CIDRa1.2-	block_121-block_1-block_8-block_57-block_23-block_150-block_6-block_536-block_9-block_70-block_1-block_7-block_12-block_2-block_60-block_5-block_179-block_14-block_219-block_3-block_513-block_13-block_4-block_19-block_17-block_20-block_264-
S_L7_20_Contig5381	#15	2197	1061	10.2611	13	11	PfKE01_040019700 PfCD01_040018100	NTSB-DBLa0.5-CIDRa2.5-	block_20-block_17-block_19-block_4-block_13-block_215-block_3-block_79-block_14-block_64-block_5-block_36-block_2-block_12-block_1-block_34-block_9-block_118-block_6-block_143-block_23-block_57-block_116-block_8-block_472-
S_L7_20_Contig5382	#15	5502	4078	15.7483	20			NTSB-DBLa0.5-CIDRa2.10-DBLd1-CIDRb1-	block_20-block_17-block_19-block_4-block_13-block_3-block_79-block_14-block_64-block_5-block_36-block_88-block_2-block_12-block_7-block_1-block_34-block_9-block_75-block_6-block_143-block_23-block_154-block_57-block_116-block_8-block_472-block_1-block_334-block_32-block_10-block_49-block_26-block_30-block_15-block_35-block_4-block_11-block_16-block_3-block_27-block_5-block_55-block_29-block_2-blo…
S_L7_20_Contig5383	#15	2529	1334	11.2076	1			DBLd1-CIDRb1-	block_35-block_132-block_4-block_517-block_11-block_16-block_3-block_156-block_27-block_5-block_55-block_29-block_2-block_12-block_7-block_1-block_72-block_504-block_6-block_180-block_50-block_22-block_107-block_8-block_1-block_24-block_10-block_31-block_56-block_33-block_21-
S_L7_20_Contig5384	#15	2741	226	1.75189	12			NTSB-DBLa0.4-CIDRa6-DBLd1-	block_132-block_35-block_15-block_30-block_26-block_10-block_32-block_1-block_8-block_57-block_23-block_6-block_350-block_9-block_184-block_1-block_7-block_12-block_2-block_36-block_5-block_14-block_79-block_3-block_13-block_4-block_19-block_17-block_20-
S_L7_20_Contig5385	#15	5964	6396	22.7865	32	2		DBLg12-DBLd5-CIDRb3-DBLb6-DBLg6-CIDRa3.1-	block_28-block_26-block_26-block_49-block_169-block_78-block_45-block_1-block_136-block_2-block_133-block_5-block_82-block_3-block_16-block_11-block_4-block_74-block_15-block_18-block_61-block_62-block_1-block_59-block_2-block_259-block_5-block_14-block_3-block_13-block_4-block_53-block_17-block_52-block_331-block_10-block_24-block_508-block_1-block_8-block_22-block_50-block_6-block_151-block_1-b…
S_L7_20_Contig5449	#15	727	71	2.07506	9	6		DBLe1-DBLg13-	block_94-block_2-block_48-block_1-block_45-block_18-block_15-block_74-block_4-
S_L7_20_Contig5601	#15	4195	3629	18.3807	3			NTSB-DBLa0.1-CIDRa3.1-DBLd1-	block_1-block_7-block_12-block_2-block_105-block_424-block_29-block_55-block_5-block_3-block_16-block_77-block_11-block_4-block_35-block_15-block_26-block_10-block_32-block_1-block_8-block_67-block_110-block_63-block_71-block_23-block_68-block_6-block_75-block_9-block_34-block_1-block_7-block_12-block_2-block_163-block_36-block_5-block_64-block_14-block_3-block_215-block_13-block_4-block_19-block…
S_L7_20_Contig5638	#15	1131	88	1.65321				CIDRa3.1-CIDRa3.1-DBLd1-	block_8-block_1-block_299-block_32-block_10-block_26-block_30-block_15-block_35-block_4-block_357-block_517-
S_L7_20_Contig5698	#15	539	33	1.30086				DBLa0.1-	block_2-block_88-block_36-block_5-block_210-block_14-block_3-block_233-
S_L7_20_Contig5751	#15	628	54	1.82701				CIDRa2.2-DBLd1-	block_4-block_35-block_15-block_30-block_26-block_49-block_10-
S_L7_20_Contig5757	#15	593	33	1.1824	1	1		DBLa1.5-CIDRd1-	block_7-block_1-block_151-block_9-block_6-block_202-block_22-
S_L7_20_Contig5856	#15	587	25	0.904917	62	62		NTSB-DBLa0.24-	block_564-block_20-block_17-block_19-block_4-block_13-block_3-
S_L7_20_Contig5885	#15	674	36	1.13488	9	9		CIDRb3-	block_24-block_10-block_606-block_31-block_56-block_137-block_21-
S_L7_20_Contig5896	#15	541	22	0.864037	4	4		DBLb5-	block_290-block_4-block_53-block_65-block_52-block_101-
S_L7_20_Contig5955	#15	3595	871	5.14785	32	2		NTSA-DBLa1.2-CIDRa1.5-DBLb6-	block_62-block_614-block_1-block_59-block_2-block_589-block_5-block_14-block_174-block_3-block_13-block_4-block_53-block_65-block_101-block_10-block_121-block_1-block_8-block_57-block_23-block_150-block_6-block_9-block_1-block_7-block_12-block_2-block_60-block_5-block_14-block_486-block_3-block_513-block_13-block_4-block_19-block_17-block_20-
S_L7_20_Contig5998	#15	630	23	0.775701				DBLa2-CIDRa1.1-	block_57-block_23-block_451-block_6-block_399-block_9-block_70-
S_L7_20_Contig6069	#15	878	48	1.16159				DBLa0.9-	block_7-block_2-block_60-block_5-block_14-block_54-block_3-block_13-block_4-block_19-
S_L7_20_Contig6073	#15	3476	8071	49.3349	19	1		DBLb1-DBLg6-CIDRa3.1-DBLd1-	block_1-block_7-block_12-block_2-block_619-block_29-block_249-block_5-block_27-block_3-block_16-block_77-block_11-block_4-block_35-block_15-block_30-block_30-block_26-block_114-block_78-block_45-block_1-block_136-block_2-block_411-block_133-block_5-block_82-block_3-block_16-block_11-block_4-block_74-block_15-block_18-block_61-block_62-block_1-block_250-block_59-block_2-block_187-
S_L7_20_Contig6139	#15	690	87	2.67903	6	6		DBLg12-	block_15-block_74-block_4-block_11-block_16-block_3-block_86-block_5-block_90-
S_L7_20_Contig6143	#15	572	41	1.52298				DBLd1-	block_16-block_3-block_27-block_5-block_55-block_29-block_198-block_2-
S_L7_20_Contig6174	#15	502	72	3.04744				DBLa0.11-	block_12-block_2-block_163-block_36-block_5-block_64-block_14-block_54-block_3-
S_L7_20_Contig6181	#15	3630	1168	6.83665	3			DBLa0.12-CIDRa2.2-DBLd1-CIDRg1-	block_2-block_12-block_7-block_1-block_34-block_9-block_118-block_6-block_438-block_23-block_57-block_8-block_1-block_32-block_10-block_15-block_35-block_132-block_4-block_11-block_77-block_16-block_3-block_82-block_433-block_5-block_55-block_29-block_87-block_2-block_12-block_7-block_1-block_9-block_178-block_6-block_148-block_22-block_522-block_8-block_1-
S_L7_20_Contig6185	#15	630	79	2.66436	22	22		DBLa1.7-	block_7-block_12-block_2-block_60-block_5-block_179-block_14-block_446-block_3-block_13-
S_L7_20_Contig6194	#15	620	52	1.78204				DBLa0.12-	block_4-block_13-block_3-block_54-block_14-block_64-block_5-block_36-block_2-
S_L7_20_Contig6196	#15	1006	194	4.09742	3	3		DBLb6-DBLg1-	block_183-block_2-block_59-block_1-block_614-block_62-block_61-block_18-block_15-block_286-block_4-block_11-block_16-block_3-
S_L7_20_Contig6234	#15	557	47	1.79287				NTSB-DBLa0.24-	block_439-block_20-block_17-block_19-block_4-block_13-
S_L7_20_Contig6236	#15	570	29	1.08101	2	2		CIDRa3.4-	block_8-block_67-block_288-block_63-block_208-block_23-block_68-block_6-
S_L7_20_Contig6247	#15	511	80	3.32641				NTSB-DBLa0.23-	block_4-block_19-block_17-block_20-block_599-
S_L7_20_Contig6257	#15	503	27	1.14052	7	7		DBLa1.2-	block_1-block_7-block_12-block_2-block_60-block_5-
S_L7_20_Contig6277	#15	2011	230	2.43009	86	76		DBLd4-CIDRg2-	block_205-block_31-block_10-block_24-block_1-block_8-block_22-block_85-block_477-block_6-block_9-block_1-block_7-block_12-block_2-block_96-block_5-block_27-block_3-block_16-block_77-
S_L7_20_Contig6285	#15	979	4879	105.89	6			DBLd7-CIDRb5-	block_72-block_9-block_6-block_138-block_50-block_22-block_172-block_8-block_1-block_24-block_10-
S_L7_20_Contig6289	#15	513	20	0.828361	4	4		DBLa1.7-	block_14-block_446-block_3-block_13-block_4-block_19-block_17-
S_L7_20_Contig6294	#15	523	52	2.11256				NTSB-DBLa0.12-	block_4-block_19-block_17-block_20-
S_L7_20_Contig6296	#15	524	66	2.67621	8	8		DBLd1-	block_87-block_29-block_55-block_5-block_228-block_3-
S_L7_20_Contig6298	#15	658	45	1.45309	38	37		DBLd1-CIDRb1-	block_8-block_172-block_22-block_50-block_500-block_6-block_9-block_72-
S_L7_20_Contig6299	#15	529	302	12.1299					block_10-block_207-block_56-block_30-block_21-
S_L7_20_Contig6301	#15	529	47	1.88777	1	1		CIDRb5-CIDRb7-	block_21-block_376-block_127-block_31-block_10-block_24-
S_L7_20_Contig6303	#15	530	297	11.9066				CIDRb1-	block_8-block_1-block_516-block_24-block_10-block_31-
S_L7_20_Contig6308	#15	532	82	3.27498	18	18		CIDRb5-	block_127-block_31-block_10-block_24-block_1-block_8-
S_L7_20_Contig6318	#15	545	256	9.98045				DBLpam3-	block_1-block_428-block_306-block_2-block_313-block_5-block_314-block_3-
S_L7_20_Contig6330	#15	558	178	6.77786	1	1		DBLb1-	block_14-block_5-block_183-block_2-block_59-block_1-block_119-
S_L7_20_Contig6332	#15	600	74	2.62052	3	3		NTSB-DBLa0.23-	block_3-block_102-block_13-block_4-block_19-block_17-block_20-
S_L7_20_Contig6334	#15	560	174	6.60189	11	11		DBLd1-CIDRb1-	block_8-block_107-block_22-block_50-block_173-block_6-block_9-
S_L7_20_Contig6335	#15	563	154	5.81191	5	5		DBLb3-	block_52-block_65-block_53-block_4-block_584-block_13-block_3-
S_L7_20_Contig6345	#15	576	47	1.73373				DBLa0.20-CIDRa3.1-	block_1-block_239-block_151-block_9-block_75-block_245-block_6-block_68-block_23-
S_L7_20_Contig6346	#15	591	49	1.76163	1	1		CIDRb5-	block_21-block_366-block_33-block_30-block_56-block_31-block_10-block_24-
S_L7_20_Contig6347	#15	579	89	3.26602	2	2		DBLa2-CIDRa1.8-	block_70-block_9-block_449-block_6-block_23-block_57-
S_L7_20_Contig6358	#15	595	72	2.57112	394	394		DBLa1.1-CIDRa1.2-	block_2-block_12-block_7-block_1-block_70-block_9-block_536-block_6-block_150-
S_L7_20_Contig6359	#15	636	42	1.40313					block_73-block_33-
S_L7_20_Contig6361	#15	608	670	23.4141	2	2		CIDRb1-	block_95-block_137-block_56-block_31-block_10-block_24-
S_L7_20_Contig6364	#15	606	631	22.124	51	51		DBLepam4-DBLepam5-	block_310-block_76-block_4-block_404-block_11-
S_L7_20_Contig6365	#15	1404	107	1.61929				CIDRa2.9-CIDRa2.3-DBLd1-	block_4-block_35-block_15-block_49-block_10-block_32-block_1-block_8-block_116-block_63-block_154-block_23-block_143-block_6-
S_L7_20_Contig6368	#15	609	458	15.9792	17	17		DBLepam4-DBLepam5-	block_310-block_76-block_4-block_404-block_11-
S_L7_20_Contig6369	#15	609	53	1.84912				DBLd1-	block_16-block_3-block_27-block_5-block_55-block_29-block_105-
S_L7_20_Contig6371	#15	617	172	5.92311	4	4		DBLd1-CIDRb1-	block_2-block_12-block_7-block_1-block_72-block_9-block_504-block_6-
S_L7_20_Contig6376	#15	774	110	3.01966	3	3		DBLb3-	block_52-block_65-block_53-block_4-block_584-block_13-block_3-block_14-block_5-
S_L7_20_Contig6380	#15	897	236	5.59019	3			CIDRb1-	block_8-block_1-block_24-block_10-block_31-block_56-block_137-block_28-block_21-
S_L7_20_Contig6381	#15	628	440	14.8868				CIDRg10-	block_24-block_10-block_459-block_31-block_56-block_33-block_21-
S_L7_20_Contig6382	#15	629	691	23.3418				DBLd1-CIDRb6-	block_243-block_6-block_443-block_9-block_72-block_1-block_7-block_12-block_2-
S_L7_20_Contig6387	#15	987	85	1.82982				DBLa0.23-	block_492-block_1-block_7-block_12-block_2-block_36-block_5-block_14-block_54-block_3-block_135-block_13-block_4-block_19-
S_L7_20_Contig6393	#15	640	122	4.0503	11	11		CIDRb5-	block_24-block_10-block_31-block_56-block_28-block_366-block_21-block_41-
S_L7_20_Contig6400	#15	656	99	3.20655	12	12		DBLa1.1-CIDRa1.7-	block_1-block_70-block_9-block_449-block_6-block_150-block_23-block_57-block_8-
S_L7_20_Contig6401	#15	703	37	1.11829	1	1		DBLd1-	block_1-block_7-block_12-block_2-block_87-block_29-block_301-block_5-block_27-block_253-block_3-
S_L7_20_Contig6404	#15	1001	113	2.39856				DBLb8-CIDRa3.3-	block_13-block_4-block_53-block_65-block_52-block_347-block_26-block_346-block_49-block_10-block_71-
S_L7_20_Contig6406	#15	667	283	9.01504	1	1		DBLd1-CIDRb1-	block_8-block_107-block_22-block_50-block_173-block_6-block_9-block_497-block_1-
S_L7_20_Contig6410	#15	823	91	2.34935				DBLa0.12-	block_1-block_7-block_12-block_2-block_36-block_5-block_210-block_14-block_54-block_3-block_13-block_4-
S_L7_20_Contig6411	#15	690	253	7.79073	6	6		DBLb3-	block_15-block_18-block_61-block_62-block_1-block_382-block_2-block_625-
S_L7_20_Contig6416	#15	832	85	2.17071	3	3		CIDRb1-	block_21-block_56-block_31-block_224-block_10-block_24-block_1-block_8-
S_L7_20_Contig6418	#15	690	374	11.5167	3	2		CIDRb3-CIDRb7-	block_1-block_24-block_10-block_195-block_31-block_127-block_21-
S_L7_20_Contig6420	#15	700	50	1.51768	10	10		NTSB-DBLa0.17-	block_79-block_3-block_135-block_13-block_4-block_19-block_17-block_20-
S_L7_20_Contig6421	#15	700	608	18.4549	160	14		DBLb9-	block_331-block_52-block_65-block_53-block_4-block_13-block_3-block_317-
S_L7_20_Contig6423	#15	720	239	7.05297				NTSB-DBLa0.23-	block_217-block_20-block_17-block_19-block_4-block_13-
S_L7_20_Contig6426	#15	945	98	2.20344				DBLa0.20-CIDRa3.1-	block_8-block_67-block_288-block_63-block_23-block_68-block_6-block_75-block_9-block_34-block_1-block_7-
S_L7_20_Contig6428	#15	726	285	8.34094	3	3		CIDRa3.4-	block_168-block_32-block_570-block_1-block_8-block_316-block_67-block_110-block_63-block_104-block_23-
S_L7_20_Contig6429	#15	2008	545	5.76686	334		PfGA01_120024300 PF3D7_1219400 PfSN01_120025200 PfSD01_120024500 PfKH02_120024600 PfKE01_120024600 PfGB4_120024200 PfGN01_120025550 PfDd2_120024000 PfHB3_120024400	DBLa0.1-CIDRa3.1-CIDRa3.1-CIDRa3.1-	block_26-block_10-block_32-block_1-block_8-block_67-block_26-block_63-block_23-block_68-block_6-block_9-block_34-block_1-
S_L7_20_Contig6436	#15	1048	134	2.71675	34	7		NTSA-DBLa1.4-	block_12-block_2-block_60-block_5-block_14-block_54-block_3-block_13-block_4-block_19-block_17-block_20-block_155-
S_L7_20_Contig6438	#15	737	197	5.67944	27	25		DBLb3-DBLb3-	block_297-block_5-block_14-block_146-block_3-block_266-block_13-block_4-block_65-block_52-block_141-
S_L7_20_Contig6441	#15	753	89	2.51132	2			NTSB-DBLa0.12-	block_13-block_4-block_19-block_17-block_20-block_194-
S_L7_20_Contig6443	#15	755	73	2.05439	1	1		DBLa0.16-	block_19-block_4-block_13-block_215-block_3-block_79-block_14-block_64-block_5-block_36-block_163-block_2-
S_L7_20_Contig6444	#15	756	289	8.12237	11	10		CIDRb5-	block_24-block_10-block_31-block_366-block_21-
S_L7_20_Contig6445	#15	757	223	6.25916				DBLd1-	block_11-block_158-block_16-block_3-block_156-block_27-block_5-block_55-block_29-block_105-block_2-block_12-
S_L7_20_Contig6446	#15	770	74	2.04196	61	59		DBLa1.1-CIDRa1.4-	block_1-block_70-block_9-block_399-block_6-block_150-block_23-block_57-block_8-
S_L7_20_Contig6448	#15	764	83	2.3083				DBLa0.1-	block_7-block_130-block_2-block_153-block_36-block_5-block_161-block_14-block_79-block_3-block_381-block_13-
S_L7_20_Contig6449	#15	777	110	3.008	369	6		NTSA-DBLa1.3-	block_14-block_219-block_3-block_13-block_4-block_610-block_19-block_17-block_20-
S_L7_20_Contig6452	#15	786	577	15.5977				CIDRg10-DBLg10-	block_11-block_4-block_139-block_15-block_56-block_31-block_491-block_10-block_24-
S_L7_20_Contig6453	#15	787	155	4.1847	16	16		CIDRb6-	block_8-block_1-block_24-block_10-block_31-block_56-block_137-block_28-block_21-
S_L7_20_Contig6455	#15	793	1883	50.4527				CIDRb1-	block_21-block_28-block_127-block_31-block_10-block_24-block_1-block_8-
S_L7_20_Contig6456	#15	876	88	2.13445	17	16		DBLd7-	block_9-block_72-block_1-block_7-block_12-block_2-block_409-block_96-block_90-block_5-block_27-block_3-
S_L7_20_Contig6458	#15	798	1449	38.5809	5			CIDRb1-	block_8-block_1-block_24-block_10-block_31-block_56-block_205-block_30-block_21-
S_L7_20_Contig6459	#15	804	305	8.06029				DBLg10-	block_41-block_21-block_28-block_30-block_26-block_26-block_28-block_18-block_45-
S_L7_20_Contig6461	#15	814	375	9.78845				CIDRb1-	block_8-block_1-block_24-block_10-block_491-block_31-block_127-block_28-block_21-
S_L7_20_Contig6462	#15	815	463	12.0706	6	6		CIDRb1-	block_8-block_1-block_24-block_10-block_224-block_31-block_56-block_137-block_21-
S_L7_20_Contig6463	#15	871	46	1.12214	7	7		DBLa0.22-CIDRa3.2-	block_8-block_67-block_110-block_63-block_104-block_23-block_68-block_6-block_245-block_75-block_9-block_34-block_239-block_1-
S_L7_20_Contig6464	#15	821	208	5.38303	15	4		CIDRg10-CIDRa3.1-	block_1-block_24-block_10-block_31-block_127-block_33-block_21-
S_L7_20_Contig6465	#15	826	1934	49.7489	6				block_18-block_33-block_30-block_33-block_33-block_21-block_41-
S_L7_20_Contig6469	#15	839	255	6.45781				CIDRg5-	block_21-block_33-block_137-block_56-block_31-block_271-block_10-block_24-block_1-block_8-
S_L7_20_Contig6470	#15	840	126	3.18712	5	2		DBLd4-CIDRg7-	block_8-block_83-block_22-block_85-block_103-block_6-block_454-block_9-block_122-block_1-block_7-
S_L7_20_Contig6472	#15	845	475	11.9438	3	2		CIDRg10-	block_21-block_56-block_31-block_10-block_24-block_1-block_8-
S_L7_20_Contig6475	#15	1005	322	6.80764				CIDRb5-	block_8-block_1-block_24-block_10-block_31-block_56-block_28-block_21-block_418-block_182-
S_L7_20_Contig6476	#15	870	609	14.8732	12			CIDRb1-CIDRa3.4-	block_21-block_376-block_28-block_205-block_31-block_271-block_10-block_24-block_1-block_8-
S_L7_20_Contig6477	#15	872	316	7.69976	3	3		CIDRb3-	block_21-block_33-block_56-block_31-block_10-block_24-block_1-block_8-
S_L7_20_Contig6478	#15	2957	889	6.38789	17			DBLg11-DBLd1-CIDRb1-	block_107-block_22-block_50-block_138-block_6-block_9-block_72-block_1-block_7-block_2-block_87-block_29-block_55-block_5-block_27-block_510-block_3-block_16-block_11-block_4-block_35-block_15-block_18-block_45-block_1-block_2-block_29-block_5-block_98-block_3-block_16-block_11-
S_L7_20_Contig6479	#15	881	238	5.73995				CIDRg12-	block_21-block_33-block_221-block_31-block_491-block_10-block_24-block_567-block_1-block_8-
S_L7_20_Contig6481	#15	953	131	2.92069	1	1		NTSB-DBLa0.9-	block_12-block_2-block_36-block_5-block_14-block_524-block_3-block_188-block_13-block_4-block_19-block_17-block_20-
S_L7_20_Contig6482	#15	883	532	12.8014	80	77		DBLz3-	block_124-block_18-block_93-block_592-block_1-block_99-block_2-block_92-block_5-block_14-block_574-block_3-
S_L7_20_Contig6483	#15	890	45	1.07431	2	1		DBLd1-CIDRb6-	block_50-block_138-block_6-block_9-block_72-block_1-block_7-block_12-block_2-block_460-block_29-block_55-block_5-
S_L7_20_Contig6485	#15	908	282	6.59888	24	3		DBLg11-DBLd5-	block_86-block_5-block_105-block_2-block_48-block_1-block_45-block_18-block_15-block_585-
S_L7_20_Contig6486	#15	900	293	6.91723	1	1		CIDRb5-CIDRg3-	block_1-block_24-block_10-block_271-block_31-block_388-block_33-block_21-
S_L7_20_Contig6489	#15	916	374	8.67527	1			CIDRb1-	block_21-block_366-block_30-block_56-block_31-block_10-block_24-block_456-block_1-block_8-
S_L7_20_Contig6491	#15	936	277	6.28797				DBLd1-	block_35-block_4-block_11-block_16-block_3-block_156-block_27-block_5-block_55-block_29-
S_L7_20_Contig6493	#15	940	480	10.8498	3	3		DBLd1-CIDRb1-	block_2-block_12-block_7-block_1-block_72-block_9-block_443-block_6-block_226-block_50-block_22-block_8-block_1-
S_L7_20_Contig6497	#15	1662	143	1.82815	3	2		DBLpam1-DBLpam2-DBLpam2-	block_3-block_131-block_5-block_303-block_60-block_2-block_1-block_115-block_335-block_4-block_13-block_620-block_3-block_325-block_14-
S_L7_20_Contig6498	#15	981	114	2.46912	75	9		CIDRa3.2-DBLd1-	block_316-block_8-block_1-block_32-block_10-block_49-block_26-block_15-block_35-block_4-block_81-
S_L7_20_Contig6499	#15	989	250	5.37094	17	13		CIDRb1-	block_41-block_21-block_221-block_56-block_31-block_10-block_24-block_1-block_8-block_417-block_22-
S_L7_20_Contig6500	#15	1001	1429	30.3323				CIDRb5-	block_8-block_1-block_24-block_10-block_195-block_31-block_56-block_137-block_21-block_182-
S_L7_20_Contig6501	#15	1586	293	3.92529				DBLd1-CIDRb1-CIDRa3.1-	block_21-block_28-block_28-block_56-block_224-block_10-block_24-block_607-block_1-block_8-block_107-block_22-block_50-block_180-block_6-block_244-block_9-block_1-block_7-block_12-
S_L7_20_Contig6502	#15	1005	1644	34.757	6			CIDRg7-	block_8-block_1-block_24-block_10-block_31-block_56-block_221-block_33-block_21-block_41-
S_L7_20_Contig6504	#15	1018	133	2.77594				DBLd1-	block_1-block_7-block_12-block_2-block_105-block_29-block_562-block_55-block_5-block_27-block_3-block_16-block_273-block_11-
S_L7_20_Contig6505	#15	1020	533	11.1028	3	1		CIDRb1-	block_8-block_1-block_24-block_10-block_31-block_254-block_21-
S_L7_20_Contig6506	#15	1028	2451	50.6591				DBLe10-	block_473-block_41-block_21-block_608-block_78-block_45-block_1-block_48-block_2-block_222-block_5-block_126-block_3-block_160-
S_L7_20_Contig6508	#15	1036	250	5.12728	9			DBLd1-	block_96-block_301-block_5-block_27-block_3-block_16-block_237-block_11-block_4-block_132-block_35-block_15-block_30-
S_L7_20_Contig6509	#15	1060	70	1.40313	2			DBLg6-DBLd1-	block_45-block_78-block_49-block_26-block_26-block_26-block_15-block_35-block_34-block_4-block_11-
S_L7_20_Contig6511	#15	2464	849	7.32106	1603	657	PfSN01_130075400 PfGB4_000006700 PF3D7_0600400 PfGB4_090005700 PfGB4_070037400 PF3D7_0937600 PfCD01_140086100 PfIT_140006400 PfGA01_040005800	DBLa1.3-DBLe8-	block_5-block_92-block_2-block_99-block_1-block_592-block_93-block_18-block_76-block_4-block_11-block_3-block_108-block_5-block_142-block_2-block_200-block_97-block_41-block_43-block_140-block_42-
S_L7_20_Contig6513	#15	1105	238	4.57637	4	3		NTSB-DBLa0.7-	block_20-block_17-block_19-block_4-block_13-block_215-block_3-block_14-block_64-block_5-block_36-block_2-
S_L7_20_Contig6514	#15	1100	133	2.56901	329	23		NTSB-DBLa0.22-	block_2-block_36-block_5-block_64-block_14-block_79-block_3-block_13-block_4-block_19-block_17-block_20-
S_L7_20_Contig6515	#15	2644	514	4.13056	9	3		DBLa0.20-CIDRa3.3-DBLd1-	block_1-block_34-block_9-block_6-block_68-block_23-block_104-block_63-block_114-block_67-block_8-block_1-block_32-block_10-block_49-block_26-block_30-block_15-block_35-block_4-block_11-block_109-block_16-block_3-block_27-block_5-block_55-block_29-
S_L7_20_Contig6519	#15	1136	139	2.59982	7	6		CIDRa1.4-DBLb1-	block_183-block_5-block_14-block_146-block_3-block_234-block_13-block_4-block_53-block_65-block_52-block_141-block_10-block_368-block_121-
S_L7_20_Contig6520	#15	1141	245	4.56234	16	16	PfKE01_040019800 PfCD01_040018200	DBLd1-CIDRb6-	block_359-block_27-block_5-block_55-block_29-block_424-block_105-block_2-block_12-block_7-block_1-block_72-block_9-block_6-block_50-
S_L7_20_Contig6522	#15	1152	139	2.56371	4	4		DBLg2-	block_21-block_33-block_18-block_61-block_129-block_1-block_59-block_2-block_5-
S_L7_20_Contig6524	#15	1191	1569	27.991	9			CIDRb1-	block_50-block_22-block_159-block_8-block_1-block_24-block_10-block_31-block_33-block_376-block_21-block_182-block_182-
S_L7_20_Contig6525	#15	1193	872	15.5304	5			DBLb7-DBLd3-	block_625-block_2-block_59-block_1-block_62-block_61-block_18-block_434-block_33-block_15-
S_L7_20_Contig6526	#15	1197	1906	33.8326				DBLd1-	block_7-block_12-block_2-block_87-block_29-block_55-block_5-block_27-block_3-block_16-block_109-block_11-block_106-block_73-block_4-block_35-
S_L7_20_Contig6527	#15	1210	131	2.30034				DBLa0.15-CIDRa3.2-	block_1-block_34-block_9-block_75-block_6-block_68-block_23-block_63-block_110-block_67-block_354-block_8-block_1-block_32-
S_L7_20_Contig6528	#15	1216	293	5.11966				DBLd1-	block_2-block_105-block_96-block_5-block_452-block_252-block_3-block_16-block_158-block_11-block_106-block_4-block_35-block_15-block_30-
S_L7_20_Contig6529	#15	3706	857	4.9134	15	1		DBLa0.15-DBLa0.18-CIDRa3.1-DBLd1-CIDRb4-	block_6-block_9-block_1-block_7-block_12-block_2-block_87-block_29-block_448-block_55-block_5-block_27-block_3-block_16-block_77-block_11-block_73-block_4-block_35-block_15-block_30-block_49-block_10-block_125-block_32-block_1-block_8-block_67-block_110-block_63-block_104-block_23-block_68-block_6-block_268-block_9-block_1-block_7-block_12-block_2-block_88-block_36-block_5-block_14-block_79-
S_L7_20_Contig6531	#15	1390	238	3.63805				CIDRa3.1-CIDRa3.1-DBLd1-	block_2-block_105-block_29-block_55-block_5-block_27-block_359-block_3-block_16-block_77-block_11-block_81-block_4-block_15-block_26-block_10-
S_L7_20_Contig6532	#15	4326	1160	5.69742	9			DBLa0.5-CIDRa2.10-DBLd1-CIDRb1-	block_24-block_1-block_8-block_417-block_22-block_50-block_6-block_361-block_9-block_72-block_1-block_7-block_12-block_2-block_29-block_55-block_5-block_27-block_185-block_3-block_16-block_273-block_11-block_4-block_35-block_15-block_530-block_593-block_26-block_10-block_32-block_1-block_8-block_223-block_57-block_514-block_23-block_251-block_6-block_75-block_9-block_34-block_1-block_7-block_12-b…
S_L7_20_Contig6533	#15	1323	231	3.70987	3			DBLa0.22-DBLd1-	block_9-block_75-block_26-block_30-block_15-block_35-block_4-block_81-block_11-block_289-block_16-block_3-block_253-block_27-block_5-block_55-block_29-block_198-block_2-
S_L7_20_Contig6534	#15	1342	323	5.11395	2			DBLd1-CIDRb1-	block_107-block_22-block_50-block_138-block_6-block_9-block_1-block_7-block_12-block_2-block_87-block_29-block_249-block_5-block_27-block_3-block_16-
S_L7_20_Contig6535	#15	1435	506	7.49213				DBLd1-	block_9-block_1-block_7-block_2-block_29-block_55-block_5-block_27-block_419-block_3-block_16-block_11-block_165-
S_L7_20_Contig6536	#15	1373	4004	61.9627	23	19		DBLd1-CIDRb1-	block_1-block_72-block_9-block_6-block_180-block_50-block_22-block_107-block_8-block_1-block_24-block_10-block_271-block_31-block_56-block_21-
S_L7_20_Contig6537	#15	1374	1029	15.9124	1	1		NTSB-DBLa0.5-	block_20-block_17-block_19-block_4-block_13-block_102-block_3-block_79-block_14-block_64-block_5-block_36-block_153-block_2-block_12-block_7-
S_L7_20_Contig6539	#15	1763	169	2.03677	10	2		DBLg2-DBLd1-	block_55-block_5-block_27-block_3-block_16-block_158-block_11-block_81-block_4-block_35-block_15-block_18-block_61-block_1-block_59-block_2-block_5-block_86-block_3-
S_L7_20_Contig6540	#15	2739	2516	19.5176	67			DBLg4-CIDRa3.1-DBLz3-	block_16-block_3-block_82-block_5-block_133-block_2-block_48-block_1-block_45-block_18-block_28-block_134-block_26-block_26-block_26-block_315-block_4-block_13-block_3-block_574-block_14-block_5-block_92-block_2-block_99-block_1-block_62-block_93-block_18-block_124-
S_L7_20_Contig6541	#15	1529	2204	30.6275				DBLd1-CIDRb1-	block_8-block_159-block_22-block_50-block_180-block_6-block_9-block_1-block_7-block_12-block_2-block_105-block_29-block_55-block_5-block_27-block_3-block_16-block_158-block_11-
S_L7_20_Contig6542	#15	1556	2094	28.5939	3	1		DBLd1-CIDRb1-CIDRa3.4-	block_1-block_72-block_9-block_6-block_180-block_50-block_22-block_107-block_8-block_1-block_24-block_10-block_31-block_56-block_205-block_26-block_26-block_28-block_376-block_21-
S_L7_20_Contig6543	#15	1563	514	6.98733	3			DBLb7-DBLg11-	block_45-block_1-block_48-block_2-block_94-block_90-block_5-block_86-block_3-block_16-block_11-block_4-block_139-block_15-block_30-block_26-block_49-block_18-block_61-
S_L7_20_Contig6544	#15	1574	953	12.8646				DBLd1-CIDRb1-	block_7-block_1-block_9-block_6-block_138-block_50-block_22-block_276-block_8-block_1-block_24-block_10-block_31-block_127-block_21-
S_L7_20_Contig6545	#15	1586	661	8.85534	1			DBLd1-CIDRb1-	block_21-block_33-block_137-block_127-block_31-block_10-block_24-block_1-block_8-block_107-block_22-block_50-block_226-block_6-block_9-block_72-block_1-block_7-
S_L7_20_Contig6546	#15	1589	262	3.50336	2	1		DBLd1-CIDRb1-	block_21-block_33-block_56-block_31-block_10-block_24-block_1-block_8-block_417-block_22-block_50-block_226-block_6-block_9-block_1-block_7-block_12-block_2-
S_L7_20_Contig6547	#15	1767	330	3.96812	4			DBLa0.11-CIDRa2.1-CIDRa3.1-DBLd1-	block_158-block_11-block_4-block_35-block_15-block_30-block_26-block_10-block_32-block_1-block_8-block_57-block_23-block_6-block_118-block_9-block_70-block_1-
S_L7_20_Contig6548	#15	1612	4617	60.8558	29	20	PfKE01_040019700 PfCD01_040018100	DBLd1-CIDRb1-	block_2-block_12-block_7-block_1-block_72-block_9-block_6-block_243-block_50-block_22-block_107-block_8-block_1-block_24-block_10-block_231-block_31-block_56-block_33-block_366-block_21-
S_L7_20_Contig6549	#15	1641	528	6.83647	1			DBLd1-CIDRb5-	block_2-block_12-block_7-block_1-block_9-block_496-block_6-block_50-block_22-block_172-block_8-block_1-block_24-block_10-block_31-block_127-block_95-block_21-
S_L7_20_Contig6550	#15	2952	1858	13.3732	6			CIDRa3.4-CIDRa3.1-DBLd1-CIDRb1-	block_21-block_33-block_137-block_56-block_31-block_10-block_24-block_607-block_1-block_8-block_22-block_50-block_149-block_6-block_9-block_1-block_7-block_12-block_2-block_105-block_29-block_249-block_5-block_82-block_3-block_16-block_289-block_11-block_4-block_35-block_15-block_157-block_26-block_10-block_168-
S_L7_20_Contig6551	#15	1678	199	2.51981	3	3		DBLg5-DBLd4-	block_11-block_16-block_3-block_86-block_5-block_90-block_167-block_2-block_136-block_1-block_45-block_257-block_28-block_15-block_74-block_4-block_11-block_77-block_16-block_3-block_27-block_5-
S_L7_20_Contig6552	#15	2157	9999	98.4948	4	1		DBLg10-DBLd1-CIDRb6-	block_45-block_18-block_28-block_28-block_246-block_26-block_15-block_35-block_34-block_4-block_11-block_77-block_16-block_3-block_228-block_27-block_5-block_55-block_29-block_105-block_2-block_12-block_7-block_1-block_9-block_6-block_138-
S_L7_20_Contig6553	#15	1747	3071	37.3503	23			DBLd1-CIDRg3-	block_21-block_33-block_30-block_31-block_10-block_24-block_1-block_8-block_522-block_22-block_85-block_477-block_6-block_178-block_9-block_122-block_1-
S_L7_20_Contig6554	#15	1810	834	9.79026	7	7		DBLd4-CIDRg5-	block_41-block_21-block_127-block_31-block_10-block_24-block_1-block_8-block_83-block_22-block_85-block_103-block_6-block_178-block_9-block_122-block_1-block_7-block_12-block_2-
S_L7_20_Contig6555	#15	2821	2232	16.8112	10			DBLg10-DBLb7-	block_26-block_26-block_18-block_61-block_62-block_1-block_59-block_2-block_297-block_5-block_14-block_272-block_3-block_266-block_13-block_515-block_4-block_53-block_65-block_52-block_101-block_18-block_45-block_1-block_59-block_2-block_5-block_82-block_3-
S_L7_20_Contig6556	#15	2034	1951	20.3804	9			DBLe1-DBLg11-DBLd1-	block_15-block_101-block_246-block_211-block_26-block_49-block_28-block_18-block_45-block_1-block_48-block_2-block_96-block_5-block_86-block_3-block_232-block_11-block_4-block_139-block_15-block_18-block_26-
S_L7_20_Contig6557	#15	2114	319	3.20621	27			DBLb6-DBLg13-	block_5-block_2-block_59-block_1-block_62-block_61-block_18-block_139-block_4-block_11-block_3-block_98-block_5-block_167-block_2-block_48-block_1-block_45-block_18-block_21-block_41-
S_L7_20_Contig6558	#15	2079	1062	10.8537	20	10		DBLd5-CIDRb4-DBLb9-	block_331-block_10-block_24-block_1-block_8-block_22-block_50-block_149-block_6-block_9-block_151-block_1-block_7-block_12-block_2-block_96-block_90-block_5-block_82-block_3-block_16-block_77-block_11-block_4-block_585-
S_L7_20_Contig6559	#15	5193	14217	58.1697	10			NTSB-DBLa0.5-CIDRa2.1-CIDRa3.1-DBLb5-DBLd1-	block_2-block_105-block_29-block_55-block_5-block_82-block_3-block_16-block_11-block_4-block_35-block_15-block_28-block_18-block_61-block_62-block_119-block_1-block_59-block_2-block_5-block_14-block_174-block_3-block_13-block_515-block_4-block_53-block_65-block_52-block_26-block_49-block_10-block_32-block_1-block_8-block_57-block_23-block_6-block_9-block_70-block_1-block_7-block_12-block_2-block_…
S_L7_20_Contig6560	#15	3672	530	3.06676	1			DBLa0.4-CIDRa5-DBLb4-DBLg3-	block_4-block_74-block_15-block_557-block_18-block_481-block_61-block_62-block_119-block_1-block_59-block_2-block_297-block_5-block_14-block_174-block_3-block_13-block_4-block_53-block_65-block_52-block_101-block_10-block_32-block_1-block_8-block_57-block_23-block_6-block_186-block_9-block_34-block_1-block_7-block_12-block_2-block_36-block_5-block_64-block_14-block_446-block_3-block_13-block_4-bl…
S_L7_20_Contig6561	#15	2142	3612	35.829	21	11		DBLb9-DBLg10-	block_14-block_5-block_259-block_2-block_59-block_1-block_62-block_61-block_18-block_15-block_139-block_4-block_11-block_16-block_3-block_86-block_5-block_96-block_2-block_48-block_1-block_45-block_18-block_355-block_21-block_41-
S_L7_20_Contig6562	#15	2249	722	6.8211	7			CIDRa3.2-DBLd1-	block_23-block_480-block_63-block_110-block_67-block_482-block_8-block_1-block_32-block_10-block_49-block_26-block_30-block_15-block_35-block_4-block_507-block_517-block_11-block_16-block_3-block_253-block_27-block_5-block_55-block_29-block_198-block_2-block_12-
S_L7_20_Contig6563	#15	2290	1576	14.6227	30			DBLd5-CIDRb4-DBLb9-	block_2-block_99-block_7-block_1-block_9-block_6-block_50-block_22-block_8-block_1-block_24-block_10-block_331-block_52-block_65-block_53-block_4-block_13-block_3-block_14-block_5-block_187-
S_L7_20_Contig6564	#15	2299	275	2.54156	58	2		CIDRa3.2-DBLd1-CIDRb6-	block_22-block_50-block_6-block_9-block_1-block_7-block_12-block_2-block_29-block_55-block_5-block_82-block_3-block_77-block_11-block_4-block_132-block_35-block_15-block_26-block_26-block_10-block_32-block_1-block_441-block_8-
S_L7_20_Contig6565	#15	2299	1961	18.1236	10			DBLd1-CIDRb1-CIDRa3.1-	block_21-block_295-block_341-block_26-block_31-block_10-block_24-block_516-block_1-block_8-block_107-block_22-block_50-block_138-block_6-block_504-block_9-block_72-block_1-block_7-block_12-block_2-block_87-block_29-block_55-block_5-block_433-block_27-block_253-block_3-block_16-
S_L7_20_Contig6566	#15	4305	1238	6.11018	16			NTSB-DBLa0.9-CIDRa2.2-DBLd1-CIDRb1-	block_8-block_287-block_22-block_50-block_6-block_9-block_72-block_1-block_7-block_12-block_2-block_619-block_29-block_369-block_55-block_5-block_27-block_3-block_16-block_77-block_11-block_4-block_35-block_15-block_26-block_10-block_32-block_1-block_8-block_57-block_23-block_438-block_6-block_9-block_184-block_1-block_7-block_12-block_2-block_60-block_5-block_179-block_14-block_171-block_3-block…
S_L7_20_Contig6567	#15	2423	776	6.8048	19			DBLd1-CIDRb6-	block_165-block_11-block_109-block_16-block_3-block_510-block_177-block_27-block_5-block_55-block_29-block_87-block_2-block_12-block_7-block_1-block_72-block_9-block_6-block_50-block_22-block_172-block_8-block_1-block_24-block_10-block_31-block_56-block_137-block_28-
S_L7_20_Contig6569	#15	2474	514	4.41439	17			CIDRa3.2-DBLd1-CIDRg10-	block_8-block_1-block_32-block_240-block_10-block_49-block_26-block_15-block_35-block_34-block_4-block_73-block_11-block_77-block_16-block_3-block_359-block_27-block_5-block_55-block_29-block_87-block_2-block_12-block_7-block_1-block_370-block_9-block_178-block_6-block_103-block_85-block_22-
S_L7_20_Contig6570	#15	2516	989	8.35204	97			CIDRa1.8-DBLb12-DBLz3-	block_1-block_121-block_10-block_52-block_65-block_53-block_4-block_13-block_3-block_146-block_14-block_5-block_187-block_2-block_59-block_250-block_1-block_62-block_209-block_61-block_18-block_26-block_318-block_4-block_13-block_3-
S_L7_20_Contig6571	#15	2564	3076	25.4903	7	1		DBLd1-CIDRb1-CIDRa3.1-	block_21-block_295-block_341-block_26-block_31-block_10-block_24-block_1-block_8-block_417-block_22-block_50-block_138-block_6-block_9-block_72-block_1-block_7-block_12-block_2-block_87-block_29-block_55-block_5-block_27-block_253-block_3-block_16-block_273-block_11-block_4-block_132-block_35-
S_L7_20_Contig6572	#15	3198	611	4.05947	18			DBLb6-DBLg10-DBLd4-CIDRg1-	block_1-block_8-block_22-block_148-block_6-block_458-block_9-block_1-block_7-block_12-block_2-block_29-block_90-block_5-block_98-block_3-block_16-block_26-block_11-block_4-block_35-block_15-block_18-block_45-block_1-block_48-block_2-block_94-block_5-block_86-block_3-block_11-block_4-block_286-block_15-block_18-block_61-block_62-
S_L7_20_Contig6573	#15	4392	788	3.81216	7			NTSB-DBLa0.4-CIDRa6-DBLd1-CIDRb5-	block_172-block_22-block_50-block_243-block_6-block_244-block_9-block_1-block_7-block_12-block_2-block_498-block_29-block_249-block_5-block_27-block_3-block_16-block_77-block_11-block_81-block_4-block_35-block_15-block_30-block_26-block_10-block_32-block_1-block_8-block_57-block_23-block_6-block_75-block_9-block_1-block_7-block_130-block_2-block_5-block_14-block_171-block_3-block_13-block_4-block…
S_L7_20_Contig6574	#15	2635	966	7.78939	2			CIDRa2.6-CIDRa3.1-DBLd1-CIDRb6-	block_116-block_8-block_472-block_1-block_334-block_32-block_125-block_10-block_49-block_26-block_30-block_15-block_35-block_4-block_81-block_11-block_16-block_3-block_228-block_27-block_5-block_55-block_29-block_87-block_2-block_12-block_7-block_1-block_497-block_9-block_6-block_149-block_50-block_22-
S_L7_20_Contig6575	#15	2656	721	5.76785	1			CIDRa2.5-DBLd1-CIDRb1-	block_159-block_22-block_50-block_226-block_6-block_9-block_72-block_1-block_7-block_12-block_2-block_105-block_29-block_55-block_5-block_398-block_27-block_359-block_3-block_16-block_11-block_106-block_4-block_35-block_15-block_26-block_10-block_32-block_334-block_1-block_8-
S_L7_20_Contig6576	#15	2736	1281	9.94809	6			DBLg3-DBLz4-	block_11-block_16-block_3-block_98-block_5-block_167-block_2-block_1-block_45-block_18-block_52-block_315-block_4-block_13-block_3-block_14-block_5-block_284-block_92-block_2-block_99-block_1-block_283-block_93-block_18-block_280-block_21-block_41-block_128-
S_L7_20_Contig6577	#15	2935	729	5.27748	2			CIDRa3.1-DBLd1-CIDRb6-	block_21-block_120-block_30-block_56-block_31-block_10-block_24-block_1-block_8-block_172-block_22-block_50-block_243-block_6-block_9-block_1-block_7-block_12-block_2-block_619-block_29-block_5-block_27-block_156-block_3-block_16-block_77-block_11-block_4-block_35-block_15-block_26-block_10-
S_L7_20_Contig6578	#15	2861	2567	19.064	2			NTSB-DBLa0.15-CIDRa3.2-DBLd9-	block_20-block_17-block_19-block_4-block_13-block_3-block_54-block_14-block_64-block_5-block_36-block_2-block_12-block_7-block_1-block_34-block_9-block_6-block_68-block_23-block_104-block_63-block_110-block_67-block_316-block_8-block_441-block_1-block_32-block_10-block_241-block_26-block_15-
S_L7_20_Contig6579	#15	2892	4890	35.9267	6	1		DBLd1-CIDRb1-	block_78-block_28-block_49-block_30-block_15-block_35-block_4-block_73-block_11-block_77-block_16-block_3-block_437-block_5-block_29-block_87-block_2-block_12-block_7-block_1-block_72-block_9-block_443-block_6-block_180-block_50-block_22-block_107-block_8-block_1-block_24-block_10-block_31-block_56-block_28-block_21-
S_L7_20_Contig6580	#15	3569	1730	10.2993	8			DBLa0.1-CIDRa3.1-DBLd1-CIDRb1-	block_8-block_159-block_22-block_50-block_243-block_6-block_9-block_1-block_7-block_12-block_2-block_29-block_55-block_5-block_82-block_3-block_16-block_109-block_11-block_106-block_4-block_35-block_15-block_26-block_10-block_32-block_1-block_8-block_333-block_67-block_339-block_63-block_104-block_23-block_68-block_6-block_75-block_9-block_34-block_1-block_7-block_12-
S_L7_20_Contig6581	#15	2965	946	6.77912	78	1		DBLg11-DBLg6-DBLd1-	block_11-block_232-block_3-block_98-block_5-block_90-block_94-block_2-block_1-block_45-block_18-block_612-block_15-block_139-block_4-block_11-block_16-block_3-block_82-block_5-block_133-block_2-block_136-block_1-block_45-block_78-block_28-block_49-block_33-block_26-block_15-block_35-block_4-block_106-block_11-block_77-
S_L7_20_Contig6582	#15	3048	2277	15.8729	29			CIDRg9-DBLz6-DBLe9-	block_1-block_24-block_10-block_31-block_52-block_315-block_4-block_13-block_3-block_5-block_291-block_92-block_2-block_99-block_1-block_534-block_115-block_93-block_18-block_124-block_76-block_4-block_11-block_3-block_5-block_142-block_2-block_48-block_1-block_414-block_78-block_21-block_41-
S_L7_20_Contig6583	#15	3067	570	3.94883	17			DBLg6-DBLg10-DBLd1-	block_2-block_136-block_1-block_45-block_78-block_15-block_139-block_4-block_11-block_16-block_3-block_86-block_5-block_29-block_2-block_1-block_45-block_18-block_26-block_15-block_35-block_4-block_11-block_77-block_16-block_3-block_177-block_27-block_5-block_55-block_29-block_87-block_2-block_12-block_7-
S_L7_20_Contig6584	#15	3183	859	5.73408	3			DBLa0.12-CIDRa2.2-DBLd1-CIDRb5-	block_180-block_6-block_496-block_9-block_1-block_7-block_12-block_2-block_105-block_29-block_448-block_55-block_5-block_27-block_177-block_3-block_16-block_77-block_11-block_81-block_4-block_132-block_35-block_15-block_26-block_49-block_10-block_32-block_1-block_8-block_526-block_57-block_23-block_438-block_6-block_118-block_9-block_70-block_1-block_7-block_12-
S_L7_20_Contig6585	#15	3240	455	2.98382	33	13	PfKE01_040019800 PfCD01_040018200	NTSB-DBLa0.14-CIDRa4-DBLd1-	block_3-block_16-block_158-block_11-block_4-block_35-block_15-block_26-block_394-block_10-block_32-block_1-block_8-block_63-block_23-block_6-block_268-block_9-block_70-block_1-block_7-block_12-block_2-block_153-block_36-block_5-block_345-block_14-block_79-block_3-block_13-block_4-block_19-block_17-block_20-
S_L7_20_Contig6586	#15	3332	1850	11.7971	13			DBLb7-DBLd1-	block_1-block_7-block_12-block_2-block_170-block_29-block_55-block_5-block_27-block_177-block_3-block_16-block_11-block_73-block_4-block_34-block_35-block_15-block_30-block_28-block_49-block_33-block_18-block_61-block_62-block_1-block_59-block_2-block_5-block_14-block_457-block_3-block_266-block_13-block_278-block_4-block_53-block_65-block_52-block_331-
S_L7_20_Contig6587	#15	4186	3318	16.8416	4			DBLa0.6-CIDRa3.1-DBLd1-CIDRb6-	block_8-block_172-block_22-block_50-block_138-block_6-block_361-block_9-block_497-block_1-block_7-block_12-block_2-block_96-block_5-block_253-block_3-block_16-block_77-block_11-block_4-block_35-block_15-block_30-block_26-block_10-block_32-block_292-block_1-block_8-block_67-block_63-block_23-block_68-block_6-block_75-block_9-block_70-block_1-block_7-block_12-block_2-block_60-block_5-block_64-block…
S_L7_20_Contig6588	#15	3435	3878	23.9877	568		PfGN01_070017900	DBLa0.1-CIDRa3.1-DBLd1-CIDRb1-	block_1-block_8-block_159-block_22-block_50-block_6-block_9-block_72-block_1-block_7-block_12-block_2-block_87-block_29-block_55-block_5-block_461-block_27-block_228-block_3-block_16-block_109-block_11-block_4-block_132-block_35-block_15-block_26-block_10-block_32-block_1-block_8-block_67-block_114-block_63-block_208-block_23-block_68-block_6-block_186-block_9-block_34-block_492-block_1-
S_L7_20_Contig6589	#15	3535	747	4.48991	23	2		NTSA-DBLa1.2-CIDRa1.5-DBLg7-DBLd5-	block_264-block_20-block_17-block_19-block_4-block_13-block_3-block_5-block_60-block_2-block_12-block_7-block_1-block_9-block_6-block_150-block_23-block_57-block_8-block_1-block_121-block_10-block_267-block_4-block_11-block_201-block_3-block_82-block_5-block_420-block_2-block_136-block_1-block_45-block_78-block_15-
S_L7_20_Contig6590	#15	3637	4482	26.184	201	5		DBLb7-DBLe13-DBLz2-DBLe4-	block_61-block_18-block_4-block_3-block_260-block_5-block_2-block_48-block_1-block_425-block_45-block_18-block_318-block_4-block_13-block_3-block_5-block_92-block_2-block_403-block_1-block_115-block_93-block_18-block_407-block_76-block_4-block_11-block_3-block_126-block_5-block_293-block_2-block_48-block_1-block_45-
S_L7_20_Contig6591	#15	3747	1137	6.44739	5			DBLb8-DBLd1-CIDRg4-	block_21-block_137-block_56-block_31-block_10-block_24-block_1-block_8-block_83-block_22-block_85-block_103-block_6-block_9-block_122-block_1-block_7-block_12-block_2-block_29-block_301-block_5-block_27-block_3-block_16-block_77-block_11-block_165-block_4-block_35-block_15-block_26-block_18-block_61-block_255-block_62-block_1-block_59-block_2-block_5-
S_L7_20_Contig6592	#15	3775	2645	14.8873	5			CIDRa2.1-DBLg2-DBLd1-CIDRb1-	block_8-block_22-block_50-block_173-block_6-block_443-block_9-block_72-block_1-block_7-block_12-block_2-block_87-block_29-block_55-block_5-block_253-block_3-block_16-block_11-block_106-block_4-block_35-block_15-block_30-block_26-block_426-block_18-block_61-block_62-block_1-block_59-block_2-block_167-block_5-block_86-block_3-block_16-block_11-block_4-block_15-block_26-block_10-
S_L7_20_Contig6593	#15	4068	8783	45.8742	2			DBLa0.13-CIDRa2.8-DBLb5-DBLd1-	block_7-block_12-block_2-block_105-block_424-block_29-block_55-block_5-block_27-block_3-block_16-block_77-block_11-block_4-block_132-block_35-block_15-block_30-block_26-block_49-block_18-block_61-block_62-block_119-block_1-block_59-block_2-block_5-block_436-block_14-block_174-block_3-block_13-block_290-block_4-block_53-block_65-block_52-block_10-block_372-block_32-block_1-block_8-block_57-block_2…
S_L7_20_Contig6594	#15	4981	2290	9.76845	27	1		DBLd1-CIDRb1-DBLg10-DBLe14-DBLe3-	block_2-block_12-block_7-block_1-block_9-block_6-block_243-block_50-block_22-block_83-block_8-block_1-block_24-block_10-block_31-block_56-block_15-block_139-block_4-block_11-block_16-block_3-block_86-block_5-block_29-block_2-block_48-block_1-block_45-block_18-block_76-block_4-block_11-block_3-block_108-block_5-block_142-block_2-block_200-block_97-block_206-block_76-block_4-block_160-block_3-block…
S_L7_20_Contig6595	#15	5352	5000	19.85	23	4		DBLa0.22-CIDRa3.2-DBLb5-DBLg16-DBLd1-	block_1-block_7-block_12-block_2-block_29-block_55-block_5-block_27-block_156-block_3-block_16-block_11-block_507-block_4-block_34-block_35-block_15-block_28-block_257-block_45-block_1-block_136-block_2-block_519-block_5-block_82-block_3-block_11-block_4-block_139-block_15-block_18-block_61-block_209-block_62-block_1-block_382-block_59-block_2-block_5-block_14-block_146-block_3-block_13-block_4-b…
S_L7_20_Contig662	#15	723	5004	147.057	6	5		CIDRb6-	block_24-block_10-block_491-block_31-block_127-block_28-block_21-
S_L7_20_Contig668	#15	505	24	1.00978	9	9		NTSA-DBLa1.4-	block_13-block_4-block_19-block_17-block_20-block_155-
S_L7_20_Contig692	#15	508	52	2.17494				NTSB-	block_525-block_20-block_17-block_19-
S_L7_20_Contig801	#15	869	100	2.44505				NTSB-DBLa0.24-	block_194-block_20-block_17-block_19-block_4-block_13-block_3-block_54-
S_L7_20_Contig824	#15	572	46	1.70871	7	7		DBLa1.7-	block_19-block_4-block_13-block_3-block_54-block_14-block_64-
S_L7_20_Contig934	#15	1010	545	11.4652	2198	1603		DBLd1-	block_15-block_35-block_4-block_11-
S_L7_20_Contig948	#15	1106	51	0.979765	24	21		DBLd3-CIDRg2-	block_1-block_151-block_9-block_6-block_477-block_85-block_22-block_176-block_8-block_533-block_1-block_24-block_10-
S_L7_20_31800	#15	520	88	3.59572	5	5		CIDRg11-	block_31-block_224-block_10-block_24-block_1-block_403-
S_L7_20_31852	#15	526	33	1.33302	3	3		DBLd4-CIDRg10-	block_8-block_83-block_22-block_85-block_103-block_6-block_178-
S_L7_20_31966	#15	546	1184	46.0751				DBLe14-	block_45-block_78-block_95-block_21-block_41-block_43-
S_L7_20_31986	#15	550	1934	74.7138	7	7		CIDRb6-	block_8-block_172-block_22-block_50-block_243-block_6-
S_L7_20_32206	#15	600	30	1.06237	12	12		CIDRb1-	block_31-block_224-block_10-block_24-block_291-block_1-block_8-
S_L7_20_32296	#15	622	27	0.922317				DBLd1-	block_55-block_5-block_27-block_358-block_358-block_3-block_256-block_158-
S_L7_20_32322	#15	629	71	2.39836	5	5		DBLb1-	block_18-block_61-block_62-block_1-block_382-block_59-block_2-block_183-
S_L7_20_32332	#15	632	43	1.44563	6	6		DBLa1.2-	block_618-block_4-block_13-block_3-block_486-block_14-block_5-block_367-block_60-block_2-
S_L7_20_32566	#15	709	215	6.44316	5	5		CIDRpam-DBLpam3-	block_342-block_1-block_329-
S_L7_20_32568	#15	709	146	4.37536	1	1		CIDRpam-DBLpam3-	block_342-block_1-block_329-
S_L7_20_32632	#15	729	320	9.32673	4	3		CIDRb1-	block_1-block_24-block_10-block_31-block_56-block_26-block_341-block_295-block_21-
S_L7_20_32652	#15	737	406	11.7048	1	1		DBLd1-CIDRb5-	block_496-block_6-block_173-block_50-block_22-block_172-block_8-block_1-block_24-
S_L7_20_32758	#15	796	251	6.69989	46	41		DBLg4-	block_16-block_3-block_82-block_5-block_133-block_2-block_99-block_1-block_45-
S_L7_20_32768	#15	800	3573	94.8964	1	1		CIDRb1-CIDRa3.1-	block_1-block_24-block_10-block_31-block_56-block_205-block_157-block_341-block_295-block_21-
S_L7_20_32784	#15	812	171	4.47453				CIDRg5-CIDRg1-	block_1-block_24-block_10-block_195-block_31-block_127-block_33-block_21-
S_L7_20_32798	#15	820	593	15.3655				CIDRb1-	block_21-block_33-block_127-block_31-block_10-block_24-block_1-block_8-
S_L7_20_32828	#15	835	148	3.76602				CIDRg10-	block_8-block_1-block_24-block_10-block_195-block_31-block_56-block_95-block_21-
S_L7_20_32834	#15	838	293	7.429	1			CIDRb1-CIDRa3.4-	block_295-block_341-block_26-block_205-block_56-block_31-block_374-block_10-block_24-block_1-block_8-
S_L7_20_32870	#15	849	80	2.00212	4	4		DBLa0.5-CIDRa2.6-	block_8-block_263-block_63-block_154-block_23-block_143-block_6-block_75-block_9-block_34-block_1-
S_L7_20_32948	#15	900	1341	31.6587	7	1		DBLe10-	block_41-block_21-block_78-block_45-block_1-block_48-block_2-block_142-block_5-block_126-block_3-block_160-
S_L7_20_32974	#15	921	805	18.5713	3	2		DBLd7-CIDRb1-	block_24-block_1-block_8-block_107-block_22-block_50-block_138-block_6-block_9-block_72-
S_L7_20_32978	#15	926	170	3.90072	4	2		CIDRa1.4-DBLb1-	block_317-block_3-block_13-block_319-block_4-block_65-block_52-block_141-block_10-block_121-
S_L7_20_33014	#15	959	434	9.61564	17	2		CIDRb5-	block_21-block_137-block_56-block_31-block_10-block_24-block_1-block_8-block_159-block_22-
S_L7_20_33016	#15	961	64	1.41502	3			DBLa0.1-	block_9-block_34-block_1-block_7-block_12-block_2-block_153-block_36-block_5-block_64-block_14-block_79-block_3-block_102-block_13-
S_L7_20_33032	#15	996	199	4.24522	14	4		CIDRb6-	block_50-block_22-block_172-block_8-block_1-block_24-block_10-block_195-block_31-block_56-block_137-block_21-
S_L7_20_33076	#15	1058	326	6.54695	12	8		DBLg2-	block_62-block_1-block_59-block_2-block_29-block_5-block_86-block_3-block_16-block_11-block_4-block_15-
S_L7_20_33116	#15	1111	1536	29.3754	9	9		DBLd1-CIDRb5-	block_271-block_10-block_24-block_1-block_8-block_107-block_22-block_50-block_138-block_6-block_9-block_72-block_1-
S_L7_20_33120	#15	1113	154	2.9399	8	8		DBLd4-CIDRg7-	block_9-block_483-block_6-block_103-block_85-block_22-block_83-block_8-block_1-block_24-block_10-block_31-
S_L7_20_33122	#15	1113	217	4.14259				DBLb3-DBLb9-	block_331-block_28-block_18-block_61-block_62-block_1-block_59-block_2-block_297-block_5-block_14-block_174-block_3-
S_L7_20_33152_manual_selection	#15	1165	669	12.2013	570	519	PF3D7_0712600		block_43-block_218-block_42-block_112-block_39-block_285-block_40-block_38-block_44-block_46-block_69-block_191-block_47-block_51-
S_L7_20_33158	#15	1189	163	2.91281	8	7		NTSB-DBLa0.23-	block_7-block_12-block_2-block_36-block_5-block_14-block_386-block_3-block_188-block_13-block_4-block_19-block_17-block_20-block_439-
S_L7_20_33216	#15	1323	185	2.97111	10	7	PfKE01_040019400	CIDRa3.2-CIDRa3.1-DBLd1-	block_81-block_4-block_35-block_15-block_30-block_26-block_49-block_10-block_32-block_512-block_1-block_8-block_67-block_114-block_63-block_23-
S_L7_20_33226	#15	1368	341	5.29633	17	12		DBLa1.1-CIDRa1.7-DBLb12-	block_52-block_141-block_10-block_368-block_121-block_1-block_8-block_57-block_23-block_150-block_6-block_399-block_9-block_70-block_1-block_7-block_12-
S_L7_20_33266	#15	1481	2797	40.1277	6			DBLd4-CIDRg7-	block_1-block_122-block_9-block_178-block_6-block_103-block_85-block_22-block_83-block_8-block_1-block_10-block_459-block_31-block_205-block_33-block_21-
S_L7_20_33276	#15	1552	170	2.32736	52	35		CIDRa1.1-DBLb1-	block_1-block_121-block_450-block_10-block_141-block_52-block_65-block_4-block_13-block_3-block_54-block_14-block_64-block_5-block_297-block_2-block_59-block_1-block_119-
S_L7_20_33286	#15	1567	1361	18.4542				DBLd1-CIDRg10-	block_8-block_83-block_22-block_85-block_103-block_6-block_9-block_122-block_1-block_7-block_12-block_2-block_105-block_29-block_249-block_5-block_27-block_3-block_16-block_77-block_11-
S_L7_20_33294	#15	1593	323	4.30818	8	6		DBLb6-DBLg2-DBLg16-	block_61-block_18-block_15-block_139-block_4-block_11-block_16-block_3-block_86-block_5-block_90-block_29-block_2-block_59-block_1-block_62-block_61-block_18-block_15-block_74-
S_L7_20_33300	#15	1618	307	4.0315	1	1		DBLa0.11-CIDRa2.1-	block_32-block_1-block_8-block_57-block_23-block_6-block_9-block_70-block_1-block_7-block_12-block_2-block_36-block_5-block_64-block_14-block_54-block_3-
S_L7_20_33314	#15	1692	2017	25.3287	7	6		DBLb9-DBLg4-	block_45-block_1-block_2-block_133-block_5-block_82-block_3-block_11-block_4-block_74-block_15-block_18-block_61-block_62-block_1-block_59-block_2-block_187-
S_L7_20_33320	#15	1714	219	2.71481	1			NTSB-DBLa0.2-CIDRa3.1-	block_68-block_6-block_75-block_9-block_34-block_492-block_1-block_7-block_12-block_2-block_153-block_36-block_5-block_64-block_14-block_79-block_3-block_135-block_13-block_4-block_471-block_19-block_17-block_20-
S_L7_20_33322	#15	1727	141	1.73474				DBLd1-CIDRg5-	block_21-block_28-block_137-block_31-block_195-block_10-block_24-block_1-block_8-block_83-block_22-block_85-block_103-block_6-block_178-block_9-block_122-block_1-block_7-block_12-block_2-
S_L7_20_33324	#15	1744	160	1.94931				DBLb3-DBLg18-	block_11-block_4-block_139-block_15-block_30-block_61-block_62-block_1-block_2-block_187-block_5-block_14-block_146-block_3-block_13-block_189-block_4-block_53-block_65-
S_L7_20_33332	#15	1775	323	3.86644	1	1		NTSB-DBLa0.16-CIDRa3.1-	block_20-block_17-block_19-block_4-block_13-block_381-block_3-block_79-block_14-block_64-block_5-block_36-block_163-block_2-block_12-block_7-block_1-block_239-block_34-block_9-block_348-block_6-block_68-block_23-
S_L7_20_33354	#15	1991	1076	11.4828	6			DBLd5-CIDRb5-	block_3-block_5-block_167-block_2-block_12-block_7-block_1-block_497-block_9-block_6-block_226-block_50-block_22-block_555-block_8-block_1-block_24-block_10-block_31-block_56-block_205-block_28-block_21-
S_L7_20_33358	#15	2015	380	4.00696	4	3		DBLd1-CIDRb1-DBLg10-	block_3-block_16-block_11-block_4-block_74-block_15-block_56-block_31-block_10-block_24-block_1-block_8-block_159-block_22-block_50-block_180-block_6-block_298-block_9-block_72-block_1-block_7-block_12-block_2-block_105-block_29-
S_L7_20_33416	#15	2477	258	2.2131				DBLa0.12-CIDRa3.2-CIDRa3.1-DBLd1-	block_2-block_12-block_7-block_1-block_70-block_9-block_118-block_6-block_68-block_23-block_480-block_63-block_110-block_67-block_8-block_1-block_32-block_10-block_26-block_30-block_15-block_4-block_11-block_77-block_16-block_3-block_82-block_5-block_55-block_29-
S_L7_20_33422	#15	2576	2222	18.3276	1			DBLa0.19-CIDRa2.3-DBLd1-	block_1-block_34-block_9-block_118-block_6-block_23-block_154-block_57-block_223-block_8-block_1-block_32-block_447-block_10-block_26-block_15-block_35-block_4-block_106-block_11-block_77-block_16-block_3-block_27-block_5-block_55-block_29-block_105-block_2-
S_L7_20_33436	#15	2678	290	2.30088				DBLg5-DBLd1-CIDRg12-	block_167-block_2-block_136-block_1-block_258-block_45-block_257-block_30-block_15-block_35-block_4-block_11-block_77-block_16-block_3-block_252-block_452-block_5-block_55-block_29-block_105-block_2-block_12-block_7-block_1-block_122-block_9-block_483-block_6-block_103-block_85-block_22-block_83-block_8-
S_L7_20_33438	#15	2731	1475	11.4756	1			NTSB-DBLa0.12-CIDRa2.7-DBLd9-	block_20-block_17-block_19-block_4-block_13-block_3-block_54-block_14-block_64-block_5-block_36-block_88-block_2-block_12-block_7-block_1-block_70-block_9-block_6-block_438-block_23-block_57-block_116-block_8-block_1-block_32-block_10-block_49-block_26-block_332-block_15-
S_L7_20_33444	#15	2796	234	1.77822	12			NTSB-DBLa0.4-CIDRa6-DBLd1-	block_20-block_17-block_19-block_4-block_13-block_3-block_79-block_14-block_5-block_36-block_2-block_12-block_7-block_1-block_184-block_9-block_350-block_6-block_23-block_57-block_8-block_1-block_32-block_10-block_26-block_30-block_15-block_35-block_132-block_4-
S_L7_20_33452	#15	2932	271	1.96387	4			DBLa0.12-CIDRa2.2-DBLd1-CIDRb6-	block_9-block_118-block_6-block_251-block_23-block_57-block_8-block_1-block_32-block_10-block_101-block_30-block_15-block_35-block_4-block_81-block_11-block_77-block_16-block_3-block_185-block_5-block_55-block_29-block_442-block_2-block_12-block_7-block_1-block_9-block_6-block_243-block_50-block_22-block_172-block_8-
S_L7_20_33454	#15	2938	4675	33.8093	17	1		DBLb1-DBLg6-CIDRa3.1-DBLd1-	block_249-block_5-block_27-block_3-block_16-block_77-block_11-block_4-block_35-block_15-block_30-block_30-block_26-block_114-block_78-block_45-block_1-block_136-block_2-block_411-block_133-block_5-block_82-block_3-block_16-block_11-block_4-block_74-block_15-block_18-block_61-block_62-block_1-block_250-block_59-block_2-block_187-
S_L7_20_33456	#15	2962	919	6.59231				CIDRa2.1-DBLd1-CIDRb1-	block_56-block_31-block_195-block_10-block_24-block_456-block_1-block_8-block_417-block_22-block_50-block_243-block_6-block_9-block_497-block_1-block_7-block_12-block_2-block_29-block_55-block_5-block_27-block_3-block_16-block_77-block_11-block_106-block_4-block_35-block_15-block_26-block_10-
S_L7_20_33476	#15	3231	421	2.76855				DBLa0.9-CIDRa2.2-DBLd1-	block_19-block_4-block_13-block_3-block_54-block_14-block_64-block_5-block_36-block_2-block_12-block_7-block_1-block_70-block_9-block_118-block_6-block_23-block_57-block_626-block_8-block_1-block_32-block_10-block_49-block_26-block_15-block_35-block_4-block_106-block_11-block_158-block_16-block_3-block_253-block_27-block_5-block_55-block_29-block_105-
S_L7_20_33504	#15	3786	2653	14.8889	15	9	PfKE01_040019700 PfCD01_040018100	NTSB-DBLa0.5-CIDRa2.9-DBLd1-	block_2-block_96-block_55-block_5-block_27-block_3-block_16-block_11-block_81-block_4-block_35-block_15-block_26-block_10-block_372-block_32-block_1-block_472-block_8-block_116-block_57-block_23-block_143-block_6-block_118-block_9-block_34-block_1-block_12-block_2-block_36-block_5-block_64-block_14-block_79-block_3-block_215-block_13-block_4-block_19-block_17-block_20-
S_L7_20_33508	#15	3854	3651	20.1283	20	1		DBLb3-DBLb9-DBLg11-	block_45-block_1-block_48-block_2-block_90-block_5-block_86-block_3-block_16-block_11-block_4-block_74-block_15-block_612-block_18-block_61-block_62-block_1-block_59-block_183-block_5-block_14-block_272-block_3-block_13-block_4-block_53-block_65-block_101-block_18-block_61-block_62-block_1-block_59-block_2-block_2-block_183-block_5-block_14-block_174-block_3-block_13-block_4-block_53-block_65-
S_L7_20_33514	#15	4041	1967	10.3424	7			DBLa0.6-CIDRa3.4-CIDRa3.4-DBLd1-CIDRb1-	block_13-block_215-block_3-block_54-block_14-block_64-block_5-block_36-block_2-block_12-block_7-block_1-block_184-block_9-block_75-block_6-block_68-block_23-block_63-block_8-block_1-block_299-block_32-block_10-block_26-block_30-block_15-block_35-block_4-block_81-block_11-block_237-block_16-block_3-block_156-block_27-block_5-block_55-block_29-block_87-block_2-block_12-block_7-block_1-block_72-bloc…
S_L7_20_33526	#15	4731	3177	14.2683				DBLa0.9-CIDRa2.2-DBLd1-CIDRb1-	block_21-block_137-block_56-block_224-block_10-block_24-block_1-block_8-block_417-block_22-block_50-block_226-block_6-block_9-block_72-block_1-block_7-block_12-block_2-block_105-block_29-block_5-block_27-block_228-block_3-block_16-block_273-block_11-block_4-block_35-block_15-block_26-block_10-block_32-block_1-block_8-block_57-block_23-block_438-block_6-block_9-block_184-block_1-block_7-block_12-b…
S_L7_20_33530	#15	5276	1945	7.83288	12			NTSB-DBLa0.1-CIDRa3.1-DBLd1-CIDRb1-	block_20-block_17-block_19-block_4-block_13-block_3-block_446-block_14-block_345-block_5-block_36-block_88-block_2-block_130-block_7-block_1-block_34-block_9-block_75-block_6-block_68-block_23-block_104-block_63-block_114-block_67-block_8-block_1-block_512-block_32-block_125-block_10-block_49-block_30-block_15-block_35-block_132-block_4-block_517-block_11-block_16-block_3-block_156-block_27-block…
S_L7_20_33536	#15	6521	7157	23.3197	32	2		DBLb13-DBLg12-DBLd5-CIDRb3-DBLb6-DBLg6-CIDRa3.1-	block_21-block_28-block_26-block_26-block_169-block_78-block_45-block_1-block_136-block_2-block_133-block_5-block_82-block_3-block_16-block_11-block_4-block_74-block_15-block_18-block_61-block_62-block_1-block_59-block_2-block_259-block_5-block_14-block_3-block_13-block_4-block_53-block_17-block_52-block_331-block_10-block_24-block_508-block_1-block_8-block_22-block_50-block_6-block_151-block_1-b…
S_L7_20_33540	#15	8198	3049	7.90235	548	23	PfIT_050037800 PfDd2_050037600 PfSD01_050037500	CIDRa1.2-DBLb11-DBLg1-DBLe1-DBLg8-DBLz2-DBLe5-	block_43-block_196-block_41-block_21-block_474-block_274-block_97-block_466-block_200-block_2-block_142-block_5-block_3-block_4-block_76-block_124-block_18-block_93-block_62-block_1-block_99-block_2-block_92-block_275-block_5-block_14-block_3-block_13-block_4-block_318-block_18-block_45-block_1-block_48-block_2-block_133-block_5-block_82-block_3-block_16-block_11-block_4-block_74-block_15-block_5…
S_L7_20_39453	#15	608	852	29.7744	2	2		CIDRb1-	block_24-block_10-block_31-block_56-block_137-block_95-
S_L7_20_39567	#15	634	140	4.69187				DBLb3-	block_62-block_1-block_59-block_2-block_183-block_5-block_14-block_174-
S_L7_20_40005	#15	759	19	0.531886	3	2		CIDRa2.1-	block_10-block_32-block_1-block_8-block_116-block_57-block_23-
S_L7_20_40483	#15	1008	64	1.34904				DBLa2-CIDRa1.1-	block_1-block_70-block_9-block_399-block_6-block_451-block_23-block_57-block_8-block_1-block_121-block_450-block_10-
S_L7_20_40679	#15	1258	180	3.04018	7	4		DBLb1-DBLg17-	block_62-block_255-block_61-block_18-block_15-block_286-block_4-block_11-block_3-block_82-block_5-block_133-block_2-block_59-block_1-block_62-
S_L7_20_53118	#15	690	27	0.831422	33	33		DBLa1.7-CIDRa1.4-	block_9-block_6-block_150-block_23-block_57-block_8-block_1-block_121-
S_L7_20_53906	#15	1051	2212	44.7187	5			CIDRb1-	block_50-block_22-block_159-block_8-block_1-block_24-block_10-block_31-block_56-block_28-block_21-
S_L7_20_72664	#15	797	394	10.5038				CIDRa2.11-CIDRa3.1-DBLd1-	block_8-block_1-block_32-block_10-block_49-block_26-block_332-block_15-
S_L7_20_81797	#15	567	63	2.36083				DBLa0.16-CIDRa3.1-	block_239-block_34-block_9-block_348-block_6-block_68-block_23-block_208-
S_L7_20_82955	#15	2041	637	6.63137	25	9		DBLg18-DBLe14-DBLe3-	block_3-block_160-block_4-block_76-block_206-block_97-block_200-block_2-block_142-block_5-block_108-block_3-block_11-block_4-block_76-block_18-block_45-block_1-block_48-block_2-block_133-
NS_L7_27_Contig1398	#16	2953	37922	277.692	1898		PfKH02_040025700 PfDd2_040025900 PfSD01_070036700 PfHB3_040024700 PfKE01_040027600 PfIT_040025100 PF3D7_0420700 PfKH01_040026100 PfCD01_040026200 PfGB4_040026000 PfKH01_000028300 PfKH01_040026500	CIDRg9-CIDRb6-	block_225-block_24-block_10-block_31-block_26-block_33-block_21-block_41-block_377-block_43-block_218-block_42-block_600-block_39-block_89-block_40-block_38-block_44-block_569-block_46-block_191-block_47-block_51-
NS_L7_27_Contig1505	#16	5072	811	3.45763	19			CIDRa3.1-DBLb4-DBLg2-DBLd1-CIDRb1-	block_1-block_512-block_32-block_10-block_101-block_52-block_65-block_53-block_4-block_189-block_13-block_3-block_174-block_14-block_5-block_2-block_59-block_1-block_119-block_62-block_61-block_18-block_557-block_15-block_74-block_4-block_11-block_16-block_3-block_86-block_5-block_2-block_59-block_1-block_129-block_61-block_18-block_28-block_15-block_35-block_4-block_490-block_106-block_11-block_…
NS_L7_27_Contig185	#16	518	29	1.21061	107	107		DBLa0.8-	block_17-block_19-block_4-block_13-block_188-block_3-
NS_L7_27_Contig1888	#16	1119	102	1.97109	2			NTSB-DBLa0.3-	block_20-block_17-block_19-block_4-block_13-block_381-block_3-block_14-block_5-block_60-block_2-block_7-block_1-
NS_L7_27_Contig1959	#16	3285	17035	112.135	4			DBLa0.15-CIDRa2.5-DBLd1-CIDRb1-	block_9-block_118-block_6-block_143-block_23-block_57-block_263-block_8-block_1-block_32-block_10-block_26-block_30-block_15-block_35-block_132-block_4-block_11-block_158-block_16-block_3-block_27-block_5-block_55-block_29-block_105-block_2-block_12-block_7-block_1-block_72-block_9-block_249-block_6-block_50-block_22-block_159-block_8-
NS_L7_27_Contig2001	#16	600	43	1.54972				CIDRa1.4-DBLb3-	block_1-block_121-block_10-block_141-block_52-block_65-
NS_L7_27_Contig2034	#16	842	321	8.24383	1	1		NTSB-DBLa0.5-	block_20-block_17-block_19-block_4-block_13-block_3-block_79-block_14-
NS_L7_27_Contig2050	#16	4705	8744	40.1871	10			CIDRa3.2-CIDRa3.4-DBLd1-CIDRb1-CIDRa3.3-DBLa0.1-CIDRa3.1-	block_7-block_1-block_34-block_9-block_75-block_6-block_68-block_23-block_208-block_63-block_110-block_67-block_482-block_8-block_441-block_1-block_1-block_32-block_10-block_26-block_26-block_30-block_15-block_35-block_4-block_165-block_11-block_77-block_16-block_3-block_27-block_5-block_90-block_96-block_2-block_12-block_7-block_1-block_72-block_9-block_496-block_6-block_173-block_50-block_22-bl…
NS_L7_27_Contig2163	#16	509	16	0.679733	16	16		DBLg1-	block_11-block_4-block_139-block_15-block_26-block_10-
NS_L7_27_Contig2183	#16	518	18	0.751414	3	3		DBLg11-	block_1-block_59-block_2-block_94-block_5-block_86-
NS_L7_27_Contig2190	#16	530	32	1.3056	4	4		DBLpam1-	block_335-block_115-block_351-block_1-block_312-block_2-
NS_L7_27_Contig2230	#16	972	70	1.55728	1			DBLa1.8-	block_19-block_4-block_13-block_3-block_219-block_14-block_179-block_5-block_367-block_60-block_2-block_12-block_7-block_1-
NS_L7_27_Contig2234	#16	6825	1514	4.79689	70			DBLa1.2-CIDRa1.5-DBLb7-DBLg12-DBLd5-CIDRb4-DBLb9-CIDRa3.4-	block_7-block_1-block_9-block_6-block_150-block_23-block_57-block_8-block_1-block_121-block_10-block_101-block_52-block_127-block_30-block_15-block_74-block_4-block_11-block_16-block_3-block_86-block_5-block_55-block_29-block_2-block_136-block_1-block_45-block_78-block_15-block_4-block_11-block_77-block_16-block_3-block_27-block_5-block_90-block_96-block_2-block_12-block_7-block_1-block_9-block_6…
NS_L7_27_Contig2262	#16	975	63	1.39724	12	11		NTSA-DBLa1.3-	block_20-block_17-block_19-block_4-block_13-block_3-block_219-block_14-block_179-block_5-block_92-
NS_L7_27_Contig2282	#16	694	19	0.592012	2	2		CIDRg3-DBLb2-	block_10-block_141-block_65-block_53-block_4-
NS_L7_27_Contig2285	#16	944	31	0.710111				DBLd1-	block_10-block_49-block_26-block_30-block_15-block_35-block_435-block_4-block_81-block_11-block_16-block_3-
NS_L7_27_Contig2293	#16	576	52	1.95217				DBLg10-	block_45-block_18-block_355-block_21-block_182-
NS_L7_27_Contig2300	#16	1709	138	1.74612	165	28		CIDRa5-DBLb5-	block_10-block_101-block_65-block_4-block_13-block_3-block_174-block_14-block_5-block_183-block_2-block_59-block_250-block_1-block_119-block_62-block_61-block_18-
NS_L7_27_Contig2444	#16	1569	142	1.95705	32			DBLg10-DBLd2-	block_2-block_48-block_1-block_45-block_18-block_15-block_74-block_4-block_11-block_16-block_3-block_82-block_5-block_90-block_2-block_12-block_7-block_1-
NS_L7_27_Contig2493	#16	838	67	1.72889	11	7		CIDRg6-	block_31-block_10-block_24-block_1-block_8-block_83-block_22-block_85-
NS_L7_27_Contig2579	#16	905	57	1.36195				DBLpam1-	block_65-block_302-block_4-block_13-block_3-block_501-block_131-block_5-block_303-block_60-block_2-block_312-block_1-
NS_L7_27_Contig2591	#16	1050	3873	79.7617
NS_L7_27_Contig2629	#16	1034	32	0.669215	7	5		DBLa2-CIDRa1.8-	block_141-block_10-block_450-block_121-block_1-block_8-block_57-block_23-block_150-block_6-block_9-block_70-
NS_L7_27_Contig2669	#16	1200	61	1.09922	267	16		DBLe13-DBLe14-	block_4-block_76-block_18-block_45-block_1-block_2-block_5-block_260-block_3-block_11-block_4-
NS_L7_27_Contig2687	#16	1280	132	2.22998	430	397		DBLz3-DBLe6-	block_14-block_5-block_92-block_2-block_99-block_1-block_592-block_93-block_18-block_124-block_76-block_4-block_11-block_3-
NS_L7_27_Contig2716	#16	3410	464	2.94239	40			CIDRa1.5-DBLg12-DBLd5-CIDRb3-	block_23-block_57-block_8-block_1-block_121-block_10-block_267-block_139-block_4-block_11-block_16-block_3-block_86-block_5-block_133-block_427-block_2-block_136-block_1-block_45-block_78-block_15-block_585-block_4-block_11-block_77-block_3-block_27-block_5-block_90-block_29-block_2-block_12-block_7-block_1-block_151-block_9-block_6-block_50-block_22-block_276-block_8-
NS_L7_27_Contig2802	#16	10115	30285	64.7438	1595	40	PfGB4_050038700 PF3D7_0533100 PfKH01_050037900	NTSA-DBLa1.4-CIDRa1.3-DBLb1-DBLg15-DBLe1-DBLg8-DBLz2-DBLe5-	block_264-block_20-block_17-block_19-block_4-block_13-block_3-block_248-block_14-block_5-block_60-block_2-block_12-block_7-block_1-block_70-block_9-block_6-block_150-block_23-block_57-block_8-block_1-block_121-block_368-block_10-block_141-block_52-block_65-block_53-block_4-block_13-block_3-block_146-block_14-block_5-block_470-block_183-block_2-block_59-block_1-block_62-block_61-block_18-block_15-…
NS_L7_27_Contig329	#16	790	45	1.23175	18	15		DBLd3-	block_3-block_27-block_5-block_90-block_2-block_12-block_7-block_1-block_9-block_6-
NS_L7_27_Contig3645	#16	601	39	1.40322				DBLa1.8-	block_7-block_12-block_2-block_60-block_367-block_5-block_14-block_402-block_3-block_13-
NS_L7_27_Contig3697	#16	674	38	1.21916	2	2		CIDRb1-	block_226-block_50-block_22-block_107-block_8-block_1-block_607-block_24-
NS_L7_27_Contig3881	#16	512	16	0.67575				DBLd1-	block_29-block_55-block_5-block_27-block_419-
NS_L7_27_Contig3898	#16	782	69	1.908	3	2		DBLa0.9-	block_4-block_13-block_3-block_54-block_14-block_64-block_5-block_36-block_88-block_2-block_12-block_7-
NS_L7_27_Contig3916	#16	1646	6528	85.7604	13	1		DBLd1-CIDRb1-	block_12-block_7-block_1-block_72-block_9-block_6-block_138-block_50-block_22-block_159-block_8-block_1-block_24-block_10-block_459-block_56-block_33-block_21-
NS_L7_27_Contig3923	#16	515	30	1.25965				DBLd1-	block_2-block_105-block_29-block_55-block_5-block_27-
NS_L7_27_Contig3936	#16	590	52	1.90585	7	7		CIDRa3.1-	block_6-block_68-block_23-block_208-block_63-block_114-block_67-block_8-block_1-
NS_L7_27_Contig4022	#16	8019	19476	52.5189	52			NTSB-DBLa2-CIDRa1.1-DBLb12-DBLg4-DBLd1-CIDRb1-	block_20-block_17-block_19-block_4-block_13-block_3-block_14-block_5-block_60-block_2-block_7-block_1-block_70-block_9-block_6-block_451-block_23-block_57-block_8-block_1-block_121-block_10-block_141-block_65-block_53-block_4-block_515-block_13-block_234-block_3-block_467-block_14-block_5-block_187-block_2-block_59-block_1-block_62-block_396-block_61-block_18-block_588-block_15-block_74-block_4-b…
NS_L7_27_Contig4078	#16	5045	1673	7.17086	13			NTSB-DBLa0.9-CIDRa2.7-DBLd1-CIDRb1-	block_20-block_17-block_19-block_4-block_13-block_3-block_14-block_210-block_5-block_36-block_2-block_12-block_7-block_1-block_70-block_9-block_6-block_181-block_23-block_57-block_116-block_8-block_1-block_32-block_10-block_340-block_15-block_35-block_34-block_4-block_81-block_81-block_11-block_237-block_16-block_3-block_253-block_27-block_5-block_55-block_29-block_170-block_2-block_12-block_7-bl…
NS_L7_27_Contig4087	#16	759	104	2.96297	1	1		DBLa0.8-CIDRa3.5-	block_8-block_63-block_23-block_68-block_6-block_75-block_9-block_184-
NS_L7_27_Contig4104	#16	759	39	1.11112				CIDRa3.1-CIDRa3.1-DBLd1-	block_32-block_10-block_26-block_30-block_15-block_35-block_4-
NS_L7_27_Contig4118	#16	843	34	0.872143	31	29		CIDRa3.3-CIDRa3.1-DBLd1-	block_32-block_10-block_26-block_30-block_15-block_35-block_4-
NS_L7_27_Contig4125	#16	2565	202	1.70294	1431	2		DBLd9-CIDRg9-	block_16-block_3-block_98-block_5-block_96-block_2-block_12-block_7-block_1-block_9-block_6-block_148-block_22-block_176-block_8-block_1-block_24-block_10-block_31-block_26-block_33-block_21-block_41-block_377-block_43-block_218-block_42-block_600-block_39-
NS_L7_27_Contig4134	#16	1000	42	0.908209	29	27		DBLg2-	block_15-block_139-block_4-block_11-block_232-block_3-block_86-block_5-block_94-block_2-block_59-block_1-block_129-
NS_L7_27_Contig4144	#16	3187	748	5.07523	27	7		DBLg13-DBLz2-DBLe4-	block_5-block_29-block_2-block_48-block_1-block_425-block_45-block_18-block_318-block_4-block_13-block_3-block_5-block_92-block_2-block_403-block_1-block_115-block_93-block_18-block_407-block_76-block_4-block_11-block_3-block_5-block_293-block_2-block_48-block_1-block_45-block_78-block_28-block_21-
NS_L7_27_Contig4147	#16	6538	1858	6.14522	77	6		DBLb7-DBLg12-DBLd4-CIDRg1-DBLz6-DBLe12-	block_1-block_62-block_61-block_18-block_30-block_15-block_74-block_4-block_11-block_16-block_3-block_98-block_5-block_167-block_2-block_136-block_1-block_45-block_78-block_15-block_585-block_4-block_11-block_77-block_16-block_3-block_27-block_5-block_90-block_29-block_2-block_12-block_7-block_1-block_9-block_6-block_148-block_22-block_8-block_1-block_24-block_10-block_31-block_52-block_123-block…
NS_L7_27_Contig4155	#16	5596	6888	26.6165	18			NTSB-DBLa0.18-CIDRa5-DBLb5-DBLg2-DBLd4-	block_20-block_17-block_19-block_4-block_13-block_3-block_171-block_14-block_210-block_5-block_60-block_2-block_7-block_1-block_9-block_6-block_23-block_57-block_8-block_1-block_32-block_10-block_101-block_52-block_17-block_53-block_4-block_290-block_13-block_3-block_436-block_5-block_400-block_2-block_59-block_1-block_119-block_62-block_61-block_18-block_15-block_74-block_4-block_11-block_16-blo…
NS_L7_27_Contig4261	#16	1144	87	1.64448	35	7		DBLa1.7-CIDRa1.4-	block_1-block_70-block_9-block_6-block_150-block_23-block_57-block_8-block_1-block_121-
NS_L7_27_Contig4394	#16	1572	108	1.48562	647		PfHB3_120024400	DBLa0.1-CIDRa3.4-DBLa0.22-	block_17-block_19-block_4-block_13-block_188-block_3-block_14-block_210-block_5-block_36-block_2-block_1-block_34-block_9-block_6-block_68-block_23-
NS_L7_27_Contig4688	#16	2466	265	2.32375	87		PF3D7_0402800 PfIT_040007200	DBLb3-DBLe1-DBLe4-DBLe7-	block_65-block_53-block_4-block_13-block_3-block_544-block_14-block_5-block_380-block_2-block_48-block_45-block_18-block_28-block_81-block_463-block_11-block_5-block_2-block_200-
NS_L7_27_Contig4912	#16	6711	4719	15.2054	15			DBLpam1-DBLpam2-CIDRpam-DBLpam3-DBLepam4-DBLb13-DBLepam5-DBLe10-	block_1-block_351-block_115-block_335-block_13-block_3-block_325-block_14-block_5-block_328-block_2-block_343-block_18-block_344-block_342-block_1-block_329-block_4-block_307-block_484-block_3-block_314-block_5-block_313-block_2-block_306-block_428-block_1-block_305-block_4-block_401-block_11-block_431-block_3-block_311-block_327-block_326-block_2-block_304-block_1-block_310-block_76-block_4-bloc…
NS_L7_27_Contig4968	#16	811	80	2.13307	1475	1327
NS_L7_27_Contig5028	#16	3848	1430	8.03595	76	1		DBLd9-CIDRg6-DBLz6-DBLe6-	block_9-block_6-block_103-block_85-block_22-block_83-block_8-block_1-block_24-block_10-block_31-block_52-block_123-block_235-block_53-block_4-block_13-block_3-block_587-block_131-block_5-block_291-block_92-block_2-block_99-block_1-block_115-block_93-block_18-block_76-block_4-block_11-block_3-block_108-block_5-block_142-block_2-block_48-block_1-block_45-block_78-block_529-block_21-
NS_L7_27_Contig5461	#16	1351	212	3.39326				NTSB-DBLa0.5-	block_1-block_7-block_12-block_2-block_36-block_5-block_64-block_14-block_54-block_3-block_13-block_4-block_19-block_17-block_20-block_525-
NS_L7_27_Contig5583	#16	6379	3170	10.7459	60			DBLb1-DBLb6-DBLg11-DBLg11-DBLd1-	block_55-block_5-block_27-block_177-block_3-block_11-block_4-block_132-block_35-block_15-block_26-block_33-block_18-block_45-block_1-block_48-block_2-block_29-block_5-block_82-block_3-block_16-block_11-block_4-block_15-block_612-block_18-block_45-block_1-block_48-block_2-block_96-block_5-block_98-block_3-block_16-block_11-block_4-block_15-block_18-block_61-block_62-block_1-block_59-block_2-block_…
NS_L7_27_Contig5586	#16	603	27	0.968239	5	5		DBLd4-CIDRg5-	block_122-block_9-block_458-block_6-block_103-block_85-block_22-block_83-block_8-
NS_L7_27_Contig563	#16	7215	1266	3.79432	24	1	PfIT_030029800	DBLa0.11-CIDRa2.2-CIDRa2.2-DBLd1-CIDRb1-DBLe2-DBLz3-DBLe3-	block_1-block_70-block_9-block_118-block_6-block_23-block_57-block_8-block_1-block_32-block_10-block_30-block_15-block_35-block_4-block_11-block_406-block_16-block_3-block_27-block_5-block_55-block_29-block_170-block_2-block_12-block_7-block_1-block_72-block_9-block_6-block_180-block_50-block_22-block_8-block_1-block_24-block_10-block_31-block_261-block_4-block_11-block_3-block_265-block_5-block_…
NS_L7_27_Contig5907	#16	1114	336	6.52214				NTSB-DBLa0.11-	block_71-block_20-block_17-block_19-block_4-block_13-block_215-block_3-block_171-block_14-block_64-block_5-block_36-block_88-block_2-
NS_L7_27_Contig5952	#16	501	34	1.4675				CIDRa3.5-	block_68-block_23-block_63-block_8-block_1-
NS_L7_27_Contig5955	#16	503	21	0.902792	4	4		DBLa1.8-	block_2-block_60-block_367-block_5-block_179-block_14-block_486-block_3-block_13-
NS_L7_27_Contig5966	#16	508	22	0.936473				DBLd1-	block_2-block_12-block_7-block_1-block_72-block_9-block_361-
NS_L7_27_Contig5979_manual_selection	#16	532	45	1.8291	324	324			block_38-block_40-block_117-block_39-block_84-block_164-block_42-
NS_L7_27_Contig6032	#16	2093	362	3.74003	1			NTSB-DBLa0.21-CIDRa2.1-	block_20-block_17-block_19-block_4-block_13-block_3-block_54-block_14-block_5-block_36-block_2-block_12-block_7-block_1-block_70-block_9-block_268-block_6-block_181-block_23-block_57-block_116-block_8-block_1-
NS_L7_27_Contig6048	#16	700	22	0.679612	42	40		DBLa0.22-CIDRa3.1-	block_63-block_23-block_68-block_6-block_245-block_75-block_9-block_34-block_492-block_1-
NS_L7_27_Contig6055	#16	738	55	1.61155				CIDRa3.2-DBLd1-	block_4-block_34-block_35-block_15-block_26-block_49-block_10-block_32-
NS_L7_27_Contig6057	#16	775	43	1.19978				CIDRa4-CIDRa2.7-DBLd1-	block_32-block_10-block_49-block_26-block_15-block_35-block_4-
NS_L7_27_Contig6060	#16	788	80	2.19533	7			CIDRb5-	block_21-block_95-block_56-block_31-block_10-block_24-block_1-block_8-
NS_L7_27_Contig6065	#16	1443	104	1.55849	7	2		DBLa1.7-CIDRa1.4-	block_3-block_54-block_14-block_5-block_60-block_2-block_12-block_7-block_1-block_70-block_9-block_6-block_150-block_23-block_57-block_8-block_1-
NS_L7_27_Contig6069_manual_selection	#16	836	73	1.88822	4	4			block_25-block_43-block_41-block_21-block_33-block_254-block_56-block_31-
NS_L7_27_Contig6070	#16	2024	203	2.16881	6	3		DBLd1-CIDRb5-	block_10-block_24-block_1-block_8-block_417-block_22-block_50-block_138-block_6-block_244-block_9-block_1-block_7-block_12-block_2-block_87-block_29-block_55-block_5-block_82-block_3-block_16-block_11-block_4-
NS_L7_27_Contig6072	#16	1269	1762	30.0248				DBLe3-DBLg18-	block_346-block_346-block_21-block_78-block_45-block_1-block_48-block_2-
NS_L7_27_Contig6075	#16	873	243	6.01906				NTSB-DBLa0.5-	block_71-block_20-block_17-block_19-block_4-block_13-block_3-
NS_L7_27_Contig6078	#16	889	84	2.04321				DBLd1-	block_35-block_34-block_4-block_81-block_73-block_11-block_16-block_3-block_156-block_27-block_398-block_5-block_90-
NS_L7_27_Contig6084	#16	910	2644	62.8285	4	4		DBLd4-CIDRg1-	block_9-block_178-block_6-block_148-block_22-block_522-block_8-block_1-block_24-
NS_L7_27_Contig6092	#16	1147	93	1.7533	2			NTSB-DBLa0.12-	block_7-block_12-block_2-block_163-block_36-block_5-block_161-block_14-block_54-block_3-block_13-block_4-block_19-block_17-block_20-
NS_L7_27_Contig6093	#16	4631	7865	36.7249	8			NTSB-DBLa0.16-CIDRa3.4-DBLd1-CIDRg7-	block_20-block_17-block_19-block_4-block_13-block_3-block_54-block_14-block_64-block_5-block_36-block_163-block_2-block_12-block_7-block_1-block_184-block_9-block_348-block_6-block_68-block_23-block_104-block_63-block_110-block_67-block_333-block_8-block_1-block_299-block_32-block_10-block_26-block_30-block_15-block_35-block_4-block_11-block_296-block_16-block_3-block_27-block_5-block_55-block_29…
NS_L7_27_Contig6097	#16	1223	7963	140.795	2	1		DBLd1-CIDRb1-	block_2-block_12-block_7-block_1-block_72-block_9-block_443-block_6-block_180-block_50-block_22-block_159-block_8-block_1-block_24-block_10-
NS_L7_27_Contig6099	#16	4251	4018	20.4388	19			DBLa0.21-CIDRa2.1-DBLd1-CIDRg2-	block_12-block_7-block_1-block_70-block_9-block_413-block_6-block_181-block_23-block_57-block_116-block_8-block_1-block_32-block_10-block_26-block_30-block_15-block_35-block_4-block_11-block_77-block_16-block_3-block_185-block_82-block_5-block_55-block_29-block_2-block_12-block_7-block_1-block_122-block_9-block_178-block_6-block_477-block_85-block_22-block_176-block_8-block_1-block_24-block_10-bl…
NS_L7_27_Contig6100	#16	1916	182	2.05406	9			DBLb3-DBLg18-	block_141-block_52-block_65-block_53-block_4-block_189-block_13-block_3-block_146-block_14-block_5-block_187-block_2-block_1-block_62-block_61-block_26-block_30-block_15-block_74-block_4-block_11-block_16-
NS_L7_27_Contig6105	#16	1431	243	3.672				DBLa0.12-CIDRa2.1-DBLb5-	block_1-block_70-block_9-block_118-block_6-block_23-block_57-block_626-block_8-block_1-block_32-block_10-block_65-block_53-
NS_L7_27_Contig6107	#16	1592	816	11.0837	3			DBLg10-	block_31-block_56-block_15-block_74-block_4-block_11-block_16-block_3-block_98-block_5-block_2-block_59-block_1-block_45-block_18-block_355-block_21-
NS_L7_27_Contig6108	#16	2044	357	3.7768	2			DBLa0.18-CIDRa6-DBLb5-	block_53-block_65-block_101-block_10-block_32-block_1-block_8-block_57-block_150-block_6-block_413-block_9-block_70-block_1-block_7-block_12-block_2-block_60-block_5-block_64-block_14-block_54-block_3-
NS_L7_27_Contig6111	#16	2088	321	3.32438	293	253	PfSN01_060037800 PfKH02_060005800	DBLe14-DBLe3-	block_21-block_294-block_28-block_78-block_414-block_1-block_48-block_2-block_222-block_5-block_126-block_3-block_160-block_4-block_76-block_206-block_97-block_200-block_2-block_142-block_5-block_3-
NS_L7_27_Contig6112	#16	4437	9187	44.7735	3			NTSB-DBLa0.17-CIDRa3.1-DBLd1-	block_20-block_17-block_19-block_4-block_13-block_3-block_204-block_14-block_5-block_36-block_88-block_2-block_130-block_7-block_1-block_34-block_9-block_186-block_6-block_68-block_23-block_63-block_110-block_67-block_8-block_1-block_292-block_32-block_125-block_10-block_26-block_30-block_15-block_35-block_4-block_469-block_11-block_77-block_16-block_3-block_252-block_452-block_561-block_5-block_…
NS_L7_27_Contig6113	#16	2001	2073	22.4021	1			DBLd1-CIDRb5-	block_137-block_127-block_31-block_207-block_10-block_24-block_1-block_8-block_22-block_50-block_138-block_6-block_9-block_1-block_7-block_12-block_2-block_29-block_55-block_5-
NS_L7_27_Contig6114	#16	2085	228	2.36464	2			DBLd1-CIDRb1-	block_4-block_73-block_11-block_77-block_16-block_3-block_27-block_5-block_55-block_29-block_87-block_2-block_12-block_7-block_1-block_72-block_9-block_6-block_243-block_50-block_22-block_159-block_8-block_1-block_24-
NS_L7_27_Contig6116	#16	4887	21406	94.7173	1			NTSB-DBLa0.11-CIDRa2.4-DBLb5-NTSB-DBLd1-	block_20-block_17-block_19-block_4-block_13-block_381-block_3-block_79-block_14-block_64-block_5-block_36-block_153-block_2-block_12-block_7-block_1-block_70-block_9-block_413-block_6-block_57-block_116-block_8-block_1-block_32-block_10-block_347-block_52-block_65-block_53-block_4-block_13-block_495-block_3-block_14-block_436-block_5-block_499-block_2-block_59-block_1-block_62-block_209-block_61-…
NS_L7_27_Contig6117	#16	2893	933	6.9738	36	3		CIDRb3-DBLb6-DBLg9-	block_579-block_59-block_2-block_411-block_5-block_3-block_16-block_11-block_4-block_74-block_15-block_18-block_61-block_62-block_1-block_59-block_2-block_297-block_5-block_14-block_174-block_3-block_13-block_4-block_53-block_65-block_52-block_331-block_10-block_24-block_1-block_8-
NS_L7_27_Contig6118	#16	3004	500	3.5992	37	6		DBLa0.7-CIDRa4-DBLd1-CIDRb5-	block_12-block_7-block_1-block_34-block_9-block_596-block_6-block_68-block_23-block_63-block_67-block_8-block_1-block_32-block_10-block_26-block_15-block_35-block_4-block_81-block_11-block_77-block_16-block_3-block_5-block_55-block_369-block_2-block_12-block_7-block_1-block_9-block_6-
NS_L7_27_Contig6120	#16	5204	10373	43.1026	6			NTSB-DBLa0.1-CIDRa3.3-DBLd1-CIDRb1-	block_20-block_17-block_19-block_4-block_13-block_233-block_3-block_54-block_14-block_210-block_5-block_36-block_2-block_130-block_7-block_1-block_34-block_9-block_75-block_6-block_23-block_63-block_67-block_8-block_441-block_1-block_32-block_10-block_26-block_15-block_35-block_4-block_11-block_16-block_3-block_228-block_27-block_5-block_55-block_29-block_509-block_2-block_12-block_7-block_1-bloc…
NS_L7_27_Contig6121	#16	6202	20753	72.3578	104	1	PfGN01_030030400	NTSB-DBLa0.3-CIDRa5-DBLb4-DBLg13-DBLe4-	block_20-block_17-block_19-block_4-block_13-block_3-block_204-block_14-block_5-block_36-block_2-block_12-block_7-block_1-block_34-block_9-block_75-block_6-block_23-block_57-block_8-block_1-block_32-block_10-block_101-block_52-block_65-block_53-block_4-block_13-block_3-block_174-block_14-block_5-block_400-block_2-block_59-block_250-block_1-block_119-block_61-block_18-block_15-block_139-block_4-blo…
NS_L7_27_Contig6373	#16	1149	78	1.46795	1709			CIDRa3.4-DBLd1-	block_3-block_16-block_109-block_11-block_4-block_35-block_15-block_10-block_32-block_1-
NS_L7_27_Contig6493	#16	2275	303	2.88003	1			DBLa0.14-CIDRa4-CIDRa3.1-DBLd1-	block_4-block_13-block_135-block_3-block_524-block_14-block_5-block_36-block_153-block_2-block_12-block_7-block_1-block_70-block_9-block_268-block_6-block_23-block_208-block_63-block_8-block_1-block_32-block_10-block_26-block_332-block_15-block_35-
NS_L7_27_Contig6663	#16	824	7309	191.808				CIDRb5-CIDRg9-	block_1-block_607-block_24-block_10-block_195-block_31-block_56-block_127-block_28-block_21-block_41-
NS_L7_27_Contig6681	#16	1066	13372	271.254				CIDRb5-DBLz5-CIDRb5-	block_6-block_138-block_50-block_22-block_172-block_8-block_1-block_24-block_10-block_31-block_56-
NS_L7_27_Contig6691	#16	1109	7769	151.485	4	2		DBLd1-CIDRb1-	block_96-block_409-block_2-block_12-block_7-block_1-block_9-block_6-block_500-block_50-block_22-block_287-block_287-block_8-block_1-
NS_L7_27_Contig6888	#16	528	57	2.33441					block_182-block_21-block_30-block_56-block_31-block_207-block_10-
NS_L7_27_Contig6898_manual_selection	#16	554	1273	49.6884	9	9			block_10-block_491-block_31-block_30-block_95-block_21-
NS_L7_27_Contig6917	#16	576	415	15.5798	1	1		DBLa0.19-CIDRa2.3-	block_9-block_118-block_6-block_150-block_23-block_154-
NS_L7_27_Contig6921	#16	583	41	1.52073	2024	2024
NS_L7_27_Contig6922	#16	584	99	3.66571				DBLb8-DBLd1-	block_61-block_18-block_49-block_26-block_30-block_15-block_35-
NS_L7_27_Contig6934	#16	616	1375	48.2679	7	7		DBLd1-CIDRb1-	block_8-block_159-block_22-block_50-block_6-block_9-block_1-
NS_L7_27_Contig6942	#16	637	548	18.6028				CIDRg1-	block_24-block_10-block_31-block_56-block_137-block_21-block_41-
NS_L7_27_Contig6950	#16	837	6159	159.119				DBLd1-	block_27-block_5-block_55-block_29-block_87-block_2-block_12-block_7-block_1-block_497-block_9-
NS_L7_27_Contig6960	#16	688	439	13.7979				DBLd1-	block_27-block_5-block_249-block_29-block_87-block_2-block_12-block_7-block_1-
NS_L7_27_Contig6963	#16	702	261	8.0397				CIDRa3.3-CIDRa3.1-DBLd1-	block_32-block_10-block_49-block_26-block_30-block_15-block_35-block_4-
NS_L7_27_Contig6965	#16	1246	111	1.92638	3	1		DBLa0.22-CIDRa3.1-	block_12-block_7-block_1-block_492-block_34-block_9-block_75-block_6-block_68-block_23-block_63-block_26-block_67-block_8-block_1-
NS_L7_27_Contig6968	#16	723	64	1.91416				CIDRb6-	block_1-block_24-block_10-block_31-block_56-block_30-block_366-block_21-
NS_L7_27_Contig6969	#16	714	309	9.35829	1	1		DBLa0.16-CIDRa3.4-	block_8-block_482-block_67-block_339-block_63-block_23-block_68-block_6-block_348-block_9-
NS_L7_27_Contig6972	#16	724	1940	57.9428					block_10-block_31-block_56-block_205-block_26-block_341-block_295-block_21-block_182-
NS_L7_27_Contig6975	#16	762	64	1.81619				DBLb5-	block_61-block_209-block_62-block_1-block_59-block_2-block_499-block_5-block_14-block_467-block_3-
NS_L7_27_Contig6979	#16	869	101	2.51326	25			CIDRa3.1-DBLd1-	block_35-block_15-block_26-block_10-block_32-block_1-block_8-
NS_L7_27_Contig6980	#16	760	351	9.98688	8	8		CIDRb3-	block_21-block_376-block_127-block_31-block_10-block_24-block_1-
NS_L7_27_Contig6983	#16	776	2863	79.7803	3	3		CIDRb1-	block_24-block_1-block_8-block_287-block_22-block_50-block_149-block_6-
NS_L7_27_Contig6996	#16	871	3554	88.2339				CIDRb3-	block_21-block_28-block_137-block_127-block_31-block_10-block_24-block_1-block_8-
NS_L7_27_Contig6999	#16	862	120	3.0103				DBLa0.15-CIDRa3.2-	block_8-block_354-block_67-block_110-block_63-block_104-block_23-block_68-block_6-block_75-block_9-block_34-block_1-
NS_L7_27_Contig7004	#16	914	164	3.88002				CIDRb5-	block_182-block_21-block_28-block_28-block_56-block_31-block_10-block_24-block_1-
NS_L7_27_Contig7007	#16	1056	148	3.03064	1	1		NTSB-DBLa0.1-	block_2-block_88-block_36-block_5-block_14-block_54-block_3-block_13-block_4-block_19-block_17-block_20-block_525-
NS_L7_27_Contig7008	#16	956	105	2.37502	105	103		DBLd1-CIDRb1-	block_31-block_10-block_24-block_1-block_8-block_159-block_22-block_50-block_138-block_6-
NS_L7_27_Contig7009	#16	1004	72	1.55073				DBLa0.22-CIDRa3.3-	block_1-block_8-block_67-block_114-block_63-block_208-block_23-block_68-block_6-block_245-block_75-block_9-block_34-block_1-
NS_L7_27_Contig7010	#16	4248	558	2.84044	21			DBLa0.1-CIDRa3.2-DBLd1-CIDRb5-	block_21-block_33-block_205-block_31-block_195-block_10-block_24-block_1-block_8-block_172-block_22-block_50-block_226-block_6-block_9-block_1-block_7-block_12-block_2-block_55-block_5-block_27-block_3-block_16-block_11-block_4-block_34-block_35-block_15-block_30-block_30-block_49-block_10-block_240-block_32-block_334-block_1-block_8-block_67-block_114-block_63-block_104-block_23-block_68-block_6…
NS_L7_27_Contig7012	#16	1214	2826	50.3373
NS_L7_27_Contig7015	#16	1050	832	17.1345	2			CIDRg12-	block_8-block_1-block_423-block_24-block_10-block_31-block_56-block_28-block_21-
NS_L7_27_Contig7017	#16	1069	3861	78.1013				DBLd1-	block_7-block_12-block_2-block_105-block_5-block_398-block_27-block_359-block_3-block_16-block_262-block_11-block_81-block_4-
NS_L7_27_Contig7018	#16	1074	1527	30.7448	6			DBLd4-CIDRg1-	block_1-block_122-block_9-block_178-block_6-block_148-block_22-block_522-block_8-block_1-block_24-block_10-
NS_L7_27_Contig7019	#16	1168	1575	29.1591	6	1		NTSB-DBLa0.1-	block_20-block_17-block_19-block_471-block_4-block_13-block_135-block_3-block_386-block_14-block_210-block_5-block_36-block_163-block_2-block_12-
NS_L7_27_Contig702	#16	7564	9991	28.5623	43	4		NTSA-DBLa1.8-CIDRb2-DBLg7-DBLe11-DBLz2-DBLe6-	block_21-block_95-block_78-block_45-block_1-block_48-block_2-block_213-block_5-block_3-block_11-block_4-block_76-block_124-block_18-block_93-block_115-block_1-block_2-block_92-block_5-block_14-block_3-block_13-block_4-block_318-block_78-block_45-block_1-block_48-block_2-block_5-block_3-block_11-block_4-block_18-block_45-block_1-block_48-block_2-block_420-block_5-block_82-block_3-block_11-block_4-…
NS_L7_27_Contig7021	#16	1109	1124	21.9165	4			DBLd1-CIDRb6-	block_31-block_412-block_10-block_24-block_1-block_8-block_172-block_22-block_50-block_138-block_6-block_244-block_9-block_497-block_1-
NS_L7_27_Contig7022	#16	1116	273	5.28975	1	1		DBLd1-CIDRb6-	block_8-block_172-block_22-block_50-block_173-block_6-block_9-block_72-block_1-block_7-block_12-block_2-block_29-block_55-
NS_L7_27_Contig7023	#16	1295	892	14.8947	4	3		NTSB-DBLa0.6-	block_7-block_130-block_2-block_36-block_5-block_64-block_14-block_79-block_3-block_13-block_4-block_19-block_17-block_20-
NS_L7_27_Contig7024	#16	1202	200	3.59801	3			DBLd1-	block_4-block_11-block_77-block_16-block_3-block_27-block_5-block_324-block_55-block_29-block_87-block_2-block_12-block_7-block_1-
NS_L7_27_Contig7025	#16	1220	500	8.8623	11	8		CIDRb6-	block_50-block_22-block_172-block_8-block_1-block_24-block_10-block_31-block_127-block_33-block_21-
NS_L7_27_Contig7026	#16	1242	290	5.04909				NTSB-DBLa0.16-	block_7-block_12-block_2-block_36-block_5-block_210-block_14-block_54-block_3-block_215-block_13-block_4-block_19-block_17-block_20-
NS_L7_27_Contig7027	#16	1248	550	9.52981				DBLd1-	block_10-block_246-block_26-block_593-block_530-block_15-block_35-block_236-block_4-block_11-block_273-block_256-block_3-block_156-
NS_L7_27_Contig7028	#16	1263	205	3.50984				DBLd1-CIDRb7-	block_3-block_358-block_27-block_5-block_96-block_2-block_12-block_7-block_1-block_72-block_9-block_361-block_6-block_226-block_50-block_22-
NS_L7_27_Contig7029	#16	1432	5881	88.8064	1			DBLd5-CIDRb4-	block_96-block_2-block_12-block_7-block_1-block_9-block_6-block_22-block_107-block_8-block_1-block_24-block_10-block_31-
NS_L7_27_Contig7030	#16	1310	383	6.32214	2			DBLa0.1-CIDRa3.3-	block_32-block_1-block_8-block_67-block_114-block_63-block_104-block_23-block_68-block_6-block_75-block_9-block_34-block_1-block_7-block_130-block_2-
NS_L7_27_Contig7031	#16	7415	13267	38.6899	13			DBLb5-DBLg10-DBLd4-CIDRg2-DBLg3-DBLz4-	block_53-block_4-block_13-block_3-block_14-block_436-block_5-block_400-block_2-block_59-block_1-block_119-block_62-block_61-block_18-block_15-block_4-block_11-block_16-block_3-block_86-block_5-block_94-block_2-block_48-block_1-block_45-block_18-block_15-block_4-block_11-block_77-block_16-block_3-block_177-block_27-block_5-block_96-block_2-block_12-block_7-block_1-block_9-block_6-block_22-block_17…
NS_L7_27_Contig7033	#16	1369	964	15.2268	2	1		NTSB-DBLa0.15-	block_34-block_1-block_7-block_12-block_2-block_88-block_36-block_5-block_64-block_14-block_79-block_3-block_381-block_13-block_4-block_19-block_17-block_20-
NS_L7_27_Contig7034	#16	1410	3838	58.8603				DBLd5-CIDRb5-CIDRa3.4-	block_6-block_138-block_50-block_22-block_172-block_8-block_1-block_24-block_10-block_31-block_77-block_21-
NS_L7_27_Contig7035	#16	1489	3186	46.2687	1	1		NTSB-DBLa0.5-	block_71-block_20-block_17-block_19-block_4-block_13-block_215-block_3-block_171-block_14-block_161-block_5-block_36-block_2-block_12-block_7-block_1-block_34-
NS_L7_27_Contig7037	#16	1510	492	7.0457	160	109	PfGB4_080013900	DBLd1-CIDRb1-	block_9-block_6-block_505-block_50-block_22-block_417-block_8-block_1-block_24-block_10-block_491-block_31-block_127-block_21-block_182-
NS_L7_27_Contig7038	#16	1515	162	2.31227	1	1		CIDRa1.7-DBLb3-DBLa1.1-CIDRa1.7-	block_65-block_52-block_141-block_10-block_121-block_1-block_8-block_57-block_23-block_150-block_6-block_399-block_9-block_70-block_1-block_7-block_2-
NS_L7_27_Contig7039	#16	3516	1078	6.62989	16			CIDRa3.2-DBLd1-CIDRb1-	block_33-block_56-block_31-block_10-block_24-block_1-block_8-block_555-block_22-block_50-block_226-block_6-block_244-block_9-block_72-block_1-block_7-block_12-block_2-block_29-block_55-block_5-block_27-block_358-block_3-block_16-block_158-block_11-block_73-block_4-block_35-block_15-block_10-block_32-block_512-block_1-block_8-
NS_L7_27_Contig7040	#16	1908	916	10.3813				DBLd1-CIDRg1-	block_73-block_11-block_77-block_16-block_3-block_573-block_27-block_5-block_55-block_29-block_170-block_2-block_12-block_7-block_1-block_122-block_9-block_178-block_6-block_148-block_22-block_384-block_8-block_1-block_24-
NS_L7_27_Contig7043	#16	2016	3072	32.9509				NTSB-DBLa0.5-CIDRa2.5-	block_20-block_17-block_19-block_4-block_13-block_188-block_3-block_79-block_14-block_161-block_5-block_36-block_163-block_2-block_12-block_7-block_1-block_239-block_9-block_75-block_6-block_251-block_23-block_154-
NS_L7_27_Contig7045	#16	4160	10385	53.9821	3			NTSB-DBLa0.6-CIDRa3.1-CIDRa3.1-DBLd1-	block_20-block_17-block_19-block_4-block_13-block_102-block_3-block_54-block_14-block_5-block_36-block_2-block_130-block_7-block_1-block_34-block_9-block_75-block_245-block_6-block_68-block_23-block_63-block_288-block_67-block_8-block_1-block_334-block_32-block_10-block_26-block_30-block_15-block_35-block_4-block_81-block_11-block_296-block_16-block_3-block_510-block_27-block_5-block_55-block_29-…
NS_L7_27_Contig7046	#16	2279	858	8.14103				DBLa0.12-CIDRa2.6-CIDRa3.4-DBLg9-	block_579-block_48-block_2-block_29-block_55-block_5-block_86-block_3-block_232-block_11-block_4-block_286-block_15-block_26-block_49-block_10-block_32-block_1-block_472-block_8-block_116-block_57-block_71-block_23-block_143-block_6-block_118-block_9-
NS_L7_27_Contig7048	#16	2576	673	5.64944	7		PF3D7_1100100	DBLd1-CIDRb1-	block_35-block_4-block_11-block_77-block_16-block_3-block_228-block_27-block_398-block_5-block_249-block_29-block_87-block_2-block_12-block_7-block_1-block_72-block_9-block_6-block_138-block_50-block_22-block_107-block_8-block_1-block_456-block_24-block_10-block_31-block_56-block_28-block_21-
NS_L7_27_Contig7049	#16	2605	1598	13.2649	1			CIDRa3.4-DBLd1-CIDRg10-	block_8-block_83-block_22-block_85-block_103-block_6-block_178-block_9-block_122-block_1-block_7-block_12-block_2-block_87-block_29-block_55-block_5-block_27-block_3-block_16-block_77-block_11-block_106-block_4-block_35-block_15-block_332-block_26-block_10-block_372-block_32-block_299-block_1-
NS_L7_27_Contig7051	#16	2820	2283	17.5062	6			DBLg10-DBLd1-CIDRb6-	block_45-block_18-block_30-block_15-block_35-block_4-block_11-block_16-block_3-block_27-block_5-block_55-block_29-block_105-block_2-block_12-block_7-block_1-block_9-block_244-block_6-block_50-block_22-block_172-block_8-block_1-block_24-block_10-block_224-block_31-block_56-block_205-block_33-block_21-
NS_L7_27_Contig7052	#16	3439	7149	44.952	2			CIDRa2.3-CIDRa3.1-DBLd1-CIDRb3-CIDRa3.3-	block_57-block_116-block_8-block_1-block_32-block_10-block_26-block_30-block_15-block_35-block_4-block_73-block_11-block_289-block_16-block_3-block_27-block_5-block_249-block_29-block_105-block_2-block_12-block_7-block_1-block_9-block_443-block_6-block_226-block_50-block_22-block_8-block_1-block_24-block_10-block_31-block_56-
NS_L7_27_Contig7053	#16	3121	610	4.22642	17	2		CIDRg2-DBLz6-DBLe9-	block_41-block_21-block_78-block_45-block_1-block_48-block_2-block_213-block_5-block_108-block_3-block_11-block_4-block_76-block_124-block_18-block_93-block_115-block_534-block_343-block_2-block_92-block_559-block_5-block_14-block_587-block_3-block_385-block_13-block_4-block_53-block_235-block_123-block_52-block_31-block_10-block_24-block_1-block_533-block_8-block_83-block_22-
NS_L7_27_Contig7054	#16	2986	483	3.49779	3	2		NTSB-DBLa0.11-CIDRa4-DBLd1-	block_4-block_35-block_15-block_26-block_10-block_32-block_1-block_8-block_67-block_63-block_391-block_23-block_6-block_9-block_70-block_1-block_7-block_12-block_2-block_36-block_5-block_179-block_14-block_54-block_3-block_188-block_13-block_4-block_19-block_17-block_20-
NS_L7_27_Contig7055	#16	3289	11401	74.9575	1			NTSB-DBLa0.12-CIDRa2.3-DBLd1-	block_5-block_82-block_3-block_16-block_77-block_11-block_165-block_4-block_35-block_15-block_26-block_10-block_527-block_32-block_1-block_8-block_57-block_23-block_251-block_6-block_118-block_9-block_184-block_1-block_7-block_12-block_2-block_36-block_5-block_64-block_14-block_54-block_3-block_13-block_4-block_19-block_17-block_20-
NS_L7_27_Contig7056	#16	3326	3051	19.8361	7			DBLb8-DBLg5-DBLd5-	block_13-block_3-block_272-block_14-block_5-block_2-block_59-block_1-block_62-block_61-block_18-block_15-block_74-block_4-block_11-block_16-block_3-block_86-block_5-block_167-block_2-block_136-block_1-block_45-block_257-block_33-block_15-block_74-block_4-block_11-block_77-block_16-block_3-block_82-block_5-block_55-block_96-block_2-block_12-block_7-block_1-
NS_L7_27_Contig7057	#16	4560	8147	38.634	6			DBLa0.16-CIDRa3.4-DBLd1-CIDRb1-CIDRa3.1-	block_21-block_33-block_56-block_31-block_10-block_24-block_1-block_8-block_107-block_22-block_50-block_180-block_6-block_9-block_72-block_1-block_7-block_12-block_2-block_105-block_29-block_369-block_55-block_5-block_27-block_3-block_16-block_11-block_165-block_4-block_35-block_15-block_30-block_26-block_10-block_615-block_32-block_1-block_8-block_67-block_288-block_63-block_104-block_23-block_6…
NS_L7_27_Contig7058	#16	3666	17895	105.554	9			CIDRa2.3-DBLd1-CIDRb1-	block_21-block_28-block_56-block_31-block_10-block_24-block_607-block_1-block_8-block_107-block_22-block_50-block_173-block_6-block_504-block_9-block_497-block_1-block_7-block_12-block_2-block_29-block_301-block_5-block_561-block_27-block_177-block_437-block_3-block_16-block_237-block_11-block_165-block_507-block_4-block_35-block_15-block_30-block_101-block_10-block_125-block_32-block_1-block_8-b…
NS_L7_27_Contig7059	#16	4075	21740	115.363	11			DBLa0.1-CIDRa3.2-DBLd1-CIDRb1-	block_1-block_184-block_9-block_75-block_6-block_68-block_23-block_208-block_63-block_114-block_67-block_8-block_1-block_292-block_32-block_10-block_30-block_15-block_35-block_4-block_165-block_11-block_289-block_16-block_3-block_228-block_27-block_5-block_29-block_170-block_2-block_12-block_7-block_1-block_72-block_9-block_6-block_180-block_50-block_22-block_417-block_8-block_445-block_1-block_2…
NS_L7_27_Contig7060	#16	4105	4160	21.9137	3			NTSB-DBLa0.15-CIDRa3.2-DBLd1-	block_7-block_12-block_2-block_105-block_29-block_55-block_5-block_487-block_3-block_16-block_109-block_11-block_81-block_4-block_35-block_15-block_26-block_10-block_32-block_1-block_8-block_333-block_67-block_110-block_63-block_23-block_68-block_6-block_75-block_9-block_34-block_320-block_1-block_7-block_12-block_2-block_36-block_5-block_14-block_79-block_3-block_13-block_4-block_19-block_17-blo…
NS_L7_27_Contig7061	#16	4263	3774	19.1436	22			DBLa0.5-CIDRa2.5-DBLb8-DBLd1-	block_27-block_156-block_3-block_16-block_237-block_11-block_4-block_35-block_15-block_30-block_26-block_18-block_61-block_209-block_62-block_1-block_59-block_2-block_499-block_5-block_14-block_467-block_3-block_13-block_4-block_53-block_65-block_52-block_10-block_32-block_1-block_8-block_116-block_63-block_154-block_23-block_143-block_6-block_118-block_9-block_184-block_1-block_7-block_12-block_…
NS_L7_27_Contig7062	#16	5281	7744	31.7092	10			NTSB-DBLa0.12-CIDRa2.2-DBLd1-CIDRb1-	block_20-block_17-block_19-block_4-block_13-block_188-block_3-block_54-block_14-block_210-block_5-block_36-block_2-block_12-block_7-block_1-block_70-block_9-block_118-block_6-block_23-block_57-block_8-block_1-block_32-block_10-block_26-block_15-block_35-block_4-block_73-block_11-block_77-block_16-block_3-block_27-block_5-block_29-block_105-block_2-block_12-block_7-block_1-block_72-block_9-block_4…
NS_L7_27_Contig7063	#16	5707	2350	8.90423	37			DBLb3-DBLb3-DBLg11-DBLd1-CIDRb3-	block_297-block_2-block_2-block_59-block_1-block_62-block_61-block_18-block_52-block_65-block_53-block_4-block_13-block_3-block_174-block_14-block_5-block_59-block_1-block_62-block_61-block_18-block_557-block_15-block_74-block_4-block_11-block_16-block_3-block_98-block_5-block_167-block_2-block_1-block_45-block_18-block_28-block_26-block_15-block_35-block_34-block_4-block_11-block_262-block_16-bl…
NS_L7_27_Contig7064	#16	5193	7035	29.2942	4			NTSB-DBLa0.5-CIDRa2.9-DBLb5-DBLd1-	block_2-block_87-block_29-block_55-block_5-block_27-block_185-block_3-block_16-block_77-block_11-block_81-block_4-block_35-block_15-block_26-block_49-block_18-block_61-block_62-block_1-block_59-block_2-block_5-block_146-block_3-block_13-block_4-block_53-block_65-block_52-block_10-block_32-block_1-block_8-block_116-block_63-block_154-block_23-block_143-block_6-block_118-block_9-block_34-block_1-bl…
NS_L7_27_Contig7065	#16	5222	16846	69.7584				DBLb5-CIDRa3.4-DBLd1-CIDRb1-	block_28-block_71-block_10-block_394-block_49-block_73-block_506-block_132-block_52-block_65-block_53-block_4-block_13-block_3-block_174-block_14-block_5-block_183-block_2-block_59-block_1-block_62-block_209-block_61-block_18-block_26-block_30-block_15-block_35-block_34-block_4-block_106-block_11-block_273-block_16-block_3-block_27-block_5-block_55-block_29-block_170-block_2-block_12-block_7-bloc…
NS_L7_27_Contig7066	#16	6139	5121	18.0382	26			DBLb3-DBLg2-DBLg4-CIDRa3.1-DBLd1-CIDRb1-	block_24-block_1-block_8-block_159-block_22-block_50-block_243-block_6-block_9-block_72-block_1-block_7-block_12-block_2-block_87-block_29-block_55-block_5-block_27-block_3-block_16-block_575-block_11-block_4-block_132-block_35-block_15-block_26-block_30-block_26-block_26-block_18-block_45-block_1-block_48-block_2-block_133-block_5-block_82-block_3-block_16-block_11-block_4-block_74-block_15-bloc…
NS_L7_27_Contig854	#16	834	90	2.33353	147	143		DBLe6-	block_108-block_5-block_142-block_2-block_48-block_1-block_45-block_78-block_21-
NS_L7_27_30985	#16	808	142	3.80026	7			CIDRb5-	block_21-block_95-block_56-block_31-block_10-block_24-block_1-block_8-
NS_L7_27_31397	#16	1161	81	1.50865	37	35		DBLa0.22-CIDRa3.1-	block_12-block_7-block_1-block_492-block_34-block_9-block_75-block_245-block_6-block_68-block_23-block_63-block_110-block_67-block_333-block_8-block_1-
NS_L7_27_31479	#16	1340	282	4.55073	12	5		DBLa0.21-CIDRa2.1-	block_10-block_32-block_1-block_8-block_116-block_57-block_23-block_181-block_6-block_413-block_9-block_70-block_1-block_7-block_12-block_2-
NS_L7_27_31487	#16	1359	5750	91.4923	4			DBLd4-CIDRg1-	block_21-block_28-block_56-block_31-block_10-block_24-block_1-block_8-block_522-block_22-block_148-block_6-block_178-block_9-block_1-
NS_L7_27_31551	#16	1547	844	11.7975	3			DBLg10-	block_31-block_56-block_15-block_74-block_4-block_11-block_16-block_3-block_98-block_5-block_2-block_59-block_1-block_45-block_18-block_355-block_21-
NS_L7_27_31683	#16	2265	593	5.66139	29	8	PfIT_030029800	DBLz3-DBLe3-	block_21-block_294-block_78-block_45-block_1-block_48-block_2-block_222-block_5-block_126-block_3-block_160-block_4-block_76-block_124-block_18-block_93-block_62-block_1-block_99-block_2-block_92-block_476-block_5-block_14-block_574-block_3-block_13-block_4-
NS_L7_27_31689	#16	2294	2670	25.1683	1			DBLd1-CIDRb5-	block_21-block_137-block_127-block_31-block_207-block_10-block_24-block_1-block_8-block_22-block_50-block_138-block_6-block_9-block_1-block_7-block_12-block_2-block_29-block_55-block_5-block_27-
NS_L7_27_31719	#16	2625	418	3.44337	2			NTSB-DBLa0.12-CIDRa2.1-DBLb5-	block_4-block_53-block_65-block_10-block_32-block_1-block_8-block_626-block_57-block_23-block_6-block_118-block_9-block_70-block_1-block_7-block_12-block_2-block_163-block_36-block_5-block_161-block_14-block_54-block_3-block_13-block_4-block_19-block_17-block_20-
NS_L7_27_31737	#16	2922	1001	7.40782	36	3		CIDRb3-DBLb6-DBLg9-	block_8-block_1-block_24-block_10-block_331-block_52-block_65-block_53-block_4-block_13-block_3-block_174-block_14-block_5-block_297-block_2-block_59-block_1-block_62-block_61-block_18-block_15-block_74-block_4-block_11-block_16-block_3-block_5-block_411-block_2-block_59-block_579-
NS_L7_27_55710	#16	1043	42	0.870766	7	5		DBLa2-CIDRa1.8-	block_141-block_10-block_450-block_121-block_1-block_8-block_57-block_23-block_150-block_6-block_9-block_70-
NS_L7_27_55774	#16	1098	1586	31.2347	6			DBLd4-CIDRg1-	block_122-block_9-block_178-block_6-block_148-block_22-block_522-block_8-block_1-block_24-block_10-block_271-
NS_L7_27_72314	#16	539	173	6.94055				DBLd1-	block_35-block_4-block_73-block_11-block_289-block_16-block_3-
NS_L7_27_72648	#16	578	117	4.37718				DBLd1-	block_15-block_35-block_4-block_81-block_11-block_289-block_16-block_3-
NS_L7_27_73980	#16	916	20	0.47214	28			DBLb13-DBLg10-	block_18-block_557-block_15-block_74-block_4-block_11-block_232-block_3-block_86-block_5-block_94-block_2-block_59-
NS_L7_27_82940	#16	515	338	14.1921				CIDRg12-	block_24-block_10-block_224-block_31-block_56-block_33-
NS_L7_27_83680	#16	620	10	0.348774				CIDRa2.2-CIDRa2.7-	block_32-block_10-block_26-block_15-
NS_L1_73_100577	#17	1432	265	3.79578				NTSB-DBLa0.5-	block_20-block_17-block_19-block_4-block_13-block_215-block_3-block_79-block_14-block_64-block_5-block_36-block_2-block_12-block_7-block_1-block_395-block_34-
NS_L1_73_101761	#17	1800	175	1.99418	2			CIDRa2.1-DBLd1-	block_8-block_1-block_32-block_10-block_506-block_15-block_35-block_34-block_4-block_73-block_11-block_77-block_16-block_3-block_27-block_487-block_5-block_29-block_87-block_2-
NS_L1_73_103591	#17	5100	1492	6.00064				DBLa0.9-CIDRa2.1-DBLd1-CIDRg7-	block_378-block_20-block_17-block_19-block_4-block_13-block_215-block_3-block_79-block_14-block_64-block_5-block_36-block_2-block_12-block_7-block_1-block_70-block_9-block_118-block_6-block_181-block_23-block_57-block_8-block_1-block_32-block_10-block_49-block_506-block_15-block_35-block_4-block_11-block_77-block_16-block_3-block_27-block_5-block_29-block_498-block_2-block_12-block_7-block_1-bloc…
NS_L1_73_103605	#17	5554	5964	22.0257	3			NTSB-DBLa0.9-CIDRa2.4-DBLd1-CIDRg7-	block_20-block_17-block_19-block_4-block_13-block_3-block_171-block_14-block_64-block_5-block_36-block_88-block_2-block_12-block_7-block_1-block_34-block_9-block_6-block_181-block_23-block_57-block_8-block_1-block_32-block_10-block_49-block_506-block_15-block_35-block_4-block_73-block_11-block_77-block_16-block_3-block_253-block_27-block_5-block_55-block_29-block_105-block_2-block_12-block_7-bloc…
NS_L1_73_125900	#17	577	21	0.746521				DBLa0.11-	block_2-block_163-block_36-block_5-block_64-block_14-block_54-block_3-block_102-block_13-
NS_L1_73_132078	#17	792	47	1.21723	1			CIDRb5-	block_50-block_22-block_172-block_8-block_1-block_24-block_10-block_231-block_31-
NS_L1_73_138112	#17	1346	365	5.5622	7	3		NTSB-DBLa0.15-	block_1-block_7-block_12-block_2-block_153-block_493-block_36-block_5-block_161-block_14-block_79-block_3-block_135-block_13-block_4-block_19-block_17-block_20-
NS_L1_73_234202	#17	985	66	1.37438				DBLd1-	block_35-block_4-block_11-block_109-block_16-block_3-block_27-block_503-block_5-block_55-block_29-block_105-
NS_L1_73_240972	#17	2072	135	1.33642	2	2		DBLg3-DBLz4-	block_21-block_280-block_18-block_93-block_283-block_1-block_99-block_2-block_92-block_284-block_5-block_14-block_3-block_462-block_13-block_4-block_53-block_338-block_123-block_52-block_18-block_45-block_1-
NS_L1_73_262696	#17	530	4	0.154804				DBLg2-	block_1-block_59-block_2-block_94-block_609-block_5-block_27-
NS_L1_73_271506	#17	701	13	0.380386				DBLg2-	block_29-block_609-block_5-block_86-block_3-block_275-block_11-block_4-block_15-
NS_L1_73_273099	#17	991	651	13.4743	1			DBLa0.16-	block_2-block_153-block_36-block_5-block_64-block_14-block_54-block_3-block_215-block_13-block_4-block_19-block_17-block_20-
NS_L1_73_286889	#17	2162	176	1.66977	689		PfKE01_050037100	DBLg3-DBLz1-DBLe5-	block_1-block_45-block_18-block_52-block_123-block_338-block_53-block_4-block_13-block_462-block_3-block_14-block_5-block_549-block_92-block_2-block_99-block_1-block_115-block_93-block_18-block_124-block_76-block_4-block_475-block_11-block_3-block_126-block_5-block_142-
NS_L1_73_Contig10741	#17	974	46	0.968718	1			DBLb12-DBLg6-	block_11-block_4-block_139-block_15-block_18-block_61-block_396-block_62-block_1-block_59-block_2-block_187-block_5-
NS_L1_73_Contig10859	#17	1755	178	2.08037	3	2		CIDRa2.7-DBLg13-	block_6-block_143-block_23-block_57-block_116-block_8-block_1-block_32-block_10-block_340-block_15-block_74-block_4-block_11-block_16-block_3-block_86-block_5-block_29-block_2-block_48-
NS_L1_73_Contig11256	#17	5274	10686	41.5598	2			NTSB-DBLa0.11-CIDRa2.4-DBLd1-CIDRb1-	block_71-block_20-block_17-block_19-block_4-block_13-block_3-block_54-block_14-block_64-block_5-block_36-block_153-block_2-block_12-block_7-block_1-block_70-block_9-block_6-block_181-block_116-block_8-block_1-block_32-block_10-block_26-block_30-block_15-block_35-block_4-block_81-block_11-block_77-block_16-block_3-block_437-block_177-block_27-block_5-block_55-block_29-block_2-block_12-block_7-bloc…
NS_L1_73_Contig11339	#17	1185	51	0.882776	12	2		DBLg2-CIDRpam-	block_26-block_49-block_49-block_28-block_18-block_61-block_129-block_1-block_59-block_2-block_94-block_609-block_5-
NS_L1_73_Contig11553	#17	543	22	0.831039				DBLpam2-	block_13-block_620-block_3-block_325-block_14-block_5-block_328-block_2-
NS_L1_73_Contig11872	#17	596	29	0.998046				CIDRa2.4-	block_49-block_10-block_32-block_1-block_8-
NS_L1_73_Contig12266	#17	541	35	1.327				DBLd1-	block_156-block_27-block_5-block_55-block_29-block_105-block_2-block_12-
NS_L1_73_Contig12776	#17	549	39	1.45711	5	5		DBLb6-	block_13-block_3-block_174-block_14-block_5-block_589-block_2-
NS_L1_73_Contig13365	#17	603	28	0.952444	2	2		DBLd1-CIDRb6-	block_1-block_9-block_244-block_6-block_226-block_50-block_22-block_83-
NS_L1_73_Contig13443	#17	3616	310	1.75846	15			CIDRa4-DBLd1-CIDRb1-	block_23-block_63-block_8-block_1-block_32-block_10-block_26-block_15-block_35-block_4-block_11-block_109-block_16-block_3-block_27-block_503-block_5-block_55-block_29-block_105-block_2-block_12-block_7-block_1-block_9-block_496-block_6-block_243-block_50-block_22-block_8-block_1-block_24-block_10-block_606-block_31-block_56-block_95-
NS_L1_73_Contig13497	#17	5606	9151	33.4822	5			NTSB-DBLa0.15-CIDRa2.9-DBLd1-CIDRb5-	block_20-block_17-block_19-block_4-block_13-block_3-block_54-block_14-block_64-block_5-block_36-block_153-block_2-block_12-block_7-block_1-block_34-block_9-block_75-block_6-block_143-block_23-block_154-block_63-block_263-block_8-block_1-block_299-block_32-block_10-block_26-block_30-block_15-block_35-block_4-block_106-block_11-block_273-block_16-block_3-block_27-block_5-block_55-block_96-block_2-b…
NS_L1_73_Contig13523	#17	574	12	0.428813	3	3		CIDRg9-	block_1-block_24-block_10-block_521-block_31-block_261-
NS_L1_73_Contig13537	#17	1317	114	1.77549	6	5		DBLd5-CIDRb1-	block_151-block_9-block_6-block_50-block_22-block_8-block_1-block_24-block_10-block_31-block_56-block_33-block_21-
NS_L1_73_Contig13563	#17	1089	52	0.979432	14	10		DBLg10-	block_74-block_4-block_11-block_275-block_3-block_86-block_5-block_94-block_2-block_48-block_1-block_45-block_18-
NS_L1_73_Contig13754	#17	2109	280	2.7232				DBLd1-CIDRb1-	block_30-block_15-block_35-block_4-block_11-block_16-block_3-block_27-block_5-block_55-block_29-block_87-block_2-block_12-block_7-block_1-block_72-block_9-block_6-block_180-block_50-block_22-block_159-block_8-block_1-
NS_L1_73_Contig13897	#17	628	26	0.849205	1	1		DBLb12-	block_141-block_52-block_65-block_53-block_4-block_13-block_266-block_3-
NS_L1_73_Contig13928	#17	607	38	1.28408	27	27		DBLe4-	block_21-block_95-block_78-block_45-block_1-block_48-block_2-block_293-block_5-
NS_L1_73_Contig14625	#17	830	53	1.30977	5	1		DBLb13-DBLd1-DBLd1-	block_2-block_59-block_1-block_62-block_61-block_18-block_26-block_15-
NS_L1_73_Contig15567	#17	783	46	1.20502	60	55		DBLg5-	block_86-block_5-block_133-block_2-block_136-block_1-block_258-block_45-block_257-
NS_L1_73_Contig15740	#17	1565	87	1.14026				DBLd1-	block_7-block_12-block_2-block_29-block_90-block_5-block_27-block_3-block_16-block_237-block_11-block_165-block_357-block_4-block_35-block_15-block_26-block_28-block_28-
NS_L1_73_Contig15929	#17	840	18	0.439533				CIDRa3.1-DBLd3-	block_1-block_32-block_10-block_26-block_30-block_15-block_35-
NS_L1_73_Contig15951	#17	1944	178	1.87812	29	19		CIDRg2-DBLg9-	block_8-block_1-block_24-block_10-block_15-block_139-block_4-block_11-block_232-block_3-block_86-block_5-block_90-block_167-block_2-block_48-block_1-block_45-block_18-block_21-block_21-
NS_L1_73_Contig16684	#17	1022	37	0.742591	2	2		DBLa0.12-	block_9-block_70-block_1-block_7-block_12-block_2-block_60-block_5-block_210-block_14-block_54-block_3-block_13-block_4-
NS_L1_73_Contig17232	#17	1216	68	1.14703	1	1		DBLb8-	block_52-block_65-block_408-block_4-block_584-block_13-block_3-block_317-block_14-block_5-block_2-block_59-block_604-block_1-
NS_L1_73_Contig18938	#17	5242	7725	30.2274	578	82	PfKE01_050037100	NTSA-DBLa1.1-CIDRa1.2-DBLb11-DBLg1-DBLe1-	block_264-block_20-block_17-block_19-block_4-block_13-block_513-block_3-block_219-block_14-block_5-block_60-block_2-block_12-block_7-block_1-block_70-block_9-block_399-block_6-block_150-block_23-block_57-block_8-block_1-block_121-block_10-block_141-block_65-block_53-block_4-block_189-block_13-block_234-block_3-block_457-block_14-block_5-block_605-block_183-block_2-block_59-block_604-block_1-block…
NS_L1_73_Contig19492	#17	936	61	1.33676	5	3		DBLd1-	block_16-block_3-block_156-block_27-block_5-block_55-block_29-block_87-block_2-block_12-block_7-block_1-block_72-
NS_L1_73_Contig23760	#17	569	37	1.33379				DBLd1-	block_15-block_35-block_236-block_4-block_11-block_77-
NS_L1_73_Contig24199	#17	1035	93	1.84307	1			DBLa0.11-CIDRa4-	block_3-block_54-block_14-block_64-block_5-block_36-block_163-block_2-block_12-block_7-block_1-block_70-block_9-block_268-block_6-
NS_L1_73_Contig24410	#17	578	22	0.780717	1	1		DBLd1-	block_35-block_15-block_26-block_134-block_49-block_33-block_26-
NS_L1_73_Contig24461	#17	858	94	2.24719	66	64		CIDRb1-	block_418-block_21-block_95-block_205-block_31-block_224-block_10-block_24-block_1-
NS_L1_73_Contig24842	#17	542	47	1.77868				CIDRa2.8-DBLd1-	block_10-block_26-block_15-block_35-
NS_L1_73_Contig24909	#17	561	21	0.767812	1	1		CIDRb5-	block_50-block_22-block_172-block_8-block_1-block_24-
NS_L1_73_Contig25047	#17	814	41	1.03314	12	12		CIDRa5-DBLb2-	block_1-block_32-block_10-block_101-block_52-block_65-block_53-block_558-block_4-block_278-block_13-
NS_L1_73_Contig25062	#17	793	61	1.57781	4	4		DBLd1-CIDRb1-	block_1-block_8-block_107-block_22-block_50-block_6-block_504-block_9-block_72-block_1-
NS_L1_73_Contig25075	#17	1429	270	3.87552	4			DBLd1-CIDRb1-	block_72-block_9-block_244-block_6-block_138-block_50-block_22-block_8-block_1-block_24-block_10-block_31-block_56-block_137-block_21-
NS_L1_73_Contig25106	#17	625	42	1.37838	1	1		DBLb8-DBLg13-	block_1-block_62-block_61-block_18-block_15-block_4-
NS_L1_73_Contig25126	#17	634	85	2.74997				CIDRa3.1-	block_23-block_208-block_63-block_110-block_67-block_482-block_8-block_1-
NS_L1_73_Contig25134	#17	771	84	2.23472	6	1		DBLd5-	block_2-block_29-block_90-block_5-block_27-block_358-block_3-block_16-block_77-block_11-block_4-
NS_L1_73_Contig25217	#17	761	57	1.53635				CIDRg5-	block_1-block_24-block_10-block_31-block_56-block_28-block_21-block_41-
NS_L1_73_Contig25451	#17	866	55	1.3027				DBLa0.12-CIDRa2.3-	block_1-block_8-block_57-block_154-block_23-block_143-block_6-block_118-block_9-block_70-block_1-
NS_L1_73_Contig25459	#17	1327	5349	82.68	2	1		DBLd1-CIDRb1-	block_72-block_9-block_6-block_180-block_50-block_22-block_107-block_8-block_1-block_24-block_10-block_31-block_33-block_21-
NS_L1_73_Contig25541	#17	1008	88	1.79069	26	21		DBLe6-	block_3-block_5-block_213-block_2-block_48-block_1-block_45-block_78-block_95-block_21-block_41-block_128-
NS_L1_73_Contig25556	#17	1015	246	4.97127				DBLd1-CIDRb1-	block_2-block_12-block_7-block_1-block_72-block_9-block_6-block_180-block_50-block_22-block_107-block_8-block_1-
NS_L1_73_Contig25563	#17	1033	57	1.13181				DBLg9-	block_3-block_27-block_5-block_2-block_59-block_1-block_45-block_18-block_355-block_21-
NS_L1_73_Contig25575	#17	1061	73	1.41126			PfCD01_030007800 PfKH01_030007300 PfDd2_030007400 PF3D7_0302300 PfGN01_030008000 PfHB3_030006200 PfIT_030007200 PfSD01_030007500 PfKH02_030007900	DBLg11-	block_3-block_98-block_5-block_90-block_94-block_2-
NS_L1_73_Contig25585	#17	3010	398	2.71216	13	1		DBLd5-CIDRb3-DBLe4-	block_3-block_27-block_5-block_90-block_29-block_2-block_166-block_7-block_1-block_9-block_6-block_50-block_22-block_8-block_1-block_508-block_24-block_10-block_76-block_4-block_11-block_3-block_126-block_5-block_2-block_200-block_45-block_78-block_21-block_41-
NS_L1_73_Contig25601	#17	1106	49	0.90874				DBLd1-DBLd1-	block_15-block_35-block_4-block_81-block_11-block_77-block_16-block_3-block_27-block_5-block_90-block_29-block_2-block_12-block_7-
NS_L1_73_Contig25669	#17	1308	59	0.925216	9			CIDRa4-DBLd1-	block_11-block_4-block_35-block_15-block_30-block_26-block_246-block_10-block_32-block_1-block_8-block_63-block_23-
NS_L1_73_Contig25815	#17	3627	575	3.25176	40	1		DBLg13-DBLz3-DBLe12-	block_11-block_16-block_3-block_86-block_5-block_468-block_167-block_2-block_48-block_1-block_45-block_18-block_315-block_4-block_13-block_3-block_574-block_14-block_5-block_92-block_2-block_99-block_1-block_62-block_93-block_18-block_124-block_76-block_4-block_11-block_3-block_5-block_142-block_2-block_200-block_97-block_274-block_21-block_41-block_128-
NS_L1_73_Contig2688	#17	1076	70	1.33439	9	6		DBLg13-DBLg2-	block_28-block_18-block_61-block_129-block_1-block_59-block_2-block_29-block_90-block_5-block_86-block_3-block_16-block_11-
NS_L1_73_Contig27405	#17	568	15	0.541678				DBLd7-	block_96-block_468-block_5-block_98-block_3-block_16-block_77-block_11-block_4-
NS_L1_73_Contig29054	#17	781	36	0.945475	3	2		CIDRa2.2-	block_10-block_32-block_1-block_8-block_57-block_23-
NS_L1_73_Contig29271	#17	1141	74	1.33029	2			DBLd1-	block_2-block_96-block_5-block_27-block_3-block_16-block_77-block_11-block_4-block_35-block_15-block_30-block_26-
NS_L1_73_Contig29889	#17	576	37	1.31758				DBLa0.11-CIDRa2.4-	block_116-block_57-block_23-block_6-block_118-block_9-block_70-
NS_L1_73_Contig30492	#17	644	40	1.27401	23	21		DBLe2-	block_5-block_265-block_3-block_383-block_11-block_4-block_261-
NS_L1_73_Contig30635	#17	545	14	0.526902	354	354		CIDRg1-	block_33-block_31-block_10-block_24-
NS_L1_73_Contig3092	#17	961	61	1.30198	6	1		DBLd1-	block_87-block_29-block_55-block_5-block_461-block_27-block_3-block_16-block_158-block_11-block_106-block_4-
NS_L1_73_Contig31022	#17	558	15	0.551386	2	2		DBLd1-	block_30-block_15-block_35-block_4-
NS_L1_73_Contig31229	#17	590	25	0.869134	10	10		DBLpam1-	block_13-block_3-block_501-block_131-block_5-block_303-block_60-block_2-block_312-
NS_L1_73_Contig31334	#17	605	15	0.508551	2	2		CIDRa4-DBLb5-	block_1-block_32-block_10-block_101-block_52-block_65-
NS_L1_73_Contig32275	#17	1440	84	1.19651	14			DBLg11-DBLb2-DBLg2-	block_231-block_2-block_59-block_1-block_119-block_62-block_61-block_18-block_15-block_286-block_4-block_11-block_16-block_3-block_86-block_5-block_94-block_2-
NS_L1_73_Contig32562	#17	1010	67	1.36067	37	10		DBLe2-DBLe4-	block_5-block_3-block_11-block_4-block_76-block_45-block_1-block_48-block_2-block_415-
NS_L1_73_Contig32574	#17	1019	30	0.603873	77	70	PfGB4_110006800	DBLg7-DBLe11-	block_3-block_11-block_4-block_261-block_18-block_45-block_1-block_48-block_2-block_420-
NS_L1_73_Contig34444	#17	557	16	0.589201	1	1		NTSB-DBLa0.13-	block_20-block_17-block_19-block_4-block_13-block_360-
NS_L1_73_Contig34905	#17	548	29	1.08547					block_73-
NS_L1_73_Contig35078	#17	5429	6231	23.5416	7			NTSB-DBLa0.5-CIDRa2.3-DBLd1-CIDRb1-	block_71-block_20-block_17-block_19-block_4-block_13-block_215-block_3-block_79-block_14-block_161-block_5-block_36-block_163-block_2-block_12-block_7-block_1-block_239-block_9-block_118-block_6-block_251-block_23-block_57-block_223-block_8-block_472-block_1-block_32-block_125-block_10-block_26-block_157-block_30-block_15-block_35-block_4-block_11-block_77-block_3-block_228-block_27-block_5-block…
NS_L1_73_Contig35158	#17	949	80	1.72911	2	2		DBLd1-CIDRb5-	block_2-block_12-block_7-block_1-block_72-block_9-block_6-block_243-block_50-block_22-block_172-block_8-block_1-
NS_L1_73_Contig35193	#17	574	74	2.64435	4	4		CIDRb5-	block_21-block_33-block_56-block_31-block_10-block_24-
NS_L1_73_Contig35226	#17	953	38	0.81788	9	9		CIDRpam-DBLpam3-	block_484-block_307-block_4-block_329-block_1-block_342-
NS_L1_73_Contig35271	#17	605	56	1.89859				DBLa0.10-	block_4-block_19-block_17-block_20-block_378-
NS_L1_73_Contig35284	#17	1108	1216	22.5109	1	1		DBLa0.23-	block_20-block_17-block_19-block_4-block_13-block_188-block_3-block_79-block_14-block_5-block_36-block_2-
NS_L1_73_Contig35313	#17	646	35	1.11131				CIDRa2.4-DBLd1-	block_4-block_35-block_15-block_26-block_10-
NS_L1_73_Contig35347	#17	5808	8433	29.782				NTSB-DBLa0.5-CIDRa2.9-DBLd1-CIDRb6-	block_194-block_20-block_17-block_19-block_4-block_13-block_3-block_79-block_14-block_5-block_36-block_2-block_12-block_7-block_1-block_9-block_75-block_6-block_143-block_23-block_154-block_57-block_116-block_8-block_1-block_532-block_32-block_10-block_15-block_35-block_4-block_11-block_77-block_16-block_3-block_228-block_27-block_487-block_5-block_55-block_29-block_409-block_2-block_12-block_7-b…
NS_L1_73_Contig35401	#17	1039	91	1.79649				DBLd1-	block_1-block_7-block_12-block_2-block_87-block_29-block_55-block_5-block_487-block_3-block_16-block_77-
NS_L1_73_Contig35423	#17	797	93	2.39344				DBLd1-	block_11-block_296-block_256-block_3-block_177-block_27-block_5-block_55-
NS_L1_73_Contig35445	#17	1078	46	0.875261	7			DBLpam3-DBLepam4-	block_305-block_1-block_428-block_306-block_2-block_313-block_5-block_314-block_3-block_484-block_307-block_4-
NS_L1_73_Contig35465	#17	918	81	1.80984	69	59		DBLd1-CIDRb1-	block_2-block_12-block_7-block_1-block_72-block_9-block_6-block_138-block_50-block_22-block_107-block_8-
NS_L1_73_Contig35518	#17	1130	104	1.88779				DBLd1-	block_4-block_11-block_158-block_16-block_3-block_359-block_27-block_5-block_55-block_29-block_87-block_2-block_12-block_7-block_1-
[truncated: 4,593 more rows]

## Sheet: Sheet2
NS_L1_100577	NS_L1_73_100577
NS_L1_100612	NS_L1_84_100612
NS_L1_100768	NS_L1_84_100768
NS_L1_100823	NS_L1_80_100823
NS_L1_101119	NS_L1_80_101119
[truncated: 6,436 more rows]

## Sheet: Sheet1
NS_L1_100577	NS_L1_100577	NS_L1_73_100577
[truncated: 6,440 more rows]
