# Supplementary material for: Gene expression profiling of malaria parasites reveals common virulence gene expression in adult first-time infected patients and severe cases
Source: bioRxiv preprint, doi:10.1101/2020.11.13.381137, version 3 (2021-03-23)
Supplement: Table S11 [file 381137_file28.xlsx]

## Sheet: Summary
		severe (s) vs non-severe (ns)	naive (n) vs pre-exposed (p)			Position D1	Position D1	Position D2	Position D2	Position D2	Position D2	Position D3	Position D3	Position D3	Position D3	Position D3		Position D4	Position D4	Position D4	Position D4	Position D4	Position D4	Position D4	Position D4	Position D5	Position D5	Position D5	Position D5	Position D5	Position D5	Position D5	Position D5	Position D6	Position D6	Position D6	Position D6	Position D6	Position D6	Position D6	Position D6	Domain 07	Domain 07	Domain 07	Domain 07	Domain 07	Domain 07	Domain 07	Domain 07
	Patient ID	s vs ns	n vs p	reads (>10 seqs per cluster)	number of cluster with >10 sequences	NTSA	NTSB	DBLa0	DBLa1	DBLa2	DBLpam1	CIDRa1exclvar1	CIDRa2-6	CIDRb	CIDRg	CIDRd	CIDRa1.2-3	DBLb	DBLg	DBLd	DBLe	DBLz	CIDRb	CIDRg	CIDRd	DBLb	DBLg	DBLd	DBLe	DBLz	CIDRb	CIDRg	CIDRd	DBLb	DBLg	DBLd	DBLe	DBLz	CIDRb	CIDRg	CIDRd	DBLb	DBLg	DBLd	DBLe	DBLz	CIDRb	CIDRg	CIDRd
BNI150713_32	#3	ns	n	2485	30	0.0535211	0.696579	0.896579	0.0535211	0	0	0.0346076	0.896579	0	0	0	0.0189135	0.661167	0.0647887	0.180282	0	0	0	0	0	0.0209256	0.477264	0.0285714	0	0.0511066	0.142455	0.0217304	0	0	0.0603622	0.347284	0.129175	0.0812877	0.0136821	0	0	0	0.0189135	0	0.0808853	0	0	0.137223	0
BNI020714_52	#4	ns	p	1297	9	0.266769	0.569005	0.733231	0.266769	0	0	0	0.733231	0	0	0	0.266769	0.311488	0.181187	0.428682	0	0	0	0	0	0	0.288358	0	0	0.140324	0.0239013	0	0	0	0	0	0.407093	0	0	0	0	0	0.266769	0	0	0	0	0	0
BNI080714_34	#5	ns	p	2421	19	0.0227179	0.849649	0.927716	0.0227179	0	0	0	0.927716	0	0	0	0.0227179	0.344899	0	0.425444	0.180091	0	0	0	0	0	0.344899	0	0	0.180091	0.35316	0	0	0	0	0	0.275919	0.291202	0	0	0	0	0.0227179	0	0.256919	0.0731103	0	0	0
BNI280814_48	#6	ns	n	1820	25	0.215385	0.450549	0.462088	0.215385	0.0620879	0	0.0912088	0.462088	0	0	0.0104396	0.0291209	0.247802	0	0.305495	0	0	0	0	0	0	0.11044	0.0406593	0	0	0.17033	0	0	0	0	0	0.0291209	0.0192308	0.0406593	0	0	0	0.0291209	0	0.0192308	0	0	0	0
BNI141014_25	#7	ns	p	3368	17	0.03161	0.637223	0.761004	0.03161	0	0	0	0.761004	0	0	0	0.03161	0.03161	0	0.619202	0.0685377	0	0	0	0	0	0.03161	0	0.0685377	0	0.321713	0.297489	0	0	0	0	0.121123	0	0	0	0	0	0.0525849	0	0	0	0	0	0
BNI090515_12	#9	ns	n	1347	16	0.0222717	0.74536	0.76095	0.0222717	0	0	0	0.76095	0	0	0	0.0222717	0.0393467	0.240535	0.44395	0	0	0	0	0	0	0.0393467	0.240535	0	0	0.385301	0.0586488	0	0	0	0.0081663	0.0764662	0.0445434	0	0.240535	0	0	0.0222717	0	0.285078	0	0	0	0
BNI020615_31	#10	ns	p	1347	20	0	0.835371	1	0	0	0	0	1	0	0	0	0	0.545232	0	0.454768	0	0	0	0	0	0	0.0293399	0.515892	0	0	0.405053	0	0	0	0	0.0293399	0.0456398	0	0.0774246	0	0	0	0.0627547	0	0.0130399	0.0472698	0.0293399	0	0
BNI110615_35	#11	ns	p	2192	16	0.0323905	0.809763	0.967609	0.0323905	0	0	0	0.967609	0	0	0	0.0323905	0.0406022	0	0.900547	0	0	0	0	0	0	0.0323905	0	0	0	0.629106	0	0	0	0	0	0.0323905	0	0	0	0	0	0.0323905	0	0	0	0	0	0
BNI060715_08	#12	ns	p	1414	15	0.0933522	0.781471	0.792786	0.0933522	0	0	0	0.792786	0	0	0	0.0933522	0.157001	0	0.729137	0	0	0	0	0	0	0.157001	0	0	0	0.303395	0.00777935	0	0	0	0.0636492	0.0933522	0	0	0	0	0	0.0933522	0	0	0	0.0636492	0	0
BNI090715_30	#13	s	n	2234	29	0.300806	0.58684	0.2735	0.300806	0.313339	0	0.579678	0.2735	0	0	0.0143241	0.0201432	0.478066	0.0290958	0.210385	0	0	0	0	0	0	0.451209	0.0147717	0	0	0.179051	0.0241719	0	0	0.0886303	0.211728	0.0201432	0.0322292	0.0528201	0	0	0	0.0201432	0.0886303	0.0322292	0	0	0.00760967	0
BNI140715_05	#14	ns	n	1740	35	0.0798851	0.574138	0.664943	0.0798851	0.0281609	0	0.0614943	0.664943	0	0	0	0.0114943	0.108621	0.0350575	0.579885	0	0	0	0	0	0	0.108621	0	0	0	0.236207	0.154598	0	0	0.00862069	0.0247126	0.0206897	0.0281609	0	0	0	0	0.0114943	0.00862069	0.0281609	0	0	0	0
BNI170715_20	#15	s	n	1714	24	0.127188	0.657526	0.618436	0.127188	0.151109	0	0.259043	0.610852	0	0.0192532	0	0	0.344807	0.0291715	0.458576	0	0	0	0	0	0	0.23979	0.0560093	0	0.0134189	0.299883	0.0548425	0	0	0	0.23979	0.0134189	0.0151692	0.0560093	0	0	0.0291715	0	0.0134189	0.0151692	0	0.127771	0	0
BNI180815_21	#16	ns	n	1487	19	0.0558171	0.66039	0.717552	0.0558171	0.0289173	0	0.0383322	0.717552	0.00941493	0	0	0.0369872	0.175521	0.0490921	0.389375	0	0	0	0	0	0.00941493	0.150639	0.0551446	0.00941493	0	0.335575	0	0	0	0.00941493	0.0390047	0.0369872	0.187626	0.0551446	0	0	0	0.0369872	0	0.0840619	0.0154674	0.0289173	0.0100874	0
BNI210815_01	#17	ns	p	2312	11	0.00648789	0.92301	0.92301	0.00648789	0	0.0705017	0	0.92301	0.00648789	0	0	0	0.0705017	0.00648789	0.92301	0	0	0	0	0	0	0	0	0.0769896	0	0.798443	0.124567	0	0	0	0	0.466696	0.00648789	0	0	0	0	0	0	0.00648789	0.466696	0	0	0
BNI250815_22	#18	ns	p	3257	27	0.079214	0.920786	0.90697	0.079214	0	0	0.0525023	0.90697	0.0132023	0	0	0.00951796	0.604851	0.0132023	0.360147	0	0	0	0	0	0.00951796	0.591342	0	0	0	0.320233	0.0254836	0	0.0254836	0.0319312	0.559411	0.00951796	0	0	0.0377648	0	0	0.0350015	0.0224133	0	0	0.550507	0.0089039	0
BNI081015_23	#19	ns	p	857	16	0.217036	0.387398	0.65811	0.217036	0.124854	0	0.299883	0.65811	0	0.042007	0	0	0.312719	0.042007	0.645274	0	0	0	0	0	0	0.312719	0	0	0	0.309218	0	0	0	0	0.193699	0	0.0781797	0	0	0	0	0	0	0.0781797	0	0.193699	0	0
BNI290116_17	#20	s	n	2737	25	0.160395	0.280234	0.567775	0.160395	0.00511509	0	0.154549	0.567775	0	0	0	0.0109609	0.0946292	0.117282	0.428571	0	0	0	0	0	0.0109609	0.0836682	0.117282	0	0	0.0211911	0.119839	0	0	0.016076	0.00511509	0.0109609	0	0	0.117282	0	0	0.0109609	0	0	0	0.00511509	0	0
BNI220616_40	#21	ns	n	1266	27	0.181675	0.723539	0.78436	0.181675	0.0339652	0	0.203791	0.78436	0	0	0	0.0118483	0.324645	0.035545	0.606635	0	0	0	0	0	0	0.294629	0.0489731	0	0	0.323855	0.0110585	0	0	0.105055	0.0616114	0.0118483	0.0868878	0.035545	0.0134281	0	0.035545	0.0118483	0.105055	0.100316	0	0	0.0181675	0
BNI010816_18	#22	ns	n	851	14	0.0211516	0.93302	0.93302	0.0211516	0	0	0.0211516	0.93302	0	0	0	0	0.0364277	0	0.52879	0.190364	0	0	0	0	0	0.0152761	0	0.190364	0	0.450059	0	0	0	0	0.0152761	0.509988	0	0	0	0	0	0	0	0	0	0.0152761	0	0
BNI060816_15	#23	s	n	875	16	0.435429	0.386286	0.457143	0.435429	0.107429	0	0.542857	0.457143	0	0	0	0	0.579429	0	0.420571	0	0	0	0	0	0	0.542857	0.0365714	0	0	0.228571	0.141714	0	0.123429	0.48	0.169143	0	0	0	0.0365714	0	0	0.414857	0	0	0.0468571	0.08	0	0
BNI041216_14	#24	ns	p	988	20	0.216599	0.697368	0.783401	0.216599	0	0	0.152834	0.758097	0	0	0.0890688	0	0.348178	0	0.631579	0	0	0	0	0	0	0.241903	0.0242915	0	0	0.483806	0	0	0.0688259	0	0	0.112348	0	0.0242915	0	0	0	0.112348	0	0	0	0	0	0
BNI111216_28	#25	s	n	2495	28	0.369138	0.540281	0.439279	0.369138	0.176353	0	0.362325	0.324248	0	0.0168337	0.151904	0.0144289	0.785571	0.0557114	0.135471	0	0	0	0	0	0.0144289	0.524248	0.0725451	0	0	0.135471	0	0	0	0.141483	0.202405	0.0388778	0.00681363	0.0653307	0	0	0.0557114	0.0188377	0	0.0312625	0	0.142285	0.00641283	0
BNI150217_38	#26	s	n	1209	26	0.328371	0.53598	0.5244	0.328371	0.101737	0	0.291977	0.5244	0.0909843	0.038048	0	0.00909843	0.404467	0.129032	0.421009	0	0	0	0	0	0	0.354012	0.038048	0.0909843	0	0.142266	0.0330852	0	0	0.139785	0.205128	0.0248139	0.103391	0.0479735	0	0	0.038048	0.019024	0.139785	0.119107	0	0.0645161	0	0
BNI040417_19	#27	ns	p	1008	21	0.0803571	0.813492	0.736111	0.0803571	0.0982143	0	0.0982143	0.736111	0	0	0	0.0803571	0.402778	0	0.511905	0	0	0	0	0	0	0.402778	0	0	0	0.4375	0	0	0	0.0208333	0.322421	0.22619	0	0	0	0	0	0.0803571	0	0.145833	0	0.247024	0	0
BNI290517_41	#28	ns	p	853	17	0	0.764361	0.799531	0	0	0	0	0.799531	0	0	0	0	0.042204	0	0.757327	0	0	0	0	0	0	0.0128957	0.0293083	0	0	0.456038	0	0	0.0269637	0	0.0128957	0	0	0.0293083	0	0	0	0.0269637	0	0	0	0.0128957	0	0
BNI060617_45	#29	ns	p	2254	24	0.0288376	0.895741	0.895741	0.0288376	0	0	0	0.895741	0	0.0288376	0	0	0.0905058	0.0288376	0.679237	0	0	0	0	0	0	0.0905058	0.0288376	0	0	0.0350488	0.530169	0	0	0	0.0652174	0	0	0	0	0.0288376	0	0	0	0	0.0288376	0.0110914	0	0
BNI290817_53	#30	s	n	1988	31	0.212274	0.771127	0.759054	0.212274	0.00905433	0	0.0965795	0.759054	0	0	0	0.124748	0.204728	0.0518109	0.265091	0	0	0	0	0	0	0.186117	0.0417505	0	0.00603622	0.242455	0	0	0	0.0523139	0.00905433	0.130785	0	0.0231388	0	0	0	0.147887	0.0523139	0	0	0	0	0
BNI130917_54	#31	ns	p	2376	33	0.10101	0.754209	0.775253	0.10101	0.00547138	0	0.00547138	0.775253	0	0	0	0.10101	0.123737	0.0223064	0.73569	0	0	0	0	0	0	0.123737	0.0223064	0	0	0.198232	0.0513468	0	0	0	0.00547138	0.10101	0.0172559	0.0934343	0	0	0	0.10101	0	0.0172559	0	0.00547138	0	0
BNI240118_55	#32	ns	p	893	25	0.215006	0.56103	0.557671	0.215006	0.0179171	0	0.147816	0.557671	0	0	0.0257559	0.0414334	0.222844	0.0447928	0.358343	0	0	0	0	0	0.0403135	0.144457	0.0828667	0	0	0.200448	0	0	0	0.0403135	0.0716685	0.160134	0	0.0391937	0.0179171	0	0	0.0806271	0	0	0	0.0716685	0	0
BNI140318_56	#33	ns	p	1617	26	0.038961	0.859617	0.899196	0.038961	0	0	0.0241187	0.899196	0	0	0	0.0148423	0.387137	0.0408163	0.361781	0	0	0	0	0	0	0.16141	0.14162	0	0	0.296846	0	0	0	0.0241187	0.0340136	0.0148423	0.0166976	0.14162	0	0	0	0.0148423	0.0241187	0.0166976	0.0408163	0.0265925	0	0
				1665.5
				3368
[truncated: 178 more columns]

## Sheet: #3
	Total reads	Singletons
	2633	72
						Position D1	Position D1	Position D2	Position D2	Position D2	Position D2	Position D3	Position D3	Position D3	Position D3	Position D3	Position D4	Position D4	Position D4	Position D4	Position D4	Position D4	Position D4	Position D4	Position D5	Position D5	Position D5	Position D5	Position D5	Position D5	Position D5	Position D5	Position D6	Position D6	Position D6	Position D6	Position D6	Position D6	Position D6	Position D6	Domain 07	Domain 07	Domain 07	Domain 07	Domain 07	Domain 07	Domain 07	Domain 07	Domain 08
Patient ID_cluster #	Cluster size	Blast cluster sequence	Best Blast hit	E-value	# hits in varDB	NTSA	NTSB	DBLa0	DBLa1	DBLa2	DBLpam1	CIDRa1	CIDRa2-6	CIDRb	CIDRg	CIDRd	DBLb	DBLg	DBLd	DBLe	DBLz	CIDRb	CIDRg	CIDRd	DBLb	DBLg	DBLd	DBLe	DBLz	CIDRb	CIDRg	CIDRd	DBLb	DBLg	DBLd	DBLe	DBLz	CIDRb	CIDRg	CIDRd	DBLb	DBLg	DBLd	DBLe	DBLz	CIDRb	CIDRg	CIDRd	DBLb
#3_cluster_55	341	GAGACATTATAAGAGGAAAAGATCTTTATGTTGGTAAtagaaaagaaaaagaaaaagagaaattacaaaacaatttaaaaagtattttcaaaaaaaTATATGATGACGTGACGAAGAGGAACAAAGAGTTAAAAACTCGCTACGAAGATGGAAGTGGAAATTTTTTCCAATTACGAGAAGATTGGTGGAACGCTAATAGGCAAGAAGTATGGAAAGCAATGACATGTAGTGCAACAGATGAAGCCCAATATTTTAGAAAAAAAGATTCTGATGGAAAACCTTGCTCTGTTCAAAAGTGCACATGTATTACTGGAGATCCTCCTACGAATCTTGATTACGTGCCTCAATATTTACGT	DBLa0.18	0	32	0	18	20	0	0	0	0	22	0	0	0	21	0	1	0	0	0	0	0	0	19	1	0	0	1	0	0	0	0	17	0	1	1	0	0	0	1	0	1	0	1	14	0	0
#3_cluster_34	329	CAGATATTGTCAGAGGAAAAGATCTATTTCTTGGCACCAATGAAGAGAAAAAACCATTAGAAGAAAATTTACAAAAAATTTTCCAACAAATACATAGTGACGTGACAAGCGGGAAGAATGGGAGGAAGGGGAAGAATGGCGCAGAAGCACGCTACCGAAATGATCCAAATTATTATCAATTACGTGAAGATTGGTGGTATGCTAATCGAGAAACAGTATGGAAAGCCATCACGTGCGAAGCTGGGGGTAATACATATTTTCGACCAACGTGCAGTGATAGTACAAGTCCATCTGAAGCTCATGACAAATGCACGTGTCCCAATGGTGATGTTCCCACATATTTTGACTATGTTCCTCAGTATCTTCGT	DBLa0.6	0	8	0	0	8	0	0	0	0	8	0	0	0	7	0	0	0	0	0	0	0	0	6	1	0	0	0	0	0	0	0	5	0	0	0	1	0	0	1	0	0	0	2	3	0	0
#3_cluster_88	309	AGACATTATACGAGGAAGAGATTTGTATGGTGGTAATaaaaaagaaaaagaaaaaagagaagacttagaaaataagttgaaaaaaaTTTTCAAGAACATTCAGGAGAATAATCCAAGACTTAATGATCTTACAGATGACCAAATTAGGGAATACTGGTGGAACGCTAATAGACAACAAGTATGGACAGCCATCACGTGCAGCGCTGGGAGTGGTACATATTTTCGAGCAACATGTGGTGATGTAAAAAGTCCAACTCCGACTCCTAATAAATGCCGATGTGACGGCGCAAATACCGATCCCCCAACCTATTTCGATTATGTGCCGCAGTATCTTCGC	DBLa0.5	2.16963e-148	1	0	1	1	0	0	0	0	1	0	0	0	1	0	0	0	0	0	0	0	0	0	0	0	0	0	0	0	0	0	0	0	0	0	0	0	0	0	0	0	0	0	0	0	0
#3_cluster_20	147	GAGATATCGTACGTGGCAAAGATTTGTATGGTGGTGGTGGTAGAGGAAAAGGAAAGGAAAAATTAGAAAAGAATTTGAAAACAATTTTCAAGCAAATACATGAAAAATTGACGACGAAGAATGGTGTAAAATCTCGCTACGAAGGTGATGCTCCAACTTATTACAAATTACGAGAAGATTGGTGGACTGCGAATCGTGAAACAGTATGGGAAGCCATGACATGTGACGACAGGCTATGGGGTAATGCATATTTTCGAGCAACGTGCATTGATCTTAATGGAAGTGGAGCCCAAGCTAAGGATAAATGCAGGTGTCCCAAGGCAAATGACGACGTAAATATTGTCCCCACATATTTTGACTATGTGCCGCAGTATCTTCGC	DBLa0.6	0	8	0	0	8	0	0	0	0	8	0	0	0	7	0	0	0	0	0	0	0	0	6	1	0	0	0	0	0	0	0	5	0	0	0	1	0	0	1	0	0	0	2	3	0	0
#3_cluster_108	147	TGACATTATACGAGGAAAAGATCTTTTCCTTGGTCATCAACaaagaaaaaaaagaattagaaaaaaGATTAGTAGAAATGTTTGAGAACATTCAGAGTACTATTGATCAACTTAAGGATCTTCCACTAGATGCGGTAAGAGAATACTGGTGGGCACTTAATAGAGACCAAGTATGGAATGCCATCACATGCAAGGCAGAGCAAGGTGATATATATTCTAAATATCTCGCAGGTCGTATAATAACTGTTTCGAATGAGAAATGTGGTCATATGGATGACGATGTACCAACAAACTTGGATTACGTCCCTCAACATTTACGT	DBLa0.3	0	4	0	4	3	1	0	0	0	4	0	0	0	0	0	4	0	0	0	0	0	0	0	0	0	0	3	1	0	0	0	0	1	0	0	0	0	0	0	0	1	0	0	0	0	0
#3_cluster_62	127	AGACATTATACGAGGAAGAGATTTGTATCGTGGTGTTAATGGAAATGATAAATTAGAAAAGAATTTACAAAAAATTTTCAAGAAAATACATGAAGGATTGACGTCGACGAATGGGAGGAATGGAGAGGCAGCaaaaaaaaTACTACTCTGATCCGAAAGGAAATTTTTTTCAATTAAGAGAAGATTGGTGGAATAATAATAGAATAATGGTATGGAACGCGATAACATGCGGCGTTAAGGGTAATAAATATTTTCGAGGAACATGTGGTTCAGGAGAATGGACTAAAGACAATTGCCGATGTCCTAGTTATAAGGTCCCCACATATTTTGACTACGTGCCGCAGTTTCTTCGC	DBLa0.9	0	5	0	1	3	0	0	0	0	3	0	0	0	0	3	0	0	0	0	0	0	0	0	0	0	3	0	0	0	0	0	0	2	0	0	0	0	0	0	0	0	0	0	0	0	0
#3_cluster_106	109	TGATATTATTAGAGGAAAAGATCTGTATCTTCGAGATAAAGGAAAAAGAGATAAATTAGAAAATAATTTGAAAACAATTTTCAAGAACATTCAGGAGAATAATGAAAAACTTAAATCCCTTACAGATGAACAAATTAGGGAATACTGGTGGGAACTTAATAGAGAAAAAGTATGGTATGCTATCACATGCGGTGCTGGGGGTGGTAAATATTTTAGAAATACATGTGTTTCTGGAAAAGATCGAACTGTGACTCGAGAAAACTGCCGATGTATAGGCGCAACAGTTCCCACATATTTTGATTATGTGCCACAATATTTGAGA	DBLa0.23	2.54142e-167	6	0	6	6	0	0	0	0	6	0	0	0	2	0	4	0	0	0	0	0	0	2	0	0	0	2	1	0	0	0	2	0	0	0	0	0	0	0	0	0	0	2	0	0	0
#3_cluster_8	82	GAGACATTATACGAGGAAAAGATCTGTATCGTGGTAATAATGGAAAGGATAAATTAGAAAATAAGTTGAAAGATATTTTCGGGATAATATATAACAATTTGATGCAGGATTTAAAGAATGACAACATAAGAGGCAAGAACAAAGGTAATGTGACGATGGAGGAAGCAGAAAAACGCTACAAAGATAATGATCCAAATTTTTATAAATTACGAGAAGATTGGTGGTATGCTAATAGAAAAATGGTATGGTACGCGATAACATGCAAGGCGGAAGGTGCATATTTTCATGCAACATGTGGTAGTAGTGCAAAAACTGCAACTCCGACTAGAGACAAATGCCGATGTGCCGCTAATATCGATCCCCCAACCTATTTTGATTATGTGCCGCAGTATCTTCGC	DBLa0.23	5.50627e-125	5	0	1	2	0	0	0	0	2	0	0	0	0	0	2	0	0	0	0	0	0	0	0	0	0	2	0	0	0	0	0	0	0	0	0	0	0	0	0	0	0	0	0	0	0
#3_cluster_109	80	TGACATTATTCGAGGAAAAGATCTTTTCCTTGGTCATAAACAAAGAAAAATAAATTTAGAAAACCGTTTACAAACAATGTTTGAGAACATTCAGAGAAGTAATCCAGAACTAAATAATCTGAAACCTGAACAAGTTAGGGAATATTGGTGGGCACTTAATAGAAAAAAGGTATGGAATGCTATCACATGTAAAGCAAATGATGATGATAAATATTTTAGAGaaaaaaaaCTCCAATGGAAATACGTGCACTGTTAATAAATGTAAATGTGCTAATGGAGATGTTCTCACGAATTTCGACTACGTGCCGCAGTATCTTCGC	DBLa0.15	2.63602e-137	4	0	4	4	0	0	0	0	4	0	0	0	4	0	0	0	0	0	0	0	0	4	0	0	0	0	0	0	0	0	0	0	3	0	0	0	0	0	0	0	0	0	0	0	0
#3_cluster_69	80	GAGATATTATAAGAGGAAAAGATCTGTATCGTGGTAATAATGGGAAGGATAAATTAGAAGAAAATTTGAAAACAATTTTCGAGAAAATACATAGTGGATTGACGAAGAAAGACGCAGAAGCACGCTACAAAAAAGATGAAGATCCAGATTTTTTTAAATTACGAGAAGATTGGTGGAATAATAATAGAAAAATGGTATGGCGCGCGATAACATGCGGCGCTGAGAATGATTCTCAATATTTTCGACAAACATGTGGTACTGGAGAAAAACGAAATGCGACTAAAGGTAAATGCCGATGCGTCACTCATGATGTTCCCACCTATTTCGATTATGTGCCACAATATTTAAGA	DBLa0.4	0	1	0	1	1	0	0	0	0	1	0	0	0	1	0	0	0	0	0	0	0	0	1	0	0	0	0	0	0	0	1	0	0	0	0	0	0	0	0	0	0	0	0	0	0	0
#3_cluster_3	79	AGATATTGTAAGAGGAAGAGATTTATATCTTGGTAATCCAGaagaaataaaacaaagaaaacaattagaaaataagttgaaagaaattttcaagaaaatATATAAAAAGTTGATTGGTGATTTGACGAAGAGCAGAAGCTCGAAGGTGGACAAAGCACAAAATCGCTACAAAGATAAGGACGAAAATTATTTTCAATTACGAGAAGATTGGTGGGACGCGAATCGAGAAACGGTATGGAAGGCTATCACGTGCAAGGCGGACGCAAGTAGTGCATACTTTCGAGCAACGTGCAATGGAAAAGAACAAACTAAAGGTTACTGCCGGTGTAACGGCGACCAGCCAGGTAAGGAAAAGGGCGCAAATGCCGACCAGGTCCCCACATATTTTGACTACGTCCC…	DBLa0.11	0	4	0	2	2	0	1	0	1	2	0	0	0	1	0	2	0	0	0	0	0	0	1	0	0	0	2	0	0	0	0	0	0	1	0	0	0	0	0	0	1	0	0	0	0	0
#3_cluster_68	74	TGATATCGTACGCGGTAAAGATCTGTATCGTCGAGATAAAGGAGaaaaaaaaaaaaaTTAGAAGAACATTTAAAAACAATTTTCGGGAAAATATATAAGGATTTGAAGACGGAGAATGGCGCTTTACAAGCTCGCTACAATGGTGATGATAACAATAATTATTCTAAATTACGAGAAGATTGGTGGGCACTTAATAGAAAAGATGTATGGAAAGCAATTACATGCGAAAATCCGCGTGGTACATATTTTAGAAAGACATGTTCGAAGGGAGAAAGTCACGTTAAAGATAAATGCACATGCGCTAGTGGAGATGTTCCCACCTATTTTGACTACGTGCCACAGTATCTTCGC	DBLa0.12	8.40752e-103	11	0	7	9	0	0	0	0	9	0	0	0	0	0	8	0	0	0	0	0	0	0	0	0	0	5	1	0	0	0	0	0	0	0	0	0	0	0	0	0	0	0	0	0	0
#3_cluster_82	68	GAGATATTATACGAGGAAAAGATCTTTATCTCGGTGATAAAGGagaaaaaacaaaattagaagaaaaattaaaaCAATATTTCAAGCAATTGCATAATATTTTGAAAAAGCCTGCAAAAAACCATTACAATGATCCAAGTGGAAATTTTTTTAAACTAAGAGAACATTGGTGGAATGCTAATAGATACGATGTATGGAAAGCCATTACATGTGGTGCACCAGATAATGCTAAATATAAAGTAATAGGATCAGATGGCCGTGTAACGGAATCGCCATGGACAAAATGTAGAAACTTTGCAGATGTTCCCACTAATTTCGACTATGTCCCTCAATATTTAAGA	DBLa0.18	0	22	0	2	14	0	0	0	0	14	0	0	0	13	0	0	0	0	0	0	0	0	11	0	0	0	0	0	0	0	0	0	0	1	0	0	0	0	0	0	0	0	0	0	0	0
#3_cluster_72	59	TGATATCGTACGCGGTAAAGATCCATTTTATGGTAATCCACAAGaaaaagaaaaaaaGAGATCAATTAGAAAGTAAGTTGAAAGATATTTTCAAGAAAATACATGAAGGGTTGAAAGGTGATGCACAAAATTACTACAAAGATGAAAATGGTGGAAATTTTTTTAAATTACGAGAAGATTGGTGGTATGCGAATCGCGCCACAGTGTGGGAAGCTATCACGTGCGACGCTCAGGGTTTTGACTATTTTCGACAAACAGCGTGTGCAGGAACGCCGACTGATGATAAATGCCGGTGTAAGGGCGACCAGGTCCCCACATATTTTGACTATGTGCCACAGTATCTTCGC	DBLa0.5	2.16963e-148	1	0	1	1	0	0	0	0	1	0	0	0	1	0	0	0	0	0	0	0	0	0	0	0	0	0	0	0	0	0	0	0	0	0	0	0	0	0	0	0	0	0	0	0	0
#3_cluster_50	52	GAGATATTGTAAGAGGAAAGGATCTGTTTCTTGGTAATAATGATAATGataaagtaaaaaaagagaaactacaaaataatttaaaaagtatttttgccaaaaTATATAAGGAATTGAAATTGGAAAAAAACTCTGACTACAAAGATGATGATGGATCTGGAAATTATTATAAATTAAGAGAAGCTTGGTGGACATCGAACAGGGATCAAGTATGGAAAGCCATAACATGCAAAGCACCAGACAAAGCTAATTATTTCATATATAAATCGGACAAATTTCGTAAGTTTTCTAGTGATAGGTGTGGACATAATGAAGGTGATCCTCCTACCAATTTAGATTACGTACCTCAATTTTTAAGA	DBLa1.7	0	169	72	0	0	76	0	0	77	0	0	0	0	74	0	0	0	0	0	0	0	49	19	0	0	0	0	0	0	4	57	5	0	0	0	0	0	0	29	23	0	0	3	1	0	1
#3_cluster_81	47	TGATATTGTAAGAGGAATAGATATGTTTAAACCAAATGTCCATGACAAAGTAGAAAAGGGTCTCCGAGAGGTTTTCAAGAAAATACATGATGGAATGGAAGATGAAGTAAAAAATGATTACAATCCTGATGGATCTGGAAATTATTATAAATTAAGAGAAGCATGGTGGAATGTGAATAGAAATAAAGTATGGGAAGCCATAACCTGTGGGGCACTACCTAAATCTGCATATGTCTTGCAATCAGAAAATAATACACAATTACCTTCATATCTTAAATGCGGCCATAATAATAAGGATGATCCTCCTACCAATTTAGATTATGTTCCTCAATATTTACGTT	DBLa1.1	0	200	155	0	0	158	0	0	156	2	0	0	0	153	0	0	0	1	0	0	0	0	142	0	0	0	0	0	0	0	1	0	129	0	0	0	0	0	116	1	0	0	0	0	0	0
#3_cluster_9	46	GGACATTGTGAGAGGAAGAGATCTGTATCTCGGTTATGATcaaaaagaaaaagaacaaagagaaaaattagacaagaagttgaaagaaaTTTTCAAGCAAATACATGATGACGTGACGACAAATGGGCAGAAGTCGGCGGAAGCAAAAGATCGCTACAATGATGATACAAAAAATTATTTTCAATTACGAGAAGATTGGTGGACAGCGAATCGCGCCACAGTATGGAAAGCAATTACATGTGACGGCAGGCTATCAAATTCTATATATTTTCATGCAACGTGCAATGGAAAAGAACGAACTAAAGGTTACTGCCGGTGTAACGACGACAAGCCACATGACGACAATCCAAATACCGATCCCCCAACCTATTTCGATTATGTGCCGCAGTATCTTCGC	DBLa0.6	0	8	0	0	8	0	0	0	0	8	0	0	0	7	0	0	0	0	0	0	0	0	6	1	0	0	0	0	0	0	0	5	0	0	0	1	0	0	1	0	0	0	2	3	0	0
#3_cluster_73	43	GTGATATTATAAGAGGAAGAGATCTGTATCGTGGTAATAACAAAGAAAAAGAGAAATTAGAGAAGAATTTGAAAAGAATTTTCCAAGAAATATATAACAATTTGAAGAATACTGTTGTACAAGAACACTACAAAGATGATGATAAAGGAACTGAAAATTATTATAAATTAAGGAATGCTTGGTGGGAAGCTAATAGACAAGAAGTATGGAAAGCTATCATATGCGGCGCTGCGGGTGGTAGATATTTTCGACAAACATGTGGTTCAGGAGAATGGACTAATGAAAAATGCCGATGTCCGATAAATGATGTTCCCACATATTTTGACTATGTGCCGCAGTATCTTCGC	DBLa0.11	0	10	0	7	7	0	0	0	0	7	0	0	0	0	0	7	0	0	0	0	0	0	0	0	0	0	2	5	0	0	0	0	0	1	0	0	0	0	0	0	1	0	0	0	0	0
#3_cluster_15	40	TGATATAATACGAGGAAAAGATCTTTTTATAGGTTATAATGAAAAAGATCGAAAAGAAAAAGACCGAAGAGATGAATTAGAAAATAATTTGAAAACAATTTTCGAGAAAATACATGACAAATTGGATGTTAAAATAAAATCAAAGTATGATGATGGATCTGGAAATTATTATCTATTAAGAGAACATTGGTGGAATGCTAATAGACAAGAAATATGGAAAGCCATCACGTGTGAAGTTAAGAGTGGTAATAATTATTTTCGACAAACATGTTGTTCAGGAGAATGGACTGATGACAAATGCCGCTGTAAGAACAAAAAGACCGGCAAAAGTGAGACCGACCAGGTCCCCACATATTTCGATTATGTGCCGCAGTATCTTCGC	DBLa0.16	0	8	0	2	4	0	0	0	0	4	0	0	0	0	0	4	0	0	0	0	0	0	0	0	0	0	2	2	0	0	0	0	0	1	0	0	0	0	0	0	1	0	0	0	0	0
#3_cluster_76	37	GAGATATTGTCAGGGGAAAAGATCTTTTTCTTGGTCATAGCaaagaaaaagaaaaattagaacaaaatttgaaaaatcttttcaagcaattatatgaaaaaTTAAATGATCCACAAAAATCTTCTTATAATGATGATGGAACTAAAAATTATTATAAATTAAGAGAGTATTGGTGGAATGCTAATAGACAACAAGTATGGAAAGCTATCACATGTAAAGCAAAAAATGATGCTGAATATTTTAGAAAAAAAGATTCTGATGGAAAACCTTGCTCTGTTCAAAAGTGCACATGTATTACTGGAGATCCTCCTACGAATCTTGATTACGTCCCTCAATATTTACGT	DBLa0.4	0	17	0	0	10	0	0	0	0	11	0	0	0	10	0	0	1	0	0	0	0	0	2	6	0	0	0	0	0	0	0	0	1	0	2	3	1	0	3	0	0	0	0	0	0	0
#3_cluster_90	34	GTGATATTGTAAGAGGAACAGATATGTTTAAACCTAATGAACAAGACGAAGTATGGAAAGGTCTAAGGGATGTTTTTAAGAAAATATATGAAGACTTGAACAAAAACGGAATTAGAGATTATGATGGTGATCCAAATTATTATAAATTAAGGGAAGCTTGGTGGACAGAGAATCGAAATCAAGTATGGAGAGCATTGACATGTGGTGCTGGAGAGAAGGATACATACTTTACATACTCAAAGGATAATAAACAATTATTTTCAAATTCTAAATGCGGCCATAGTAATGGAGGTGATCCTCTTACCAATTTAGATTACGTACCTCAATTTTTACGT	DBLa1.2	0	42	31	0	1	31	0	0	32	0	0	0	0	4	28	0	0	0	0	0	0	0	2	27	1	0	1	0	0	0	0	1	1	1	24	3	0	11	6	0	11	1	0	1	0	0
#3_cluster_119	30	AGATATTATCAGAGGAAAAGATCTTTTCCTTGGTCATAAACaaaaaaaaaaaTCAATTAGAAGAAAGATTAAAAACAATGTTTGAGAACATTAAGGAAAATAATGGTGAATTaaaaaaaaCTTTTAACTGAACAAATTAGAGAATATTGGTGGGCACTTAATAGAGTACAAGTATGGAATGCTATGATATGTGGTGTAGAACAAAATGCTCAATATTTTAAAGATACATGTTCTACAGGTTGGCATTATGAAAAATGCCATTGTAATGATGGAGATGTTCTAACAAATTTTGACTACGTGCCGCAGTATCTTCGC	DBLa0.4	3.21985e-166	5	0	4	4	0	0	0	0	4	0	0	0	4	0	0	0	0	0	0	0	0	3	1	0	0	0	0	0	0	0	0	1	2	1	0	0	0	1	0	1	0	0	0	0	0
#3_cluster_75	23	GTGATATCGTACGCGGCAAAGATCTTTTCCTTGGTCATAAACAAGGAAAACAAAAACTAGAAGAGAACTTGAGAAACATTTTCAAGAATATACATGATCATTTGACGGATGCAAAAGCAAATTCGTACTACAAAAATGATAATGATCCAAATTATTATCAATTAAGAGAAGATTGGTGGGCACTTAATAGAGTACAAGTATGGAAAGCTATAACGTGCAAAGTGGAAAATGCTCAATATTTTAAAGATACATGTTCTGGTGGGAAATCTCATATAGATAAACATTGCCATTGTATTAATGGCGACGTTCTTACGAATTTCGACTACGTGCCGCAGTATCTTCGC	DBLa0.9	0	17	0	13	8	0	7	0	7	8	0	0	0	7	3	5	0	0	0	0	0	0	9	0	0	1	3	2	0	0	0	2	1	6	0	0	0	0	0	0	6	0	0	0	2	0
#3_cluster_94	22	AGATATCGTACGCGGCAAAGATCTGTATCGTGGTAATGATGaagaaaaaaaccgaagagataaattagaaaagaatttgaaaacaattttcgaaaaaaTTAAGGGAAATAATAATTCAACACTTAATGGTCTTCCACTAGATGAATTAAGAGAATACTGGTGGGCACTTAATAGAAAAGAGGTATGGAAAGCATTAACATGTACTGCACCAAATGATGCTGAGTATTTTCGATTTACATGTTCTGAAGGAGAAAGTATCGCTCATAATAAATGCACATGTATTAATCGAGATCCTCCTACATATTTTGACTACGTGCCGCAGTATCTTCGG	DBLa0.7	6.15627e-109	1	0	0	0	0	0	0	0	0	0	0	0	0	0	0	0	0	0	0	0	0	0	0	0	0	0	0	0	0	0	0	0	0	0	0	0	0	0	0	0	0	0	0	0	0
#3_cluster_35	18	AGATATTATTAGAGGAAAAGATCTGTATCGTCGTGATAGTAGAACAGATAAATTAGAAGATAATTTGAGAAAAATTTTTGGGAATATATATAAAGAATTGACGACGACGGCGACGAGCGGGAATAAAGGGAAGACGAATGGCATAGAAGAACGCTACGGAAGTGATACTACAAATTATTTTCAATTACGAGAAGATTGGTGGAACGCTAATAGACAACAAGTATGGAATGCTATAACATGTGGTGCTCCATCAGATGCTCAATATTTTAGAGAATCATCTTATCATAAAGGTGGCACTTATGAAAAATGCCGATGTGCAATTGGAAATGTTCTTACAAATTGCGACTACGTCCCTCAATATTTAAGA	DBLa0.4	0	1	0	1	1	0	0	0	0	1	0	0	0	1	0	0	0	0	0	0	0	0	1	0	0	0	0	0	0	0	1	0	0	0	0	0	0	0	0	0	0	0	0	0	0	0
#3_cluster_63	15	AGATATTATCAGAGGAAAAGATCTTTTCCTTGGTCATAAACAAAGAAAAAGAAAATTAGAAGAGAATTTACAAAAAATTTTTGGGCATATATATAAAGAATTAACGAAGAATGGGAAGAATGTGGAGCTAAAAACACGCTACGAAAAAGACGGTCAAAATTTTTATCAATTACGAGAAGATTGGTGGAATGCTAATAGGCAAGAAGTATGGAATGCTATCACATGTGGTGTAGAAGAAAACGAGAAATATTTTAAAGACACATGTTCATCCAAAAGTGTGCATTATAGAAAATGCCATTGTATTAATGGCGACGTTCTTACGAATTTCGACTATGTGCCGCAGTATCTTCGC	DBLa0.12	0	2	0	0	2	0	0	0	0	2	0	0	0	0	0	2	0	0	0	0	0	0	0	0	0	0	2	0	0	0	0	0	0	0	0	0	0	0	0	0	0	0	0	0	0	0
#3_cluster_56	13	TGATATTATTCGTGGAAAAGATCTTTATCTTGGTAATAATGGAAAGGATAAATTAGAAAATAAGTTGAAAGATATTTTCGGGATAATATATGAAGAATTGAAAAAGGATCCGACGAAGTCGGCGCTACAAGAACGCTACAAAGGTGATACTGATAATTATTATCAATTACGAGAAGATTGGTGGTATGCTAATAGAAGACAGGTATGGAAAGCTATAAGGTGTGGTGCACCAGATGATGCTAATTATTTTAGACAAACAGTGTGTTCTGAAGGAAAAACTGCGACTAAAGGTAAATGCCGATGTATTTCTGGAGATGTTCCCACATATTTTGATTACGTTCCTCAATATTTGAGA	DBLa0.9	0	2	0	0	1	0	0	0	0	1	0	0	0	0	0	1	0	0	0	0	0	0	0	0	0	0	1	0	0	0	0	0	0	0	0	0	0	0	0	0	0	0	0	0	0	0
#3_cluster_53	12	TGACATAATACGAGGAAAAGATTTATTTATTGGTAATAACAAAAGAGATAAATTAGAAAAACAATTACAAAAATATTTCAAGAAAATATATGACAAATTGGATGGGAAGAAGAAGAAGGAAGCAAAAGACTACTACCAAGATCGAACTGAAAATTATTATCTATTAAGAGAAGATTGGTGGAATAATAATAGAAAAATGGTATGGTACGCGATAACATGCGGCGCTGAGAATGATTCTCAATATTTTCGACGAACATGTGGTAGTGATGAAAAAAGTGCAATTCGGACTCCTAGTCAATGCCGATGTAGCACTCGTGTTGTTCCCACCTATTTCGATTATGTGCCGCAGTTTCTTCGC	DBLa0.10	0	1	0	0	1	0	0	0	0	1	0	0	0	0	0	1	0	0	0	0	0	0	0	0	0	0	1	0	0	0	0	0	0	0	0	0	0	0	0	0	0	0	0	0	0	0
#3_cluster_26	11	AGATATTGTAAGAGGAAGAGATTTGTATCGTCGAGATAAAGGAAAAAGAGATAAATTAGAAGAAAATTTGAAAAAAATTTTCAAGCAAATACATGGTAACGTGACGAGCGGGAAGAAGGAGGAGCTAAAAGCACGCTACGAAGGTGATGAAGACAAAATTTTGTTAAAATTACGAGAAGATTGGTGGGCACTTAATAGACAAGATGTATGGAAAGCTATCACATGCAACGCTGGGGCTTCTCAATATTTTCGAGCAACATGTGGTAGTGGTGAAAAAAATTCAACTCTGACTCCTAATAAATGCCGATGTGACGACAATCCAAATACCGATCCCCCAACCTATTTCGATTATGTGCCGCAGTTTCTTCGC	DBLa0.16	1.80832e-139	2	0	1	1	0	0	0	0	1	0	0	0	0	0	1	0	0	0	0	0	0	0	0	0	0	1	0	0	0	0	0	0	0	0	0	0	0	0	0	0	0	0	0	0	0
#3_cluster_16	11	CGATATTATAAGAGGAAAAGATCTGTATCGTGGTGATAAGAAAAAAGATCAACAAGAAAAAGTTAGATTAGAAGAGAATTTGAAAAAAATTTTCAAGAATATATATGACAATTTGGTTAGAGAGAAACCGCAAGCAGAAGCACGCTACCAAGATAAAAATGGTGGAAATTTTTTTAAATTACGAGAAGATTGGTGGACTGCGAATAGGCACACCGTGTGGGAAGCTATCACGTGCGACGTTAAGAGTGGTTCTCAATATTTTCGACAAACATGTGGTGGTGATAAAGAAAACACTGCAACTCGGGCTAGTCACCAATGCCGATGTGACGGCGCAAATGTCGATCCCCCAACCTATTTTGACTATGTGCCACAGTTTCTTCGC	DBLa0.11	0	10	0	7	7	0	0	0	0	7	0	0	0	0	0	7	0	0	0	0	0	0	0	0	0	0	2	5	0	0	0	0	0	1	0	0	0	0	0	0	1	0	0	0	0	0
	2485
					# hits in varDB	NTSA	NTSB	DBLa0	DBLa1	DBLa2	DBLpam1	CIDRa1	CIDRa2-6	CIDRb	CIDRg	CIDRd	DBLb	DBLg	DBLd	DBLe	DBLz	CIDRb	CIDRg	CIDRd	DBLb	DBLg	DBLd	DBLe	DBLz	CIDRb	CIDRg	CIDRd	DBLb	DBLg	DBLd	DBLe	DBLz	CIDRb	CIDRg	CIDRd	DBLb	DBLg	DBLd	DBLe	DBLz	CIDRb	CIDRg	CIDRd	DBLb
				Sample_total:	607	258	83	137	266	8	0	273	142	0	0	0	318	34	49	1	1	0	0	0	49	234	38	1	4	30	17	0	4	60	42	136	18	28	9	1	11	159	24	24	1	12	25	2	1
Interpreted Results				Position D1	Position D1	Position D2	Position D2	Position D2	Position D2	Position D3	Position D3	Position D3	Position D3	Position D3	Position D3	Position D4	Position D4	Position D4	Position D4	Position D4	Position D4	Position D4	Position D4	Position D5	Position D5	Position D5	Position D5	Position D5	Position D5	Position D5	Position D5	Position D6	Position D6	Position D6	Position D6	Position D6	Position D6	Position D6	Position D6	Domain 07	Domain 07	Domain 07	Domain 07	Domain 07	Domain 07	Domain 07	Domain 07	Domain 08	Domain 08
Patient ID_cluster #	Cluster size			NTSA	NTSB	DBLa0	DBLa1	DBLa2	DBLpam1	CIDRa1	CIDRa2-6	CIDRb	CIDRg	CIDRd	CIDRa1.2-3	DBLb	DBLg	DBLd	DBLe	DBLz	CIDRb	CIDRg	CIDRd	DBLb	DBLg	DBLd	DBLe	DBLz	CIDRb	CIDRg	CIDRd	DBLb	DBLg	DBLd	DBLe	DBLz	CIDRb	CIDRg	CIDRd	DBLb	DBLg	DBLd	DBLe	DBLz	CIDRb	CIDRg	CIDRd	DBLb	DBLg
#3_cluster_55	341			0	1	1	0	0	0	0	1	0	0	0		1	0	0	0	0	0	0	0	0	1	0	0	0	0	0	0	0	0	1	0	0	0	0	0	0	0	0	0	0	0	1	0	0	0
#3_cluster_34	329			0	0	1	0	0	0	0	1	0	0	0		1	0	0	0	0	0	0	0	0	1	0	0	0	0	0	0	0	0	1	0	0	0	0	0	0	0	0	0	0	0	0	0	0	0
#3_cluster_88	309			0	1	1	0	0	0	0	1	0	0	0		1	0	0	0	0	0	0	0	0	0	0	0	0	0	0	0	0	0	0	0	0	0	0	0	0	0	0	0	0	0	0	0	0	0
#3_cluster_20	147			0	0	1	0	0	0	0	1	0	0	0		1	0	0	0	0	0	0	0	0	1	0	0	0	0	0	0	0	0	1	0	0	0	0	0	0	0	0	0	0	0	0	0	0	0
#3_cluster_108	147			0	1	1	0	0	0	0	1	0	0	0		0	0	1	0	0	0	0	0	0	0	0	0	0	1	0	0	0	0	0	1	0	0	0	0	0	0	0	1	0	0	0	0	0	0
#3_cluster_62	127			0	1	1	0	0	0	0	1	0	0	0		0	1	0	0	0	0	0	0	0	0	0	0	1	0	0	0	0	0	0	1	0	0	0	0	0	0	0	0	0	0	0	0	0	0
#3_cluster_106	109			0	1	1	0	0	0	0	1	0	0	0		0	0	0	0	0	0	0	0	0	0	0	0	0	0	0	0	0	0	0	0	0	0	0	0	0	0	0	0	0	0	0	0	0	0
#3_cluster_8	82			0	1	1	0	0	0	0	1	0	0	0		0	0	1	0	0	0	0	0	0	0	0	0	0	1	0	0	0	0	0	0	0	0	0	0	0	0	0	0	0	0	0	0	0	0
#3_cluster_109	80			0	1	1	0	0	0	0	1	0	0	0		1	0	0	0	0	0	0	0	0	1	0	0	0	0	0	0	0	0	0	0	1	0	0	0	0	0	0	0	0	0	0	0	0	0
#3_cluster_69	80			0	1	1	0	0	0	0	1	0	0	0		1	0	0	0	0	0	0	0	0	1	0	0	0	0	0	0	0	1	0	0	0	0	0	0	0	0	0	0	0	0	0	0	0	0
#3_cluster_3	79			0	1	0	0	0	0	0	0	0	0	0		0	0	0	0	0	0	0	0	0	0	0	0	0	0	0	0	0	0	0	0	0	0	0	0	0	0	0	0	0	0	0	0	0	0
#3_cluster_68	74			0	1	1	0	0	0	0	1	0	0	0		0	0	1	0	0	0	0	0	0	0	0	0	0	1	0	0	0	0	0	0	0	0	0	0	0	0	0	0	0	0	0	0	0	0
#3_cluster_82	68			0	1	1	0	0	0	0	1	0	0	0		1	0	0	0	0	0	0	0	0	1	0	0	0	0	0	0	0	0	0	0	1	0	0	0	0	0	0	0	0	0	0	0	0	0
#3_cluster_72	59			0	1	1	0	0	0	0	1	0	0	0		1	0	0	0	0	0	0	0	0	0	0	0	0	0	0	0	0	0	0	0	0	0	0	0	0	0	0	0	0	0	0	0	0	0
#3_cluster_50	52			1	0	0	1	0	0	1		0	0	0		1	0	0	0	0	0	0	0	1	0	0	0	0	0	0	0	0	1	0	0	0	0	0	0	0	0	0	0	0	0	0	0	0	0
#3_cluster_81	47			1	0	0	1	0	0	0		0	0	0	1	1	0	0	0	0	0	0	0	0	1	0	0	0	0	0	0	0	0	0	1	0	0	0	0	0	1	0	0	0	0	0	0	0	0
#3_cluster_9	46			0	0	1	0	0	0	0	1	0	0	0		1	0	0	0	0	0	0	0	0	1	0	0	0	0	0	0	0	0	1	0	0	0	0	0	0	0	0	0	0	0	0	0	0	0
#3_cluster_73	43			0	1	1	0	0	0	0	1	0	0	0		0	0	1	0	0	0	0	0	0	0	0	0	0	0	1	0	0	0	0	0	1	0	0	0	0	0	0	1	0	0	0	0	0	0
#3_cluster_15	40			0	1	1	0	0	0	0	1	0	0	0		0	0	1	0	0	0	0	0	0	0	0	0	0	0	0	0	0	0	0	0	0	0	0	0	0	0	0	0	0	0	0	0	0	0
#3_cluster_76	37			0	0	1	0	0	0	0	1	0	0	0		1	0	0	0	0	0	0	0	0	0	1	0	0	0	0	0	0	0	0	0	0	0	0	0	0	0	0	0	0	0	0	0	0	0
#3_cluster_90	34			1	0	0	1	0	0	1		0	0	0		0	1	0	0	0	0	0	0	0	0	1	0	0	0	0	0	0	0	0	0	0	1	0	0	0	0	0	0	0	0	0	0	0	0
#3_cluster_119	30			0	1	1	0	0	0	0	1	0	0	0		1	0	0	0	0	0	0	0	0	1	0	0	0	0	0	0	0	0	0	0	0	0	0	0	0	0	0	0	0	0	0	0	0	0
#3_cluster_75	23			0	1	0	0	0	0	0	0	0	0	0		0	0	0	0	0	0	0	0	0	0	0	0	0	0	0	0	0	0	0	0	0	0	0	0	0	0	0	0	0	0	0	0	0	0
#3_cluster_94	22
#3_cluster_35	18			0	1	1	0	0	0	0	1	0	0	0		1	0	0	0	0	0	0	0	0	1	0	0	0	0	0	0	0	1	0	0	0	0	0	0	0	0	0	0	0	0	0	0	0	0
#3_cluster_63	15			0	0	1	0	0	0	0	1	0	0	0		0	0	1	0	0	0	0	0	0	0	0	0	0	1	0	0	0	0	0	0	0	0	0	0
#3_cluster_56	13			0	0	1	0	0	0	0	1	0	0	0		0	0	1	0	0	0	0	0	0	0	0	0	0	1	0	0	0	0	0	0	0	0	0	0
#3_cluster_53	12			0	0	1	0	0	0	0	1	0	0	0		0	0	1	0	0	0	0	0	0	0	0	0	0	1	0	0	0	0	0	0	0	0	0	0
#3_cluster_26	11			0	1	1	0	0	0	0	1	0	0	0		0	0	1	0	0	0	0	0	0	0	0	0	0	1	0	0	0	0	0	0	0	0	0	0	0	0	0	0	0	0	0	0	0	0
#3_cluster_16	11			0	1	1	0	0	0	0	1	0	0	0		0	0	1	0	0	0	0	0	0	0	0	0	0	0	1	0	0	0	0	0	1	0	0	0	0	0	0	1	0	0	0	0	0	0
			Hit Rate:	0.0535211	0.696579	0.896579	0.0535211	0	0	0.0346076	0.896579	0	0	0	0.0189135	0.661167	0.0647887	0.180282	0	0	0	0	0	0.0209256	0.477264	0.0285714	0	0.0511066	0.142455	0.0217304	0	0	0.0603622	0.347284	0.129175	0.0812877	0.0136821	0	0	0	0.0189135	0	0.0808853	0	0	0.137223	0	0	0
Suggested Composition
Patient ID_cluster #
#3_cluster_55	NTSB7	DBLa0.18	CIDRa5	DBLb5	DBLg12	DBLd1	CIDRg6	DBLe2	DBLz3	DBLe2
#3_cluster_34		DBLa0.6	CIDRa3.4	DBLb5	DBLg	DBLd
#3_cluster_88	NTSB3	DBLa0.5	CIDRa2.9	DBLb13
#3_cluster_20		DBLa0.6	CIDRa3.4	DBLb5	DBLg	DBLd
#3_cluster_108	NTSB5	DBLa0	CIDRa3.4	DBLd1	CIDRb	DBLe2	DBLe2
#3_cluster_62	NTSB7	DBLa0.9	CIDRa2.7	DBLg	DBLz	DBLe4
#3_cluster_106	NTSB3	DBLa0	CIDRa2.1
#3_cluster_8	NTSB3	DBLa0.9	CIDRa2.7	DBLd1	CIDRb
#3_cluster_109	NTSB3	DBLa0.3	CIDRa5	DBLb5	DBLg3	DBLz4
#3_cluster_69	NTSB3	DBLa0.4	CIDRa3.4	DBLb5	DBLg16	DBLg16
#3_cluster_3	NTSB3
#3_cluster_68	NTSB3	DBLa0	CIDRa3.1	DBLd1	CIDRb1
#3_cluster_82	NTSB3	DBLa0	CIDRa4	DBLb5	DBLg	DBLz4
#3_cluster_72	NTSB3	DBLa0.5	CIDRa2.9	DBLb13
#3_cluster_50	NTSA6	DBLa1.7	CIDRa1.4	DBLb1	DBLb1	DBLg
#3_cluster_81	NTSA1	DBLa1.1	CIDRa1.2	DBLb11	DBLg1	DBLe1	DBLg1	DBLz	DBLe1
#3_cluster_9		DBLa0.6	CIDRa3.4	DBLb5	DBLg	DBLd
#3_cluster_73	NTSB3	DBLa0.11	CIDRa2.2	DBLd1	CIDRg4	DBLz6	DBLe6
#3_cluster_15	NTSB3	DBLa0.16	CIDRa3.4	DBLd1
#3_cluster_76		DBLa0.4	CIDRa6	DBLb5	DBLd
#3_cluster_90	NTSA2	DBLa1.2	CIDRa1	DBLg	DBLd5	CIDRb
#3_cluster_119	NTSB3	DBLa0.4	CIDRa6	DBLb4	DBLg
#3_cluster_75	NTSB3
#3_cluster_94
#3_cluster_35	NTSB3	DBLa0.4	CIDRa3.4	DBLb5	DBLg16	DBLg16
#3_cluster_63		DBLa0.12	CIDRa2.4	DBLd1	CIDRb
#3_cluster_56		DBLa0.9	CIDRa2.4	DBLd1	CIDRb5
#3_cluster_53		DBLa0.10	CIDRa2.2	DBLd1	CIDRb1
#3_cluster_26	NTSB3	DBLa0.17	CIDRa3.1	DBLd1	CIDRb5
#3_cluster_16	NTSB3	DBLa0.11	CIDRa2.2	DBLd1	CIDRg4	DBLz6	DBLe6
[truncated: 177 more columns]

## Sheet: #4
	Total reads	Singletons
	3710	122
						Position D1	Position D1	Position D2	Position D2	Position D2	Position D2	Position D3	Position D3	Position D3	Position D3	Position D3	Position D4	Position D4	Position D4	Position D4	Position D4	Position D4	Position D4	Position D4	Position D5	Position D5	Position D5	Position D5	Position D5	Position D5	Position D5	Position D5	Position D6	Position D6	Position D6	Position D6	Position D6	Position D6	Position D6	Position D6	Domain 07	Domain 07	Domain 07	Domain 07	Domain 07	Domain 07	Domain 07	Domain 07	Domain 08
Patient ID_cluster #	Cluster size	Blast cluster sequence	Best Blast hit	E-value	# hits in varDB	NTSA	NTSB	DBLa0	DBLa1	DBLa2	DBLpam1	CIDRa1	CIDRa2-6	CIDRb	CIDRg	CIDRd	DBLb	DBLg	DBLd	DBLe	DBLz	CIDRb	CIDRg	CIDRd	DBLb	DBLg	DBLd	DBLe	DBLz	CIDRb	CIDRg	CIDRd	DBLb	DBLg	DBLd	DBLe	DBLz	CIDRb	CIDRg	CIDRd	DBLb	DBLg	DBLd	DBLe	DBLz	CIDRb	CIDRg	CIDRd	DBLb
#4_cluster_61	511	GTGATATCGTACGCGGTAAAGATCTTTATATTCGTAAtaaagggaaaaaagaaaaattagaagaaaaattaaaaCAATATTTCAACAATATATATGAAAATTTGGTTAGAGAGAAATCACAAGCAAAAGACTACTACCAAGATGAAATTGGTGGAAATTTTTTTAAATTACGAGAAGATTGGTGGTATGCAAATCGGCACACCGTGTGGAAAGCCATCACATGTAACGCTTGGGGTGATACATATTTTCATGCAACGTGCAGTGAACGTAATGGAGGTTGTTGTCAAGCTAATGACAAATGCCGCTGTAAGGACGAAAAGGGCAAAAATACCGACCAAGTCCCCACATATTTCGATTATGTGCCACAGTTTCTTCGC	DBLa1.4	0	200	175	0	0	179	0	0	179	0	0	0	0	174	0	0	0	0	0	0	0	0	162	0	0	0	0	0	0	0	0	0	153	0	0	0	0	0	131	0	0	0	0	0	0	0
#4_cluster_203	346	GTGATATTGTAAGAGGAAAAGATCTTTTCCTTGGTGCTCCTaataaagagaaaataaaattagaagaaaatctgaaaaaaaTATTTGATAACATTAAGAATGAAAATGCAGAACTTAGTAAATTATCACTTGAAAAAGTTAGGGAATATTGGTGGGCAATTCATAGAAAAGAGCTATGGGAAGCATTAACATGCAATGCACCAAAAGGTGCTAATTATTTTGTATATAAATTAGATGGACCTAAATTTTCTAGTGATAGGTGTGGACATAATTATAACGGTGATCCTCTTACGAATTTAGATTATGTTCCTCAATATTTACGT	DBLa1.4	0	200	170	0	0	173	0	0	174	0	0	0	0	170	0	0	0	0	0	0	0	0	157	0	0	0	0	0	0	0	1	0	148	0	0	0	0	0	132	0	0	1	0	0	0	0
#4_cluster_78	182	AGATATTGTAAGAGGAAAAGATCTGTATCGTGGTAATAATGGAAAGGATAAATTAGAAGATAATTTaaaaaaaaaTTTTTGGGAATATATATAAAGGATTGACGACGGCGAATGGGAAGAAAGGGCAGAAGTCGGCAAAAGACCACTACAAAGATGATGAGGATGGAAATTTTTTTCAATTACGAGAAGATTGGTGGAATAATAATAGAAAAATGGTATGGCGCGCGATAACATGCGGCGCTGAGAATGATTCTCAATATTTTCGACAAACATGTGGTTCAGGAGAGAAGGGAAGTGCGACTAAAGGTAAATGCCGATGTCCTAGTTATAAGGTCCCCACATATTTCGATTATGTGCCACAATATTTAAGA	DBLa0.9	0	1	0	0	1	0	0	0	0	1	0	0	0	0	1	0	0	0	0	0	0	0	0	0	0	1	0	0	0	0	0	0	1	0	0	0	0	0	0	0	0	0	0	0	0	0
#4_cluster_171	102	AGACATTATACGAGGAAAAGATCTTTATCGTGGTAATAATGgaaaggataaattagaaaataatttgaaaaaaattttcaagaaaatacaagaaaaaTTGATAGGTGATGCAAAAAATCACTACGAAGATGGATCTGGAAACTTTTTTAAATTACGAGAAGATTGGTGGTATGCTAATAGAAGACAGGTATGGAAAGCTATAAGGTGTGGTGCACCAGATGATGCTAATTATTTTAGACAAACAGTGTGTTCTGAAGGAAAAACTGCGACTAAAGGTAAATGCCGATGTATTTCTGGAGATGTTCCCACATATTTTGATTACGTTCCTCAATATTTGAGA	DBLa0.9	0	8	0	1	6	0	0	0	0	6	0	0	0	1	1	4	0	0	0	0	0	0	0	0	0	1	4	0	0	0	0	0	1	0	0	0	0	0	0	0	0	0	0	0	0	0
#4_cluster_2	53	TGATATCGTTAGAGGAAGAGATCTTTTCCTCGGTAATGATGAAGaaaaaaaacaaagaaaaCAATTAGATGATAAGTTGAAAGAAATTTTCAAGAAAATATATAATGACGTGACGTCGACGAATGGGAAGACGAATGGCGCAGAAGCACGCTACAATGATCCTAAAGAAAATTTTTATCAATTAAGGGAAGATTGGTGGACGGCGAATCGAGAAACAGTATGGAAAGCACTAACATGTGAAGTTGGTAGTGGTACATATTTTCGGCCAACGTGCAAAAGTAGTGGTGGTGGTATTAGTGAAACTCGAGAGCAAGCCAGAGACAAATGCCGGTGTGAGAACAAAACTGGCGCAAGTGGCAACGGCGACGTAAATATTGTCCCCACATATTTCGATTATGT…	DBLa0.5	0	68	0	57	56	0	0	0	0	58	0	0	0	1	50	0	0	0	0	0	0	0	1	17	0	26	0	0	0	0	0	1	0	0	15	2	0	0	0	0	0	1	1	0	0	0
#4_cluster_98	31	AGACATTGTACGAGGAAAAGATCTTTTCCTCGGTAATGATaaagaaaaagaaaaaagaaaacaattagaaaaggaattgaaagATATTTTCAAGAATATATATGACAAATTGAAGAATGGGAAGACGAATGGCGCAGAAGCACGCTACAAAGATACTGATAATTATTATGAATTAAGAGAAGATTGGTGGACAGAGAATCGAGAAACAGTATGGAAAGCATTAACATGCAAGGCTGACGATAGTAATAGATATTTTCGACCAACATGTGCTGGAGGAACAACTTCAACTCAAGGTAAATGCCGATGTAACGACAAGGCAAATGTCGATCCCCCAACCTATTTCGATTATGTGCCGCAGTATCTTCGC	DBLa0.16	0	2	0	0	1	0	0	0	0	1	0	0	0	0	0	1	0	0	0	0	0	0	0	0	0	0	1	0	0	0	0	0	0	0	0	0	0	0	0	0	0	0	0	0	0	0
#4_cluster_154	30	TGATATTATTCGAGGAAAAGATCTATTTCTTGGTAATAATAaagaaaaaaaagcaattagaagagaatttaaaaaaaattttcaaagaaaTATATGACAATTTGAAGAATACTGATGTACAAGAACACTACAAAGATGATGATAAAGTAACTAAAAATTATTATAAATTAAGGAATGATTGGTGGGAAGCTAATAGACAAGAAGTATGGAAAGCTATCACATGTGGCGCTGCGGGTGGTACATATTTTAGAAATACATGTGTTGGGGGAAATGAAACTGAAAGTAACTGCCGATGTAAGACAAATTATGTTCCTACATATTTTGACTACGTGCCGCAGTATCTTCGC	DBLa0.8	0	5	0	2	4	0	0	0	0	4	0	0	0	3	0	1	0	0	0	0	0	0	0	2	0	0	0	1	0	0	0	0	0	0	2	0	0	0	0	0	0	0	0	0	0	0
#4_cluster_136	28	TGACATTATACGAGGAAAAGATCTTTTTATAGGTTATGATGAAAGAGATCGAAATGAAAAAGCTAAATTACAAGAGAACTTGACAAAAATTTTCGCGAAAATATATAATAATTTGCAGGATACTGAAGCACAAAATCGCTACAAAGATACTGATAATTATTATGAATTGAGAGAAGATTGGTGGAACGCTAATAGAAAAGAAGTATGGAAAGCCATCACATGTGGTGCTGGAGAGGGTGATAGATATTCAAAAACAATCACATACGGTACTACTACTACTTCATATCCTAGATGCGGTCATGAGGATGATAACGTCCCAACAAATTTAGATTACGTCCCTCAATATTTAAGA	DBLa0.21	0	26	0	14	18	0	1	0	1	19	0	0	0	19	0	0	0	1	0	0	0	0	16	0	0	0	0	0	0	0	0	2	4	7	0	0	0	0	0	0	10	0	2	0	0	0
#4_cluster_120	14	AGACATTATAAGAGGAAAAGATCTGTATCTCGGTAATGATaaagaaaaagaaaaaagaaaacaattagaaaaggaattgaaagATATTTTCAAGAATATATATGACAAATTGAAGAATGGGAAGACGAATGGCGCAGAAGCACGCTACAAAGATACTGATAATTATTATGAATTAAGAGAAGATTGGTGGACAGAGAATCGAGAAACAGTATGGAAAGCATTAACATGCAAGGCTGACGATAGTAATAGATATTTTCGACCAACATGTGGTGGAGGAACAACTTCAACTCAAGGTAAATGCCGATGTAACGACAACCAGGTCCCCACATATTTTGACTATGTGCCGCAGTATCTTCGC	DBLa0.18	0	18	0	9	12	0	0	0	0	12	0	0	0	3	0	9	0	0	0	0	0	0	0	2	0	0	6	2	0	0	0	0	0	0	2	0	0	0	0	0	0	0	0	0	0	0
					# hits in varDB	NTSA	NTSB	DBLa0	DBLa1	DBLa2	DBLpam1	CIDRa1	CIDRa2-6	CIDRb	CIDRg	CIDRd	DBLb	DBLg	DBLd	DBLe	DBLz	CIDRb	CIDRg	CIDRd	DBLb	DBLg	DBLd	DBLe	DBLz	CIDRb	CIDRg	CIDRd	DBLb	DBLg	DBLd	DBLe	DBLz	CIDRb	CIDRg	CIDRd	DBLb	DBLg	DBLd	DBLe	DBLz	CIDRb	CIDRg	CIDRd	DBLb
				Sample_total:	528	345	83	98	352	1	0	354	101	0	0	0	371	52	15	0	1	0	0	0	0	336	21	0	28	11	3	0	0	1	3	307	7	19	2	0	0	263	0	10	2	3	0	0	0
Interpreted Results				Position D1	Position D1	Position D2	Position D2	Position D2	Position D2	Position D3	Position D3	Position D3	Position D3	Position D3	Position D3	Position D4	Position D4	Position D4	Position D4	Position D4	Position D4	Position D4	Position D4	Position D5	Position D5	Position D5	Position D5	Position D5	Position D5	Position D5	Position D5	Position D6	Position D6	Position D6	Position D6	Position D6	Position D6	Position D6	Position D6	Domain 07	Domain 07	Domain 07	Domain 07	Domain 07	Domain 07	Domain 07	Domain 07	Domain 08	Domain 08
Patient ID_cluster #	Cluster size			NTSA	NTSB	DBLa0	DBLa1	DBLa2	DBLpam1	CIDRa1	CIDRa2-6	CIDRb	CIDRg	CIDRd	CIDRa1.2-3	DBLb	DBLg	DBLd	DBLe	DBLz	CIDRb	CIDRg	CIDRd	DBLb	DBLg	DBLd	DBLe	DBLz	CIDRb	CIDRg	CIDRd	DBLb	DBLg	DBLd	DBLe	DBLz	CIDRb	CIDRg	CIDRd	DBLb	DBLg	DBLd	DBLe	DBLz	CIDRb	CIDRg	CIDRd	DBLb	DBLg
#4_cluster_61	511			1	0	0	1	0	0	0		0	0	0	1	1	0	0	0	0	0	0	0	0	1	0	0	0	0	0	0	0	0	0	1	0	0	0	0	0	1	0	0	0	0	0	0	0	0
#4_cluster_203	346			1	0	0	1	0	0	0		0	0	0	1	1	0	0	0	0	0	0	0	0	1	0	0	0	0	0	0	0	0	0	1	0	0	0	0	0	1	0	0	0	0	0	0	0	0
#4_cluster_78	182			0	0	1	0	0	0	0	1	0	0	0		0	1	0	0	0	0	0	0	0	0	0	0	1	0	0	0	0	0	0	1	0	0	0	0	0	0	0	0	0	0	0	0
#4_cluster_171	102			0	1	1	0	0	0	0	1	0	0	0		0	0	0	0	0	0	0	0	0	0	0	0	0	0	0	0	0	0	0	0	0	0	0	0	0	0	0	0	0	0	0	0	0	0
#4_cluster_2	53			0	1	1	0	0	0	0	1	0	0	0		0	1	0	0	0	0	0	0	0	0	0	0	0	0	0	0	0	0	0	0	0	0	0	0	0	0	0	0	0	0	0	0	0	0
#4_cluster_98	31			0	0	1	0	0	0	0	1	0	0	0		0	0	1	0	0	0	0	0	0	0	0	0	0	1	0	0	0	0	0	0	0	0	0	0
#4_cluster_154	30			0	1	1	0	0	0	0	1	0	0	0		1	0	0	0	0	0	0	0	0	0	0	0	0	0	0	0	0	0	0	0	0	0	0	0	0	0	0	0	0	0	0	0	0	0
#4_cluster_136	28			0	1	1	0	0	0	0	1	0	0	0		1	0	0	0	0	0	0	0	0	1	0	0	0	0	0	0	0	0	0	0	0	0	0	0	0	0	0	0	0	0	0	0	0	0
#4_cluster_120	14			0	1	1	0	0	0	0	1	0	0	0		0	0	1	0	0	0	0	0	0	0	0	0	0	0	0	0	0	0	0	0	0	0	0	0	0	0	0	0	0	0	0	0	0	0
			Hit Rate:	0.660756	0.175019	0.339244	0.660756	0	0	0	0.339244	0	0	0	0.660756	0.705474	0.181187	0.0346955	0	0	0	0	0	0	0.682344	0	0	0.140324	0.0239013	0	0	0	0	0	0.801079	0	0	0	0	0	0.660756	0	0	0	0	0	0	0	0
Suggested Composition
Patient ID_cluster #
#4_cluster_61	NTSA1	DBLa1.4	CIDRa1.3	DBLb1	DBLg15	DBLe1	DBLg15	DBLz1	DBLe1
#4_cluster_203	NTSA1	DBLa1.4	CIDRa1.3	DBLb1	DBLg15	DBLe1	DBLg15	DBLz	DBLe1
#4_cluster_78		DBLa0.9	CIDRa2.7	DBLg14	DBLz5	DBLe4
#4_cluster_171	NTSB3	DBLa0.9	CIDRa2.1
#4_cluster_2	NTSB3	DBLa0.5	CIDRa2.6	DBLg
#4_cluster_98		DBLa0.16	CIDRa3.4	DBLd1	CIDRb1
#4_cluster_154	NTSB4	DBLa0.8	CIDRa5	DBLb5
#4_cluster_136	NTSB	DBLa0	CIDRa2.1	DBLb5	DBLg
#4_cluster_120	NTSB	DBLa0.18	CIDRa4	DBLd1
[truncated: 177 more columns]

## Sheet: #5
	Total reads	Singletons
	2585	82
						Position D1	Position D1	Position D2	Position D2	Position D2	Position D2	Position D3	Position D3	Position D3	Position D3	Position D3	Position D4	Position D4	Position D4	Position D4	Position D4	Position D4	Position D4	Position D4	Position D5	Position D5	Position D5	Position D5	Position D5	Position D5	Position D5	Position D5	Position D6	Position D6	Position D6	Position D6	Position D6	Position D6	Position D6	Position D6	Domain 07	Domain 07	Domain 07	Domain 07	Domain 07	Domain 07	Domain 07	Domain 07	Domain 08
Patient ID_cluster #	Cluster size	Blast cluster sequence	Best Blast hit	E-value	# hits in varDB	NTSA	NTSB	DBLa0	DBLa1	DBLa2	DBLpam1	CIDRa1	CIDRa2-6	CIDRb	CIDRg	CIDRd	DBLb	DBLg	DBLd	DBLe	DBLz	CIDRb	CIDRg	CIDRd	DBLb	DBLg	DBLd	DBLe	DBLz	CIDRb	CIDRg	CIDRd	DBLb	DBLg	DBLd	DBLe	DBLz	CIDRb	CIDRg	CIDRd	DBLb	DBLg	DBLd	DBLe	DBLz	CIDRb	CIDRg	CIDRd	DBLb
#5_cluster_30	407	GAGATATTGTCAGAGGAAAAGATCTGTATCTCGGTTATGATGATAAAGAAAAAGATCAAAGAGAACAATTAGAAAATAATTTAAGAAAAATTTTCGGGAAAATATATAATGAGGTGACGAATGGGAGGAATGTGCAGAAGTCGGCGGAAGCAAAAGAACGGTACAAAGATACTGCAAATTATTATGAATTAAGGGAAGATTGGTGGGAACTTAATAGACAAGATGTATGGAAAGCTATTACATGCAAGGCAACTGATGATGATAAATATTTTAGAAAAACAGCGTGTGGTACAGGAACGGCGACTTATGACAAATGCCGCTGTAAGGACAAACACGGCAAAATTGAGACCAACGAGGTCCCCACATATTTTGACTATGTGCCACAGTTTCTTCGC	DBLa0.18	0	6	0	1	5	0	0	0	0	4	0	0	0	0	0	0	3	0	0	0	0	0	0	0	0	2	0	0	0	0	0	0	2	0	0	0	0	0	0	0	0	0	0	0	0	0
#5_cluster_110	388	GAGACATTATACGAGGAAAAGATCTTTATGTTGGTAATagaaaagaaaaagaaaaagagaaattacaagaaaatttaaaaagaattttcgggaaaaTACATGGAAATTTGAAGGATGCACAAACTCACTACAATGATAATGATGGAAATTATTTTCAATTACGAGAAGATTGGTGGAACCTTAATAGACAACAAGTATGGAAAGCTATGATATGTGGTGCACCAGAAGAAGCTCATTATTTTAGAAAAACATGTTCTAATGGAAACACTCCTACTGAGGGAAATTGCAGATGTATTGATACAAATGTCCCTACCTATTTAGATTACGTCCCTCAATTTTTACGT	DBLa0.18	0	20	0	11	12	0	0	0	0	12	0	0	0	12	0	0	0	0	0	0	0	0	10	0	0	0	0	0	0	0	0	0	0	3	0	0	0	0	0	0	2	0	0	0	0	0
#5_cluster_107	234	GAGATATTGTAAGAGGAAGAGATCTCTATCGTGGTGGTAATACtaaagaaaaagaaaaaagaaaacaattagaagaaaatttgaaagaaaTTTTCGATAAAATTAAGAAAAGTGATGTAAAATTAACTTCCCTTAAAAATGAACAAATTAGGGAATATTGGTGGGAAGCTAATCGGCACACCGTGTGGGAAGCTATCACATGTCATGCAGGAGAAAGTGATAAATATTTTAGAAATGCATGTTCTAATAACACAACAGAGACTGATAAAAAATGCCGATGTCCCAATGGAGACCAGCCAAATACCGATCCCCCAACCTATTTCGACTATGTGCCACAGTATCTTCGG	DBLa0.6	2.34521e-93	2	0	1	1	0	0	0	0	1	0	0	0	1	0	0	0	0	0	0	0	0	1	0	0	0	0	0	0	0	0	0	0	1	0	0	0	0	0	0	1	0	0	0	0	0
#5_cluster_8	210	TGATATCGTACGCGGTAAAGATCCATTTTATGGTAATCCACAAGaaaaaaacaaaaaGAGAACAATTAGAAAAGAATTTGAAAGATATTTTCGCGAAAATACATGATGACGTGACGAAGACGAGCGACAAGAATGGGGAGCTACAAAAACGCTACACAAATGACGGTGGAAATTTTTTTCAATTACGAGAAGATTGGTGGACTGCTAATCGCGCCACAGTATGGAAAGCATTAACATGTAGCGAGGACCTAAATAATTCTTCATATTTTCATGCAACGTGCAGTGATGGTAAAGGAATTTGTTCTCAAGCTAATAACTACTGCCGGTGTGACGGCGACAAGCCACATGACGACAAGCGAAATACCGATCCCCCAACCTATTTTGACTATGTGCCGCAGT…	DBLa0.8	0	2	0	1	1	0	0	0	0	1	0	0	0	0	0	1	0	0	0	0	0	0	0	0	0	0	1	0	0	0	0	0	0	0	0	0	0	0	0	0	0	0	0	0	0	0
#5_cluster_93	177	GTGATATTGTCAGAGGAAGAGATCTATTTCATGGTAATCCACaagaaaaagaaaaaagagaagacttagaaaagaaattgaaagaaaTTTTCACGCAAATACATGATGACGTGATGAAGAACAACAGGGCGTTACAAGATCGATACACAGATACTAAAGATTATTTTCAATTACGAGAAGATTGGTGGACTGCTAATAGACAAGAAGTATGGAAAGCTATCACGTGCGAAGTTAAGAGTGGTTCTCATTATTTTCGACCAACATGTGGTGATAGTGGAAGTCCACATGTGACTCCTAGTCAATGCCGCTGTGACGGTAAAAATGCCCACCAGGTTCCCACATATTTCGATTATGTGCCACAGTTTCTTCGC	DBLa0.13	0	1	0	0	1	0	0	0	0	1	0	0	0	0	0	1	0	0	0	0	0	0	0	0	0	0	1	0	0	0	0	0	1	0	0	0	0	0	0	0	0	1	0	0	0	0
#5_cluster_3	141	AGATATTGTGAGAGGAAGAGATCTATTTCGTGGTAATGATaaagaaaaagatcaaagaaaaaaaattacaacaaaaattgaaaacaattttcaagaaaaTATATAAGGATTTGACGACGACGAATGCGAAGAAAGGCGCAAAAGATCGCTACGGAAAAGATCCAAATTTCTTTCAATTAAGAGAAGATTGGTGGGAAGCTAATCGTGAAACGGTATGGAAAGCTATCACATGCAAGGCGGAAGGTGCATATTTTCGGCCAACGTGCAGTGATAGTGCTGATAAAAAAGGTCCATCTCAAGCTAAGGATCACTGCCGGTGTGGCGACGGCGACAAGCCAAAGACCATCAAGGGAAGTGGCGACGGAGATGTAAATATTGTCCCCACATATTTTGACTACG…	DBLa0.13	0	1	0	1	1	0	0	0	0	1	0	0	0	0	0	1	0	0	0	0	0	0	0	0	0	0	1	0	0	0	0	0	0	0	0	0	0	0	0	0	0	0	0	0	0	0
#5_cluster_31	120	GTGATATCGTACGCGGCAAAGATCTGTATCGTGGTAATACACATGAAAGTAAACAAAGAGAAAATTTAGAAAAGAATTTGAAAGAAATTTTCGAGAAAATACATGAAGGATTGACGACGACGAATGGCGCAGAAGAACGCTACAAAAAAGATAAACAAACAGGAAATTATTTTCAATTAAGAGAAGATTGGTGGACAGCGAATCGGCACACCGTGTGGGAAGCTATCACATGTGGTGTAACAGATGGTGATAAATATTTTAGAAAAACAGCGTGTGGTACACGAACGGGAACACAAGGTCGATGCCGGTGTGACGGCGACAAGCCAAAGAGCGCAAAGGCCGGCGACGTAAATATTGTTCCCACATATTTCGATTATGTGCCTCAATATTTAAGA	DBLa0.11	0	1	0	0	0	0	0	0	0	0	0	0	0	0	0	0	0	0	0	0	0	0	0	0	0	0	0	0	0	0	0	0	0	0	0	0	0	0	0	0	0	0	0	0	0	0
#5_cluster_32	110	AGACATTATCAGAGGAAAAGATCTATTTCGTGGTTATAATGaaaaagatcaaaaagaaaaacaaaaattacaacaaaatttgaaggaaattttcaagaaaaTATATGGCAATTTGGTTCAGAATAAGCAGGATGCAGAAGAATGCTACAAAGATAAGGACGAAAATTATTTTAAATTACGAGAAGATTGGTGGACTGCAAATCGCTCCACAGTATGGAAAGCCATAACATGCAGCGACGAGCTAGCAAATTATAAATATTTTCGACAAACAGCGTGTGGTGAAGGAACAACTTCAACTCAAGGTTACTGCCGGTGTAACGGCGACAAGCCAGATGCCGACAAGCAAAATATCGATCCCCCAACCTATTTTTGATTATGTGCCGCAGTATCTTCGC	DBLa0.22	0	12	0	9	9	0	0	0	0	9	0	0	0	0	0	7	0	0	0	0	0	0	0	0	0	0	3	1	0	0	0	0	0	0	0	0	0	0	0	0	0	0	0	0	0	0
#5_cluster_20	107	AGATATTGTAAGAGGAAAAGATCTATATCTCGGTTATGATAATaaagaaaaagatcaaagaaaaaaattagaagagaatttaaaaaaaaaTTTTCGGGAATATATATAATGAGTTGACGAAGGGAGGGAAGAACGGCGCAAAAGACCGCTACAAAGATACTACAAATTATTATGAATTACGAGAAGATTGGTGGACTGCGAATCGGCACACCGTGTGGGAAGCCATCACGTGTGAAGTTAAGAGTGGTTCTCAATATTTTCGACCAACATGTGGTAGTGATGAAAACACTGCAACTCAGACTCCTAGTCAATGCCGCTGTAAGGACGAAAAGGGCGGAAAGCCCGGCGACGTAAATATTGTCCCCACATATTTTGACTATGTGCCGCAGTATCTTCGC	DBLa0.16	0	4	0	3	3	0	0	0	0	3	0	0	0	0	0	2	0	0	0	0	0	0	0	0	0	0	2	0	0	0	0	0	0	0	0	0	0	0	0	0	0	0	0	0	0	0
#5_cluster_51	94	AGATATTGTCAGAGAAAAAGATCTGTATCTCGGTTATGATGATaaagaaaaaaaagaaaaattagaactaaaattaaaaaGCTTTTTCAAGAATATATATGATGACTTGATAAAGGATCAAGGGAAGAAGGATGCAGCAATAAAACACTACTTTGATCGCAAAGAAAATTTTTATCGATTAAGAGAAGATTGGTGGATTGCTAATCGTGACCAAGTATGGGAAGCATTAATATGTCATGCGCCACCTGATGCTCAATATTTTCGAAAAACAGCATGTAATGGAGGAGAACAAACTAAAGGTTACTGCCGGTGTGGCGACGGCAAGTCAAAGGGCGCAGATGCCGACCAGGTCCCCACATATTTTGACTATGTGCCGCAGTATCTTCGC	DBLa0.5	0	3	0	2	2	0	0	0	0	2	0	0	0	0	0	2	0	0	0	0	0	0	0	0	0	0	1	1	0	0	0	0	0	0	0	0	0	0	0	0	0	0	0	0	0	0
#5_cluster_103	83	CGATATTATTCGCGGAAAAGATCTTTATGTTGGTAATAGAAaagaaaaagtaaaattagaagaaaatttgaaaaaccttttcaaaaaCTTATATAAAGAATTGACGAAGGACAACGATAATGGGGCCATAAAAACTCGTTACCAAAATGATAATGAAGAttttttttCAATTAAGAGAAGATTGGTGGAATGCTAATAGAAATGATATATGGAAAGCTCTAACATGTGATGCACCAAAAGATGCTCAATATACGAAAAAGGGACCACACAATCATATAACAGAATCTAATATGGGACAATGTAGATGTTTTACTGGAGATCCTCCTACTAATCTTGACTACGTGCCGCAGTTTCTTCGC	DBLa0.18	0	3	0	3	3	0	0	0	0	3	0	0	0	3	0	0	0	0	0	0	0	0	3	0	0	0	0	0	0	0	0	0	0	2	0	0	0	0	0	0	0	0	0	0	0	0
#5_cluster_64	81	AGATATTATCCGAGGGAAAGATCTATATCGTGGTGATaaagaaaaaaaaagaaaaattagaactaaaattaaaaaGCTTTTTCAAGAATATATATGATGACTTGATAAAGGATCAAGGGAAGAAGGATGCAGCAATAAAACACTACTTTGATCGCAAAGAAAATTTTTATCGATTAAGAGAAGATTGGTGGATTGCTAATCGTGACCAAGTATGGGAAGCATTAATATGTCATGCGCCACCTGATGCTCAATATTTTCGAAAAACAGCATGTAATGGAGGAGAACAAACTAAAGGTTACTGCCGGTGTGGCGACGGCAAGTCAAAGGGCGCAGATGCCGACCAGGTTCCCACATATTTCGATTATGTGCCACAGTTTCTTCGC	DBLa0.5	0	3	0	2	2	0	0	0	0	2	0	0	0	0	0	2	0	0	0	0	0	0	0	0	0	0	1	1	0	0	0	0	0	0	0	0	0	0	0	0	0	0	0	0	0	0
#5_cluster_115	75	AGACATTATCAGAGGAAAAGATCTTTATCGTGGTAATAAACAAGAAAAGGATAAATTACAAGATCAATTAAAAAAATATTTCAAGGAACTTCATAATAATTTAGAATCAGAAGCAAAAAAATTATTACAATGATGATACAAAAAAATTTTTTAAATTACGAGAAGATTGGTGGAATGCTAACAGACTCGATATATGGAAAGCTATAATATGCACAGCACCTGGTACTGCTCAATATTTTAGAAATGCTTGTGGTGGTGAACATACTATGACATATGGAAAATGTAGATGTGTCAATGGAGAGCCTCCTACAAATTTCGATTATATCCCTCAATATTTACGT	DBLa0.18	0	52	0	24	37	0	0	0	0	38	0	0	0	36	0	1	0	0	0	0	0	0	27	7	0	0	1	0	0	0	0	6	0	1	5	1	0	0	1	0	0	0	3	3	0	0
#5_cluster_117	55	TGATATTGTAAGAGGAATAGATATGTTTAAACCAAATGTCCATGACAAAGTAGAAAAGGGTCTCCGAGAGGTTTTCAAGAAAATACATGATGGAATGGAAGGTAAGGTAAAAAATTATTACAATCCTGATGAAGCTGGAAATTATTATAAATTAAGAGAAGCATGGTGGAATGTGAATAGAAATAAAGTATGGGAAGCCATAACCTGTGGGGCACTACCTAAATCTGCATATGTCTTGCAATCAGAAAATAATACACAATTACCTTCATATCTTAAATGCGGCCATAATAATAAGGATGATCCTCCTACCAATTTAGATTATGTTCCTCAATATTTACGT	DBLa1.1	0	200	136	0	0	145	0	0	147	0	0	1	0	146	0	0	0	0	0	0	0	0	140	0	1	0	0	0	0	0	0	0	133	0	0	0	0	0	120	0	0	0	0	0	0	0
#5_cluster_116	52	CGATATTATAAGAGGAAAAGATCTGTATCTTGGTAATAACaaagaaaaagaaaatttagaaaaaaatttaagacaaattttcaaaaaaaTATATGACAAATTGGAGAATACTGATGTACAAAAACACTACCAAGATAATGACGGAAATTATTATCAATTACGAGAAGATTGGTGGAACATTAATAGACAACAAGTATGGAAAGCTATCACATGCGACGCTGCGGGTGGTACATATTTTCGAAAAACATGTTCGAAGGGAGAAAGTCACGTTAATGATAAATGCCGATGTCTGATTGGAGATGTTCCCACATATTTTGACTACGTGCCACAATATTTGAGA	DBLa0.8	0	2	0	1	1	0	0	0	0	1	0	0	0	0	0	1	0	0	0	0	0	0	0	0	0	0	1	0	0	0	0	0	0	0	0	0	0	0	0	0	0	0	0	0	0	0
#5_cluster_21	29	TGATATTATCAGAGGAAAAGATCTTTTCCTTGGTAATACATATGAAAGTGCACAAAGAATAATATTAGATGATAAGTTGaaaaaaaaTTTTCGGGAAAATACATGATAATTTGAAGAATGCACGAACTCACTACAGTGATACTACAAATTATTATCAATTACGAGAAGATTGGTGGTATGCTAATCGAGAAACAGTATGGAAAGCTATCACGTGCGAAGCTGGGAGTGGTAAATATTTTCGAGCAACATGTGGTGGTGATAATGAAAACACTGCAACTCAGGCTAAAAACAAATGCCGGTGTGGCGACGGCAAGCCAAAGGCCGGCAAGCCAAAGGCTGGCAACGGCGACGTAAGTATTGTCCCCACATATTTTGACTACGTGCCGCAGTATCTTCGC	DBLa0.8	0	2	0	1	1	0	0	0	0	1	0	0	0	0	0	1	0	0	0	0	0	0	0	0	0	0	1	0	0	0	0	0	0	0	0	0	0	0	0	0	0	0	0	0	0	0
#5_cluster_98	29	CGATATTATTCGAGGAAAAGATCTATTTCTTGGTAATAGTAAAGAAAAATTGATTTTACAAGAAAAATTAAAAGAATATTTCCAGATAATATATGAAAAATTGGATGAAAAGAACGTGGGAGCAAAAGAACACTACAAAGAAGATAAAGAAACAGGAAATTATTATCAATTACGTGAAGATTGGTGGAATGCTAATAGACAACAGGTATGGAAAGCTATTACATGTGGTGCAGGACAAAATGATAAATATTTTCGACACACATGTGGTGCAGGAAACGATCGAAGTGAGACTAAAAATAACTGCCAATGTATCAGTGGAGATCCTCCTACATATTTTGACTACGTGCCGCAGTATCTTCGC	DBLa0.18	0	6	0	1	5	0	0	0	0	4	0	0	0	0	0	0	3	0	0	0	0	0	0	0	0	2	0	0	0	0	0	0	2	0	0	0	0	0	0	0	0	0	0	0	0	0
#5_cluster_60	17	AGATATTATACGAGGAAAAGATCTATTTTATGGTAATCCACAAGAAAGTACACAAAGAAAAAAATTAGATGATAAGTTGAAAGAGGTTTTTGGGAAAATACATAGTGAAGTGACGACAAATGGGAAGAATGTGGATACGCTACAAGCTCGCTACAAAGATGATTACaaaaaaaaTTTTTATCGATTAAGAGAAGATTGGTGGACAGCGAATCGAGAAACGGTGTGGGAAGCAATTACATGTAAAGCTAAGGAAGCTGATAAATATTTTAGAAATACATGTTCTAATGACACATCAGACACTAACGAAAAATGCCGATGTGACGGCAAAAAGCCCGGCGCAAGTGTTGTTCCCACATATTTTGACTACGTGCCGCAGTATCTTCGC	DBLa0.16	0	4	0	3	3	0	0	0	0	3	0	0	0	0	0	2	0	0	0	0	0	0	0	0	0	0	2	0	0	0	0	0	0	0	0	0	0	0	0	0	0	0	0	0	0	0
#5_cluster_82	12	AGATGTTGTAAGAGGAAAAGATCTGTATCTTGGTAATCCACAAGAAAGTGCAAGAAGAGATAAATTAGAAAATAAGTTGAAAGAAATTTTCGGGGATATATATGAAGAATTGAAGAAGAAGAAGGGGAGGAATGGGCAGATAGAAGCACGCTACAAAAAAGATGAAGAAGACAAAAATTTTTATCAATTAAGAGAAGATTGGTGGACAGAGAATCGAGAAACAGTATGGAAAGCTATCACGTGCGGTGCGCCAAATAATGCTCAATATTTTCGAGGAACATGTTCTAATGACACAACTTCGGCTAAAAATAACTGCCGATGTCCCAAAGGCGACCAGGTCCCCACATATTTCGACTATGTGCCGCAGTATCTTCGC	DBLa0.11	0	2	0	0	1	0	0	0	0	1	0	0	0	0	0	1	0	0	0	0	0	0	0	0	0	0	1	0	0	0	0	0	0	0	0	0	0	0	0	0	0	0	0	0	0	0
					# hits in varDB	NTSA	NTSB	DBLa0	DBLa1	DBLa2	DBLpam1	CIDRa1	CIDRa2-6	CIDRb	CIDRg	CIDRd	DBLb	DBLg	DBLd	DBLe	DBLz	CIDRb	CIDRg	CIDRd	DBLb	DBLg	DBLd	DBLe	DBLz	CIDRb	CIDRg	CIDRd	DBLb	DBLg	DBLd	DBLe	DBLz	CIDRb	CIDRg	CIDRd	DBLb	DBLg	DBLd	DBLe	DBLz	CIDRb	CIDRg	CIDRd	DBLb
				Sample_total:	326	136	64	88	145	0	0	147	87	0	1	0	198	0	22	6	0	0	0	0	0	181	7	1	4	16	3	0	0	0	6	138	7	5	1	0	0	121	0	3	1	3	3	0	0
Interpreted Results				Position D1	Position D1	Position D2	Position D2	Position D2	Position D2	Position D3	Position D3	Position D3	Position D3	Position D3	Position D3	Position D4	Position D4	Position D4	Position D4	Position D4	Position D4	Position D4	Position D4	Position D5	Position D5	Position D5	Position D5	Position D5	Position D5	Position D5	Position D5	Position D6	Position D6	Position D6	Position D6	Position D6	Position D6	Position D6	Position D6	Domain 07	Domain 07	Domain 07	Domain 07	Domain 07	Domain 07	Domain 07	Domain 07	Domain 08	Domain 08
Patient ID_cluster #	Cluster size			NTSA	NTSB	DBLa0	DBLa1	DBLa2	DBLpam1	CIDRa1	CIDRa2-6	CIDRb	CIDRg	CIDRd	CIDRa1.2-3	DBLb	DBLg	DBLd	DBLe	DBLz	CIDRb	CIDRg	CIDRd	DBLb	DBLg	DBLd	DBLe	DBLz	CIDRb	CIDRg	CIDRd	DBLb	DBLg	DBLd	DBLe	DBLz	CIDRb	CIDRg	CIDRd	DBLb	DBLg	DBLd	DBLe	DBLz	CIDRb	CIDRg	CIDRd	DBLb	DBLg
#5_cluster_30	407			0	1	1	0	0	0	0	1	0	0	0		0	0	0	1	0	0	0	0	0	0	0	0	1	0	0	0	0	0	0	1	0	0	0	0	0	0	0	0	0	0	0	0	0	0
#5_cluster_110	388			0	1	1	0	0	0	0	1	0	0	0		1	0	0	0	0	0	0	0	0	1	0	0	0	0	0	0	0	0	0	0	1	0	0	0	0	0	0	1	0	0	0	0	0	0
#5_cluster_107	234			0	1	1	0	0	0	0	1	0	0	0		1	0	0	0	0	0	0	0	0	1	0	0	0	0	0	0	0	0	0	0	1	0	0	0	0	0	0	1	0	0	0	0	0	0
#5_cluster_8	210			0	1	1	0	0	0	0	1	0	0	0		0	0	1	0	0	0	0	0	0	0	0	0	0	1	0	0	0	0	0	0	0	0	0	0	0	0	0	0	0	0	0	0	0	0
#5_cluster_93	177			0	0	1	0	0	0	0	1	0	0	0		0	0	1	0	0	0	0	0	0	0	0	0	0	1	0	0	0	0	0	1	0	0	0	0	0	0	0	0	1	0	0	0	0	0
#5_cluster_3	141			0	1	1	0	0	0	0	1	0	0	0		0	0	1	0	0	0	0	0	0	0	0	0	0	1	0	0	0	0	0	0	0	0	0	0	0	0	0	0	0	0	0	0	0	0
#5_cluster_31	120
#5_cluster_32	110			0	1	1	0	0	0	0	1	0	0	0		0	0	1	0	0	0	0	0	0	0	0	0	0	1	0	0	0	0	0	0	0	0	0	0	0	0	0	0	0	0	0	0	0	0
#5_cluster_20	107			0	1	1	0	0	0	0	1	0	0	0		0	0	1	0	0	0	0	0	0	0	0	0	0	1	0	0	0	0	0	0	0	0	0	0	0	0	0	0	0	0	0	0	0	0
#5_cluster_51	94			0	1	1	0	0	0	0	1	0	0	0		0	0	1	0	0	0	0	0	0	0	0	0	0	0	0	0	0	0	0	0	0	0	0	0	0	0	0	0	0	0	0	0	0	0
#5_cluster_103	83			0	1	1	0	0	0	0	1	0	0	0		1	0	0	0	0	0	0	0	0	1	0	0	0	0	0	0	0	0	0	0	1	0	0	0	0	0	0	0	0	0	0	0	0	0
#5_cluster_64	81			0	1	1	0	0	0	0	1	0	0	0		0	0	1	0	0	0	0	0	0	0	0	0	0	0	0	0	0	0	0	0	0	0	0	0	0	0	0	0	0	0	0	0	0	0
#5_cluster_115	75			0	1	1	0	0	0	0	1	0	0	0		1	0	0	0	0	0	0	0	0	1	0	0	0	0	0	0	0	0	0	0	0	0	0	0	0	0	0	0	0	0	0	0	0	0
#5_cluster_117	55			1	0	0	1	0	0	0		0	0	0	1	1	0	0	0	0	0	0	0	0	1	0	0	0	0	0	0	0	0	0	1	0	0	0	0	0	1	0	0	0	0	0	0	0	0
#5_cluster_116	52			0	1	1	0	0	0	0	1	0	0	0		0	0	1	0	0	0	0	0	0	0	0	0	0	1	0	0	0	0	0	0	0	0	0	0	0	0	0	0	0	0	0	0	0	0
#5_cluster_21	29			0	1	1	0	0	0	0	1	0	0	0		0	0	1	0	0	0	0	0	0	0	0	0	0	1	0	0	0	0	0	0	0	0	0	0	0	0	0	0	0	0	0	0	0	0
#5_cluster_98	29			0	1	1	0	0	0	0	1	0	0	0		0	0	0	1	0	0	0	0	0	0	0	0	1	0	0	0	0	0	0	1	0	0	0	0	0	0	0	0	0	0	0	0	0	0
#5_cluster_60	17			0	1	1	0	0	0	0	1	0	0	0		0	0	1	0	0	0	0	0	0	0	0	0	0	1	0	0	0	0	0	0	0	0	0	0	0	0	0	0	0	0	0	0	0	0
#5_cluster_82	12			0	0	1	0	0	0	0	1	0	0	0		0	0	1	0	0	0	0	0	0	0	0	0	0	1	0	0	0	0	0	0	0	0	0	0
			Hit Rate:	0.0227179	0.849649	0.927716	0.0227179	0	0	0	0.927716	0	0	0	0.0227179	0.344899	0	0.425444	0.180091	0	0	0	0	0	0.344899	0	0	0.180091	0.35316	0	0	0	0	0	0.275919	0.291202	0	0	0	0	0.0227179	0	0.256919	0.0731103	0	0	0	0	0
Suggested Composition
Patient ID_cluster #
#5_cluster_30	NTSB7	DBLa0.12	CIDRa2.11	DBLe2	DBLz3	DBLe2
#5_cluster_110	NTSB3	DBLa0.18	CIDRa5	DBLb5	DBLg10	DBLz	DBLe
#5_cluster_107	NTSB3	DBLa0.6	CIDRa3.1	DBLb5	DBLg13	DBLz2	DBLe3
#5_cluster_8	NTSB3	DBLa0.8	CIDRa2.2	DBLd1	CIDRb1
#5_cluster_93		DBLa0.13	CIDRa2.9	DBLd1	CIDRb3	DBLe2	DBLz3	DBLe2
#5_cluster_3	NTSB3	DBLa0.13	CIDRa2.3	DBLd1	CIDRb3
#5_cluster_31
#5_cluster_32	NTSB3	DBLa0.22	CIDRa3.1	DBLd1	CIDRb1
#5_cluster_20	NTSB3	DBLa0.16	CIDRa3.4	DBLd1	CIDRb1
#5_cluster_51	NTSB3	DBLa0.5	CIDRa2.6	DBLd1
#5_cluster_103	NTSB6	DBLa0.18	CIDRa4	DBLb5	DBLg	DBLz4
#5_cluster_64	NTSB3	DBLa0.5	CIDRa2.6	DBLd1
#5_cluster_115	NTSB6	DBLa0.18	CIDRa4	DBLb	DBLg
#5_cluster_117	NTSA1	DBLa1.1	CIDRa1.2	DBLb11	DBLg1	DBLe1	DBLg1	DBLz1	DBLe1
#5_cluster_116	NTSB3	DBLa0.8	CIDRa2.2	DBLd1	CIDRb1
#5_cluster_21	NTSB3	DBLa0.8	CIDRa2.2	DBLd1	CIDRb1
#5_cluster_98	NTSB7	DBLa0.12	CIDRa2.11	DBLe2	DBLz3	DBLe2
#5_cluster_60	NTSB3	DBLa0.16	CIDRa3.4	DBLd1	CIDRb1
#5_cluster_82		DBLa0.11	CIDRa2.4	DBLd1	CIDRb6
[truncated: 177 more columns]

## Sheet: #6
	Total reads	Singletons
	2060	106
						Position D1	Position D1	Position D2	Position D2	Position D2	Position D2	Position D3	Position D3	Position D3	Position D3	Position D3	Position D4	Position D4	Position D4	Position D4	Position D4	Position D4	Position D4	Position D4	Position D5	Position D5	Position D5	Position D5	Position D5	Position D5	Position D5	Position D5	Position D6	Position D6	Position D6	Position D6	Position D6	Position D6	Position D6	Position D6	Domain 07	Domain 07	Domain 07	Domain 07	Domain 07	Domain 07	Domain 07	Domain 07	Domain 08
Patient ID_cluster #	Cluster size	Blast cluster sequence	Best Blast hit	E-value	# hits in varDB	NTSA	NTSB	DBLa0	DBLa1	DBLa2	DBLpam1	CIDRa1	CIDRa2-6	CIDRb	CIDRg	CIDRd	DBLb	DBLg	DBLd	DBLe	DBLz	CIDRb	CIDRg	CIDRd	DBLb	DBLg	DBLd	DBLe	DBLz	CIDRb	CIDRg	CIDRd	DBLb	DBLg	DBLd	DBLe	DBLz	CIDRb	CIDRg	CIDRd	DBLb	DBLg	DBLd	DBLe	DBLz	CIDRb	CIDRg	CIDRd	DBLb
#6_cluster_149	267	GCGATATTATCAGAGGAAGAGATATGTTTAAATCTAATGGAAAAGTAGAAAAAGCTCTAAGAGAAGTTTTCAAGAAAATACATAGTGGTTTGAATAAAAGCAAAATTAATGATTATGATCATGATGGTACTGGAAACTACGTAAAATTAAGGGAAGATTGGTGGACGGCTAACCGCGATCAAGTATGGAAAGCATTAACATGTTCTGCACCGTATGATGCTAACTATTATCGAAAATATTCAGATAAAAGTATGGATTTTACAAGTCAAGGACAATGTGGCCACACGGAAGGAACTGTTCCTACAAATCTTGATTATGTCCCTCAATTTTTAAGA	DBLa1.7	0	62	39	0	0	40	0	0	18	0	2	1	20	28	13	0	0	0	0	0	0	14	20	5	1	0	0	0	0	0	13	13	3	0	3	1	0	3	1	3	0	1	10	1	1	1
#6_cluster_67	228	GAGACATTATAAGAGGAAAAGATCTGTATCTCGGTAATCCGCAAGAAAGTGCACAAAGAGATAAATTAGAAAAGAATTTGAAAGAAATTTTCGAGAAAATACATAGTGGATTGGATGATAAAATAAAATCAAAGTATAATGGTGATACTGAAAATTATTATCAATTAAGGGAAGATTGGTGGTATGCTAATCGAGAAACAGTATGGAAAGCCATCACGTATGAAGTTAAGAGTGGTTCTGACTATTTTCGACCAACATGTGGTGGTGATAGTGAAAGTCCATCTCAAGCTCATGACAAATGCCGATGTCACAATGGTAAAAATGCCGACCAGGTTCCCACCTATTTCGATTATGTGCCACAATATTTGAGA	DBLa0.14	2.57272e-78	1	0	0	0	0	0	0	0	0	0	0	0	0	0	0	0	0	0	0	0	0	0	0	0	0	0	0	0	0	0	0	0	0	0	0	0	0	0	0	0	0	0	0	0	0
#6_cluster_90	136	AGACATTGTACGAGGAAAAGATCTTTTCCTCGGTAATGATaaagaaaaagaaaaaagaaaacaattagaaaaggaattgaaagATATTTTCAAGAATATATATGACAAATTGAAGAATGGGAAGACGAATGGCGCAGAAGCACGCTACAAAGATACTGATAATTATTATGAATTAAGAGAAGATTGGTGGACAGAGAATCGAGAAACAGTATGGAAAGCATTAACATGCAAGGCTGACGATAGTAATAGATATTTTCGACCAACATGTGCTGGAGGAACAACTTCAACTCAAGGTAAATGCCGATGTCCCAATGGTAACAACCAGGTCCCCACATATTTTGACTATGTGCCACAGTATCTTCGC	DBLa0.18	0	3	0	2	2	0	0	0	0	2	0	0	0	2	0	0	0	0	0	0	0	0	1	0	0	1	0	0	0	0	0	0	1	1	0	0	0	0	0	0	1	0	0	0	0	0
#6_cluster_142	113	TGATATTATTCGTGGAAAAGATCTTTATCGTGGAAATAAACAAGAAAAAGATGCATTACAAGAGCAATTAAAGAAATATTTCAAGCAATTACATATTAATTTGCAACATCCAGCAAAAAGCCATTATAATGACCCAAGCGGAAATTTTTATCAACTAAGGGAAGATTGGTGGAATGCCAATAGGCAAGAAATATGGAAAGCTATTACATGCAAGGCAACTGATACTCAATATTTTAGAAATACATGTTCTGGTGGTGAAAGTCCGACAACTGTAGAATGTCACTGCATTGATGGAACTGTCCCTACAAATTTAGATTATGTCCCTCAATTTTTACGTT	DBLa0.18	0	18	0	9	12	0	0	0	0	12	0	0	0	3	0	9	0	0	0	0	0	0	0	2	0	0	6	2	0	0	0	0	0	0	2	0	0	0	0	0	0	0	0	0	0	0
#6_cluster_143	101	GTGATATTATTCGCGGCAAAGATCTTTATATTCGTAATAAACAAGAAAAAGATAGATTAGAAGAGAATTTACAAAAAATTTTCGGGCATATATATGAAGAATTGACGAACGGCGCACAAACTTACTACAATGATGATAAAGAAAATTATTATAAATTAAGGGAAGATTGGTGGAACGCTAATAGACAACAAGTATGGAATGCTATAATATGTGGTGTAGAAAAAAACGAGAAATATTTTAAAAACACATGTTCATCTAAAGGTGGGCATTATGAAAAATGCCGATGTATTAATGGCGACGTTCTTACGAATTTCGATTATGTTCCGCAGTATCTTCGC	DBLa2	0	5	0	3	0	0	4	0	4	0	0	0	0	4	0	0	0	0	0	0	0	0	3	0	0	0	0	0	0	0	0	0	1	1	0	0	0	0	0	0	2	0	0	0	0	0
#6_cluster_40	96	AGATATTATAAGAGGAAAAGATCTATTTCGTGGTTATGATGATgaagaaaaaaaccgaagagaaaaattagaaaataagttgaaagaaaTTTTCAAGAATATATATATAAGGACGTGATGAAGACGAGCGGGAGTAATGGGCAGAAGTCGGCGGAAGCAAAAGATCGCTACAAAGATACTAAAAATTATTATCAATTACGAGAAGATTGGTGGGACGCAAATCGCGCCAAAGTATGGTATGCTATGACGTGTGGTGCAGGACAAAATGATAAATATTTTCGACAATCATGTTCTGGTGGAAAAACTTGGACTAATGAAAAATGCCGATGCGTAAACCGTGCAGATGTTCCCACATATTTCGATTATGTGCCGCAGTTTCTTCGC	DBLa0.9	0	3	0	3	3	0	0	0	0	3	0	0	0	0	0	3	0	0	0	0	0	0	0	0	0	0	2	1	0	0	0	0	0	0	0	0	0	0	0	0	0	0	0	0	0	0
#6_cluster_137	78	GCGATATTGTAAGAGGAAAAGATCTATATAGTGGTAATAACaaagaaaaagttaaattagaaaagaaattaaaaaGAATTTTCGGGATAATATATGGAAAATTGAATGGTGTAAAAGACCACTACAAAGATGCAACTGGAGATTTTTTTAAATTAAGAGAAGATTGGTGGACTGCTAATAGAAACGATGTATGGAAAGCATTAACATGTAACGCTCAAGGTAATACATATTTTCGACAAACAGCGTGTGCAGGAACGCGGACTAATGACAAATGCCGATGTGACGACAAGGCAAATGTCGATCCCCCAACCTATTTCGATTATGTGCCGCAGTATCTTCGC	DBLa0.8	2.85985e-122	1	0	0	0	0	0	0	0	0	0	0	0	0	0	0	0	0	0	0	0	0	0	0	0	0	0	0	0	0	0	0	0	0	0	0	0	0	0	0	0	0	0	0	0	0
#6_cluster_66	74	GTGATATCGTACGCGGCAAAGATCTTTTCCTTGGTAATACATATGAAAGTGCACAAAGAGATCAATTAGAGAAGAATTTGAAAGATATTTTCACGCAAATATATAATGACGTGACAAATGATCAGACGAAGAAGGCGGAAGCAGAAAAACGCTACAATGATACTACAAATTATTTTCAATTAAGAGAAGACTGGTGGGCACTTAATAGAGAAACGGTATGGAAAGCCATAACATGTAGCGAGGACCTAAAAAATTCTTCATATTTTCGAGCAACATGTGGTAGTAGTGGAGAAACTCCGACTGATGATAAATGCCGATGTAGCGACAACCAAGTCCCAACATATTTTGAATACGTGCCACAGTATCTTCGC	DBLa0.5	0	1	0	0	1	0	0	0	0	1	0	0	0	1	0	0	0	0	0	0	0	0	0	1	0	0	0	0	0	0	0	0	0	0	1	0	0	0	0	0	0	0	0	0	0	0
#6_cluster_20	73	TGATATCGTACGCGGCAAAGATCTTTTCCTTGGTAATACATATGAAAGTGCACAAAGAGATCAATTAGAGAAGAATTTGAAAGATATTTTCGCGAAAATACATAGTGAAGTGAGGAGAGGGAGTAATTGGCAGGCTCTAAAAACACGCTACGAAAATGATAATGAAAATTATTATCAATTACGAGAAGATTGGTGGACTGCGAATCGCGCCACAATCTGGGAAGCTATCACGTGCAACGACGACAAGAAGCTATCAAGTGCTTCATATTTTCGAGAAACGTGCAGTGATCGTAATGGAAATAGTCAGTATCAAACTCAAAACCAATGCCGATGTCCCAATGGTAACAACCAGGTCCCCACATATTTTGACTATGTGCCACAGTATCTTCGC	DBLa0.14	2.57272e-78	1	0	0	0	0	0	0	0	0	0	0	0	0	0	0	0	0	0	0	0	0	0	0	0	0	0	0	0	0	0	0	0	0	0	0	0	0	0	0	0	0	0	0	0	0
#6_cluster_28	72	AGATATTGTCAGAGGAAAAGATCTATTTTATGGAAATACACaagaaaaagatcaaagaaaaaaattacaacaaaatttgaaaaaaattttcgagaaaaTACATGGTAACGTGACGAGCGACAAGAATGGGCAGGCTCTAAAAACACGCTACGAAGGTGATaaaaaaaaTTATTTTTATCAATTAAGGGAAGATTGGTGGGACGCGAATCGGCACACCGTGTGGGAAGCCATGACATGCAGCGACAAGCTAAAAAATTCTGCATATTTTCGACCAACGTGCGATAGTAGTGATGaaaaaaaaTTCAACTCTTGCTAGTAACAAATGCCGATGTCCCAATGGTAACAACCAGGTCCCCACATATTTTGACTATGTGCCACAGTATCTTCGC	DBLa0.5	0	32	0	27	31	0	0	0	0	31	0	0	0	0	0	29	0	0	0	0	0	0	0	0	0	0	21	6	0	0	0	0	1	1	0	0	0	0	0	0	2	0	0	0	0	0
#6_cluster_56	65	GTGATATCATACGAGGAAGAGATCTTTTCCTCGGTAATGATAAAGAAAAAGATCAAAGAAAACAATTAGATGATAATTTGAAAGATATTTTCGCGAAAATATATGACAATTTGGGTAAGAATAAGGAGGATGCAAAAGGACACTACGGAGGTGATAAAGATTTCTTTCAATTACGAGAAGACTGGTGGGATGCTAATAGAAAAGAGGTATGGAAAGCATTAACATGCGGTGCGCCAGAAGGTGCTTCATATTTTCGTGCAACATGTAGTGGAGGAAATCTAACATATAACAAATGCCGTTGTCAGAAGAAAGACGGCAAAAGTGAGACCGACCAGGTCCCCACCTATTTTGACTATGTGCCGCAGTATCTTCGC	DBLa0.14	2.57272e-78	1	0	0	0	0	0	0	0	0	0	0	0	0	0	0	0	0	0	0	0	0	0	0	0	0	0	0	0	0	0	0	0	0	0	0	0	0	0	0	0	0	0	0	0	0
#6_cluster_53	60	AGATATTGTAAGAGGAAAAGATCTGTATCTCGGTTATGATGAtaaagaaaaaaaccgaagacaaaaaaatagaagagaatttgaaagaaattttcgggaaaaTACATAGTGAAGTGACGAGCGACAAGAATGTGGAGCTACAAAAACGCTACAAAGATATTAATGATCCAAATTTTTATAAATTACGAGAAGATTGGTGGACAGCGAATAGGCACACCGTGTGGGAAGCTATCACGTGCAAGGCGGAGCAGAATAATAAATATTTTAGAAAAACAGCGTGTGCAGGAAAAACTCCGAATCAAGGTCGATGCCGATGTGACGACATTCCAAATACCGATCCCCCAACCTATTTTGATTATGTGCCACAGTTTCTTCGC	DBLa0.16	0	2	0	0	1	0	0	0	0	1	0	0	0	0	0	1	0	0	0	0	0	0	0	0	0	0	1	0	0	0	0	0	0	0	0	0	0	0	0	0	0	0	0	0	0	0
#6_cluster_168	59	AGACATTATACGAGGAAAAGATCTGTATCGTCGTGATAATAAAAAAGATAAATTAGAAGAGAATTTACAAAAAATTTTCAAGAAAATACATGACAAATTGGATAATAGCATAAAATCAAACTATAATGATGCTCCATATTATTATAAATTACGAGAAGATTGGTGGTATGCTAATAGAATAATGGTATGGAACGCGATAACATGCGGCGTTAAGGGTAATAAATATTTTCGACCAACATGTGTTTCAGGAGAATCGACTAAAGAGAATTGCCAATGTACTAGTTATAAGGTCCCCACATATTTCGATTATGTGCCGCAGTATCTTCGC	DBLa0.9	1.178e-180	17	0	13	16	0	0	0	0	16	0	0	0	0	0	15	1	0	0	0	0	0	0	0	0	1	13	2	0	0	0	0	2	2	0	0	0	0	0	0	2	0	0	0	0	0
#6_cluster_19	57	GTGATATCGTACGCGGCAAAGATCTTTTCCTTGGTAATACATATGAAAGTGCACAAAGAGATAAATTAGAACAGAAATTGAAAGATATTTTCAAGGAAATACATGAGGACGTGATGAAGAACAACGGGGCGTTACAAGCTCGATACACAGATAATAAAAATTATTATCAATTACGAGAAGATTGGTGGAATGCAAATCGCTCCACAGTATGGAAAGCATTAACATGTGACCACAGGCTAGCAAGTGCTTCATATTTTCGACCAACGTGCAGTATGAATGGAAGTTGTTCTCAAGCTAATAAATACTGCCGGTGTAACGGCGACCAGCCAGGTAACGACAAGGAAAATACCGATCCCCCAACCTATTTTGACTATGTACCGCAGTTTCTTCGC	DBLa0.1	3.19754e-137	4	0	3	3	0	0	0	0	3	0	0	0	0	0	2	0	0	0	0	0	0	0	0	0	0	1	0	0	0	0	0	0	0	0	0	0	0	0	0	0	0	0	0	0	0
#6_cluster_150	53	AGATATTGTAAGAGGAAGAGATATGTTTAAATCTAATGAAATGGTAGAAATCGGTCTAAAAAAGGTTTTCAAGAAAATACATGGTAAATTAAATGGAGCTGCAATATCATATTACGATGCTGATGAAAAAGGAAATTTTTATAAATTAAGAGAAGCATGGTGGAATGTGAATAGAAATAAAGTATGGGAAGCCATAACATGTAAAGCTCCACAAAAAGCTAATTATTTTAGAAAAGGTTCAGATGGTAGTGATGTTTTTACAAGTCAAGGATATTGTGGTCGTAAGGAACTAACCGTTCCTACCTATTTAGATTACGTCCCTCAATTTTTACGT	DBLa1.2	0	93	63	0	0	66	0	0	70	0	0	0	0	2	28	0	0	11	0	0	0	1	37	1	0	0	0	0	0	0	33	1	0	0	1	0	0	1	12	17	0	0	1	0	0	0
#6_cluster_138	53	TGATATTGTAAGAGGAATAGATATGTTTAAACCAAATGTCCATGACAAAGTAGAAAAGGGTCTCCGAGAGGTTTTCAAGAAAATACATGATGAAATGGAAGGTGAGGTAAAAAAATTATTACAATCCTGATGGATCTGGAAATTATTATAAATTAAGAGAAGCATGGTGGGATGTGAATAGAAATAAAGTATGGGAAGCCATAACCTGTGGCGCACTACCTAAATCTGCATATTTCTTGCAATCAGAAGATAATAAACAATTATTTTTATATCCTAAATGCGGCCATAATAATAAGAATGATCTTCCTACCAATTTAGATTATGTTCCTCAATATTTACGT	DBLa1.1	0	200	149	0	0	157	0	0	155	2	0	0	0	155	0	0	0	0	0	0	0	0	145	0	0	0	0	0	0	0	0	0	129	0	0	0	0	0	112	0	0	0	0	0	0	0
#6_cluster_130	40	GTGATATTATAAGAGGAAAGGATCTTTATCTTGGAAATAGCaaagaaaaagaaaaattagaaaaaaatttaagacaaattttcaaaaaaaTATATGACAAATTGACACATGATGCACAAACTCACTACAAAAAAGATGATAAAGGAAGTGGAAATTATTTTCAATTAAGAGAAGATTGGTGGAATGCCAATAGACAACAAGTTTGGAAAGCCATTACATGCAAAGCGGAAAATGCTCAATATTTTAGAAATACCTGTTCTATGGAAAAAAATTCTACGCAAACAAACTGTCAATGTATTGATGGAGAAGTTCCTACATATTTCGATTATGTGCCTCAATATTTACGT	DBLa0.18	0	3	0	2	2	0	0	0	0	2	0	0	0	2	0	0	0	0	0	0	0	0	1	0	0	1	0	0	0	0	0	0	1	1	0	0	0	0	0	0	1	0	0	0	0	0
#6_cluster_68	37	AGATATTGTAAGAGGAAGAGATTTGTATGGTGGTAATAAACaagaaaaagaaaaaagagatgaattagagaagaatttacaaaaaaTTTTTAGGAATATATATGACAAATTATTAGAGTATAACAAGACGAATGGGGAGATAGAAGCTCGCTACGGAAGTGATAAAGATCCAAATTTCTTTCAATTACGAGAAGATTGGTGGGACGCTAATAGAGAAAAAGTATGGAAAGCTATCACATGTAAAGCAAATGATGATGATAAATATTTTAGAAAAACAGCGTGTGCAGGAAAAACTCCGACTGATGATAAATGCCGGTGTAACGACGACCAGGTCCCCACCTATTTTGACTACGTCCCTCAGTATCTTCGC	DBLa0.11	0	3	0	3	3	0	0	0	0	3	0	0	0	0	0	3	0	0	0	0	0	0	0	0	0	0	2	1	0	0	0	0	0	0	0	0	0	0	0	0	0	0	0	0	0	0
#6_cluster_101	35	GTGATATCGTACGCGGCAAAGATCTTTTTATAGGTTATAATgaaaaagatcaagaagaaaaaagaaaattacaagagaacttgagaaaaaTTTTCAAGGAAATATATAATAAATTGGGGGATACTGGAGCACAAGAACGCTACGAAGGTGATGAAGCCAATGATTTTTTTAAATTACGAGAAGATTGGTGGGATGCTAATAGACTAGAAGTATGGAAAGCTATCACTTGTGGTGCAGGAGAAAGTGATAAATATTTTAGAAAAACATGTTCTTCCGGAAATTCTAAGACGAGTGGACATTGTAAGTGTATTGATGGAACAGTTCCTACCAACTTGGATTATGTTCCTCAATATTTGAGA	DBLa0.12	0	4	0	3	3	0	0	0	0	3	0	0	0	3	0	0	0	0	0	0	0	0	3	0	0	0	0	0	0	0	0	0	0	3	0	0	0	0	0	0	2	0	0	0	0	0
#6_cluster_105	30	AGATATCGTACGCGGTAAAGATCTTTTCCTCGGTAATGATaaagaaaaagaaaaaagaaaacaattagaaaaggaattgaaagATATTTTCAAGAATATATATGACAAATTGAAGAATGGGAAGACGAATGGCGCAGAAGCACGCTACAAAGATACTGATAATTATTATGAATTAAGAGAAGATTGGTGGACAGAGAATCGAGAAACAGTATGGAAAGCATTAACATGCAAGGCTGACGATAGTAATAGATATTTTCGACCAACATGTGCTGGAGGAACAACTTCAACTCAAGGTAAATGCCGATGTAACGACAACCAGGTCACCACATATTTTGACTATGTGCCGCAGTATCTTCGC	DBLa0.14	2.57272e-78	1	0	0	0	0	0	0	0	0	0	0	0	0	0	0	0	0	0	0	0	0	0	0	0	0	0	0	0	0	0	0	0	0	0	0	0	0	0	0	0	0	0	0	0	0
#6_cluster_8	27	AGATATTGTGAGAGGAAGAGATCTTTTTATAGGTTATAATCaaaaagatagagaacaaaaacaaaaaatacaagataatttgaaagatattttcaagaaaaTACATAAGGAAGTGACGAACAGGAAGACGAATGAAGAGGCAGCAAAAGCTCGCTACGGAAATGATCCTAAAGAAAATTATTATCAATTACGAGAAGATTGGTGGGATGCGAATCGGGGCACAATCTGGAAAGCCATCACATGTGACGTTAAGGGTAATAGATATTTTCGAGCAACGTGCAATAGTGGTGATAGTCAAGGTCCATCTCAAGCTCAAAACCAATGCCGATGTCCCATGACAAGTGATGGCAAGCCCAACGACCAAGTCCCCACATATTTTGACTATGTTCCACAATATTT…	DBLa0.1	3.19754e-137	4	0	3	3	0	0	0	0	3	0	0	0	0	0	2	0	0	0	0	0	0	0	0	0	0	1	0	0	0	0	0	0	0	0	0	0	0	0	0	0	0	0	0	0	0
#6_cluster_131	23	CGATATTGTAAGAGGAAAAGATCTTTTTCTTGGTCATAGCAAAGAAAAAGAAAAATTAGAACAAAATTTGAAAAATCTTTTCAAGCAATTATATGAAGAATTAAAGAAGCATGATACCACGATaaaaaaaaCTTACGAAAAATACGGTCCAGATTTTTATCAATTACGAGAAGATTGGTGGAATAATAATAGAATAATGGTATGGTATGCTATAACGTGTGGTGCAACAGATGGTGATAAATATTTTAGAGAATCATCTTCTGATAAAGGTGGCACTTATGAAAAATGCCGATGTTCTAGTCATAAGGTCCCCACATATTTTGACTATGTGCCGCAGTTTCTTCGC	DBLa0.4	0	5	0	4	4	0	0	0	0	4	0	0	0	0	0	4	0	0	0	0	0	0	0	0	0	0	4	0	0	0	0	0	0	0	0	0	0	0	0	0	0	0	0	0	0	0
#6_cluster_161	19	TGATATTATAAGAGGTAGAGATATGTTTCTTGGTAATAATGaaaaagatatgagagaaaaacagaaactgcaaaataatttaaaaaacatttttgggaaaaTTATGGAAAGTGATACAAATCTGAACACACAATCACTGGAAAAAGTTAGGGAATACTGGTGGGCGCTTAATAGAGAAGACGTATGGAAAGCATTAACATGTTCTGCGGATGGCAGTGAAGAATATTTCAAAAAACCAAGCAGCGATGAATACTCATTCTCAAATGGTCAATGCGGTCATAGGGATGAAAACGTCCCAACATATTTAGATTACGTCCCTCAATATTTACGT	DBLa1.5	0	29	23	0	0	23	0	0	0	0	3	0	19	6	14	2	0	0	0	0	0	3	8	8	0	0	2	0	0	2	0	8	0	0	7	1	0	6	2	0	0	0	7	1	0	0
#6_cluster_102	12	AGATATCGTACGCGGTAAAGATCTTTTCCTCGGTAATGATGAAGaaaaaagaaaaaaGAGATGAATTAGATGAGAATTTAAAAACAATTTTCAAGAAAATATATGAAGGATTGTCGACGACGAACGGCGCACAAGCTCGCTACGGAGGTGATGAAGCCAATAATTTTTTTCAATTACGAGAAGATTGGTGGTATGCGAATCGGCATACCGTGTGGAAAGCCATCACGTGCGGCACACATGAGGGTGATACATATTTTATGGAATCAAGAACAAATTCCTACAAATTTTCAGGTGATAAATGTGGTCATAATGATGATAACGTTCCAACGAACTTGGACTACGTCCCTCAATTTTTACGT	DBLa2	0	6	0	3	0	0	3	0	3	0	0	0	0	3	0	0	0	0	0	0	0	0	3	0	0	0	0	0	0	0	2	1	0	0	0	0	0	0	0	0	0	2	1	0	0	0
#6_cluster_123	12	AGATATTATAAGAGGAAAAGATCTTTATCTTGGTACCAATGaagagaaaaaaccattagaagaaaatttgaaaaaacttttcaaaaaCTTATATAAAGAATTGTCGAGGACGAATGGGGCGAAGGAGCTACAAGCTCGCTACGAAGGTGATGATAATTATTATCAATTACGAGAAGATTGGTGGGCACTGAATAGAAGATATGTATGGGATGCATTAACATGCGAAGCGCCAAATAATGCTAAATATTTTCGACAAACATGTTGTACAGGAACGGGAACACAAGGTCGATGCCGATGTGTGATTGGAGATGTCCCCACATATTTCGATTATGTGCCGAAGTATCTTCGC	DBLa0.6	0	32	0	24	22	0	0	0	0	23	0	0	0	0	0	20	0	4	0	0	0	0	0	0	0	0	17	1	0	0	0	0	0	0	0	0	0	0	0	0	0	0	0	0	0	0
					# hits in varDB	NTSA	NTSB	DBLa0	DBLa1	DBLa2	DBLpam1	CIDRa1	CIDRa2-6	CIDRb	CIDRg	CIDRd	DBLb	DBLg	DBLd	DBLe	DBLz	CIDRb	CIDRg	CIDRd	DBLb	DBLg	DBLd	DBLe	DBLz	CIDRb	CIDRg	CIDRd	DBLb	DBLg	DBLd	DBLe	DBLz	CIDRb	CIDRg	CIDRd	DBLb	DBLg	DBLd	DBLe	DBLz	CIDRb	CIDRg	CIDRd	DBLb
				Sample_total:	531	274	102	106	286	7	0	250	109	5	1	39	209	55	90	1	15	0	0	0	18	221	17	1	3	70	13	0	2	48	23	138	9	14	2	0	10	127	20	10	3	19	2	1	1
Interpreted Results				Position D1	Position D1	Position D2	Position D2	Position D2	Position D2	Position D3	Position D3	Position D3	Position D3	Position D3	Position D3	Position D4	Position D4	Position D4	Position D4	Position D4	Position D4	Position D4	Position D4	Position D5	Position D5	Position D5	Position D5	Position D5	Position D5	Position D5	Position D5	Position D6	Position D6	Position D6	Position D6	Position D6	Position D6	Position D6	Position D6	Domain 07	Domain 07	Domain 07	Domain 07	Domain 07	Domain 07	Domain 07	Domain 07	Domain 08	Domain 08
Patient ID_cluster #	Cluster size			NTSA	NTSB	DBLa0	DBLa1	DBLa2	DBLpam1	CIDRa1	CIDRa2-6	CIDRb	CIDRg	CIDRd	CIDRa1.2-3	DBLb	DBLg	DBLd	DBLe	DBLz	CIDRb	CIDRg	CIDRd	DBLb	DBLg	DBLd	DBLe	DBLz	CIDRb	CIDRg	CIDRd	DBLb	DBLg	DBLd	DBLe	DBLz	CIDRb	CIDRg	CIDRd	DBLb	DBLg	DBLd	DBLe	DBLz	CIDRb	CIDRg	CIDRd	DBLb	DBLg
#6_cluster_149	267			1	0	0	1	0	0	0		0	0	0		0	0	0	0	0	0	0	0	0	0	0	0	0	0	0	0	0	0	0	0	0	0	0	0	0	0	0	0	0	0	0	0	0	0
#6_cluster_67	228
#6_cluster_90	136			0	1	1	0	0	0	0	1	0	0	0		1	0	0	0	0	0	0	0	0	0	0	0	0	0	0	0	0	0	0	0	0	0	0	0	0	0	0	0	0	0	0	0	0	0
#6_cluster_142	113			0	1	1	0	0	0	0	1	0	0	0		0	0	1	0	0	0	0	0	0	0	0	0	0	0	0	0	0	0	0	0	0	0	0	0	0	0	0	0	0	0	0	0	0	0
#6_cluster_143	101			0	1	0	0	1	0	1		0	0	0		1	0	0	0	0	0	0	0	0	1	0	0	0	0	0	0	0	0	0	0	0	0	0	0	0	0	0	0	0	0	0	0	0	0
#6_cluster_40	96			0	1	1	0	0	0	0	1	0	0	0		0	0	1	0	0	0	0	0	0	0	0	0	0	0	0	0	0	0	0	0	0	0	0	0	0	0	0	0	0	0	0	0	0	0
#6_cluster_137	78
#6_cluster_66	74			0	0	1	0	0	0	0	1	0	0	0		1	0	0	0	0	0	0	0	0	0	1	0	0	0	0	0	0	0	0	0	0	1	0	0	0	0	0	0	0	0	0	0
#6_cluster_20	73
#6_cluster_28	72			0	1	1	0	0	0	0	1	0	0	0		0	0	1	0	0	0	0	0	0	0	0	0	0	1	0	0	0	0	0	0	0	0	0	0	0	0	0	0	0	0	0	0	0	0
#6_cluster_56	65
#6_cluster_53	60			0	0	1	0	0	0	0	1	0	0	0		0	0	1	0	0	0	0	0	0	0	0	0	0	1	0	0	0	0	0	0	0	0	0	0
#6_cluster_168	59			0	1	1	0	0	0	0	1	0	0	0		0	0	1	0	0	0	0	0	0	0	0	0	0	1	0	0	0	0	0	0	0	0	0	0	0	0	0	0	0	0	0	0	0	0
#6_cluster_19	57			0	1	1	0	0	0	0	1	0	0	0		0	0	1	0	0	0	0	0	0	0	0	0	0	1	0	0	0	0	0	0	0	0	0	0	0	0	0	0	0	0	0	0	0	0
#6_cluster_150	53			1	0	0	1	0	0	1		0	0	0		0	0	0	0	0	0	0	0	0	0	0	0	0	0	0	0	0	0	0	0	0	0	0	0	0	0	0	0	0	0	0	0	0	0
#6_cluster_138	53			1	0	0	1	0	0	0		0	0	0	1	1	0	0	0	0	0	0	0	0	1	0	0	0	0	0	0	0	0	0	1	0	0	0	0	0	1	0	0	0	0	0	0	0	0
#6_cluster_130	40			0	1	1	0	0	0	0	1	0	0	0		1	0	0	0	0	0	0	0	0	0	0	0	0	0	0	0	0	0	0	0	0	0	0	0	0	0	0	0	0	0	0	0	0	0
#6_cluster_68	37			0	1	1	0	0	0	0	1	0	0	0		0	0	1	0	0	0	0	0	0	0	0	0	0	0	0	0	0	0	0	0	0	0	0	0	0	0	0	0	0	0	0	0	0	0
#6_cluster_101	35			0	1	1	0	0	0	0	1	0	0	0		1	0	0	0	0	0	0	0	0	1	0	0	0	0	0	0	0	0	0	0	1	0	0	0	0	0	0	1	0	0	0	0	0	0
#6_cluster_105	30
#6_cluster_8	27			0	1	1	0	0	0	0	1	0	0	0		0	0	1	0	0	0	0	0	0	0	0	0	0	1	0	0	0	0	0	0	0	0	0	0	0	0	0	0	0	0	0	0	0	0
#6_cluster_131	23			0	1	1	0	0	0	0	1	0	0	0		0	0	1	0	0	0	0	0	0	0	0	0	0	1	0	0	0	0	0	0	0	0	0	0	0	0	0	0	0	0	0	0	0	0
#6_cluster_161	19			1	0	0	1	0	0	0		0	0	1		0	0	0	0	0	0	0	0	0	0	0	0	0	0	0	0	0	0	0	0	0	0	0	0	0	0	0	0	0	0	0	0	0	0
#6_cluster_102	12			0	1	0	0	1	0	1		0	0	0		1	0	0	0	0	0	0	0	0	1	0	0	0	0	0	0	0	0	0	0	0	0	0	0	0	0	0	0	0	0	0	0	0	0
#6_cluster_123	12			0	1	1	0	0	0	0	1	0	0	0		0	0	1	0	0	0	0	0	0	0	0	0	0	1	0	0	0	0	0	0	0	0	0	0	0	0	0	0	0	0	0	0	0	0
			Hit Rate:	0.215385	0.450549	0.462088	0.215385	0.0620879	0	0.0912088	0.462088	0	0	0.0104396	0.0291209	0.247802	0	0.305495	0	0	0	0	0	0	0.11044	0.0406593	0	0	0.17033	0	0	0	0	0	0.0291209	0.0192308	0.0406593	0	0	0	0.0291209	0	0.0192308	0	0	0	0	0	0
Suggested Composition
Patient ID_cluster #
#6_cluster_149	NTSA	DBLa1
#6_cluster_67
#6_cluster_90	NTSB	DBLa0.18	CIDRa6	DBLb5
#6_cluster_142	NTSB	DBLa0.18	CIDRa4	DBLd1
#6_cluster_143	NTSB3	DBLa2	CIDRa1.1	DBLb3	DBLg4
#6_cluster_40	NTSB	DBLa0.9	CIDRa2.1	DBLd1
#6_cluster_137
#6_cluster_66		DBLa0.5	CIDRa2.9	DBLb8	DBLd1	CIDRb1
#6_cluster_20
#6_cluster_28	NTSB3	DBLa0.5	CIDRa2.6	DBLd1	CIDRb
#6_cluster_56
#6_cluster_53		DBLa0.16	CIDRa3.4	DBLd1	CIDRb1
#6_cluster_168	NTSB3	DBLa0.10	CIDRa2.2	DBLd1	CIDRb
#6_cluster_19	NTSB3	DBLa0.1	CIDRa3.2	DBLd1	CIDRb5
#6_cluster_150	NTSA7	DBLa1.2	CIDRa1.7
#6_cluster_138	NTSA1	DBLa1.1	CIDRa1.2	DBLb11	DBLg1	DBLe1	DBLg1	DBLz	DBLe1	DBLg1
#6_cluster_130	NTSB	DBLa0.18	CIDRa6	DBLb5
#6_cluster_68	NTSB3	DBLa0.11	CIDRa2.4	DBLd1
#6_cluster_101	NTSB3	DBLa0.12	CIDRa2.1	DBLb5	DBLg	DBLz	DBLe
#6_cluster_105
#6_cluster_8	NTSB3	DBLa0.1	CIDRa3.2	DBLd1	CIDRb5
#6_cluster_131	NTSB7	DBLa0.4	CIDRa3.1	DBLd1	CIDRb1
#6_cluster_161	NTSA4	DBLa1.5	CIDRd1
#6_cluster_102	NTSB3	DBLa2	CIDRa1	DBLb12	DBLg
#6_cluster_123	NTSB3	DBLa0.6	CIDRa3.1	DBLd1	CIDRb1
[truncated: 177 more columns]

## Sheet: #7
	Total reads	Singletons
	3639	119
						Position D1	Position D1	Position D2	Position D2	Position D2	Position D2	Position D3	Position D3	Position D3	Position D3	Position D3	Position D4	Position D4	Position D4	Position D4	Position D4	Position D4	Position D4	Position D4	Position D5	Position D5	Position D5	Position D5	Position D5	Position D5	Position D5	Position D5	Position D6	Position D6	Position D6	Position D6	Position D6	Position D6	Position D6	Position D6	Domain 07	Domain 07	Domain 07	Domain 07	Domain 07	Domain 07	Domain 07	Domain 07	Domain 08
Patient ID_cluster #	Cluster size	Blast cluster sequence	Best Blast hit	E-value	# hits in varDB	NTSA	NTSB	DBLa0	DBLa1	DBLa2	DBLpam1	CIDRa1	CIDRa2-6	CIDRb	CIDRg	CIDRd	DBLb	DBLg	DBLd	DBLe	DBLz	CIDRb	CIDRg	CIDRd	DBLb	DBLg	DBLd	DBLe	DBLz	CIDRb	CIDRg	CIDRd	DBLb	DBLg	DBLd	DBLe	DBLz	CIDRb	CIDRg	CIDRd	DBLb	DBLg	DBLd	DBLe	DBLz	CIDRb	CIDRg	CIDRd	DBLb
#7_cluster_151	572	CGATATTATACGAGGAAAAGATCTTTATATTCGTAATAAACAAGAAAAAGATAGATTAGAAGAGAATTTAAGAAAGATTTTCAAGAAAATATATGAAGAATTGTCGAGGACGAGCGGCGCACAAACTTACTACGAAGATAAGGATACTGACaaaaaaaaaTTTTTATCGATTAAGAGAAGATTGGTGGACAGCGAATAGGCACACCGTGTGGGAAGCTATCACGTGCGACGCTCAGGGTTTTGACTATTTTCGAGCAACGTGCAATGGAAGAGAACGAACTAAAGGTGACTGCCGATGTGCTGCCGGAGATGTTCCCACATATTTTGACTACGTCCCTCAATATTTAAGA	DBLa0.6	2.20299e-143	1	0	0	0	0	0	1	0	0	0	1	0	0	0	0	0	0	0	0	0	0	0	0	0	0	0	0	0	0	0	0	0	0	0	0	0	0	0	0	0	0	0	0	0	0
#7_cluster_152	406	GAGATATTATAAGAGGAAAAGATTTGTATCGTGGTGTTAATGGAAATGATAAATTAGAAAACAAGTTAAAAGAAATTTTCAAGAAAATACATGGTGGATTGACGACGAAGAAAGGCGCAAAAGACCACTACAAAGATGGAAGTGGAGATTTCTTTCAATTACGAGAAGATTGGTGGAATAATAATAGAAAAATGGTATGGTACGCGATAACATGCGGCGCTGCGGGTGGTACATATTTTCGAGGAACATGTGGTAGTGGAAAAACTCCGACTCAAGGTAAATGCCGCTGTGAAGGCGCAAATGCCAACCAGGTCCCCACATATTTCGATTATGTGCCGCAGTATCTTCGC	DBLa0.9	0	15	0	10	10	0	0	0	0	10	0	0	0	0	0	10	0	0	0	0	0	0	0	0	0	0	9	1	0	0	1	0	1	0	0	0	0	0	0	0	0	1	0	0	0	0
#7_cluster_13	342	GAGACATTATAAGAGGAAAAGATTTGTATCTCGGTAATCCGCAAGaaaaaaaaCAAAGAGATCAATTAGAAAATAATTTGAAAACGATTTTTAAGAATATATATGAGAAATTATTGGAGGAAAACCAAAAGAATGAGAAGAAGGGGGAGATAGAAGCTCGCTACAAAGATGATACTGACAAAAACTATTACAAATTACGAGAAGATTGGTGGTATGCTAATCGAGAAACAGTATGGGAAGCCATCACATGTGAAGCAAAAACTGATGATAAATATTTTAGAAATACATGTTCTAATGATACATCACACACTAACGAAAAATGCCGGTGTGATAAGGACAAGGGCGGAAAGCCCGGCAAAAGTGAGACCGCCCAGGTTCCCACATATTTTGACTATGTGC…	DBLa0.11	2.38012e-163	1	0	1	1	0	0	0	0	1	0	0	0	0	0	1	0	0	0	0	0	0	0	0	0	0	0	1	0	0	0	0	0	0	0	0	0	0	0	0	0	0	0	0	0	0
#7_cluster_8	336	GAGATATTGTAAGAGGAAGAGATCTATTTTATGGTAATACACATGAAAGTGCACGAAGAGAAGACTTAGAAAAGAATTTGAAAACAATTTTCGGGAAAATACATGAGGACGTGATGAAGACGAGCGACAAGAATGGGAAGAATGGGAAGACGCTAAAAGATCGCTACAAAAATGATATTAAAAATTATTTTCAATTACGAGAAGATTGGTGGACAGTGAATAGGCACACCGTGTGGGAAGCCATGACCTGTCATGCTGGAGATAGTGATAAATATTTTCGACAAACATGTGGTTCAGGAGAATGGACTGATAAAAAATGCCGATGTGACGGCAAAAAGCCCGACAAGTCAAAGGCTGGCAACGGCGACGTAAATATCGATCCCCCAACCTATTTTGACT…	DBLa0.5	0	1	0	0	1	0	0	0	0	1	0	0	0	0	0	1	0	0	0	0	0	0	0	0	0	0	0	1	0	0	0	0	0	0	0	0	0	0	0	0	0	0	0	0	0	0
#7_cluster_139	248	TGACATTATACGAGGAAGAGATCTGTATCGTGGTGATAGTAGAACAGATAAATTAGAAAAGAATTTAAGAAAAATTTTCGCGAATATATATAAAGAATTGACGACGGAGAATGGTGTAAAAGAACGCTACAAAGATGATGCCaaaaaaaaaaaaaaTTTTATCAATTACGAGAAGATTGGTGGTATGCTAATAGACAAGAAGTATGGAAAGCAATCACATGTCATGCAGGAGAAAGTGATAAATAGTTTCGACAAACATGTGGTACTGGAAAAGATCGAACTGAGACTAAAAATAACTGCCAATGCGCTAACACAGATGTTCCCACATATTTTGACTATGTGCCGCAGTATCTTCGC	DBLa0.5	0	7	0	5	6	0	0	0	0	6	0	0	0	2	0	4	0	0	0	0	0	0	0	2	0	0	2	2	0	0	1	0	0	0	2	0	0	0	2	0	0	1	0	0	0	0
#7_cluster_75	241	GGAGACATCATACGAGGAAAGGATCTATTTCGCGGTTATGATGAAAAGGAAAAAAACCGAAGAGATCAATTAGAAAGTAAGTTGAAAGAAATTTTCAAGAAAATATATAAGGACGTGACGTCTAGCGGGAGGAATAGGCAGACGCTAAAAACACGCTACGATGGTGATACTACAGATTTTTTTCAATTGCGAGAAGATTGGTGGAATAATAATAGAAAAATGGTATGGATTGCTATGACGTGTGGTGCAGGAGAAAGTGATAAATATTTTCGACGAACATGTGGTGATGATGAAAAAACTGCAACTCAGGCTAGTCACAAATGCCGATGTCCTAGTCATAAGGTCCCCACATATTTTGACTACGTGCCGCAGTTTCTTCGC	DBLa0.9	0	6	0	5	6	0	0	0	0	6	0	0	0	0	0	6	0	0	0	0	0	0	0	0	0	0	5	0	0	0	0	0	0	0	0	0	0	0	0	0	0	0	0	0	0	0
#7_cluster_35	232	GTGATATCGTACGCGGTAAAGATCCATTTTATGGTAATCCACAAGAAAGTGCACAAAGAATAATATTACAAAAGAATTTaaaaaaaaTTTTCGGGAATATATATAAAGAATTGATAAAGAAAGGGAGTAATGTGAAGACGCTACAAGCTCGCTACAAAAAAGATGAAGATCCATATTATTATCAATTAAGAGAAGATTGGTGGACGGTTAACCGCGCCACAATCTGGGAAGCTATCACATGTAGCGACAGGCTAGGGGGTAATGCATATTTTCATGCAACGTGCATTGATGGACGAGGTGAATCTGTAGCTAATGACAAATGTCGATGTCCCAACACAAGTGATGGCAAGGCCAACGACCAGGTCCCCACATATTTTGACTATGTGCCGCAGTTTCTTC…	DBLa0.7	0	4	0	4	4	0	0	0	0	4	0	0	0	0	0	1	3	0	0	0	0	0	0	0	3	0	1	0	0	0	0	0	3	0	0	0	0	0	0	0	0	0	0	0	0	0
#7_cluster_148	207	AGACATTATAAGAGGAAAAGATCTGTATCTCGGTTATGATGAtaaagaaaaaaaacgaagagaaaaattagagaagaatttgaaagatattttcgggaaaaTACATGATGACGTGACGAAGGAGAAAAGATCTCGCTACAATGATGATACTCCAGATTTTTTTAAATTAAGAGAAGATTGGTGGTATGCTAATAGACAACAAGTATGGAAAGCTATTACGTGTAAGGCGGAGCAGAATAATAAATATTTTAGAGATGCATGTAGTGGAGGAACAAGTCCGATTCAAGGTGACTGCCGGTGTAAGGACGACCAGGTCCCCACATATTTCGATTATGTGCCGCAGTTTCTTCGCT	DBLa0.11	0	2	0	2	2	0	0	0	0	2	0	0	0	0	0	2	0	0	0	0	0	0	0	0	0	0	0	2	0	0	0	0	0	0	0	0	0	0	0	0	0	0	0	0	0	0
#7_cluster_86	193	GAGACATTATAAGAGGAAAAGATTTGTATCTCGGTAATCCACAAGAAAGTGCAAGAAGAGATAAATTAGAAAATAAGTTGAAAGAAATTTTCGGGGATATATATGAAGAATTGACGAACGGCGCAAAAGACCGCTACAATGGTGATAAAGAAAATTATTATGAATTAAGGGAATACTGGTGGGCACTTAATAGAAACGATGTATGGAAAGCTATCACATGTAACGCTTGGGGTAATAGATATTTTCGACAAACATGCAATGGAGGAAAATCTTCGACTCATCAAAAATGCCGGTGTGGCGACGGCAAGTCAAAGGCTTGCAACGGCGAAGTAAATATTGTCCCCACATATTTCGATTATGTGCCTCAATATTTGAGG	DBLa0.11	0	4	0	1	1	0	0	0	0	1	0	0	0	0	0	1	0	0	0	0	0	0	0	0	0	0	1	0	0	0	0	0	0	0	0	0	0	0	0	0	0	0	0	0	0	0
#7_cluster_123	130	AGATATTGTCAGAGGAAAAGATTTGTATCGTGGTGTTAATGGAAATGATAAATTAGAAAAGAATTTGAAAACAATTTTCGGGAAAATATATAGTGACGTGACGAGCGACAAGAATGGGAAGAATGGGGCGGCTCTAAAAACACGCTACGATGGTGATACCACAAATTATTATCAATTACGAGAAGATTGGTGGTATATTAATAGAAAAGAGGTATGGAAAGCTATAAGGTGTAGTGCGCCAACTGATGCTGATTATTTTATAAAATATACGTGTGCTGATGGGAAAAGTTCGGCTGAGCAAAAATGCCGCTGTATTAATTATGATGTTCCCACATATTTCGATTATGTGCCGCAGTATCTTCGC	DBLa0.9	3.74627e-156	1	0	0	0	0	0	0	0	0	0	0	0	0	0	0	0	0	0	0	0	0	0	0	0	0	0	0	0	0	0	0	0	0	0	0	0	0	0	0	0	0	0	0	0	0
#7_cluster_175	107	AGACATTATACGAGGAAAAGATCTTTTCCTTGGTGCTCCTAAtaaagagaaaataaaattagaagaaaatctgaaaaaaaaTATTTGATAACATTAAGAATGAAAATGCAGAACTTAGTAAATTATCACTTGAAAAAGTTAGGGAATATTGGTGGGCAATTCATAGAAAAGAGCTATGGGAAGCATTAACATGCAGTGCACCAAAAGGTGCTAATTATTTTGTATATAAATTAGATAGACCTAAATTTTCTAGTGATAGGTGTGGACATAATTATAACGGTGATCCTCTTACGAATTTAGATTATGTTCCTCAATATTTACGT	DBLa1.4	2.51308e-177	200	175	0	0	179	0	0	179	0	0	0	0	174	0	0	0	0	0	0	0	0	162	0	0	0	0	0	0	0	0	0	153	0	0	0	0	0	131	0	0	0	0	0	0	0
#7_cluster_19	95	GAGACATTATACGAGGAAAAGATCCATTTTATGGTAATCCAGAAGAAATAAAACAAAGACAACAATTAGACAAGAAGTTGAAAGATATTTTCGGGGATATATATAAGGACGTGATGAAGACGAATGGGAAGACGCTAAAAGATCGCTACCAAAATGACGGTCCAGATTATTTTCAATTACGAGAAGATTGGTGGACTGCGAATCGAGAAACAGTATGGAAAGCTATCACGTGCAACGACGACAACAAGCTAGCAAGTGCTTCATATTTTCGAGGAACATGTGGTGGTGATGAAAACACTGCAACTGAGGCTAAAAACAAATGCCGGTGTGAGAAGAAAAGGGGAACAAGTGGCGACGGAGATGTAAATATTGTTCCCACATATTTCGATTATGTGCCGC…	DBLa0.5	0	7	0	1	5	0	0	0	0	5	0	0	0	0	0	5	0	0	0	0	0	0	0	0	0	0	5	0	0	0	0	0	0	0	0	0	0	0	0	0	0	0	0	0	0	0
#7_cluster_55	79	TGATATTATCAGAGGAAAAGATCTGTATCGTGGTAATaaaaaaaaaattaaaacagaaacagaaagagataaattagacaagaattttaaaaaaTATTTCCAGCAAATACATGACAAATTGGAGCAAGCGGCAAAAGAACACTACAAAGGTGATGCCGACAATAATTATTTTCAATTACGAGAAGATTGGTGGACGGCGAATCGCTCCACAGTATGGAAAGCATTAACATGTGACCACAGGCTAGGGGGTTATTCATATTTTCGACCAACGTGCAATGGAGAACAACGAACTAAAGGTTACTGCCGGTGTGGCGACGACAAGCCAGATGACGACAAGGCAAATGTCGATCCTCCTACATATTTCGATTATGTGCCGCAGTATCTTCGCT	DBLa0.1	0	2	0	1	1	0	0	0	0	1	0	0	0	0	0	1	0	0	0	0	0	0	0	0	0	0	0	1	0	0	0	0	0	0	0	0	0	0	0	0	0	0	0	0	0	0
#7_cluster_111	71	AGACATTATACGAGGAAGAGATTTGTATGGAGGTAGTaaaaaagaaaaagatcaaagaaaaaaattagatgataagttgaaagaaattttcgaaaaCATTAAGAAAGAGAATAATTCAAAACTAACTAACCTTAATGATGACCAAATTAGGGAAGATTGGTGGGAAGCTAACAGAAAACAAATATGGCAAGCCATGACATGTAGCGAGAAGCTATCAAATGCTTCATATTTTCGAGCAACGTGCATTGATGGACGAGGTGGAGCCCAAGCTAATAACTACTGCCGGTGTAACGGCGACAAACCAGATGACGACAAGGAAAATATCGATCCCCCAACCTATTTCGACTATGTGCCGCAGTTTCTTCGC	DBLa0.20	0	8	0	3	7	0	0	0	0	7	0	0	0	0	0	5	0	0	0	0	0	0	0	0	0	0	4	1	0	0	0	0	1	0	0	0	0	0	1	0	0	0	0	0	0	0
#7_cluster_20	66	AGATATTGTACGAGGAAGAGATTTATATCTTGGTAATCCAGAAGAAATAAAACAAAGAAAACAATTAGAAAATAATTTGAAAGAAATTTTCACGCAAATATATAATGACGTGACGTCGACGAGAGAGAATAAAGGGAAGACGAATGGCGCAGAAGCACGCTACGGAAGTGATCAAGATTTTTTAAAATTACGTGAAGATTGGTGGACTGCAAATCGCGCCAAAGTATGGGAAGCTATCACGTGCAACGACGACAACAAGCTAGCAAGTGCTTCATATTTTCGAGAAACGTGCAATGATACTGGACGAGGTGGAGCCCAAGCTAATAACAAATGCCGCTGTAAGGACGAAAAGGGCAAAAATACCGACCAAGTCCCCACATATTTCGATTATGTGCCACA…	DBLa0.16	0	3	0	0	3	0	0	0	0	3	0	0	0	0	0	3	0	0	0	0	0	0	0	0	0	0	3	0	0	0	0	0	0	0	0	0	0	0	0	0	0	0	0	0	0	0
#7_cluster_4	31	TGATATCGTACGCGGCAAAGATCTATTTCGTGGTTATGATGATgaagaaaaaaaccgaagaaaaaaattagaagataatttgagaaaaaTTTTCACGCAAATATATAAGGACGTGACGTCGACGAGCGGGAATAAAGGGAAGACGAATGGAGAGGCAGCAAAAGCTCGCTACAAAGATACTGATAATTATTATGAATTAAGGGAAGATTGGTGGGAACTCAATAGAGAAACAGTATGGAAAGCTATCACGTGCAGCGCGGACACGGGTAATAAATATTTTCGACCAACGTGCGATAGTAGTAATAGACAAGGTCCATCTCAAGCTAATAACTACTGTCGGTGTAACGGCGACCAGCCAGGTCAGGACAAGACCAATACCGATCCTCCTACATATTTTGA…	DBLa0.19	0	3	0	3	3	0	0	0	0	3	0	0	0	0	0	1	0	0	0	0	0	0	0	0	0	0	0	1	0	0	0	0	0	0	0	0	0	0	0	0	0	0	0	0	0	0
#7_cluster_47	12	AGATATTGTAAGAGGAAGAGATCTGTATCTCGGTTATGATGAtgaagaaaaaaaacaaagaaaacaattagaaaagaaattgaaagaaattttcgcgaaaaTACATAGTGGATTGACGAATAGCGCGTTACAAGCTCGCTACAATGATGATAAAAAGAATAATTTTTTTCAATTGAGAGAAGATTGGTGGAATGCCAATAGACAACAAGTTTGGAAAGCTATTACATGTGATGCGCACGGTACATACTTTCGTCCAACATGTAGTGATCGTAATGGAGGTTGTTCTCAAGCTAGAAAGAAATGCCGGTGTGAAGGCGCAAATGCCGGCAAGGGAAGTGGCGACGTAAATATTGTCCCCACATATTTTGACTACGTGCCGCAGTATCTTCGC	DBLa0.11	2.38012e-163	1	0	1	1	0	0	0	0	1	0	0	0	0	0	1	0	0	0	0	0	0	0	0	0	0	0	1	0	0	0	0	0	0	0	0	0	0	0	0	0	0	0	0	0	0
					# hits in varDB	NTSA	NTSB	DBLa0	DBLa1	DBLa2	DBLpam1	CIDRa1	CIDRa2-6	CIDRb	CIDRg	CIDRd	DBLb	DBLg	DBLd	DBLe	DBLz	CIDRb	CIDRg	CIDRd	DBLb	DBLg	DBLd	DBLe	DBLz	CIDRb	CIDRg	CIDRd	DBLb	DBLg	DBLd	DBLe	DBLz	CIDRb	CIDRg	CIDRd	DBLb	DBLg	DBLd	DBLe	DBLz	CIDRb	CIDRg	CIDRd	DBLb
				Sample_total:	266	175	37	51	179	0	1	179	51	0	1	0	176	0	42	3	0	0	0	0	0	162	2	3	0	30	11	0	0	2	0	158	0	2	0	0	0	134	0	0	2	0	0	0	0
Interpreted Results				Position D1	Position D1	Position D2	Position D2	Position D2	Position D2	Position D3	Position D3	Position D3	Position D3	Position D3	Position D3	Position D4	Position D4	Position D4	Position D4	Position D4	Position D4	Position D4	Position D4	Position D5	Position D5	Position D5	Position D5	Position D5	Position D5	Position D5	Position D5	Position D6	Position D6	Position D6	Position D6	Position D6	Position D6	Position D6	Position D6	Domain 07	Domain 07	Domain 07	Domain 07	Domain 07	Domain 07	Domain 07	Domain 07	Domain 08	Domain 08
Patient ID_cluster #	Cluster size			NTSA	NTSB	DBLa0	DBLa1	DBLa2	DBLpam1	CIDRa1	CIDRa2-6	CIDRb	CIDRg	CIDRd	CIDRa1.2-3	DBLb	DBLg	DBLd	DBLe	DBLz	CIDRb	CIDRg	CIDRd	DBLb	DBLg	DBLd	DBLe	DBLz	CIDRb	CIDRg	CIDRd	DBLb	DBLg	DBLd	DBLe	DBLz	CIDRb	CIDRg	CIDRd	DBLb	DBLg	DBLd	DBLe	DBLz	CIDRb	CIDRg	CIDRd	DBLb	DBLg
#7_cluster_151	572			0	0	0	0	0	0	0	0	0	0	0		0	0	0	0	0	0	0	0	0	0	0	0	0	0	0	0
#7_cluster_152	406			0	1	1	0	0	0	0	1	0	0	0		0	0	1	0	0	0	0	0	0	0	0	0	0	1	0	0	0	0	0	0	0	0	0	0	0	0	0	0	0	0	0	0	0	0
#7_cluster_13	342			0	1	1	0	0	0	0	1	0	0	0		0	0	1	0	0	0	0	0	0	0	0	0	0	0	1	0	0	0	0	0	0	0	0	0	0	0	0	0	0	0	0	0	0	0
#7_cluster_8	336			0	0	1	0	0	0	0	1	0	0	0		0	0	1	0	0	0	0	0	0	0	0	0	0	0	1	0	0	0	0	0	0	0	0	0
#7_cluster_139	248			0	1	1	0	0	0	0	1	0	0	0		0	0	0	0	0	0	0	0	0	0	0	0	0	0	0	0	0	0	0	0	0	0	0	0	0	0	0	0	0	0	0	0	0	0
#7_cluster_75	241			0	1	1	0	0	0	0	1	0	0	0		0	0	1	0	0	0	0	0	0	0	0	0	0	1	0	0	0	0	0	0	0	0	0	0	0	0	0	0	0	0	0	0	0	0
#7_cluster_35	232			0	1	1	0	0	0	0	1	0	0	0		0	0	0	1	0	0	0	0	0	0	0	1	0	0	0	0	0	0	0	1	0	0	0	0	0	0	0	0	0	0	0	0	0	0
#7_cluster_148	207			0	1	1	0	0	0	0	1	0	0	0		0	0	1	0	0	0	0	0	0	0	0	0	0	0	1	0	0	0	0	0	0	0	0	0	0	0	0	0	0	0	0	0	0	0
#7_cluster_86	193			0	1	1	0	0	0	0	1	0	0	0		0	0	1	0	0	0	0	0	0	0	0	0	0	1	0	0	0	0	0	0	0	0	0	0	0	0	0	0	0	0	0	0	0	0
#7_cluster_123	130
#7_cluster_175	107			1	0	0	1	0	0	0		0	0	0	1	1	0	0	0	0	0	0	0	0	1	0	0	0	0	0	0	0	0	0	1	0	0	0	0	0	1	0	0	0	0	0	0	0	0
#7_cluster_19	95			0	1	1	0	0	0	0	1	0	0	0		0	0	1	0	0	0	0	0	0	0	0	0	0	1	0	0	0	0	0	0	0	0	0	0	0	0	0	0	0	0	0	0	0	0
#7_cluster_55	79			0	1	1	0	0	0	0	1	0	0	0		0	0	1	0	0	0	0	0	0	0	0	0	0	0	1	0	0	0	0	0	0	0	0	0	0	0	0	0	0	0	0	0	0	0
#7_cluster_111	71			0	1	1	0	0	0	0	1	0	0	0		0	0	1	0	0	0	0	0	0	0	0	0	0	1	0	0	0	0	0	1	0	0	0	0	0	1	0	0	0	0	0	0	0	0
#7_cluster_20	66			0	0	1	0	0	0	0	1	0	0	0		0	0	1	0	0	0	0	0	0	0	0	0	0	1	0	0	0	0	0	0	0	0	0	0
#7_cluster_4	31			0	1	1	0	0	0	0	1	0	0	0		0	0	1	0	0	0	0	0	0	0	0	0	0	0	1	0	0	0	0	0	0	0	0	0	0	0	0	0	0	0	0	0	0	0
#7_cluster_118	17			0	0	1	0	0	0	0	1	0	0	0		0	0	1	0	0	0	0	0	0	0	0	0	0	1	0	0	0	0	0	0	0	0	0	0
#7_cluster_47	12			0	1	1	0	0	0	0	1	0	0	0		0	0	1	0	0	0	0	0	0	0	0	0	0	0	1	0	0	0	0	0	0	0	0	0	0	0	0	0	0	0	0	0	0	0
			Hit Rate:	0.03161	0.637223	0.761004	0.03161	0	0	0	0.761004	0	0	0	0.03161	0.03161	0	0.619202	0.0685377	0	0	0	0	0	0.03161	0	0.0685377	0	0.321713	0.297489	0	0	0	0	0.121123	0	0	0	0	0	0.0525849	0	0	0	0	0	0	0	0
Suggested Composition
Patient ID_cluster #
#7_cluster_151
#7_cluster_152	NTSB3	DBLa0.9	CIDRa2.2	DBLd1	CIDRb
#7_cluster_13	NTSB3	DBLa0.11	CIDRa2.4	DBLd1	CIDRg11
#7_cluster_8		DBLa0.5	CIDRa2.6	DBLd1	CIDRg4
#7_cluster_139	NTSB3	DBLa0	CIDRa2.3
#7_cluster_75	NTSB3	DBLa0.9	CIDRa2.1	DBLd1	CIDRb
#7_cluster_35	NTSB3	DBLa0.8	CIDRa2.2	DBLe2	DBLe2	DBLe2
#7_cluster_148	NTSB3	DBLa0.11	CIDRa2.4	DBLd1	CIDRg10
#7_cluster_86	NTSB3	DBLa0.11	CIDRa2.4	DBLd1	CIDRb1
#7_cluster_123
#7_cluster_175	NTSA1	DBLa1.4	CIDRa1.3	DBLb1	DBLg15	DBLe1	DBLg15	DBLz1	DBLe1
#7_cluster_19	NTSB3	DBLa0.5	CIDRa2.9	DBLd1	CIDRb1
#7_cluster_55	NTSB3	DBLa0.1	CIDRa3.1	DBLd1	CIDRg4
#7_cluster_111	NTSB3	DBLa0.20	CIDRa3.2	DBLd1	CIDRb	DBLe13	DBLg2
#7_cluster_20		DBLa0	CIDRa3.4	DBLd1	CIDRb1
#7_cluster_4	NTSB3	DBLa0.19	CIDRa2.6	DBLd1	CIDRg4
#7_cluster_118		DBLa0.9	CIDRa2.1	DBLd1	CIDRb6
#7_cluster_47	NTSB3	DBLa0.11	CIDRa2.4	DBLd1	CIDRg11
[truncated: 177 more columns]

## Sheet: #9
	Total reads	Singletons
	1547	64
						Position D1	Position D1	Position D2	Position D2	Position D2	Position D2	Position D3	Position D3	Position D3	Position D3	Position D3	Position D4	Position D4	Position D4	Position D4	Position D4	Position D4	Position D4	Position D4	Position D5	Position D5	Position D5	Position D5	Position D5	Position D5	Position D5	Position D5	Position D6	Position D6	Position D6	Position D6	Position D6	Position D6	Position D6	Position D6	Domain 07	Domain 07	Domain 07	Domain 07	Domain 07	Domain 07	Domain 07	Domain 07	Domain 08
Patient ID_cluster #	Cluster size	Blast cluster sequence	Best Blast hit	E-value	# hits in varDB	NTSA	NTSB	DBLa0	DBLa1	DBLa2	DBLpam1	CIDRa1	CIDRa2-6	CIDRb	CIDRg	CIDRd	DBLb	DBLg	DBLd	DBLe	DBLz	CIDRb	CIDRg	CIDRd	DBLb	DBLg	DBLd	DBLe	DBLz	CIDRb	CIDRg	CIDRd	DBLb	DBLg	DBLd	DBLe	DBLz	CIDRb	CIDRg	CIDRd	DBLb	DBLg	DBLd	DBLe	DBLz	CIDRb	CIDRg	CIDRd	DBLb
#9_cluster_74	292	GGACATTGTCAGAGGAAAAGATCTTTTCCTTGGTCATCAACaaagaaaaaaaagaattagaagaaaatttgaaaaaaattttcaagaaaaTACATGGTGGATTGACAGATAGTGGTGCAAAAAATCACTACCAAGATGATAATGATGGAAATTTTTATCAATTAAGAGAAGATTGGTGGAATAATAATAGAATAATGGTATGGCGCGCGATAACATGCGGCGCTGCGGGTGGTAAATATTTTAGAAAAACATGTTCTAATGACACATCAGACACTAACGAAAAATGCCGATGTACCATTCATGGTGTTCCTACATATTTCGATTATGTGCCGCAGTATCTTCGG	DBLa0.9	6.33117e-109	2	0	0	0	0	0	0	0	0	0	0	0	0	0	0	0	0	0	0	0	0	0	0	0	0	0	0	0	0	0	0	0	0	0	0	0	0	0	0	0	0	0	0	0	0
#9_cluster_37	279	GTGATATCGTACGCGGCAAAGATCCATTTTATGGTAATCCAcaagaaaaagaaaaaagagaagacttagaaaagaatttgaaaaCAATTTTCAAGCAAATACATGAGGGATTGTCGAGGACGAATGGGAAGAATGGGGAGATAGAAACTCGCTACAAAGATGACGGTGATAAATTTTTTCAATTAAGGGAAGATTGGTGGACTGCAAATCGGCACACCGTGTGGAAAGCTATCACGTGCAGCGCTGGGAGTGGTAAATATTTTCGACGAACATGTGTTGGGGGAAATGAAACTGAAAGTAACTGCCGCTGTGACGACAAGCCAAATACCAATCCCCCAACCTATTTCGATTATGTGCCGCAGTTTCTTCGC	DBLa0.9	1.08783e-116	3	0	2	2	0	0	0	0	2	0	0	0	0	2	0	0	0	0	0	0	0	0	1	0	0	0	0	0	0	0	0	0	0	0	1	0	0	0	0	1	0	0	0	0	0
#9_cluster_23	264	TGATATCATACGAGGAAGAGATCTGTATCGTGGTAATGATAaagaaaatgataaattagaaaggaaattaaaaaaaatttttcaagaaaatACATAGTGGATTGACGACGAAGAAGAGGAAGACGAAGACCTCGGCAAAAGAATACTACGAAGATAAGGATACTGACAAAAACTATTATAAATTAAGAGAAGATTGGTGGGACGCAAATCGCGCCACAGTATGGAAAGCTATCACGTGCGACGTTCATGGTTCTGACTATTTTCGACCAACATGTGGTGGTGATAAAGAAAACACTGCAACTCGGGTTAAAGACAAATGCCGGTGTGGCAACGACCAAGTCCCCACATATTTCGACTATGTGCCACAGTATCTTCGC	DBLa0.15	0	6	0	4	4	0	0	0	0	4	0	0	0	0	0	3	0	0	0	0	0	0	0	0	0	0	2	0	0	0	0	0	0	0	0	0	0	0	0	0	0	0	0	0	0	0
#9_cluster_51	83	TGATATCGTACGCGGCAAAGATTTGTATCTCGGTGGTAATACCAAAGaaaaaaaaaCAAAGAGATGACTTAGAAAAGAATTTACAAAACATTTTCGCGAAAATATATGGAGAATTGATAAAGAAAAAGACGGAAGCAAAAGAACACTACGAAGATGGCGCTCCAGAGTTTTATAAATTAAGAGAAGATTGGTGGGCACTTAATAGACAAGATGTATGGAAAGCATTAACATGTGATGCAGGACAAGGTGCTCAATATGTTGGACTTACATGTTCTGAAGGACGAAGTTCGGCTCATCAAAAATGCACATGCGCTAATGGAGATGTCCCCACATATTTTGATTATGTGCCGCAGTTTCTTCGC	DBLa0.6	0	3	0	2	2	0	0	0	0	2	0	0	0	0	0	2	0	0	0	0	0	0	0	0	0	0	2	0	0	0	0	0	0	0	0	0	0	0	0	0	0	0	0	0	0	0
#9_cluster_14	73	TGATATCGTACGCGGCAAAGATCTATTTCGTGGTAATAATGAAGaaaaaaaaaCAAAGAAAAGAATTAGACAAGAAGTTGAAAGAAATTTTCCAACAAATACATAGTGAAGTGACGTCTAGCGGGAGTAATTGGAAGGCTCTAAAAACACGCTACAAAGATGATGCCAAAAAATATTATTCTAAATTACGAGAAGATTGGTGGAACGCGAATCGGCACACCGTGTGGGAAGCTATCACGTGTGAAGTTAAGAGTGGTTCTGACTATTTTCGACCAACATGTGGTAATAGTGGAAGTCCATCTATGGCTAGAGACAAATGCCGGTGTGGCAACGGCGACGTAAGTATTGTCCCCACATATTTTGACTACGTGCCGCAGTATCTTCGG	DBLa0.5	0	3	0	2	2	0	0	0	0	2	0	0	0	0	0	2	0	0	0	0	0	0	0	0	0	0	1	0	0	0	0	0	1	0	0	0	0	0	0	0	0	0	0	0	0	0
#9_cluster_70	61	TGATATTATACGAGGAAAAGATCTTTATATTCGTAATAAACaagaaaaagatagattagaaaagaatttgaaaaaaattttccagaaaaTATATGAAGGATTGACGACGACGAACGGCGCACAAGAACACTACCAAGATGAAAATGGTGGAAATTTTTTTAAATTACGAGAAGATTGGTGGAATATCAATAGaaaaaaaaGTATGGGATGCTATCACATGTAACGCTTGGGGTAATACATATTTTCGAGGAACATGTTCTAATGACACAGCTTTGGCTAAAAATAACTGCCAATGTATTGACCAAACGGTTCCCACTAATTTTGATTATGTGCCGCAGTATCTTCGC	DBLa0.12	0	2	0	1	1	0	0	0	0	1	0	0	0	0	0	1	0	0	0	0	0	0	0	0	0	0	1	0	0	0	0	0	0	0	0	0	0	0	0	0	0	0	0	0	0	0
#9_cluster_0	48	GTGACATTATACGAGGAAAAGATCTTTATCTCGGTGATAATATaaaagatagagaacaaaaacaaaaattacaagaaaatttgaaaacaattttcgggaaaaTATATGATGAAGTGACGAGAGGGAAGACGAATGGGAAGAAGGAGGAGATAGAAACTCGCTACAAAAAAGATGATGAGGATGGAAATTTTTTTCAATTACGAGAAGATTGGTGGGCACTTAACAGAGATCAAGTATGGCAAGCCATCACATGCAAAGCGAACGGTACATACTTTCGTCCAACATGCGGTGATAGTGATAGTCCATCTCAAGCTCAAAAACAATGCCGGTGTGACGACGACAAGCCAAAGAGCGCAAAGCCCGGCAAGGCAAATGACAACGTAAATATTGTTCCCACCT…	DBLa0.11	0	6	0	4	4	0	0	0	0	4	0	0	0	0	0	4	0	0	0	0	0	0	0	0	0	0	1	3	0	0	0	0	0	1	0	0	0	0	0	0	1	0	0	0	0	0
#9_cluster_54	45	GAGACATAATACGAGGAAGAGATTTGTATGGTGGTAATAATAAGAGAAGACAACAATTAGAAGAGAATTTAAGAAAAATTTTCGCGAATATATATGAAGAATTGTCGAGGACGCCGACGAAGAATGGGCAGAAGTCTGCAAAAGGACACTACGGAAGTGATGCTCCAAATTTTTATAAATTACGAGAAGATAGGTGGAATAATAATAGAATAATGGTATGGTACGCGATAACGTGCGGCGTTAAGGGTAATAAATATTTTCGACAAACATGTGGTTCAGGAGAATGGACTAAAGACAATTGCCGATGTACCATTCATGGTGTTCCCACATATTTTGACTACGTGCCGCAGTATCTTCGC	DBLa0.9	1.08783e-116	3	0	2	2	0	0	0	0	2	0	0	0	0	2	0	0	0	0	0	0	0	0	1	0	0	0	0	0	0	0	0	0	0	0	1	0	0	0	0	1	0	0	0	0	0
#9_cluster_82	43	TGATATTACACGAGGAAAAGATCTTTATCGTGGAAATAAACAAGAAAAAGATGCATTACAAGAGCAATTAAAGAAATATTTCAAGGAGCTTCATAATCATTTAAAGCAGCAAGAAAAAAATTACTATGAAGATAGAAATGGAAATTATTATCTATTAAGAGAAGATTGGTGGGCACTTAATAGAAAAGATGTTTGGAAAGCATTAACATGTGAAGCATACGGTACATATTTTCGACACACATGTAATGGACAAAATCCAACTCAGACTGAAGATAACTGCCAATGTATCAATGGTGATGTCCCCACATATTTTGACTACGTCCCTCAACATTTACGT	DBLa0.6	7.32581e-173	1	0	1	1	0	0	0	0	1	0	0	0	0	0	0	0	0	0	0	0	0	0	0	0	0	0	0	0	0	0	0	0	0	0	0	0	0	0	0	0	0	0	0	0	0
#9_cluster_9	38	TGATATCGTACGCGGCAAAGATCTTTTCCTTGGTAATCCAGAAGAAATAAAACAAAGACAACAATTAGACAAGAAGTTGAAAGATATTTTCACGCAAATATATAATGAGGTGACGAATGGGAAGAAGTCGGAGCTACAAGCTCGCTACGATGGTGACGGTCCAAATTTTTTTAAATTACGAGAAGATTGGTGGAACGCGAATCGGCACACCGTGTGGAAAGCCATCACGTGCGGCACACATAAGGGTGATACATATTTTCGAACAACGTGCATTGATCTTAATGGAAGTGGAGCCCAAGCTAATAACTACTGCCGGTGTAACGGCGACCAGCCAAATGACGACAAGCCAAATATCGATCCCCCAACCTATTTAGATTATGTGCCGCAGTTTCTTCGC	DBLa0.6	0	3	0	2	2	0	0	0	0	2	0	0	0	0	0	2	0	0	0	0	0	0	0	0	0	0	2	0	0	0	0	0	0	0	0	0	0	0	0	0	0	0	0	0	0	0
#9_cluster_16	31	AGATATTATACGAGGAAAAGATTTGTATCGTCGAGATAAAGGAAAAAGAGATAAATTAGAAGATAAGTTGAAAGAGGTTTTTGGGAAAATATATAATGAGTTGACGTCGACGAATGGTGTAAAATCTCGCTACAATGGTGATGAAGCCAATAATTATTATCAATTACGAGAAGATTGGTGGGCACTTAACAGAGACCAAGTCTGGAAAGCCATCACGTGCGGCGCGGACGCTGGTAATAAATATTTTCGACAAACATGTGGTAGTGGAAAAACTGCAATTCGGACTCCTAGTCAATGCCGGTGTGGCGACGGCAAAAAGACCGGCACAAATGAGACCGACCAGGTCCCCACATATTTTGACTACGTGCCACAGTTTCTTCGC	DBLa0.1	0	3	0	1	1	0	0	0	0	1	0	0	0	0	0	1	0	0	0	0	0	0	0	0	0	0	0	1	0	0	0	0	0	0	0	0	0	0	0	0	0	0	0	0	0	0
#9_cluster_80	30	GTGATATTGTAAGAGGAATAGATATGTTTAAACCAAATGTCCATGACAAAGTAGAAAAGGGTCTCCGAGAGGTTTTCAAGAAAATACATGATGAAATGGAAGGTGAGGTAAAAAATGATTACAATCCTGATGGATCTGGAAATTATTATAAATTAAGAGAAGCATGGTGGGATGTGAATAGAAATAAAGTATGGCAAGCCATAACCTGTGGCGCACTACCTAAATCTGCATATTTCTTGCAATCAGAAGATAATAAACAATTATTTTTATATCCTAAATGCGGCCATAATAATAAGAATGATCTTCCTACCAATTTAGATTATGTTCCTCAATATTTACGT	DBLa1.1	0	200	152	0	1	157	0	0	157	1	0	0	0	156	0	0	0	0	0	0	0	0	147	0	1	0	0	0	0	0	0	0	132	0	0	0	0	0	113	0	1	0	0	0	0	0
#9_cluster_66	21	GGATATAATAAAAGGAAAAGATCTTTATCTTGGTAATAAAAAGCAATAtgaaactgaaagggaaaaggaaatattgcaaaaaaatttaaaaagtattttcaaaaaaaTATATGGAGACTTGAGCGAATCGGCAAAAAAAGCACTACGGAGATGATGAAAATTATTATCAACTAAGGGAAGATTGGTGGAATGCTAATAGACAACAAATATGGAAAGCTATAACATGTGGTGCTCCATCAGATGCTCAATATTTTAGAAGTACATGTTCATCTAAAGGTGGGAATTATGAAAAATGCCATTGTATTGGTGGAGATGTTCTTACAAATTTCGATTATGTGCCTCAATATTTACGT	DBLa0.15	0	1	0	0	1	0	0	0	0	1	0	0	0	0	0	0	0	0	0	0	0	0	0	0	0	0	0	0	0	0	0	0	0	0	0	0	0	0	0	0	0	0	0	0	0	0
#9_cluster_71	16	AGATATTGTCAGAGGAAAAGATCTTTTTCTTGGGCATAAACAAAGAAAAAATGAATTAGAAGCAAGATTACAAAAAATTTTCGGGAAAATACATGAAGGATTGTCGAAGGCGAATGGTGTAAAAGATGGCTACAATGATGATGCTCCATATTATTATAAATTACGAGAAGATTGGTGGGATGCCAATAGACTTGATGTATGGAAAGCCATCACATGTGATGCACCAGAAGATGCTAAATATAATGTAATTGCATCAGATGGAACTAGAAGAGAATCTAACTATAAAAAATGTAGAGACTTTGCAGATGTTACTACCAATTTCGATTATGTGCCACAATATTTAAGA	DBLa0.18	0	17	0	14	14	0	0	0	0	14	0	0	0	4	0	9	0	0	0	0	0	0	0	4	0	0	5	2	0	0	0	0	0	1	3	1	0	0	0	0	1	0	0	0	0	0
#9_cluster_76	12	GAGACATTATACGAGGAAAAGATATGTATGTTGTAAATAAAGGagaaaaaagaagattggaagataatttaaaaaaaattttcaagaaaaTACATAATAATTTGCAGGATACTGAAGCACAAAATCATTACAACGGTGATAAAAACAATAATTATTTTCAATTACGAGAAGATTGGTGGAACGCTAATAGACAAGAAGTATGGAAAGCAATTACATGTGATGCTGGGAATGCTCAATATGTTGGACTTACATGTTCTGAAGGAGGAAGTTCGGCTCATGAAAAATGCACATGTGCTAACGGAGATGTACCTACATATTTTGACTATGTGCCACAATATTTGAGA	DBLa0.6	0	11	0	9	9	0	0	0	0	9	0	0	0	8	0	0	1	0	0	0	0	0	7	0	0	0	0	0	0	0	0	0	0	4	0	0	0	0	0	0	1	0	0	0	0	0
#9_cluster_68	11	CGATATTATCAGAGGTAAAGATCTATTTCTTGGTGGCCCTGATCAAGAAAAAAAGAAATTAGAAGAGAACTTGAGAAACATTTTCAAGAATATACATGATCATTTGACGGATGCAAAAGCAAAGTCGTACTACAAAAATGATAATGACCGAAATTATTTCAAATTAAGAAACGATTGGTGGGAACTAAATAGACAACAAGTATGGAATGCTATAACGTGTGGTGCTCCATCAGATGCTCAATATTTTAGAAATACATGTTCTTCCATTAAGGGTGGGCATTATAAAAATTGCCATTGTATTGGTGGTGATGTTCTTACAAATTTCGATTACGTCCCTCAATATTTAAGA	DBLa0.4	0	200	0	154	155	0	0	0	0	152	0	0	0	145	1	0	1	3	0	0	0	0	127	1	0	0	0	0	0	0	0	112	0	0	1	0	0	0	0	0	0	0	69	38	0	0
					# hits in varDB	NTSA	NTSB	DBLa0	DBLa1	DBLa2	DBLpam1	CIDRa1	CIDRa2-6	CIDRb	CIDRg	CIDRd	DBLb	DBLg	DBLd	DBLe	DBLz	CIDRb	CIDRg	CIDRd	DBLb	DBLg	DBLd	DBLe	DBLz	CIDRb	CIDRg	CIDRd	DBLb	DBLg	DBLd	DBLe	DBLz	CIDRb	CIDRg	CIDRd	DBLb	DBLg	DBLd	DBLe	DBLz	CIDRb	CIDRg	CIDRd	DBLb
				Sample_total:	464	152	198	201	157	0	0	157	198	0	0	0	313	5	24	2	3	0	0	0	0	281	7	1	0	14	6	0	0	0	112	133	6	4	3	0	0	113	0	6	0	69	38	0	0
Interpreted Results				Position D1	Position D1	Position D2	Position D2	Position D2	Position D2	Position D3	Position D3	Position D3	Position D3	Position D3	Position D3	Position D4	Position D4	Position D4	Position D4	Position D4	Position D4	Position D4	Position D4	Position D5	Position D5	Position D5	Position D5	Position D5	Position D5	Position D5	Position D5	Position D6	Position D6	Position D6	Position D6	Position D6	Position D6	Position D6	Position D6	Domain 07	Domain 07	Domain 07	Domain 07	Domain 07	Domain 07	Domain 07	Domain 07	Domain 08	Domain 08
Patient ID_cluster #	Cluster size			NTSA	NTSB	DBLa0	DBLa1	DBLa2	DBLpam1	CIDRa1	CIDRa2-6	CIDRb	CIDRg	CIDRd	CIDRa1.2-3	DBLb	DBLg	DBLd	DBLe	DBLz	CIDRb	CIDRg	CIDRd	DBLb	DBLg	DBLd	DBLe	DBLz	CIDRb	CIDRg	CIDRd	DBLb	DBLg	DBLd	DBLe	DBLz	CIDRb	CIDRg	CIDRd	DBLb	DBLg	DBLd	DBLe	DBLz	CIDRb	CIDRg	CIDRd	DBLb	DBLg
#9_cluster_74	292
#9_cluster_37	279			0	1	1	0	0	0	0	1	0	0	0		0	1	0	0	0	0	0	0	0	0	1	0	0	0	0	0	0	0	0	0	0	0	1	0	0	0	0	1	0	0	0	0	0	0
#9_cluster_23	264			0	1	1	0	0	0	0	1	0	0	0		0	0	1	0	0	0	0	0	0	0	0	0	0	1	0	0	0	0	0	0	0	0	0	0	0	0	0	0	0	0	0	0	0	0
#9_cluster_51	83			0	1	1	0	0	0	0	1	0	0	0		0	0	1	0	0	0	0	0	0	0	0	0	0	1	0	0	0	0	0	0	0	0	0	0	0	0	0	0	0	0	0	0	0	0
#9_cluster_14	73			0	1	1	0	0	0	0	1	0	0	0		0	0	1	0	0	0	0	0	0	0	0	0	0	1	0	0	0	0	0	1	0	0	0	0	0	0	0	0	0	0	0	0	0	0
#9_cluster_70	61			0	1	1	0	0	0	0	1	0	0	0		0	0	1	0	0	0	0	0	0	0	0	0	0	1	0	0	0	0	0	0	0	0	0	0	0	0	0	0	0	0	0	0	0	0
#9_cluster_0	48			0	1	1	0	0	0	0	1	0	0	0		0	0	1	0	0	0	0	0	0	0	0	0	0	0	1	0	0	0	0	0	1	0	0	0	0	0	0	1	0	0	0	0	0	0
#9_cluster_54	45			0	1	1	0	0	0	0	1	0	0	0		0	1	0	0	0	0	0	0	0	0	1	0	0	0	0	0	0	0	0	0	0	0	1	0	0	0	0	1	0	0	0	0	0	0
#9_cluster_82	43			0	1	1	0	0	0	0	1	0	0	0		0	0	0	0	0	0	0	0	0	0	0	0	0	0	0	0	0	0	0	0	0	0	0	0	0	0	0	0	0	0	0	0	0	0
#9_cluster_9	38			0	1	1	0	0	0	0	1	0	0	0		0	0	1	0	0	0	0	0	0	0	0	0	0	1	0	0	0	0	0	0	0	0	0	0	0	0	0	0	0	0	0	0	0	0
#9_cluster_16	31			0	1	1	0	0	0	0	1	0	0	0		0	0	1	0	0	0	0	0	0	0	0	0	0	0	1	0	0	0	0	0	0	0	0	0	0	0	0	0	0	0	0	0	0	0
#9_cluster_80	30			1	0	0	1	0	0	0		0	0	0	1	1	0	0	0	0	0	0	0	0	1	0	0	0	0	0	0	0	0	0	1	0	0	0	0	0	1	0	0	0	0	0	0	0	0
#9_cluster_66	21			0	0	1	0	0	0	0	1	0	0	0		0	0	0	0	0	0	0	0
#9_cluster_71	16			0	1	1	0	0	0	0	1	0	0	0		0	0	0	0	0	0	0	0	0	0	0	0	0	0	0	0	0	0	0	0	0	0	0	0	0	0	0	0	0	0	0	0	0	0
#9_cluster_76	12			0	1	1	0	0	0	0	1	0	0	0		1	0	0	0	0	0	0	0	0	1	0	0	0	0	0	0	0	0	0	0	1	0	0	0	0	0	0	1	0	0	0	0	0	0
#9_cluster_68	11			0	1	1	0	0	0	0	1	0	0	0		1	0	0	0	0	0	0	0	0	1	0	0	0	0	0	0	0	0	1	0	0	0	0	0	0	0	0	0	0	0	0	0	0	0
			Hit Rate:	0.0222717	0.74536	0.76095	0.0222717	0	0	0	0.76095	0	0	0	0.0222717	0.0393467	0.240535	0.44395	0	0	0	0	0	0	0.0393467	0.240535	0	0	0.385301	0.0586488	0	0	0	0.0081663	0.0764662	0.0445434	0	0.240535	0	0	0.0222717	0	0.285078	0	0	0	0	0	0
Suggested Composition
Patient ID_cluster #
#9_cluster_74
#9_cluster_37	NTSB3	DBLa0.9	CIDRa2.7	DBLg13	DBLd1	CIDRg2	DBLe2	DBLe2	DBLe2
#9_cluster_23	NTSB	DBLa0	CIDRa2.5	DBLd1	CIDRb1
#9_cluster_51	NTSB	DBLa0.6	CIDRa3.2	DBLd1	CIDRb6
#9_cluster_14	NTSB3	DBLa0.5	CIDRa2.3	DBLd1	CIDRb1	DBLe4
#9_cluster_70	NTSB7	DBLa0.12	CIDRa4	DBLd1	CIDRb5
#9_cluster_0	NTSB3	DBLa0.11	CIDRa2.4	DBLd1		DBLz6	DBLe9
#9_cluster_54	NTSB3	DBLa0.9	CIDRa2.7	DBLg13	DBLd1	CIDRg2	DBLe2	DBLe2	DBLe2
#9_cluster_82	NTSB3	DBLa0.6	CIDRa3.1
#9_cluster_9	NTSB	DBLa0.6	CIDRa3.2	DBLd1	CIDRb6
#9_cluster_16	NTSB3	DBLa0.1	CIDRa3.2	DBLd1	CIDRg1
#9_cluster_80	NTSA1	DBLa1.1	CIDRa1.2	DBLb11	DBLg1	DBLe1	DBLg1	DBLz	DBLe1	DBLg1
#9_cluster_66		DBLa0.15	CIDRa2.3
#9_cluster_71	NTSB2	DBLa0	CIDRa4
#9_cluster_76	NTSB7	DBLa0.6	CIDRa3.1	DBLb5	DBLg	DBLz	DBLe4
#9_cluster_68	NTSB3	DBLa0.4	CIDRa6	DBLb5	DBLg10	DBLd
[truncated: 177 more columns]

## Sheet: #10
	Total reads	Singletons
	1471	45
						Position D1	Position D1	Position D2	Position D2	Position D2	Position D2	Position D3	Position D3	Position D3	Position D3	Position D3	Position D4	Position D4	Position D4	Position D4	Position D4	Position D4	Position D4	Position D4	Position D5	Position D5	Position D5	Position D5	Position D5	Position D5	Position D5	Position D5	Position D6	Position D6	Position D6	Position D6	Position D6	Position D6	Position D6	Position D6	Domain 07	Domain 07	Domain 07	Domain 07	Domain 07	Domain 07	Domain 07	Domain 07	Domain 08
Patient ID_cluster #	Cluster size	Blast cluster sequence	Best Blast hit	E-value	# hits in varDB	NTSA	NTSB	DBLa0	DBLa1	DBLa2	DBLpam1	CIDRa1	CIDRa2-6	CIDRb	CIDRg	CIDRd	DBLb	DBLg	DBLd	DBLe	DBLz	CIDRb	CIDRg	CIDRd	DBLb	DBLg	DBLd	DBLe	DBLz	CIDRb	CIDRg	CIDRd	DBLb	DBLg	DBLd	DBLe	DBLz	CIDRb	CIDRg	CIDRd	DBLb	DBLg	DBLd	DBLe	DBLz	CIDRb	CIDRg	CIDRd	DBLb
#10_cluster_52	477	GAGACATTATAAGAGGAAAAGACCTTTATCTTGGAAATGCCAAAGAAAAAGATAAATTAGAAGAGAATTTGAAAAGAATTTTCAAGAAATTATATGAAGAATTGACGAAGAACAATAAGAATCCGGCAATAAAAACGCATTACGAAAAAGGCGCTCCAAATTATTATCAATTACGAAACGATTGGTGGGAACGTAATAGACAACAAGTATGGAATGCTATCACATGTGGTGCACCAAAAGAAGCTAAATATTTTAGAAGTACATGTTCATCTAAAGGTGTGCATTATGAAAAATGCCATTGTATTGGTGGAGATGTTCTTACAAATTTTGACTACGTCCCTCAATTTCTACGT	DBLa0.4	0	13	0	11	12	0	0	0	0	12	0	0	0	12	0	0	0	0	0	0	0	0	1	11	0	0	0	0	0	0	0	1	0	0	8	3	0	0	10	0	1	0	1	0	0	0
#10_cluster_23	172	TGATATCGTACGCGGCAAAGATCTGTATCGTGGTTATGATGATgaagaaaaaaaccgaagaaaacaattagagaagaaattgaaagaaattttcaagaaaatATATGAAGAATTGATAAAGAACGGGAGTAATGGAGAGGCAGCAAAAGAACGCTACAAAGATAATGACaaaaaaaaaTTTTTATCAATTACGAGAAGATTGGTGGGCACTTAATAGAAGAGACGTATGGAAAGCATTAACATGTGAAGCATCCGGTACATATTTTCGACACACATGTGGTGCTGGAGAAAAACGAACTGAGACTAAAAATAACTGCAAATGTATCAATGGTGATGTCCCCACATATTTTGACTACGTGCCGCAGTATCTTCGC	DBLa0.12	0	8	0	0	6	0	0	0	0	6	0	0	0	0	0	6	0	0	0	0	0	0	0	0	0	0	4	0	0	0	0	0	0	0	0	0	0	0	0	0	0	0	0	0	0	0
#10_cluster_64	120	GCGATATCGTACGCGGCAAAGATCTTTATATTGGTAATAAGAAAGAAAGAGCTAGATTAGAAGAAAATTTGATAACAATTTTCGCGAAAATATATAATAGTTTGAAGGATAAGGGAGGAGCAGAAACTCGCTACGGAAGTGATAAGGATTTCTTTCAATTACGAGAAGATTGGTGGAATAATAATAGAAAAATGGTATGGGATGCTATCACATGCGATGCTGCGGGTGGTACATATTTTCGACAAACATGTGGTATAAACGATACTTGGACTAAAGGTAAATGCCGATGTGCCGCTAATATCGATCCCCCAACCTATTTCGATTATGTGCCGCAGTATCTTCGC	DBLa0.4	0	13	0	11	12	0	0	0	0	12	0	0	0	12	0	0	0	0	0	0	0	0	1	11	0	0	0	0	0	0	0	1	0	0	8	3	0	0	10	0	1	0	1	0	0	0
#10_cluster_29	79	GGGATATCGTTAGAGGAAGAGATCTGTATCTCGGTGGTAATACCaaagaaaaaaaacaaagaaaaCAATTAGAAGAGAATTTACAAAACATTTTCGCGAAAATATATGGAGAATTGATAAAGAAAAAGACGAATGGGAAGGTACCAGAAAAATACTACCGAGAAGACGGACCAAATTATTTTCAATTAAGAGAAGATTGGTGGAACGCTAATAGACTTGATGTATGGAAAGCTATCACATGTGATGCAGGACAAGGTGCTCAATATGTTGGACTTACATGTTCTGATGGGAAAAGTTCGGCTCATGAAAAATGCACATGTGCTAACGGAGATGTACCTACATATTTTGACTACGTGCCACAGTATCTTCGT	DBLa0.7	0	9	0	8	8	0	0	0	0	8	0	0	0	0	0	8	0	0	0	0	0	0	0	0	0	0	8	0	0	0	0	0	0	0	0	0	0	0	0	0	0	0	0	0	0	0
#10_cluster_30	77	AGACATTGTACGAGGAAAAGATCTTTTCCTTGGTAATACATATGAAAGTGCACAAAGAGATAAATTAGAACAGAAATTGAAAGATATTTTCAAGGAAATACATGGTGGATTGGATGGGAAGACGCTACAAGAACGCTACAAAAAAGACGGTGATAATTTTTATCAATTACGAGAAGGTTGGTGGTATGCGAATCGAGAAACAATATGGAAAGCTATCACGTGCGAAGCTGGGGGTGGTAATAAATATTTTCGACAAACATGTGGTGATGATAGTGGAACGTTGTCTTATGCTAGTAACAAATGCCGGTGTGGCGACGGAGATGTAAATATTGTCCCCACATATTTTGATTATGTGCCACAGTATCTTCGC	DBLa0.11	0	8	0	8	8	0	0	0	0	8	0	0	0	8	0	0	0	0	0	0	0	0	0	8	0	0	0	0	0	0	0	0	0	0	6	2	0	0	1	0	0	0	0	0	0	0
#10_cluster_42	64	GAGACATTATAAGAGGAAAAGATCTGTATCGTCGTGATAAtaaaaaagataaattagaaaaaaatttaaaaaCAATTTTCGGGAAAATACATAATGGATTGCATGGGGAAGCAAAAGATCGCTACAATGATACTGACAAAAACTATTACAAATTACGGGAAGATTGGTGGTATGCGAATCGAGAAACAGTGTGGGAAGCTATCACGTGCGACGCTCAGGGTTTTAACTATTTTCGACCAACGTGCAATGGAGGAAAACGAACTGAAGGTTACTGCCGGTGTGATAAGGACAAAAAGCCCGGCAAAAGTGAGACCGCCCAGGTTCCCACATATTTTGACTATGTGCCACAATATTTGAGA	DBLa0.9	1.31108e-165	1	0	1	1	0	0	0	0	1	0	0	0	0	0	1	0	0	0	0	0	0	0	0	0	0	1	0	0	0	0	0	0	0	0	0	0	0	0	0	0	0	0	0	0	0
#10_cluster_79	61	GGACATTGTCAGAGGAAAAGATCTTTTCCTTGGTCATAAACAAAGAAAAATTCAATTAGAAGAAAGATTACAAAAAATGTTTAAGAACATTAAGAAAACGAATCCAGCACTTTTACCCCTTGAAAATGAACAAGTCAGGGAATATTGGTGGAACGCTAATAGACAACAAGTGTGGAAAGCTATCACATGTGATGCTAAAGAGGAGGATACATATTCAAAAATCGCAGATGATGGTAGCATTCTTTGGAATGAAAAATGTGGTCGTGAACTTTCTAGTGTTCCAACAAACTTGGATTACGTCCCTCAATTTTTACGT	DBLa0.4	0	13	0	11	12	0	0	0	0	12	0	0	0	12	0	0	0	0	0	0	0	0	1	11	0	0	0	0	0	0	0	1	0	0	8	3	0	0	10	0	1	0	1	0	0	0
#10_cluster_43	40	AGACATTATAAGAGGAAAAGATCTTTATCGTGGTGACaaagaaaaaaaagaaaaaTTAGAATTGAAATTAAAAAGCTTTTTCAAGAATATATATGATGACTTGATAAACGATCAAGGGAAGAAGGATGCAGCAATAAAACACTACTTTGATCCCAAAGGAAATTATTATCAATTACGAGAAGATTGGTGGGATCTTAATAGACATGATGTATGGAAAGCTATCACTTGTTCAGCACCAAATGAAGCTAAATATAATGTAATTGTATCAGATGGAACTACAACAAAATCTAACTATAAAAAATGTAGAAACATTGCGGATGTTACCACATATTTCGATTATGTGCCTCAATATTTGAGA	DBLa0.4	0	200	0	159	163	0	0	0	0	166	0	0	0	0	0	153	0	0	0	0	0	0	0	0	0	0	122	23	1	0	0	0	2	0	0	0	0	0	0	0	0	1	0	0	0	0
#10_cluster_32	37	AGATATTGTAAGAGGAAGAGATTTGTATCGTGGTGATAATAGGgaaaaaaacaaaattagaaaagaaattaaaaaaaaTTTTCGGGATAATATATAACAATTTGATGAAAGACGTGACAAATGATCAGACGAAGAAGGTGGACAAAGCAAAAGAACGCTACAATGATCTTAAAGGAGATTTTTTTCAATTACGAGAAGATTGGTGGGAAGCTAATAGAGCAAAAGTATGGGAAGCCATCACGTGCGGACATCCGGGTGGTAAATATTTTCGTGCAACATGTGGTGGAAGAAATTCAACTAATGAAAAATGTCGATGTGTCAGTACCGATCCCCCAACCTATTTCGATTATGTGCCGCAGTATCTTCGC	DBLa0.11	0	1	0	1	1	0	0	0	0	1	0	0	0	0	0	1	0	0	0	0	0	0	0	0	0	0	1	0	0	0	0	0	0	0	0	0	0	0	0	0	0	0	0	0	0	0
#10_cluster_53	36	GAGATATTATACGAGGAAAAGATCTTTATCGTGGTAATAATGGAAAGGATAAATTAGAAAACAAGTTAAAAGAAATTTTCGGGAAAATACATGACAAATTGAATGATAGCATAAAATCAAACTATAATAATGATACTGAAAATTATTATCAATTACGGGAAGATTGGTGGTATGCGAACCGCGGCACAGTCTGGTATGCTATCACATGTCATGCAGGACAAAGTGATAAATATTTTCGACCAACATGTGTTTCAGGAGAATGGGCTAAAGACAAATGCCGATGTCCCAAGACAAGTGGCGCAAATGCCGACAAAGTCCCCACATATTTTGACTACGTCCCTCAGTATCTTCGC	DBLa0.9	0	1	0	1	1	0	0	0	0	1	0	0	0	1	0	0	0	0	0	0	0	0	1	0	0	0	0	0	0	0	0	1	0	0	0	0	0	0	0	0	0	0	1	0	0	0
#10_cluster_22	31	AGACATTATAAGAGGAAAAGATTTGTATCTCGGTGGTAATACcaaagaaaaaaagacaaagacaaaaaaaTAGAAGATAATTTGAAAGAAATTTTCAAGAATATATATGATGATTTGACGAAGACGAGCGGGAAGACGAATGGGGAGATAGAAGCTCGCTACAAAAAAGATGATGATCCAGATTATTTTCAATTACGAGAAGATTGGTGGAATAATAATAGAAAAATGGTATGGCGCGCGATAACATGCGGCGTTAAGGGTAATAAATATTTTCGACCAACATGTAATGGAGGAACATCTTCGACTAATACACAATGCCGATGTGTGATTGAAGGTGTTCCCACATATTTTGATTATGTGCCGCAGTATCTTCGC	DBLa0.16	0	7	0	3	3	0	0	0	0	3	0	0	0	0	0	3	0	0	0	0	0	0	0	0	0	0	2	1	0	0	0	0	0	0	0	0	0	0	0	0	0	0	0	0	0	0
#10_cluster_12	30	AGATATTGTGAGAGGAAGAGATCCATTTTATGGTAATACACAAGAAAAAGAAAAAAGAGAACAATTAGATGATAAGTTGAAAACAATTTTCGGGCATATATATGAAGAATTGAAGAAGGACAGCAAGAATGGGGAGATAGAAGCTCGCTACGAAAATGATCCTAAAGAAAATTATTATCAATTACGAGAAGATTGGTGGGACGCAAATCGGCACACCGTGTGGGAAGCTATCACATGCAATGCTGGGGGTGGTAATAAATATTTTCGACAAACATGTGGTAGTGGAAAAACTGCAACTCAGGCTAGTCACAAATGCCGGTGTGATGGCGCAAATGTATCAATGGTGATGTCCCCACATATTTTGACTACGTGCCGCAGTATCTTCGC	DBLa0.5	0	2	0	0	2	0	0	0	0	2	0	0	0	0	0	2	0	0	0	0	0	0	0	0	0	0	2	0	0	0	0	0	0	0	0	0	0	0	0	0	0	0	0	0	0	0
#10_cluster_1	19	AGACATCATTCGAGGAAAGGATCTATTTCGTGGTTATGATaaaaaagatcgaaaagaaaaacaaaaaaaTACAAGATAATTTGAAAGATATTTTCAAGAAAATACATGAGGACGTGATGTCAACGAGCCGCAATAATAAGGAGGTGCTAAAAGCTCGCTACAATGATAATGACAAAAATTTTTTTAAATTACGAGAAGATTGGTGGACTGCAAATCGGCACACCGTGTGGAAAGCCATCACATGTGCTGCTAAAGTAGGGGATACATATTTTCGGACAACATGTAGTGATCGTAATGGAAGTTTTTCTCAAGCTAATAACTACTGCCGGTGTGGCGACGACAAGCCAGATGACGACAAGCCAAATACCGATCCCCCAACCTATTTTGATTATGTGCCAC…	DBLa0.19	0	7	0	6	6	0	0	0	0	6	0	0	0	0	0	5	0	0	0	0	0	0	0	0	0	0	2	1	0	0	0	0	0	1	0	0	0	0	0	0	0	0	0	0	0	0
#10_cluster_45	18	TGACATTATTCGAGGAAAAGATCTATTTCGCGGTTATAATGaaaaagatagagaagaaaaaaaacaattacaagataatttaaaaagaattttcgcgaaaaTACATGGAAAATTGACGACGGCGAATGGTGTAAAATCTCGCTACAATGGTGACGGTCCAGAATTTTTTAAATTACGAGAAGATTGGTGGGCACTTAATAGACAAGATGTATGGAAAGCTATCACGTGCCGTGCTGGAGAGAATGATATATATTCAAAAAGCCCCGAACATGGTACAACGGGTGTTTCGCATGGTCAATGCGGCCACGAGGATCAACATGTCCAAACGTATTTAGATTATGTTCCTCAATATTTAAGA	DBLa0.9	1.31108e-165	1	0	1	1	0	0	0	0	1	0	0	0	0	0	1	0	0	0	0	0	0	0	0	0	0	1	0	0	0	0	0	0	0	0	0	0	0	0	0	0	0	0	0	0	0
#10_cluster_70	18	TGATATTATACGAGGAAAAGATCTGTATCGTGGTAATGATAGAGAAAATATACATTTAGAAAACCAATTAAAACAATATTTTAAGAAAATATATAACAAATTGGAGGATACTGAGGTACGAAAACACTACGAAGATGCCAAAGGAAATTATTATCAATTAAGGAATGCTTGGTGGGAAGCTAATAGACAAGAAGTATGGAAAGCTATCACATGTGGCGCTGCGGGGGGTACATATTTTCGAACAACAGCGTGTGCAGGACATGCAAGTAATGATAAATGTCAATGTCTCATTGGAGATGTTCCCACCTATTTCGATTATGTGCCGCAGTATCTTCGG	DBLa0.8	0	14	0	12	12	0	0	0	0	12	0	0	0	12	0	0	0	0	0	0	0	0	0	8	0	0	0	0	0	0	0	0	0	0	6	2	0	0	0	0	0	1	0	0	0	0
#10_cluster_76	16	GGATATCGTTAGAGGAAGAGATCTATTTCGCGGTTATGATGAAAAAGATCGAAAAGAAAAAGAACAATTAGACAATAATTTGAAAGAAATTTTTCAGAAGATTCAGGAAAATAATAAATCTAAACTAGGTCAACTTAAACTAGATCAGGTAAGAGAATACTGGTGGGCACTTAATAGAAACGATGTATGGAAAGCTATCACTTGTGGTGCAGGAGAAAGTGATAAATATTTTAGAGATACATGTTCTAAAGGTGGCACTTATAATAAATGTCATTGTAATGATGGAGATGTTCTTACGAATTTCGATTATGTGCCACAGTTTCTTCGC	DBLa0.16	2.54993e-177	7	0	5	5	0	0	0	0	5	0	0	0	0	0	5	0	0	0	0	0	0	0	0	0	0	4	1	0	0	0	0	1	0	0	0	0	0	0	0	1	0	0	0	0	0
#10_cluster_17	15	AGACATTATACGAGGAAAGGATCTTTTCGTTGGTTATAATGACACCGATAAAGCACACAAAGTAATATTACAACAACGTTTGAAAAAAATTTTCAAAGAAATATACGACAATTTGATGAAAGACGTGACAAAGGATAAGAAGAAGATGGCGGAAGCACAAAAACGCTACAAAGATACTACAAATTATTATCAATTGCGAGAAGATTGGTGGGACGCAAATCGCGCCAAAGTATGGTATGCCATCACTTGTGGTGCAGGAACTAGTGATAAATATTTTCGAAAAACATGTTCTAATGATACATCACACACTAACGAAAAATGTCGATGTGTCAGTACCGATCCTCCTACATATTTCGATTATGTGCCTCAATATTTGAGA	DBLa0.9	0	6	0	6	6	0	0	0	0	6	0	0	0	0	0	6	0	0	0	0	0	0	0	0	0	0	6	0	0	0	0	0	0	0	0	0	0	0	0	0	0	0	0	0	0	0
#10_cluster_3	14	TGACATTATACGAGGAAAAGATCTATATAGTGGCAATACCAaagaaaaaaaacgaagaaaacaattagaagaaaatttaaaaaCAATTTTCAAGCAAATACATAGTGACATGACGTCTAGCGGGAGGAGGAGTGGGAAGAAGTCGGCGCTACAAGCTCGCTACAATGATGATAATGAAAATTATTATCAATTACGAGAAGATTGGTGGGAAGCTAATAGAGAAACAGTATGGAAAGCATTAACATGTGATGCTCCAGGAGATGCTTCATATTTTCGAGCAACGTGCAGTGATCGTAAAGGAAGTTTTTCTCAAGCTAAGGATAAATGCCGCTGTACCAAGTCAAGTGGCGCTAATGCCGACCAGGTCCCCACATATTTTGACTATGTGCCACAATATTT…	DBLa0.1	0	18	0	8	8	0	0	0	1	7	0	0	0	0	0	8	0	0	0	0	0	0	0	0	0	0	7	1	0	0	0	0	0	0	0	0	0	0	0	0	0	0	0	0	0	0
#10_cluster_9	12	GGACATCGTTAGAGGAAGAGATTTGTATCGTGGTGATAATAGGGAAAAAACAAAATTAGAAAATAAGTTGAAAAATATTTTCAAGAAAATACATGAGGAAGTGACGAGCGGGAGTAATAGGCAGAAGCTAAAAGCACGCTACGAAGGTGATGAAGCCAATAATTTTTTTCAATTACGTGAAGATTGGTGGAACGCGAACCGCGCCACAGTATGGAAAGCTATCACATGTAAGGCGGAAGGTAATACATATTTTCGAAAAACAGCGTGTGGTGGAGGAAAAAGTGCGACTCCTAATAAATACTGCCGGTGTGACGGCGACCAGCCAGGTAACGACAAGGAAAATATCGATCCCCCAACCTATTTCGATTATGTGCCTCAATATTTAAGA	DBLa0.9	0	3	0	1	1	0	0	0	0	1	0	0	0	0	0	1	0	0	0	0	0	0	0	0	0	0	1	0	0	0	0	0	0	0	0	0	0	0	0	0	0	0	0	0	0	0
#10_cluster_44	11	TGACATTATACGAGGAAAAGATCTGTATCTTGGGAATaaaaaaaaaagtgaaaataaaagagagaaagaaaaattagaaggaaaattaaaaaGCTTTTTCGAGCAGATATATAATAGTTTGGACAGTAGCATAAGAACAAAGTATGATGATAAACACAAAAATTAATATAAATTAAGAGAAGATTGGTGGGAACTTAATAGACTTGATGTATGGAAAGCCATAACATGTGATGCGCCAGATGAAGCTAAATATAATGTAATTGGATCAGATGGAACTATAACACCATCTAACTATAAAAAATGTAGAGGTATTGTAGATGTTCCTACATATTTTGACTACGTGCCGCAGTATCTTCGC	DBLa0.4	0	107	0	68	74	0	0	0	0	74	0	0	0	10	1	58	0	0	0	0	0	0	0	10	0	0	43	12	0	0	0	0	9	0	8	0	0	0	0	0	0	0	0	0	0	0
					# hits in varDB	NTSA	NTSB	DBLa0	DBLa1	DBLa2	DBLpam1	CIDRa1	CIDRa2-6	CIDRb	CIDRg	CIDRd	DBLb	DBLg	DBLd	DBLe	DBLz	CIDRb	CIDRg	CIDRd	DBLb	DBLg	DBLd	DBLe	DBLz	CIDRb	CIDRg	CIDRd	DBLb	DBLg	DBLd	DBLe	DBLz	CIDRb	CIDRg	CIDRd	DBLb	DBLg	DBLd	DBLe	DBLz	CIDRb	CIDRg	CIDRd	DBLb
				Sample_total:	439	0	321	342	0	0	0	1	344	0	0	0	67	1	258	0	0	0	0	0	0	4	59	0	0	204	39	1	0	0	4	12	1	44	13	0	0	31	0	4	2	4	0	0	0
Interpreted Results				Position D1	Position D1	Position D2	Position D2	Position D2	Position D2	Position D3	Position D3	Position D3	Position D3	Position D3	Position D3	Position D4	Position D4	Position D4	Position D4	Position D4	Position D4	Position D4	Position D4	Position D5	Position D5	Position D5	Position D5	Position D5	Position D5	Position D5	Position D5	Position D6	Position D6	Position D6	Position D6	Position D6	Position D6	Position D6	Position D6	Domain 07	Domain 07	Domain 07	Domain 07	Domain 07	Domain 07	Domain 07	Domain 07	Domain 08	Domain 08
Patient ID_cluster #	Cluster size			NTSA	NTSB	DBLa0	DBLa1	DBLa2	DBLpam1	CIDRa1	CIDRa2-6	CIDRb	CIDRg	CIDRd	CIDRa1.2-3	DBLb	DBLg	DBLd	DBLe	DBLz	CIDRb	CIDRg	CIDRd	DBLb	DBLg	DBLd	DBLe	DBLz	CIDRb	CIDRg	CIDRd	DBLb	DBLg	DBLd	DBLe	DBLz	CIDRb	CIDRg	CIDRd	DBLb	DBLg	DBLd	DBLe	DBLz	CIDRb	CIDRg	CIDRd	DBLb	DBLg
#10_cluster_52	477			0	1	1	0	0	0	0	1	0	0	0		1	0	0	0	0	0	0	0	0	0	1	0	0	0	0	0	0	0	0	0	0	0	0	0	0	0	0	0	0	0	0	0	0	0
#10_cluster_23	172			0	0	1	0	0	0	0	1	0	0	0		0	0	1	0	0	0	0	0	0	0	0	0	0	1	0	0	0	0	0	0	0	0	0	0
#10_cluster_64	1+B3420			0	1	1	0	0	0	0	1	0	0	0		1	0	0	0	0	0	0	0	0	0	1	0	0	0	0	0	0	0	0	0	0	0	0	0	0	0	0	0	0	0	0	0	0	0
#10_cluster_29	79			0	1	1	0	0	0	0	1	0	0	0		0	0	1	0	0	0	0	0	0	0	0	0	0	1	0	0	0	0	0	0	0	0	0	0	0	0	0	0	0	0	0	0	0	0
#10_cluster_30	77			0	1	1	0	0	0	0	1	0	0	0		1	0	0	0	0	0	0	0	0	0	1	0	0	0	0	0	0	0	0	0	0	1	0	0	0	1	0	0	0	0	0	0	0	0
#10_cluster_42	64			0	1	1	0	0	0	0	1	0	0	0		0	0	1	0	0	0	0	0	0	0	0	0	0	1	0	0	0	0	0	0	0	0	0	0	0	0	0	0	0	0	0	0	0	0
#10_cluster_79	61			0	1	1	0	0	0	0	1	0	0	0		1	0	0	0	0	0	0	0	0	0	1	0	0	0	0	0	0	0	0	0	0	0	0	0	0	0	0	0	0	0	0	0	0	0
#10_cluster_43	40			0	1	1	0	0	0	0	1	0	0	0		0	0	1	0	0	0	0	0	0	0	0	0	0	1	0	0	0	0	0	1	0	0	0	0	0	0	0	0	1	0	0	0	0	0
#10_cluster_32	37			0	1	1	0	0	0	0	1	0	0	0		0	0	1	0	0	0	0	0	0	0	0	0	0	1	0	0	0	0	0	0	0	0	0	0	0	0	0	0	0	0	0	0	0	0
#10_cluster_53	36			0	1	1	0	0	0	0	1	0	0	0		1	0	0	0	0	0	0	0	0	1	0	0	0	0	0	0	0	0	1	0	0	0	0	0	0	0	0	0	0	1	0	0	0	0
#10_cluster_22	31			0	1	1	0	0	0	0	1	0	0	0		0	0	1	0	0	0	0	0	0	0	0	0	0	0	0	0	0	0	0	0	0	0	0	0	0	0	0	0	0	0	0	0	0	0
#10_cluster_12	30			0	0	1	0	0	0	0	1	0	0	0		0	0	1	0	0	0	0	0	0	0	0	0	0	1	0	0	0	0	0	0	0	0	0	0
#10_cluster_1	19			0	1	1	0	0	0	0	1	0	0	0		0	0	1	0	0	0	0	0	0	0	0	0	0	0	0	0	0	0	0	0	0	0	0	0	0	0	0	0	0	0	0	0	0	0
#10_cluster_45	18			0	1	1	0	0	0	0	1	0	0	0		0	0	1	0	0	0	0	0	0	0	0	0	0	1	0	0	0	0	0	0	0	0	0	0	0	0	0	0	0	0	0	0	0	0
#10_cluster_70	18			0	1	1	0	0	0	0	1	0	0	0		1	0	0	0	0	0	0	0	0	0	1	0	0	0	0	0	0	0	0	0	0	1	0	0	0	0	0	0	1	0	0	0	0	0
#10_cluster_76	16			0	1	1	0	0	0	0	1	0	0	0		0	0	1	0	0	0	0	0	0	0	0	0	0	1	0	0	0	0	0	1	0	0	0	0	0	0	0	1	0	0	0	0	0	0
#10_cluster_17	15			0	1	1	0	0	0	0	1	0	0	0		0	0	1	0	0	0	0	0	0	0	0	0	0	1	0	0	0	0	0	0	0	0	0	0	0	0	0	0	0	0	0	0	0	0
#10_cluster_3	14			0	1	1	0	0	0	0	1	0	0	0		0	0	1	0	0	0	0	0	0	0	0	0	0	1	0	0	0	0	0	0	0	0	0	0	0	0	0	0	0	0	0	0	0	0
#10_cluster_9	12			0	1	1	0	0	0	0	1	0	0	0		0	0	1	0	0	0	0	0	0	0	0	0	0	1	0	0	0	0	0	0	0	0	0	0	0	0	0	0	0	0	0	0	0	0
#10_cluster_44	11			0	1	1	0	0	0	0	1	0	0	0		0	0	1	0	0	0	0	0	0	0	0	0	0	0	0	0	0	0	0	0	0	0	0	0	0	0	0	0	0	0	0	0	0	0
			Hit Rate:	0	0.835371	1	0	0	0	0	1	0	0	0	0	0.545232	0	0.454768	0	0	0	0	0	0	0.0293399	0.515892	0	0	0.405053	0	0	0	0	0.0293399	0.0456398	0	0.0774246	0	0	0	0.0627547	0	0.0130399	0.0472698	0.0293399	0	0	0	0
Suggested Composition
Patient ID_cluster #
#10_cluster_52	NTSB7	DBLa0.4	CIDRa6	DBLb5	DBLd
#10_cluster_23		DBLa0.12	CIDRa2.11	DBLd1	CIDRb
#10_cluster_64	NTSB7	DBLa0.4	CIDRa6	DBLb5	DBLd
#10_cluster_29	NTSB7	DBLa0.7	CIDRa3.2	DBLd1	CIDRb
#10_cluster_30	NTSB3	DBLa0.11	CIDRa2.3	DBLb	DBLd1	CIDRb1	DBLg10
#10_cluster_42	NTSB3	DBLa0.1	CIDRa3.1	DBLd1	CIDRb6
#10_cluster_79	NTSB7	DBLa0.4	CIDRa6	DBLb5	DBLd
#10_cluster_43	NTSB2	DBLa0.4	CIDRa3.1	DBLd1	CIDRb	DBLe13	DBLz4
#10_cluster_32	NTSB3	DBLa0.11	CIDRa2.4	DBLd1	CIDRb1
#10_cluster_53	NTSB3	DBLa0.9	CIDRa5	DBLb5	DBLg5	DBLd1	CIDRb1
#10_cluster_22	NTSB3	DBLa0.16	CIDRa3.4	DBLd1
#10_cluster_12		DBLa0.5	CIDRa2.5	DBLd1	CIDRb1
#10_cluster_1	NTSB3	DBLa0.19	CIDRa2.8	DBLd1
#10_cluster_45	NTSB3	DBLa0.1	CIDRa3.1	DBLd1	CIDRb6
#10_cluster_70	NTSB3	DBLa0.8	CIDRa3.5	DBLb8	DBLd1	CIDRb	DBLz6	DBLe9
#10_cluster_76	NTSB3	DBLa0.16	CIDRa3.4	DBLd1	CIDRb1	DBLe2	DBLe2	DBLe2
#10_cluster_17	NTSB3	DBLa0.9	CIDRa2.1	DBLd1	CIDRb1
#10_cluster_3	NTSB3	DBLa0.1	CIDRa3.2	DBLd1	CIDRb7
#10_cluster_9	NTSB3	DBLa0.9	CIDRa2.9	DBLd1	CIDRb5
#10_cluster_44	NTSB2	DBLa0.4	CIDRa4	DBLd1
[truncated: 177 more columns]

## Sheet: #11
	Total reads	Singletons
	2350	69
						Position D1	Position D1	Position D2	Position D2	Position D2	Position D2	Position D3	Position D3	Position D3	Position D3	Position D3	Position D4	Position D4	Position D4	Position D4	Position D4	Position D4	Position D4	Position D4	Position D5	Position D5	Position D5	Position D5	Position D5	Position D5	Position D5	Position D5	Position D6	Position D6	Position D6	Position D6	Position D6	Position D6	Position D6	Position D6	Domain 07	Domain 07	Domain 07	Domain 07	Domain 07	Domain 07	Domain 07	Domain 07	Domain 08
Patient ID_cluster #	Cluster size	Blast cluster sequence	Best Blast hit	E-value	# hits in varDB	NTSA	NTSB	DBLa0	DBLa1	DBLa2	DBLpam1	CIDRa1	CIDRa2-6	CIDRb	CIDRg	CIDRd	DBLb	DBLg	DBLd	DBLe	DBLz	CIDRb	CIDRg	CIDRd	DBLb	DBLg	DBLd	DBLe	DBLz	CIDRb	CIDRg	CIDRd	DBLb	DBLg	DBLd	DBLe	DBLz	CIDRb	CIDRg	CIDRd	DBLb	DBLg	DBLd	DBLe	DBLz	CIDRb	CIDRg	CIDRd	DBLb
#11_cluster_92	311	GAGACATTATACGAGGAAAAGATCTGTATCTAGGTGATAACGGAAAAGATAGATTAGAAGAGAATTTAAAAAGAATTTTCGGGAAAATACATGAGGCCGTGACGTCGACGAGAGGGAAGAATGCGGAGGAGCTAAAAGCACGCTACCAAGATGATCCCAACAAAAATTATTATCAATTACGAGAAGATTGGTGGAATAATAATAGAAAAATGGTATGGTACGCGATAACATGCGGCGCTGCGGGTGGTACATATTTTCGAAAAATATGTGGTACAGGAACGCCGACTAATAAACAATGCCGATGTACCACTCGTGTTGTTCCCACATATTTCGATTATGTGCCGCAGTATCTTCGC	DBLa0.9	0	12	0	1	4	0	0	0	0	6	0	0	0	0	0	5	0	0	0	0	0	0	0	0	0	0	5	0	0	0	0	0	0	0	0	0	0	0	0	0	0	0	0	0	0	0
#11_cluster_47	297	GAGATATTGTAAGAGGAAAAGATCTGTATCTCGGTTATGATcaaaaagaaaaagaccgaagagaaaatttagaaaagaatttgaaagaaaTTTTTGGGAATATATATAAGGACGTGATGAAGACGAGCAGGAAGAAGTCGGCGGAGGAGCTAAAAACACGCTACGAAGGTGATGGAAATTTTTATAAATTACGAGAAGATTGGTGGGACGCGAATCGCGCCAAAGTATGGTATGCTATCACGTGCGGTGCAGGAGAAAGTGATAAATATTTTAGAAATACATGTTCTAATGACATGTATCCGACGCATGAAAAATGTCGATGTGTCAGTACCGATCCCCCAACCTATTTTGACTACGTGCCGCAGTATCTTCGC	DBLa0.9	0	3	0	1	1	0	0	0	0	1	0	0	0	0	0	1	0	0	0	0	0	0	0	0	0	0	0	0	0	0	0	0	0	0	0	0	0	0	0	0	0	0	0	0	0	0
#11_cluster_88	287	GTGATATCGTTAGAGGAAGAGATTTGTATCGTGGTGATAAAGGAAAAAGAGAAAAATTAGAATCAAAATTAAAAAGCTTTTTCAAGAATATATATGATGACTTGATAAAGGATCAAGGGAAGAAGGATGCAGCAGAAAAATACTACTCTGATCCGAAAGGAGAttttttttCAATTACGAGAAGATTGGTGGGAACTTAATAGAAGAGACGTATGGAAAGCTATTACATGTAATGCACCGGAAGATGCTAAATATAAAGTAATAAAACCAGATGGCAGTACAACAGATTCGACATGGAAAAAATGTAGAGACGTTTCAGATGTTTCTACCAATTTTGATTATGTGCCGCAGTATCTTCGC	DBLa0.4	7.9116e-163	9	0	7	7	0	0	0	0	7	0	0	0	0	0	6	0	0	0	0	0	0	0	0	0	0	5	1	0	0	0	0	0	0	0	0	0	0	0	0	0	0	0	0	0	0
#11_cluster_106	255	GTGATATTGTCAGAGGAAGAGATCTGTATCTTCGAGAtaaaggaaaaagaaaaaaattagaagaaaaattgaaaaCAATTTTCGGGATAATATATGGAAAATTGAAGAATGGGAAGACGAATGGGCAGATAGAAGCTCGCTACGGACAAGACGGTCAAAATTTTTATCAATTACGAGAAGATTGGTGGAACGCTAATAGACAACAAGTATGGAAAGCTATTACATGCAACGCTGGGGGTTATTCATATTTTCGACCAACATGTAGTGAAGAATCTTTGAGTCAGGACAAGTGCCGCTGCGCGAACACAGATGTTCCCACTAATTTCGATTATGTGCCACAGTATCTTCGG	DBLa0.23	0	5	0	0	3	0	0	0	0	3	0	0	0	0	0	3	0	0	0	0	0	0	0	0	0	0	3	0	0	0	0	0	0	0	0	0	0	0	0	0	0	0	0	0	0	0
#11_cluster_19	234	CGATATTATAAGAGGAAAAGATCTGTATCTCGGTTATGATGatgaagaaaaaaaacaaagagataaattagacaagaagttgaaagaaattttcaaagaaaTATATGATGACGTGACGAGAGGGAAGAACGGGAAAGCAAAAGAACGCTACAATGATACTGAAAATTATTTTCAATTGCGAGAAGATTGGTGGACGGCGAATCGCTCCACAGTATGGAAAGCTATCACATGTGAAGTTAAGAGTGGTTCTCAATATTTTCGACCAACATGTGGTAGTGATGAAAAAAATTCAACTCAGGCTAAAAATAACTGCCGCTGTAAGGACGAAAACGGCAAAAATGACACCGATCAAGTCCCCACATATTTTGACTATGTTCCTCAATATTTGAGAT	DBLa0.15	3.40962e-112	3	0	2	2	0	0	0	0	2	0	0	0	0	0	2	0	0	0	0	0	0	0	0	0	0	1	1	0	0	0	0	0	0	0	0	0	0	0	0	0	0	0	0	0	0
#11_cluster_14	219	TGATATCGTTAGAGGAAGAGATTTGTATCGTGGTGATAAAGgaaaaagatcaacaagaaagagaaaaattagaacagaaattgaaagaaattttcgcgaaaaTACATAGTGAAGTGACGAATGGGAAGTATGGTGTAAAAGATCGCTACAATGATGATACTCCAGAGTTTTATAAATTACGAGAAGATTGGTGGACGGCGAATCGCGCCACAATCTGGGAAGCCATCACATGCAGCGCTGCGGGGGGTAATATATATTTTCGAGCAACGTGCGATAGTGGTGATGCACGAAAACCATCTCTGACTCAAAATAACTGCCGCTGTACCAAGTCAAGTGGCGCAAAGGCCGACGACCAAGTCCCCACATATTTTGACTACGTGCCTCAATATTTGAGA	DBLa0.11	0	22	0	16	17	0	0	0	0	17	0	0	0	0	0	16	0	0	0	0	0	0	0	0	0	0	15	0	0	0	0	0	0	0	0	0	0	0	0	0	0	0	0	0	0	0
#11_cluster_75	129	AGATATTGTAAGAGGAAAAGATCTTTTCATTGGTTATGATaaaaaagatcgaaaagaaaaacaaaaaaaTACAAGATAATTTGAAAGATATTTTCAAGAAAATACATGAGGGATTGACGACGACGATTGGCGCAGAAGCACGCTACAAAGGTGATGAAAATTATTTTCAATTAAGAGAAGATTGGTGGACGGCGAATCGAGAAACGGTATGGAAAGCATTAACATGTGACGCGCGAGATAAAGCTGAATATTTTAGAAAAACATGTTCTAATGGAGGTAGTTATGCTTATAAACAATGCCGGTGTAACGACGGAGATGTAAATGTTGTCCCCACATATTTTGACTACGTCCCTCAGTATCTTCGC	DBLa0.12	8.48302e-123	4	0	2	2	0	0	0	0	2	0	0	0	0	1	1	0	0	0	0	0	0	0	1	0	0	0	0	0	0	0	0	0	0	0	1	0	0	0	0	0	0	0	0	0	0
#11_cluster_68	75	GAGATATTATTCGAGGAAAAGATCTGTATCTGGGTTATGACGATgaagaaaaaaaacgaagagaaaaattagaaaataatttgaaagatattttcaagaaaaTATATAATGACGTGACGAATGGGAGGAATGGAGAGGCAGCACAAAAACGCTACAATGATGCAACTGGAAATTATTATAAATTACGAGAAGATTGGTGGTATGCTAATAGACAAGATATCTGGAAAGCCATTACATGCAGCGCTGAGGGTTATCAATATTTTCGAAAAACAGCATGTAATGGAGGAAAATCTTCGACTCAAGGTAAATGCCGGTGTGACGGCGACCAGGTTCCCACATATTTCGACTATGTGCCACAATATTTAAGA	DBLa0.9	0	12	0	1	4	0	0	0	0	6	0	0	0	0	0	5	0	0	0	0	0	0	0	0	0	0	5	0	0	0	0	0	0	0	0	0	0	0	0	0	0	0	0	0	0	0
#11_cluster_110	71	TGATATTGTAAGAGGAATAGATATGTTTAAACCAAATGTCCATGACAAAGTAGAAAAGGGTCTCCGAGAGGTTTTCAAGAAAATACATGATGGAATGGAAGATGAAGTAAAAAATGATTACAATCCTGATGGATCTGGAAATTATTATAAATTAAGAGAAGCATGGTGGAATGTGAATAGAAATAAAGTATGGGAAGCCATAACCTGTGGGGCACTACCTAAATCTGCATATGTCTTGCAATCAGAAAATAATACACAATTACCTTCATATCTTAAATGCGGCCATAATAATAAGGATGATCCTCCTACCAATTTAGATTATGTTCCTCAATATTTACGT	DBLa1.1	0	200	155	0	0	158	0	0	156	2	0	0	0	153	0	0	0	1	0	0	0	0	142	0	0	0	0	0	0	0	1	0	129	0	0	0	0	0	116	1	0	0	0	0	0	0
#11_cluster_31	67	GTGATATTGTAAGAGGAAAAGATCTGTATCTCGGTGATAAAGGAGaaaaaaaaaaaTTAGAAAAGAATTTGAAAAGAATTTTCGGGGATATATATGAAGAATTGTCGAGGACGACGACGAGCGGGAGGACGAATGGGAGGAATGTAAACAAGCAGTCTGTACAAGAACGCTACGGAAGTGATAAAGATTTCTTTCAATTACGAGAAGATTGGTGGACTGCTAATAGACAAGAAATATGGAAAGCAATCACATGTCATGCAGGAGAAAGTGATAAATATTTTCGACAAACATGTTCTAATGGAGGTAGTTATGCTTATAAACAATGCCGGTGTAAGGGCGACCAGGTCCCCACCTATTTTGACTACGTGCCGCAGTATCTTCGC	DBLa0.4	7.9116e-163	9	0	7	7	0	0	0	0	7	0	0	0	0	0	6	0	0	0	0	0	0	0	0	0	0	5	1	0	0	0	0	0	0	0	0	0	0	0	0	0	0	0	0	0	0
#11_cluster_9	64	CGATATTGTAAGAGGAAGAGATTTATATCTTGGCAATAGaaaaaaaaaGCCAACAGAAAGAGATCAATTAGAAAGTAAGTTGaaaaaaaaTTTTCAAGCAAATACATGGTGGATTGACAGGTGGTGTAAAAGCTCGCTACACAAATGACGGTGATAATTATTTTCAATTACGAGAAGATTGGTGGACTGCAAATCGAGAAACAGTATGGAAAGCCATCACATGTGCTGCTAAAGTAGGGGATACATATTTTCATGCAACGTGCGGTGATAGTGGAAGTCCATCTGTAGCCAAGGATCACTGCCGGTGTGGCAACGACCAGTCAGGTCGCGACAAGTCAAAGCCAGGAAAGCCCGGCGCAAATATTGTCCCCACATATTTTGACTATGTGCCTCAATATT…	DBLa0.15	3.40962e-112	3	0	2	2	0	0	0	0	2	0	0	0	0	0	2	0	0	0	0	0	0	0	0	0	0	1	1	0	0	0	0	0	0	0	0	0	0	0	0	0	0	0	0	0	0
#11_cluster_25	62	TGATATCGTACGCGGCAAAGATCTTTTCCTCGGTAATGATAAAGAAAAAGATCAAAGAAAAGTATTAGACAAGAAGTTGAAAACAATTTTCAAGAAAATATATGAAGGATTGAAGAAGGACAGGAAGAATTGGGCGAAGGAGCTACAAGAACGCTACAAAGATGATCCTAAAGAAAATTTTTATAAATTACGAGAAGATTGGTGGACGGCGAATCGAGAAACGGTATGGAAAGCAATTACATGTGACGACAGGCTAGCAAGTGCTTCATATTTTCGACCAACGTGCAATAGTGGTGATGAACAGAACCCAAGTCCGACTCATAAACAATGCCGGTGTGGCGACGACCAGGTTCCCACATATTTTGACTATGTGCCGCAGTATCTTCGC	DBLa0.11	0	22	0	16	17	0	0	0	0	17	0	0	0	0	0	16	0	0	0	0	0	0	0	0	0	0	15	0	0	0	0	0	0	0	0	0	0	0	0	0	0	0	0	0	0	0
#11_cluster_4	60	TGATATTGTAAGAGGAAGAGATTTGTATGGTGGTAATAGCaaagaaaaagaacaaagaaaaaaattagagaagaatttgaaaaCAATTTTCGGGAATATATATAAGGACGTGACGTCTAACAGCAATAATAAGGAGGTGCTAAAAACACGCTACGAAGGTGATAAAGAAAATTATTTTTTTAAATTACGTGAAGATTGGTGGACTGCAAATCGGCACACCGTGTGGGAAGCTATCACATGTAAGGCTGGGGGTTATCAATATTTTCGAAAAACATGTGGTGGTGATGATGGAAAAACTGGAACTCTGACTCCTAGTCAATGCCGGTGTGGCGACGGCAAAAAGCCCCGCAAGGGAAGTGACAACGTAAATATTGTCCCCACCTATTTCGATTATGTGCC…	DBLa0.23	0	5	0	0	3	0	0	0	0	3	0	0	0	0	0	3	0	0	0	0	0	0	0	0	0	0	3	0	0	0	0	0	0	0	0	0	0	0	0	0	0	0	0	0	0	0
#11_cluster_37	30	AGATATTGTCAGAGGAAGAGATTTGTATCTCGGTGATAATAGGgaaaaaaacaaaattagaaaagaatttgaaaaaaaTTTTCAAGCAAATATATAATGAGGTGACGAAGACGAGCGAGAGGACGAATGGCGCAAAAGCACGCTACGGAGGTGATAAAGATTTCTTTCAATTACGAGAAGATTGGTGGAATGCTAATAGAAGACAGGTATGGAAAGCTATCACGTGCGACGCTAAGGATTTTAACTATTTTCGACAAACAGCATGTAATGGAGGAAGTCCAACTAAAGGTTACTGCCGGTGTAACGGCGACAAGCCAGATAAGGACGTGGTAAATATCGATCCCCCAACCTATTTTGACTACGTGCCGCAGTATCTTCGG	DBLa0.5	1.09293e-151	5	0	3	3	0	0	0	0	3	0	0	0	0	0	2	0	0	0	0	0	0	0	0	0	0	1	0	0	0	0	0	0	0	0	0	0	0	0	0	0	0	0	0	0	0
#11_cluster_43	18	TGATATTATAAGAGGAAAAGACCTGTATCTTGGTAAtagaaaggaaaaagaaaaagaaaaattacaaaagaatttgaaatttattttcaaaaaaaTATATGATGACCTGATGAAGGACCTGAAGAACCAACCGGCGAAGAAAGAGAAGAGGAAGAACGCAGAAGCACGCTACCGAAATGATCCAAATTTTTATAAATTACGAGAAGATTGGTGGGATGCTAATAGACAACAGGTATGGAATGCTATCACATGTGGTGTAACAGATGGTGATAAATATTTTAGAAATACATGTTCTAAAGGTGGCCATTATAATAAATGTCATTGTAATGATGGAGATGTTCTCACGAATTTCGACTACGTGCCGCAGTATCTTCGT	DBLa0.18	0	5	0	0	3	0	0	0	0	3	0	0	0	3	0	0	0	0	0	0	0	0	1	1	0	0	0	0	0	0	0	0	0	0	1	0	0	0	0	0	0	0	0	0	0	0
#11_cluster_15	13	TGATATCGTACGCGGTAAAGATCCATTTTATGGTAATACACATGAAAGTACACAAAGAGAAAAATTAGAGAAGAATTTGAAAGAAATTTTCAAGAAAATACATAATAATTTGCAGGATAATGAAGCAAAAGAACGCTACAAAGAGGATCCCGACAATAATTATTCTAAATTAAGAGAAGATTGGTGGACAGCGAATCGCGCCACAATCTGGAAAGCCATCACATGTAACGCTTGGGGTGATACATATTTTCATGCAACGTGCAGTGATAGTCATCGTAAAGAAAGTTGTTGTCAAGCTAATCACTACTGCCGGTGTGGCAACGACAAACCAGGTGAAGACAATCCAAATACCGATCCCCCAACCTATTTCGATTATGTGCCACAGTATCTTCGC	DBLa0.23	0	5	0	0	3	0	0	0	0	3	0	0	0	0	0	3	0	0	0	0	0	0	0	0	0	0	3	0	0	0	0	0	0	0	0	0	0	0	0	0	0	0	0	0	0	0
					# hits in varDB	NTSA	NTSB	DBLa0	DBLa1	DBLa2	DBLpam1	CIDRa1	CIDRa2-6	CIDRb	CIDRg	CIDRd	DBLb	DBLg	DBLd	DBLe	DBLz	CIDRb	CIDRg	CIDRd	DBLb	DBLg	DBLd	DBLe	DBLz	CIDRb	CIDRg	CIDRd	DBLb	DBLg	DBLd	DBLe	DBLz	CIDRb	CIDRg	CIDRd	DBLb	DBLg	DBLd	DBLe	DBLz	CIDRb	CIDRg	CIDRd	DBLb
				Sample_total:	324	155	58	78	158	0	0	156	84	0	0	0	156	1	71	0	1	0	0	0	0	143	2	0	0	62	4	0	0	1	0	129	0	1	1	0	0	116	1	0	0	0	0	0	0
Interpreted Results				Position D1	Position D1	Position D2	Position D2	Position D2	Position D2	Position D3	Position D3	Position D3	Position D3	Position D3	Position D3	Position D4	Position D4	Position D4	Position D4	Position D4	Position D4	Position D4	Position D4	Position D5	Position D5	Position D5	Position D5	Position D5	Position D5	Position D5	Position D5	Position D6	Position D6	Position D6	Position D6	Position D6	Position D6	Position D6	Position D6	Domain 07	Domain 07	Domain 07	Domain 07	Domain 07	Domain 07	Domain 07	Domain 07	Domain 08	Domain 08
Patient ID_cluster #	Cluster size			NTSA	NTSB	DBLa0	DBLa1	DBLa2	DBLpam1	CIDRa1	CIDRa2-6	CIDRb	CIDRg	CIDRd	CIDRa1.2-3	DBLb	DBLg	DBLd	DBLe	DBLz	CIDRb	CIDRg	CIDRd	DBLb	DBLg	DBLd	DBLe	DBLz	CIDRb	CIDRg	CIDRd	DBLb	DBLg	DBLd	DBLe	DBLz	CIDRb	CIDRg	CIDRd	DBLb	DBLg	DBLd	DBLe	DBLz	CIDRb	CIDRg	CIDRd	DBLb	DBLg
#11_cluster_92	311			0	1	1	0	0	0	0	1	0	0	0		0	0	1	0	0	0	0	0	0	0	0	0	0	1	0	0	0	0	0	0	0	0	0	0	0	0	0	0	0	0	0	0	0	0
#11_cluster_47	297			0	1	1	0	0	0	0	1	0	0	0		0	0	1	0	0	0	0	0	0	0	0	0	0	0	0	0	0	0	0	0	0	0	0	0	0	0	0	0	0	0	0	0	0	0
#11_cluster_88	287			0	1	1	0	0	0	0	1	0	0	0		0	0	1	0	0	0	0	0	0	0	0	0	0	1	0	0	0	0	0	0	0	0	0	0	0	0	0	0	0	0	0	0	0	0
#11_cluster_106	255			0	0	1	0	0	0	0	1	0	0	0		0	0	1	0	0	0	0	0	0	0	0	0	0	1	0	0	0	0	0	0	0	0	0	0
#11_cluster_19	234			0	1	1	0	0	0	0	1	0	0	0		0	0	1	0	0	0	0	0	0	0	0	0	0	0	0	0	0	0	0	0	0	0	0	0	0	0	0	0	0	0	0	0	0	0
#11_cluster_14	219			0	1	1	0	0	0	0	1	0	0	0		0	0	1	0	0	0	0	0	0	0	0	0	0	1	0	0	0	0	0	0	0	0	0	0	0	0	0	0	0	0	0	0	0	0
#11_cluster_75	129			0	1	1	0	0	0	0	1	0	0	0		0	0	0	0	0	0	0	0	0	0	0	0	0	0	0	0	0	0	0	0	0	0	0	0	0	0	0	0	0	0	0	0	0	0
#11_cluster_68	75			0	1	1	0	0	0	0	1	0	0	0		0	0	1	0	0	0	0	0	0	0	0	0	0	1	0	0	0	0	0	0	0	0	0	0	0	0	0	0	0	0	0	0	0	0
#11_cluster_110	71			1	0	0	1	0	0	0		0	0	0	1	1	0	0	0	0	0	0	0	0	1	0	0	0	0	0	0	0	0	0	1	0	0	0	0	0	1	0	0	0	0	0	0	0	0
#11_cluster_31	67			0	1	1	0	0	0	0	1	0	0	0		0	0	1	0	0	0	0	0	0	0	0	0	0	1	0	0	0	0	0	0	0	0	0	0	0	0	0	0	0	0	0	0	0	0
#11_cluster_9	64			0	1	1	0	0	0	0	1	0	0	0		0	0	1	0	0	0	0	0	0	0	0	0	0	0	0	0	0	0	0	0	0	0	0	0	0	0	0	0	0	0	0	0	0	0
#11_cluster_25	62			0	1	1	0	0	0	0	1	0	0	0		0	0	1	0	0	0	0	0	0	0	0	0	0	1	0	0	0	0	0	0	0	0	0	0	0	0	0	0	0	0	0	0	0	0
#11_cluster_4	60			0	0	1	0	0	0	0	1	0	0	0		0	0	1	0	0	0	0	0	0	0	0	0	0	1	0	0	0	0	0	0	0	0	0	0
#11_cluster_37	30			0	1	1	0	0	0	0	1	0	0	0		0	0	1	0	0	0	0	0	0	0	0	0	0	1	0	0	0	0	0	0	0	0	0	0	0	0	0	0	0	0	0	0	0	0
#11_cluster_43	18			0	0	1	0	0	0	0	1	0	0	0		1	0	0	0	0	0	0	0	0	0	0	0	0	0	0	0	0	0	0	0	0	0	0	0	0	0	0	0	0	0	0	0
#11_cluster_15	13			0	0	1	0	0	0	0	1	0	0	0		0	0	1	0	0	0	0	0	0	0	0	0	0	1	0	0	0	0	0	0	0	0	0	0
			Hit Rate:	0.0323905	0.809763	0.967609	0.0323905	0	0	0	0.967609	0	0	0	0.0323905	0.0406022	0	0.900547	0	0	0	0	0	0	0.0323905	0	0	0	0.629106	0	0	0	0	0	0.0323905	0	0	0	0	0	0.0323905	0	0	0	0	0	0	0	0
Suggested Composition
Patient ID_cluster #
#11_cluster_92	NTSB3	DBLa0.9	CIDRa2.7	DBLd1	CIDRb1
#11_cluster_47	NTSB3	DBLa0.9	CIDRa2.1	DBLd1
#11_cluster_88	NTSB2	DBLa0.4	CIDRa6	DBLd1	CIDRb1
#11_cluster_106		DBLa0.23	CIDRa3.2	DBLd1	CIDRb
#11_cluster_19	NTSB3	DBLa0.15	CIDRa3.1	DBLd1
#11_cluster_14	NTSB7	DBLa0.11	CIDRa2.2	DBLd1	CIDRb1
#11_cluster_75	NTSB	DBLa0.12	CIDRa2.4
#11_cluster_68	NTSB3	DBLa0.9	CIDRa2.7	DBLd1	CIDRb1
#11_cluster_110	NTSA1	DBLa1.1	CIDRa1.2	DBLb11	DBLg1	DBLe1	DBLg1	DBLz	DBLe1
#11_cluster_31	NTSB2	DBLa0.4	CIDRa6	DBLd1	CIDRb1
#11_cluster_9	NTSB3	DBLa0.15	CIDRa3.1	DBLd1
#11_cluster_25	NTSB7	DBLa0.11	CIDRa2.2	DBLd1	CIDRb1
#11_cluster_4		DBLa0.23	CIDRa3.2	DBLd1	CIDRb
#11_cluster_37	NTSB3	DBLa0	CIDRa2.3	DBLd1	CIDRb7
#11_cluster_43		DBLa0.18	CIDRa4	DBLb5
#11_cluster_15		DBLa0.23	CIDRa3.2	DBLd1	CIDRb
[truncated: 177 more columns]

## Sheet: #12
	Total reads	Singletons
	1667	101
						Position D1	Position D1	Position D2	Position D2	Position D2	Position D2	Position D3	Position D3	Position D3	Position D3	Position D3	Position D4	Position D4	Position D4	Position D4	Position D4	Position D4	Position D4	Position D4	Position D5	Position D5	Position D5	Position D5	Position D5	Position D5	Position D5	Position D5	Position D6	Position D6	Position D6	Position D6	Position D6	Position D6	Position D6	Position D6	Domain 07	Domain 07	Domain 07	Domain 07	Domain 07	Domain 07	Domain 07	Domain 07	Domain 08
Patient ID_cluster #	Cluster size	Blast cluster sequence	Best Blast hit	E-value	# hits in varDB	NTSA	NTSB	DBLa0	DBLa1	DBLa2	DBLpam1	CIDRa1	CIDRa2-6	CIDRb	CIDRg	CIDRd	DBLb	DBLg	DBLd	DBLe	DBLz	CIDRb	CIDRg	CIDRd	DBLb	DBLg	DBLd	DBLe	DBLz	CIDRb	CIDRg	CIDRd	DBLb	DBLg	DBLd	DBLe	DBLz	CIDRb	CIDRg	CIDRd	DBLb	DBLg	DBLd	DBLe	DBLz	CIDRb	CIDRg	CIDRd	DBLb
#12_cluster_128	431	AGATATTATACGAGGAAAAGACCTGTATCGTGGTAATAATGgaaaggaaagagaaaaagaagaattacaaaagaatttaaaaacaattttcaaaaaaaTATATGATAACTTATCTGATCCCAAAGCAAGAGATCACTACAATGATGCGGGTGAGAATTATTATCAATTACGAGAAGATTGGTGGAATGCCAATAGACAACAAGTTTGGAAAGCTATTACATGTGATGCGCCAAATAATGCTCAATATTTTAGAAATACATGTTCTGGTGGTAAACGTCCGACAACTGTAGAATGTCACTGCATTGATGGAACTGTCCCTACAAATTTAGATTATGTCCCTCAATTTTTACGT	DBLa0.12	0	2	0	2	2	0	0	0	0	2	0	0	0	0	0	2	0	0	0	0	0	0	0	0	0	0	1	1	0	0	0	0	0	0	0	0	0	0	0	0	0	0	0	0	0	0
#12_cluster_53	306	AGATATTGTAAGAGGAAGAGATCTGTATCGTGGTAATGATGaagaaaaaaaacaaagagatgacttagaaaataagttgaaaaaaattttcaagaaaaTACATAGTGACGTGACGAAGGGAGGGAAGAATGGGAAGAAGTCGGCGCTACAAACTCGCTACAAAGGTGATCGCGAGAAAAATTATTATAAATTAAGGGAAGATTGGTGGACTGCAAATCGGCACACCGTGTGGGAAGCCATGACATGTAACGCTGGGGGTTCTCAATATTTTCGACAAACAGCATGTAATGGAGGAACAAGTCCGACTCCTAATAAATGCCGATGTAGCGACAATCCAAATACCGATCCCCCAACCTATTTTGACTACGTGCCACAGTTTCTTCGCT	DBLa0.15	0	10	0	2	7	0	0	0	0	7	0	0	0	0	0	7	0	0	0	0	0	0	0	0	0	0	7	0	0	0	0	0	0	0	0	0	0	0	0	0	0	0	0	0	0	0
#12_cluster_31	136	AGACATTGTACGAGGAAAAGATCTTTTCCTTGGTTATAATGAAAGAGATAGAGaaaaaaaaagaaaaTTACAGGAGAATTTACAAAAAATTTTCGGGGATATATATATAAAGAATTGTCGACGAAGAATGGCGCAGAAGCACGCTACAAAGATAATGACGAAAATTATTATCAATTACGAGAAGATTGGTGGTATGCTAATAGAGAAACAGTATGGAAAGCTATCACGTGCGACGTTAAGAGTGGTAATAATTATTTTCGACGAACATGTGGTGGTGATAATGGAACTTTTTCTCAAGTTAATAAATACTGCCGGTGTAACGGCGACCAGCCAGGTAAGGACAAGGCAAATGTCGATCCCCCAACCTATTTTGACTATGTGCCGCAGTATCTTCGG	DBLa0.12	0	2	0	2	2	0	0	0	0	2	0	0	0	0	0	2	0	0	0	0	0	0	0	0	0	0	1	1	0	0	0	0	0	0	0	0	0	0	0	0	0	0	0	0	0	0
#12_cluster_119	131	AGATATTGTGAGAGGAAGAGATTTGTATTTAGGTAATACACAAGaaaaaaaacaaagaaaaCAATTAGATGATAAGTTGAAAGAAATTTTCCAGCAAATACATAGTGGATTGTCGAGGACGAGCGGCGCACAAACTTACTACGATGAAAATGGTGGAAACTTTTTTAAATTACGAGAAGATTGGTGGGAAGCTAATCGAGAAACGGTATGGAAAGCTATAACATGTGATGCTGAAGAGGAGGATACATATTTCAAAACATCAAGTGGCGGTGATTACTCATTTTCAGGTGGTAAATGTGGCCATGATGAAAATAATGTTATAACAAATTTAGATTACGTCCCTCAATTTTTGCGTT	DBLa0.1	8.10973e-138	1	0	0	0	0	0	0	0	0	0	0	0	0	0	0	0	0	0	0	0	0	0	0	0	0	0	0	0	0	0	0	0	0	0	0	0	0	0	0	0	0	0	0	0	0
#12_cluster_96	90	GCGATATCGTACGCGGCAAAGATCTATATCTTGGTAATAAAAAGCAATATGAAACTGAAAGGGAAAAGGAAATATTGCaaaaaaatttaaaaaaCATTTTCGCCAAAATATATGGAGACTTGAGCGAATCGGCAAAAAAACACTACAATGATAATGATAAAGACGGAAATTATTTCAAATTAAGGGAAGATTGGTGGATTGCTAATCGTGACCAAGTATGGAAAGCTATCACTTGTGATGCACCAAAAGATGCCAAGTATTTGGAAAAGAAAGATGGTCGTGCATATGGATGTACACATACAAGTTGTCACTGTGCTCGTGGTGATGTTCTTACAAATTTCGATTATGTGCCTCAATATTTGAGA	DBLa0.4	0	28	0	25	25	0	0	0	0	25	0	0	0	24	0	0	0	0	0	0	0	0	19	1	0	0	0	0	0	0	0	16	0	1	1	0	0	0	1	0	1	0	14	2	0	0
#12_cluster_82	82	GAGATATTGTAAGAGGAAAAGATCTGTATCGTGGTTATGATGATaaagaaaaagatcaaagaaaaaaattagaaaagaatttgaaaaacattttcaaagaaaTATATAATGGATTGGATGGGGAAGCACAAAAACGCTACAATGGTGACGGTGATAATTATTATCAATTACGAGAAGATTGGTGGACTGCAAATCGCGCCAAAGTATGGGAAGCAATTACATGTGATGCGCGAGATAATGCTGAATATTTTAGAAAAACACCGTGTGCAGGAACAAGTCCGACTGATGGTCAATGCCGGTGTGAGAAGAAAGGGGGAGGCGACGTAAATATTGTCCCCACATATTTCGATTATGTGCCGCAGTATCTTCGC	DBLa1.1	0	114	76	0	0	84	0	0	84	1	0	0	0	83	0	0	0	0	0	0	0	0	76	0	0	0	0	0	0	0	0	0	68	0	0	0	0	0	64	0	0	0	0	0	0	0
#12_cluster_67	57	AGATATTATACGAGGAAAAGATCTTTTCCTTGGTAATACATATGAAAGTGCACAAAGAATAATATTAGAAAATAATTTGATAGAAATTTTCAAGCAAATACATAATGGATTGTCGAACAATGGTGTAAACTCTCGCTACAAAGATACTAAAAATTATTATCAATTACGAGAAGATTGGTGGGAAGCTAATAGACAAGAAATATGGAAAGCTATCACGTGCAGCAAGGAGCTAAAGGATAATAGATATTTTCGAAACACATGCAATGATAGTGGAAGGTTGTCTGATGCTAATCACAAATGTCGTTGTCAGAAGAATGACGGCAAAAGTGAGACCGACCAAGTCCCCACATATTTCGATTACGTCCCTCAATATTTAAGAT	DBLa0.16	0	4	0	1	2	0	0	0	0	2	0	0	0	0	0	1	0	0	0	0	0	0	0	0	0	0	1	0	0	0	0	0	0	0	0	0	0	0	0	0	0	0	0	0	0	0
#12_cluster_1	30	AGATATTGTAAGAGGAAGAGATTTGTATCTTCGAGATAAAGGAGAAGAGACAAAATTAGAACAGAAATTGAAAGAAATTTTCGGGATAATATATAACAATTTGATGCAGGATTTAAAGAATGACAAGATAAGAGGCAAGAACAAAGGTAATGTGACGATGGAGGAAGCAGAAGCTCGCTACAATGATACTGACAAAAACTATTACAAATTACGAGAAGATTGGTGGACGGCGAATCGGCACACCGTGTGGGAAGCCATCACATGCAACGCTAAGGGTTCTCAATATTTTCGACGAACATGTGGTGATAAAAAAGGTCAATATCAAGCTAATAACAAATGCCGGTGTGAGAAGAAAAGTGGCACAAGTGGCGACGGAGATGTAAATATTGTCCCCAACCT…	DBLa0.23	1.27785e-121	1	0	0	0	0	0	0	0	0	0	0	0	0	0	0	0	0	0	0	0	0	0	0	0	0	0	0	0	0	0	0	0	0	0	0	0	0	0	0	0	0	0	0	0	0
#12_cluster_148	29	TGATATTATAAGAGGAATAGATATGTTTAAACCAAATGTCCATGACAAAGTAGAAAAGGGTCTCCGAGAGGTTTTCAAGAAAATACATGACTTGAATAAAAGCAAAATTAATGATTATGATGGTGATGGTCCAGAGTATTACAAATTAAGAGAAGCATGGTGGACAGCGAACAGAGATCAAGTATGGAAAGCCATAACCTGTGGCGCACTACCTAAATCTGCATATGTCTTGCAATCAGAAAATAATACACAATTACCTTCATATCTTAAATGCGGCCATAATAATAAGGATGATCCTCCTACCAATTTAGATTATGTTCCTCAATATTTACGT	DBLa1.1	0	114	76	0	0	84	0	0	84	1	0	0	0	83	0	0	0	0	0	0	0	0	76	0	0	0	0	0	0	0	0	0	68	0	0	0	0	0	64	0	0	0	0	0	0	0
#12_cluster_45	27	AGATATTGTAAGAGGAAAAGATCTTTTCCTTGGTAATACATATGAAAGTAAACAAAGAGAAAAATTAGAAGATAATTTGAAAACAATTTTCGGGAATATATATGAGAAATTATTGAAGGAAAACCAAAAGTATGGGAAGAATGCGGAGGAGCTACAAAAACACTACAAAGATGAATCTGGAAATTATTTTCAATTACGAGAAGATTGGTGGACTGTGAATCGCGCCACAGTATGGAAAGCATTAACATGTGAAGCATACGGTACATATTTTCGACCAACGTGCAGTGATGGAAAGAATCAGTCTCAAGCTAAAAAACAATGCCGGTGTGGCAACGGCGACGTAAGTATTGTCCCCACATATTTTGATTATGTGCCGCAGTATCTTCGC	DBLa0.16	0	4	0	1	2	0	0	0	0	2	0	0	0	0	0	1	0	0	0	0	0	0	0	0	0	0	1	0	0	0	0	0	0	0	0	0	0	0	0	0	0	0	0	0	0	0
#12_cluster_72	24	TGATATTATAAGGGGAAAAGATCTTTTTATAGGTTATAATCaaaaagatagagaagaaaaaaaaacaattacaagaaaatttaaaaaaaattttcaagaaaaTACATAGTGACGTGATGTCAATGAGCGGGAAGAATGTAAACAAGCAGTCTCTACAAGAACGCTACAAAGATGACGGTGGAAATTATTTTCAATTAAGAGAAGATTGGTGGGACGCTAACAGAAAAAAAGTCTGGGATGCTATTACATGTAAAGCTAAGGAAGCTGATAAATATTTTAGAAAAACAGCGTGTGGTACAGGAACGGGAACAGAAGGTCGATGCCGATGTGTCACAGATGTTCCCACATATTTCGATTATGTGCCACAGTTTGTACGT	DBLa0.12	0	2	0	2	2	0	0	0	0	2	0	0	0	0	0	2	0	0	0	0	0	0	0	0	0	0	1	1	0	0	0	0	0	0	0	0	0	0	0	0	0	0	0	0	0	0
#12_cluster_24	23	AGACATTATACGAGGAAAAGATCTGTATCTCGGTAATCCGCAAGAAAGTGCACAAAGAGATAAATTAGAAAAGAATTTGAAAGAAATTTTCGAGAAAATATATGAAGGATTGACGTCGACGAGCGACAAGAATGGGAAGAATGGGCAGATAGAAGCACGCTACAAAAAAGATGATGAGGATGGAAAttttttttCAATTACGAGAAGATTGGTGGAATGCTAATAGACAAGAAATATGGAAAGCATTAACATGTGATGCTCCAGATGATTCTAAATATTTTCGAGGAACATGTGGTGGTGGAAAAACTGGAACTCAGGCTAGTCACAAATGCCGCTGTACCAAGCCAAATGACGACCAGGTGCCCACATATTTCGATTATGTGCCACAGTATCTTCGC	DBLa0.11	0	3	0	2	2	0	0	0	0	2	0	0	0	0	0	2	0	0	0	0	0	0	0	0	0	0	2	0	0	0	0	0	0	0	0	0	0	0	0	0	0	0	0	0	0	0
#12_cluster_4	21	AGATATTATACGAGGAAAAGATTTGTATCTGGGTTATGATGATAAAGAAAAAGATCAAAGAAAAGTATTAGAAAATAAGTTGAAAGATATTTTCGAGAAAATATATAAGGACGTGACGACAAATGGGAAGAAAGGGCAGAAGTCGGCGCTACAAAAACGCTACAATGGTGATGATCCAAATTATTATAAATTAAGAGAAGACTGGTGGGACGCTAATCGAGCAAAAGTATGGGAAGCCATCACGTGCGGTGCAGGAGAAAGTGATAAATATTTTCGACGAACATGTGGTAGTGGTGATGGAAAAACTGGAACTCTGACTCCTAGTCAATGCCGGTGTGGCGACGGCAAGTCAAAGGTCGGCACAAATGAGACCGACCAGGTTCCCACATATTTCGATTA…	DBLa1.1	0	114	76	0	0	84	0	0	84	1	0	0	0	83	0	0	0	0	0	0	0	0	76	0	0	0	0	0	0	0	0	0	68	0	0	0	0	0	64	0	0	0	0	0	0	0
#12_cluster_123	16	GGACATTGTCAGAGGAAAAGATCTTTATCTGGGAGATAAAAAAGAAAAATTGGACTTAGAAAAGAAATTGAAAGATATTTTCGCGAAAATACATGAGGGATTGTCGAGGAAGAATGGTGTAAAAGACCACTACAATGATCCTAAAGGAGATTTTTTTAAATTAAGAGAAGATTGGTGGTATGCTAATCGCGCCACAGTATGGGAAGCTATTACATGTGACGAAGAGAACAAGATAAGAGATGCTCCATATTTTCGAGGAACATGTGGTACAGGAACGTGGACTAATGAAAAATGCCGCTGTGAAGGCGCAAATATTGTCCCCACATATTTCGATTATGTGCCGCAGTATCTTCGT	DBLa0.11	0	1	0	0	1	0	0	0	0	1	0	0	0	0	0	1	0	0	0	0	0	0	0	0	0	0	1	0	0	0	0	0	0	0	0	0	0	0	0	0	0	0	0	0	0	0
#12_cluster_25	11	TGATATTATTCGAGGAAAAGATCTGTATCTCGGTTATGATGAtaaagaaaaagaacaaagaaaaaaattagaagaaaaattaaaaCAATATTTCAAGAATATATATGAGAAATTATTGGAGGAAAACCAAAAGAATGGGAAGAAGTCGGCGCTACAAGCACGCTACCAAGATGAATCTGGAAATTATTTTCAATTACGAGAAGATTGGTGGGCACTTAATAGAAGAGACGTATGGAAAGCTATTACTTGTGACGAAGAGAACAAGCTAGGGGGTTATTCATATTTTCGACCAACGTGCATTGATGGACAAAGTGGAGCCCAAGCTAATAACCAATGTCGATGTCCCAAAGGCGACCAAGTCCCCACATATTTTGACTATGTGCCGCAGTATCTTCGG	DBLa0.11	0	29	0	21	23	0	0	0	0	23	0	0	0	0	0	22	0	0	0	0	0	0	0	0	0	0	0	21	0	0	0	0	0	0	0	0	0	0	0	0	0	0	0	0	0	0
					# hits in varDB	NTSA	NTSB	DBLa0	DBLa1	DBLa2	DBLpam1	CIDRa1	CIDRa2-6	CIDRb	CIDRg	CIDRd	DBLb	DBLg	DBLd	DBLe	DBLz	CIDRb	CIDRg	CIDRd	DBLb	DBLg	DBLd	DBLe	DBLz	CIDRb	CIDRg	CIDRd	DBLb	DBLg	DBLd	DBLe	DBLz	CIDRb	CIDRg	CIDRd	DBLb	DBLg	DBLd	DBLe	DBLz	CIDRb	CIDRg	CIDRd	DBLb
				Sample_total:	429	228	58	68	252	0	0	252	71	0	0	0	273	0	40	0	0	0	0	0	0	247	1	0	0	15	24	0	0	0	16	204	1	1	0	0	0	193	0	1	0	14	2	0	0
Interpreted Results				Position D1	Position D1	Position D2	Position D2	Position D2	Position D2	Position D3	Position D3	Position D3	Position D3	Position D3	Position D3	Position D4	Position D4	Position D4	Position D4	Position D4	Position D4	Position D4	Position D4	Position D5	Position D5	Position D5	Position D5	Position D5	Position D5	Position D5	Position D5	Position D6	Position D6	Position D6	Position D6	Position D6	Position D6	Position D6	Position D6	Domain 07	Domain 07	Domain 07	Domain 07	Domain 07	Domain 07	Domain 07	Domain 07	Domain 08	Domain 08
Patient ID_cluster #	Cluster size			NTSA	NTSB	DBLa0	DBLa1	DBLa2	DBLpam1	CIDRa1	CIDRa2-6	CIDRb	CIDRg	CIDRd	CIDRa1.2-3	DBLb	DBLg	DBLd	DBLe	DBLz	CIDRb	CIDRg	CIDRd	DBLb	DBLg	DBLd	DBLe	DBLz	CIDRb	CIDRg	CIDRd	DBLb	DBLg	DBLd	DBLe	DBLz	CIDRb	CIDRg	CIDRd	DBLb	DBLg	DBLd	DBLe	DBLz	CIDRb	CIDRg	CIDRd	DBLb	DBLg
#12_cluster_128	431			0	1	1	0	0	0	0	1	0	0	0		0	0	1	0	0	0	0	0	0	0	0	0	0	0	0	0	0	0	0	0	0	0	0	0	0	0	0	0	0	0	0	0	0	0
#12_cluster_53	306			0	1	1	0	0	0	0	1	0	0	0		0	0	1	0	0	0	0	0	0	0	0	0	0	1	0	0	0	0	0	0	0	0	0	0	0	0	0	0	0	0	0	0	0	0
#12_cluster_31	136			0	1	1	0	0	0	0	1	0	0	0		0	0	1	0	0	0	0	0	0	0	0	0	0	0	0	0	0	0	0	0	0	0	0	0	0	0	0	0	0	0	0	0	0	0
#12_cluster_119	131
#12_cluster_96	90			0	1	1	0	0	0	0	1	0	0	0		1	0	0	0	0	0	0	0	0	1	0	0	0	0	0	0	0	0	1	0	0	0	0	0	0	0	0	0	0	1	0	0	0	0
#12_cluster_82	82			1	0	0	1	0	0	0		0	0	0	1	1	0	0	0	0	0	0	0	0	1	0	0	0	0	0	0	0	0	0	1	0	0	0	0	0	1	0	0	0	0	0	0	0	0
#12_cluster_67	57			0	1	1	0	0	0	0	1	0	0	0		0	0	1	0	0	0	0	0	0	0	0	0	0	1	0	0	0	0	0	0	0	0	0	0	0	0	0	0	0	0	0	0	0	0
#12_cluster_1	30
#12_cluster_148	29			1	0	0	1	0	0	0		0	0	0	1	1	0	0	0	0	0	0	0	0	1	0	0	0	0	0	0	0	0	0	1	0	0	0	0	0	1	0	0	0	0	0	0	0	0
#12_cluster_45	27			0	1	1	0	0	0	0	1	0	0	0		0	0	1	0	0	0	0	0	0	0	0	0	0	1	0	0	0	0	0	0	0	0	0	0	0	0	0	0	0	0	0	0	0	0
#12_cluster_72	24			0	1	1	0	0	0	0	1	0	0	0		0	0	1	0	0	0	0	0	0	0	0	0	0	0	0	0	0	0	0	0	0	0	0	0	0	0	0	0	0	0	0	0	0	0
#12_cluster_24	23			0	1	1	0	0	0	0	1	0	0	0		0	0	1	0	0	0	0	0	0	0	0	0	0	1	0	0	0	0	0	0	0	0	0	0	0	0	0	0	0	0	0	0	0	0
#12_cluster_4	21			1	0	0	1	0	0	0		0	0	0	1	1	0	0	0	0	0	0	0	0	1	0	0	0	0	0	0	0	0	0	1	0	0	0	0	0	1	0	0	0	0	0	0	0	0
#12_cluster_123	16			0	0	1	0	0	0	0	1	0	0	0		0	0	1	0	0	0	0	0	0	0	0	0	0	1	0	0	0	0	0	0	0	0	0	0
#12_cluster_25	11			0	1	1	0	0	0	0	1	0	0	0		0	0	1	0	0	0	0	0	0	0	0	0	0	0	1	0	0	0	0	0	0	0	0	0	0	0	0	0	0	0	0	0	0	0
			Hit Rate:	0.0933522	0.781471	0.792786	0.0933522	0	0	0	0.792786	0	0	0	0.0933522	0.157001	0	0.729137	0	0	0	0	0	0	0.157001	0	0	0	0.303395	0.00777935	0	0	0	0.0636492	0.0933522	0	0	0	0	0	0.0933522	0	0	0	0.0636492	0	0	0	0
Suggested Composition
Patient ID_cluster #
#12_cluster_128	NTSB3	DBLa0.12	CIDRa2.1	DBLd1
#12_cluster_53	NTSB3	DBLa0.15	CIDRa2.5	DBLd1	CIDRb
#12_cluster_31	NTSB3	DBLa0.12	CIDRa2.1	DBLd1
#12_cluster_119
#12_cluster_96	NTSB3	DBLa0.4	CIDRa6	DBLb5	DBLg11	DBLd1	CIDRb6	DBLe2	DBLe2	DBLe2
#12_cluster_82	NTSA1	DBLa1.1	CIDRa1.2	DBLb11	DBLg1	DBLe1	DBLg1	DBLz1	DBLe1
#12_cluster_67	NTSB3	DBLa0.16	CIDRa3.4	DBLd1	CIDRb1
#12_cluster_1
#12_cluster_148	NTSA1	DBLa1.1	CIDRa1.2	DBLb11	DBLg1	DBLe1	DBLg1	DBLz1	DBLe1
#12_cluster_45	NTSB3	DBLa0.16	CIDRa3.4	DBLd1	CIDRb1
#12_cluster_72	NTSB3	DBLa0.12	CIDRa2.1	DBLd1
#12_cluster_24	NTSB3	DBLa0.11	CIDRa2.4	DBLd1	CIDRb1
#12_cluster_4	NTSA1	DBLa1.1	CIDRa1.2	DBLb11	DBLg1	DBLe1	DBLg1	DBLz1	DBLe1
#12_cluster_123		DBLa0.11	CIDRa2.4	DBLd1	CIDRb1
#12_cluster_25	NTSB3	DBLa0.11	CIDRa2.4	DBLd1	CIDRg
[truncated: 177 more columns]

[truncated: 21 more sheets: #13, #14, #15, #16, #17, #18, #19, #20, #21, #22, #23, #24, #25, #26, #27, #28, #29, #30, #31, #32 …]
